# Supplementary material
Source: PubMed Central journal article supplement (PMC3344980)
Supplement: 1202546109_pnas.201202546SI.pdf [file 1202546109_pnas.201202546SI.pdf]

# Supporting Information

Petricka et al. 10.1073/pnas.1202546109

## SI MS/MS Spectra

Data-dependent acquisition (DDA) MS/MS spectra have been uploaded as a Scaffold 3 (.sf3) file to <https://proteomecommons.org/dataset.jsp?i=76688> under the project “The Protein Expression Landscape of the *Arabidopsis* Root”, at the following hash:

```
X23FuCTH8OfiWJlsmY6qRkJNQ1xRB/O054rp+yohmAuHn-6nwn3zm5VmheEFVCYwlUKp4fn2DYtRfEjgpa33/dfRXveEA-AAAAAAExQ==
```

All encryption should be removed from files in the tranche repository at the Proteome Commons Public Repository, but if a passphrase is requested, it is “arabidopsis.”

Data-independent acquisition (MSE) spectra were too large for Tranche upload and have thus been added to a Duke-based public, noneditable repository called Express. These data are available as a Scaffold 3 (.sf3) file at the following link:

[https://discovery.genome.duke.edu/express/resources/2010/Petricka\\_MSESpectra\\_LabelFreeSupplemental\\_Condensed.sf3](https://discovery.genome.duke.edu/express/resources/2010/Petricka_MSESpectra_LabelFreeSupplemental_Condensed.sf3).

## Other Supporting Information Files

[SI Appendix \(PDF\)](#)
