# Supplementary material
Source: PubMed Central journal article supplement (PMC3344980)
Supplement: 1202546109_sapp.pdf [file 1202546109_sapp.pdf]

**Supplementary Figure S1.**  
**GeLC-MS/MS Proteomics Approach of this Study**

**GFP-marked  
cell line  
(pWER:GFP)  
Non-Hair  
Epidermis**

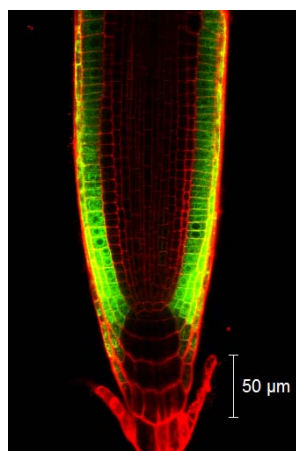

or

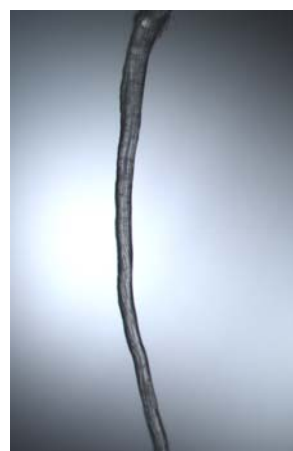

**Genetic  
Background  
*caprice  
triptychon*  
(Hairless)**

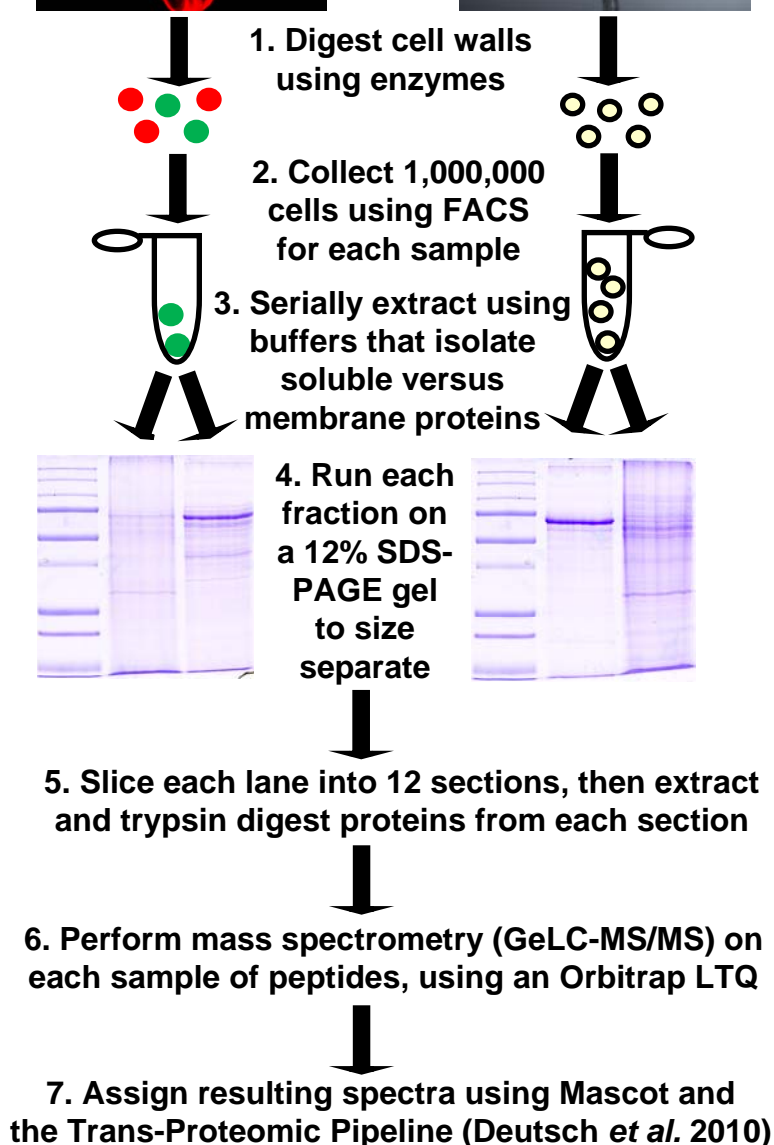

## Supplementary Figure S2.

### Peak-Integration Proteomics Approach of this Study

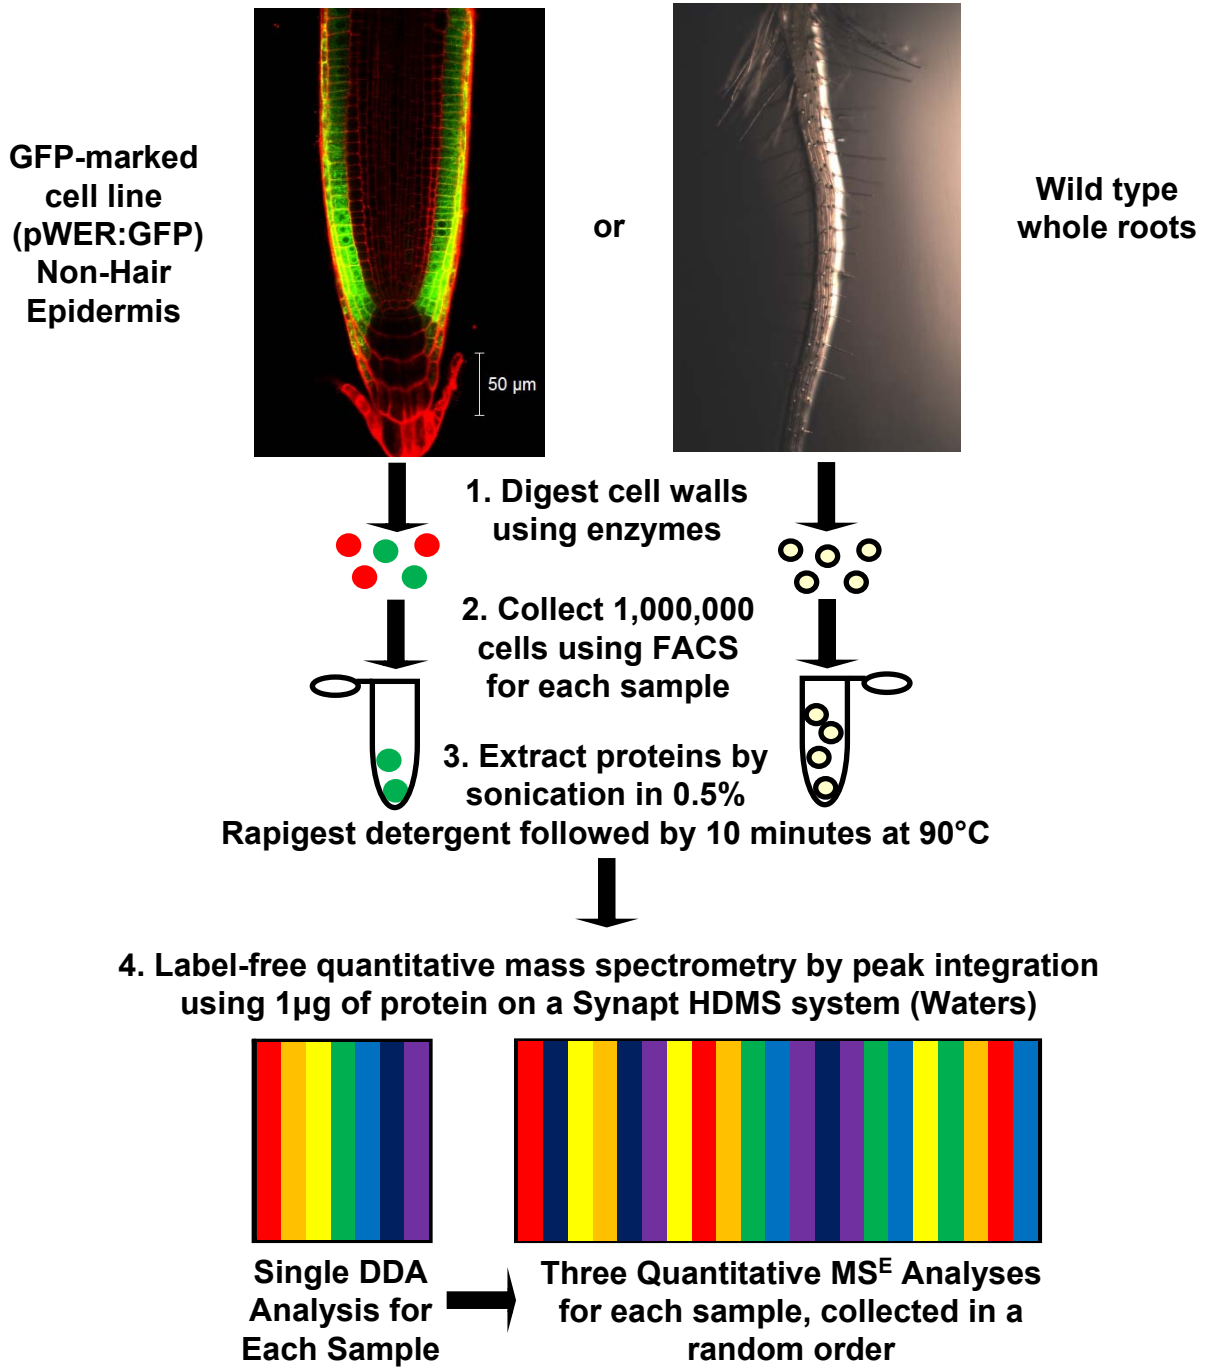

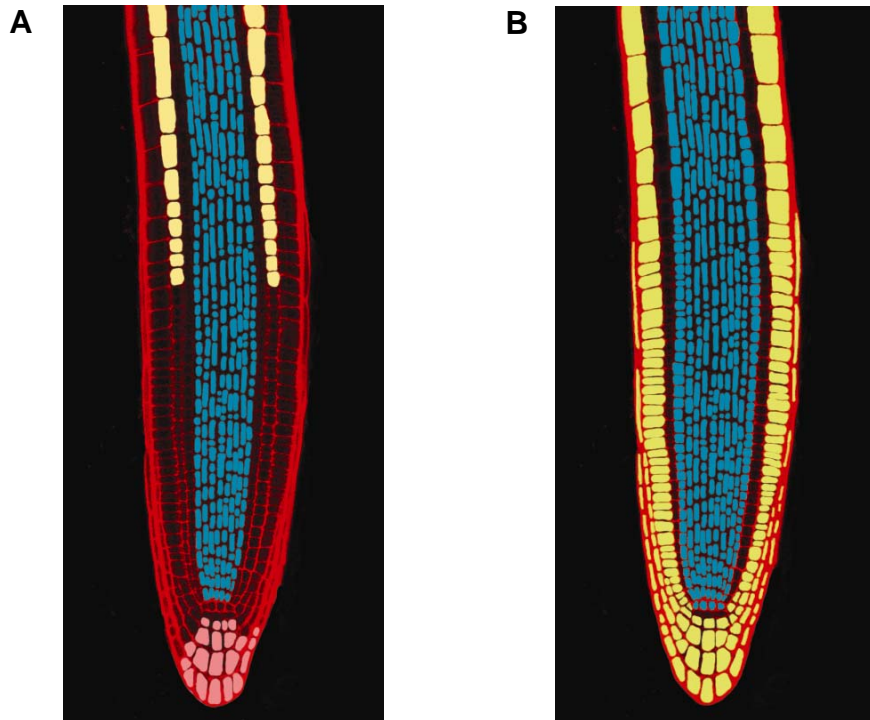

**Supplementary Figure S3.** Cell-type localization of PINFORMED auxin transporters and members of the TAILLESS complex.

**(A)** Schematic depicting the localization of PINFORMED (PIN) auxin transporters. Light yellow, blue, and pink cells correspond to cortex, vascular, and columella cells, respectively, where PIN2, PIN1, and PIN3, respectively, were detected by shotgun proteomics. A single unique peptide was identified for PIN2 in the cortex. Localizations of PIN1, PIN2, and PIN3 proteins from FACS coupled with shotgun proteomics agree with published localizations.

**(B)** Schematic depicting the differential localization of members of the TAILLESS complex based on the root cellular proteome. Blue cells display the localization of alpha, beta, delta, epsilon, eta, and gamma subunits in the endodermal, quiescent, and vascular cells. Yellow cells display the complementary localization of the theta subunit in non-hair epidermal and columella cells.

## Description of Spatial Clusters:

Spatial Clusters were obtained based on the identification of the 1,995 proteins from the Root Cellular Proteome, which was generated from GeLC-MS/MS proteomic profiling of six root cell populations that were isolated by FACS.

The first table is a summary of all of the binary clusters from this data and is titled “Summary of Spatial Clusters”.

Each binary spatial cluster is then shown. The data for Clusters 1-30 is provided in this document (Supplementary Figure S4), and the data for Clusters 31-60 is presented in Supplementary Figure S5. For each cluster, only unique proteins with two or more unique, high-confidence peptides are shown. A protein meeting this stringent criteria is given the value “1”, and this designation indicates the protein was detected. On the y-axis are all of the loci that were detected and belong to the given spatial cluster. Yellow denotes presence (value “1”), while black denotes absence (value “0”) of a protein in one of the following cell populations given on the x-axis of each cluster: COBL9 (Root Hairs), WER (Non-Hair Epidermis), CORTEX (Cortex), SCR (Endodermis/Quiescent Center), WOL (Vasculature), PET111 (Columella).

After the image of each spatial cluster, three tables are presented containing the following information:

- (1) Loci that correspond to the proteins in that spatial cluster
- (2) Gene ontology categories associated with these loci and corresponding p-value enrichment
- (3) Loci corresponding to enriched gene ontology categories

### Summary of Spatial Clusters

| Cluster #  | #proteins in cluster | Ratio of Total Proteins | Root Hairs (COBL9) | Non-Hair Epidermis (WER) | Cortex (CORTEX) | Endodermis/ Quiescent (SCR) | Vasculature (WOL) | Columella (PET111) |
|------------|----------------------|-------------------------|--------------------|--------------------------|-----------------|-----------------------------|-------------------|--------------------|
| 1          | 31                   | 0.0155                  | 1                  |                          |                 |                             |                   | 1                  |
| 2          | 14                   | 0.0070                  | 1                  | 1                        |                 | 1                           | 1                 |                    |
| 3          | 4                    | 0.0020                  |                    |                          |                 | 1                           | 1                 | 1                  |
| 4          | 4                    | 0.0010                  |                    | 1                        |                 | 1                           |                   |                    |
| 5          | 266                  | 0.1333                  | 1                  | 1                        | 1               | 1                           | 1                 | 1                  |
| 6          | 208                  | 0.1043                  |                    |                          |                 |                             | 1                 |                    |
| 7          | 87                   | 0.0436                  |                    |                          |                 |                             |                   | 1                  |
| 8          | 42                   | 0.0211                  | 1                  | 1                        | 1               |                             | 1                 |                    |
| 9          | 36                   | 0.0180                  | 1                  | 1                        | 1               | 1                           | 1                 |                    |
| 10         | 31                   | 0.0155                  | 1                  | 1                        |                 |                             | 1                 |                    |
| 11         | 24                   | 0.0120                  | 1                  | 1                        |                 |                             |                   | 1                  |
| 12         | 21                   | 0.0105                  | 1                  | 1                        |                 |                             | 1                 | 1                  |
| 13         | 21                   | 0.0105                  | 1                  |                          |                 | 1                           | 1                 | 1                  |
| 14         | 17                   | 0.0085                  |                    |                          | 1               |                             | 1                 |                    |
| 15         | 12                   | 0.0060                  | 1                  |                          | 1               |                             |                   | 1                  |
| 16         | 8                    | 0.0040                  |                    | 1                        | 1               |                             | 1                 |                    |
| 17         | 8                    | 0.0040                  |                    |                          | 1               | 1                           | 1                 |                    |
| 18         | 6                    | 0.0030                  |                    |                          | 1               |                             | 1                 | 1                  |
| 19         | 4                    | 0.0020                  |                    |                          | 1               | 1                           |                   | 1                  |
| 20         | 3                    | 0.0015                  |                    | 1                        |                 | 1                           | 1                 |                    |
| 21         | 2                    | 0.0010                  |                    | 1                        | 1               | 1                           | 1                 |                    |
| 22         | 2                    | 0.0010                  | 1                  | 1                        |                 | 1                           |                   |                    |
| 23         | 148                  | 0.0742                  | 1                  |                          |                 |                             | 1                 |                    |
| 24         | 91                   | 0.0456                  | 1                  | 1                        | 1               |                             | 1                 | 1                  |
| 25         | 66                   | 0.0331                  |                    |                          | 1               |                             |                   |                    |
| 26         | 48                   | 0.0241                  | 1                  |                          | 1               | 1                           | 1                 | 1                  |
| 27         | 48                   | 0.0241                  | 1                  |                          | 1               |                             | 1                 | 1                  |
| 28         | 42                   | 0.0211                  | 1                  |                          |                 | 1                           | 1                 |                    |
| 29         | 40                   | 0.0201                  | 1                  |                          | 1               | 1                           | 1                 |                    |
| 30         | 31                   | 0.0155                  | 1                  |                          | 1               |                             |                   |                    |
| 31         | 9                    | 0.0045                  |                    | 1                        |                 |                             | 1                 |                    |
| 32         | 4                    | 0.0020                  | 1                  | 1                        | 1               | 1                           |                   | 1                  |
| 33         | 238                  | 0.1193                  | 1                  |                          |                 |                             |                   |                    |
| 34         | 56                   | 0.0281                  |                    | 1                        |                 |                             |                   |                    |
| 35         | 11                   | 0.0055                  |                    | 1                        |                 |                             |                   | 1                  |
| 36         | 6                    | 0.0030                  |                    |                          | 1               | 1                           |                   |                    |
| 37         | 6                    | 0.0030                  | 1                  | 1                        | 1               |                             |                   | 1                  |
| 38         | 6                    | 0.0030                  |                    |                          |                 | 1                           |                   | 1                  |
| 39         | 4                    | 0.0020                  |                    | 1                        | 1               | 1                           | 1                 | 1                  |
| 40         | 3                    | 0.0015                  | 1                  |                          | 1               | 1                           |                   | 1                  |
| 41         | 1                    | 0.0005                  |                    | 1                        | 1               |                             |                   | 1                  |
| 42         | 28                   | 0.0140                  |                    |                          |                 | 1                           | 1                 |                    |
| 43         | 26                   | 0.0130                  | 1                  | 1                        |                 |                             |                   |                    |
| 44         | 5                    | 0.0025                  | 1                  |                          | 1               | 1                           |                   |                    |
| 45         | 2                    | 0.0010                  | 1                  | 1                        | 1               | 1                           |                   |                    |
| 46         | 1                    | 0.0005                  |                    | 1                        |                 | 1                           | 1                 | 1                  |
| 47         | 57                   | 0.0286                  | 1                  |                          | 1               |                             | 1                 |                    |
| 48         | 14                   | 0.0070                  | 1                  |                          |                 | 1                           |                   |                    |
| 49         | 8                    | 0.0040                  |                    |                          | 1               |                             |                   | 1                  |
| 50         | 8                    | 0.0040                  | 1                  | 1                        | 1               |                             |                   |                    |
| 51         | 22                   | 0.0110                  | 1                  |                          |                 |                             | 1                 | 1                  |
| 52         | 8                    | 0.0040                  | 1                  | 1                        |                 | 1                           |                   | 1                  |
| 53         | 5                    | 0.0025                  |                    | 1                        | 1               |                             |                   |                    |
| 54         | 2                    | 0.0010                  | 1                  |                          |                 | 1                           |                   | 1                  |
| 55         | 55                   | 0.0276                  |                    |                          |                 | 1                           |                   |                    |
| 56         | 3                    | 0.0015                  |                    | 1                        |                 | 1                           |                   | 1                  |
| 57         | 20                   | 0.0100                  | 1                  | 1                        |                 | 1                           | 1                 | 1                  |
| 58         | 3                    | 0.0015                  |                    | 1                        |                 |                             | 1                 | 1                  |
| 59         | 16                   | 0.0080                  |                    |                          |                 |                             | 1                 | 1                  |
| 60         | 3                    | 0.0015                  |                    | 1                        | 1               |                             | 1                 | 1                  |
| <b>Sum</b> | <b>1995</b>          |                         |                    |                          |                 |                             |                   |                    |

### Cluster 1

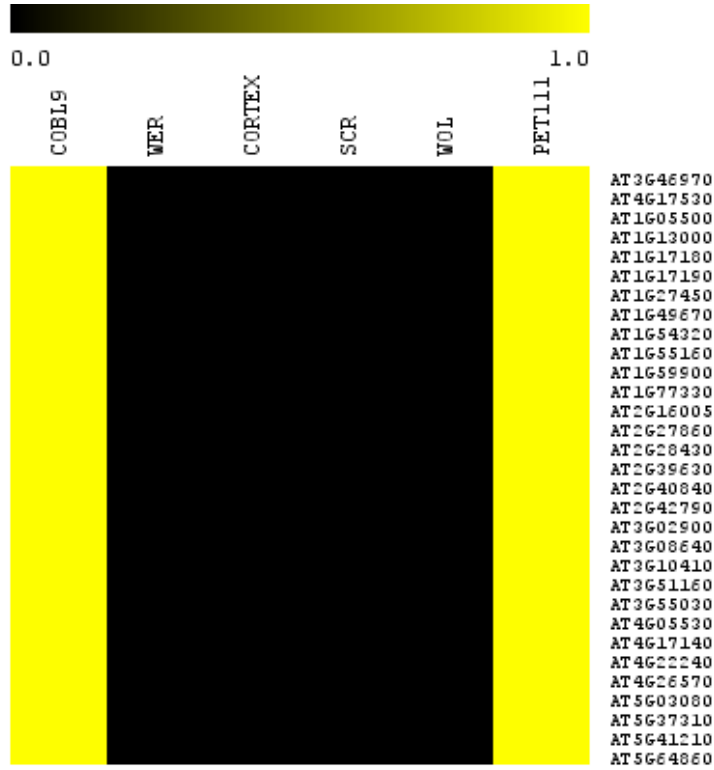

| Cluster 1 |
|-----------|
| AT1G05500 |
| AT1G13000 |
| AT1G17180 |
| AT1G17190 |
| AT1G27450 |
| AT1G49670 |
| AT1G54320 |
| AT1G55160 |
| AT1G59900 |
| AT1G77330 |
| AT2G16005 |
| AT2G27860 |
| AT2G28430 |
| AT2G39630 |
| AT2G40840 |
| AT2G42790 |
| AT3G02900 |
| AT3G08640 |
| AT3G10410 |
| AT3G46970 |
| AT3G51160 |
| AT3G55030 |
| AT4G05530 |
| AT4G17140 |
| AT4G17530 |
| AT4G22240 |
| AT4G26570 |
| AT5G03080 |
| AT5G37310 |
| AT5G41210 |
| AT5G64860 |

| Cluster 1<br>GO identifier | Description                                                                | #<br>Associated<br>to the GO<br>in Cluster | Total # in<br>Cluster | p-value     |
|----------------------------|----------------------------------------------------------------------------|--------------------------------------------|-----------------------|-------------|
| GO:0004134                 | 4-alpha-glucanotransferase activity                                        | 2                                          | 31                    | 2.14E-06    |
| GO:0005777                 | peroxisome                                                                 | 4                                          | 31                    | 2.08E-05    |
| GO:0009407                 | toxin catabolic process                                                    | 3                                          | 31                    | 3.01E-05    |
| GO:0004364                 | glutathione transferase activity                                           | 3                                          | 31                    | 3.73E-05    |
| GO:0005983                 | starch catabolic process                                                   | 2                                          | 31                    | 1.64E-04    |
| GO:0000025                 | maltose catabolic process                                                  | 1                                          | 31                    | 0.001486454 |
| GO:0005976                 | polysaccharide metabolic process                                           | 1                                          | 31                    | 0.001486454 |
| GO:0009635                 | response to herbicide                                                      | 1                                          | 31                    | 0.001486454 |
| GO:0042351                 | 'de novo' GDP-L-fucose biosynthetic process                                | 1                                          | 31                    | 0.001486454 |
| GO:0005829                 | cytosol                                                                    | 3                                          | 31                    | 0.001972938 |
| GO:0000023                 | maltose metabolic process                                                  | 1                                          | 31                    | 0.002968631 |
| GO:0004645                 | phosphorylase activity                                                     | 1                                          | 31                    | 0.002968631 |
| GO:0008444                 | CDP-diacylglycerol-glycerol-3-phosphate 3-phosphatidyltransferase activity | 1                                          | 31                    | 0.002968631 |
| GO:0008446                 | GDP-mannose 4,6-dehydratase activity                                       | 1                                          | 31                    | 0.002968631 |
| GO:0010297                 | heteroglycan binding                                                       | 1                                          | 31                    | 0.002968631 |
| GO:0017169                 | CDP-alcohol phosphatidyltransferase activity                               | 1                                          | 31                    | 0.002968631 |
| GO:0005773                 | vacuole                                                                    | 4                                          | 31                    | 0.00355759  |
| GO:0046686                 | response to cadmium ion                                                    | 3                                          | 31                    | 0.00726192  |
| GO:0003999                 | adenine phosphoribosyltransferase activity                                 | 1                                          | 31                    | 0.007389592 |
| GO:0004108                 | citrate (S1)-synthase activity                                             | 1                                          | 31                    | 0.007389592 |
| GO:0006168                 | adenine salvage                                                            | 1                                          | 31                    | 0.007389592 |
| GO:0004739                 | pyruvate dehydrogenase (acetyl-transferring) activity                      | 1                                          | 31                    | 0.008854752 |
| GO:0005513                 | detection of calcium ion                                                   | 1                                          | 31                    | 0.010315679 |
| GO:0006099                 | tricarboxylic acid cycle                                                   | 1                                          | 31                    | 0.014673155 |
| GO:0009536                 | plastid                                                                    | 2                                          | 31                    | 0.014996436 |
| GO:0005739                 | mitochondrion                                                              | 4                                          | 31                    | 0.021030147 |
| GO:0005737                 | cytoplasm                                                                  | 3                                          | 31                    | 0.021183187 |
| GO:0008654                 | phospholipid biosynthetic process                                          | 1                                          | 31                    | 0.033122087 |
| GO:0005792                 | microsome                                                                  | 1                                          | 31                    | 0.034512405 |
| GO:0006635                 | fatty acid beta-oxidation                                                  | 1                                          | 31                    | 0.034512405 |
| GO:0016491                 | oxidoreductase activity                                                    | 2                                          | 31                    | 0.03974036  |
| GO:0009505                 | plant-type cell wall                                                       | 2                                          | 31                    | 0.043344372 |
| GO:0006486                 | protein amino acid glycosylation                                           | 1                                          | 31                    | 0.044130994 |
| GO:0016757                 | transferase activity, transferring glycosyl groups                         | 2                                          | 31                    | 0.062163769 |
| GO:0007264                 | small GTPase mediated signal transduction                                  | 1                                          | 31                    | 0.084401491 |
| GO:0009941                 | chloroplast envelope                                                       | 2                                          | 31                    | 0.087073253 |
| GO:0009826                 | unidimensional cell growth                                                 | 1                                          | 31                    | 0.104935291 |
| GO:0009058                 | biosynthetic process                                                       | 1                                          | 31                    | 0.109613019 |
| GO:0015031                 | protein transport                                                          | 1                                          | 31                    | 0.109613019 |
| GO:0008150                 | biological_process                                                         | 11                                         | 31                    | 0.131914317 |
| GO:0005886                 | plasma membrane                                                            | 4                                          | 31                    | 0.135798129 |
| GO:0009507                 | chloroplast                                                                | 5                                          | 31                    | 0.136863239 |
| GO:0003674                 | molecular_function                                                         | 9                                          | 31                    | 0.14124941  |
| GO:0008152                 | metabolic process                                                          | 2                                          | 31                    | 0.151686486 |
| GO:0005794                 | Golgi apparatus                                                            | 1                                          | 31                    | 0.158386534 |
| GO:0009414                 | response to water deprivation                                              | 1                                          | 31                    | 0.166346613 |
| GO:0016020                 | membrane                                                                   | 3                                          | 31                    | 0.185092935 |
| GO:0005509                 | calcium ion binding                                                        | 1                                          | 31                    | 0.189009512 |
| GO:0005525                 | GTP binding                                                                | 1                                          | 31                    | 0.202277795 |
| GO:0009409                 | response to cold                                                           | 1                                          | 31                    | 0.213240362 |
| GO:0006979                 | response to oxidative stress                                               | 1                                          | 31                    | 0.216515556 |
| GO:0016021                 | integral to membrane                                                       | 1                                          | 31                    | 0.259764834 |
| GO:0005783                 | endoplasmic reticulum                                                      | 1                                          | 31                    | 0.268714086 |

| Cluster 1<br>GO identifier<br>(con.) | Description        | #<br>Associated<br>to the GO<br>in Cluster | Total # in<br>Cluster | p-value     |
|--------------------------------------|--------------------|--------------------------------------------|-----------------------|-------------|
| GO:0006508                           | proteolysis        | 1                                          | 31                    | 0.307611521 |
| GO:0003824                           | catalytic activity | 1                                          | 31                    | 0.321801347 |
| GO:0005622                           | intracellular      | 1                                          | 31                    | 0.329031298 |

### Cluster 1

| <u>GO Identifier</u> | <u>#Loci</u> | <u>Associated Loci (Left to Right)</u> |           |           |           |           |           |
|----------------------|--------------|----------------------------------------|-----------|-----------|-----------|-----------|-----------|
| GO:0000023           | 1            | AT2G40840                              |           |           |           |           |           |
| GO:0000025           | 1            | AT2G40840                              |           |           |           |           |           |
| GO:0003674           | 9            | AT1G05500                              | AT1G13000 | AT1G55160 | AT1G77330 | AT2G16005 | AT2G28430 |
|                      |              | AT3G02900                              | AT3G08640 | AT4G17140 |           |           |           |
| GO:0003824           | 1            | AT5G03080                              |           |           |           |           |           |
| GO:0003999           | 1            | AT1G27450                              |           |           |           |           |           |
| GO:0004108           | 1            | AT2G42790                              |           |           |           |           |           |
| GO:0004134           | 2            | AT2G40840                              | AT5G64860 |           |           |           |           |
| GO:0004364           | 3            | AT1G17180                              | AT1G17190 | AT5G41210 |           |           |           |
| GO:0004645           | 1            | AT3G46970                              |           |           |           |           |           |
| GO:0004739           | 1            | AT1G59900                              |           |           |           |           |           |
| GO:0005509           | 1            | AT4G26570                              |           |           |           |           |           |
| GO:0005513           | 1            | AT4G26570                              |           |           |           |           |           |
| GO:0005525           | 1            | AT4G17530                              |           |           |           |           |           |
| GO:0005622           | 1            | AT3G51160                              |           |           |           |           |           |
| GO:0005737           | 3            | AT1G17180                              | AT1G17190 | AT5G41210 |           |           |           |
| GO:0005739           | 4            | AT1G49670                              | AT1G55160 | AT1G59900 | AT3G08640 |           |           |
| GO:0005773           | 4            | AT3G10410                              | AT4G17140 | AT4G17530 | AT4G26570 |           |           |
| GO:0005777           | 4            | AT1G49670                              | AT2G42790 | AT4G05530 | AT5G41210 |           |           |
| GO:0005783           | 1            | AT2G39630                              |           |           |           |           |           |
| GO:0005792           | 1            | AT3G55030                              |           |           |           |           |           |
| GO:0005794           | 1            | AT5G37310                              |           |           |           |           |           |
| GO:0005829           | 3            | AT1G27450                              | AT2G40840 | AT3G46970 |           |           |           |
| GO:0005886           | 4            | AT1G05500                              | AT1G27450 | AT4G17530 | AT4G26570 |           |           |
| GO:0005976           | 1            | AT2G40840                              |           |           |           |           |           |
| GO:0005983           | 2            | AT2G40840                              | AT5G64860 |           |           |           |           |
| GO:0006099           | 1            | AT2G42790                              |           |           |           |           |           |
| GO:0006168           | 1            | AT1G27450                              |           |           |           |           |           |
| GO:0006486           | 1            | AT2G39630                              |           |           |           |           |           |
| GO:0006508           | 1            | AT3G10410                              |           |           |           |           |           |
| GO:0006635           | 1            | AT2G42790                              |           |           |           |           |           |
| GO:0006979           | 1            | AT1G49670                              |           |           |           |           |           |
| GO:0007264           | 1            | AT4G17530                              |           |           |           |           |           |
| GO:0008150           | 11           | AT1G05500                              | AT1G13000 | AT1G54320 | AT1G55160 | AT1G77330 | AT2G16005 |
|                      |              | AT2G28430                              | AT3G02900 | AT3G08640 | AT4G17140 | AT5G03080 |           |
|                      |              | AT1G49670                              | AT1G59900 |           |           |           |           |
| GO:0008152           | 2            | AT1G49670                              | AT1G59900 |           |           |           |           |
| GO:0008444           | 1            | AT3G55030                              |           |           |           |           |           |
| GO:0008446           | 1            | AT3G51160                              |           |           |           |           |           |
| GO:0008654           | 1            | AT3G55030                              |           |           |           |           |           |
| GO:0009058           | 1            | AT2G39630                              |           |           |           |           |           |
| GO:0009407           | 3            | AT1G17180                              | AT1G17190 | AT5G41210 |           |           |           |
| GO:0009409           | 1            | AT1G17190                              |           |           |           |           |           |
| GO:0009414           | 1            | AT3G46970                              |           |           |           |           |           |
| GO:0009505           | 2            | AT1G27450                              | AT5G37310 |           |           |           |           |
| GO:0009507           | 5            | AT1G27450                              | AT3G02900 | AT3G08640 | AT3G46970 | AT5G64860 |           |
| GO:0009536           | 2            | AT1G55160                              | AT3G08640 |           |           |           |           |
| GO:0009635           | 1            | AT1G17190                              |           |           |           |           |           |
| GO:0009826           | 1            | AT3G51160                              |           |           |           |           |           |
| GO:0009941           | 2            | AT3G08640                              | AT3G55030 |           |           |           |           |
| GO:0010297           | 1            | AT2G40840                              |           |           |           |           |           |
| GO:0015031           | 1            | AT4G17530                              |           |           |           |           |           |



**Cluster 1 (con.)**

| <b>GO Identifier</b> | <b>#Loci</b> | <b>Associated Loci (Left to Right)</b> |           |           |
|----------------------|--------------|----------------------------------------|-----------|-----------|
| GO:0016020           | 3            | AT1G54320                              | AT4G17530 | AT5G03080 |
| GO:0016021           | 1            | AT5G37310                              |           |           |
| GO:0016491           | 2            | AT1G49670                              | AT4G05530 |           |
| GO:0016757           | 2            | AT2G39630                              | AT3G46970 |           |
| GO:0017169           | 1            | AT3G55030                              |           |           |
| GO:0042351           | 1            | AT3G51160                              |           |           |
| GO:0046686           | 3            | AT1G27450                              | AT1G59900 | AT3G46970 |

**Cluster 2**

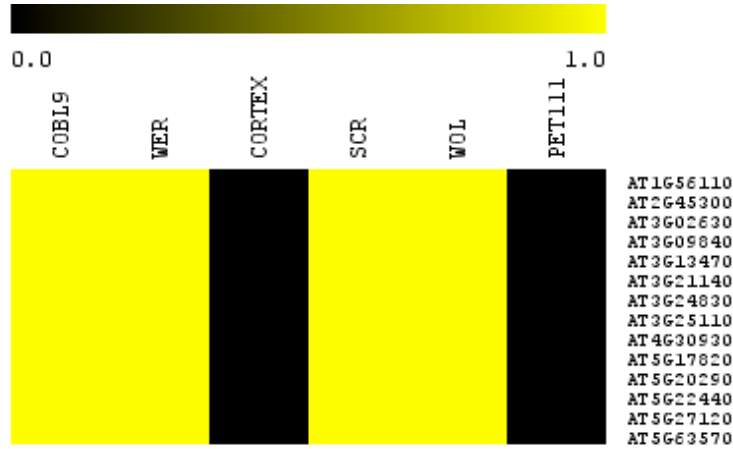

| <b>Cluster 2</b> |
|------------------|
| AT1G56110        |
| AT2G45300        |
| AT3G02630        |
| AT3G09840        |
| AT3G13470        |
| AT3G21140        |
| AT3G24830        |
| AT3G25110        |
| AT4G30930        |
| AT5G17820        |
| AT5G20290        |
| AT5G22440        |
| AT5G27120        |
| AT5G63570        |

| Cluster 2<br>GO identifier | Description                                       | # Associated<br>to the GO in<br>Cluster | Total # in<br>Cluster | p-value     |
|----------------------------|---------------------------------------------------|-----------------------------------------|-----------------------|-------------|
| GO:0022626                 | cytosolic ribosome                                | 5                                       | 14                    | 5.79E-08    |
| GO:0005730                 | nucleolus                                         | 5                                       | 14                    | 3.36E-07    |
| GO:0003735                 | structural constituent of ribosome                | 4                                       | 14                    | 2.94E-05    |
| GO:0006412                 | translation                                       | 4                                       | 14                    | 3.46E-05    |
| GO:0005618                 | cell wall                                         | 4                                       | 14                    | 3.79E-05    |
| GO:0005840                 | ribosome                                          | 3                                       | 14                    | 2.23E-04    |
| GO:0006633                 | fatty acid biosynthetic process                   | 2                                       | 14                    | 4.41E-04    |
| GO:0000741                 | karyogamy                                         | 1                                       | 14                    | 6.71E-04    |
| GO:0016297                 | acyl-[acyl-carrier-protein] hydrolase activity    | 1                                       | 14                    | 0.001341767 |
| GO:0042286                 | glutamate-1-semialdehyde 2,1-aminomutase activity | 1                                       | 14                    | 0.001341767 |
| GO:0009570                 | chloroplast stroma                                | 3                                       | 14                    | 0.001464654 |
| GO:0022625                 | cytosolic large ribosomal subunit                 | 2                                       | 14                    | 0.001957586 |

| Cluster 2<br>GO identifier<br>(con.) | Description                                         | # Associated<br>to the GO in<br>Cluster | Total # in<br>Cluster | p-value     |
|--------------------------------------|-----------------------------------------------------|-----------------------------------------|-----------------------|-------------|
| GO:0042802                           | identical protein binding                           | 1                                       | 14                    | 0.002680189 |
| GO:0045300                           | acyl-[acyl-carrier-protein] desaturase activity     | 1                                       | 14                    | 0.003348147 |
| GO:0000036                           | acyl carrier activity                               | 1                                       | 14                    | 6.01E-03    |
| GO:0044267                           | cellular protein metabolic process                  | 1                                       | 14                    | 0.007338407 |
| GO:0010181                           | FMN binding                                         | 1                                       | 14                    | 0.008000542 |
| GO:0006779                           | porphyrin biosynthetic process                      | 1                                       | 14                    | 0.009322325 |
| GO:0005635                           | nuclear envelope                                    | 1                                       | 14                    | 0.011298796 |
| GO:0009507                           | chloroplast                                         | 5                                       | 14                    | 0.01215598  |
| GO:0051301                           | cell division                                       | 1                                       | 14                    | 0.013267837 |
| GO:0009567                           | double fertilization forming a zygote and endosperm | 1                                       | 14                    | 0.013922536 |
| GO:0005819                           | spindle                                             | 1                                       | 14                    | 0.014576413 |
| GO:0016310                           | phosphorylation                                     | 1                                       | 14                    | 0.014576413 |
| GO:0009846                           | pollen germination                                  | 1                                       | 14                    | 0.016533115 |
| GO:0009553                           | embryo sac development                              | 1                                       | 14                    | 0.017833483 |
| GO:0015934                           | large ribosomal subunit                             | 1                                       | 14                    | 0.022359031 |
| GO:0009941                           | chloroplast envelope                                | 2                                       | 14                    | 0.023070357 |
| GO:0009524                           | phragmoplast                                        | 1                                       | 14                    | 0.024286337 |
| GO:0009860                           | pollen tube growth                                  | 1                                       | 14                    | 0.026844723 |
| GO:0009555                           | pollen development                                  | 1                                       | 14                    | 0.034442451 |
| GO:0004601                           | peroxidase activity                                 | 1                                       | 14                    | 4.25E-02    |
| GO:0016020                           | membrane                                            | 3                                       | 14                    | 0.046086677 |
| GO:0022627                           | cytosolic small ribosomal subunit                   | 1                                       | 14                    | 0.051117931 |
| GO:0042254                           | ribosome biogenesis                                 | 1                                       | 14                    | 0.058942862 |
| GO:0051082                           | unfolded protein binding                            | 1                                       | 14                    | 0.06310211  |
| GO:0009416                           | response to light stimulus                          | 1                                       | 14                    | 0.067223733 |
| GO:0016887                           | ATPase activity                                     | 1                                       | 14                    | 0.071307963 |
| GO:0005739                           | mitochondrion                                       | 2                                       | 14                    | 0.078809008 |
| GO:0006979                           | response to oxidative stress                        | 1                                       | 14                    | 0.114355257 |
| GO:0006457                           | protein folding                                     | 1                                       | 14                    | 0.120588075 |
| GO:0009505                           | plant-type cell wall                                | 1                                       | 14                    | 0.137703646 |
| GO:0048046                           | apoplast                                            | 1                                       | 14                    | 0.139175791 |
| GO:0046686                           | response to cadmium ion                             | 1                                       | 14                    | 0.156835983 |
| GO:0005886                           | plasma membrane                                     | 2                                       | 14                    | 0.214272038 |
| GO:0005737                           | cytoplasm                                           | 1                                       | 14                    | 0.21804863  |
| GO:0005634                           | nucleus                                             | 2                                       | 14                    | 0.218872119 |
| GO:0005524                           | ATP binding                                         | 1                                       | 14                    | 0.28263921  |
| GO:0005515                           | protein binding                                     | 1                                       | 14                    | 3.73E-01    |

## Cluster 2

| <u>GO Identifier</u> | <u>#Loci</u> | <u>Associated Loci (Left to Right)</u> |           |           |           |           |
|----------------------|--------------|----------------------------------------|-----------|-----------|-----------|-----------|
| GO:0000036           | 1            | AT3G25110                              |           |           |           |           |
| GO:0000741           | 1            | AT4G30930                              |           |           |           |           |
| GO:0003735           | 4            | AT3G24830                              | AT4G30930 | AT5G20290 | AT5G22440 |           |
| GO:0004601           | 1            | AT5G17820                              |           |           |           |           |
| GO:0005515           | 1            | AT3G13470                              |           |           |           |           |
| GO:0005524           | 1            | AT3G13470                              |           |           |           |           |
| GO:0005618           | 4            | AT1G56110                              | AT3G09840 | AT5G17820 | AT5G20290 |           |
| GO:0005634           | 2            | AT3G09840                              | AT3G13470 |           |           |           |
| GO:0005635           | 1            | AT3G09840                              |           |           |           |           |
| GO:0005730           | 5            | AT1G56110                              | AT3G09840 | AT3G13470 | AT5G20290 | AT5G22440 |
| GO:0005737           | 1            | AT3G09840                              |           |           |           |           |
| GO:0005739           | 2            | AT3G13470                              | AT4G30930 |           |           |           |
| GO:0005819           | 1            | AT3G09840                              |           |           |           |           |
| GO:0005840           | 3            | AT4G30930                              | AT5G20290 | AT5G22440 |           |           |
| GO:0005886           | 2            | AT3G09840                              | AT5G20290 |           |           |           |
| GO:0006412           | 4            | AT3G24830                              | AT4G30930 | AT5G20290 | AT5G22440 |           |

**Cluster 2 (con.)**

| <b>GO Identifier</b> | <b>#Loci</b> | <b>Associated Loci (Left to Right)</b> |           |           |           |           |  |
|----------------------|--------------|----------------------------------------|-----------|-----------|-----------|-----------|--|
| GO:0006457           | 1            | AT3G13470                              |           |           |           |           |  |
| GO:0006633           | 2            | AT3G02630                              | AT3G25110 |           |           |           |  |
| GO:0006779           | 1            | AT5G63570                              |           |           |           |           |  |
| GO:0006979           | 1            | AT5G17820                              |           |           |           |           |  |
| GO:0009416           | 1            | AT5G63570                              |           |           |           |           |  |
| GO:0009505           | 1            | AT5G17820                              |           |           |           |           |  |
| GO:0009507           | 5            | AT3G02630                              | AT3G13470 | AT3G21140 | AT5G20290 | AT5G63570 |  |
| GO:0009524           | 1            | AT3G09840                              |           |           |           |           |  |
| GO:0009553           | 1            | AT4G30930                              |           |           |           |           |  |
| GO:0009555           | 1            | AT4G30930                              |           |           |           |           |  |
| GO:0009567           | 1            | AT4G30930                              |           |           |           |           |  |
| GO:0009570           | 3            | AT3G02630                              | AT3G13470 | AT5G63570 |           |           |  |
| GO:0009846           | 1            | AT3G09840                              |           |           |           |           |  |
| GO:0009860           | 1            | AT3G09840                              |           |           |           |           |  |
| GO:0009941           | 2            | AT3G13470                              | AT5G63570 |           |           |           |  |
| GO:0010181           | 1            | AT3G21140                              |           |           |           |           |  |
| GO:0015934           | 1            | AT3G24830                              |           |           |           |           |  |
| GO:0016020           | 3            | AT3G24830                              | AT5G17820 | AT5G20290 |           |           |  |
| GO:0016297           | 1            | AT3G25110                              |           |           |           |           |  |
| GO:0016310           | 1            | AT3G09840                              |           |           |           |           |  |
| GO:0016887           | 1            | AT3G09840                              |           |           |           |           |  |
| GO:0022625           | 2            | AT3G24830                              | AT5G22440 |           |           |           |  |
| GO:0022626           | 5            | AT3G09840                              | AT3G13470 | AT3G24830 | AT5G20290 | AT5G22440 |  |
| GO:0022627           | 1            | AT5G20290                              |           |           |           |           |  |
| GO:0042254           | 1            | AT5G20290                              |           |           |           |           |  |
| GO:0042286           | 1            | AT5G63570                              |           |           |           |           |  |
| GO:0042802           | 1            | AT3G09840                              |           |           |           |           |  |
| GO:0044267           | 1            | AT3G13470                              |           |           |           |           |  |
| GO:0045300           | 1            | AT3G02630                              |           |           |           |           |  |
| GO:0046686           | 1            | AT3G09840                              |           |           |           |           |  |
| GO:0048046           | 1            | AT5G63570                              |           |           |           |           |  |
| GO:0051082           | 1            | AT3G13470                              |           |           |           |           |  |
| GO:0051301           | 1            | AT3G09840                              |           |           |           |           |  |

**Cluster 3**

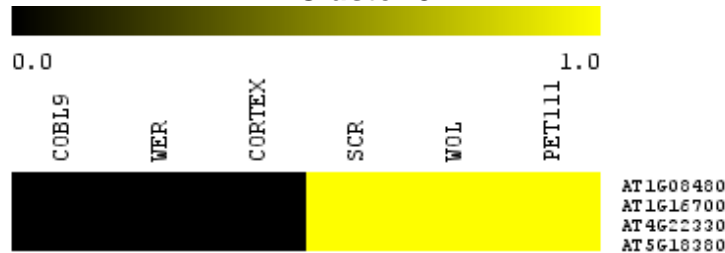

| <b>Cluster 3</b> |
|------------------|
| AT1G08480        |
| AT1G16700        |
| AT4G22330        |
| AT5G18380        |

| Cluster 3<br>GO identifier | Description                | # Associated<br>to the GO in<br>Cluster | Total # in<br>Cluster | p-value     |
|----------------------------|----------------------------|-----------------------------------------|-----------------------|-------------|
| GO:0006672                 | ceramide metabolic process | 1                                       | 4                     | 1.92E-04    |
| GO:0009536                 | plastid                    | 1                                       | 4                     | 0.024474187 |
| GO:0005783                 | endoplasmic reticulum      | 1                                       | 4                     | 0.048921054 |
| GO:0003824                 | catalytic activity         | 1                                       | 4                     | 0.067265162 |

| Cluster 3<br>GO identifier<br>(con.) | Description     | # Associated<br>to the GO in<br>Cluster | Total # in<br>Cluster | p-value     |
|--------------------------------------|-----------------|-----------------------------------------|-----------------------|-------------|
| GO:0005773                           | vacuole         | 1                                       | 4                     | 0.079678425 |
| GO:0005739                           | mitochondrion   | 1                                       | 4                     | 0.131791079 |
| GO:0016020                           | membrane        | 1                                       | 4                     | 0.209989764 |
| GO:0005886                           | plasma membrane | 1                                       | 4                     | 0.249279127 |

### Cluster 3

| GO Identifier | #Loci | Associated Loci (Left to Right) |
|---------------|-------|---------------------------------|
| GO:0003824    | 1     | AT4G22330                       |
| GO:0005739    | 1     | AT1G08480                       |
| GO:0005773    | 1     | AT1G08480                       |
| GO:0005783    | 1     | AT4G22330                       |
| GO:0005886    | 1     | AT1G08480                       |
| GO:0006672    | 1     | AT4G22330                       |
| GO:0009536    | 1     | AT1G08480                       |
| GO:0016020    | 1     | AT4G22330                       |

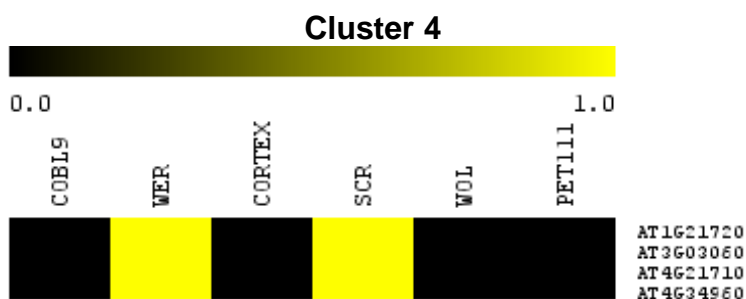

**Cluster 4**  
 AT1G21720  
 AT3G03060  
 AT4G21710  
 AT4G34960

| Cluster 4<br>GO identifier | Description                                   | #<br>Associated<br>to the GO<br>in Cluster | Total # in<br>Cluster | p-value     |
|----------------------------|-----------------------------------------------|--------------------------------------------|-----------------------|-------------|
| GO:0016591                 | DNA-directed RNA polymerase II, holoenzyme    | 1                                          | 4                     | 3.84E-04    |
| GO:0005839                 | proteasome core complex                       | 1                                          | 4                     | 0.003825535 |
| GO:0003899                 | DNA-directed RNA polymerase activity          | 1                                          | 4                     | 0.008576504 |
| GO:0008233                 | peptidase activity                            | 1                                          | 4                     | 0.008765829 |
| GO:0006350                 | transcription                                 | 1                                          | 4                     | 0.009144315 |
| GO:0003755                 | peptidyl-prolyl cis-trans isomerase activity  | 1                                          | 4                     | 0.010278457 |
| GO:0016887                 | ATPase activity                               | 1                                          | 4                     | 0.021511727 |
| GO:0005794                 | Golgi apparatus                               | 1                                          | 4                     | 0.024104638 |
| GO:0006511                 | ubiquitin-dependent protein catabolic process | 1                                          | 4                     | 0.035460181 |
| GO:0006457                 | protein folding                               | 1                                          | 4                     | 0.037995705 |
| GO:0009505                 | plant-type cell wall                          | 1                                          | 4                     | 0.044109724 |
| GO:0009793                 | embryonic development ending in seed dormancy | 1                                          | 4                     | 0.051400566 |
| GO:0005618                 | cell wall                                     | 1                                          | 4                     | 0.055627004 |
| GO:0003677                 | DNA binding                                   | 1                                          | 4                     | 0.177307869 |
| GO:0005886                 | plasma membrane                               | 1                                          | 4                     | 0.249279127 |

### Cluster 4

| GO Identifier | #Loci | Associated Loci (Left to Right) |
|---------------|-------|---------------------------------|
| GO:0003677    | 1     | AT4G21710                       |
| GO:0003755    | 1     | AT4G34960                       |

**Cluster 4 (con.)**

| <b><u>GO Identifier</u></b> | <b><u>#Loci</u></b> | <b><u>Associated Loci (Left to Right)</u></b> |
|-----------------------------|---------------------|-----------------------------------------------|
| GO:0003899                  | 1                   | AT4G21710                                     |
| GO:0005618                  | 1                   | AT3G03060                                     |
| GO:0005794                  | 1                   | AT4G34960                                     |
| GO:0005839                  | 1                   | AT1G21720                                     |
| GO:0005886                  | 1                   | AT1G21720                                     |
| GO:0006350                  | 1                   | AT4G21710                                     |
| GO:0006457                  | 1                   | AT4G34960                                     |
| GO:0006511                  | 1                   | AT1G21720                                     |
| GO:0008233                  | 1                   | AT1G21720                                     |
| GO:0009505                  | 1                   | AT3G03060                                     |
| GO:0009793                  | 1                   | AT4G21710                                     |
| GO:0016591                  | 1                   | AT4G21710                                     |
| GO:0016887                  | 1                   | AT3G03060                                     |

# Cluster 5

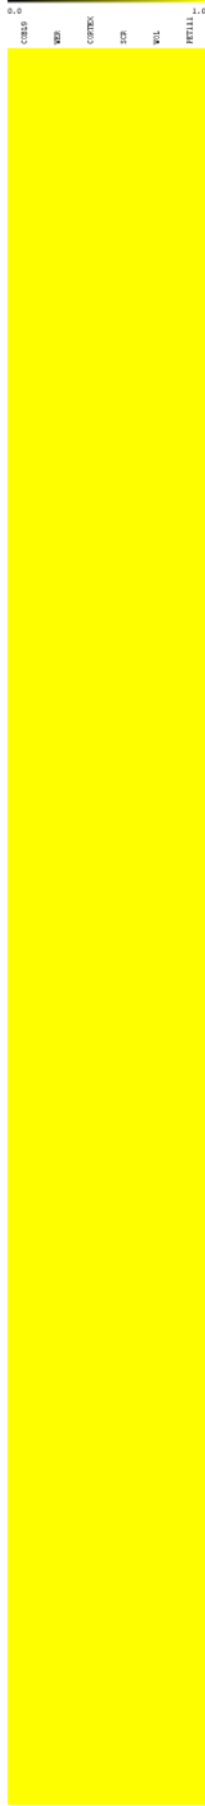

**Cluster 5**

|           |           |           |           |           |
|-----------|-----------|-----------|-----------|-----------|
| AT1G01090 | AT2G01140 | AT3G01120 | AT4G01100 | AT5G02500 |
| AT1G03860 | AT2G05710 | AT3G01280 | AT4G02580 | AT5G02740 |
| AT1G04410 | AT2G05990 | AT3G02090 | AT4G02930 | AT5G03630 |
| AT1G06290 | AT2G07050 | AT3G02230 | AT4G05020 | AT5G04590 |
| AT1G06950 | AT2G14170 | AT3G03250 | AT4G08390 | AT5G07440 |
| AT1G09210 | AT2G17420 | AT3G04830 | AT4G09000 | AT5G08160 |
| AT1G10950 | AT2G18020 | AT3G04840 | AT4G09320 | AT5G08300 |
| AT1G11860 | AT2G18960 | AT3G05230 | AT4G11010 | AT5G08530 |
| AT1G11910 | AT2G20360 | AT3G07770 | AT4G11150 | AT5G09590 |
| AT1G12230 | AT2G20420 | AT3G08580 | AT4G12650 | AT5G10160 |
| AT1G12840 | AT2G20530 | AT3G09260 | AT4G13430 | AT5G10840 |
| AT1G13280 | AT2G21170 | AT3G10920 | AT4G13930 | AT5G11560 |
| AT1G14810 | AT2G21660 | AT3G11130 | AT4G13940 | AT5G11770 |
| AT1G15500 | AT2G21870 | AT3G12260 | AT4G16660 | AT5G11880 |
| AT1G15690 | AT2G22780 | AT3G12780 | AT4G18030 | AT5G12470 |
| AT1G17290 | AT2G24200 | AT3G13160 | AT4G20850 | AT5G13420 |
| AT1G19360 | AT2G26080 | AT3G13860 | AT4G21150 | AT5G13450 |
| AT1G20330 | AT2G26230 | AT3G13930 | AT4G24190 | AT5G13490 |
| AT1G21750 | AT2G27530 | AT3G15020 | AT4G24330 | AT5G13710 |
| AT1G22300 | AT2G28000 | AT3G15090 | AT4G24620 | AT5G14030 |
| AT1G24180 | AT2G30200 | AT3G15950 | AT4G26410 | AT5G14040 |
| AT1G24360 | AT2G30490 | AT3G16480 | AT4G28510 | AT5G15090 |
| AT1G26850 | AT2G30970 | AT3G16950 | AT4G29130 | AT5G15650 |
| AT1G29470 | AT2G31390 | AT3G17240 | AT4G29520 | AT5G17770 |
| AT1G29900 | AT2G32920 | AT3G19820 | AT4G29840 | AT5G17920 |
| AT1G30510 | AT2G33040 | AT3G20000 | AT4G31340 | AT5G18170 |
| AT1G34130 | AT2G33150 | AT3G22200 | AT4G31990 | AT5G19690 |
| AT1G34430 | AT2G33210 | AT3G22960 | AT4G33090 | AT5G19760 |
| AT1G35620 | AT2G34300 | AT3G23940 | AT4G33360 | AT5G20720 |
| AT1G35720 | AT2G36530 | AT3G23990 | AT4G33680 | AT5G23300 |
| AT1G47260 | AT2G38040 | AT3G25860 | AT4G34200 | AT5G23575 |
| AT1G48030 | AT2G39960 | AT3G26520 | AT4G34450 | AT5G26260 |
| AT1G51980 | AT2G41220 | AT3G27240 | AT4G34700 | AT5G27540 |
| AT1G53240 | AT2G43750 | AT3G27380 | AT4G34870 | AT5G28540 |
| AT1G54000 | AT2G44350 | AT3G28715 | AT4G35000 | AT5G33320 |
| AT1G56070 | AT2G45960 | AT3G42050 | AT4G35090 | AT5G34850 |
| AT1G56340 | AT2G47470 | AT3G44330 | AT4G35100 | AT5G35360 |
| AT1G57720 | AT2G47510 | AT3G46740 | AT4G35260 | AT5G35630 |
| AT1G59610 |           | AT3G47520 | AT4G37910 | AT5G37510 |
| AT1G61790 |           | AT3G48000 | AT4G38220 | AT5G40480 |
| AT1G62660 |           | AT3G49720 | AT4G39080 | AT5G40770 |
| AT1G63940 |           | AT3G51260 | AT4G39660 | AT5G40810 |
| AT1G64090 |           | AT3G52300 |           | AT5G41670 |
| AT1G64190 |           | AT3G52930 |           | AT5G42020 |
| AT1G65270 |           | AT3G53520 |           | AT5G42080 |
| AT1G66270 |           | AT3G54110 |           | AT5G42960 |
| AT1G66280 |           | AT3G54960 |           | AT5G43060 |
| AT1G67730 |           | AT3G55410 |           | AT5G46290 |
| AT1G70770 |           | AT3G55440 |           | AT5G50850 |
| AT1G71220 |           | AT3G56070 |           | AT5G51220 |
| AT1G76400 |           | AT3G57610 |           | AT5G52840 |
| AT1G77510 |           | AT3G58610 |           | AT5G53460 |

**Cluster 5**

|           |           |           |
|-----------|-----------|-----------|
| AT1G78900 | AT3G58730 | AT5G53560 |
| AT1G79530 | AT3G59760 | AT5G55070 |
| AT1G79550 | AT3G60750 | AT5G55940 |
| AT1G79750 | AT3G61070 | AT5G56360 |
| AT1G80600 | AT3G62360 | AT5G56500 |
|           | AT3G62830 | AT5G60640 |
|           |           | AT5G61790 |
|           |           | AT5G62530 |
|           |           | AT5G63400 |
|           |           | AT5G63840 |
|           |           | AT5G65020 |
|           |           | AT5G66510 |
|           |           | AT5G66680 |
|           |           | AT5G66760 |
|           |           | AT5G66860 |
|           |           | AT5G67500 |
|           |           | ATMG00070 |
|           |           | ATMG00510 |
|           |           | ATMG00640 |

| Cluster 5<br>GO identifier | Description                                               | #<br>Associated<br>to the GO<br>in Cluster | Total # in<br>Cluster | p-value  |
|----------------------------|-----------------------------------------------------------|--------------------------------------------|-----------------------|----------|
| GO:0005739                 | mitochondrion                                             | 109                                        | 263                   | 2.63E-86 |
| GO:0009507                 | chloroplast                                               | 117                                        | 263                   | 4.42E-43 |
| GO:0046686                 | response to cadmium ion                                   | 49                                         | 263                   | 7.47E-42 |
| GO:0005886                 | plasma membrane                                           | 99                                         | 263                   | 9.14E-42 |
| GO:0005773                 | vacuole                                                   | 49                                         | 263                   | 6.22E-32 |
| GO:0009651                 | response to salt stress                                   | 41                                         | 263                   | 4.31E-31 |
| GO:0016020                 | membrane                                                  | 74                                         | 263                   | 1.88E-28 |
| GO:0005783                 | endoplasmic reticulum                                     | 36                                         | 263                   | 1.09E-26 |
| GO:0009941                 | chloroplast envelope                                      | 38                                         | 263                   | 1.15E-23 |
| GO:0009570                 | chloroplast stroma                                        | 37                                         | 263                   | 2.51E-23 |
| GO:0009536                 | plastid                                                   | 25                                         | 263                   | 1.19E-22 |
| GO:0005618                 | cell wall                                                 | 26                                         | 263                   | 1.31E-14 |
| GO:0045271                 | respiratory chain complex I                               | 12                                         | 263                   | 1.72E-14 |
| GO:0048046                 | apoplast                                                  | 23                                         | 263                   | 4.93E-14 |
| GO:0005524                 | ATP binding                                               | 34                                         | 263                   | 6.05E-13 |
| GO:0003756                 | protein disulfide isomerase activity                      | 7                                          | 263                   | 2.73E-10 |
| GO:0022626                 | cytosolic ribosome                                        | 15                                         | 263                   | 3.07E-09 |
| GO:0009409                 | response to cold                                          | 15                                         | 263                   | 1.51E-08 |
| GO:0006979                 | response to oxidative stress                              | 15                                         | 263                   | 2.00E-08 |
| GO:0005743                 | mitochondrial inner membrane                              | 10                                         | 263                   | 3.21E-08 |
| GO:0016615                 | malate dehydrogenase activity                             | 5                                          | 263                   | 3.68E-08 |
| GO:0005741                 | mitochondrial outer membrane                              | 6                                          | 263                   | 4.10E-08 |
| GO:0046961                 | proton-transporting ATPase activity, rotational mechanism | 6                                          | 263                   | 4.10E-08 |
| GO:0000325                 | plant-type vacuole                                        | 7                                          | 263                   | 4.28E-08 |
| GO:0005759                 | mitochondrial matrix                                      | 7                                          | 263                   | 5.57E-08 |
| GO:0005750                 | mitochondrial respiratory chain complex III               | 5                                          | 263                   | 5.50E-07 |
| GO:0005774                 | vacuolar membrane                                         | 7                                          | 263                   | 5.81E-07 |
| GO:0009853                 | photorespiration                                          | 6                                          | 263                   | 1.36E-06 |
| GO:0008308                 | voltage-gated anion channel activity                      | 4                                          | 263                   | 1.65E-06 |
| GO:0005730                 | nucleolus                                                 | 14                                         | 263                   | 1.76E-06 |
| GO:0006633                 | fatty acid biosynthetic process                           | 7                                          | 263                   | 1.80E-06 |



| Cluster 5<br>GO identifier<br>(con.) | Description                                                                                       | #<br>Associated<br>to the GO<br>in Cluster | Total # in<br>Cluster | p-value     |
|--------------------------------------|---------------------------------------------------------------------------------------------------|--------------------------------------------|-----------------------|-------------|
| GO:0010319                           | stromule                                                                                          | 6                                          | 263                   | 2.05E-06    |
| GO:0031966                           | mitochondrial membrane                                                                            | 5                                          | 263                   | 3.00E-06    |
| GO:0004148                           | dihydrolipoyl dehydrogenase activity                                                              | 3                                          | 263                   | 7.83E-06    |
| GO:0004576                           | oligosaccharyl transferase activity                                                               | 3                                          | 263                   | 7.83E-06    |
| GO:0004742                           | dihydrolipoyllysine-residue acetyltransferase activity                                            | 3                                          | 263                   | 1.93E-05    |
| GO:0005740                           | mitochondrial envelope                                                                            | 4                                          | 263                   | 2.18E-05    |
| GO:0046933                           | hydrogen ion transporting ATP synthase activity, rotational mechanism                             | 4                                          | 263                   | 2.94E-05    |
| GO:0005794                           | Golgi apparatus                                                                                   | 9                                          | 263                   | 3.11E-05    |
| GO:0004739                           | pyruvate dehydrogenase (acetyl-transferring) activity                                             | 3                                          | 263                   | 3.82E-05    |
| GO:0006120                           | mitochondrial electron transport, NADH to ubiquinone                                              | 3                                          | 263                   | 3.82E-05    |
| GO:0009505                           | plant-type cell wall                                                                              | 12                                         | 263                   | 4.17E-05    |
| GO:0006820                           | anion transport                                                                                   | 4                                          | 263                   | 5.00E-05    |
| GO:0009579                           | thylakoid                                                                                         | 10                                         | 263                   | 5.12E-05    |
| GO:0008152                           | metabolic process                                                                                 | 19                                         | 263                   | 6.32E-05    |
| GO:0007005                           | mitochondrion organization                                                                        | 3                                          | 263                   | 6.60E-05    |
| GO:0008137                           | NADH dehydrogenase (ubiquinone) activity                                                          | 3                                          | 263                   | 6.60E-05    |
| GO:0005777                           | peroxisome                                                                                        | 8                                          | 263                   | 7.13E-05    |
| GO:0004353                           | glutamate dehydrogenase [NAD(P)+] activity                                                        | 2                                          | 263                   | 1.58E-04    |
| GO:0004579                           | dolichyl-diphosphooligosaccharide-protein glycotransferase activity                               | 2                                          | 263                   | 1.58E-04    |
| GO:0004801                           | transaldolase activity                                                                            | 2                                          | 263                   | 1.58E-04    |
| GO:0004807                           | triose-phosphate isomerase activity                                                               | 2                                          | 263                   | 1.58E-04    |
| GO:0045153                           | electron transporter, transferring electrons within CoQH2-cytochrome c reductase complex activity | 2                                          | 263                   | 1.58E-04    |
| GO:0009793                           | embryonic development ending in seed dormancy                                                     | 12                                         | 263                   | 1.77E-04    |
| GO:0006096                           | glycolysis                                                                                        | 5                                          | 263                   | 1.84E-04    |
| GO:0006457                           | protein folding                                                                                   | 10                                         | 263                   | 2.18E-04    |
| GO:0042742                           | defense response to bacterium                                                                     | 8                                          | 263                   | 2.53E-04    |
| GO:0015992                           | proton transport                                                                                  | 4                                          | 263                   | 2.81E-04    |
| GO:0004618                           | phosphoglycerate kinase activity                                                                  | 2                                          | 263                   | 4.69E-04    |
| GO:0004776                           | succinate-CoA ligase (GDP-forming) activity                                                       | 2                                          | 263                   | 4.69E-04    |
| GO:0010168                           | ER body                                                                                           | 2                                          | 263                   | 4.69E-04    |
| GO:0015865                           | purine nucleotide transport                                                                       | 2                                          | 263                   | 4.69E-04    |
| GO:0004028                           | 3-chloroallyl aldehyde dehydrogenase activity                                                     | 3                                          | 263                   | 6.29E-04    |
| GO:0015986                           | ATP synthesis coupled proton transport                                                            | 3                                          | 263                   | 6.29E-04    |
| GO:0018119                           | peptidyl-cysteine S-nitrosylation                                                                 | 3                                          | 263                   | 6.29E-04    |
| GO:0005471                           | ATP:ADP antiporter activity                                                                       | 2                                          | 263                   | 9.27E-04    |
| GO:0005746                           | mitochondrial respiratory chain                                                                   | 2                                          | 263                   | 9.27E-04    |
| GO:0006121                           | mitochondrial electron transport, succinate to ubiquinone                                         | 2                                          | 263                   | 9.27E-04    |
| GO:0006537                           | glutamate biosynthetic process                                                                    | 2                                          | 263                   | 9.27E-04    |
| GO:0017077                           | oxidative phosphorylation uncoupler activity                                                      | 2                                          | 263                   | 9.27E-04    |
| GO:0000104                           | succinate dehydrogenase activity                                                                  | 2                                          | 263                   | 9.27E-04    |
| GO:0005829                           | cytosol                                                                                           | 8                                          | 263                   | 0.001221153 |
| GO:0003989                           | acetyl-CoA carboxylase activity                                                                   | 2                                          | 263                   | 0.001525621 |
| GO:0004550                           | nucleoside diphosphate kinase activity                                                            | 2                                          | 263                   | 0.001525621 |
| GO:0006086                           | acetyl-CoA biosynthetic process from pyruvate                                                     | 2                                          | 263                   | 0.001525621 |
| GO:0009082                           | branched chain family amino acid biosynthetic process                                             | 2                                          | 263                   | 0.001525621 |
| GO:0007030                           | Golgi organization                                                                                | 2                                          | 263                   | 0.002259785 |
| GO:0005789                           | endoplasmic reticulum membrane                                                                    | 3                                          | 263                   | 0.002405861 |
| GO:0004069                           | L-aspartate:2-oxoglutarate aminotransferase activity                                              | 2                                          | 263                   | 0.003124094 |
| GO:0004616                           | phosphogluconate dehydrogenase (decarboxylating) activity                                         | 2                                          | 263                   | 0.00411331  |

| Cluster 5<br>GO identifier<br>(con.) | Description                                                            | #<br>Associated<br>to the GO<br>in Cluster | Total # in<br>Cluster | p-value     |
|--------------------------------------|------------------------------------------------------------------------|--------------------------------------------|-----------------------|-------------|
| GO:0005758                           | mitochondrial intermembrane space                                      | 2                                          | 263                   | 0.00411331  |
| GO:0016688                           | L-ascorbate peroxidase activity                                        | 2                                          | 263                   | 0.00411331  |
| GO:0004124                           | cysteine synthase activity                                             | 2                                          | 263                   | 0.00522233  |
| GO:0004332                           | fructose-bisphosphate aldolase activity                                | 2                                          | 263                   | 0.00522233  |
| GO:0009790                           | embryonic development                                                  | 3                                          | 263                   | 0.006271659 |
| GO:0019344                           | cysteine biosynthetic process                                          | 2                                          | 263                   | 0.006446181 |
| GO:0005544                           | calcium-dependent phospholipid binding                                 | 2                                          | 263                   | 0.007780017 |
| GO:0005507                           | copper ion binding                                                     | 5                                          | 263                   | 0.008823277 |
| GO:0009416                           | response to light stimulus                                             | 5                                          | 263                   | 0.009140701 |
| GO:0009658                           | chloroplast organization                                               | 3                                          | 263                   | 0.009355468 |
| GO:0009705                           | plant-type vacuole membrane                                            | 3                                          | 263                   | 0.010779232 |
| GO:0003824                           | catalytic activity                                                     | 10                                         | 263                   | 0.011917932 |
| GO:0006098                           | pentose-phosphate shunt                                                | 2                                          | 263                   | 0.01239485  |
| GO:0000221                           | vacuolar proton-transporting V-type ATPase, V1 domain                  | 1                                          | 263                   | 0.012610885 |
| GO:0000327                           | lytic vacuole within protein storage vacuole                           | 1                                          | 263                   | 0.012610885 |
| GO:0003842                           | 1-pyrroline-5-carboxylate dehydrogenase activity                       | 1                                          | 263                   | 0.012610885 |
| GO:0003867                           | 4-aminobutyrate transaminase activity                                  | 1                                          | 263                   | 0.012610885 |
| GO:0003992                           | N2-acetyl-L-ornithine:2-oxoglutarate 5-aminotransferase activity       | 1                                          | 263                   | 0.012610885 |
| GO:0004019                           | adenylosuccinate synthase activity                                     | 1                                          | 263                   | 0.012610885 |
| GO:0004046                           | aminoacylase activity                                                  | 1                                          | 263                   | 0.012610885 |
| GO:0004073                           | aspartate-semialdehyde dehydrogenase activity                          | 1                                          | 263                   | 0.012610885 |
| GO:0004086                           | carbamoyl-phosphate synthase activity                                  | 1                                          | 263                   | 0.012610885 |
| GO:0004152                           | dihydroorotate dehydrogenase activity                                  | 1                                          | 263                   | 0.012610885 |
| GO:0004314                           | [acyl-carrier-protein] S-malonyltransferase activity                   | 1                                          | 263                   | 0.012610885 |
| GO:0004316                           | 3-oxoacyl-[acyl-carrier-protein] reductase activity                    | 1                                          | 263                   | 0.012610885 |
| GO:0004318                           | enoyl-[acyl-carrier-protein] reductase (NADH) activity                 | 1                                          | 263                   | 0.012610885 |
| GO:0004352                           | glutamate dehydrogenase activity                                       | 1                                          | 263                   | 0.012610885 |
| GO:0004455                           | ketol-acid reductoisomerase activity                                   | 1                                          | 263                   | 0.012610885 |
| GO:0004846                           | urate oxidase activity                                                 | 1                                          | 263                   | 0.012610885 |
| GO:0005835                           | fatty acid synthase complex                                            | 1                                          | 263                   | 0.012610885 |
| GO:0006144                           | purine base metabolic process                                          | 1                                          | 263                   | 0.012610885 |
| GO:0006167                           | AMP biosynthetic process                                               | 1                                          | 263                   | 0.012610885 |
| GO:0006496                           | protein amino acid terminal N-glycosylation                            | 1                                          | 263                   | 0.012610885 |
| GO:0006560                           | proline metabolic process                                              | 1                                          | 263                   | 0.012610885 |
| GO:0006721                           | terpenoid metabolic process                                            | 1                                          | 263                   | 0.012610885 |
| GO:0008240                           | tripeptidyl-peptidase activity                                         | 1                                          | 263                   | 0.012610885 |
| GO:0008250                           | oligosaccharyltransferase complex                                      | 1                                          | 263                   | 0.012610885 |
| GO:0009099                           | valine biosynthetic process                                            | 1                                          | 263                   | 0.012610885 |
| GO:0009317                           | acetyl-CoA carboxylase complex                                         | 1                                          | 263                   | 0.012610885 |
| GO:0010006                           | toc complex                                                            | 1                                          | 263                   | 0.012610885 |
| GO:0010033                           | response to organic substance                                          | 1                                          | 263                   | 0.012610885 |
| GO:0010111                           | glyoxysome organization                                                | 1                                          | 263                   | 0.012610885 |
| GO:0010133                           | proline catabolic process to glutamate                                 | 1                                          | 263                   | 0.012610885 |
| GO:0010248                           | establishment or maintenance of transmembrane electrochemical gradient | 1                                          | 263                   | 0.012610885 |
| GO:0010285                           | L,L-diaminopimelate aminotransferase activity                          | 1                                          | 263                   | 0.012610885 |
| GO:0015774                           | polysaccharide transport                                               | 1                                          | 263                   | 0.012610885 |
| GO:0015926                           | glucosidase activity                                                   | 1                                          | 263                   | 0.012610885 |
| GO:0015928                           | fucosidase activity                                                    | 1                                          | 263                   | 0.012610885 |
| GO:0016002                           | sulfite reductase activity                                             | 1                                          | 263                   | 0.012610885 |
| GO:0016018                           | cyclosporin A binding                                                  | 1                                          | 263                   | 0.012610885 |

| Cluster 5<br>GO identifier<br>(con.) | Description                                                                                     | #<br>Associated<br>to the GO<br>in Cluster | Total # in<br>Cluster | p-value     |
|--------------------------------------|-------------------------------------------------------------------------------------------------|--------------------------------------------|-----------------------|-------------|
| GO:0016040                           | glutamate synthase (NADH) activity                                                              | 1                                          | 263                   | 0.012610885 |
| GO:0016631                           | enoyl-[acyl-carrier-protein] reductase activity                                                 | 1                                          | 263                   | 0.012610885 |
| GO:0016710                           | trans-cinnamate 4-monooxygenase activity                                                        | 1                                          | 263                   | 0.012610885 |
| GO:0016871                           | cycloartenol synthase activity                                                                  | 1                                          | 263                   | 0.012610885 |
| GO:0018279                           | protein amino acid N-linked glycosylation via asparagine                                        | 1                                          | 263                   | 0.012610885 |
| GO:0019320                           | hexose catabolic process                                                                        | 1                                          | 263                   | 0.012610885 |
| GO:0019484                           | beta-alanine catabolic process                                                                  | 1                                          | 263                   | 0.012610885 |
| GO:0019676                           | ammonia assimilation cycle                                                                      | 1                                          | 263                   | 0.012610885 |
| GO:0022900                           | electron transport chain                                                                        | 1                                          | 263                   | 0.012610885 |
| GO:0034387                           | 4-aminobutyrate:pyruvate transaminase activity                                                  | 1                                          | 263                   | 0.012610885 |
| GO:0048569                           | post-embryonic organ development                                                                | 1                                          | 263                   | 0.012610885 |
| GO:0050311                           | sulfite reductase (ferredoxin) activity                                                         | 1                                          | 263                   | 0.012610885 |
| GO:0051131                           | chaperone-mediated protein complex assembly                                                     | 1                                          | 263                   | 0.012610885 |
| GO:0004089                           | carbonate dehydratase activity                                                                  | 2                                          | 263                   | 0.014122644 |
| GO:0019575                           | sucrose catabolic process, using beta-fructofuranosidase                                        | 2                                          | 263                   | 0.014122644 |
| GO:0048868                           | pollen tube development                                                                         | 2                                          | 263                   | 0.014122644 |
| GO:0050662                           | coenzyme binding                                                                                | 2                                          | 263                   | 0.014122644 |
| GO:0009826                           | unidimensional cell growth                                                                      | 4                                          | 263                   | 0.014524935 |
| GO:0005488                           | binding                                                                                         | 11                                         | 263                   | 0.014658811 |
| GO:0003746                           | translation elongation factor activity                                                          | 2                                          | 263                   | 0.015938025 |
| GO:0005778                           | peroxisomal membrane                                                                            | 2                                          | 263                   | 0.017836862 |
| GO:0006520                           | amino acid metabolic process                                                                    | 2                                          | 263                   | 0.017836862 |
| GO:0006807                           | nitrogen compound metabolic process                                                             | 2                                          | 263                   | 0.019815133 |
| GO:0009615                           | response to virus                                                                               | 2                                          | 263                   | 0.019815133 |
| GO:0009695                           | jasmonic acid biosynthetic process                                                              | 2                                          | 263                   | 0.019815133 |
| GO:0010051                           | xylem and phloem pattern formation                                                              | 2                                          | 263                   | 0.019815133 |
| GO:0000275                           | mitochondrial proton-transporting ATP synthase complex, catalytic core F(1)                     | 1                                          | 263                   | 0.024904895 |
| GO:0003838                           | sterol 24-C-methyltransferase activity                                                          | 1                                          | 263                   | 0.024904895 |
| GO:0003962                           | cystathionine gamma-synthase activity                                                           | 1                                          | 263                   | 0.024904895 |
| GO:0004013                           | adenosylhomocysteinase activity                                                                 | 1                                          | 263                   | 0.024904895 |
| GO:0004075                           | biotin carboxylase activity                                                                     | 1                                          | 263                   | 0.024904895 |
| GO:0004128                           | cytochrome-b5 reductase activity                                                                | 1                                          | 263                   | 0.024904895 |
| GO:0004347                           | glucose-6-phosphate isomerase activity                                                          | 1                                          | 263                   | 0.024904895 |
| GO:0004591                           | oxoglutarate dehydrogenase (succinyl-transferring) activity                                     | 1                                          | 263                   | 0.024904895 |
| GO:0004795                           | threonine synthase activity                                                                     | 1                                          | 263                   | 0.024904895 |
| GO:0006540                           | glutamate decarboxylation to succinate                                                          | 1                                          | 263                   | 0.024904895 |
| GO:0008422                           | beta-glucosidase activity                                                                       | 1                                          | 263                   | 0.024904895 |
| GO:0009097                           | isoleucine biosynthetic process                                                                 | 1                                          | 263                   | 0.024904895 |
| GO:0009220                           | pyrimidine ribonucleotide biosynthetic process                                                  | 1                                          | 263                   | 0.024904895 |
| GO:0009450                           | gamma-aminobutyric acid catabolic process                                                       | 1                                          | 263                   | 0.024904895 |
| GO:0009865                           | pollen tube adhesion                                                                            | 1                                          | 263                   | 0.024904895 |
| GO:0010501                           | RNA secondary structure unwinding                                                               | 1                                          | 263                   | 0.024904895 |
| GO:0015157                           | oligosaccharide transmembrane transporter activity                                              | 1                                          | 263                   | 0.024904895 |
| GO:0016041                           | glutamate synthase (ferredoxin) activity                                                        | 1                                          | 263                   | 0.024904895 |
| GO:0016620                           | oxidoreductase activity, acting on the aldehyde or oxo group of donors, NAD or NADP as acceptor | 1                                          | 263                   | 0.024904895 |
| GO:0019171                           | 3-hydroxyacyl-[acyl-carrier-protein] dehydratase activity                                       | 1                                          | 263                   | 0.024904895 |
| GO:0019419                           | sulfate reduction                                                                               | 1                                          | 263                   | 0.024904895 |
| GO:0019773                           | proteasome core complex, alpha-subunit complex                                                  | 1                                          | 263                   | 0.024904895 |
| GO:0030104                           | water homeostasis                                                                               | 1                                          | 263                   | 0.024904895 |
| GO:0031998                           | regulation of fatty acid beta-oxidation                                                         | 1                                          | 263                   | 0.024904895 |

| Cluster 5<br>GO identifier<br>(con.) | Description                                                          | #<br>Associated<br>to the GO<br>in Cluster | Total # in<br>Cluster | p-value     |
|--------------------------------------|----------------------------------------------------------------------|--------------------------------------------|-----------------------|-------------|
| GO:0045281                           | succinate dehydrogenase complex                                      | 1                                          | 263                   | 0.024904895 |
| GO:0045703                           | ketoreductase activity                                               | 1                                          | 263                   | 0.024904895 |
| GO:0046423                           | allene-oxide cyclase activity                                        | 1                                          | 263                   | 0.024904895 |
| GO:0048598                           | embryonic morphogenesis                                              | 1                                          | 263                   | 0.024904895 |
| GO:0009617                           | response to bacterium                                                | 3                                          | 263                   | 0.025918317 |
| GO:0016126                           | sterol biosynthetic process                                          | 2                                          | 263                   | 0.028445855 |
| GO:0051082                           | unfolded protein binding                                             | 4                                          | 263                   | 0.029124341 |
| GO:0006810                           | transport                                                            | 8                                          | 263                   | 0.02960601  |
| GO:0010119                           | regulation of stomatal movement                                      | 2                                          | 263                   | 0.030764669 |
| GO:0016036                           | cellular response to phosphate starvation                            | 2                                          | 263                   | 0.035571451 |
| GO:0005509                           | calcium ion binding                                                  | 5                                          | 263                   | 0.036311796 |
| GO:0001671                           | ATPase activator activity                                            | 1                                          | 263                   | 0.036887979 |
| GO:0003983                           | UTP:glucose-1-phosphate uridylyltransferase activity                 | 1                                          | 263                   | 0.036887979 |
| GO:0003988                           | acetyl-CoA C-acyltransferase activity                                | 1                                          | 263                   | 0.036887979 |
| GO:0003994                           | aconitate hydratase activity                                         | 1                                          | 263                   | 0.036887979 |
| GO:0004047                           | aminomethyltransferase activity                                      | 1                                          | 263                   | 0.036887979 |
| GO:0004096                           | catalase activity                                                    | 1                                          | 263                   | 0.036887979 |
| GO:0004312                           | fatty-acid synthase activity                                         | 1                                          | 263                   | 0.036887979 |
| GO:0004634                           | phosphopyruvate hydratase activity                                   | 1                                          | 263                   | 0.036887979 |
| GO:0004802                           | transketolase activity                                               | 1                                          | 263                   | 0.036887979 |
| GO:0005749                           | mitochondrial respiratory chain complex II                           | 1                                          | 263                   | 0.036887979 |
| GO:0006015                           | 5-phosphoribose 1-diphosphate biosynthetic process                   | 1                                          | 263                   | 0.036887979 |
| GO:0006090                           | pyruvate metabolic process                                           | 1                                          | 263                   | 0.036887979 |
| GO:0006406                           | mRNA export from nucleus                                             | 1                                          | 263                   | 0.036887979 |
| GO:0006465                           | signal peptide processing                                            | 1                                          | 263                   | 0.036887979 |
| GO:0009052                           | pentose-phosphate shunt, non-oxidative branch                        | 1                                          | 263                   | 0.036887979 |
| GO:0009088                           | threonine biosynthetic process                                       | 1                                          | 263                   | 0.036887979 |
| GO:0009678                           | hydrogen-translocating pyrophosphatase activity                      | 1                                          | 263                   | 0.036887979 |
| GO:0009920                           | cell plate formation involved in plant-type cell wall biogenesis     | 1                                          | 263                   | 0.036887979 |
| GO:0010008                           | endosome membrane                                                    | 1                                          | 263                   | 0.036887979 |
| GO:0010255                           | glucose mediated signaling                                           | 1                                          | 263                   | 0.036887979 |
| GO:0015036                           | disulfide oxidoreductase activity                                    | 1                                          | 263                   | 0.036887979 |
| GO:0015217                           | ADP transmembrane transporter activity                               | 1                                          | 263                   | 0.036887979 |
| GO:0015866                           | ADP transport                                                        | 1                                          | 263                   | 0.036887979 |
| GO:0015867                           | ATP transport                                                        | 1                                          | 263                   | 0.036887979 |
| GO:0016651                           | oxidoreductase activity, acting on NADH or NADPH                     | 1                                          | 263                   | 0.036887979 |
| GO:0019395                           | fatty acid oxidation                                                 | 1                                          | 263                   | 0.036887979 |
| GO:0031314                           | extrinsic to mitochondrial inner membrane                            | 1                                          | 263                   | 0.036887979 |
| GO:0031359                           | integral to chloroplast outer membrane                               | 1                                          | 263                   | 0.036887979 |
| GO:0032508                           | DNA duplex unwinding                                                 | 1                                          | 263                   | 0.036887979 |
| GO:0042732                           | D-xylose metabolic process                                           | 1                                          | 263                   | 0.036887979 |
| GO:0043067                           | regulation of programmed cell death                                  | 1                                          | 263                   | 0.036887979 |
| GO:0048040                           | UDP-glucuronate decarboxylase activity                               | 1                                          | 263                   | 0.036887979 |
| GO:0015250                           | water channel activity                                               | 2                                          | 263                   | 0.043156186 |
| GO:0000326                           | protein storage vacuole                                              | 1                                          | 263                   | 0.048565988 |
| GO:0004017                           | adenylate kinase activity                                            | 1                                          | 263                   | 0.048565988 |
| GO:0004473                           | malate dehydrogenase (oxaloacetate-decarboxylating) (NADP+) activity | 1                                          | 263                   | 0.048565988 |
| GO:0005347                           | ATP transmembrane transporter activity                               | 1                                          | 263                   | 0.048565988 |
| GO:0005753                           | mitochondrial proton-transporting ATP synthase complex               | 1                                          | 263                   | 0.048565988 |
| GO:0005779                           | integral to peroxisomal membrane                                     | 1                                          | 263                   | 0.048565988 |

| Cluster 5<br>GO identifier<br>(con.) | Description                                                               | #<br>Associated<br>to the GO<br>in Cluster | Total # in<br>Cluster | p-value     |
|--------------------------------------|---------------------------------------------------------------------------|--------------------------------------------|-----------------------|-------------|
| GO:0005960                           | glycine cleavage complex                                                  | 1                                          | 263                   | 0.048565988 |
| GO:0006207                           | 'de novo' pyrimidine base biosynthetic process                            | 1                                          | 263                   | 0.048565988 |
| GO:0006346                           | methylation-dependent chromatin silencing                                 | 1                                          | 263                   | 0.048565988 |
| GO:0006833                           | water transport                                                           | 1                                          | 263                   | 0.048565988 |
| GO:0006954                           | inflammatory response                                                     | 1                                          | 263                   | 0.048565988 |
| GO:0008453                           | alanine-glyoxylate transaminase activity                                  | 1                                          | 263                   | 0.048565988 |
| GO:0009060                           | aerobic respiration                                                       | 1                                          | 263                   | 0.048565988 |
| GO:0009955                           | adaxial/abaxial pattern formation                                         | 1                                          | 263                   | 0.048565988 |
| GO:0016656                           | monodehydroascorbate reductase (NADH) activity                            | 1                                          | 263                   | 0.048565988 |
| GO:0031897                           | Tic complex                                                               | 1                                          | 263                   | 0.048565988 |
| GO:0006486                           | protein amino acid glycosylation                                          | 2                                          | 263                   | 0.051117872 |
| GO:0009535                           | chloroplast thylakoid membrane                                            | 6                                          | 263                   | 0.056432993 |
| GO:0003924                           | GTPase activity                                                           | 2                                          | 263                   | 0.059381182 |
| GO:0004108                           | citrate (SI)-synthase activity                                            | 1                                          | 263                   | 0.059944675 |
| GO:0004340                           | glucokinase activity                                                      | 1                                          | 263                   | 0.059944675 |
| GO:0004375                           | glycine dehydrogenase (decarboxylating) activity                          | 1                                          | 263                   | 0.059944675 |
| GO:0004396                           | hexokinase activity                                                       | 1                                          | 263                   | 0.059944675 |
| GO:0004449                           | isocitrate dehydrogenase (NAD+) activity                                  | 1                                          | 263                   | 0.059944675 |
| GO:0005985                           | sucrose metabolic process                                                 | 1                                          | 263                   | 0.059944675 |
| GO:0006694                           | steroid biosynthetic process                                              | 1                                          | 263                   | 0.059944675 |
| GO:0008865                           | fructokinase activity                                                     | 1                                          | 263                   | 0.059944675 |
| GO:0009152                           | purine ribonucleotide biosynthetic process                                | 1                                          | 263                   | 0.059944675 |
| GO:0009648                           | photoperiodism                                                            | 1                                          | 263                   | 0.059944675 |
| GO:0010183                           | pollen tube guidance                                                      | 1                                          | 263                   | 0.059944675 |
| GO:0016485                           | protein processing                                                        | 1                                          | 263                   | 0.059944675 |
| GO:0019464                           | glycine decarboxylation via glycine cleavage system                       | 1                                          | 263                   | 0.059944675 |
| GO:0022621                           | shoot system development                                                  | 1                                          | 263                   | 0.059944675 |
| GO:0042744                           | hydrogen peroxide catabolic process                                       | 1                                          | 263                   | 0.059944675 |
| GO:0044262                           | cellular carbohydrate metabolic process                                   | 1                                          | 263                   | 0.059944675 |
| GO:0009414                           | response to water deprivation                                             | 4                                          | 263                   | 0.064410243 |
| GO:0009926                           | auxin polar transport                                                     | 2                                          | 263                   | 0.065023346 |
| GO:0006508                           | proteolysis                                                               | 7                                          | 263                   | 0.070710448 |
| GO:0003878                           | ATP citrate synthase activity                                             | 1                                          | 263                   | 0.071029696 |
| GO:0004029                           | aldehyde dehydrogenase (NAD) activity                                     | 1                                          | 263                   | 0.071029696 |
| GO:0004470                           | malic enzyme activity                                                     | 1                                          | 263                   | 0.071029696 |
| GO:0009086                           | methionine biosynthetic process                                           | 1                                          | 263                   | 0.071029696 |
| GO:0016652                           | oxidoreductase activity, acting on NADH or NADPH, NAD or NADP as acceptor | 1                                          | 263                   | 0.071029696 |
| GO:0045037                           | protein import into chloroplast stroma                                    | 1                                          | 263                   | 0.071029696 |
| GO:0009860                           | pollen tube growth                                                        | 2                                          | 263                   | 0.079459339 |
| GO:0000911                           | cytokinesis by cell plate formation                                       | 1                                          | 263                   | 0.081826614 |
| GO:0003954                           | NADH dehydrogenase activity                                               | 1                                          | 263                   | 0.081826614 |
| GO:0004356                           | glutamate-ammonia ligase activity                                         | 1                                          | 263                   | 0.081826614 |
| GO:0005742                           | mitochondrial outer membrane translocase complex                          | 1                                          | 263                   | 0.081826614 |
| GO:0006995                           | cellular response to nitrogen starvation                                  | 1                                          | 263                   | 0.081826614 |
| GO:0008553                           | hydrogen-exporting ATPase activity, phosphorylative mechanism             | 1                                          | 263                   | 0.081826614 |
| GO:0009610                           | response to symbiotic fungus                                              | 1                                          | 263                   | 0.081826614 |
| GO:0009970                           | cellular response to sulfate starvation                                   | 1                                          | 263                   | 0.081826614 |
| GO:0006839                           | mitochondrial transport                                                   | 2                                          | 263                   | 0.082386095 |
| GO:0009408                           | response to heat                                                          | 3                                          | 263                   | 0.084648801 |

| Cluster 5<br>GO identifier<br>(con.) | Description                                                             | #<br>Associated<br>to the GO<br>in Cluster | Total # in<br>Cluster | p-value     |
|--------------------------------------|-------------------------------------------------------------------------|--------------------------------------------|-----------------------|-------------|
| GO:0015450                           | P-P-bond-hydrolysis-driven protein transmembrane transporter activity   | 2                                          | 263                   | 0.085321391 |
| GO:0016491                           | oxidoreductase activity                                                 | 5                                          | 263                   | 0.090759012 |
| GO:0005982                           | starch metabolic process                                                | 1                                          | 263                   | 0.092340899 |
| GO:0006526                           | arginine biosynthetic process                                           | 1                                          | 263                   | 0.092340899 |
| GO:0008135                           | translation factor activity, nucleic acid binding                       | 1                                          | 263                   | 0.092340899 |
| GO:0009646                           | response to absence of light                                            | 1                                          | 263                   | 0.092340899 |
| GO:0009901                           | anther dehiscence                                                       | 1                                          | 263                   | 0.092340899 |
| GO:0016441                           | posttranscriptional gene silencing                                      | 1                                          | 263                   | 0.092340899 |
| GO:0019430                           | removal of superoxide radicals                                          | 1                                          | 263                   | 0.092340899 |
| GO:0019658                           | glucose catabolic process to lactate and acetate                        | 1                                          | 263                   | 0.092340899 |
| GO:0042128                           | nitrate assimilation                                                    | 1                                          | 263                   | 0.092340899 |
| GO:0045454                           | cell redox homeostasis                                                  | 2                                          | 263                   | 0.094160153 |
| GO:0004784                           | superoxide dismutase activity                                           | 1                                          | 263                   | 0.102577929 |
| GO:0009089                           | lysine biosynthetic process via diaminopimelate                         | 1                                          | 263                   | 0.102577929 |
| GO:0009986                           | cell surface                                                            | 1                                          | 263                   | 0.102577929 |
| GO:0016559                           | peroxisome fission                                                      | 1                                          | 263                   | 0.102577929 |
| GO:0030276                           | clathrin binding                                                        | 1                                          | 263                   | 0.102577929 |
| GO:0042651                           | thylakoid membrane                                                      | 1                                          | 263                   | 0.102577929 |
| GO:0045036                           | protein targeting to chloroplast                                        | 1                                          | 263                   | 0.102577929 |
| GO:0003690                           | double-stranded DNA binding                                             | 1                                          | 263                   | 0.112542992 |
| GO:0004743                           | pyruvate kinase activity                                                | 1                                          | 263                   | 0.112542992 |
| GO:0006014                           | D-ribose metabolic process                                              | 1                                          | 263                   | 0.112542992 |
| GO:0006099                           | tricarboxylic acid cycle                                                | 1                                          | 263                   | 0.112542992 |
| GO:0006108                           | malate metabolic process                                                | 1                                          | 263                   | 0.112542992 |
| GO:0012501                           | programmed cell death                                                   | 1                                          | 263                   | 0.112542992 |
| GO:0016132                           | brassinosteroid biosynthetic process                                    | 1                                          | 263                   | 0.112542992 |
| GO:0019253                           | reductive pentose-phosphate cycle                                       | 1                                          | 263                   | 0.112542992 |
| GO:0019745                           | pentacyclic triterpenoid biosynthetic process                           | 1                                          | 263                   | 0.112542992 |
| GO:0009555                           | pollen development                                                      | 2                                          | 263                   | 0.114762205 |
| GO:0003755                           | peptidyl-prolyl cis-trans isomerase activity                            | 2                                          | 263                   | 0.117680849 |
| GO:0016887                           | ATPase activity                                                         | 3                                          | 263                   | 0.118007226 |
| GO:0009699                           | phenylpropanoid biosynthetic process                                    | 1                                          | 263                   | 0.122241288 |
| GO:0009750                           | response to fructose stimulus                                           | 1                                          | 263                   | 0.122241288 |
| GO:0044267                           | cellular protein metabolic process                                      | 1                                          | 263                   | 0.122241288 |
| GO:0006970                           | response to osmotic stress                                              | 2                                          | 263                   | 0.126370855 |
| GO:0003697                           | single-stranded DNA binding                                             | 1                                          | 263                   | 0.131677929 |
| GO:0006730                           | one-carbon compound metabolic process                                   | 1                                          | 263                   | 0.131677929 |
| GO:0007389                           | pattern specification process                                           | 1                                          | 263                   | 0.131677929 |
| GO:0009306                           | protein secretion                                                       | 1                                          | 263                   | 0.131677929 |
| GO:0009862                           | systemic acquired resistance, salicylic acid mediated signaling pathway | 1                                          | 263                   | 0.131677929 |
| GO:0010075                           | regulation of meristem growth                                           | 1                                          | 263                   | 0.131677929 |
| GO:0019654                           | acetate fermentation                                                    | 1                                          | 263                   | 0.131677929 |
| GO:0045309                           | protein phosphorylated amino acid binding                               | 1                                          | 263                   | 0.131677929 |
| GO:0006800                           | oxygen and reactive oxygen species metabolic process                    | 1                                          | 263                   | 0.140857941 |
| GO:0009737                           | response to abscisic acid stimulus                                      | 4                                          | 263                   | 0.141506133 |
| GO:0007031                           | peroxisome organization                                                 | 1                                          | 263                   | 0.149786267 |
| GO:0010091                           | trichome branching                                                      | 1                                          | 263                   | 0.149786267 |
| GO:0042023                           | DNA endoreduplication                                                   | 1                                          | 263                   | 0.149786267 |
| GO:0042335                           | cuticle development                                                     | 1                                          | 263                   | 0.149786267 |
| GO:0045087                           | innate immune response                                                  | 1                                          | 263                   | 0.149786267 |

| Cluster 5<br>GO identifier<br>(con.) | Description                                               | #<br>Associated<br>to the GO<br>in Cluster | Total # in<br>Cluster | p-value     |
|--------------------------------------|-----------------------------------------------------------|--------------------------------------------|-----------------------|-------------|
| GO:0005737                           | cytoplasm                                                 | 6                                          | 263                   | 0.157277256 |
| GO:0005874                           | microtubule                                               | 1                                          | 263                   | 0.158467766 |
| GO:0009561                           | megagametogenesis                                         | 1                                          | 263                   | 0.158467766 |
| GO:0009825                           | multidimensional cell growth                              | 1                                          | 263                   | 0.158467766 |
| GO:0006626                           | protein targeting to mitochondrion                        | 1                                          | 263                   | 0.166907214 |
| GO:0009504                           | cell plate                                                | 1                                          | 263                   | 0.166907214 |
| GO:0010027                           | thylakoid membrane organization                           | 1                                          | 263                   | 0.166907214 |
| GO:0005516                           | calmodulin binding                                        | 3                                          | 263                   | 0.171732168 |
| GO:0009934                           | regulation of meristem organization                       | 1                                          | 263                   | 0.175109307 |
| GO:0020037                           | heme binding                                              | 1                                          | 263                   | 0.175109307 |
| GO:0016021                           | integral to membrane                                      | 4                                          | 263                   | 0.178805656 |
| GO:0004553                           | hydrolase activity, hydrolyzing O-glycosyl compounds      | 3                                          | 263                   | 0.18275261  |
| GO:0008483                           | transaminase activity                                     | 1                                          | 263                   | 0.183078662 |
| GO:0009225                           | nucleotide-sugar metabolic process                        | 1                                          | 263                   | 0.183078662 |
| GO:0009749                           | response to glucose stimulus                              | 1                                          | 263                   | 0.183078662 |
| GO:0046872                           | metal ion binding                                         | 2                                          | 263                   | 0.184749739 |
| GO:0005986                           | sucrose biosynthetic process                              | 1                                          | 263                   | 0.190819818 |
| GO:0005839                           | proteasome core complex                                   | 1                                          | 263                   | 0.198337237 |
| GO:0008757                           | S-adenosylmethionine-dependent methyltransferase activity | 1                                          | 263                   | 0.198337237 |
| GO:0051301                           | cell division                                             | 1                                          | 263                   | 0.198337237 |
| GO:0009567                           | double fertilization forming a zygote and endosperm       | 1                                          | 263                   | 0.205635305 |
| GO:0009742                           | brassinosteroid mediated signaling                        | 1                                          | 263                   | 0.205635305 |
| GO:0010154                           | fruit development                                         | 1                                          | 263                   | 0.205635305 |
| GO:0010182                           | sugar mediated signaling                                  | 1                                          | 263                   | 0.205635305 |
| GO:0030244                           | cellulose biosynthetic process                            | 1                                          | 263                   | 0.205635305 |
| GO:0005819                           | spindle                                                   | 1                                          | 263                   | 0.212718334 |
| GO:0006414                           | translational elongation                                  | 1                                          | 263                   | 0.212718334 |
| GO:0006461                           | protein complex assembly                                  | 1                                          | 263                   | 0.219590561 |
| GO:0016049                           | cell growth                                               | 1                                          | 263                   | 0.219590561 |
| GO:0005792                           | microsome                                                 | 1                                          | 263                   | 0.226256153 |
| GO:0006635                           | fatty acid beta-oxidation                                 | 1                                          | 263                   | 0.226256153 |
| GO:0009832                           | plant-type cell wall biogenesis                           | 1                                          | 263                   | 0.226256153 |
| GO:0010228                           | vegetative to reproductive phase transition               | 1                                          | 263                   | 0.226256153 |
| GO:0048316                           | seed development                                          | 1                                          | 263                   | 0.232719205 |
| GO:0009611                           | response to wounding                                      | 2                                          | 263                   | 0.238626976 |
| GO:0009664                           | plant-type cell wall organization                         | 1                                          | 263                   | 0.238983742 |
| GO:0009911                           | positive regulation of flower development                 | 1                                          | 263                   | 0.238983742 |
| GO:0009553                           | embryo sac development                                    | 1                                          | 263                   | 0.245053721 |
| GO:0008219                           | cell death                                                | 1                                          | 263                   | 0.262134862 |
| GO:0009809                           | lignin biosynthetic process                               | 1                                          | 263                   | 0.262134862 |
| GO:0009706                           | chloroplast inner membrane                                | 1                                          | 263                   | 0.267464832 |
| GO:0007623                           | circadian rhythm                                          | 1                                          | 263                   | 0.272619032 |
| GO:0015934                           | large ribosomal subunit                                   | 1                                          | 263                   | 0.282414319 |
| GO:0003993                           | acid phosphatase activity                                 | 1                                          | 263                   | 0.291548516 |
| GO:0009524                           | phragmoplast                                              | 1                                          | 263                   | 0.295876129 |
| GO:0009744                           | response to sucrose stimulus                              | 1                                          | 263                   | 0.295876129 |
| GO:0009845                           | seed germination                                          | 1                                          | 263                   | 0.295876129 |
| GO:0015979                           | photosynthesis                                            | 1                                          | 263                   | 0.311665611 |
| GO:0042803                           | protein homodimerization activity                         | 1                                          | 263                   | 0.311665611 |
| GO:0007568                           | aging                                                     | 1                                          | 263                   | 0.32516973  |
| GO:0008233                           | peptidase activity                                        | 1                                          | 263                   | 0.328210828 |
| GO:0016051                           | carbohydrate biosynthetic process                         | 1                                          | 263                   | 0.331123605 |

| Cluster 5<br>GO identifier<br>(con.) | Description                 | #<br>Associated<br>to the GO<br>in Cluster | Total # in<br>Cluster | p-value     |
|--------------------------------------|-----------------------------|--------------------------------------------|-----------------------|-------------|
| GO:0010287                           | plastoglobule               | 1                                          | 263                   | 0.3339108   |
| GO:0016829                           | lyase activity              | 1                                          | 263                   | 0.336575103 |
| GO:0008415                           | acyltransferase activity    | 1                                          | 263                   | 0.357017955 |
| GO:0046658                           | anchored to plasma membrane | 1                                          | 263                   | 0.358494953 |
| GO:0004601                           | peroxidase activity         | 1                                          | 263                   | 0.365453923 |
| GO:0009055                           | electron carrier activity   | 1                                          | 263                   | 0.370209883 |
| GO:0016192                           | vesicle-mediated transport  | 1                                          | 263                   | 0.3706885   |
| GO:0030246                           | carbohydrate binding        | 1                                          | 263                   | 0.370830512 |

### Cluster 5

#### **GO Identifier #Loci Associated Loci (Left to Right)**

|            |    |           |           |           |           |           |           |
|------------|----|-----------|-----------|-----------|-----------|-----------|-----------|
| GO:0000104 | 2  | AT3G27380 | AT5G66760 |           |           |           |           |
| GO:0000221 | 1  | AT1G12840 |           |           |           |           |           |
| GO:0000275 | 1  | AT5G13450 |           |           |           |           |           |
| GO:0000325 | 7  | AT1G12840 | AT1G15690 | AT1G78900 | AT3G42050 | AT3G58730 | AT4G11150 |
|            |    | AT4G39080 |           |           |           |           |           |
| GO:0000326 | 1  | AT1G21750 |           |           |           |           |           |
| GO:0000327 | 1  | AT1G21750 |           |           |           |           |           |
| GO:0000911 | 1  | AT5G42080 |           |           |           |           |           |
| GO:0001671 | 1  | AT3G42050 |           |           |           |           |           |
| GO:0003690 | 1  | AT2G21660 |           |           |           |           |           |
| GO:0003697 | 1  | AT2G21660 |           |           |           |           |           |
| GO:0003746 | 2  | AT1G56070 | AT4G02930 |           |           |           |           |
| GO:0003755 | 2  | AT3G56070 | AT4G34870 |           |           |           |           |
| GO:0003756 | 7  | AT1G21750 | AT1G35620 | AT1G77510 | AT2G32920 | AT2G47470 | AT3G54960 |
|            |    | AT5G60640 |           |           |           |           |           |
| GO:0003824 | 10 | AT2G20360 | AT2G30200 | AT3G12260 | AT3G19820 | AT3G23940 | AT3G52930 |
|            |    | AT3G53520 | AT4G33360 | AT4G34700 | AT5G11560 |           |           |
| GO:0003838 | 1  | AT5G13710 |           |           |           |           |           |
| GO:0003842 | 1  | AT5G62530 |           |           |           |           |           |
| GO:0003867 | 1  | AT3G22200 |           |           |           |           |           |
| GO:0003878 | 1  | AT2G44350 |           |           |           |           |           |
| GO:0003924 | 2  | AT1G59610 | AT5G42080 |           |           |           |           |
| GO:0003954 | 1  | AT5G37510 |           |           |           |           |           |
| GO:0003962 | 1  | AT3G01120 |           |           |           |           |           |
| GO:0003983 | 1  | AT3G03250 |           |           |           |           |           |
| GO:0003988 | 1  | AT2G33150 |           |           |           |           |           |
| GO:0003989 | 2  | AT2G38040 | AT5G35360 |           |           |           |           |
| GO:0003992 | 1  | AT1G80600 |           |           |           |           |           |
| GO:0003993 | 1  | AT5G34850 |           |           |           |           |           |
| GO:0003994 | 1  | AT2G05710 |           |           |           |           |           |
| GO:0004013 | 1  | AT4G13940 |           |           |           |           |           |
| GO:0004017 | 1  | AT5G63400 |           |           |           |           |           |
| GO:0004019 | 1  | AT3G57610 |           |           |           |           |           |
| GO:0004028 | 3  | AT2G14170 | AT3G48000 | AT5G62530 |           |           |           |
| GO:0004029 | 1  | AT3G48000 |           |           |           |           |           |
| GO:0004046 | 1  | AT4G38220 |           |           |           |           |           |
| GO:0004047 | 1  | AT1G11860 |           |           |           |           |           |
| GO:0004069 | 2  | AT2G30970 | AT4G31990 |           |           |           |           |
| GO:0004073 | 1  | AT1G14810 |           |           |           |           |           |
| GO:0004075 | 1  | AT5G35360 |           |           |           |           |           |
| GO:0004086 | 1  | AT1G29900 |           |           |           |           |           |
| GO:0004089 | 2  | AT1G47260 | AT5G66510 |           |           |           |           |
| GO:0004096 | 1  | AT4G35090 |           |           |           |           |           |



**Cluster 5 (con.)**

| <b>GO Identifier</b> | <b>#Loci</b> | <b>Associated Loci (Left to Right)</b> |           |           |           |           |           |
|----------------------|--------------|----------------------------------------|-----------|-----------|-----------|-----------|-----------|
| GO:0004108           | 1            | AT2G44350                              |           |           |           |           |           |
| GO:0004124           | 2            | AT2G43750                              | AT3G59760 |           |           |           |           |
| GO:0004128           | 1            | AT5G17770                              |           |           |           |           |           |
| GO:0004148           | 3            | AT1G48030                              | AT3G16950 | AT3G17240 |           |           |           |
| GO:0004152           | 1            | AT5G23300                              |           |           |           |           |           |
| GO:0004312           | 1            | AT5G46290                              |           |           |           |           |           |
| GO:0004314           | 1            | AT2G30200                              |           |           |           |           |           |
| GO:0004316           | 1            | AT1G24360                              |           |           |           |           |           |
| GO:0004318           | 1            | AT2G05990                              |           |           |           |           |           |
| GO:0004332           | 2            | AT2G01140                              | AT3G52930 |           |           |           |           |
| GO:0004340           | 1            | AT4G29130                              |           |           |           |           |           |
| GO:0004347           | 1            | AT4G24620                              |           |           |           |           |           |
| GO:0004352           | 1            | AT5G07440                              |           |           |           |           |           |
| GO:0004353           | 2            | AT5G07440                              | AT5G18170 |           |           |           |           |
| GO:0004356           | 1            | AT5G35630                              |           |           |           |           |           |
| GO:0004375           | 1            | AT2G26080                              |           |           |           |           |           |
| GO:0004396           | 1            | AT4G29130                              |           |           |           |           |           |
| GO:0004449           | 1            | AT4G35260                              |           |           |           |           |           |
| GO:0004455           | 1            | AT3G58610                              |           |           |           |           |           |
| GO:0004470           | 1            | AT1G79750                              |           |           |           |           |           |
| GO:0004473           | 1            | AT1G79750                              |           |           |           |           |           |
| GO:0004550           | 2            | AT4G09320                              | AT4G11010 |           |           |           |           |
| GO:0004553           | 3            | AT1G62660                              | AT3G09260 | AT5G63840 |           |           |           |
| GO:0004576           | 3            | AT1G34130                              | AT1G76400 | AT5G19690 |           |           |           |
| GO:0004579           | 2            | AT4G21150                              | AT5G66680 |           |           |           |           |
| GO:0004591           | 1            | AT3G55410                              |           |           |           |           |           |
| GO:0004601           | 1            | AT1G35720                              |           |           |           |           |           |
| GO:0004616           | 2            | AT1G64190                              | AT5G41670 |           |           |           |           |
| GO:0004618           | 2            | AT1G79550                              | AT3G12780 |           |           |           |           |
| GO:0004634           | 1            | AT2G36530                              |           |           |           |           |           |
| GO:0004739           | 3            | AT1G01090                              | AT1G24180 | AT5G50850 |           |           |           |
| GO:0004742           | 3            | AT1G34430                              | AT3G13930 | AT3G25860 |           |           |           |
| GO:0004743           | 1            | AT3G22960                              |           |           |           |           |           |
| GO:0004776           | 2            | AT2G20420                              | AT5G08300 |           |           |           |           |
| GO:0004784           | 1            | AT3G10920                              |           |           |           |           |           |
| GO:0004795           | 1            | AT4G29840                              |           |           |           |           |           |
| GO:0004801           | 2            | AT1G12230                              | AT5G13420 |           |           |           |           |
| GO:0004802           | 1            | AT3G60750                              |           |           |           |           |           |
| GO:0004807           | 2            | AT2G21170                              | AT3G55440 |           |           |           |           |
| GO:0004846           | 1            | AT2G26230                              |           |           |           |           |           |
| GO:0005347           | 1            | AT4G01100                              |           |           |           |           |           |
| GO:0005471           | 2            | AT3G08580                              | AT5G13490 |           |           |           |           |
| GO:0005488           | 11           | AT2G20360                              | AT2G30200 | AT3G04830 | AT3G08580 | AT3G42050 | AT3G54110 |
|                      |              | AT4G01100                              | AT4G33360 | AT5G13490 | AT5G14040 | AT5G19760 |           |
| GO:0005507           | 5            | AT1G35720                              | AT1G56070 | AT2G36530 | AT3G09260 | AT4G13940 |           |
| GO:0005509           | 5            | AT1G09210                              | AT1G35720 | AT1G56340 | AT5G61790 | AT5G65020 |           |
| GO:0005516           | 3            | AT3G19820                              | AT5G20720 | AT5G56360 |           |           |           |
| GO:0005524           | 34           | AT1G22300                              | AT1G29900 | AT1G35720 | AT1G48030 | AT1G51980 | AT1G63940 |
|                      |              | AT1G78900                              | AT2G05710 | AT2G20420 | AT2G26080 | AT2G28000 | AT2G33210 |
|                      |              | AT2G44350                              | AT3G07770 | AT3G13860 | AT3G17240 | AT3G23990 | AT3G42050 |
|                      |              | AT3G48000                              | AT3G59760 | AT4G02930 | AT4G09320 | AT4G11010 | AT4G16660 |
|                      |              | AT4G24190                              | AT4G29130 | AT4G34200 | AT4G37910 | AT5G02500 | AT5G07440 |
|                      |              | AT5G09590                              | AT5G18170 | AT5G56500 | AT5G66760 |           |           |
| GO:0005544           | 2            | AT1G35720                              | AT5G65020 |           |           |           |           |
| GO:0005618           | 26           | AT1G03860                              | AT1G35720 | AT1G53240 | AT1G78900 | AT2G05710 | AT2G33040 |
|                      |              | AT2G44350                              | AT3G02090 | AT3G05230 | AT3G07770 | AT3G08580 | AT3G12780 |
|                      |              | AT3G52930                              | AT3G55440 | AT3G58610 | AT4G02930 | AT4G37910 | AT5G02500 |
|                      |              | AT5G08300                              | AT5G09590 | AT5G10160 | AT5G14040 | AT5G15090 | AT5G19760 |
|                      |              | AT5G66760                              | AT5G67500 |           |           |           |           |

**Cluster 5 (con.)**

| <b>GO Identifier</b> | <b>#Loci</b> | <b>Associated Loci (Left to Right)</b> |           |           |           |           |           |
|----------------------|--------------|----------------------------------------|-----------|-----------|-----------|-----------|-----------|
| GO:0005730           | 14           | AT1G56070                              | AT2G21870 | AT2G33040 | AT2G33150 | AT3G02090 | AT3G08580 |
|                      |              | AT3G16950                              | AT3G52300 | AT3G52930 | AT5G02500 | AT5G15090 | AT5G40770 |
|                      |              | AT5G50850                              | AT5G66680 |           |           |           |           |
| GO:0005737           | 6            | AT1G22300                              | AT2G21660 | AT2G33040 | AT2G36530 | AT3G12780 | AT4G20850 |
| GO:0005739           | 109          | AT1G03860                              | AT1G09210 | AT1G11860 | AT1G14810 | AT1G15690 | AT1G22300 |
|                      |              | AT1G24180                              | AT1G35720 | AT1G47260 | AT1G48030 | AT1G51980 | AT1G53240 |
|                      |              | AT1G56340                              | AT1G63940 | AT2G01140 | AT2G05710 | AT2G14170 | AT2G20360 |
|                      |              | AT2G20420                              | AT2G21170 | AT2G21870 | AT2G26080 | AT2G28000 | AT2G30970 |
|                      |              | AT2G33040                              | AT2G33150 | AT2G33210 | AT2G36530 | AT2G43750 | AT2G44350 |
|                      |              | AT3G01280                              | AT3G02090 | AT3G07770 | AT3G08580 | AT3G10920 | AT3G12260 |
|                      |              | AT3G12780                              | AT3G13160 | AT3G13860 | AT3G13930 | AT3G15020 | AT3G15090 |
|                      |              | AT3G16480                              | AT3G17240 | AT3G20000 | AT3G22200 | AT3G23990 | AT3G27240 |
|                      |              | AT3G27380                              | AT3G44330 | AT3G46740 | AT3G47520 | AT3G48000 | AT3G52300 |
|                      |              | AT3G52930                              | AT3G54110 | AT3G55410 | AT3G55440 | AT3G58610 | AT3G59760 |
|                      |              | AT3G61070                              | AT4G01100 | AT4G02580 | AT4G02930 | AT4G05020 | AT4G08390 |
|                      |              | AT4G11010                              | AT4G21150 | AT4G24190 | AT4G29130 | AT4G34200 | AT4G35000 |
|                      |              | AT4G35090                              | AT4G35260 | AT4G37910 | AT4G39660 | AT5G07440 | AT5G08300 |
|                      |              | AT5G08530                              | AT5G09590 | AT5G11770 | AT5G12470 | AT5G13420 | AT5G13450 |
|                      |              | AT5G13490                              | AT5G14040 | AT5G15090 | AT5G18170 | AT5G19760 | AT5G20720 |
|                      |              | AT5G23300                              | AT5G27540 | AT5G35630 | AT5G37510 | AT5G40770 | AT5G40810 |
|                      |              | AT5G41670                              | AT5G42960 | AT5G50850 | AT5G52840 | AT5G55070 | AT5G56500 |
|                      |              | AT5G60640                              | AT5G61790 | AT5G62530 | AT5G63400 | AT5G66510 | AT5G66760 |
|                      |              | AT5G67500                              |           |           |           |           |           |
| GO:0005740           | 4            | AT2G36530                              | AT3G08580 | AT3G52930 | AT5G13490 |           |           |
| GO:0005741           | 6            | AT3G01280                              | AT3G02090 | AT3G16480 | AT3G20000 | AT5G15090 | AT5G67500 |
| GO:0005742           | 1            | AT3G20000                              |           |           |           |           |           |
| GO:0005743           | 10           | AT3G02090                              | AT3G08580 | AT3G16480 | AT3G20000 | AT3G54110 | AT4G01100 |
|                      |              | AT4G11010                              | AT5G13490 | AT5G14040 | AT5G19760 |           |           |
| GO:0005746           | 2            | AT3G27240                              | AT5G40810 |           |           |           |           |
| GO:0005749           | 1            | AT5G66760                              |           |           |           |           |           |
| GO:0005750           | 5            | AT1G51980                              | AT3G02090 | AT3G16480 | AT3G27240 | AT5G40810 |           |
| GO:0005753           | 1            | AT4G11150                              |           |           |           |           |           |
| GO:0005758           | 2            | AT3G02090                              | AT3G16480 |           |           |           |           |
| GO:0005759           | 7            | AT1G48030                              | AT3G02090 | AT3G16480 | AT3G17240 | AT3G23990 | AT4G37910 |
|                      |              | AT5G09590                              |           |           |           |           |           |
| GO:0005773           | 49           | AT1G03860                              | AT1G04410 | AT1G09210 | AT1G11910 | AT1G12840 | AT1G15690 |
|                      |              | AT1G21750                              | AT1G35720 | AT1G59610 | AT1G62660 | AT1G78900 | AT2G07050 |
|                      |              | AT2G18960                              | AT2G24200 | AT2G32920 | AT2G45960 | AT3G01280 | AT3G08580 |
|                      |              | AT3G09260                              | AT3G19820 | AT3G26520 | AT3G27240 | AT3G42050 | AT3G44330 |
|                      |              | AT3G51260                              | AT3G55440 | AT3G58730 | AT4G09320 | AT4G11150 | AT4G12650 |
|                      |              | AT4G13940                              | AT4G20850 | AT4G24190 | AT4G29130 | AT4G33360 | AT4G35000 |
|                      |              | AT4G38220                              | AT4G39080 | AT5G11560 | AT5G13710 | AT5G15090 | AT5G34850 |
|                      |              | AT5G40770                              | AT5G40810 | AT5G42080 | AT5G43060 | AT5G53560 | AT5G61790 |
|                      |              | AT5G66680                              |           |           |           |           |           |
| GO:0005774           | 7            | AT1G12840                              | AT1G15690 | AT1G78900 | AT3G42050 | AT3G58730 | AT4G11150 |
|                      |              | AT4G39080                              |           |           |           |           |           |
| GO:0005777           | 8            | AT2G21660                              | AT2G22780 | AT2G26230 | AT2G33150 | AT3G09260 | AT3G15950 |
|                      |              | AT4G35000                              | AT4G35090 |           |           |           |           |
| GO:0005778           | 2            | AT3G61070                              | AT4G35000 |           |           |           |           |
| GO:0005779           | 1            | AT3G61070                              |           |           |           |           |           |
| GO:0005783           | 36           | AT1G09210                              | AT1G19360 | AT1G20330 | AT1G21750 | AT1G34130 | AT1G35620 |
|                      |              | AT1G56340                              | AT1G61790 | AT1G64090 | AT1G65270 | AT1G67730 | AT1G70770 |
|                      |              | AT1G76400                              | AT1G77510 | AT2G30490 | AT2G32920 | AT2G47470 | AT3G05230 |
|                      |              | AT3G44330                              | AT3G54960 | AT3G62360 | AT4G21150 | AT4G24190 | AT4G24330 |
|                      |              | AT4G29520                              | AT4G31340 | AT4G33360 | AT5G11560 | AT5G17770 | AT5G19690 |
|                      |              | AT5G53560                              | AT5G55940 | AT5G60640 | AT5G61790 | AT5G63840 | AT5G66680 |
| GO:0005789           | 3            | AT4G21150                              | AT5G53560 | AT5G66680 |           |           |           |
| GO:0005792           | 1            | AT5G61790                              |           |           |           |           |           |

**Cluster 5 (con.)**

| <b>GO Identifier</b> | <b>#Loci</b> | <b>Associated Loci (Left to Right)</b> |           |           |           |           |           |
|----------------------|--------------|----------------------------------------|-----------|-----------|-----------|-----------|-----------|
| GO:0005794           | 9            | AT1G10950                              | AT1G26850 | AT1G29470 | AT2G34300 | AT3G49720 | AT3G53520 |
|                      |              | AT4G12650                              | AT4G18030 | AT5G10840 |           |           |           |
| GO:0005819           | 1            | AT3G51260                              |           |           |           |           |           |
| GO:0005829           | 8            | AT1G35720                              | AT1G79550 | AT3G23990 | AT3G55440 | AT3G56070 | AT4G34870 |
|                      |              | AT5G02500                              | AT5G03630 |           |           |           |           |
| GO:0005835           | 1            | AT2G05990                              |           |           |           |           |           |
| GO:0005839           | 1            | AT3G51260                              |           |           |           |           |           |
| GO:0005874           | 1            | AT5G42080                              |           |           |           |           |           |
| GO:0005886           | 99           | AT1G03860                              | AT1G04410 | AT1G12840 | AT1G13280 | AT1G15690 | AT1G22300 |
|                      |              | AT1G34130                              | AT1G34430 | AT1G35620 | AT1G35720 | AT1G51980 | AT1G56070 |
|                      |              | AT1G56340                              | AT1G59610 | AT1G61790 | AT1G65270 | AT1G70770 | AT1G77510 |
|                      |              | AT1G78900                              | AT1G79550 | AT2G05710 | AT2G18960 | AT2G30490 | AT2G31390 |
|                      |              | AT2G32920                              | AT2G33150 | AT2G33210 | AT2G36530 | AT2G45960 | AT2G47470 |
|                      |              | AT3G01280                              | AT3G02090 | AT3G03250 | AT3G04840 | AT3G08580 | AT3G13860 |
|                      |              | AT3G16480                              | AT3G19820 | AT3G20000 | AT3G22200 | AT3G23990 | AT3G26520 |
|                      |              | AT3G27240                              | AT3G42050 | AT3G44330 | AT3G46740 | AT3G47520 | AT3G49720 |
|                      |              | AT3G51260                              | AT3G52300 | AT3G52930 | AT3G54110 | AT3G54960 | AT3G55440 |
|                      |              | AT3G58730                              | AT3G62360 | AT4G01100 | AT4G09320 | AT4G11150 | AT4G12650 |
|                      |              | AT4G13940                              | AT4G16660 | AT4G18030 | AT4G20850 | AT4G21150 | AT4G24190 |
|                      |              | AT4G29130                              | AT4G29520 | AT4G31340 | AT4G33090 | AT4G33360 | AT4G34700 |
|                      |              | AT4G34870                              | AT4G35000 | AT4G37910 | AT4G39080 | AT4G39660 | AT5G02500 |
|                      |              | AT5G07440                              | AT5G09590 | AT5G10840 | AT5G11560 | AT5G13450 | AT5G13490 |
|                      |              | AT5G14030                              | AT5G14040 | AT5G15090 | AT5G17770 | AT5G19690 | AT5G19760 |
|                      |              | AT5G40770                              | AT5G42080 | AT5G50850 | AT5G53560 | AT5G60640 | AT5G61790 |
|                      |              | AT5G63400                              | AT5G66680 | AT5G67500 |           |           |           |
| GO:0005960           | 1            | AT2G26080                              |           |           |           |           |           |
| GO:0005982           | 1            | AT4G24620                              |           |           |           |           |           |
| GO:0005985           | 1            | AT3G03250                              |           |           |           |           |           |
| GO:0005986           | 1            | AT2G31390                              |           |           |           |           |           |
| GO:0006014           | 1            | AT2G31390                              |           |           |           |           |           |
| GO:0006015           | 1            | AT1G12230                              |           |           |           |           |           |
| GO:0006086           | 2            | AT3G16950                              | AT3G25860 |           |           |           |           |
| GO:0006090           | 1            | AT3G13930                              |           |           |           |           |           |
| GO:0006096           | 5            | AT1G79550                              | AT3G12780 | AT3G22960 | AT3G55410 | AT3G55440 |           |
| GO:0006098           | 2            | AT2G01140                              | AT3G52930 |           |           |           |           |
| GO:0006099           | 1            | AT2G44350                              |           |           |           |           |           |
| GO:0006108           | 1            | AT1G79750                              |           |           |           |           |           |
| GO:0006120           | 3            | AT4G02580                              | AT5G08530 | AT5G11770 |           |           |           |
| GO:0006121           | 2            | AT3G27380                              | AT5G66760 |           |           |           |           |
| GO:0006144           | 1            | AT2G26230                              |           |           |           |           |           |
| GO:0006167           | 1            | AT3G57610                              |           |           |           |           |           |
| GO:0006207           | 1            | AT5G23300                              |           |           |           |           |           |
| GO:0006346           | 1            | AT4G13940                              |           |           |           |           |           |
| GO:0006406           | 1            | AT2G21660                              |           |           |           |           |           |
| GO:0006414           | 1            | AT4G02930                              |           |           |           |           |           |
| GO:0006457           | 10           | AT2G28000                              | AT3G07770 | AT3G56070 | AT4G24190 | AT4G34870 | AT4G37910 |
|                      |              | AT5G02500                              | AT5G09590 | AT5G56500 | AT5G61790 |           |           |
| GO:0006461           | 1            | AT4G34450                              |           |           |           |           |           |
| GO:0006465           | 1            | AT3G05230                              |           |           |           |           |           |
| GO:0006486           | 2            | AT1G34130                              | AT1G76400 |           |           |           |           |
| GO:0006496           | 1            | AT4G21150                              |           |           |           |           |           |
| GO:0006508           | 7            | AT1G11910                              | AT1G51980 | AT2G24200 | AT3G02090 | AT3G16480 | AT4G20850 |
|                      |              | AT4G38220                              |           |           |           |           |           |
| GO:0006520           | 2            | AT1G14810                              | AT4G38220 |           |           |           |           |
| GO:0006526           | 1            | AT1G29900                              |           |           |           |           |           |
| GO:0006537           | 2            | AT2G41220                              | AT5G53460 |           |           |           |           |
| GO:0006540           | 1            | AT3G22200                              |           |           |           |           |           |
| GO:0006560           | 1            | AT5G62530                              |           |           |           |           |           |
| GO:0006626           | 1            | AT3G20000                              |           |           |           |           |           |

**Cluster 5 (con.)**

| <b>GO Identifier</b> | <b>#Loci</b> | <b>Associated Loci (Left to Right)</b> |           |           |           |           |           |
|----------------------|--------------|----------------------------------------|-----------|-----------|-----------|-----------|-----------|
| GO:0006633           | 7            | AT1G24360                              | AT1G79750 | AT2G05990 | AT2G30200 | AT2G38040 | AT5G10160 |
|                      |              | AT5G35360                              |           |           |           |           |           |
| GO:0006635           | 1            | AT2G33150                              |           |           |           |           |           |
| GO:0006694           | 1            | AT3G19820                              |           |           |           |           |           |
| GO:0006721           | 1            | AT4G33360                              |           |           |           |           |           |
| GO:0006730           | 1            | AT4G13940                              |           |           |           |           |           |
| GO:0006800           | 1            | AT5G62530                              |           |           |           |           |           |
| GO:0006807           | 2            | AT2G41220                              | AT5G18170 |           |           |           |           |
| GO:0006810           | 8            | AT2G45960                              | AT3G08580 | AT3G26520 | AT3G54110 | AT4G01100 | AT5G13490 |
|                      |              | AT5G14040                              | AT5G19760 |           |           |           |           |
| GO:0006820           | 4            | AT3G01280                              | AT3G20000 | AT5G15090 | AT5G67500 |           |           |
| GO:0006833           | 1            | AT2G45960                              |           |           |           |           |           |
| GO:0006839           | 2            | AT4G01100                              | AT5G19760 |           |           |           |           |
| GO:0006954           | 1            | AT2G33210                              |           |           |           |           |           |
| GO:0006970           | 2            | AT1G35720                              | AT2G21660 |           |           |           |           |
| GO:0006979           | 15           | AT1G09210                              | AT1G35720 | AT1G56340 | AT2G01140 | AT2G05710 | AT2G14170 |
|                      |              | AT3G22200                              | AT4G02580 | AT4G08390 | AT4G11010 | AT4G35000 | AT4G35090 |
|                      |              | AT5G37510                              | AT5G55070 | AT5G60640 |           |           |           |
| GO:0006995           | 1            | AT4G35090                              |           |           |           |           |           |
| GO:0007005           | 3            | AT3G23990                              | AT5G27540 | AT5G40770 |           |           |           |
| GO:0007030           | 2            | AT1G78900                              | AT4G11150 |           |           |           |           |
| GO:0007031           | 1            | AT3G61070                              |           |           |           |           |           |
| GO:0007389           | 1            | AT1G20330                              |           |           |           |           |           |
| GO:0007568           | 1            | AT5G35630                              |           |           |           |           |           |
| GO:0007623           | 1            | AT2G21660                              |           |           |           |           |           |
| GO:0008135           | 1            | AT1G56070                              |           |           |           |           |           |
| GO:0008137           | 3            | AT4G02580                              | AT5G08530 | AT5G11770 |           |           |           |
| GO:0008152           | 19           | AT1G01090                              | AT1G12230 | AT1G24180 | AT1G24360 | AT2G20420 | AT2G30200 |
|                      |              | AT2G41220                              | AT3G03250 | AT3G13930 | AT3G15090 | AT3G23940 | AT3G25860 |
|                      |              | AT3G55410                              | AT3G55440 | AT4G13430 | AT4G35260 | AT5G08300 | AT5G46290 |
|                      |              | AT5G55070                              |           |           |           |           |           |
| GO:0008219           | 1            | AT4G35090                              |           |           |           |           |           |
| GO:0008233           | 1            | AT3G51260                              |           |           |           |           |           |
| GO:0008240           | 1            | AT4G20850                              |           |           |           |           |           |
| GO:0008250           | 1            | AT5G66680                              |           |           |           |           |           |
| GO:0008308           | 4            | AT3G01280                              | AT3G20000 | AT5G15090 | AT5G67500 |           |           |
| GO:0008415           | 1            | AT5G55070                              |           |           |           |           |           |
| GO:0008422           | 1            | AT3G09260                              |           |           |           |           |           |
| GO:0008453           | 1            | AT4G39660                              |           |           |           |           |           |
| GO:0008483           | 1            | AT4G33680                              |           |           |           |           |           |
| GO:0008553           | 1            | AT2G18960                              |           |           |           |           |           |
| GO:0008757           | 1            | AT1G20330                              |           |           |           |           |           |
| GO:0008865           | 1            | AT4G29130                              |           |           |           |           |           |
| GO:0009052           | 1            | AT1G12230                              |           |           |           |           |           |
| GO:0009055           | 1            | AT3G27380                              |           |           |           |           |           |
| GO:0009060           | 1            | AT4G01100                              |           |           |           |           |           |
| GO:0009082           | 2            | AT3G23940                              | AT3G58610 |           |           |           |           |
| GO:0009086           | 1            | AT3G01120                              |           |           |           |           |           |
| GO:0009088           | 1            | AT4G29840                              |           |           |           |           |           |
| GO:0009089           | 1            | AT4G33680                              |           |           |           |           |           |
| GO:0009097           | 1            | AT3G23940                              |           |           |           |           |           |
| GO:0009099           | 1            | AT3G23940                              |           |           |           |           |           |
| GO:0009152           | 1            | AT3G57610                              |           |           |           |           |           |
| GO:0009220           | 1            | AT5G23300                              |           |           |           |           |           |
| GO:0009225           | 1            | AT3G53520                              |           |           |           |           |           |
| GO:0009306           | 1            | AT4G24190                              |           |           |           |           |           |
| GO:0009317           | 1            | AT2G38040                              |           |           |           |           |           |
| GO:0009408           | 3            | AT3G23990                              | AT5G02500 | AT5G09590 |           |           |           |

**Cluster 5 (con.)**

| <b>GO Identifier</b> | <b>#Loci</b> | <b>Associated Loci (Left to Right)</b> |           |           |           |           |           |
|----------------------|--------------|----------------------------------------|-----------|-----------|-----------|-----------|-----------|
| GO:0009409           | 15           | AT1G53240                              | AT1G56070 | AT1G63940 | AT2G21660 | AT2G36530 | AT3G12780 |
|                      |              | AT3G47520                              | AT4G11150 | AT4G21150 | AT4G24190 | AT4G31990 | AT4G35090 |
|                      |              | AT5G02500                              | AT5G04590 | AT5G20720 |           |           |           |
| GO:0009414           | 4            | AT1G15690                              | AT2G18960 | AT2G45960 | AT4G24190 |           |           |
| GO:0009416           | 5            | AT1G48030                              | AT2G30490 | AT2G36530 | AT3G19820 | AT4G35090 |           |
| GO:0009450           | 1            | AT3G22200                              |           |           |           |           |           |
| GO:0009504           | 1            | AT5G42080                              |           |           |           |           |           |
| GO:0009505           | 12           | AT1G21750                              | AT1G35620 | AT2G30490 | AT2G47470 | AT3G62360 | AT4G18030 |
|                      |              | AT4G21150                              | AT5G10840 | AT5G17770 | AT5G34850 | AT5G61790 | AT5G66680 |
| GO:0009507           | 117          | AT1G01090                              | AT1G03860 | AT1G04410 | AT1G06950 | AT1G11860 | AT1G12230 |
|                      |              | AT1G12840                              | AT1G13280 | AT1G14810 | AT1G15690 | AT1G21750 | AT1G24360 |
|                      |              | AT1G29900                              | AT1G30510 | AT1G34430 | AT1G35720 | AT1G47260 | AT1G51980 |
|                      |              | AT1G53240                              | AT1G56070 | AT1G56340 | AT1G61790 | AT1G63940 | AT1G64190 |
|                      |              | AT1G77510                              | AT1G78900 | AT1G79750 | AT1G80600 | AT2G01140 | AT2G05710 |
|                      |              | AT2G05990                              | AT2G21170 | AT2G21660 | AT2G21870 | AT2G22780 | AT2G26080 |
|                      |              | AT2G28000                              | AT2G30200 | AT2G33040 | AT2G33150 | AT2G33210 | AT2G36530 |
|                      |              | AT2G38040                              | AT2G41220 | AT2G43750 | AT2G44350 | AT2G45960 | AT3G01120 |
|                      |              | AT3G01280                              | AT3G02090 | AT3G04840 | AT3G08580 | AT3G12780 | AT3G13930 |
|                      |              | AT3G16950                              | AT3G17240 | AT3G22960 | AT3G23940 | AT3G25860 | AT3G26520 |
|                      |              | AT3G42050                              | AT3G46740 | AT3G47520 | AT3G48000 | AT3G51260 | AT3G52300 |
|                      |              | AT3G52930                              | AT3G54110 | AT3G54960 | AT3G55440 | AT3G57610 | AT3G58610 |
|                      |              | AT3G59760                              | AT3G60750 | AT4G08390 | AT4G09320 | AT4G13430 | AT4G16660 |
|                      |              | AT4G20850                              | AT4G24190 | AT4G24620 | AT4G29840 | AT4G31990 | AT4G33680 |
|                      |              | AT4G34200                              | AT4G34450 | AT4G34870 | AT4G35000 | AT4G35090 | AT4G39080 |
|                      |              | AT5G04590                              | AT5G09590 | AT5G10160 | AT5G12470 | AT5G13420 | AT5G13450 |
|                      |              | AT5G13490                              | AT5G14040 | AT5G15090 | AT5G19760 | AT5G20720 | AT5G26260 |
|                      |              | AT5G35360                              | AT5G35630 | AT5G37510 | AT5G41670 | AT5G42960 | AT5G46290 |
|                      |              | AT5G52840                              | AT5G53460 | AT5G56500 | AT5G60640 | AT5G61790 | AT5G62530 |
|                      |              | AT5G63840                              | AT5G67500 |           |           |           |           |
| GO:0009524           | 1            | AT3G51260                              |           |           |           |           |           |
| GO:0009535           | 6            | AT3G49720                              | AT3G52300 | AT5G20720 | AT5G35630 | AT5G42080 | AT5G53560 |
| GO:0009536           | 25           | AT1G01090                              | AT1G03860 | AT1G47260 | AT1G51980 | AT2G21870 | AT2G43750 |
|                      |              | AT3G01280                              | AT3G16480 | AT3G20000 | AT3G46740 | AT3G52300 | AT4G01100 |
|                      |              | AT4G11010                              | AT4G24620 | AT4G29130 | AT4G31990 | AT5G04590 | AT5G12470 |
|                      |              | AT5G13490                              | AT5G14040 | AT5G15090 | AT5G23300 | AT5G42960 | AT5G53460 |
|                      |              | AT5G63400                              |           |           |           |           |           |
| GO:0009553           | 1            | AT2G47470                              |           |           |           |           |           |
| GO:0009555           | 2            | AT1G78900                              | AT2G07050 |           |           |           |           |
| GO:0009561           | 1            | AT4G34200                              |           |           |           |           |           |
| GO:0009567           | 1            | AT2G47470                              |           |           |           |           |           |
| GO:0009570           | 37           | AT1G04410                              | AT1G14810 | AT1G22300 | AT1G24360 | AT1G29900 | AT1G35720 |
|                      |              | AT1G63940                              | AT1G80600 | AT2G05990 | AT2G21170 | AT2G28000 | AT2G30200 |
|                      |              | AT2G38040                              | AT2G43750 | AT3G12780 | AT3G16950 | AT3G22960 | AT3G23940 |
|                      |              | AT3G25860                              | AT3G47520 | AT3G55440 | AT3G57610 | AT3G58610 | AT3G60750 |
|                      |              | AT4G08390                              | AT4G13430 | AT4G24620 | AT4G31990 | AT4G33680 | AT5G04590 |
|                      |              | AT5G13420                              | AT5G20720 | AT5G35360 | AT5G35630 | AT5G46290 | AT5G53460 |
|                      |              | AT5G56500                              |           |           |           |           |           |
| GO:0009579           | 10           | AT1G21750                              | AT1G35720 | AT2G05990 | AT2G21170 | AT2G28000 | AT3G12780 |
|                      |              | AT3G52300                              | AT5G20720 | AT5G35630 | AT5G65020 |           |           |
| GO:0009610           | 1            | AT3G09260                              |           |           |           |           |           |
| GO:0009611           | 2            | AT2G30490                              | AT2G33150 |           |           |           |           |
| GO:0009615           | 2            | AT5G02500                              | AT5G09590 |           |           |           |           |
| GO:0009617           | 3            | AT3G01280                              | AT5G15090 | AT5G67500 |           |           |           |
| GO:0009646           | 1            | AT5G18170                              |           |           |           |           |           |
| GO:0009648           | 1            | AT4G35090                              |           |           |           |           |           |

**Cluster 5 (con.)**

| <b>GO Identifier</b> | <b>#Loci</b> | <b>Associated Loci (Left to Right)</b> |           |           |           |           |           |
|----------------------|--------------|----------------------------------------|-----------|-----------|-----------|-----------|-----------|
| GO:0009651           | 41           | AT1G04410                              | AT1G09210 | AT1G11910 | AT1G15690 | AT1G21750 | AT1G24180 |
|                      |              | AT1G47260                              | AT1G51980 | AT1G53240 | AT1G56340 | AT1G64190 | AT1G77510 |
|                      |              | AT1G78900                              | AT2G05710 | AT2G20360 | AT2G21660 | AT2G36530 | AT2G45960 |
|                      |              | AT3G03250                              | AT3G09260 | AT3G10920 | AT3G15950 | AT3G26520 | AT3G52300 |
|                      |              | AT3G52930                              | AT3G55440 | AT3G60750 | AT4G09320 | AT4G11150 | AT4G24190 |
|                      |              | AT4G37910                              | AT5G03630 | AT5G04590 | AT5G07440 | AT5G09590 | AT5G18170 |
|                      |              | AT5G19690                              | AT5G35630 | AT5G40770 | AT5G43060 | AT5G62530 |           |
| GO:0009658           | 3            | AT1G06950                              | AT2G28000 | AT3G46740 |           |           |           |
| GO:0009664           | 1            | AT5G66680                              |           |           |           |           |           |
| GO:0009678           | 1            | AT1G15690                              |           |           |           |           |           |
| GO:0009695           | 2            | AT1G13280                              | AT2G33150 |           |           |           |           |
| GO:0009699           | 1            | AT2G30490                              |           |           |           |           |           |
| GO:0009705           | 3            | AT1G15690                              | AT4G11150 | AT4G39080 |           |           |           |
| GO:0009706           | 1            | AT5G12470                              |           |           |           |           |           |
| GO:0009737           | 4            | AT1G35720                              | AT2G05710 | AT2G18960 | AT2G36530 |           |           |
| GO:0009742           | 1            | AT1G22300                              |           |           |           |           |           |
| GO:0009744           | 1            | AT5G41670                              |           |           |           |           |           |
| GO:0009749           | 1            | AT5G41670                              |           |           |           |           |           |
| GO:0009750           | 1            | AT5G41670                              |           |           |           |           |           |
| GO:0009790           | 3            | AT1G21750                              | AT2G28000 | AT5G27540 |           |           |           |
| GO:0009793           | 12           | AT1G34430                              | AT1G79750 | AT2G47470 | AT3G10920 | AT4G11150 | AT4G13940 |
|                      |              | AT5G13710                              | AT5G27540 | AT5G37510 | AT5G40480 | AT5G42080 | AT5G55940 |
| GO:0009809           | 1            | AT1G12840                              |           |           |           |           |           |
| GO:0009825           | 1            | AT1G20330                              |           |           |           |           |           |
| GO:0009826           | 4            | AT1G12840                              | AT3G19820 | AT5G63840 | AT5G66680 |           |           |
| GO:0009832           | 1            | AT4G11150                              |           |           |           |           |           |
| GO:0009845           | 1            | AT1G79750                              |           |           |           |           |           |
| GO:0009853           | 6            | AT1G47260                              | AT3G54110 | AT4G34700 | AT5G37510 | AT5G52840 | AT5G66510 |
| GO:0009860           | 2            | AT3G22200                              | AT5G27540 |           |           |           |           |
| GO:0009862           | 1            | AT4G33680                              |           |           |           |           |           |
| GO:0009865           | 1            | AT3G22200                              |           |           |           |           |           |
| GO:0009901           | 1            | AT1G47260                              |           |           |           |           |           |
| GO:0009911           | 1            | AT4G24620                              |           |           |           |           |           |
| GO:0009920           | 1            | AT5G42080                              |           |           |           |           |           |
| GO:0009926           | 2            | AT1G15690                              | AT4G33090 |           |           |           |           |
| GO:0009934           | 1            | AT4G24190                              |           |           |           |           |           |
| GO:0009941           | 38           | AT1G01090                              | AT1G06950 | AT1G11860 | AT1G15690 | AT1G24360 | AT1G34430 |
|                      |              | AT1G78900                              | AT2G05990 | AT2G21170 | AT2G26080 | AT2G28000 | AT2G38040 |
|                      |              | AT2G41220                              | AT2G43750 | AT3G01280 | AT3G08580 | AT3G12780 | AT3G13930 |
|                      |              | AT3G16950                              | AT3G25860 | AT3G46740 | AT3G47520 | AT3G58610 | AT3G60750 |
|                      |              | AT4G24620                              | AT4G31990 | AT4G35000 | AT5G04590 | AT5G12470 | AT5G13490 |
|                      |              | AT5G15090                              | AT5G19760 | AT5G20720 | AT5G35360 | AT5G35630 | AT5G42960 |
|                      |              | AT5G46290                              | AT5G67500 |           |           |           |           |
| GO:0009955           | 1            | AT2G27530                              |           |           |           |           |           |
| GO:0009970           | 1            | AT4G35090                              |           |           |           |           |           |
| GO:0009986           | 1            | AT5G65020                              |           |           |           |           |           |
| GO:0010006           | 1            | AT3G46740                              |           |           |           |           |           |
| GO:0010008           | 1            | AT1G15690                              |           |           |           |           |           |
| GO:0010027           | 1            | AT2G07050                              |           |           |           |           |           |
| GO:0010033           | 1            | AT3G22200                              |           |           |           |           |           |
| GO:0010051           | 2            | AT1G20330                              | AT5G42080 |           |           |           |           |
| GO:0010075           | 1            | AT4G24190                              |           |           |           |           |           |
| GO:0010091           | 1            | AT5G42080                              |           |           |           |           |           |
| GO:0010111           | 1            | AT2G33150                              |           |           |           |           |           |
| GO:0010119           | 2            | AT2G18960                              | AT2G21660 |           |           |           |           |
| GO:0010133           | 1            | AT5G62530                              |           |           |           |           |           |
| GO:0010154           | 1            | AT3G22200                              |           |           |           |           |           |
| GO:0010168           | 2            | AT3G09260                              | AT3G15950 |           |           |           |           |
| GO:0010182           | 1            | AT4G29130                              |           |           |           |           |           |

**Cluster 5 (con.)**

| <b>GO Identifier</b> | <b>#Loci</b> | <b>Associated Loci (Left to Right)</b> |           |           |           |           |           |
|----------------------|--------------|----------------------------------------|-----------|-----------|-----------|-----------|-----------|
| GO:0010183           | 1            | AT3G22200                              |           |           |           |           |           |
| GO:0010228           | 1            | AT2G21660                              |           |           |           |           |           |
| GO:0010248           | 1            | AT1G15690                              |           |           |           |           |           |
| GO:0010255           | 1            | AT4G29130                              |           |           |           |           |           |
| GO:0010285           | 1            | AT4G33680                              |           |           |           |           |           |
| GO:0010287           | 1            | AT2G01140                              |           |           |           |           |           |
| GO:0010319           | 6            | AT1G63940                              | AT3G12780 | AT3G47520 | AT4G31990 | AT4G35090 | AT5G04590 |
| GO:0010501           | 1            | AT2G21660                              |           |           |           |           |           |
| GO:0012501           | 1            | AT4G29130                              |           |           |           |           |           |
| GO:0015036           | 1            | AT4G05020                              |           |           |           |           |           |
| GO:0015157           | 1            | AT1G61790                              |           |           |           |           |           |
| GO:0015217           | 1            | AT4G01100                              |           |           |           |           |           |
| GO:0015250           | 2            | AT2G45960                              | AT3G26520 |           |           |           |           |
| GO:0015450           | 2            | AT3G20000                              | AT3G46740 |           |           |           |           |
| GO:0015774           | 1            | AT5G65020                              |           |           |           |           |           |
| GO:0015865           | 2            | AT3G08580                              | AT5G13490 |           |           |           |           |
| GO:0015866           | 1            | AT4G01100                              |           |           |           |           |           |
| GO:0015867           | 1            | AT4G01100                              |           |           |           |           |           |
| GO:0015926           | 1            | AT5G63840                              |           |           |           |           |           |
| GO:0015928           | 1            | AT3G09260                              |           |           |           |           |           |
| GO:0015934           | 1            | AT2G27530                              |           |           |           |           |           |
| GO:0015979           | 1            | AT3G54110                              |           |           |           |           |           |
| GO:0015986           | 3            | AT2G33040                              | AT4G11150 | AT5G13450 |           |           |           |
| GO:0015992           | 4            | AT1G78900                              | AT2G18960 | AT2G33040 | AT4G39080 |           |           |
| GO:0016002           | 1            | AT5G04590                              |           |           |           |           |           |
| GO:0016018           | 1            | AT3G56070                              |           |           |           |           |           |
| GO:0016020           | 74           | AT1G04410                              | AT1G06950 | AT1G10950 | AT1G11860 | AT1G15690 | AT1G21750 |
|                      |              | AT1G26850                              | AT1G29900 | AT1G34130 | AT1G35720 | AT1G47260 | AT1G51980 |
|                      |              | AT1G56070                              | AT1G64190 | AT1G67730 | AT1G70770 | AT1G76400 | AT1G78900 |
|                      |              | AT1G79550                              | AT2G18960 | AT2G20360 | AT2G21870 | AT2G28000 | AT2G30490 |
|                      |              | AT2G33040                              | AT2G33150 | AT2G36530 | AT2G38040 | AT2G45960 | AT3G02090 |
|                      |              | AT3G08580                              | AT3G09260 | AT3G12260 | AT3G12780 | AT3G13160 | AT3G15020 |
|                      |              | AT3G15950                              | AT3G19820 | AT3G25860 | AT3G26520 | AT3G27240 | AT3G46740 |
|                      |              | AT3G47520                              | AT3G49720 | AT3G53520 | AT3G58730 | AT4G01100 | AT4G08390 |
|                      |              | AT4G13940                              | AT4G20850 | AT4G21150 | AT4G24190 | AT4G29130 | AT4G34200 |
|                      |              | AT4G34450                              | AT4G39080 | AT4G39660 | AT5G02500 | AT5G04590 | AT5G10160 |
|                      |              | AT5G13450                              | AT5G13490 | AT5G14040 | AT5G15090 | AT5G19690 | AT5G35630 |
|                      |              | AT5G40770                              | AT5G40810 | AT5G46290 | AT5G52840 | AT5G56500 | AT5G61790 |
|                      |              | AT5G66680                              | AT5G67500 |           |           |           |           |
| GO:0016021           | 4            | AT1G10950                              | AT3G19820 | AT4G12650 | AT5G10840 |           |           |
| GO:0016036           | 2            | AT3G03250                              | AT4G35090 |           |           |           |           |
| GO:0016040           | 1            | AT5G53460                              |           |           |           |           |           |
| GO:0016041           | 1            | AT2G41220                              |           |           |           |           |           |
| GO:0016049           | 1            | AT5G40770                              |           |           |           |           |           |
| GO:0016051           | 1            | AT1G12840                              |           |           |           |           |           |
| GO:0016126           | 2            | AT1G20330                              | AT5G13710 |           |           |           |           |
| GO:0016132           | 1            | AT3G19820                              |           |           |           |           |           |
| GO:0016192           | 1            | AT4G34450                              |           |           |           |           |           |
| GO:0016441           | 1            | AT4G13940                              |           |           |           |           |           |
| GO:0016485           | 1            | AT3G44330                              |           |           |           |           |           |
| GO:0016491           | 5            | AT1G30510                              | AT1G67730 | AT2G05990 | AT5G07440 | AT5G18170 |           |
| GO:0016559           | 1            | AT3G61070                              |           |           |           |           |           |
| GO:0016615           | 5            | AT1G04410                              | AT1G53240 | AT2G22780 | AT3G15020 | AT3G47520 |           |
| GO:0016620           | 1            | AT1G14810                              |           |           |           |           |           |
| GO:0016631           | 1            | AT2G05990                              |           |           |           |           |           |
| GO:0016651           | 1            | AT5G52840                              |           |           |           |           |           |
| GO:0016652           | 1            | AT1G79750                              |           |           |           |           |           |
| GO:0016656           | 1            | AT5G03630                              |           |           |           |           |           |
| GO:0016688           | 2            | AT4G08390                              | AT4G35000 |           |           |           |           |

**Cluster 5 (con.)**

| <b>GO Identifier</b> | <b>#Loci</b> | <b>Associated Loci (Left to Right)</b> |           |           |           |           |           |
|----------------------|--------------|----------------------------------------|-----------|-----------|-----------|-----------|-----------|
| GO:0016710           | 1            | AT2G30490                              |           |           |           |           |           |
| GO:0016829           | 1            | AT4G13430                              |           |           |           |           |           |
| GO:0016871           | 1            | AT2G07050                              |           |           |           |           |           |
| GO:0016887           | 3            | AT1G15690                              | AT2G18960 | AT4G39080 |           |           |           |
| GO:0017077           | 2            | AT3G54110                              | AT5G19760 |           |           |           |           |
| GO:0018119           | 3            | AT1G53240                              | AT3G12780 | AT3G55440 |           |           |           |
| GO:0018279           | 1            | AT5G66680                              |           |           |           |           |           |
| GO:0019171           | 1            | AT5G10160                              |           |           |           |           |           |
| GO:0019253           | 1            | AT2G21170                              |           |           |           |           |           |
| GO:0019320           | 1            | AT4G29130                              |           |           |           |           |           |
| GO:0019344           | 2            | AT2G43750                              | AT3G59760 |           |           |           |           |
| GO:0019395           | 1            | AT2G33150                              |           |           |           |           |           |
| GO:0019419           | 1            | AT5G04590                              |           |           |           |           |           |
| GO:0019430           | 1            | AT3G10920                              |           |           |           |           |           |
| GO:0019464           | 1            | AT2G26080                              |           |           |           |           |           |
| GO:0019484           | 1            | AT3G22200                              |           |           |           |           |           |
| GO:0019575           | 2            | AT1G62660                              | AT2G31390 |           |           |           |           |
| GO:0019654           | 1            | AT2G31390                              |           |           |           |           |           |
| GO:0019658           | 1            | AT1G12230                              |           |           |           |           |           |
| GO:0019676           | 1            | AT5G35630                              |           |           |           |           |           |
| GO:0019745           | 1            | AT2G07050                              |           |           |           |           |           |
| GO:0019773           | 1            | AT3G51260                              |           |           |           |           |           |
| GO:0020037           | 1            | AT5G53560                              |           |           |           |           |           |
| GO:0022621           | 1            | AT3G22200                              |           |           |           |           |           |
| GO:0022626           | 15           | AT1G11860                              | AT1G34430 | AT2G27530 | AT2G28000 | AT3G04840 | AT3G23990 |
|                      |              | AT3G25860                              | AT3G51260 | AT3G52300 | AT4G11150 | AT4G20850 | AT4G35090 |
|                      |              | AT5G02500                              | AT5G35630 | AT5G55070 |           |           |           |
| GO:0022900           | 1            | AT5G17770                              |           |           |           |           |           |
| GO:0030104           | 1            | AT3G26520                              |           |           |           |           |           |
| GO:0030244           | 1            | AT5G63840                              |           |           |           |           |           |
| GO:0030246           | 1            | AT3G62360                              |           |           |           |           |           |
| GO:0030276           | 1            | AT4G34450                              |           |           |           |           |           |
| GO:0031314           | 1            | AT4G05020                              |           |           |           |           |           |
| GO:0031359           | 1            | AT3G46740                              |           |           |           |           |           |
| GO:0031897           | 1            | AT1G06950                              |           |           |           |           |           |
| GO:0031966           | 5            | AT1G47260                              | AT4G34700 | AT5G37510 | AT5G52840 | AT5G66510 |           |
| GO:0031998           | 1            | AT2G22780                              |           |           |           |           |           |
| GO:0032508           | 1            | AT2G21660                              |           |           |           |           |           |
| GO:0034387           | 1            | AT3G22200                              |           |           |           |           |           |
| GO:0042023           | 1            | AT1G20330                              |           |           |           |           |           |
| GO:0042128           | 1            | AT5G53460                              |           |           |           |           |           |
| GO:0042335           | 1            | AT1G67730                              |           |           |           |           |           |
| GO:0042651           | 1            | AT1G30510                              |           |           |           |           |           |
| GO:0042732           | 1            | AT3G53520                              |           |           |           |           |           |
| GO:0042742           | 8            | AT1G53240                              | AT1G80600 | AT3G10920 | AT3G15020 | AT3G26520 | AT4G11150 |
|                      |              | AT5G15090                              | AT5G50850 |           |           |           |           |
| GO:0042744           | 1            | AT4G35090                              |           |           |           |           |           |
| GO:0042803           | 1            | AT1G35720                              |           |           |           |           |           |
| GO:0043067           | 1            | AT1G21750                              |           |           |           |           |           |
| GO:0044262           | 1            | AT3G55440                              |           |           |           |           |           |
| GO:0044267           | 1            | AT5G56500                              |           |           |           |           |           |
| GO:0045036           | 1            | AT3G46740                              |           |           |           |           |           |
| GO:0045037           | 1            | AT1G06950                              |           |           |           |           |           |
| GO:0045087           | 1            | AT2G21660                              |           |           |           |           |           |
| GO:0045153           | 2            | AT3G27240                              | AT5G40810 |           |           |           |           |
| GO:0045271           | 12           | AT1G03860                              | AT1G47260 | AT2G20360 | AT3G12260 | AT4G02580 | AT4G34700 |
|                      |              | AT5G08530                              | AT5G11770 | AT5G37510 | AT5G40770 | AT5G52840 | AT5G66510 |
| GO:0045281           | 1            | AT3G27380                              |           |           |           |           |           |
| GO:0045309           | 1            | AT1G22300                              |           |           |           |           |           |



**Cluster 5 (con.)**

| <b>GO Identifier</b> | <b>#Loci</b> | <b>Associated Loci (Left to Right)</b> |           |           |           |           |           |
|----------------------|--------------|----------------------------------------|-----------|-----------|-----------|-----------|-----------|
| GO:0045454           | 2            | AT1G35620                              | AT4G35090 |           |           |           |           |
| GO:0045703           | 1            | AT1G67730                              |           |           |           |           |           |
| GO:0046423           | 1            | AT1G13280                              |           |           |           |           |           |
| GO:0046658           | 1            | AT2G45960                              |           |           |           |           |           |
| GO:0046686           | 49           | AT1G04410                              | AT1G11860 | AT1G35720 | AT1G48030 | AT1G53240 | AT1G56340 |
|                      |              | AT1G63940                              | AT1G77510 | AT2G01140 | AT2G05710 | AT2G20420 | AT2G21660 |
|                      |              | AT2G24200                              | AT2G30970 | AT2G36530 | AT2G43750 | AT2G44350 | AT2G47470 |
|                      |              | AT3G12780                              | AT3G13860 | AT3G17240 | AT3G22200 | AT3G22960 | AT3G23990 |
|                      |              | AT3G48000                              | AT3G52930 | AT3G55440 | AT3G56070 | AT3G57610 | AT3G58610 |
|                      |              | AT3G60750                              | AT4G09320 | AT4G13430 | AT4G24190 | AT4G31990 | AT4G37910 |
|                      |              | AT4G39660                              | AT5G02500 | AT5G03630 | AT5G07440 | AT5G08300 | AT5G09590 |
|                      |              | AT5G13420                              | AT5G18170 | AT5G20720 | AT5G41670 | AT5G53460 | AT5G63400 |
|                      |              | AT5G63840                              |           |           |           |           |           |
| GO:0046872           | 2            | AT3G10920                              | AT5G08300 |           |           |           |           |
| GO:0046933           | 4            | AT1G78900                              | AT2G33040 | AT3G52300 | AT5G13450 |           |           |
| GO:0046961           | 6            | AT1G12840                              | AT2G33040 | AT3G42050 | AT3G52300 | AT3G58730 | AT4G11150 |
| GO:0048040           | 1            | AT3G53520                              |           |           |           |           |           |
| GO:0048046           | 23           | AT1G04410                              | AT1G11860 | AT1G35720 | AT1G48030 | AT1G79550 | AT2G21170 |
|                      |              | AT2G28000                              | AT2G36530 | AT2G43750 | AT3G12780 | AT3G15020 | AT3G47520 |
|                      |              | AT3G52930                              | AT3G55440 | AT3G57610 | AT3G58610 | AT4G09320 | AT4G31990 |
|                      |              | AT4G34870                              | AT5G02500 | AT5G04590 | AT5G20720 | AT5G35630 |           |
| GO:0048316           | 1            | AT1G21750                              |           |           |           |           |           |
| GO:0048569           | 1            | AT2G27530                              |           |           |           |           |           |
| GO:0048598           | 1            | AT3G46740                              |           |           |           |           |           |
| GO:0048868           | 2            | AT2G47470                              | AT3G59760 |           |           |           |           |
| GO:0050311           | 1            | AT5G04590                              |           |           |           |           |           |
| GO:0050662           | 2            | AT2G20360                              | AT4G33360 |           |           |           |           |
| GO:0051082           | 4            | AT2G28000                              | AT3G13860 | AT5G56500 | AT5G61790 |           |           |
| GO:0051131           | 1            | AT3G23990                              |           |           |           |           |           |
| GO:0051301           | 1            | AT5G40770                              |           |           |           |           |           |



**Cluster 6**

|           |           |           |           |           |
|-----------|-----------|-----------|-----------|-----------|
| AT1G01040 | AT2G01690 | AT3G02260 | AT4G01210 | AT5G02530 |
| AT1G03880 | AT2G15270 | AT3G03220 | AT4G03190 | AT5G05690 |
| AT1G04690 | AT2G16640 | AT3G03330 | AT4G04940 | AT5G06060 |
| AT1G04850 | AT2G16760 | AT3G03990 | AT4G08520 | AT5G08610 |
| AT1G06000 | AT2G17790 | AT3G04600 | AT4G08790 | AT5G08670 |
| AT1G07750 | AT2G19520 | AT3G04820 | AT4G10260 | AT5G09420 |
| AT1G08640 | AT2G20890 | AT3G04940 | AT4G11850 | AT5G09510 |
| AT1G08840 | AT2G21620 | AT3G07100 | AT4G14680 | AT5G10540 |
| AT1G12310 | AT2G23070 | AT3G07160 | AT4G17270 | AT5G11240 |
| AT1G13560 | AT2G26730 | AT3G07390 | AT4G18830 | AT5G11700 |
| AT1G15750 | AT2G27000 | AT3G07610 | AT4G19006 | AT5G13000 |
| AT1G16350 | AT2G27040 | AT3G09300 | AT4G20980 | AT5G13520 |
| AT1G16890 | AT2G28490 | AT3G10380 | AT4G23460 | AT5G14105 |
| AT1G19440 | AT2G31320 | AT3G12050 | AT4G23540 | AT5G15610 |
| AT1G19800 | AT2G31360 | AT3G12670 | AT4G23650 | AT5G16450 |
| AT1G19900 | AT2G32060 | AT3G13300 | AT4G23690 | AT5G16550 |
| AT1G19920 | AT2G32730 | AT3G16400 | AT4G24550 | AT5G19130 |
| AT1G20090 | AT2G33340 | AT3G17210 | AT4G26210 | AT5G24350 |
| AT1G20950 | AT2G35630 | AT3G18060 | AT4G27160 | AT5G24690 |
| AT1G21160 | AT2G36580 | AT3G20410 | AT4G27170 | AT5G27640 |
| AT1G21690 | AT2G36910 | AT3G20790 | AT4G29120 | AT5G27770 |
| AT1G22200 | AT2G37020 | AT3G25800 | AT4G29900 | AT5G37830 |
| AT1G22460 | AT2G37040 | AT3G44110 | AT4G30080 | AT5G39740 |
| AT1G27310 | AT2G37050 | AT3G46210 | AT4G31700 | AT5G43010 |
| AT1G27970 | AT2G39040 | AT3G46940 | AT4G33650 | AT5G44510 |
| AT1G30690 | AT2G40290 | AT3G47370 | AT4G35490 | AT5G46430 |
| AT1G31730 | AT2G40660 | AT3G51100 | AT4G35580 | AT5G47690 |
| AT1G33040 | AT2G41790 | AT3G51670 | AT4G37190 | AT5G48480 |
| AT1G33680 | AT2G42770 | AT3G52140 | AT4G38630 | AT5G51820 |
| AT1G33810 | AT2G42810 | AT3G52580 | AT4G39200 | AT5G53400 |
| AT1G44835 | AT2G43400 | AT3G54470 |           | AT5G56010 |
| AT1G49410 | AT2G43630 | AT3G56490 |           | AT5G56680 |
| AT1G50030 | AT2G43770 | AT3G57220 |           | AT5G57020 |
| AT1G50110 | AT2G44100 | AT3G57410 |           | AT5G57290 |
| AT1G51160 | AT2G45820 | AT3G58510 |           | AT5G59010 |
| AT1G51710 |           | AT3G59280 |           | AT5G60040 |
| AT1G52740 |           | AT3G59890 |           | AT5G61020 |
| AT1G61730 |           | AT3G59990 |           | AT5G61140 |
| AT1G63660 |           | AT3G60245 |           | AT5G61170 |
| AT1G65020 |           | AT3G60770 |           | AT5G62190 |
| AT1G65220 |           | AT3G60860 |           | AT5G62670 |
| AT1G66430 |           | AT3G61580 |           | AT5G64270 |
| AT1G67120 |           | AT3G63130 |           | AT5G65270 |
| AT1G67430 |           |           |           | AT5G65700 |
| AT1G70580 |           |           |           |           |
| AT1G72150 |           |           |           |           |
| AT1G72540 |           |           |           |           |
| AT1G73180 |           |           |           |           |
| AT1G73590 |           |           |           |           |
| AT1G74560 |           |           |           |           |
| AT1G75280 |           |           |           |           |
| AT1G75640 |           |           |           |           |

**Cluster 6**  
AT1G75990  
AT1G76860  
AT1G79500  
AT1G80500

| Cluster 6<br>GO identifier | Description                                              | #<br>Associated<br>to the GO<br>in Cluster | Total # in<br>Cluster | p-value     |
|----------------------------|----------------------------------------------------------|--------------------------------------------|-----------------------|-------------|
| GO:0005886                 | plasma membrane                                          | 46                                         | 208                   | 1.30E-10    |
| GO:0005730                 | nucleolus                                                | 14                                         | 208                   | 1.09E-07    |
| GO:0003735                 | structural constituent of ribosome                       | 14                                         | 208                   | 8.96E-07    |
| GO:0022627                 | cytosolic small ribosomal subunit                        | 8                                          | 208                   | 1.24E-06    |
| GO:0022626                 | cytosolic ribosome                                       | 10                                         | 208                   | 6.15E-06    |
| GO:0006412                 | translation                                              | 13                                         | 208                   | 7.48E-06    |
| GO:0005635                 | nuclear envelope                                         | 4                                          | 208                   | 2.01E-05    |
| GO:0006606                 | protein import into nucleus                              | 3                                          | 208                   | 5.21E-05    |
| GO:0008540                 | proteasome regulatory particle, base subcomplex          | 3                                          | 208                   | 5.21E-05    |
| GO:0005840                 | ribosome                                                 | 9                                          | 208                   | 8.31E-05    |
| GO:0045735                 | nutrient reservoir activity                              | 5                                          | 208                   | 1.54E-04    |
| GO:0006177                 | GMP biosynthetic process                                 | 2                                          | 208                   | 2.94E-04    |
| GO:0008026                 | ATP-dependent helicase activity                          | 5                                          | 208                   | 5.29E-04    |
| GO:0004781                 | sulfate adenylyltransferase (ATP) activity               | 2                                          | 208                   | 5.82E-04    |
| GO:0006913                 | nucleocytoplasmic transport                              | 3                                          | 208                   | 6.88E-04    |
| GO:0048589                 | developmental growth                                     | 2                                          | 208                   | 9.61E-04    |
| GO:0000910                 | cytokinesis                                              | 3                                          | 208                   | 0.001088727 |
| GO:0005737                 | cytoplasm                                                | 11                                         | 208                   | 0.002479565 |
| GO:0022625                 | cytosolic large ribosomal subunit                        | 5                                          | 208                   | 0.002789866 |
| GO:0009941                 | chloroplast envelope                                     | 10                                         | 208                   | 0.002869342 |
| GO:0030276                 | clathrin binding                                         | 2                                          | 208                   | 0.00332469  |
| GO:0006014                 | D-ribose metabolic process                               | 2                                          | 208                   | 0.004114794 |
| GO:0009926                 | auxin polar transport                                    | 3                                          | 208                   | 0.005038795 |
| GO:0009733                 | response to auxin stimulus                               | 7                                          | 208                   | 0.005240254 |
| GO:0009640                 | photomorphogenesis                                       | 3                                          | 208                   | 0.005429401 |
| GO:0000103                 | sulfate assimilation                                     | 2                                          | 208                   | 0.005916336 |
| GO:0000148                 | 1,3-beta-glucan synthase complex                         | 2                                          | 208                   | 0.005916336 |
| GO:0003843                 | 1,3-beta-glucan synthase activity                        | 2                                          | 208                   | 0.005916336 |
| GO:0006075                 | 1,3-beta-glucan biosynthetic process                     | 2                                          | 208                   | 0.005916336 |
| GO:0019654                 | acetate fermentation                                     | 2                                          | 208                   | 0.005916336 |
| GO:0019575                 | sucrose catabolic process, using beta-fructofuranosidase | 2                                          | 208                   | 0.009136011 |
| GO:0000072                 | M phase specific microtubule process                     | 1                                          | 208                   | 0.009973627 |
| GO:0003922                 | GMP synthase (glutamine-hydrolyzing) activity            | 1                                          | 208                   | 0.009973627 |
| GO:0004170                 | dUTP diphosphatase activity                              | 1                                          | 208                   | 0.009973627 |
| GO:0005201                 | extracellular matrix structural constituent              | 1                                          | 208                   | 0.009973627 |
| GO:0006436                 | tryptophanyl-tRNA aminoacylation                         | 1                                          | 208                   | 0.009973627 |
| GO:0009394                 | 2'-deoxyribonucleotide metabolic process                 | 1                                          | 208                   | 0.009973627 |
| GO:0009528                 | plastid inner membrane                                   | 1                                          | 208                   | 0.009973627 |
| GO:0010064                 | embryonic shoot morphogenesis                            | 1                                          | 208                   | 0.009973627 |
| GO:0017168                 | 5-oxoprolinase (ATP-hydrolyzing) activity                | 1                                          | 208                   | 0.009973627 |
| GO:0019107                 | myristoyltransferase activity                            | 1                                          | 208                   | 0.009973627 |
| GO:0030981                 | cortical microtubule cytoskeleton                        | 1                                          | 208                   | 0.009973627 |
| GO:0032153                 | cell division site                                       | 1                                          | 208                   | 0.009973627 |
| GO:0032454                 | histone demethylase activity (H3-K9 specific)            | 1                                          | 208                   | 0.009973627 |
| GO:0042284                 | sphingolipid delta-4 desaturase activity                 | 1                                          | 208                   | 0.009973627 |
| GO:0043224                 | nuclear SCF ubiquitin ligase complex                     | 1                                          | 208                   | 0.009973627 |

| Cluster 6<br>GO identifier<br>(con.) | Description                                                                               | #<br>Associated<br>to the GO<br>in Cluster | Total # in<br>Cluster | p-value     |
|--------------------------------------|-------------------------------------------------------------------------------------------|--------------------------------------------|-----------------------|-------------|
| GO:0043254                           | regulation of protein complex assembly                                                    | 1                                          | 208                   | 0.009973627 |
| GO:0045014                           | negative regulation of transcription by glucose                                           | 1                                          | 208                   | 0.009973627 |
| GO:0048227                           | plasma membrane to endosome transport                                                     | 1                                          | 208                   | 0.009973627 |
| GO:0048281                           | inflorescence morphogenesis                                                               | 1                                          | 208                   | 0.009973627 |
| GO:0048283                           | indeterminate inflorescence morphogenesis                                                 | 1                                          | 208                   | 0.009973627 |
| GO:0000226                           | microtubule cytoskeleton organization                                                     | 2                                          | 208                   | 0.010337946 |
| GO:0005783                           | endoplasmic reticulum                                                                     | 7                                          | 208                   | 0.012061162 |
| GO:0006888                           | ER to Golgi vesicle-mediated transport                                                    | 2                                          | 208                   | 0.012921568 |
| GO:0008536                           | Ran GTPase binding                                                                        | 2                                          | 208                   | 0.012921568 |
| GO:0010051                           | xylem and phloem pattern formation                                                        | 2                                          | 208                   | 0.012921568 |
| GO:0009555                           | pollen development                                                                        | 3                                          | 208                   | 0.013971379 |
| GO:0005986                           | sucrose biosynthetic process                                                              | 2                                          | 208                   | 0.014298978 |
| GO:0048443                           | stamen development                                                                        | 2                                          | 208                   | 0.014298978 |
| GO:0046686                           | response to cadmium ion                                                                   | 7                                          | 208                   | 0.014901001 |
| GO:0000166                           | nucleotide binding                                                                        | 6                                          | 208                   | 0.015999951 |
| GO:0009707                           | chloroplast outer membrane                                                                | 2                                          | 208                   | 0.018748861 |
| GO:0030163                           | protein catabolic process                                                                 | 2                                          | 208                   | 0.018748861 |
| GO:0003938                           | IMP dehydrogenase activity                                                                | 1                                          | 208                   | 0.019749255 |
| GO:0003975                           | UDP-N-acetylglucosamine-dolichyl-phosphate N-acetylglucosaminophosphotransferase activity | 1                                          | 208                   | 0.019749255 |
| GO:0004379                           | glycylpeptide N-tetradecanoyltransferase activity                                         | 1                                          | 208                   | 0.019749255 |
| GO:0005080                           | protein kinase C binding                                                                  | 1                                          | 208                   | 0.019749255 |
| GO:0005098                           | RAN GTPase activator activity                                                             | 1                                          | 208                   | 0.019749255 |
| GO:0008676                           | 3-deoxy-8-phosphooctulonate synthase activity                                             | 1                                          | 208                   | 0.019749255 |
| GO:0009590                           | detection of gravity                                                                      | 1                                          | 208                   | 0.019749255 |
| GO:0010306                           | rhamnogalacturonan II biosynthetic process                                                | 1                                          | 208                   | 0.019749255 |
| GO:0010317                           | pyrophosphate-dependent phosphofructokinase complex, alpha-subunit complex                | 1                                          | 208                   | 0.019749255 |
| GO:0010359                           | regulation of anion channel activity                                                      | 1                                          | 208                   | 0.019749255 |
| GO:0010445                           | nuclear dicing body                                                                       | 1                                          | 208                   | 0.019749255 |
| GO:0010480                           | microsporocyte differentiation                                                            | 1                                          | 208                   | 0.019749255 |
| GO:0016303                           | 1-phosphatidylinositol-3-kinase activity                                                  | 1                                          | 208                   | 0.019749255 |
| GO:0017151                           | DEAD/H-box RNA helicase binding                                                           | 1                                          | 208                   | 0.019749255 |
| GO:0030198                           | extracellular matrix organization                                                         | 1                                          | 208                   | 0.019749255 |
| GO:0031119                           | tRNA pseudouridine synthesis                                                              | 1                                          | 208                   | 0.019749255 |
| GO:0032776                           | DNA methylation on cytosine                                                               | 1                                          | 208                   | 0.019749255 |
| GO:0033169                           | histone H3-K9 demethylation                                                               | 1                                          | 208                   | 0.019749255 |
| GO:0047958                           | glycine:2-oxoglutarate aminotransferase activity                                          | 1                                          | 208                   | 0.019749255 |
| GO:0048455                           | stamen formation                                                                          | 1                                          | 208                   | 0.019749255 |
| GO:0052543                           | callose deposition in cell wall                                                           | 1                                          | 208                   | 0.019749255 |
| GO:0006461                           | protein complex assembly                                                                  | 2                                          | 208                   | 0.020331418 |
| GO:0010119                           | regulation of stomatal movement                                                           | 2                                          | 208                   | 0.020331418 |
| GO:0005488                           | binding                                                                                   | 9                                          | 208                   | 0.020393216 |
| GO:0016887                           | ATPase activity                                                                           | 4                                          | 208                   | 0.021693097 |
| GO:0006886                           | intracellular protein transport                                                           | 4                                          | 208                   | 0.022821847 |
| GO:0006418                           | tRNA aminoacylation for protein translation                                               | 2                                          | 208                   | 0.023633949 |
| GO:0009816                           | defense response to bacterium, incompatible interaction                                   | 2                                          | 208                   | 0.023633949 |
| GO:0015992                           | proton transport                                                                          | 2                                          | 208                   | 0.025350238 |
| GO:0006810                           | transport                                                                                 | 7                                          | 208                   | 0.026348541 |
| GO:0003743                           | translation initiation factor activity                                                    | 3                                          | 208                   | 0.027586625 |
| GO:0008565                           | protein transporter activity                                                              | 3                                          | 208                   | 0.028519595 |
| GO:0009507                           | chloroplast                                                                               | 30                                         | 208                   | 0.028861089 |

| Cluster 6<br>GO identifier<br>(con.) | Description                                                      | #<br>Associated<br>to the GO<br>in Cluster | Total # in<br>Cluster | p-value     |
|--------------------------------------|------------------------------------------------------------------|--------------------------------------------|-----------------------|-------------|
| GO:0000049                           | tRNA binding                                                     | 1                                          | 208                   | 0.029329818 |
| GO:0000257                           | nitrilase activity                                               | 1                                          | 208                   | 0.029329818 |
| GO:0001671                           | ATPase activator activity                                        | 1                                          | 208                   | 0.029329818 |
| GO:0003923                           | GPI-anchor transamidase activity                                 | 1                                          | 208                   | 0.029329818 |
| GO:0004021                           | L-alanine:2-oxoglutarate aminotransferase activity               | 1                                          | 208                   | 0.029329818 |
| GO:0004614                           | phosphoglucomutase activity                                      | 1                                          | 208                   | 0.029329818 |
| GO:0005267                           | potassium channel activity                                       | 1                                          | 208                   | 0.029329818 |
| GO:0005663                           | DNA replication factor C complex                                 | 1                                          | 208                   | 0.029329818 |
| GO:0005719                           | nuclear euchromatin                                              | 1                                          | 208                   | 0.029329818 |
| GO:0006471                           | protein amino acid ADP-ribosylation                              | 1                                          | 208                   | 0.029329818 |
| GO:0008361                           | regulation of cell size                                          | 1                                          | 208                   | 0.029329818 |
| GO:0008428                           | ribonuclease inhibitor activity                                  | 1                                          | 208                   | 0.029329818 |
| GO:0009920                           | cell plate formation involved in plant-type cell wall biogenesis | 1                                          | 208                   | 0.029329818 |
| GO:0009925                           | basal plasma membrane                                            | 1                                          | 208                   | 0.029329818 |
| GO:0010098                           | suspensor development                                            | 1                                          | 208                   | 0.029329818 |
| GO:0010338                           | leaf formation                                                   | 1                                          | 208                   | 0.029329818 |
| GO:0010599                           | RNA interference, production of lsiRNA                           | 1                                          | 208                   | 0.029329818 |
| GO:0030572                           | phosphatidyltransferase activity                                 | 1                                          | 208                   | 0.029329818 |
| GO:0031048                           | chromatin silencing by small RNA                                 | 1                                          | 208                   | 0.029329818 |
| GO:0035279                           | gene silencing by miRNA, mRNA cleavage                           | 1                                          | 208                   | 0.029329818 |
| GO:0042325                           | regulation of phosphorylation                                    | 1                                          | 208                   | 0.029329818 |
| GO:0045548                           | phenylalanine ammonia-lyase activity                             | 1                                          | 208                   | 0.029329818 |
| GO:0051252                           | regulation of RNA metabolic process                              | 1                                          | 208                   | 0.029329818 |
| GO:0051788                           | response to misfolded protein                                    | 1                                          | 208                   | 0.029329818 |
| GO:0006511                           | ubiquitin-dependent protein catabolic process                    | 5                                          | 208                   | 0.029881239 |
| GO:0004683                           | calmodulin-dependent protein kinase activity                     | 2                                          | 208                   | 0.034511724 |
| GO:0009706                           | chloroplast inner membrane                                       | 2                                          | 208                   | 0.034511724 |
| GO:0010319                           | stromule                                                         | 2                                          | 208                   | 0.034511724 |
| GO:0001653                           | peptide receptor activity                                        | 1                                          | 208                   | 0.03871821  |
| GO:0005093                           | RAB GDP-dissociation inhibitor activity                          | 1                                          | 208                   | 0.03871821  |
| GO:0006751                           | glutathione catabolic process                                    | 1                                          | 208                   | 0.03871821  |
| GO:0010329                           | auxin efflux transmembrane transporter activity                  | 1                                          | 208                   | 0.03871821  |
| GO:0016579                           | protein deubiquitination                                         | 1                                          | 208                   | 0.03871821  |
| GO:0031053                           | primary microRNA processing                                      | 1                                          | 208                   | 0.03871821  |
| GO:0035196                           | gene silencing by miRNA, production of miRNAs                    | 1                                          | 208                   | 0.03871821  |
| GO:0035198                           | miRNA binding                                                    | 1                                          | 208                   | 0.03871821  |
| GO:0043161                           | proteasomal ubiquitin-dependent protein catabolic process        | 1                                          | 208                   | 0.03871821  |
| GO:0043481                           | anthocyanin accumulation in tissues in response to UV light      | 1                                          | 208                   | 0.03871821  |
| GO:0047334                           | diphosphate-fructose-6-phosphate 1-phosphotransferase activity   | 1                                          | 208                   | 0.03871821  |
| GO:0048229                           | gametophyte development                                          | 1                                          | 208                   | 0.03871821  |
| GO:0051258                           | protein polymerization                                           | 1                                          | 208                   | 0.03871821  |
| GO:0016564                           | transcription repressor activity                                 | 2                                          | 208                   | 0.040413185 |
| GO:0006869                           | lipid transport                                                  | 3                                          | 208                   | 0.040704525 |
| GO:0009744                           | response to sucrose stimulus                                     | 2                                          | 208                   | 0.046567088 |
| GO:0048367                           | shoot development                                                | 2                                          | 208                   | 0.046567088 |
| GO:0003883                           | CTP synthase activity                                            | 1                                          | 208                   | 0.04791729  |
| GO:0004040                           | amidase activity                                                 | 1                                          | 208                   | 0.04791729  |
| GO:0005801                           | cis-Golgi network                                                | 1                                          | 208                   | 0.04791729  |
| GO:0008134                           | transcription factor binding                                     | 1                                          | 208                   | 0.04791729  |
| GO:0009113                           | purine base biosynthetic process                                 | 1                                          | 208                   | 0.04791729  |

| Cluster 6<br>GO identifier<br>(con.) | Description                                        | #<br>Associated<br>to the GO<br>in Cluster | Total # in<br>Cluster | p-value     |
|--------------------------------------|----------------------------------------------------|--------------------------------------------|-----------------------|-------------|
| GO:0010358                           | leaf shaping                                       | 1                                          | 208                   | 0.04791729  |
| GO:0016485                           | protein processing                                 | 1                                          | 208                   | 0.04791729  |
| GO:0030117                           | membrane coat                                      | 1                                          | 208                   | 0.04791729  |
| GO:0032012                           | regulation of ARF protein signal transduction      | 1                                          | 208                   | 0.04791729  |
| GO:0045177                           | apical part of cell                                | 1                                          | 208                   | 0.04791729  |
| GO:0048437                           | floral organ development                           | 1                                          | 208                   | 0.04791729  |
| GO:0005215                           | transporter activity                               | 5                                          | 208                   | 0.049034902 |
| GO:0016491                           | oxidoreductase activity                            | 5                                          | 208                   | 0.05027965  |
| GO:0042254                           | ribosome biogenesis                                | 3                                          | 208                   | 0.052058885 |
| GO:0009860                           | pollen tube growth                                 | 2                                          | 208                   | 0.055098779 |
| GO:0000502                           | proteasome complex                                 | 1                                          | 208                   | 0.056929877 |
| GO:0003950                           | NAD+ ADP-ribosyltransferase activity               | 1                                          | 208                   | 0.056929877 |
| GO:0004003                           | ATP-dependent DNA helicase activity                | 1                                          | 208                   | 0.056929877 |
| GO:0005319                           | lipid transporter activity                         | 1                                          | 208                   | 0.056929877 |
| GO:0006164                           | purine nucleotide biosynthetic process             | 1                                          | 208                   | 0.056929877 |
| GO:0006541                           | glutamine metabolic process                        | 1                                          | 208                   | 0.056929877 |
| GO:0009081                           | branched chain family amino acid metabolic process | 1                                          | 208                   | 0.056929877 |
| GO:0009527                           | plastid outer membrane                             | 1                                          | 208                   | 0.056929877 |
| GO:0009880                           | embryonic pattern specification                    | 1                                          | 208                   | 0.056929877 |
| GO:0010011                           | auxin binding                                      | 1                                          | 208                   | 0.056929877 |
| GO:0010268                           | brassinosteroid homeostasis                        | 1                                          | 208                   | 0.056929877 |
| GO:0030176                           | integral to endoplasmic reticulum membrane         | 1                                          | 208                   | 0.056929877 |
| GO:0042147                           | retrograde transport, endosome to Golgi            | 1                                          | 208                   | 0.056929877 |
| GO:0042393                           | histone binding                                    | 1                                          | 208                   | 0.056929877 |
| GO:0045037                           | protein import into chloroplast stroma             | 1                                          | 208                   | 0.056929877 |
| GO:0045038                           | protein import into chloroplast thylakoid membrane | 1                                          | 208                   | 0.056929877 |
| GO:0048528                           | post-embryonic root development                    | 1                                          | 208                   | 0.056929877 |
| GO:0051555                           | flavonol biosynthetic process                      | 1                                          | 208                   | 0.056929877 |
| GO:0016020                           | membrane                                           | 17                                         | 208                   | 0.060769552 |
| GO:0000902                           | cell morphogenesis                                 | 1                                          | 208                   | 0.065758755 |
| GO:0005085                           | guanyl-nucleotide exchange factor activity         | 1                                          | 208                   | 0.065758755 |
| GO:0006342                           | chromatin silencing                                | 1                                          | 208                   | 0.065758755 |
| GO:0009616                           | virus induced gene silencing                       | 1                                          | 208                   | 0.065758755 |
| GO:0015030                           | Cajal body                                         | 1                                          | 208                   | 0.065758755 |
| GO:0016469                           | proton-transporting two-sector ATPase complex      | 1                                          | 208                   | 0.065758755 |
| GO:0048653                           | anther development                                 | 1                                          | 208                   | 0.065758755 |
| GO:0048829                           | root cap development                               | 1                                          | 208                   | 0.065758755 |
| GO:0000175                           | 3'-5'-exoribonuclease activity                     | 1                                          | 208                   | 0.074406669 |
| GO:0004525                           | ribonuclease III activity                          | 1                                          | 208                   | 0.074406669 |
| GO:0006446                           | regulation of translational initiation             | 1                                          | 208                   | 0.074406669 |
| GO:0008142                           | oxysterol binding                                  | 1                                          | 208                   | 0.074406669 |
| GO:0008202                           | steroid metabolic process                          | 1                                          | 208                   | 0.074406669 |
| GO:0009628                           | response to abiotic stimulus                       | 1                                          | 208                   | 0.074406669 |
| GO:0009646                           | response to absence of light                       | 1                                          | 208                   | 0.074406669 |
| GO:0010207                           | photosystem II assembly                            | 1                                          | 208                   | 0.074406669 |
| GO:0030422                           | RNA interference, production of siRNA              | 1                                          | 208                   | 0.074406669 |
| GO:0040007                           | growth                                             | 1                                          | 208                   | 0.074406669 |
| GO:0051087                           | chaperone binding                                  | 1                                          | 208                   | 0.074406669 |
| GO:0005773                           | vacuole                                            | 7                                          | 208                   | 0.078678573 |
| GO:0006979                           | response to oxidative stress                       | 4                                          | 208                   | 0.082393204 |
| GO:0002237                           | response to molecule of bacterial origin           | 1                                          | 208                   | 0.08287633  |
| GO:0004124                           | cysteine synthase activity                         | 1                                          | 208                   | 0.08287633  |

| Cluster 6<br>GO identifier<br>(con.) | Description                                                      | #<br>Associated<br>to the GO<br>in Cluster | Total # in<br>Cluster | p-value     |
|--------------------------------------|------------------------------------------------------------------|--------------------------------------------|-----------------------|-------------|
| GO:0006974                           | response to DNA damage stimulus                                  | 1                                          | 208                   | 0.08287633  |
| GO:0007186                           | G-protein coupled receptor protein signaling pathway             | 1                                          | 208                   | 0.08287633  |
| GO:0010102                           | lateral root morphogenesis                                       | 1                                          | 208                   | 0.08287633  |
| GO:0016070                           | RNA metabolic process                                            | 1                                          | 208                   | 0.08287633  |
| GO:0016559                           | peroxisome fission                                               | 1                                          | 208                   | 0.08287633  |
| GO:0045036                           | protein targeting to chloroplast                                 | 1                                          | 208                   | 0.08287633  |
| GO:0005634                           | nucleus                                                          | 19                                         | 208                   | 0.085092335 |
| GO:0009793                           | embryonic development ending in seed dormancy                    | 5                                          | 208                   | 0.086030057 |
| GO:0003824                           | catalytic activity                                               | 6                                          | 208                   | 0.087760987 |
| GO:0003725                           | double-stranded RNA binding                                      | 1                                          | 208                   | 0.091170412 |
| GO:0004721                           | phosphoprotein phosphatase activity                              | 1                                          | 208                   | 0.091170412 |
| GO:0009574                           | preprophase band                                                 | 1                                          | 208                   | 0.091170412 |
| GO:0010152                           | pollen maturation                                                | 1                                          | 208                   | 0.091170412 |
| GO:0016132                           | brassinosteroid biosynthetic process                             | 1                                          | 208                   | 0.091170412 |
| GO:0019252                           | starch biosynthetic process                                      | 1                                          | 208                   | 0.091170412 |
| GO:0019344                           | cysteine biosynthetic process                                    | 1                                          | 208                   | 0.091170412 |
| GO:0030127                           | COPII vesicle coat                                               | 1                                          | 208                   | 0.091170412 |
| GO:0006396                           | RNA processing                                                   | 2                                          | 208                   | 0.093785914 |
| GO:0007169                           | transmembrane receptor protein tyrosine kinase signaling pathway | 3                                          | 208                   | 0.096741294 |
| GO:0004713                           | protein tyrosine kinase activity                                 | 1                                          | 208                   | 0.099291555 |
| GO:0008541                           | proteasome regulatory particle, lid subcomplex                   | 1                                          | 208                   | 0.099291555 |
| GO:0009699                           | phenylpropanoid biosynthetic process                             | 1                                          | 208                   | 0.099291555 |
| GO:0009750                           | response to fructose stimulus                                    | 1                                          | 208                   | 0.099291555 |
| GO:0010267                           | RNA interference, production of ta-siRNAs                        | 1                                          | 208                   | 0.099291555 |
| GO:0010311                           | lateral root formation                                           | 1                                          | 208                   | 0.099291555 |
| GO:0015935                           | small ribosomal subunit                                          | 1                                          | 208                   | 0.099291555 |
| GO:0030125                           | clathrin vesicle coat                                            | 1                                          | 208                   | 0.099291555 |
| GO:0005618                           | cell wall                                                        | 5                                          | 208                   | 0.102727543 |
| GO:0042742                           | defense response to bacterium                                    | 3                                          | 208                   | 0.104677732 |
| GO:0001522                           | pseudouridine synthesis                                          | 1                                          | 208                   | 0.107242363 |
| GO:0004630                           | phospholipase D activity                                         | 1                                          | 208                   | 0.107242363 |
| GO:0007389                           | pattern specification process                                    | 1                                          | 208                   | 0.107242363 |
| GO:0009534                           | chloroplast thylakoid                                            | 1                                          | 208                   | 0.107242363 |
| GO:0009958                           | positive gravitropism                                            | 1                                          | 208                   | 0.107242363 |
| GO:0010072                           | primary shoot apical meristem specification                      | 1                                          | 208                   | 0.107242363 |
| GO:0010075                           | regulation of meristem growth                                    | 1                                          | 208                   | 0.107242363 |
| GO:0005388                           | calcium-transporting ATPase activity                             | 1                                          | 208                   | 0.115025405 |
| GO:0048767                           | root hair elongation                                             | 1                                          | 208                   | 0.115025405 |
| GO:0000038                           | very-long-chain fatty acid metabolic process                     | 1                                          | 208                   | 0.115025405 |
| GO:0048364                           | root development                                                 | 2                                          | 208                   | 0.11699749  |
| GO:0005740                           | mitochondrial envelope                                           | 1                                          | 208                   | 0.122643218 |
| GO:0006098                           | pentose-phosphate shunt                                          | 1                                          | 208                   | 0.122643218 |
| GO:0006306                           | DNA methylation                                                  | 1                                          | 208                   | 0.122643218 |
| GO:0008601                           | protein phosphatase type 2A regulator activity                   | 1                                          | 208                   | 0.122643218 |
| GO:0009117                           | nucleotide metabolic process                                     | 1                                          | 208                   | 0.122643218 |
| GO:0042335                           | cuticle development                                              | 1                                          | 208                   | 0.122643218 |
| GO:0005516                           | calmodulin binding                                               | 3                                          | 208                   | 0.125530629 |
| GO:0009908                           | flower development                                               | 2                                          | 208                   | 0.126148197 |
| GO:0006468                           | protein amino acid phosphorylation                               | 9                                          | 208                   | 0.126806972 |
| GO:0008152                           | metabolic process                                                | 7                                          | 208                   | 0.127677956 |
| GO:0016301                           | kinase activity                                                  | 9                                          | 208                   | 0.129585557 |



| Cluster 6<br>GO identifier<br>(con.) | Description                                                           | #<br>Associated<br>to the GO<br>in Cluster | Total # in<br>Cluster | p-value     |
|--------------------------------------|-----------------------------------------------------------------------|--------------------------------------------|-----------------------|-------------|
| GO:0005874                           | microtubule                                                           | 1                                          | 208                   | 0.130098303 |
| GO:0009269                           | response to desiccation                                               | 1                                          | 208                   | 0.130098303 |
| GO:0009807                           | lignan biosynthetic process                                           | 1                                          | 208                   | 0.130098303 |
| GO:0009982                           | pseudouridine synthase activity                                       | 1                                          | 208                   | 0.130098303 |
| GO:0010029                           | regulation of seed germination                                        | 1                                          | 208                   | 0.130098303 |
| GO:0046933                           | hydrogen ion transporting ATP synthase activity, rotational mechanism | 1                                          | 208                   | 0.130098303 |
| GO:0048366                           | leaf development                                                      | 2                                          | 208                   | 0.132924188 |
| GO:0016192                           | vesicle-mediated transport                                            | 2                                          | 208                   | 0.135163392 |
| GO:0006626                           | protein targeting to mitochondrion                                    | 1                                          | 208                   | 0.13739313  |
| GO:0009504                           | cell plate                                                            | 1                                          | 208                   | 0.13739313  |
| GO:0009532                           | plastid stroma                                                        | 1                                          | 208                   | 0.13739313  |
| GO:0010027                           | thylakoid membrane organization                                       | 1                                          | 208                   | 0.13739313  |
| GO:0005576                           | extracellular region                                                  | 2                                          | 208                   | 0.139609609 |
| GO:0009826                           | unidimensional cell growth                                            | 2                                          | 208                   | 0.141815677 |
| GO:0000271                           | polysaccharide biosynthetic process                                   | 1                                          | 208                   | 0.144530136 |
| GO:0005778                           | peroxisomal membrane                                                  | 1                                          | 208                   | 0.144530136 |
| GO:0009630                           | gravitropism                                                          | 1                                          | 208                   | 0.144530136 |
| GO:0009934                           | regulation of meristem organization                                   | 1                                          | 208                   | 0.144530136 |
| GO:0046961                           | proton-transporting ATPase activity, rotational mechanism             | 1                                          | 208                   | 0.144530136 |
| GO:0005524                           | ATP binding                                                           | 7                                          | 208                   | 0.145391208 |
| GO:0009058                           | biosynthetic process                                                  | 2                                          | 208                   | 0.150515996 |
| GO:0015031                           | protein transport                                                     | 2                                          | 208                   | 0.150515996 |
| GO:0006807                           | nitrogen compound metabolic process                                   | 1                                          | 208                   | 0.151511724 |
| GO:0008033                           | tRNA processing                                                       | 1                                          | 208                   | 0.151511724 |
| GO:0009556                           | microsporogenesis                                                     | 1                                          | 208                   | 0.151511724 |
| GO:0009749                           | response to glucose stimulus                                          | 1                                          | 208                   | 0.151511724 |
| GO:0010017                           | red or far red light signaling pathway                                | 1                                          | 208                   | 0.151511724 |
| GO:0005829                           | cytosol                                                               | 3                                          | 208                   | 0.152428169 |
| GO:0005622                           | intracellular                                                         | 5                                          | 208                   | 0.153425798 |
| GO:0004674                           | protein serine/threonine kinase activity                              | 3                                          | 208                   | 0.15472602  |
| GO:0005525                           | GTP binding                                                           | 3                                          | 208                   | 0.15586426  |
| GO:0008289                           | lipid binding                                                         | 2                                          | 208                   | 0.156899664 |
| GO:0007010                           | cytoskeleton organization                                             | 1                                          | 208                   | 0.165018105 |
| GO:0051301                           | cell division                                                         | 1                                          | 208                   | 0.165018105 |
| GO:0006397                           | mRNA processing                                                       | 1                                          | 208                   | 0.171547547 |
| GO:0009831                           | plant-type cell wall modification during multidimensional cell growth | 1                                          | 208                   | 0.171547547 |
| GO:0010182                           | sugar mediated signaling                                              | 1                                          | 208                   | 0.171547547 |
| GO:0005819                           | spindle                                                               | 1                                          | 208                   | 0.177930872 |
| GO:0006414                           | translational elongation                                              | 1                                          | 208                   | 0.177930872 |
| GO:0004812                           | aminoacyl-tRNA ligase activity                                        | 1                                          | 208                   | 0.184170328 |
| GO:0008654                           | phospholipid biosynthetic process                                     | 1                                          | 208                   | 0.184170328 |
| GO:0010150                           | leaf senescence                                                       | 1                                          | 208                   | 0.184170328 |
| GO:0009737                           | response to abscisic acid stimulus                                    | 3                                          | 208                   | 0.186252854 |
| GO:0010228                           | vegetative to reproductive phase transition                           | 1                                          | 208                   | 0.190268133 |
| GO:0006499                           | N-terminal protein myristoylation                                     | 4                                          | 208                   | 0.190423161 |
| GO:0009570                           | chloroplast stroma                                                    | 4                                          | 208                   | 0.192383583 |
| GO:0004888                           | transmembrane receptor activity                                       | 2                                          | 208                   | 0.195694111 |
| GO:0009637                           | response to blue light                                                | 1                                          | 208                   | 0.196226477 |
| GO:0009846                           | pollen germination                                                    | 1                                          | 208                   | 0.196226477 |
| GO:0016071                           | mRNA metabolic process                                                | 1                                          | 208                   | 0.196226477 |

| Cluster 6<br>GO identifier<br>(con.) | Description                                                      | #<br>Associated<br>to the GO<br>in Cluster | Total # in<br>Cluster | p-value     |
|--------------------------------------|------------------------------------------------------------------|--------------------------------------------|-----------------------|-------------|
| GO:0030154                           | cell differentiation                                             | 1                                          | 208                   | 0.196226477 |
| GO:0000145                           | exocyst                                                          | 1                                          | 208                   | 0.202047517 |
| GO:0003682                           | chromatin binding                                                | 1                                          | 208                   | 0.202047517 |
| GO:0005732                           | small nucleolar ribonucleoprotein complex                        | 1                                          | 208                   | 0.202047517 |
| GO:0006364                           | rRNA processing                                                  | 1                                          | 208                   | 0.202047517 |
| GO:0008283                           | cell proliferation                                               | 1                                          | 208                   | 0.202047517 |
| GO:0009909                           | regulation of flower development                                 | 1                                          | 208                   | 0.202047517 |
| GO:0009911                           | positive regulation of flower development                        | 1                                          | 208                   | 0.202047517 |
| GO:0005777                           | peroxisome                                                       | 2                                          | 208                   | 0.204234749 |
| GO:0048046                           | apoplast                                                         | 3                                          | 208                   | 0.211704539 |
| GO:0008017                           | microtubule binding                                              | 1                                          | 208                   | 0.21328618  |
| GO:0009535                           | chloroplast thylakoid membrane                                   | 3                                          | 208                   | 0.215178789 |
| GO:0009853                           | photorespiration                                                 | 1                                          | 208                   | 0.218707979 |
| GO:0009639                           | response to red or far red light                                 | 1                                          | 208                   | 0.224000825 |
| GO:0009828                           | plant-type cell wall loosening                                   | 1                                          | 208                   | 0.224000825 |
| GO:0016757                           | transferase activity, transferring glycosyl groups               | 3                                          | 208                   | 0.226765562 |
| GO:0010224                           | response to UV-B                                                 | 1                                          | 208                   | 0.234207707 |
| GO:0035091                           | phosphoinositide binding                                         | 1                                          | 208                   | 0.239125698 |
| GO:0003924                           | GTPase activity                                                  | 1                                          | 208                   | 0.243922647 |
| GO:0010583                           | response to cyclopentenone                                       | 1                                          | 208                   | 0.243922647 |
| GO:0006629                           | lipid metabolic process                                          | 2                                          | 208                   | 0.249636076 |
| GO:0009658                           | chloroplast organization                                         | 1                                          | 208                   | 0.253161042 |
| GO:0009524                           | phragmoplast                                                     | 1                                          | 208                   | 0.257606232 |
| GO:0009845                           | seed germination                                                 | 1                                          | 208                   | 0.257606232 |
| GO:0006260                           | DNA replication                                                  | 1                                          | 208                   | 0.261937874 |
| GO:0009738                           | abscisic acid mediated signaling                                 | 1                                          | 208                   | 0.261937874 |
| GO:0004842                           | ubiquitin-protein ligase activity                                | 2                                          | 208                   | 0.272471955 |
| GO:0019825                           | oxygen binding                                                   | 2                                          | 208                   | 0.272887554 |
| GO:0042803                           | protein homodimerization activity                                | 1                                          | 208                   | 0.274269477 |
| GO:0006813                           | potassium ion transport                                          | 1                                          | 208                   | 0.278164775 |
| GO:0009735                           | response to cytokinin stimulus                                   | 1                                          | 208                   | 0.28195533  |
| GO:0003899                           | DNA-directed RNA polymerase activity                             | 1                                          | 208                   | 0.28922895  |
| GO:0006633                           | fatty acid biosynthetic process                                  | 1                                          | 208                   | 0.296103581 |
| GO:0006350                           | transcription                                                    | 1                                          | 208                   | 0.299395316 |
| GO:0006334                           | nucleosome assembly                                              | 1                                          | 208                   | 0.305695514 |
| GO:0003779                           | actin binding                                                    | 1                                          | 208                   | 0.308707067 |
| GO:0009624                           | response to nematode                                             | 1                                          | 208                   | 0.31162828  |
| GO:0005834                           | heterotrimeric G-protein complex                                 | 1                                          | 208                   | 0.314460646 |
| GO:0050832                           | defense response to fungus                                       | 1                                          | 208                   | 0.314460646 |
| GO:0006413                           | translational initiation                                         | 1                                          | 208                   | 0.319864705 |
| GO:0008415                           | acyltransferase activity                                         | 1                                          | 208                   | 0.329670071 |
| GO:0016567                           | protein ubiquitination                                           | 1                                          | 208                   | 0.331920599 |
| GO:0046658                           | anchored to plasma membrane                                      | 1                                          | 208                   | 0.331920599 |
| GO:0007264                           | small GTPase mediated signal transduction                        | 1                                          | 208                   | 0.336190088 |
| GO:0017111                           | nucleoside-triphosphatase activity                               | 1                                          | 208                   | 0.342034872 |
| GO:0004601                           | peroxidase activity                                              | 1                                          | 208                   | 0.343839012 |
| GO:0006812                           | cation transport                                                 | 1                                          | 208                   | 0.343839012 |
| GO:0009055                           | electron carrier activity                                        | 1                                          | 208                   | 0.355851537 |
| GO:0006281                           | DNA repair                                                       | 1                                          | 208                   | 0.358224343 |
| GO:0006950                           | response to stress                                               | 1                                          | 208                   | 0.366116843 |
| GO:0042626                           | ATPase activity, coupled to transmembrane movement of substances | 1                                          | 208                   | 0.367299031 |

| Cluster 6<br>GO identifier<br>(con.) | Description                      | #<br>Associated<br>to the GO<br>in Cluster | Total # in<br>Cluster | p-value     |
|--------------------------------------|----------------------------------|--------------------------------------------|-----------------------|-------------|
| GO:0008194                           | UDP-glycosyltransferase activity | 1                                          | 208                   | 0.367817815 |
| GO:0030528                           | transcription regulator activity | 1                                          | 208                   | 0.368289589 |
| GO:0009408                           | response to heat                 | 1                                          | 208                   | 0.369973712 |

### Cluster 6

| <u>GO Identifier</u> | <u>#Loci</u> | <u>Associated Loci (Left to Right)</u> |           |           |           |           |           |
|----------------------|--------------|----------------------------------------|-----------|-----------|-----------|-----------|-----------|
| GO:0000038           | 1            | AT1G19440                              |           |           |           |           |           |
| GO:0000049           | 1            | AT2G40660                              |           |           |           |           |           |
| GO:0000072           | 1            | AT3G63130                              |           |           |           |           |           |
| GO:0000103           | 2            | AT1G19920                              | AT4G14680 |           |           |           |           |
| GO:0000145           | 1            | AT3G10380                              |           |           |           |           |           |
| GO:0000148           | 2            | AT3G07160                              | AT5G13000 |           |           |           |           |
| GO:0000166           | 6            | AT1G67120                              | AT2G33340 | AT2G43770 | AT3G18060 | AT4G04940 | AT5G11240 |
| GO:0000175           | 1            | AT3G46210                              |           |           |           |           |           |
| GO:0000226           | 2            | AT1G20090                              | AT2G35630 |           |           |           |           |
| GO:0000257           | 1            | AT4G08790                              |           |           |           |           |           |
| GO:0000271           | 1            | AT3G57220                              |           |           |           |           |           |
| GO:0000502           | 1            | AT4G38630                              |           |           |           |           |           |
| GO:0000902           | 1            | AT1G20090                              |           |           |           |           |           |
| GO:0000910           | 3            | AT1G01040                              | AT2G35630 | AT3G63130 |           |           |           |
| GO:0001522           | 1            | AT3G04820                              |           |           |           |           |           |
| GO:0001653           | 1            | AT4G38630                              |           |           |           |           |           |
| GO:0001671           | 1            | AT3G12050                              |           |           |           |           |           |
| GO:0002237           | 1            | AT4G03190                              |           |           |           |           |           |
| GO:0003682           | 1            | AT1G74560                              |           |           |           |           |           |
| GO:0003725           | 1            | AT1G01040                              |           |           |           |           |           |
| GO:0003735           | 14           | AT1G67430                              | AT2G32060 | AT3G47370 | AT3G52580 | AT3G60245 | AT3G60770 |
|                      |              | AT4G31700                              | AT4G35490 | AT4G39200 | AT5G09510 | AT5G27770 | AT5G39740 |
|                      |              | AT5G57290                              | AT5G61170 |           |           |           |           |
| GO:0003743           | 3            | AT1G21160                              | AT1G65220 | AT4G20980 |           |           |           |
| GO:0003779           | 1            | AT3G57410                              |           |           |           |           |           |
| GO:0003824           | 6            | AT1G19440                              | AT1G50110 | AT1G75280 | AT2G43400 | AT3G03990 | AT4G29120 |
| GO:0003843           | 2            | AT3G07160                              | AT5G13000 |           |           |           |           |
| GO:0003883           | 1            | AT3G12670                              |           |           |           |           |           |
| GO:0003899           | 1            | AT5G60040                              |           |           |           |           |           |
| GO:0003922           | 1            | AT1G63660                              |           |           |           |           |           |
| GO:0003923           | 1            | AT5G19130                              |           |           |           |           |           |
| GO:0003924           | 1            | AT4G33650                              |           |           |           |           |           |
| GO:0003938           | 1            | AT1G16350                              |           |           |           |           |           |
| GO:0003950           | 1            | AT2G31320                              |           |           |           |           |           |
| GO:0003975           | 1            | AT3G57220                              |           |           |           |           |           |
| GO:0004003           | 1            | AT1G08840                              |           |           |           |           |           |
| GO:0004021           | 1            | AT1G70580                              |           |           |           |           |           |
| GO:0004040           | 1            | AT5G09420                              |           |           |           |           |           |
| GO:0004124           | 1            | AT3G04940                              |           |           |           |           |           |
| GO:0004170           | 1            | AT3G46940                              |           |           |           |           |           |
| GO:0004379           | 1            | AT5G57020                              |           |           |           |           |           |
| GO:0004525           | 1            | AT1G01040                              |           |           |           |           |           |
| GO:0004601           | 1            | AT2G39040                              |           |           |           |           |           |
| GO:0004614           | 1            | AT5G51820                              |           |           |           |           |           |
| GO:0004630           | 1            | AT4G11850                              |           |           |           |           |           |
| GO:0004674           | 3            | AT1G75640                              | AT2G26730 | AT5G65700 |           |           |           |
| GO:0004683           | 2            | AT3G20410                              | AT4G23650 |           |           |           |           |
| GO:0004713           | 1            | AT5G59010                              |           |           |           |           |           |
| GO:0004721           | 1            | AT2G42810                              |           |           |           |           |           |

**Cluster 6 (con.)**

| <b>GO Identifier</b> | <b>#Loci</b> | <b>Associated Loci (Left to Right)</b> |           |           |           |           |           |
|----------------------|--------------|----------------------------------------|-----------|-----------|-----------|-----------|-----------|
| GO:0004781           | 2            | AT1G19920                              | AT4G14680 |           |           |           |           |
| GO:0004812           | 1            | AT3G04600                              |           |           |           |           |           |
| GO:0004842           | 2            | AT3G02260                              | AT4G03190 |           |           |           |           |
| GO:0004888           | 2            | AT2G16640                              | AT5G44510 |           |           |           |           |
| GO:0005080           | 1            | AT3G56490                              |           |           |           |           |           |
| GO:0005085           | 1            | AT3G60860                              |           |           |           |           |           |
| GO:0005093           | 1            | AT2G44100                              |           |           |           |           |           |
| GO:0005098           | 1            | AT3G63130                              |           |           |           |           |           |
| GO:0005201           | 1            | AT3G07390                              |           |           |           |           |           |
| GO:0005215           | 5            | AT1G30690                              | AT1G72150 | AT1G73590 | AT3G07100 | AT3G51670 |           |
| GO:0005267           | 1            | AT1G04690                              |           |           |           |           |           |
| GO:0005319           | 1            | AT1G19800                              |           |           |           |           |           |
| GO:0005388           | 1            | AT4G29900                              |           |           |           |           |           |
| GO:0005488           | 9            | AT1G75280                              | AT2G01690 | AT2G32730 | AT3G02260 | AT3G52140 | AT4G17270 |
|                      |              | AT4G23540                              | AT5G59010 | AT5G64270 |           |           |           |
| GO:0005516           | 3            | AT1G51710                              | AT2G36910 | AT4G29900 |           |           |           |
| GO:0005524           | 7            | AT1G67120                              | AT1G75640 | AT2G26730 | AT3G04600 | AT5G44510 | AT5G59010 |
|                      |              | AT5G65700                              |           |           |           |           |           |
| GO:0005525           | 3            | AT1G20090                              | AT4G33650 | AT5G65270 |           |           |           |
| GO:0005576           | 2            | AT3G03220                              | AT3G07390 |           |           |           |           |
| GO:0005618           | 5            | AT2G33340                              | AT3G44110 | AT3G47370 | AT3G60770 | AT5G43010 |           |
| GO:0005622           | 5            | AT1G04850                              | AT1G27310 | AT1G27970 | AT1G80500 | AT3G60860 |           |
| GO:0005634           | 19           | AT1G01040                              | AT1G12310 | AT1G15750 | AT1G20090 | AT1G27310 | AT1G27970 |
|                      |              | AT1G74560                              | AT1G76860 | AT2G31320 | AT2G32060 | AT2G40290 | AT2G42810 |
|                      |              | AT2G43630                              | AT4G03190 | AT4G30080 | AT4G38630 | AT5G43010 | AT5G60040 |
|                      |              | AT5G62190                              |           |           |           |           |           |
| GO:0005635           | 4            | AT1G27310                              | AT1G27970 | AT2G42810 | AT3G63130 |           |           |
| GO:0005663           | 1            | AT1G21690                              |           |           |           |           |           |
| GO:0005719           | 1            | AT2G27040                              |           |           |           |           |           |
| GO:0005730           | 14           | AT1G20090                              | AT1G21690 | AT1G61730 | AT1G67430 | AT2G27040 | AT3G44110 |
|                      |              | AT3G47370                              | AT3G58510 | AT3G60770 | AT4G31700 | AT5G09510 | AT5G27770 |
|                      |              | AT5G39740                              | AT5G62190 |           |           |           |           |
| GO:0005732           | 1            | AT1G76860                              |           |           |           |           |           |
| GO:0005737           | 11           | AT1G20090                              | AT1G27310 | AT1G63660 | AT1G73590 | AT1G74560 | AT1G79500 |
|                      |              | AT2G37040                              | AT2G42810 | AT3G12050 | AT3G59990 | AT5G37830 |           |
| GO:0005740           | 1            | AT2G43400                              |           |           |           |           |           |
| GO:0005773           | 7            | AT1G52740                              | AT1G67430 | AT1G72150 | AT4G23650 | AT5G11700 | AT5G39740 |
|                      |              | AT5G61170                              |           |           |           |           |           |
| GO:0005777           | 2            | AT1G70580                              | AT3G58510 |           |           |           |           |
| GO:0005778           | 1            | AT2G42770                              |           |           |           |           |           |
| GO:0005783           | 7            | AT1G22200                              | AT1G65020 | AT2G16760 | AT2G31360 | AT3G03330 | AT3G57220 |
|                      |              | AT5G19130                              |           |           |           |           |           |
| GO:0005801           | 1            | AT1G51160                              |           |           |           |           |           |
| GO:0005819           | 1            | AT2G35630                              |           |           |           |           |           |
| GO:0005829           | 3            | AT3G04600                              | AT4G33650 | AT5G57020 |           |           |           |
| GO:0005834           | 1            | AT2G43770                              |           |           |           |           |           |
| GO:0005840           | 9            | AT1G67430                              | AT3G60245 | AT4G35490 | AT4G39200 | AT5G27770 | AT5G39740 |
|                      |              | AT5G57020                              | AT5G57290 | AT5G61170 |           |           |           |
| GO:0005874           | 1            | AT2G35630                              |           |           |           |           |           |
| GO:0005886           | 46           | AT1G04690                              | AT1G12310 | AT1G20090 | AT1G27970 | AT1G30690 | AT1G65020 |
|                      |              | AT1G72150                              | AT1G73180 | AT1G73590 | AT1G75280 | AT1G75640 | AT1G75990 |
|                      |              | AT2G01690                              | AT2G26730 | AT2G36910 | AT2G37050 | AT2G45820 | AT3G03330 |
|                      |              | AT3G07160                              | AT3G07390 | AT3G10380 | AT3G17210 | AT3G20410 | AT3G25800 |
|                      |              | AT3G44110                              | AT3G51670 | AT3G52140 | AT3G56490 | AT3G57220 | AT3G58510 |
|                      |              | AT3G63130                              | AT4G11850 | AT4G17270 | AT4G23460 | AT4G23650 | AT4G29900 |
|                      |              | AT4G31700                              | AT4G37190 | AT5G09510 | AT5G13000 | AT5G27770 | AT5G39740 |
|                      |              | AT5G59010                              | AT5G62670 | AT5G65270 | AT5G65700 |           |           |
| GO:0005986           | 2            | AT1G66430                              | AT4G10260 |           |           |           |           |
| GO:0006014           | 2            | AT1G66430                              | AT4G10260 |           |           |           |           |

**Cluster 6 (con.)**

| <b>GO Identifier</b> | <b>#Loci</b> | <b>Associated Loci (Left to Right)</b> |           |           |           |           |           |
|----------------------|--------------|----------------------------------------|-----------|-----------|-----------|-----------|-----------|
| GO:0006075           | 2            | AT3G07160                              | AT5G13000 |           |           |           |           |
| GO:0006098           | 1            | AT4G29120                              |           |           |           |           |           |
| GO:0006164           | 1            | AT1G63660                              |           |           |           |           |           |
| GO:0006177           | 2            | AT1G16350                              | AT1G63660 |           |           |           |           |
| GO:0006260           | 1            | AT1G08840                              |           |           |           |           |           |
| GO:0006281           | 1            | AT2G31320                              |           |           |           |           |           |
| GO:0006306           | 1            | AT2G27040                              |           |           |           |           |           |
| GO:0006334           | 1            | AT1G74560                              |           |           |           |           |           |
| GO:0006342           | 1            | AT2G27040                              |           |           |           |           |           |
| GO:0006350           | 1            | AT5G60040                              |           |           |           |           |           |
| GO:0006364           | 1            | AT4G04940                              |           |           |           |           |           |
| GO:0006396           | 2            | AT1G01040                              | AT3G46210 |           |           |           |           |
| GO:0006397           | 1            | AT5G64270                              |           |           |           |           |           |
| GO:0006412           | 13           | AT1G67430                              | AT2G32060 | AT2G40290 | AT3G47370 | AT3G52580 | AT3G60245 |
|                      |              | AT3G60770                              | AT4G31700 | AT4G39200 | AT5G09510 | AT5G27770 | AT5G39740 |
|                      |              | AT5G61170                              |           |           |           |           |           |
| GO:0006413           | 1            | AT4G20980                              |           |           |           |           |           |
| GO:0006414           | 1            | AT5G57290                              |           |           |           |           |           |
| GO:0006418           | 2            | AT2G40660                              | AT3G04600 |           |           |           |           |
| GO:0006436           | 1            | AT3G04600                              |           |           |           |           |           |
| GO:0006446           | 1            | AT1G65220                              |           |           |           |           |           |
| GO:0006461           | 2            | AT1G31730                              | AT4G23460 |           |           |           |           |
| GO:0006468           | 9            | AT1G72540                              | AT1G75640 | AT2G23070 | AT2G26730 | AT2G37050 | AT3G20410 |
|                      |              | AT4G23650                              | AT5G59010 | AT5G65700 |           |           |           |
| GO:0006471           | 1            | AT2G31320                              |           |           |           |           |           |
| GO:0006499           | 4            | AT3G20410                              | AT4G23650 | AT5G57020 | AT5G59010 |           |           |
| GO:0006511           | 5            | AT1G75990                              | AT2G32730 | AT4G03190 | AT4G38630 | AT5G43010 |           |
| GO:0006541           | 1            | AT1G63660                              |           |           |           |           |           |
| GO:0006606           | 3            | AT1G27310                              | AT1G27970 | AT3G63130 |           |           |           |
| GO:0006626           | 1            | AT5G09420                              |           |           |           |           |           |
| GO:0006629           | 2            | AT2G31360                              | AT3G61580 |           |           |           |           |
| GO:0006633           | 1            | AT2G31360                              |           |           |           |           |           |
| GO:0006751           | 1            | AT5G37830                              |           |           |           |           |           |
| GO:0006807           | 1            | AT4G08790                              |           |           |           |           |           |
| GO:0006810           | 7            | AT1G30690                              | AT1G51160 | AT1G72150 | AT1G80500 | AT3G07100 | AT3G51670 |
|                      |              | AT5G62670                              |           |           |           |           |           |
| GO:0006812           | 1            | AT5G62670                              |           |           |           |           |           |
| GO:0006813           | 1            | AT1G04690                              |           |           |           |           |           |
| GO:0006869           | 3            | AT1G19800                              | AT4G27160 | AT4G27170 |           |           |           |
| GO:0006886           | 4            | AT1G31730                              | AT2G17790 | AT4G23460 | AT4G24550 |           |           |
| GO:0006888           | 2            | AT1G51160                              | AT1G80500 |           |           |           |           |
| GO:0006913           | 3            | AT1G27310                              | AT1G27970 | AT2G42810 |           |           |           |
| GO:0006950           | 1            | AT2G21620                              |           |           |           |           |           |
| GO:0006974           | 1            | AT4G38630                              |           |           |           |           |           |
| GO:0006979           | 4            | AT1G75280                              | AT2G31320 | AT2G37040 | AT2G39040 |           |           |
| GO:0007010           | 1            | AT3G57410                              |           |           |           |           |           |
| GO:0007169           | 3            | AT1G75640                              | AT2G26730 | AT5G65700 |           |           |           |
| GO:0007186           | 1            | AT2G20890                              |           |           |           |           |           |
| GO:0007264           | 1            | AT5G65270                              |           |           |           |           |           |
| GO:0007389           | 1            | AT4G30080                              |           |           |           |           |           |
| GO:0008017           | 1            | AT2G35630                              |           |           |           |           |           |
| GO:0008026           | 5            | AT1G01040                              | AT3G58510 | AT5G08610 | AT5G61140 | AT5G62190 |           |
| GO:0008033           | 1            | AT1G63660                              |           |           |           |           |           |
| GO:0008134           | 1            | AT1G67120                              |           |           |           |           |           |
| GO:0008142           | 1            | AT3G09300                              |           |           |           |           |           |
| GO:0008152           | 7            | AT1G50110                              | AT1G79500 | AT3G03330 | AT3G20790 | AT4G29120 | AT5G06060 |
|                      |              | AT5G62670                              |           |           |           |           |           |
| GO:0008194           | 1            | AT1G06000                              |           |           |           |           |           |
| GO:0008202           | 1            | AT3G09300                              |           |           |           |           |           |

**Cluster 6 (con.)**

| <b>GO Identifier</b> | <b>#Loci</b> | <b>Associated Loci (Left to Right)</b> |           |           |           |           |           |
|----------------------|--------------|----------------------------------------|-----------|-----------|-----------|-----------|-----------|
| GO:0008283           | 1            | AT1G74560                              |           |           |           |           |           |
| GO:0008289           | 2            | AT4G27160                              | AT4G27170 |           |           |           |           |
| GO:0008361           | 1            | AT2G36910                              |           |           |           |           |           |
| GO:0008415           | 1            | AT1G19440                              |           |           |           |           |           |
| GO:0008428           | 1            | AT5G16450                              |           |           |           |           |           |
| GO:0008536           | 2            | AT1G27310                              | AT1G27970 |           |           |           |           |
| GO:0008540           | 3            | AT2G32730                              | AT4G38630 | AT5G43010 |           |           |           |
| GO:0008541           | 1            | AT1G75990                              |           |           |           |           |           |
| GO:0008565           | 3            | AT1G27310                              | AT1G27970 | AT4G24550 |           |           |           |
| GO:0008601           | 1            | AT3G25800                              |           |           |           |           |           |
| GO:0008654           | 1            | AT1G13560                              |           |           |           |           |           |
| GO:0008676           | 1            | AT1G79500                              |           |           |           |           |           |
| GO:0009055           | 1            | AT2G43400                              |           |           |           |           |           |
| GO:0009058           | 2            | AT1G63660                              | AT4G01210 |           |           |           |           |
| GO:0009081           | 1            | AT1G50110                              |           |           |           |           |           |
| GO:0009113           | 1            | AT1G63660                              |           |           |           |           |           |
| GO:0009117           | 1            | AT1G63660                              |           |           |           |           |           |
| GO:0009269           | 1            | AT2G21620                              |           |           |           |           |           |
| GO:0009394           | 1            | AT3G46940                              |           |           |           |           |           |
| GO:0009408           | 1            | AT4G38630                              |           |           |           |           |           |
| GO:0009504           | 1            | AT3G63130                              |           |           |           |           |           |
| GO:0009507           | 30           | AT1G08640                              | AT1G08840 | AT1G19800 | AT1G19920 | AT1G33810 | AT1G50030 |
|                      |              | AT1G61730                              | AT1G66430 | AT1G70580 | AT1G72150 | AT1G72540 | AT2G20890 |
|                      |              | AT2G23070                              | AT2G33340 | AT2G37020 | AT2G42770 | AT2G43630 | AT3G52140 |
|                      |              | AT3G60770                              | AT3G63130 | AT4G14680 | AT4G20980 | AT4G31700 | AT4G33650 |
|                      |              | AT5G08610                              | AT5G10540 | AT5G24690 | AT5G44510 | AT5G51820 | AT5G64270 |
| GO:0009524           | 1            | AT2G35630                              |           |           |           |           |           |
| GO:0009527           | 1            | AT2G20890                              |           |           |           |           |           |
| GO:0009528           | 1            | AT2G20890                              |           |           |           |           |           |
| GO:0009532           | 1            | AT2G20890                              |           |           |           |           |           |
| GO:0009534           | 1            | AT2G20890                              |           |           |           |           |           |
| GO:0009535           | 3            | AT1G33810                              | AT2G20890 | AT2G43630 |           |           |           |
| GO:0009555           | 3            | AT3G07160                              | AT3G07610 | AT4G38630 |           |           |           |
| GO:0009556           | 1            | AT3G07160                              |           |           |           |           |           |
| GO:0009570           | 4            | AT1G66430                              | AT1G70580 | AT2G20890 | AT5G51820 |           |           |
| GO:0009574           | 1            | AT2G35630                              |           |           |           |           |           |
| GO:0009590           | 1            | AT5G51820                              |           |           |           |           |           |
| GO:0009616           | 1            | AT1G01040                              |           |           |           |           |           |
| GO:0009624           | 1            | AT2G36910                              |           |           |           |           |           |
| GO:0009628           | 1            | AT2G31320                              |           |           |           |           |           |
| GO:0009630           | 1            | AT1G73590                              |           |           |           |           |           |
| GO:0009637           | 1            | AT2G36910                              |           |           |           |           |           |
| GO:0009639           | 1            | AT2G36910                              |           |           |           |           |           |
| GO:0009640           | 3            | AT1G73590                              | AT2G36910 | AT3G02260 |           |           |           |
| GO:0009646           | 1            | AT2G43400                              |           |           |           |           |           |
| GO:0009658           | 1            | AT4G33650                              |           |           |           |           |           |
| GO:0009699           | 1            | AT2G37040                              |           |           |           |           |           |
| GO:0009706           | 2            | AT1G19800                              | AT5G24690 |           |           |           |           |
| GO:0009707           | 2            | AT1G19800                              | AT2G16640 |           |           |           |           |
| GO:0009733           | 7            | AT1G15750                              | AT2G36910 | AT3G02260 | AT3G07390 | AT4G03190 | AT4G30080 |
|                      |              | AT4G38630                              |           |           |           |           |           |
| GO:0009735           | 1            | AT4G38630                              |           |           |           |           |           |
| GO:0009737           | 3            | AT1G03880                              | AT2G31320 | AT4G38630 |           |           |           |
| GO:0009738           | 1            | AT4G23650                              |           |           |           |           |           |
| GO:0009744           | 2            | AT1G20950                              | AT4G38630 |           |           |           |           |
| GO:0009749           | 1            | AT1G20950                              |           |           |           |           |           |
| GO:0009750           | 1            | AT1G20950                              |           |           |           |           |           |
| GO:0009793           | 5            | AT1G08840                              | AT1G21690 | AT1G50030 | AT3G12670 | AT4G11850 |           |
| GO:0009807           | 1            | AT4G23690                              |           |           |           |           |           |

**Cluster 6 (con.)**

| <b>GO Identifier</b> | <b>#Loci</b> | <b>Associated Loci (Left to Right)</b> |           |           |           |           |           |
|----------------------|--------------|----------------------------------------|-----------|-----------|-----------|-----------|-----------|
| GO:0009816           | 2            | AT2G27040                              | AT4G11850 |           |           |           |           |
| GO:0009826           | 2            | AT3G03220                              | AT5G05690 |           |           |           |           |
| GO:0009828           | 1            | AT3G03220                              |           |           |           |           |           |
| GO:0009831           | 1            | AT3G03220                              |           |           |           |           |           |
| GO:0009845           | 1            | AT1G03880                              |           |           |           |           |           |
| GO:0009846           | 1            | AT3G10380                              |           |           |           |           |           |
| GO:0009853           | 1            | AT1G70580                              |           |           |           |           |           |
| GO:0009860           | 2            | AT1G20090                              | AT3G10380 |           |           |           |           |
| GO:0009880           | 1            | AT1G01040                              |           |           |           |           |           |
| GO:0009908           | 2            | AT1G01040                              | AT3G07610 |           |           |           |           |
| GO:0009909           | 1            | AT1G52740                              |           |           |           |           |           |
| GO:0009911           | 1            | AT5G05690                              |           |           |           |           |           |
| GO:0009920           | 1            | AT2G35630                              |           |           |           |           |           |
| GO:0009925           | 1            | AT1G73590                              |           |           |           |           |           |
| GO:0009926           | 3            | AT1G73590                              | AT2G36910 | AT3G02260 |           |           |           |
| GO:0009934           | 1            | AT5G65700                              |           |           |           |           |           |
| GO:0009941           | 10           | AT1G08640                              | AT1G19800 | AT1G33810 | AT1G67120 | AT2G20890 | AT2G42770 |
|                      |              | AT2G43630                              | AT4G33650 | AT5G24690 | AT5G51820 |           |           |
| GO:0009958           | 1            | AT2G36910                              |           |           |           |           |           |
| GO:0009982           | 1            | AT3G04820                              |           |           |           |           |           |
| GO:0010011           | 1            | AT4G03190                              |           |           |           |           |           |
| GO:0010017           | 1            | AT2G42810                              |           |           |           |           |           |
| GO:0010027           | 1            | AT2G20890                              |           |           |           |           |           |
| GO:0010029           | 1            | AT4G38630                              |           |           |           |           |           |
| GO:0010051           | 2            | AT1G15750                              | AT1G73590 |           |           |           |           |
| GO:0010064           | 1            | AT5G57020                              |           |           |           |           |           |
| GO:0010072           | 1            | AT1G15750                              |           |           |           |           |           |
| GO:0010075           | 1            | AT5G65700                              |           |           |           |           |           |
| GO:0010098           | 1            | AT1G01040                              |           |           |           |           |           |
| GO:0010102           | 1            | AT3G07390                              |           |           |           |           |           |
| GO:0010119           | 2            | AT1G20090                              | AT4G23650 |           |           |           |           |
| GO:0010150           | 1            | AT4G38630                              |           |           |           |           |           |
| GO:0010152           | 1            | AT4G03190                              |           |           |           |           |           |
| GO:0010182           | 1            | AT2G20890                              |           |           |           |           |           |
| GO:0010207           | 1            | AT2G20890                              |           |           |           |           |           |
| GO:0010224           | 1            | AT5G05690                              |           |           |           |           |           |
| GO:0010228           | 1            | AT1G01040                              |           |           |           |           |           |
| GO:0010267           | 1            | AT1G01040                              |           |           |           |           |           |
| GO:0010268           | 1            | AT5G05690                              |           |           |           |           |           |
| GO:0010306           | 1            | AT1G79500                              |           |           |           |           |           |
| GO:0010311           | 1            | AT1G74560                              |           |           |           |           |           |
| GO:0010317           | 1            | AT1G20950                              |           |           |           |           |           |
| GO:0010319           | 2            | AT2G20890                              | AT5G51820 |           |           |           |           |
| GO:0010329           | 1            | AT2G36910                              |           |           |           |           |           |
| GO:0010338           | 1            | AT1G73590                              |           |           |           |           |           |
| GO:0010358           | 1            | AT1G73590                              |           |           |           |           |           |
| GO:0010359           | 1            | AT4G23650                              |           |           |           |           |           |
| GO:0010445           | 1            | AT1G01040                              |           |           |           |           |           |
| GO:0010480           | 1            | AT5G65700                              |           |           |           |           |           |
| GO:0010583           | 1            | AT1G73590                              |           |           |           |           |           |
| GO:0010599           | 1            | AT1G01040                              |           |           |           |           |           |
| GO:0015030           | 1            | AT2G27040                              |           |           |           |           |           |
| GO:0015031           | 2            | AT2G44100                              | AT5G65270 |           |           |           |           |
| GO:0015935           | 1            | AT3G47370                              |           |           |           |           |           |
| GO:0015992           | 2            | AT4G26210                              | AT5G62670 |           |           |           |           |
| GO:0016020           | 17           | AT1G04690                              | AT1G13560 | AT1G67430 | AT1G72150 | AT1G73590 | AT1G75990 |
|                      |              | AT2G16640                              | AT2G31360 | AT3G02260 | AT3G47370 | AT3G61580 | AT4G31700 |
|                      |              | AT4G33650                              | AT4G38630 | AT5G27770 | AT5G62670 | AT5G65270 |           |
| GO:0016070           | 1            | AT5G62190                              |           |           |           |           |           |

**Cluster 6 (con.)**

| <b>GO Identifier</b> | <b>#Loci</b> | <b>Associated Loci (Left to Right)</b> |           |           |           |           |           |  |
|----------------------|--------------|----------------------------------------|-----------|-----------|-----------|-----------|-----------|--|
| GO:0016071           | 1            | AT1G76860                              |           |           |           |           |           |  |
| GO:0016132           | 1            | AT5G05690                              |           |           |           |           |           |  |
| GO:0016192           | 2            | AT1G31730                              | AT4G23460 |           |           |           |           |  |
| GO:0016301           | 9            | AT1G66430                              | AT1G72540 | AT1G75640 | AT2G23070 | AT2G37050 | AT3G20410 |  |
|                      |              | AT4G10260                              | AT4G23650 | AT5G65700 |           |           |           |  |
| GO:0016303           | 1            | AT1G50030                              |           |           |           |           |           |  |
| GO:0016469           | 1            | AT4G26210                              |           |           |           |           |           |  |
| GO:0016485           | 1            | AT3G59990                              |           |           |           |           |           |  |
| GO:0016491           | 5            | AT2G31360                              | AT3G03330 | AT3G20790 | AT3G61580 | AT5G06060 |           |  |
| GO:0016559           | 1            | AT4G33650                              |           |           |           |           |           |  |
| GO:0016564           | 2            | AT1G15750                              | AT1G75280 |           |           |           |           |  |
| GO:0016567           | 1            | AT2G33340                              |           |           |           |           |           |  |
| GO:0016579           | 1            | AT1G51710                              |           |           |           |           |           |  |
| GO:0016757           | 3            | AT1G06000                              | AT4G01210 | AT5G13000 |           |           |           |  |
| GO:0016887           | 4            | AT1G21690                              | AT1G67120 | AT5G43010 | AT5G62670 |           |           |  |
| GO:0017111           | 1            | AT1G67120                              |           |           |           |           |           |  |
| GO:0017151           | 1            | AT5G62190                              |           |           |           |           |           |  |
| GO:0017168           | 1            | AT5G37830                              |           |           |           |           |           |  |
| GO:0019107           | 1            | AT5G57020                              |           |           |           |           |           |  |
| GO:0019252           | 1            | AT5G51820                              |           |           |           |           |           |  |
| GO:0019344           | 1            | AT3G04940                              |           |           |           |           |           |  |
| GO:0019575           | 2            | AT1G66430                              | AT4G10260 |           |           |           |           |  |
| GO:0019654           | 2            | AT1G66430                              | AT4G10260 |           |           |           |           |  |
| GO:0019825           | 2            | AT2G27000                              | AT5G05690 |           |           |           |           |  |
| GO:0022625           | 5            | AT1G67430                              | AT3G60245 | AT4G35490 | AT5G27770 | AT5G39740 |           |  |
| GO:0022626           | 10           | AT1G67430                              | AT2G32060 | AT3G47370 | AT3G60770 | AT4G31700 | AT4G39200 |  |
|                      |              | AT5G09510                              | AT5G39740 | AT5G57290 | AT5G61170 |           |           |  |
| GO:0022627           | 8            | AT2G32060                              | AT3G47370 | AT3G52580 | AT3G60770 | AT4G31700 | AT4G39200 |  |
|                      |              | AT5G09510                              | AT5G61170 |           |           |           |           |  |
| GO:0030117           | 1            | AT1G31730                              |           |           |           |           |           |  |
| GO:0030125           | 1            | AT4G24550                              |           |           |           |           |           |  |
| GO:0030127           | 1            | AT3G07100                              |           |           |           |           |           |  |
| GO:0030154           | 1            | AT1G74560                              |           |           |           |           |           |  |
| GO:0030163           | 2            | AT1G75990                              | AT4G38630 |           |           |           |           |  |
| GO:0030176           | 1            | AT2G42810                              |           |           |           |           |           |  |
| GO:0030198           | 1            | AT3G07390                              |           |           |           |           |           |  |
| GO:0030276           | 2            | AT1G31730                              | AT4G23460 |           |           |           |           |  |
| GO:0030422           | 1            | AT1G01040                              |           |           |           |           |           |  |
| GO:0030528           | 1            | AT1G61730                              |           |           |           |           |           |  |
| GO:0030572           | 1            | AT1G13560                              |           |           |           |           |           |  |
| GO:0030981           | 1            | AT2G35630                              |           |           |           |           |           |  |
| GO:0031048           | 1            | AT2G27040                              |           |           |           |           |           |  |
| GO:0031053           | 1            | AT1G01040                              |           |           |           |           |           |  |
| GO:0031119           | 1            | AT3G04820                              |           |           |           |           |           |  |
| GO:0032012           | 1            | AT3G60860                              |           |           |           |           |           |  |
| GO:0032153           | 1            | AT3G63130                              |           |           |           |           |           |  |
| GO:0032454           | 1            | AT3G07610                              |           |           |           |           |           |  |
| GO:0032776           | 1            | AT3G07610                              |           |           |           |           |           |  |
| GO:0033169           | 1            | AT3G07610                              |           |           |           |           |           |  |
| GO:0035091           | 1            | AT4G33650                              |           |           |           |           |           |  |
| GO:0035196           | 1            | AT1G01040                              |           |           |           |           |           |  |
| GO:0035198           | 1            | AT4G30080                              |           |           |           |           |           |  |
| GO:0035279           | 1            | AT1G01040                              |           |           |           |           |           |  |
| GO:0040007           | 1            | AT5G57020                              |           |           |           |           |           |  |
| GO:0042147           | 1            | AT2G17790                              |           |           |           |           |           |  |
| GO:0042254           | 3            | AT3G60245                              | AT4G35490 | AT5G39740 |           |           |           |  |
| GO:0042284           | 1            | AT3G61580                              |           |           |           |           |           |  |
| GO:0042325           | 1            | AT3G25800                              |           |           |           |           |           |  |
| GO:0042335           | 1            | AT1G19440                              |           |           |           |           |           |  |



**Cluster 6 (con.)**

| <b>GO Identifier</b> | <b>#Loci</b> | <b>Associated Loci (Left to Right)</b> |           |           |           |           |           |
|----------------------|--------------|----------------------------------------|-----------|-----------|-----------|-----------|-----------|
| GO:0042393           | 1            | AT1G74560                              |           |           |           |           |           |
| GO:0042626           | 1            | AT2G36910                              |           |           |           |           |           |
| GO:0042742           | 3            | AT1G52740                              | AT3G17210 | AT5G44510 |           |           |           |
| GO:0042803           | 1            | AT1G15750                              |           |           |           |           |           |
| GO:0043161           | 1            | AT4G38630                              |           |           |           |           |           |
| GO:0043224           | 1            | AT4G03190                              |           |           |           |           |           |
| GO:0043254           | 1            | AT1G67120                              |           |           |           |           |           |
| GO:0043481           | 1            | AT2G36910                              |           |           |           |           |           |
| GO:0045014           | 1            | AT4G03190                              |           |           |           |           |           |
| GO:0045036           | 1            | AT2G16640                              |           |           |           |           |           |
| GO:0045037           | 1            | AT2G20890                              |           |           |           |           |           |
| GO:0045038           | 1            | AT2G20890                              |           |           |           |           |           |
| GO:0045177           | 1            | AT1G73590                              |           |           |           |           |           |
| GO:0045548           | 1            | AT2G37040                              |           |           |           |           |           |
| GO:0045735           | 5            | AT1G03880                              | AT1G07750 | AT2G28490 | AT4G27160 | AT4G27170 |           |
| GO:0046658           | 1            | AT3G07390                              |           |           |           |           |           |
| GO:0046686           | 7            | AT1G74560                              | AT1G75280 | AT2G42810 | AT3G12670 | AT3G25800 | AT4G08790 |
|                      |              | AT5G10540                              |           |           |           |           |           |
| GO:0046933           | 1            | AT4G26210                              |           |           |           |           |           |
| GO:0046961           | 1            | AT4G26210                              |           |           |           |           |           |
| GO:0047334           | 1            | AT1G20950                              |           |           |           |           |           |
| GO:0047958           | 1            | AT1G70580                              |           |           |           |           |           |
| GO:0048046           | 3            | AT1G72150                              | AT5G10540 | AT5G51820 |           |           |           |
| GO:0048227           | 1            | AT2G44100                              |           |           |           |           |           |
| GO:0048229           | 1            | AT5G65700                              |           |           |           |           |           |
| GO:0048281           | 1            | AT4G29900                              |           |           |           |           |           |
| GO:0048283           | 1            | AT3G02260                              |           |           |           |           |           |
| GO:0048364           | 2            | AT1G73590                              | AT3G02260 |           |           |           |           |
| GO:0048366           | 2            | AT3G07610                              | AT4G38630 |           |           |           |           |
| GO:0048367           | 2            | AT1G73590                              | AT4G29900 |           |           |           |           |
| GO:0048437           | 1            | AT5G65700                              |           |           |           |           |           |
| GO:0048443           | 2            | AT2G36910                              | AT4G03190 |           |           |           |           |
| GO:0048455           | 1            | AT4G38630                              |           |           |           |           |           |
| GO:0048528           | 1            | AT4G38630                              |           |           |           |           |           |
| GO:0048589           | 2            | AT3G07160                              | AT4G03190 |           |           |           |           |
| GO:0048653           | 1            | AT5G65700                              |           |           |           |           |           |
| GO:0048767           | 1            | AT4G38630                              |           |           |           |           |           |
| GO:0048829           | 1            | AT4G30080                              |           |           |           |           |           |
| GO:0050832           | 1            | AT3G17210                              |           |           |           |           |           |
| GO:0051087           | 1            | AT3G12050                              |           |           |           |           |           |
| GO:0051252           | 1            | AT5G16450                              |           |           |           |           |           |
| GO:0051258           | 1            | AT4G37190                              |           |           |           |           |           |
| GO:0051301           | 1            | AT4G30080                              |           |           |           |           |           |
| GO:0051555           | 1            | AT1G06000                              |           |           |           |           |           |
| GO:0051788           | 1            | AT4G38630                              |           |           |           |           |           |
| GO:0052543           | 1            | AT3G07160                              |           |           |           |           |           |

# Cluster 7

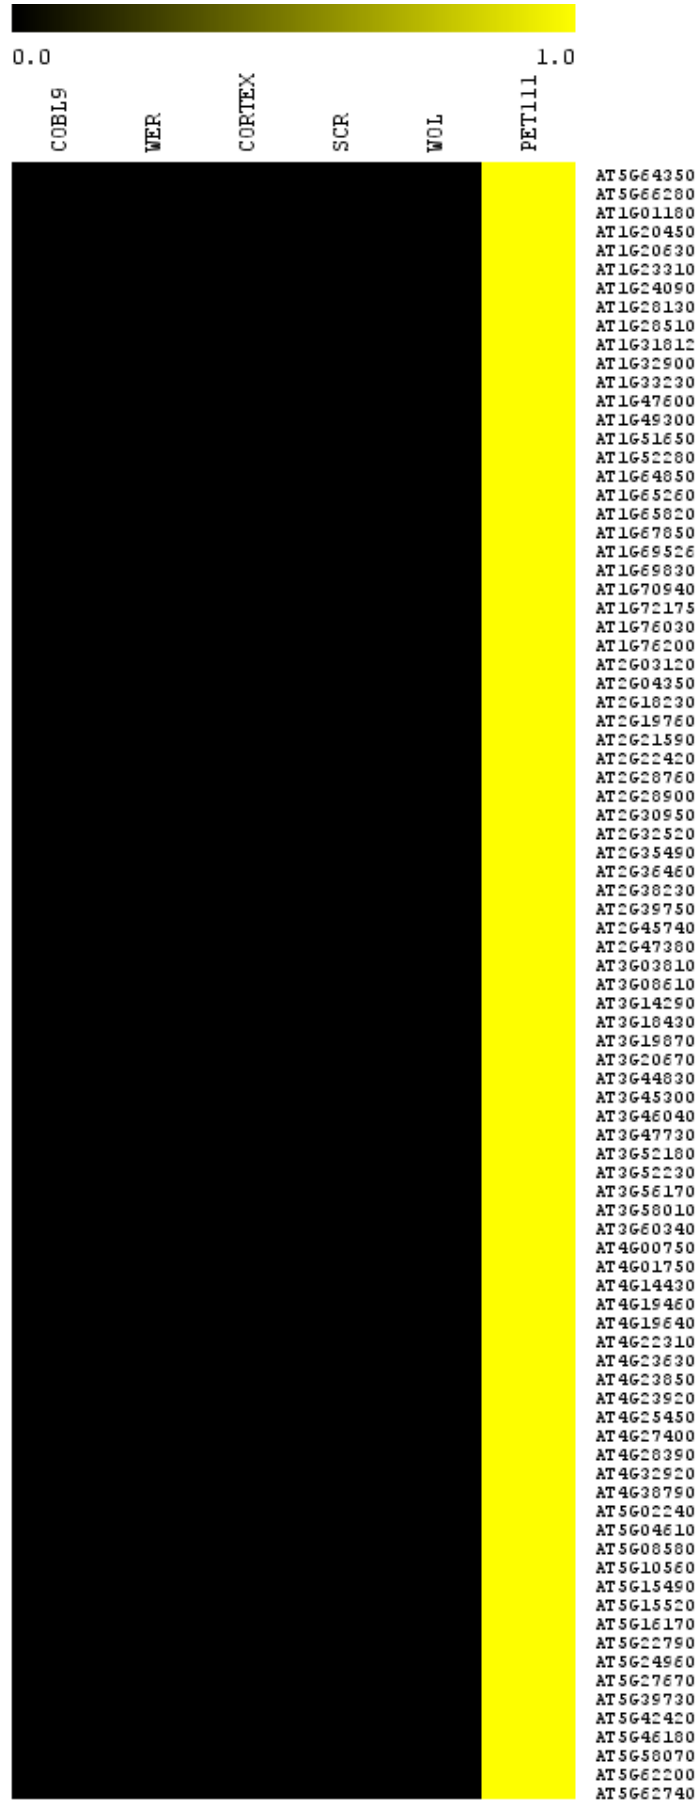

**Cluster 7**

AT1G01180 AT2G03120 AT3G03810 AT4G00750 AT5G02240  
 AT1G20450 AT2G04350 AT3G08610 AT4G01750 AT5G04610  
 AT1G20630 AT2G18230 AT3G14290 AT4G14430 AT5G08580  
 AT1G23310 AT2G19760 AT3G18430 AT4G19460 AT5G10560  
 AT1G24090 AT2G21590 AT3G19870 AT4G19640 AT5G15490  
 AT1G28130 AT2G22420 AT3G20670 AT4G22310 AT5G15520  
 AT1G28510 AT2G28760 AT3G44830 AT4G23630 AT5G16170  
 AT1G31812 AT2G28900 AT3G45300 AT4G23850 AT5G22790  
 AT1G32900 AT2G30950 AT3G46040 AT4G23920 AT5G24960  
 AT1G33230 AT2G32520 AT3G47730 AT4G25450 AT5G27670  
 AT1G47600 AT2G35490 AT3G52180 AT4G27400 AT5G39730  
 AT1G49300 AT2G36460 AT3G52230 AT4G28390 AT5G42420  
 AT1G51650 AT2G38230 AT3G56170 AT4G32920 AT5G46180  
 AT1G52280 AT2G39750 AT3G58010 AT4G38790 AT5G58070  
 AT1G64850 AT2G45740 AT3G60340 AT5G62200  
 AT1G65260 AT2G47380 AT5G62740  
 AT1G65820 AT5G64350  
 AT1G67850 AT5G66280  
 AT1G69526  
 AT1G69830  
 AT1G70940  
 AT1G72175  
 AT1G76030  
 AT1G76200

| Cluster 7<br>GO identifier | Description                                     | #<br>Associated<br>to the GO<br>in Cluster | Total # in<br>Cluster | p-value     |
|----------------------------|-------------------------------------------------|--------------------------------------------|-----------------------|-------------|
| GO:0005773                 | vacuole                                         | 11                                         | 87                    | 2.00E-06    |
| GO:0005739                 | mitochondrion                                   | 13                                         | 87                    | 1.40E-05    |
| GO:0009941                 | chloroplast envelope                            | 8                                          | 87                    | 1.33E-04    |
| GO:0005886                 | plasma membrane                                 | 17                                         | 87                    | 3.17E-04    |
| GO:0015629                 | actin cytoskeleton                              | 2                                          | 87                    | 9.12E-04    |
| GO:0005777                 | peroxisome                                      | 4                                          | 87                    | 0.001102895 |
| GO:0009225                 | nucleotide-sugar metabolic process              | 2                                          | 87                    | 0.002465571 |
| GO:0009535                 | chloroplast thylakoid membrane                  | 5                                          | 87                    | 0.003221857 |
| GO:0003824                 | catalytic activity                              | 6                                          | 87                    | 0.003622847 |
| GO:0004587                 | ornithine-oxo-acid transaminase activity        | 1                                          | 87                    | 0.004171661 |
| GO:0008470                 | isovaleryl-CoA dehydrogenase activity           | 1                                          | 87                    | 0.004171661 |
| GO:0009606                 | tropism                                         | 1                                          | 87                    | 0.004171661 |
| GO:0010170                 | glucose-1-phosphate adenylyltransferase complex | 1                                          | 87                    | 0.004171661 |
| GO:0012506                 | vesicle membrane                                | 1                                          | 87                    | 0.004171661 |
| GO:0016328                 | lateral plasma membrane                         | 1                                          | 87                    | 0.004171661 |
| GO:0031210                 | phosphatidylcholine binding                     | 1                                          | 87                    | 0.004171661 |
| GO:0005783                 | endoplasmic reticulum                           | 5                                          | 87                    | 0.004204992 |
| GO:0015031                 | protein transport                               | 3                                          | 87                    | 0.004662127 |
| GO:0016020                 | membrane                                        | 12                                         | 87                    | 0.005807738 |
| GO:0009409                 | response to cold                                | 4                                          | 87                    | 0.006812963 |
| GO:0006754                 | ATP biosynthetic process                        | 1                                          | 87                    | 0.008308916 |
| GO:0008154                 | actin polymerization or depolymerization        | 1                                          | 87                    | 0.008308916 |
| GO:0008446                 | GDP-mannose 4,6-dehydratase activity            | 1                                          | 87                    | 0.008308916 |

| Cluster 7<br>GO identifier<br>(con.) | Description                                                   | #<br>Associated<br>to the GO<br>in Cluster | Total # in<br>Cluster | p-value     |
|--------------------------------------|---------------------------------------------------------------|--------------------------------------------|-----------------------|-------------|
| GO:0009250                           | glucan biosynthetic process                                   | 1                                          | 87                    | 0.008308916 |
| GO:0047958                           | glycine:2-oxoglutarate aminotransferase activity              | 1                                          | 87                    | 0.008308916 |
| GO:0045271                           | respiratory chain complex I                                   | 2                                          | 87                    | 0.009930159 |
| GO:0005215                           | transporter activity                                          | 4                                          | 87                    | 0.011939347 |
| GO:0004021                           | L-alanine:2-oxoglutarate aminotransferase activity            | 1                                          | 87                    | 0.012411973 |
| GO:0004096                           | catalase activity                                             | 1                                          | 87                    | 0.012411973 |
| GO:0004165                           | dodecenoyl-CoA delta-isomerase activity                       | 1                                          | 87                    | 0.012411973 |
| GO:0004523                           | ribonuclease H activity                                       | 1                                          | 87                    | 0.012411973 |
| GO:0006561                           | proline biosynthetic process                                  | 1                                          | 87                    | 0.012411973 |
| GO:0015865                           | purine nucleotide transport                                   | 1                                          | 87                    | 0.012411973 |
| GO:0048766                           | root hair initiation                                          | 1                                          | 87                    | 0.012411973 |
| GO:0031977                           | thylakoid lumen                                               | 2                                          | 87                    | 0.014285648 |
| GO:0006633                           | fatty acid biosynthetic process                               | 2                                          | 87                    | 0.015471601 |
| GO:0010287                           | plastoglobule                                                 | 2                                          | 87                    | 0.016078331 |
| GO:0003978                           | UDP-glucose 4-epimerase activity                              | 1                                          | 87                    | 0.016481044 |
| GO:0003979                           | UDP-glucose 6-dehydrogenase activity                          | 1                                          | 87                    | 0.016481044 |
| GO:0005471                           | ATP:ADP antiporter activity                                   | 1                                          | 87                    | 0.016481044 |
| GO:0005779                           | integral to peroxisomal membrane                              | 1                                          | 87                    | 0.016481044 |
| GO:0006552                           | leucine catabolic process                                     | 1                                          | 87                    | 0.016481044 |
| GO:0009062                           | fatty acid catabolic process                                  | 1                                          | 87                    | 0.016481044 |
| GO:0010082                           | regulation of root meristem growth                            | 1                                          | 87                    | 0.016481044 |
| GO:0010279                           | indole-3-acetic acid amido synthetase activity                | 1                                          | 87                    | 0.016481044 |
| GO:0006334                           | nucleosome assembly                                           | 2                                          | 87                    | 0.017318579 |
| GO:0003779                           | actin binding                                                 | 2                                          | 87                    | 0.017951816 |
| GO:0016462                           | pyrophosphatase activity                                      | 1                                          | 87                    | 0.020516334 |
| GO:0000062                           | acyl-CoA binding                                              | 1                                          | 87                    | 0.020516334 |
| GO:0004607                           | phosphatidylcholine-sterol O-acyltransferase activity         | 1                                          | 87                    | 0.024518053 |
| GO:0008878                           | glucose-1-phosphate adenyltransferase activity                | 1                                          | 87                    | 0.024518053 |
| GO:0009044                           | xylan 1,4-beta-xylosidase activity                            | 1                                          | 87                    | 0.024518053 |
| GO:0009527                           | plastid outer membrane                                        | 1                                          | 87                    | 0.024518053 |
| GO:0010205                           | photoinhibition                                               | 1                                          | 87                    | 0.024518053 |
| GO:0010304                           | PSII associated light-harvesting complex II catabolic process | 1                                          | 87                    | 0.024518053 |
| GO:0045037                           | protein import into chloroplast stroma                        | 1                                          | 87                    | 0.024518053 |
| GO:0005509                           | calcium ion binding                                           | 3                                          | 87                    | 0.024867218 |
| GO:0007264                           | small GTPase mediated signal transduction                     | 2                                          | 87                    | 0.025452264 |
| GO:0022626                           | cytosolic ribosome                                            | 3                                          | 87                    | 0.027503954 |
| GO:0009507                           | chloroplast                                                   | 15                                         | 87                    | 0.027947013 |
| GO:0004427                           | inorganic diphosphatase activity                              | 1                                          | 87                    | 0.028486405 |
| GO:0004467                           | long-chain-fatty-acid-CoA ligase activity                     | 1                                          | 87                    | 0.028486405 |
| GO:0006995                           | cellular response to nitrogen starvation                      | 1                                          | 87                    | 0.028486405 |
| GO:0008474                           | palmitoyl-(protein) hydrolase activity                        | 1                                          | 87                    | 0.028486405 |
| GO:0009970                           | cellular response to sulfate starvation                       | 1                                          | 87                    | 0.028486405 |
| GO:0030247                           | polysaccharide binding                                        | 1                                          | 87                    | 0.028486405 |
| GO:0009579                           | thylakoid                                                     | 3                                          | 87                    | 0.028670178 |
| GO:0005525                           | GTP binding                                                   | 3                                          | 87                    | 0.030660689 |
| GO:0004129                           | cytochrome-c oxidase activity                                 | 1                                          | 87                    | 0.032421595 |
| GO:0004556                           | alpha-amylase activity                                        | 1                                          | 87                    | 0.032421595 |
| GO:0005982                           | starch metabolic process                                      | 1                                          | 87                    | 0.032421595 |
| GO:0004332                           | fructose-bisphosphate aldolase activity                       | 1                                          | 87                    | 0.036323827 |
| GO:0009415                           | response to water                                             | 1                                          | 87                    | 0.036323827 |
| GO:0009986                           | cell surface                                                  | 1                                          | 87                    | 0.036323827 |
| GO:0016559                           | peroxisome fission                                            | 1                                          | 87                    | 0.036323827 |

| Cluster 7<br>GO identifier<br>(con.) | Description                                                           | #<br>Associated<br>to the GO<br>in Cluster | Total # in<br>Cluster | p-value     |
|--------------------------------------|-----------------------------------------------------------------------|--------------------------------------------|-----------------------|-------------|
| GO:0022627                           | cytosolic small ribosomal subunit                                     | 2                                          | 87                    | 0.039508169 |
| GO:0008138                           | protein tyrosine/serine/threonine phosphatase activity                | 1                                          | 87                    | 0.040193304 |
| GO:0019252                           | starch biosynthetic process                                           | 1                                          | 87                    | 0.040193304 |
| GO:0050826                           | response to freezing                                                  | 1                                          | 87                    | 0.040193304 |
| GO:0009058                           | biosynthetic process                                                  | 2                                          | 87                    | 0.042026177 |
| GO:0006499                           | N-terminal protein myristoylation                                     | 4                                          | 87                    | 0.042216889 |
| GO:0009737                           | response to abscisic acid stimulus                                    | 3                                          | 87                    | 0.043728214 |
| GO:0010197                           | polar nucleus fusion                                                  | 1                                          | 87                    | 0.044030227 |
| GO:0010252                           | auxin homeostasis                                                     | 1                                          | 87                    | 0.044030227 |
| GO:0042626                           | ATPase activity, coupled to transmembrane movement of substances      | 2                                          | 87                    | 0.045448749 |
| GO:0007389                           | pattern specification process                                         | 1                                          | 87                    | 0.047834796 |
| GO:0009534                           | chloroplast thylakoid                                                 | 1                                          | 87                    | 0.047834796 |
| GO:0009672                           | auxin:hydrogen symporter activity                                     | 1                                          | 87                    | 0.047834796 |
| GO:0042546                           | cell wall biogenesis                                                  | 1                                          | 87                    | 0.047834796 |
| GO:0005983                           | starch catabolic process                                              | 1                                          | 87                    | 0.051607211 |
| GO:0048767                           | root hair elongation                                                  | 1                                          | 87                    | 0.051607211 |
| GO:0006098                           | pentose-phosphate shunt                                               | 1                                          | 87                    | 0.05534767  |
| GO:0007031                           | peroxisome organization                                               | 1                                          | 87                    | 0.05534767  |
| GO:0044237                           | cellular metabolic process                                            | 1                                          | 87                    | 0.05534767  |
| GO:0046933                           | hydrogen ion transporting ATP synthase activity, rotational mechanism | 1                                          | 87                    | 0.05905637  |
| GO:0048868                           | pollen tube development                                               | 1                                          | 87                    | 0.05905637  |
| GO:0050662                           | coenzyme binding                                                      | 1                                          | 87                    | 0.05905637  |
| GO:0005730                           | nucleolus                                                             | 3                                          | 87                    | 0.059931641 |
| GO:0009508                           | plastid chromosome                                                    | 1                                          | 87                    | 0.062733508 |
| GO:0010027                           | thylakoid membrane organization                                       | 1                                          | 87                    | 0.062733508 |
| GO:0009416                           | response to light stimulus                                            | 2                                          | 87                    | 0.063467978 |
| GO:0005778                           | peroxisomal membrane                                                  | 1                                          | 87                    | 0.066379277 |
| GO:0009630                           | gravitropism                                                          | 1                                          | 87                    | 0.066379277 |
| GO:0046983                           | protein dimerization activity                                         | 1                                          | 87                    | 0.066379277 |
| GO:0009631                           | cold acclimation                                                      | 1                                          | 87                    | 0.069993874 |
| GO:0009749                           | response to glucose stimulus                                          | 1                                          | 87                    | 0.069993874 |
| GO:0005839                           | proteasome core complex                                               | 1                                          | 87                    | 0.077130316 |
| GO:0007010                           | cytoskeleton organization                                             | 1                                          | 87                    | 0.077130316 |
| GO:0005528                           | FK506 binding                                                         | 1                                          | 87                    | 0.084144366 |
| GO:0005819                           | spindle                                                               | 1                                          | 87                    | 0.084144366 |
| GO:0009707                           | chloroplast outer membrane                                            | 1                                          | 87                    | 0.084144366 |
| GO:0009536                           | plastid                                                               | 2                                          | 87                    | 0.085382806 |
| GO:0009651                           | response to salt stress                                               | 3                                          | 87                    | 0.08730815  |
| GO:0004518                           | nuclease activity                                                     | 1                                          | 87                    | 0.087605967 |
| GO:0009295                           | nucleoid                                                              | 1                                          | 87                    | 0.094439263 |
| GO:0009846                           | pollen germination                                                    | 1                                          | 87                    | 0.094439263 |
| GO:0016036                           | cellular response to phosphate starvation                             | 1                                          | 87                    | 0.094439263 |
| GO:0005618                           | cell wall                                                             | 3                                          | 87                    | 0.095061828 |
| GO:0006810                           | transport                                                             | 3                                          | 87                    | 0.103943616 |
| GO:0005759                           | mitochondrial matrix                                                  | 1                                          | 87                    | 0.107751418 |
| GO:0009853                           | photorespiration                                                      | 1                                          | 87                    | 0.107751418 |
| GO:0009706                           | chloroplast inner membrane                                            | 1                                          | 87                    | 0.11423321  |
| GO:0042542                           | response to hydrogen peroxide                                         | 1                                          | 87                    | 0.117431168 |
| GO:0008152                           | metabolic process                                                     | 4                                          | 87                    | 0.120231474 |
| GO:0009570                           | chloroplast stroma                                                    | 3                                          | 87                    | 0.123164952 |

| Cluster 7<br>GO identifier<br>(con.) | Description                                                           | #<br>Associated<br>to the GO<br>in Cluster | Total # in<br>Cluster | p-value     |
|--------------------------------------|-----------------------------------------------------------------------|--------------------------------------------|-----------------------|-------------|
| GO:0005829                           | cytosol                                                               | 2                                          | 87                    | 0.125986488 |
| GO:0009926                           | auxin polar transport                                                 | 1                                          | 87                    | 0.129940908 |
| GO:0000786                           | nucleosome                                                            | 1                                          | 87                    | 0.132998702 |
| GO:0009524                           | phragmoplast                                                          | 1                                          | 87                    | 0.132998702 |
| GO:0009744                           | response to sucrose stimulus                                          | 1                                          | 87                    | 0.132998702 |
| GO:0042538                           | hyperosmotic salinity response                                        | 1                                          | 87                    | 0.132998702 |
| GO:0006470                           | protein amino acid dephosphorylation                                  | 1                                          | 87                    | 0.142007735 |
| GO:0006979                           | response to oxidative stress                                          | 2                                          | 87                    | 0.144659838 |
| GO:0005198                           | structural molecule activity                                          | 1                                          | 87                    | 0.144956536 |
| GO:0006839                           | mitochondrial transport                                               | 1                                          | 87                    | 0.147878516 |
| GO:0015450                           | P-P-bond-hydrolysis-driven protein transmembrane transporter activity | 1                                          | 87                    | 0.150773846 |
| GO:0004364                           | glutathione transferase activity                                      | 1                                          | 87                    | 0.153642693 |
| GO:0005737                           | cytoplasm                                                             | 3                                          | 87                    | 0.158911764 |
| GO:0008168                           | methyltransferase activity                                            | 1                                          | 87                    | 0.159301608 |
| GO:0008233                           | peptidase activity                                                    | 1                                          | 87                    | 0.159301608 |
| GO:0006464                           | protein modification process                                          | 1                                          | 87                    | 0.162092008 |
| GO:0005488                           | binding                                                               | 3                                          | 87                    | 0.16764531  |
| GO:0009555                           | pollen development                                                    | 1                                          | 87                    | 0.178297928 |
| GO:0003755                           | peptidyl-prolyl cis-trans isomerase activity                          | 1                                          | 87                    | 0.180911009 |
| GO:0048046                           | apoplast                                                              | 2                                          | 87                    | 0.186388441 |
| GO:0004601                           | peroxidase activity                                                   | 1                                          | 87                    | 0.210386628 |
| GO:0046686                           | response to cadmium ion                                               | 2                                          | 87                    | 0.212942056 |
| GO:0048364                           | root development                                                      | 1                                          | 87                    | 0.214972243 |
| GO:0003735                           | structural constituent of ribosome                                    | 2                                          | 87                    | 0.216797404 |
| GO:0009543                           | chloroplast thylakoid lumen                                           | 1                                          | 87                    | 0.217231137 |
| GO:0006412                           | translation                                                           | 2                                          | 87                    | 0.224118866 |
| GO:0016757                           | transferase activity, transferring glycosyl groups                    | 2                                          | 87                    | 0.224705427 |
| GO:0005743                           | mitochondrial inner membrane                                          | 1                                          | 87                    | 0.230318849 |
| GO:0009826                           | unidimensional cell growth                                            | 1                                          | 87                    | 0.238610963 |
| GO:0006869                           | lipid transport                                                       | 1                                          | 87                    | 0.246567079 |
| GO:0006950                           | response to stress                                                    | 1                                          | 87                    | 0.250421867 |
| GO:0009408                           | response to heat                                                      | 1                                          | 87                    | 0.266784344 |
| GO:0009611                           | response to wounding                                                  | 1                                          | 87                    | 0.287722431 |
| GO:0009753                           | response to jasmonic acid stimulus                                    | 1                                          | 87                    | 0.296376515 |
| GO:0016887                           | ATPase activity                                                       | 1                                          | 87                    | 0.297759612 |
| GO:0005794                           | Golgi apparatus                                                       | 1                                          | 87                    | 0.315427882 |
| GO:0009414                           | response to water deprivation                                         | 1                                          | 87                    | 0.324176005 |
| GO:0006629                           | lipid metabolic process                                               | 1                                          | 87                    | 0.333831073 |
| GO:0016787                           | hydrolase activity                                                    | 1                                          | 87                    | 0.33646357  |
| GO:0004553                           | hydrolase activity, hydrolyzing O-glycosyl compounds                  | 1                                          | 87                    | 0.344405025 |
| GO:0005840                           | ribosome                                                              | 1                                          | 87                    | 0.359131327 |
| GO:0006511                           | ubiquitin-dependent protein catabolic process                         | 1                                          | 87                    | 0.361679637 |
| GO:0006457                           | protein folding                                                       | 1                                          | 87                    | 0.36629976  |
| GO:0031225                           | anchored to membrane                                                  | 1                                          | 87                    | 0.366562434 |
| GO:0009733                           | response to auxin stimulus                                            | 1                                          | 87                    | 0.369762843 |

### Cluster 7

| GO Identifier | #Loci | Associated Loci (Left to Right) |
|---------------|-------|---------------------------------|
| GO:0000062    | 1     | AT1G31812                       |
| GO:0000786    | 1     | AT3G20670                       |
| GO:0003735    | 2     | AT3G46040 AT5G15520             |
| GO:0003755    | 1     | AT5G64350                       |

**Cluster 7 (con.)**

| <b>GO Identifier</b> | <b>#Loci</b> | <b>Associated Loci (Left to Right)</b> |           |           |           |           |           |
|----------------------|--------------|----------------------------------------|-----------|-----------|-----------|-----------|-----------|
| GO:0003779           | 2            | AT1G20450                              | AT2G19760 |           |           |           |           |
| GO:0003824           | 6            | AT2G28760                              | AT2G36460 | AT4G14430 | AT4G23850 | AT5G02240 | AT5G04610 |
| GO:0003978           | 1            | AT4G23920                              |           |           |           |           |           |
| GO:0003979           | 1            | AT5G15490                              |           |           |           |           |           |
| GO:0004021           | 1            | AT1G23310                              |           |           |           |           |           |
| GO:0004096           | 1            | AT1G20630                              |           |           |           |           |           |
| GO:0004129           | 1            | AT2G47380                              |           |           |           |           |           |
| GO:0004165           | 1            | AT4G14430                              |           |           |           |           |           |
| GO:0004332           | 1            | AT2G36460                              |           |           |           |           |           |
| GO:0004364           | 1            | AT1G65820                              |           |           |           |           |           |
| GO:0004427           | 1            | AT2G18230                              |           |           |           |           |           |
| GO:0004467           | 1            | AT2G04350                              |           |           |           |           |           |
| GO:0004518           | 1            | AT3G56170                              |           |           |           |           |           |
| GO:0004523           | 1            | AT1G24090                              |           |           |           |           |           |
| GO:0004553           | 1            | AT5G10560                              |           |           |           |           |           |
| GO:0004556           | 1            | AT1G69830                              |           |           |           |           |           |
| GO:0004587           | 1            | AT5G46180                              |           |           |           |           |           |
| GO:0004601           | 1            | AT2G22420                              |           |           |           |           |           |
| GO:0004607           | 1            | AT3G44830                              |           |           |           |           |           |
| GO:0005198           | 1            | AT2G35490                              |           |           |           |           |           |
| GO:0005215           | 4            | AT1G70940                              | AT3G47730 | AT4G25450 | AT5G58070 |           |           |
| GO:0005471           | 1            | AT4G28390                              |           |           |           |           |           |
| GO:0005488           | 3            | AT3G19870                              | AT4G28390 | AT5G02240 |           |           |           |
| GO:0005509           | 3            | AT1G64850                              | AT3G18430 | AT5G08580 |           |           |           |
| GO:0005525           | 3            | AT1G49300                              | AT1G52280 | AT4G19640 |           |           |           |
| GO:0005528           | 1            | AT5G64350                              |           |           |           |           |           |
| GO:0005618           | 3            | AT1G20630                              | AT2G19760 | AT5G15490 |           |           |           |
| GO:0005730           | 3            | AT2G19760                              | AT5G15520 | AT5G27670 |           |           |           |
| GO:0005737           | 3            | AT1G20450                              | AT1G28130 | AT2G19760 |           |           |           |
| GO:0005739           | 13           | AT1G20630                              | AT1G51650 | AT2G36460 | AT2G45740 | AT2G47380 | AT3G08610 |
|                      |              | AT3G45300                              | AT3G47730 | AT4G22310 | AT4G28390 | AT5G22790 | AT5G46180 |
|                      |              | AT5G58070                              |           |           |           |           |           |
| GO:0005743           | 1            | AT4G28390                              |           |           |           |           |           |
| GO:0005759           | 1            | AT3G45300                              |           |           |           |           |           |
| GO:0005773           | 11           | AT1G23310                              | AT1G52280 | AT1G65820 | AT2G28900 | AT3G18430 | AT3G60340 |
|                      |              | AT4G23630                              | AT4G32920 | AT5G10560 | AT5G58070 | AT5G62740 |           |
| GO:0005777           | 4            | AT1G20630                              | AT1G23310 | AT2G45740 | AT4G14430 |           |           |
| GO:0005778           | 1            | AT2G45740                              |           |           |           |           |           |
| GO:0005779           | 1            | AT2G45740                              |           |           |           |           |           |
| GO:0005783           | 5            | AT1G65820                              | AT2G03120 | AT2G04350 | AT4G23630 | AT5G58070 |           |
| GO:0005794           | 1            | AT4G00750                              |           |           |           |           |           |
| GO:0005819           | 1            | AT2G19760                              |           |           |           |           |           |
| GO:0005829           | 2            | AT1G31812                              | AT4G23920 |           |           |           |           |
| GO:0005839           | 1            | AT3G14290                              |           |           |           |           |           |
| GO:0005840           | 1            | AT5G15520                              |           |           |           |           |           |
| GO:0005886           | 17           | AT1G31812                              | AT1G49300 | AT1G52280 | AT1G70940 | AT2G19760 | AT2G28760 |
|                      |              | AT2G36460                              | AT4G19640 | AT4G23630 | AT4G23850 | AT5G02240 | AT5G08580 |
|                      |              | AT5G10560                              | AT5G39730 | AT5G58070 | AT5G62200 | AT5G62740 |           |
| GO:0005982           | 1            | AT3G52180                              |           |           |           |           |           |
| GO:0005983           | 1            | AT1G69830                              |           |           |           |           |           |
| GO:0006098           | 1            | AT2G36460                              |           |           |           |           |           |
| GO:0006334           | 2            | AT3G20670                              | AT5G27670 |           |           |           |           |
| GO:0006412           | 2            | AT3G46040                              | AT5G15520 |           |           |           |           |
| GO:0006457           | 1            | AT5G64350                              |           |           |           |           |           |
| GO:0006464           | 1            | AT3G60340                              |           |           |           |           |           |
| GO:0006470           | 1            | AT3G52180                              |           |           |           |           |           |
| GO:0006499           | 4            | AT3G03810                              | AT3G18430 | AT3G56170 | AT5G62740 |           |           |
| GO:0006511           | 1            | AT3G14290                              |           |           |           |           |           |
| GO:0006552           | 1            | AT3G45300                              |           |           |           |           |           |

**Cluster 7 (con.)**

| <b>GO Identifier</b> | <b>#Loci</b> | <b>Associated Loci (Left to Right)</b> |           |           |           |           |           |
|----------------------|--------------|----------------------------------------|-----------|-----------|-----------|-----------|-----------|
| GO:0006629           | 1            | AT3G44830                              |           |           |           |           |           |
| GO:0006633           | 2            | AT2G04350                              | AT4G23850 |           |           |           |           |
| GO:0006754           | 1            | AT1G51650                              |           |           |           |           |           |
| GO:0006810           | 3            | AT4G25450                              | AT4G28390 | AT5G58070 |           |           |           |
| GO:0006839           | 1            | AT4G28390                              |           |           |           |           |           |
| GO:0006869           | 1            | AT1G31812                              |           |           |           |           |           |
| GO:0006950           | 1            | AT1G20450                              |           |           |           |           |           |
| GO:0006979           | 2            | AT1G49300                              | AT2G22420 |           |           |           |           |
| GO:0006995           | 1            | AT1G20630                              |           |           |           |           |           |
| GO:0007010           | 1            | AT2G19760                              |           |           |           |           |           |
| GO:0007031           | 1            | AT2G45740                              |           |           |           |           |           |
| GO:0007264           | 2            | AT1G52280                              | AT4G19640 |           |           |           |           |
| GO:0007389           | 1            | AT1G70940                              |           |           |           |           |           |
| GO:0008138           | 1            | AT3G52180                              |           |           |           |           |           |
| GO:0008152           | 4            | AT1G69526                              | AT2G18230 | AT4G14430 | AT5G02240 |           |           |
| GO:0008154           | 1            | AT2G19760                              |           |           |           |           |           |
| GO:0008168           | 1            | AT1G69526                              |           |           |           |           |           |
| GO:0008233           | 1            | AT3G14290                              |           |           |           |           |           |
| GO:0008446           | 1            | AT5G66280                              |           |           |           |           |           |
| GO:0008470           | 1            | AT3G45300                              |           |           |           |           |           |
| GO:0008474           | 1            | AT3G60340                              |           |           |           |           |           |
| GO:0008878           | 1            | AT2G21590                              |           |           |           |           |           |
| GO:0009044           | 1            | AT5G10560                              |           |           |           |           |           |
| GO:0009058           | 2            | AT1G32900                              | AT4G19460 |           |           |           |           |
| GO:0009062           | 1            | AT4G14430                              |           |           |           |           |           |
| GO:0009225           | 2            | AT2G28760                              | AT5G66280 |           |           |           |           |
| GO:0009250           | 1            | AT1G32900                              |           |           |           |           |           |
| GO:0009295           | 1            | AT1G65260                              |           |           |           |           |           |
| GO:0009408           | 1            | AT5G58070                              |           |           |           |           |           |
| GO:0009409           | 4            | AT1G20450                              | AT1G31812 | AT2G28900 | AT5G58070 |           |           |
| GO:0009414           | 1            | AT1G20450                              |           |           |           |           |           |
| GO:0009415           | 1            | AT1G20450                              |           |           |           |           |           |
| GO:0009416           | 2            | AT1G20630                              | AT5G58070 |           |           |           |           |
| GO:0009507           | 15           | AT1G23310                              | AT1G32900 | AT1G65260 | AT1G69526 | AT1G69830 | AT2G28900 |
|                      |              | AT2G30950                              | AT2G32520 | AT2G35490 | AT2G45740 | AT3G03810 | AT3G52180 |
|                      |              | AT3G52230                              | AT3G58010 | AT4G25450 |           |           |           |
| GO:0009508           | 1            | AT1G65260                              |           |           |           |           |           |
| GO:0009524           | 1            | AT2G19760                              |           |           |           |           |           |
| GO:0009527           | 1            | AT2G28900                              |           |           |           |           |           |
| GO:0009534           | 1            | AT1G65260                              |           |           |           |           |           |
| GO:0009535           | 5            | AT1G65260                              | AT2G30950 | AT2G35490 | AT3G52230 | AT3G58010 |           |
| GO:0009536           | 2            | AT4G28390                              | AT5G22790 |           |           |           |           |
| GO:0009543           | 1            | AT5G64350                              |           |           |           |           |           |
| GO:0009555           | 1            | AT2G03120                              |           |           |           |           |           |
| GO:0009570           | 3            | AT1G65260                              | AT1G69830 | AT3G52180 |           |           |           |
| GO:0009579           | 3            | AT2G30950                              | AT2G35490 | AT3G58010 |           |           |           |
| GO:0009606           | 1            | AT1G70940                              |           |           |           |           |           |
| GO:0009611           | 1            | AT2G28900                              |           |           |           |           |           |
| GO:0009630           | 1            | AT1G70940                              |           |           |           |           |           |
| GO:0009631           | 1            | AT1G20450                              |           |           |           |           |           |
| GO:0009651           | 3            | AT1G49300                              | AT2G36460 | AT5G39730 |           |           |           |
| GO:0009672           | 1            | AT1G70940                              |           |           |           |           |           |
| GO:0009706           | 1            | AT5G22790                              |           |           |           |           |           |
| GO:0009707           | 1            | AT3G52230                              |           |           |           |           |           |
| GO:0009733           | 1            | AT1G28130                              |           |           |           |           |           |
| GO:0009737           | 3            | AT1G20450                              | AT1G20630 | AT5G02240 |           |           |           |
| GO:0009744           | 1            | AT2G28900                              |           |           |           |           |           |
| GO:0009749           | 1            | AT2G28900                              |           |           |           |           |           |
| GO:0009753           | 1            | AT2G28900                              |           |           |           |           |           |



**Cluster 7 (con.)**

| <b>GO Identifier</b> | <b>#Loci</b> | <b>Associated Loci (Left to Right)</b> |           |           |           |           |           |  |
|----------------------|--------------|----------------------------------------|-----------|-----------|-----------|-----------|-----------|--|
| GO:0009826           | 1            | AT2G19760                              |           |           |           |           |           |  |
| GO:0009846           | 1            | AT2G03120                              |           |           |           |           |           |  |
| GO:0009853           | 1            | AT1G23310                              |           |           |           |           |           |  |
| GO:0009926           | 1            | AT1G70940                              |           |           |           |           |           |  |
| GO:0009941           | 8            | AT1G20630                              | AT1G65260 | AT2G28900 | AT2G30950 | AT3G52230 | AT4G25450 |  |
|                      |              | AT4G28390                              | AT5G22790 |           |           |           |           |  |
| GO:0009970           | 1            | AT1G20630                              |           |           |           |           |           |  |
| GO:0009986           | 1            | AT1G70940                              |           |           |           |           |           |  |
| GO:0010027           | 1            | AT2G30950                              |           |           |           |           |           |  |
| GO:0010082           | 1            | AT1G70940                              |           |           |           |           |           |  |
| GO:0010170           | 1            | AT2G21590                              |           |           |           |           |           |  |
| GO:0010197           | 1            | AT3G03810                              |           |           |           |           |           |  |
| GO:0010205           | 1            | AT2G30950                              |           |           |           |           |           |  |
| GO:0010252           | 1            | AT1G28130                              |           |           |           |           |           |  |
| GO:0010279           | 1            | AT1G28130                              |           |           |           |           |           |  |
| GO:0010287           | 2            | AT2G35490                              | AT3G58010 |           |           |           |           |  |
| GO:0010304           | 1            | AT2G30950                              |           |           |           |           |           |  |
| GO:0012506           | 1            | AT1G70940                              |           |           |           |           |           |  |
| GO:0015031           | 3            | AT1G52280                              | AT2G28900 | AT4G19640 |           |           |           |  |
| GO:0015450           | 1            | AT2G28900                              |           |           |           |           |           |  |
| GO:0015629           | 2            | AT1G20450                              | AT2G19760 |           |           |           |           |  |
| GO:0015865           | 1            | AT4G28390                              |           |           |           |           |           |  |
| GO:0016020           | 12           | AT1G20450                              | AT1G23310 | AT1G65260 | AT1G65820 | AT2G18230 | AT2G30950 |  |
|                      |              | AT2G36460                              | AT4G25450 | AT4G28390 | AT5G15520 | AT5G42420 | AT5G62740 |  |
| GO:0016036           | 1            | AT1G20630                              |           |           |           |           |           |  |
| GO:0016328           | 1            | AT1G70940                              |           |           |           |           |           |  |
| GO:0016462           | 1            | AT2G18230                              |           |           |           |           |           |  |
| GO:0016559           | 1            | AT2G45740                              |           |           |           |           |           |  |
| GO:0016757           | 2            | AT1G32900                              | AT4G19460 |           |           |           |           |  |
| GO:0016787           | 1            | AT2G32520                              |           |           |           |           |           |  |
| GO:0016887           | 1            | AT2G30950                              |           |           |           |           |           |  |
| GO:0019252           | 1            | AT2G21590                              |           |           |           |           |           |  |
| GO:0022626           | 3            | AT1G20630                              | AT3G14290 | AT3G46040 |           |           |           |  |
| GO:0022627           | 2            | AT3G46040                              | AT5G15520 |           |           |           |           |  |
| GO:0030247           | 1            | AT3G52180                              |           |           |           |           |           |  |
| GO:0031210           | 1            | AT1G31812                              |           |           |           |           |           |  |
| GO:0031225           | 1            | AT5G62200                              |           |           |           |           |           |  |
| GO:0031977           | 2            | AT2G30950                              | AT3G58010 |           |           |           |           |  |
| GO:0042538           | 1            | AT5G46180                              |           |           |           |           |           |  |
| GO:0042542           | 1            | AT1G20630                              |           |           |           |           |           |  |
| GO:0042546           | 1            | AT4G23920                              |           |           |           |           |           |  |
| GO:0042626           | 2            | AT3G47730                              | AT4G25450 |           |           |           |           |  |
| GO:0044237           | 1            | AT5G02240                              |           |           |           |           |           |  |
| GO:0045037           | 1            | AT2G28900                              |           |           |           |           |           |  |
| GO:0045271           | 2            | AT1G76200                              | AT3G08610 |           |           |           |           |  |
| GO:0046686           | 2            | AT1G20630                              | AT2G36460 |           |           |           |           |  |
| GO:0046933           | 1            | AT1G51650                              |           |           |           |           |           |  |
| GO:0046983           | 1            | AT4G23920                              |           |           |           |           |           |  |
| GO:0047958           | 1            | AT1G23310                              |           |           |           |           |           |  |
| GO:0048046           | 2            | AT1G23310                              | AT5G02240 |           |           |           |           |  |
| GO:0048364           | 1            | AT1G70940                              |           |           |           |           |           |  |
| GO:0048766           | 1            | AT1G70940                              |           |           |           |           |           |  |
| GO:0048767           | 1            | AT1G70940                              |           |           |           |           |           |  |
| GO:0048868           | 1            | AT3G03810                              |           |           |           |           |           |  |
| GO:0050662           | 1            | AT5G02240                              |           |           |           |           |           |  |
| GO:0050826           | 1            | AT1G31812                              |           |           |           |           |           |  |

### Cluster 8

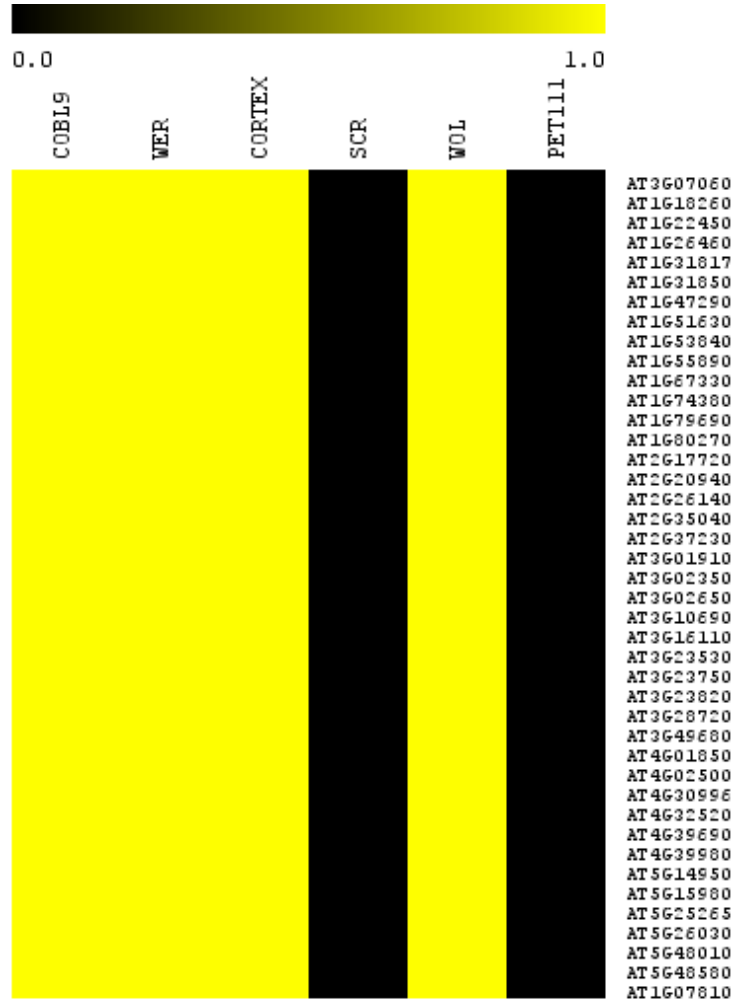

### Cluster 8

AT1G07810  
 AT1G18260  
 AT1G22450  
 AT1G26460  
 AT1G31817  
 AT1G31850  
 AT1G47290  
 AT1G51630  
 AT1G53840  
 AT1G55890  
 AT1G67330  
 AT1G74380  
 AT1G79690  
 AT1G80270  
 AT2G17720  
 AT2G20940  
 AT2G26140  
 AT2G35040  
 AT2G37230  
 AT3G01910  
 AT3G02350  
 AT3G02650

**Cluster 8 (con.)**

AT3G07060  
 AT3G10690  
 AT3G16110  
 AT3G23530  
 AT3G23750  
 AT3G23820  
 AT3G28720  
 AT3G49680  
 AT4G01850  
 AT4G02500  
 AT4G30996  
 AT4G32520  
 AT4G39690  
 AT4G39980  
 AT5G14950  
 AT5G15980  
 AT5G25265  
 AT5G26030  
 AT5G48010  
 AT5G48580

| Cluster 8<br>GO identifier | Description                                                              | #<br>Associated<br>to the GO<br>in Cluster | Total # in<br>Cluster | p-value     |
|----------------------------|--------------------------------------------------------------------------|--------------------------------------------|-----------------------|-------------|
| GO:0005739                 | mitochondrion                                                            | 11                                         | 42                    | 2.17E-07    |
| GO:0033843                 | xyloglucan 6-xylosyltransferase activity                                 | 2                                          | 42                    | 1.19E-05    |
| GO:0005794                 | Golgi apparatus                                                          | 4                                          | 42                    | 1.21E-04    |
| GO:0048767                 | root hair elongation                                                     | 2                                          | 42                    | 3.02E-04    |
| GO:0003937                 | IMP cyclohydrolase activity                                              | 1                                          | 42                    | 0.002013906 |
| GO:0004643                 | phosphoribosylaminoimidazolecarboxamide<br>formyltransferase activity    | 1                                          | 42                    | 0.002013906 |
| GO:0008482                 | sulfite oxidase activity                                                 | 1                                          | 42                    | 0.002013906 |
| GO:0010477                 | response to sulfur dioxide                                               | 1                                          | 42                    | 0.002013906 |
| GO:0051746                 | thalianol synthase activity                                              | 1                                          | 42                    | 0.002013906 |
| GO:0009536                 | plastid                                                                  | 3                                          | 42                    | 0.002140663 |
| GO:0009423                 | chorismate biosynthetic process                                          | 1                                          | 42                    | 0.004019892 |
| GO:0010263                 | tricyclic triterpenoid biosynthetic process                              | 1                                          | 42                    | 0.004019892 |
| GO:0033014                 | tetrapyrrole biosynthetic process                                        | 1                                          | 42                    | 0.004019892 |
| GO:0047012                 | sterol-4-alpha-carboxylate 3-dehydrogenase<br>(decarboxylating) activity | 1                                          | 42                    | 0.004019892 |
| GO:0003824                 | catalytic activity                                                       | 4                                          | 42                    | 0.00556488  |
| GO:0003849                 | 3-deoxy-7-phosphoheptulonate synthase activity                           | 1                                          | 42                    | 0.006017983 |
| GO:0004325                 | ferrochelataase activity                                                 | 1                                          | 42                    | 0.006017983 |
| GO:0035252                 | UDP-xylosyltransferase activity                                          | 1                                          | 42                    | 0.006017983 |
| GO:0003854                 | 3-beta-hydroxy-delta5-steroid dehydrogenase activity                     | 1                                          | 42                    | 0.0080082   |
| GO:0004084                 | branched-chain-amino-acid transaminase activity                          | 1                                          | 42                    | 0.0080082   |
| GO:0004478                 | methionine adenosyltransferase activity                                  | 1                                          | 42                    | 0.0080082   |
| GO:0006268                 | DNA unwinding during replication                                         | 1                                          | 42                    | 0.0080082   |
| GO:0006556                 | S-adenosylmethionine biosynthetic process                                | 1                                          | 42                    | 0.0080082   |
| GO:0015994                 | chlorophyll metabolic process                                            | 1                                          | 42                    | 0.0080082   |
| GO:0004372                 | glycine hydroxymethyltransferase activity                                | 1                                          | 42                    | 0.009990566 |
| GO:0006544                 | glycine metabolic process                                                | 1                                          | 42                    | 0.009990566 |
| GO:0006563                 | L-serine metabolic process                                               | 1                                          | 42                    | 0.009990566 |

| Cluster 8<br>GO identifier<br>(con.) | Description                                                                                                                                                                                       | #<br>Associated<br>to the GO<br>in Cluster | Total # in<br>Cluster | p-value     |
|--------------------------------------|---------------------------------------------------------------------------------------------------------------------------------------------------------------------------------------------------|--------------------------------------------|-----------------------|-------------|
| GO:0006694                           | steroid biosynthetic process                                                                                                                                                                      | 1                                          | 42                    | 0.009990566 |
| GO:0009969                           | xyloglucan biosynthetic process                                                                                                                                                                   | 1                                          | 42                    | 0.009990566 |
| GO:0050378                           | UDP-glucuronate 4-epimerase activity                                                                                                                                                              | 1                                          | 42                    | 0.009990566 |
| GO:0016740                           | transferase activity                                                                                                                                                                              | 2                                          | 42                    | 0.010768598 |
| GO:0006164                           | purine nucleotide biosynthetic process                                                                                                                                                            | 1                                          | 42                    | 0.011965105 |
| GO:0009081                           | branched chain family amino acid metabolic process                                                                                                                                                | 1                                          | 42                    | 0.011965105 |
| GO:0004559                           | alpha-mannosidase activity                                                                                                                                                                        | 1                                          | 42                    | 0.013931838 |
| GO:0006783                           | heme biosynthetic process                                                                                                                                                                         | 1                                          | 42                    | 0.013931838 |
| GO:0004129                           | cytochrome-c oxidase activity                                                                                                                                                                     | 1                                          | 42                    | 0.015890788 |
| GO:0016757                           | transferase activity, transferring glycosyl groups                                                                                                                                                | 3                                          | 42                    | 0.018858869 |
| GO:0018401                           | peptidyl-proline hydroxylation to 4-hydroxy-L-proline                                                                                                                                             | 1                                          | 42                    | 0.019785428 |
| GO:0019745                           | pentacyclic triterpenoid biosynthetic process                                                                                                                                                     | 1                                          | 42                    | 0.019785428 |
| GO:0055114                           | oxidation reduction                                                                                                                                                                               | 1                                          | 42                    | 0.019785428 |
| GO:0000139                           | Golgi membrane                                                                                                                                                                                    | 1                                          | 42                    | 0.013931838 |
| GO:0006487                           | protein amino acid N-linked glycosylation                                                                                                                                                         | 1                                          | 42                    | 0.023649205 |
| GO:0006259                           | DNA metabolic process                                                                                                                                                                             | 1                                          | 42                    | 0.025569576 |
| GO:0006790                           | sulfur metabolic process                                                                                                                                                                          | 1                                          | 42                    | 0.025569576 |
| GO:0009073                           | aromatic amino acid family biosynthetic process                                                                                                                                                   | 1                                          | 42                    | 0.025569576 |
| GO:0006265                           | DNA topological change                                                                                                                                                                            | 1                                          | 42                    | 0.027482297 |
| GO:0003756                           | protein disulfide isomerase activity                                                                                                                                                              | 1                                          | 42                    | 0.029387391 |
| GO:0000271                           | polysaccharide biosynthetic process                                                                                                                                                               | 1                                          | 42                    | 0.033174786 |
| GO:0009225                           | nucleotide-sugar metabolic process                                                                                                                                                                | 1                                          | 42                    | 0.035057131 |
| GO:0008299                           | isoprenoid biosynthetic process                                                                                                                                                                   | 1                                          | 42                    | 0.036931937 |
| GO:0005528                           | FK506 binding                                                                                                                                                                                     | 1                                          | 42                    | 0.042511338 |
| GO:0030163                           | protein catabolic process                                                                                                                                                                         | 1                                          | 42                    | 0.042511338 |
| GO:0047262                           | polygalacturonate 4-alpha-galacturonosyltransferase activity                                                                                                                                      | 1                                          | 42                    | 0.046193641 |
| GO:0009295                           | nucleoid                                                                                                                                                                                          | 1                                          | 42                    | 0.048023669 |
| GO:0010319                           | stromule                                                                                                                                                                                          | 1                                          | 42                    | 0.058849446 |
| GO:0016706                           | oxidoreductase activity, acting on paired donors, with incorporation or reduction of molecular oxygen, 2-oxoglutarate as one donor, and incorporation of one atom each of oxygen into both donors | 1                                          | 42                    | 0.078021199 |
| GO:0005783                           | endoplasmic reticulum                                                                                                                                                                             | 2                                          | 42                    | 0.083321631 |
| GO:0045454                           | cell redox homeostasis                                                                                                                                                                            | 1                                          | 42                    | 0.084780394 |
| GO:0016051                           | carbohydrate biosynthetic process                                                                                                                                                                 | 1                                          | 42                    | 0.086452772 |
| GO:0009507                           | chloroplast                                                                                                                                                                                       | 7                                          | 42                    | 0.09367506  |
| GO:0003755                           | peptidyl-prolyl cis-trans isomerase activity                                                                                                                                                      | 1                                          | 42                    | 0.097966575 |
| GO:0009617                           | response to bacterium                                                                                                                                                                             | 1                                          | 42                    | 0.097966575 |
| GO:0016758                           | transferase activity, transferring hexosyl groups                                                                                                                                                 | 1                                          | 42                    | 0.104396143 |
| GO:0042545                           | cell wall modification                                                                                                                                                                            | 1                                          | 42                    | 0.107570604 |
| GO:0030599                           | pectinesterase activity                                                                                                                                                                           | 1                                          | 42                    | 0.120003308 |
| GO:0048364                           | root development                                                                                                                                                                                  | 1                                          | 42                    | 0.120003308 |
| GO:0009543                           | chloroplast thylakoid lumen                                                                                                                                                                       | 1                                          | 42                    | 0.121527888 |
| GO:0005576                           | extracellular region                                                                                                                                                                              | 1                                          | 42                    | 0.13495924  |
| GO:0022627                           | cytosolic small ribosomal subunit                                                                                                                                                                 | 1                                          | 42                    | 0.137873962 |
| GO:0016020                           | membrane                                                                                                                                                                                          | 4                                          | 42                    | 0.152269755 |
| GO:0005773                           | vacuole                                                                                                                                                                                           | 2                                          | 42                    | 0.164724739 |
| GO:0005507                           | copper ion binding                                                                                                                                                                                | 1                                          | 42                    | 0.173531489 |
| GO:0009611                           | response to wounding                                                                                                                                                                              | 1                                          | 42                    | 0.174822445 |
| GO:0005777                           | peroxisome                                                                                                                                                                                        | 1                                          | 42                    | 0.179928484 |
| GO:0016887                           | ATPase activity                                                                                                                                                                                   | 1                                          | 42                    | 0.18369782  |
| GO:0016787                           | hydrolase activity                                                                                                                                                                                | 1                                          | 42                    | 0.224018356 |

| Cluster 8<br>GO identifier<br>(con.) | Description                                   | #<br>Associated<br>to the GO<br>in Cluster | Total # in<br>Cluster | p-value     |
|--------------------------------------|-----------------------------------------------|--------------------------------------------|-----------------------|-------------|
| GO:0004672                           | protein kinase activity                       | 1                                          | 42                    | 0.233348882 |
| GO:0009579                           | thylakoid                                     | 1                                          | 42                    | 0.245166266 |
| GO:0005829                           | cytosol                                       | 1                                          | 42                    | 0.247068197 |
| GO:0009409                           | response to cold                              | 1                                          | 42                    | 0.261609258 |
| GO:0006979                           | response to oxidative stress                  | 1                                          | 42                    | 0.265061428 |
| GO:0006457                           | protein folding                               | 1                                          | 42                    | 0.274992972 |
| GO:0005730                           | nucleolus                                     | 1                                          | 42                    | 0.299846969 |
| GO:0009505                           | plant-type cell wall                          | 1                                          | 42                    | 0.299846969 |
| GO:0009535                           | chloroplast thylakoid membrane                | 1                                          | 42                    | 0.306286109 |
| GO:0016021                           | integral to membrane                          | 1                                          | 42                    | 0.308144483 |
| GO:0009793                           | embryonic development ending in seed dormancy | 1                                          | 42                    | 0.323926992 |
| GO:0003735                           | structural constituent of ribosome            | 1                                          | 42                    | 0.326459742 |
| GO:0009651                           | response to salt stress                       | 1                                          | 42                    | 0.328909517 |
| GO:0006412                           | translation                                   | 1                                          | 42                    | 0.332202398 |
| GO:0005618                           | cell wall                                     | 1                                          | 42                    | 0.335339001 |
| GO:0006508                           | proteolysis                                   | 1                                          | 42                    | 0.348466385 |
| GO:0006499                           | N-terminal protein myristoylation             | 1                                          | 42                    | 0.351699381 |
| GO:0009570                           | chloroplast stroma                            | 1                                          | 42                    | 0.353802311 |
| GO:0009941                           | chloroplast envelope                          | 1                                          | 42                    | 0.3581322   |
| GO:0005488                           | binding                                       | 1                                          | 42                    | 0.370353424 |

### Cluster 8

| <b>GO Identifier</b> | <b>#Loci</b> | <b>Associated Loci (Left to Right)</b> |           |           |           |           |           |
|----------------------|--------------|----------------------------------------|-----------|-----------|-----------|-----------|-----------|
| GO:0000139           | 1            | AT1G74380                              |           |           |           |           |           |
| GO:0000271           | 1            | AT4G02500                              |           |           |           |           |           |
| GO:0003735           | 1            | AT1G31817                              |           |           |           |           |           |
| GO:0003755           | 1            | AT5G48580                              |           |           |           |           |           |
| GO:0003756           | 1            | AT3G16110                              |           |           |           |           |           |
| GO:0003824           | 4            | AT3G10690                              | AT3G23820 | AT3G49680 | AT5G48010 |           |           |
| GO:0003849           | 1            | AT4G39980                              |           |           |           |           |           |
| GO:0003854           | 1            | AT1G47290                              |           |           |           |           |           |
| GO:0003937           | 1            | AT2G35040                              |           |           |           |           |           |
| GO:0004084           | 1            | AT3G49680                              |           |           |           |           |           |
| GO:0004129           | 1            | AT1G22450                              |           |           |           |           |           |
| GO:0004325           | 1            | AT5G26030                              |           |           |           |           |           |
| GO:0004372           | 1            | AT4G32520                              |           |           |           |           |           |
| GO:0004478           | 1            | AT4G01850                              |           |           |           |           |           |
| GO:0004559           | 1            | AT5G14950                              |           |           |           |           |           |
| GO:0004643           | 1            | AT2G35040                              |           |           |           |           |           |
| GO:0004672           | 1            | AT3G23750                              |           |           |           |           |           |
| GO:0005488           | 1            | AT1G18260                              |           |           |           |           |           |
| GO:0005507           | 1            | AT4G01850                              |           |           |           |           |           |
| GO:0005528           | 1            | AT5G48580                              |           |           |           |           |           |
| GO:0005576           | 1            | AT1G53840                              |           |           |           |           |           |
| GO:0005618           | 1            | AT4G01850                              |           |           |           |           |           |
| GO:0005730           | 1            | AT4G01850                              |           |           |           |           |           |
| GO:0005739           | 11           | AT1G22450                              | AT1G26460 | AT1G55890 | AT2G20940 | AT2G26140 | AT3G01910 |
|                      |              | AT3G10690                              | AT4G02500 | AT4G39690 | AT5G15980 | AT5G26030 |           |
| GO:0005773           | 2            | AT1G79690                              | AT5G48580 |           |           |           |           |
| GO:0005777           | 1            | AT3G01910                              |           |           |           |           |           |
| GO:0005783           | 2            | AT1G18260                              | AT3G16110 |           |           |           |           |
| GO:0005794           | 4            | AT1G31850                              | AT1G74380 | AT3G02350 | AT5G14950 |           |           |
| GO:0005829           | 1            | AT1G79690                              |           |           |           |           |           |
| GO:0006164           | 1            | AT2G35040                              |           |           |           |           |           |

**Cluster 8 (con.)**

| <u>GO Identifier</u> | <u>#Loci</u> | <u>Associated Loci (Left to Right)</u> |           |           |           |           |           |
|----------------------|--------------|----------------------------------------|-----------|-----------|-----------|-----------|-----------|
| GO:0006259           | 1            | AT3G10690                              |           |           |           |           |           |
| GO:0006265           | 1            | AT3G10690                              |           |           |           |           |           |
| GO:0006268           | 1            | AT3G10690                              |           |           |           |           |           |
| GO:0006412           | 1            | AT1G31817                              |           |           |           |           |           |
| GO:0006457           | 1            | AT5G48580                              |           |           |           |           |           |
| GO:0006487           | 1            | AT5G14950                              |           |           |           |           |           |
| GO:0006499           | 1            | AT1G74380                              |           |           |           |           |           |
| GO:0006508           | 1            | AT2G26140                              |           |           |           |           |           |
| GO:0006544           | 1            | AT4G32520                              |           |           |           |           |           |
| GO:0006556           | 1            | AT4G01850                              |           |           |           |           |           |
| GO:0006563           | 1            | AT4G32520                              |           |           |           |           |           |
| GO:0006694           | 1            | AT1G47290                              |           |           |           |           |           |
| GO:0006783           | 1            | AT5G26030                              |           |           |           |           |           |
| GO:0006790           | 1            | AT3G01910                              |           |           |           |           |           |
| GO:0006979           | 1            | AT5G26030                              |           |           |           |           |           |
| GO:0008299           | 1            | AT1G79690                              |           |           |           |           |           |
| GO:0008482           | 1            | AT3G01910                              |           |           |           |           |           |
| GO:0009073           | 1            | AT4G39980                              |           |           |           |           |           |
| GO:0009081           | 1            | AT3G49680                              |           |           |           |           |           |
| GO:0009225           | 1            | AT3G23820                              |           |           |           |           |           |
| GO:0009295           | 1            | AT3G10690                              |           |           |           |           |           |
| GO:0009409           | 1            | AT2G35040                              |           |           |           |           |           |
| GO:0009423           | 1            | AT4G39980                              |           |           |           |           |           |
| GO:0009505           | 1            | AT1G53840                              |           |           |           |           |           |
| GO:0009507           | 7            | AT1G22450                              | AT2G35040 | AT3G10690 | AT3G49680 | AT4G32520 | AT4G39980 |
|                      |              | AT5G26030                              |           |           |           |           |           |
| GO:0009535           | 1            | AT1G22450                              |           |           |           |           |           |
| GO:0009536           | 3            | AT2G20940                              | AT2G26140 | AT5G26030 |           |           |           |
| GO:0009543           | 1            | AT5G48580                              |           |           |           |           |           |
| GO:0009570           | 1            | AT2G35040                              |           |           |           |           |           |
| GO:0009579           | 1            | AT1G22450                              |           |           |           |           |           |
| GO:0009611           | 1            | AT4G39980                              |           |           |           |           |           |
| GO:0009617           | 1            | AT4G39980                              |           |           |           |           |           |
| GO:0009651           | 1            | AT1G22450                              |           |           |           |           |           |
| GO:0009793           | 1            | AT3G07060                              |           |           |           |           |           |
| GO:0009941           | 1            | AT1G80270                              |           |           |           |           |           |
| GO:0009969           | 1            | AT4G02500                              |           |           |           |           |           |
| GO:0010263           | 1            | AT5G48010                              |           |           |           |           |           |
| GO:0010319           | 1            | AT2G35040                              |           |           |           |           |           |
| GO:0010477           | 1            | AT3G01910                              |           |           |           |           |           |
| GO:0015994           | 1            | AT3G01910                              |           |           |           |           |           |
| GO:0016020           | 4            | AT1G18260                              | AT1G47290 | AT1G53840 | AT2G26140 |           |           |
| GO:0016021           | 1            | AT4G02500                              |           |           |           |           |           |
| GO:0016051           | 1            | AT3G02350                              |           |           |           |           |           |
| GO:0016706           | 1            | AT2G17720                              |           |           |           |           |           |
| GO:0016740           | 2            | AT1G74380                              | AT4G02500 |           |           |           |           |
| GO:0016757           | 3            | AT1G74380                              | AT3G02350 | AT4G02500 |           |           |           |
| GO:0016758           | 1            | AT3G02350                              |           |           |           |           |           |
| GO:0016787           | 1            | AT1G79690                              |           |           |           |           |           |
| GO:0016887           | 1            | AT2G26140                              |           |           |           |           |           |
| GO:0018401           | 1            | AT2G17720                              |           |           |           |           |           |
| GO:0019745           | 1            | AT5G48010                              |           |           |           |           |           |
| GO:0022627           | 1            | AT1G31817                              |           |           |           |           |           |
| GO:0030163           | 1            | AT2G26140                              |           |           |           |           |           |
| GO:0030599           | 1            | AT1G53840                              |           |           |           |           |           |
| GO:0033014           | 1            | AT5G26030                              |           |           |           |           |           |
| GO:0033843           | 2            | AT1G74380                              | AT4G02500 |           |           |           |           |
| GO:0035252           | 1            | AT4G02500                              |           |           |           |           |           |
| GO:0042545           | 1            | AT1G53840                              |           |           |           |           |           |

**Cluster 8 (con.)**

| <u>GO Identifier</u> | <u>#Loci</u> | <u>Associated Loci (Left to Right)</u> |
|----------------------|--------------|----------------------------------------|
| GO:0045454           | 1            | AT3G16110                              |
| GO:0047012           | 1            | AT1G47290                              |
| GO:0047262           | 1            | AT3G02350                              |
| GO:0048364           | 1            | AT5G48010                              |
| GO:0048767           | 2            | AT1G74380 AT4G02500                    |
| GO:0050378           | 1            | AT3G23820                              |
| GO:0051746           | 1            | AT5G48010                              |
| GO:0055114           | 1            | AT1G22450                              |

**Cluster 9**

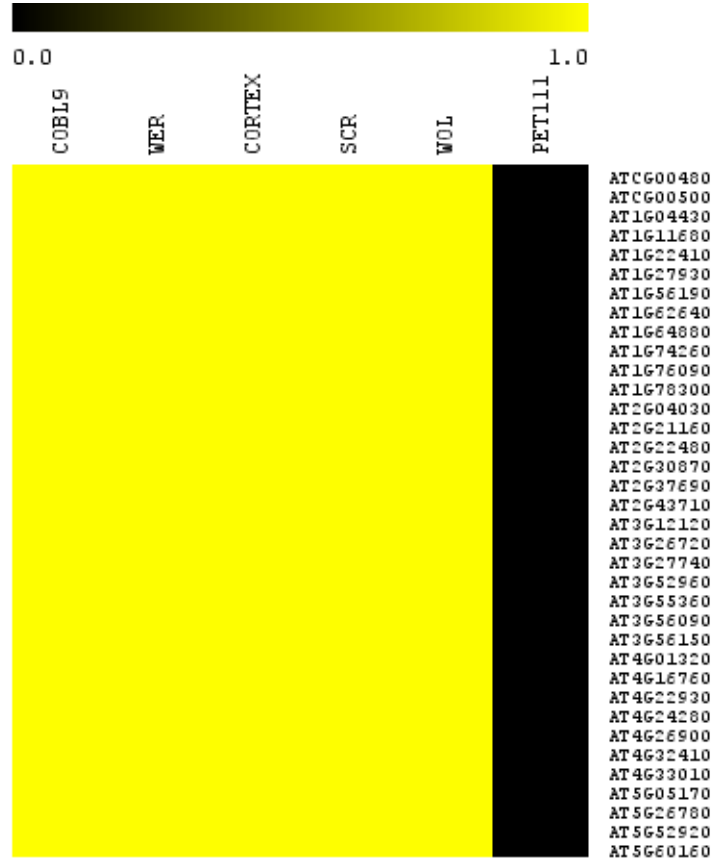

**Cluster 9**

- AT1G04430
- AT1G11680
- AT1G22410
- AT1G27930
- AT1G56190
- AT1G62640
- AT1G64880
- AT1G74260
- AT1G76090
- AT1G78300
- AT2G04030
- AT2G21160
- AT2G22480
- AT2G30870
- AT2G37690
- AT2G43710
- AT3G12120

**Cluster 9 (con.)**

AT3G26720  
 AT3G27740  
 AT3G52960  
 AT3G55360  
 AT3G56090  
 AT3G56150  
 AT4G01320  
 AT4G16760  
 AT4G22930  
 AT4G24280  
 AT4G26900  
 AT4G32410  
 AT4G33010  
 AT5G05170  
 AT5G26780  
 AT5G52920  
 AT5G60160  
 ATCG00480  
 ATCG00500

| Cluster 9<br>GO identifier | Description                                                   | #<br>Associated<br>to the GO<br>in Cluster | Total # in<br>Cluster | p-value     |
|----------------------------|---------------------------------------------------------------|--------------------------------------------|-----------------------|-------------|
| GO:0009570                 | chloroplast stroma                                            | 8                                          | 34                    | 7.49E-08    |
| GO:0009507                 | chloroplast                                                   | 15                                         | 34                    | 1.05E-06    |
| GO:0005783                 | endoplasmic reticulum                                         | 6                                          | 34                    | 3.77E-06    |
| GO:0046686                 | response to cadmium ion                                       | 6                                          | 34                    | 4.95E-06    |
| GO:0006207                 | 'de novo' pyrimidine base biosynthetic process                | 2                                          | 34                    | 1.54E-05    |
| GO:0009833                 | primary cell wall biogenesis                                  | 2                                          | 34                    | 1.54E-05    |
| GO:0005886                 | plasma membrane                                               | 11                                         | 34                    | 3.55E-05    |
| GO:0006096                 | glycolysis                                                    | 3                                          | 34                    | 4.60E-05    |
| GO:0005794                 | Golgi apparatus                                               | 4                                          | 34                    | 5.25E-05    |
| GO:0005773                 | vacuole                                                       | 6                                          | 34                    | 6.60E-05    |
| GO:0005739                 | mitochondrion                                                 | 7                                          | 34                    | 1.78E-04    |
| GO:0030244                 | cellulose biosynthetic process                                | 2                                          | 34                    | 5.26E-04    |
| GO:0016126                 | sterol biosynthetic process                                   | 2                                          | 34                    | 5.78E-04    |
| GO:0016759                 | cellulose synthase activity                                   | 2                                          | 34                    | 0.001459095 |
| GO:0000107                 | imidazoleglycerol-phosphate synthase activity                 | 1                                          | 34                    | 0.001630304 |
| GO:0004088                 | carbamoyl-phosphate synthase (glutamine-hydrolyzing) activity | 1                                          | 34                    | 0.001630304 |
| GO:0004151                 | dihydroorotase activity                                       | 1                                          | 34                    | 0.001630304 |
| GO:0004642                 | phosphoribosylformylglycinamide synthase activity             | 1                                          | 34                    | 0.001630304 |
| GO:0004768                 | stearoyl-CoA 9-desaturase activity                            | 1                                          | 34                    | 0.001630304 |
| GO:0008398                 | sterol 14-demethylase activity                                | 1                                          | 34                    | 0.001630304 |
| GO:0010157                 | response to chlorate                                          | 1                                          | 34                    | 0.001630304 |
| GO:0016720                 | delta12-fatty acid dehydrogenase activity                     | 1                                          | 34                    | 0.001630304 |
| GO:0019166                 | trans-2-enoyl-CoA reductase (NADPH) activity                  | 1                                          | 34                    | 0.001630304 |
| GO:0019856                 | pyrimidine base biosynthetic process                          | 1                                          | 34                    | 0.001630304 |
| GO:0009579                 | thylakoid                                                     | 3                                          | 34                    | 0.002481602 |
| GO:0006633                 | fatty acid biosynthetic process                               | 2                                          | 34                    | 0.0026024   |
| GO:0009941                 | chloroplast envelope                                          | 4                                          | 34                    | 0.002657234 |
| GO:0003838                 | sterol 24-C-methyltransferase activity                        | 1                                          | 34                    | 0.003255449 |
| GO:0003865                 | 3-oxo-5-alpha-steroid 4-dehydrogenase activity                | 1                                          | 34                    | 0.003255449 |
| GO:0004315                 | 3-oxoacyl-[acyl-carrier-protein] synthase activity            | 1                                          | 34                    | 0.003255449 |
| GO:0009923                 | fatty acid elongase complex                                   | 1                                          | 34                    | 0.003255449 |



| Cluster 9<br>GO identifier<br>(con.) | Description | #<br>Associated<br>to the GO<br>in Cluster | Total # in<br>Cluster | p-value |
|--------------------------------------|-------------|--------------------------------------------|-----------------------|---------|
|--------------------------------------|-------------|--------------------------------------------|-----------------------|---------|

|            |                                                           |   |    |             |
|------------|-----------------------------------------------------------|---|----|-------------|
| GO:0045485 | omega-6 fatty acid desaturase activity                    | 1 | 34 | 0.003255449 |
| GO:0003849 | 3-deoxy-7-phosphoheptulonate synthase activity            | 1 | 34 | 0.004875446 |
| GO:0004618 | phosphoglycerate kinase activity                          | 1 | 34 | 0.004875446 |
| GO:0006013 | mannose metabolic process                                 | 1 | 34 | 0.004875446 |
| GO:0055072 | iron ion homeostasis                                      | 1 | 34 | 0.004875446 |
| GO:0001676 | long-chain fatty acid metabolic process                   | 1 | 34 | 0.006490307 |
| GO:0005960 | glycine cleavage complex                                  | 1 | 34 | 0.006490307 |
| GO:0006665 | sphingolipid metabolic process                            | 1 | 34 | 0.006490307 |
| GO:0008199 | ferric iron binding                                       | 1 | 34 | 0.006490307 |
| GO:0003997 | acyl-CoA oxidase activity                                 | 1 | 34 | 0.008100044 |
| GO:0004372 | glycine hydroxymethyltransferase activity                 | 1 | 34 | 0.008100044 |
| GO:0004375 | glycine dehydrogenase (decarboxylating) activity          | 1 | 34 | 0.008100044 |
| GO:0006544 | glycine metabolic process                                 | 1 | 34 | 0.008100044 |
| GO:0006563 | L-serine metabolic process                                | 1 | 34 | 0.008100044 |
| GO:0006636 | unsaturated fatty acid biosynthetic process               | 1 | 34 | 0.008100044 |
| GO:0009704 | de-etiolation                                             | 1 | 34 | 0.008100044 |
| GO:0019464 | glycine decarboxylation via glycine cleavage system       | 1 | 34 | 0.008100044 |
| GO:0045300 | acyl-[acyl-carrier-protein] desaturase activity           | 1 | 34 | 0.008100044 |
| GO:0006541 | glutamine metabolic process                               | 1 | 34 | 0.009704669 |
| GO:0006546 | glycine catabolic process                                 | 1 | 34 | 0.009704669 |
| GO:0008610 | lipid biosynthetic process                                | 1 | 34 | 0.009704669 |
| GO:0009922 | fatty acid elongase activity                              | 1 | 34 | 0.009704669 |
| GO:0000105 | histidine biosynthetic process                            | 1 | 34 | 0.011304193 |
| GO:0003872 | 6-phosphofructokinase activity                            | 1 | 34 | 0.011304193 |
| GO:0004559 | alpha-mannosidase activity                                | 1 | 34 | 0.011304193 |
| GO:0005945 | 6-phosphofructokinase complex                             | 1 | 34 | 0.011304193 |
| GO:0043295 | glutathione binding                                       | 1 | 34 | 0.011304193 |
| GO:0055046 | microgametogenesis                                        | 1 | 34 | 0.011304193 |
| GO:0006526 | arginine biosynthetic process                             | 1 | 34 | 0.012898628 |
| GO:0000302 | response to reactive oxygen species                       | 1 | 34 | 0.014487986 |
| GO:0005852 | eukaryotic translation initiation factor 3 complex        | 1 | 34 | 0.014487986 |
| GO:0006826 | iron ion transport                                        | 1 | 34 | 0.014487986 |
| GO:0006879 | cellular iron ion homeostasis                             | 1 | 34 | 0.014487986 |
| GO:0010039 | response to iron ion                                      | 1 | 34 | 0.014487986 |
| GO:0004743 | pyruvate kinase activity                                  | 1 | 34 | 0.016072279 |
| GO:0010025 | wax biosynthetic process                                  | 1 | 34 | 0.016072279 |
| GO:0016209 | antioxidant activity                                      | 1 | 34 | 0.017651518 |
| GO:0042742 | defense response to bacterium                             | 2 | 34 | 0.018758721 |
| GO:0045309 | protein phosphorylated amino acid binding                 | 1 | 34 | 0.019225716 |
| GO:0009414 | response to water deprivation                             | 2 | 34 | 0.019265355 |
| GO:0006631 | fatty acid metabolic process                              | 1 | 34 | 0.020794883 |
| GO:0009073 | aromatic amino acid family biosynthetic process           | 1 | 34 | 0.020794883 |
| GO:0009863 | salicylic acid mediated signaling pathway                 | 1 | 34 | 0.020794883 |
| GO:0051607 | defense response to virus                                 | 1 | 34 | 0.020794883 |
| GO:0018119 | peptidyl-cysteine S-nitrosylation                         | 1 | 34 | 0.022359031 |
| GO:0009532 | plastid stroma                                            | 1 | 34 | 0.025472318 |
| GO:0006807 | nitrogen compound metabolic process                       | 1 | 34 | 0.028565668 |
| GO:0009695 | jasmonic acid biosynthetic process                        | 1 | 34 | 0.028565668 |
| GO:0008757 | S-adenosylmethionine-dependent methyltransferase activity | 1 | 34 | 0.031639175 |
| GO:0009742 | brassinosteroid mediated signaling                        | 1 | 34 | 0.033168516 |
| GO:0005789 | endoplasmic reticulum membrane                            | 1 | 34 | 0.03469293  |
| GO:0009867 | jasmonic acid mediated signaling pathway                  | 1 | 34 | 0.036212429 |

| Cluster 9<br>GO identifier<br>(con.) | Description | #<br>Associated<br>to the GO<br>in Cluster | Total # in<br>Cluster | p-value |
|--------------------------------------|-------------|--------------------------------------------|-----------------------|---------|
|--------------------------------------|-------------|--------------------------------------------|-----------------------|---------|

|            |                                                    |   |    |             |
|------------|----------------------------------------------------|---|----|-------------|
| GO:0006635 | fatty acid beta-oxidation                          | 1 | 34 | 0.037727024 |
| GO:0009832 | plant-type cell wall biogenesis                    | 1 | 34 | 0.037727024 |
| GO:0006457 | protein folding                                    | 2 | 34 | 0.039111975 |
| GO:0048316 | seed development                                   | 1 | 34 | 0.039236727 |
| GO:0009505 | plant-type cell wall                               | 2 | 34 | 0.050534959 |
| GO:0048046 | apoplast                                           | 2 | 34 | 0.051578773 |
| GO:0042538 | hyperosmotic salinity response                     | 1 | 34 | 0.05697566  |
| GO:0005524 | ATP binding                                        | 3 | 34 | 0.062657235 |
| GO:0009407 | toxin catabolic process                            | 1 | 34 | 0.062735794 |
| GO:0015979 | photosynthesis                                     | 1 | 34 | 0.062735794 |
| GO:0009793 | embryonic development ending in seed dormancy      | 2 | 34 | 0.065197381 |
| GO:0004364 | glutathione transferase activity                   | 1 | 34 | 0.067006479 |
| GO:0016757 | transferase activity, transferring glycosyl groups | 2 | 34 | 0.071855045 |
| GO:0006413 | translational initiation                           | 1 | 34 | 0.082308314 |
| GO:0006952 | defense response                                   | 2 | 34 | 0.082770791 |
| GO:0006508 | proteolysis                                        | 2 | 34 | 0.086954303 |
| GO:0003743 | translation initiation factor activity             | 1 | 34 | 0.10228972  |
| GO:0009908 | flower development                                 | 1 | 34 | 0.104878453 |
| GO:0048366 | leaf development                                   | 1 | 34 | 0.108728784 |
| GO:0009058 | biosynthetic process                               | 1 | 34 | 0.118806045 |
| GO:0009408 | response to heat                                   | 1 | 34 | 0.13221811  |
| GO:0005507 | copper ion binding                                 | 1 | 34 | 0.146277098 |
| GO:0009611 | response to wounding                               | 1 | 34 | 0.147422231 |
| GO:0005777 | peroxisome                                         | 1 | 34 | 0.15196262  |
| GO:0006629 | lipid metabolic process                            | 1 | 34 | 0.189036885 |
| GO:0016020 | membrane                                           | 3 | 34 | 0.202080402 |
| GO:0005840 | ribosome                                           | 1 | 34 | 0.224217231 |
| GO:0009409 | response to cold                                   | 1 | 34 | 0.227631989 |
| GO:0019825 | oxygen binding                                     | 1 | 34 | 0.230993851 |
| GO:0009535 | chloroplast thylakoid membrane                     | 1 | 34 | 0.272788922 |
| GO:0003735 | structural constituent of ribosome                 | 1 | 34 | 0.29485927  |
| GO:0009651 | response to salt stress                            | 1 | 34 | 0.297651226 |
| GO:0006412 | translation                                        | 1 | 34 | 0.30145248  |
| GO:0005975 | carbohydrate metabolic process                     | 1 | 34 | 0.302515796 |
| GO:0005618 | cell wall                                          | 1 | 34 | 0.305130367 |
| GO:0003824 | catalytic activity                                 | 1 | 34 | 0.334510642 |
| GO:0005622 | intracellular                                      | 1 | 34 | 0.34107388  |
| GO:0005737 | cytoplasm                                          | 1 | 34 | 0.351329878 |

### Cluster 9

#### GO Identifier   #Loci   Associated Loci (Left to Right)

|            |   |           |
|------------|---|-----------|
| GO:0000105 | 1 | AT4G26900 |
| GO:0000107 | 1 | AT4G26900 |
| GO:0000302 | 1 | AT3G56090 |
| GO:0001676 | 1 | AT4G16760 |
| GO:0003735 | 1 | AT1G64880 |
| GO:0003743 | 1 | AT3G56150 |
| GO:0003824 | 1 | AT1G74260 |
| GO:0003838 | 1 | AT1G76090 |
| GO:0003849 | 1 | AT1G22410 |
| GO:0003865 | 1 | AT3G55360 |
| GO:0003872 | 1 | AT2G22480 |
| GO:0003997 | 1 | AT4G16760 |
| GO:0004088 | 1 | AT3G27740 |

**Cluster 9 (con.)**

| <b>GO Identifier</b> | <b>#Loci</b> | <b>Associated Loci (Left to Right)</b> |           |           |           |           |           |  |
|----------------------|--------------|----------------------------------------|-----------|-----------|-----------|-----------|-----------|--|
| GO:0004151           | 1            | AT4G22930                              |           |           |           |           |           |  |
| GO:0004315           | 1            | AT1G62640                              |           |           |           |           |           |  |
| GO:0004364           | 1            | AT2G30870                              |           |           |           |           |           |  |
| GO:0004372           | 1            | AT5G26780                              |           |           |           |           |           |  |
| GO:0004375           | 1            | AT4G33010                              |           |           |           |           |           |  |
| GO:0004559           | 1            | AT3G26720                              |           |           |           |           |           |  |
| GO:0004618           | 1            | AT1G56190                              |           |           |           |           |           |  |
| GO:0004642           | 1            | AT1G74260                              |           |           |           |           |           |  |
| GO:0004743           | 1            | AT5G52920                              |           |           |           |           |           |  |
| GO:0004768           | 1            | AT2G43710                              |           |           |           |           |           |  |
| GO:0005507           | 1            | AT2G30870                              |           |           |           |           |           |  |
| GO:0005524           | 3            | AT1G74260                              | AT2G04030 | AT4G24280 |           |           |           |  |
| GO:0005618           | 1            | AT2G30870                              |           |           |           |           |           |  |
| GO:0005622           | 1            | AT1G64880                              |           |           |           |           |           |  |
| GO:0005737           | 1            | AT2G30870                              |           |           |           |           |           |  |
| GO:0005739           | 7            | AT1G56190                              | AT1G74260 | AT2G04030 | AT4G24280 | AT4G33010 | AT5G26780 |  |
|                      |              | AT5G52920                              |           |           |           |           |           |  |
| GO:0005773           | 6            | AT1G78300                              | AT2G21160 | AT2G30870 | AT3G26720 | AT4G01320 | AT5G60160 |  |
| GO:0005777           | 1            | AT4G16760                              |           |           |           |           |           |  |
| GO:0005783           | 6            | AT1G11680                              | AT1G76090 | AT2G21160 | AT3G12120 | AT3G55360 | AT4G01320 |  |
| GO:0005789           | 1            | AT3G55360                              |           |           |           |           |           |  |
| GO:0005794           | 4            | AT1G04430                              | AT1G64880 | AT4G32410 | AT5G05170 |           |           |  |
| GO:0005840           | 1            | AT1G64880                              |           |           |           |           |           |  |
| GO:0005852           | 1            | AT3G56150                              |           |           |           |           |           |  |
| GO:0005886           | 11           | AT1G04430                              | AT1G11680 | AT1G78300 | AT2G04030 | AT2G21160 | AT2G30870 |  |
|                      |              | AT3G26720                              | AT3G55360 | AT4G32410 | AT5G05170 | AT5G60160 |           |  |
| GO:0005945           | 1            | AT2G22480                              |           |           |           |           |           |  |
| GO:0005960           | 1            | AT4G33010                              |           |           |           |           |           |  |
| GO:0005975           | 1            | AT3G26720                              |           |           |           |           |           |  |
| GO:0006013           | 1            | AT3G26720                              |           |           |           |           |           |  |
| GO:0006096           | 3            | AT1G56190                              | AT2G22480 | AT5G52920 |           |           |           |  |
| GO:0006207           | 2            | AT3G27740                              | AT4G22930 |           |           |           |           |  |
| GO:0006412           | 1            | AT1G64880                              |           |           |           |           |           |  |
| GO:0006413           | 1            | AT3G56150                              |           |           |           |           |           |  |
| GO:0006457           | 2            | AT2G04030                              | AT4G24280 |           |           |           |           |  |
| GO:0006508           | 2            | AT4G01320                              | AT5G60160 |           |           |           |           |  |
| GO:0006526           | 1            | AT3G27740                              |           |           |           |           |           |  |
| GO:0006541           | 1            | AT3G27740                              |           |           |           |           |           |  |
| GO:0006544           | 1            | AT5G26780                              |           |           |           |           |           |  |
| GO:0006546           | 1            | AT4G33010                              |           |           |           |           |           |  |
| GO:0006563           | 1            | AT5G26780                              |           |           |           |           |           |  |
| GO:0006629           | 1            | AT3G12120                              |           |           |           |           |           |  |
| GO:0006631           | 1            | AT2G43710                              |           |           |           |           |           |  |
| GO:0006633           | 2            | AT1G62640                              | AT5G52920 |           |           |           |           |  |
| GO:0006635           | 1            | AT4G16760                              |           |           |           |           |           |  |
| GO:0006636           | 1            | AT2G43710                              |           |           |           |           |           |  |
| GO:0006665           | 1            | AT3G55360                              |           |           |           |           |           |  |
| GO:0006807           | 1            | AT3G27740                              |           |           |           |           |           |  |
| GO:0006826           | 1            | AT3G56090                              |           |           |           |           |           |  |
| GO:0006879           | 1            | AT3G56090                              |           |           |           |           |           |  |
| GO:0006952           | 2            | AT2G43710                              | AT5G05170 |           |           |           |           |  |
| GO:0008199           | 1            | AT3G56090                              |           |           |           |           |           |  |
| GO:0008398           | 1            | AT1G11680                              |           |           |           |           |           |  |
| GO:0008610           | 1            | AT2G43710                              |           |           |           |           |           |  |
| GO:0008757           | 1            | AT1G76090                              |           |           |           |           |           |  |
| GO:0009058           | 1            | AT3G27740                              |           |           |           |           |           |  |
| GO:0009073           | 1            | AT1G22410                              |           |           |           |           |           |  |
| GO:0009407           | 1            | AT2G30870                              |           |           |           |           |           |  |
| GO:0009408           | 1            | AT2G04030                              |           |           |           |           |           |  |

**Cluster 9 (con.)**

| <b>GO Identifier</b> | <b>#Loci</b> | <b>Associated Loci (Left to Right)</b> |           |           |           |           |           |
|----------------------|--------------|----------------------------------------|-----------|-----------|-----------|-----------|-----------|
| GO:0009409           | 1            | AT4G24280                              |           |           |           |           |           |
| GO:0009414           | 2            | AT2G04030                              | AT2G30870 |           |           |           |           |
| GO:0009505           | 2            | AT3G26720                              | AT3G52960 |           |           |           |           |
| GO:0009507           | 15           | AT1G56190                              | AT1G62640 | AT1G74260 | AT2G04030 | AT2G22480 | AT2G30870 |
|                      |              | AT2G43710                              | AT3G27740 | AT3G52960 | AT3G56090 | AT4G22930 | AT4G24280 |
|                      |              | AT4G26900                              | AT4G33010 | AT5G52920 |           |           |           |
| GO:0009532           | 1            | AT4G24280                              |           |           |           |           |           |
| GO:0009535           | 1            | AT2G21160                              |           |           |           |           |           |
| GO:0009570           | 8            | AT1G56190                              | AT1G74260 | AT2G04030 | AT2G43710 | AT3G27740 | AT3G52960 |
|                      |              | AT4G24280                              | AT5G52920 |           |           |           |           |
| GO:0009579           | 3            | AT1G56190                              | AT3G52960 | AT4G24280 |           |           |           |
| GO:0009611           | 1            | AT4G16760                              |           |           |           |           |           |
| GO:0009651           | 1            | AT2G04030                              |           |           |           |           |           |
| GO:0009695           | 1            | AT2G43710                              |           |           |           |           |           |
| GO:0009704           | 1            | AT2G04030                              |           |           |           |           |           |
| GO:0009742           | 1            | AT1G78300                              |           |           |           |           |           |
| GO:0009793           | 2            | AT1G11680                              | AT2G04030 |           |           |           |           |
| GO:0009832           | 1            | AT4G32410                              |           |           |           |           |           |
| GO:0009833           | 2            | AT4G32410                              | AT5G05170 |           |           |           |           |
| GO:0009863           | 1            | AT2G43710                              |           |           |           |           |           |
| GO:0009867           | 1            | AT2G43710                              |           |           |           |           |           |
| GO:0009908           | 1            | AT3G56090                              |           |           |           |           |           |
| GO:0009922           | 1            | AT3G55360                              |           |           |           |           |           |
| GO:0009923           | 1            | AT3G55360                              |           |           |           |           |           |
| GO:0009941           | 4            | AT2G04030                              | AT3G56090 | AT4G24280 | AT4G33010 |           |           |
| GO:0010025           | 1            | AT3G55360                              |           |           |           |           |           |
| GO:0010039           | 1            | AT3G56090                              |           |           |           |           |           |
| GO:0010157           | 1            | AT2G04030                              |           |           |           |           |           |
| GO:0015979           | 1            | AT3G56090                              |           |           |           |           |           |
| GO:0016020           | 3            | AT1G22410                              | AT1G56190 | AT3G56090 |           |           |           |
| GO:0016126           | 2            | AT1G11680                              | AT1G76090 |           |           |           |           |
| GO:0016209           | 1            | AT3G52960                              |           |           |           |           |           |
| GO:0016720           | 1            | AT3G12120                              |           |           |           |           |           |
| GO:0016757           | 2            | AT4G32410                              | AT5G05170 |           |           |           |           |
| GO:0016759           | 2            | AT4G32410                              | AT5G05170 |           |           |           |           |
| GO:0018119           | 1            | AT3G52960                              |           |           |           |           |           |
| GO:0019166           | 1            | AT3G55360                              |           |           |           |           |           |
| GO:0019464           | 1            | AT4G33010                              |           |           |           |           |           |
| GO:0019825           | 1            | AT1G11680                              |           |           |           |           |           |
| GO:0019856           | 1            | AT4G22930                              |           |           |           |           |           |
| GO:0030244           | 2            | AT4G32410                              | AT5G05170 |           |           |           |           |
| GO:0042538           | 1            | AT4G32410                              |           |           |           |           |           |
| GO:0042742           | 2            | AT2G43710                              | AT3G52960 |           |           |           |           |
| GO:0043295           | 1            | AT2G30870                              |           |           |           |           |           |
| GO:0045300           | 1            | AT2G43710                              |           |           |           |           |           |
| GO:0045309           | 1            | AT1G78300                              |           |           |           |           |           |
| GO:0045485           | 1            | AT3G12120                              |           |           |           |           |           |
| GO:0046686           | 6            | AT1G56190                              | AT2G30870 | AT4G16760 | AT4G24280 | AT5G52920 | AT5G60160 |
| GO:0048046           | 2            | AT2G30870                              | AT4G33010 |           |           |           |           |
| GO:0048316           | 1            | AT5G52920                              |           |           |           |           |           |
| GO:0048366           | 1            | AT3G56090                              |           |           |           |           |           |
| GO:0051607           | 1            | AT2G43710                              |           |           |           |           |           |
| GO:0055046           | 1            | AT1G74260                              |           |           |           |           |           |
| GO:0055072           | 1            | AT3G56090                              |           |           |           |           |           |

### Cluster 10

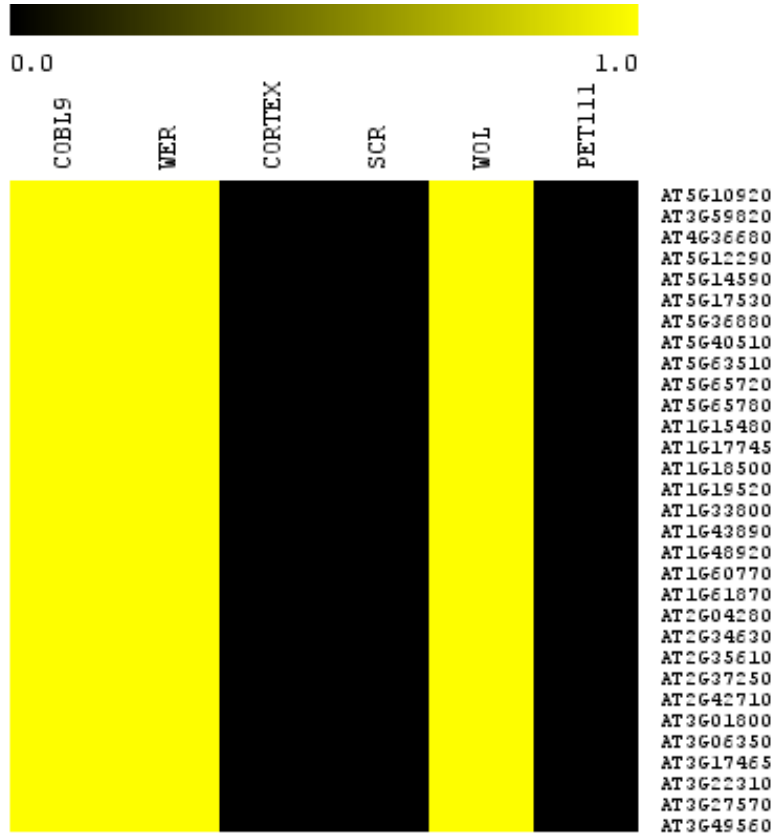

### Cluster 10

AT1G15480  
AT1G17745  
AT1G18500  
AT1G19520  
AT1G33800  
AT1G43890  
AT1G48920  
AT1G60770  
AT1G61870  
AT2G04280  
AT2G34630  
AT2G35610  
AT2G37250  
AT2G42710  
AT3G01800  
AT3G06350  
AT3G17465  
AT3G22310  
AT3G27570  
AT3G49560  
AT3G59820  
AT4G36680  
AT5G10920  
AT5G12290  
AT5G14590  
AT5G17530  
AT5G36880

**Cluster 10 (con.)**

AT5G40510

AT5G63510

AT5G65720

AT5G65780

| Cluster 10<br>GO identifier | Description                                                  | #<br>Associated<br>to the GO<br>in Cluster | Total # in<br>Cluster | p-value     |
|-----------------------------|--------------------------------------------------------------|--------------------------------------------|-----------------------|-------------|
| GO:0005739                  | mitochondrion                                                | 12                                         | 31                    | 4.06E-10    |
| GO:0009507                  | chloroplast                                                  | 11                                         | 31                    | 2.74E-04    |
| GO:0048367                  | shoot development                                            | 2                                          | 31                    | 0.001356397 |
| GO:0000478                  | endonucleolytic cleavages during rRNA processing             | 1                                          | 31                    | 0.001486454 |
| GO:0003855                  | 3-dehydroquinate dehydratase activity                        | 1                                          | 31                    | 0.001486454 |
| GO:0004056                  | argininosuccinate lyase activity                             | 1                                          | 31                    | 0.001486454 |
| GO:0004764                  | shikimate 5-dehydrogenase activity                           | 1                                          | 31                    | 0.001486454 |
| GO:0009570                  | chloroplast stroma                                           | 4                                          | 31                    | 0.001625979 |
| GO:0003987                  | acetate-CoA ligase activity                                  | 1                                          | 31                    | 0.002968631 |
| GO:0004617                  | phosphoglycerate dehydrogenase activity                      | 1                                          | 31                    | 0.002968631 |
| GO:0031071                  | cysteine desulfurase activity                                | 1                                          | 31                    | 0.002968631 |
| GO:0048364                  | root development                                             | 2                                          | 31                    | 0.00444309  |
| GO:0004161                  | dimethylallyltranstransferase activity                       | 1                                          | 31                    | 0.004446541 |
| GO:0004450                  | isocitrate dehydrogenase (NADP+) activity                    | 1                                          | 31                    | 0.004446541 |
| GO:0016868                  | intramolecular transferase activity, phosphotransferases     | 1                                          | 31                    | 0.004446541 |
| GO:0042450                  | arginine biosynthetic process via ornithine                  | 1                                          | 31                    | 0.004446541 |
| GO:0050665                  | hydrogen peroxide biosynthetic process                       | 1                                          | 31                    | 0.004446541 |
| GO:0003852                  | 2-isopropylmalate synthase activity                          | 1                                          | 31                    | 0.005920192 |
| GO:0004017                  | adenylate kinase activity                                    | 1                                          | 31                    | 0.005920192 |
| GO:0004084                  | branched-chain-amino-acid transaminase activity              | 1                                          | 31                    | 0.005920192 |
| GO:0006564                  | L-serine biosynthetic process                                | 1                                          | 31                    | 0.005920192 |
| GO:0009098                  | leucine biosynthetic process                                 | 1                                          | 31                    | 0.005920192 |
| GO:0019201                  | nucleotide kinase activity                                   | 1                                          | 31                    | 0.005920192 |
| GO:0050661                  | NADP or NADPH binding                                        | 1                                          | 31                    | 0.005920192 |
| GO:0015031                  | protein transport                                            | 2                                          | 31                    | 0.006499735 |
| GO:0008652                  | amino acid biosynthetic process                              | 1                                          | 31                    | 0.007389592 |
| GO:0006412                  | translation                                                  | 3                                          | 31                    | 0.008559136 |
| GO:0009081                  | branched chain family amino acid metabolic process           | 1                                          | 31                    | 0.008854752 |
| GO:0016208                  | AMP binding                                                  | 1                                          | 31                    | 0.010315679 |
| GO:0019375                  | galactolipid biosynthetic process                            | 1                                          | 31                    | 0.010315679 |
| GO:0006526                  | arginine biosynthetic process                                | 1                                          | 31                    | 0.011772382 |
| GO:0009536                  | plastid                                                      | 2                                          | 31                    | 0.014996436 |
| GO:0003824                  | catalytic activity                                           | 3                                          | 31                    | 0.015141447 |
| GO:0010588                  | cotyledon vascular tissue pattern formation                  | 1                                          | 31                    | 0.016117241 |
| GO:0004089                  | carbonate dehydratase activity                               | 1                                          | 31                    | 0.021851791 |
| GO:0005741                  | mitochondrial outer membrane                                 | 1                                          | 31                    | 0.024694111 |
| GO:0010305                  | leaf vascular tissue pattern formation                       | 1                                          | 31                    | 0.024694111 |
| GO:0016226                  | iron-sulfur cluster assembly                                 | 1                                          | 31                    | 0.024694111 |
| GO:0008483                  | transaminase activity                                        | 1                                          | 31                    | 0.026109063 |
| GO:0031966                  | mitochondrial membrane                                       | 1                                          | 31                    | 0.027519887 |
| GO:0005840                  | ribosome                                                     | 2                                          | 31                    | 0.027915355 |
| GO:0005744                  | mitochondrial inner membrane presequence translocase complex | 1                                          | 31                    | 0.028926594 |
| GO:0006364                  | rRNA processing                                              | 1                                          | 31                    | 0.037280823 |
| GO:0008152                  | metabolic process                                            | 3                                          | 31                    | 0.040222226 |
| GO:0009853                  | photorespiration                                             | 1                                          | 31                    | 0.041403033 |

| Cluster 10<br>GO identifier<br>(con.) | Description                                                           | #<br>Associated<br>to the GO<br>in Cluster | Total # in<br>Cluster | p-value     |
|---------------------------------------|-----------------------------------------------------------------------|--------------------------------------------|-----------------------|-------------|
| GO:0009790                            | embryonic development                                                 | 1                                          | 31                    | 0.044130994 |
| GO:0015934                            | large ribosomal subunit                                               | 1                                          | 31                    | 0.048192837 |
| GO:0045271                            | respiratory chain complex I                                           | 1                                          | 31                    | 0.052218765 |
| GO:0003735                            | structural constituent of ribosome                                    | 2                                          | 31                    | 0.057884344 |
| GO:0015450                            | P-P-bond-hydrolysis-driven protein transmembrane transporter activity | 1                                          | 31                    | 0.060163778 |
| GO:0007264                            | small GTPase mediated signal transduction                             | 1                                          | 31                    | 0.084401491 |
| GO:0048366                            | leaf development                                                      | 1                                          | 31                    | 0.100199532 |
| GO:0005488                            | binding                                                               | 2                                          | 31                    | 0.112587457 |
| GO:0042254                            | ribosome biogenesis                                                   | 1                                          | 31                    | 0.121056689 |
| GO:0005794                            | Golgi apparatus                                                       | 1                                          | 31                    | 0.158386534 |
| GO:0016020                            | membrane                                                              | 3                                          | 31                    | 0.185092935 |
| GO:0005509                            | calcium ion binding                                                   | 1                                          | 31                    | 0.189009512 |
| GO:0006355                            | regulation of transcription, DNA-dependent                            | 2                                          | 31                    | 0.197253253 |
| GO:0005525                            | GTP binding                                                           | 1                                          | 31                    | 0.202277795 |
| GO:0005730                            | nucleolus                                                             | 1                                          | 31                    | 0.251019391 |
| GO:0009793                            | embryonic development ending in seed dormancy                         | 1                                          | 31                    | 0.277191974 |
| GO:0009651                            | response to salt stress                                               | 1                                          | 31                    | 0.282967286 |
| GO:0005975                            | carbohydrate metabolic process                                        | 1                                          | 31                    | 0.287970339 |
| GO:0003676                            | nucleic acid binding                                                  | 1                                          | 31                    | 0.306682031 |
| GO:0009941                            | chloroplast envelope                                                  | 1                                          | 31                    | 0.321801347 |
| GO:0005737                            | cytoplasm                                                             | 1                                          | 31                    | 0.340672641 |
| GO:0005524                            | ATP binding                                                           | 1                                          | 31                    | 0.373204805 |

### Cluster 10

| <u>GO Identifier</u> | <u>#Loci</u> | <u>Associated Loci (Left to Right)</u> |           |           |           |           |           |
|----------------------|--------------|----------------------------------------|-----------|-----------|-----------|-----------|-----------|
| GO:0000478           | 1            | AT1G48920                              |           |           |           |           |           |
| GO:0003676           | 1            | AT1G48920                              |           |           |           |           |           |
| GO:0003735           | 2            | AT2G42710                              | AT3G17465 |           |           |           |           |
| GO:0003824           | 3            | AT3G06350                              | AT5G36880 | AT5G65780 |           |           |           |
| GO:0003852           | 1            | AT1G18500                              |           |           |           |           |           |
| GO:0003855           | 1            | AT3G06350                              |           |           |           |           |           |
| GO:0003987           | 1            | AT5G36880                              |           |           |           |           |           |
| GO:0004017           | 1            | AT2G37250                              |           |           |           |           |           |
| GO:0004056           | 1            | AT5G10920                              |           |           |           |           |           |
| GO:0004084           | 1            | AT5G65780                              |           |           |           |           |           |
| GO:0004089           | 1            | AT5G63510                              |           |           |           |           |           |
| GO:0004161           | 1            | AT2G34630                              |           |           |           |           |           |
| GO:0004450           | 1            | AT5G14590                              |           |           |           |           |           |
| GO:0004617           | 1            | AT1G17745                              |           |           |           |           |           |
| GO:0004764           | 1            | AT3G06350                              |           |           |           |           |           |
| GO:0005488           | 2            | AT1G60770                              | AT3G06350 |           |           |           |           |
| GO:0005509           | 1            | AT3G59820                              |           |           |           |           |           |
| GO:0005524           | 1            | AT5G65720                              |           |           |           |           |           |
| GO:0005525           | 1            | AT1G43890                              |           |           |           |           |           |
| GO:0005730           | 1            | AT1G48920                              |           |           |           |           |           |
| GO:0005737           | 1            | AT2G37250                              |           |           |           |           |           |
| GO:0005739           | 12           | AT1G60770                              | AT1G61870 | AT3G01800 | AT3G17465 | AT3G49560 | AT3G59820 |
|                      |              | AT4G36680                              | AT5G12290 | AT5G14590 | AT5G63510 | AT5G65720 | AT5G65780 |
| GO:0005741           | 1            | AT5G12290                              |           |           |           |           |           |
| GO:0005744           | 1            | AT3G49560                              |           |           |           |           |           |
| GO:0005794           | 1            | AT2G35610                              |           |           |           |           |           |
| GO:0005840           | 2            | AT2G42710                              | AT3G17465 |           |           |           |           |
| GO:0005975           | 1            | AT5G17530                              |           |           |           |           |           |

**Cluster 10 (con.)**

| <b>GO Identifier</b> | <b>#Loci</b> | <b>Associated Loci (Left to Right)</b> |           |           |           |           |           |
|----------------------|--------------|----------------------------------------|-----------|-----------|-----------|-----------|-----------|
| GO:0006355           | 2            | AT1G19520                              | AT1G43890 |           |           |           |           |
| GO:0006364           | 1            | AT1G48920                              |           |           |           |           |           |
| GO:0006412           | 3            | AT2G42710                              | AT3G01800 | AT3G17465 |           |           |           |
| GO:0006526           | 1            | AT5G10920                              |           |           |           |           |           |
| GO:0006564           | 1            | AT1G17745                              |           |           |           |           |           |
| GO:0007264           | 1            | AT1G43890                              |           |           |           |           |           |
| GO:0008152           | 3            | AT5G14590                              | AT5G36880 | AT5G65780 |           |           |           |
| GO:0008483           | 1            | AT5G65720                              |           |           |           |           |           |
| GO:0008652           | 1            | AT2G37250                              |           |           |           |           |           |
| GO:0009081           | 1            | AT5G65780                              |           |           |           |           |           |
| GO:0009098           | 1            | AT1G18500                              |           |           |           |           |           |
| GO:0009507           | 11           | AT1G17745                              | AT1G18500 | AT2G34630 | AT2G37250 | AT3G06350 | AT3G49560 |
|                      |              | AT5G10920                              | AT5G14590 | AT5G17530 | AT5G36880 | AT5G65780 |           |
| GO:0009536           | 2            | AT2G34630                              | AT3G49560 |           |           |           |           |
| GO:0009570           | 4            | AT2G37250                              | AT3G06350 | AT5G10920 | AT5G36880 |           |           |
| GO:0009651           | 1            | AT5G63510                              |           |           |           |           |           |
| GO:0009790           | 1            | AT2G34630                              |           |           |           |           |           |
| GO:0009793           | 1            | AT3G06350                              |           |           |           |           |           |
| GO:0009853           | 1            | AT5G63510                              |           |           |           |           |           |
| GO:0009941           | 1            | AT3G49560                              |           |           |           |           |           |
| GO:0010305           | 1            | AT1G48920                              |           |           |           |           |           |
| GO:0010588           | 1            | AT1G48920                              |           |           |           |           |           |
| GO:0015031           | 2            | AT1G43890                              | AT3G49560 |           |           |           |           |
| GO:0015450           | 1            | AT3G49560                              |           |           |           |           |           |
| GO:0015934           | 1            | AT2G42710                              |           |           |           |           |           |
| GO:0016020           | 3            | AT1G61870                              | AT3G49560 | AT5G63510 |           |           |           |
| GO:0016208           | 1            | AT5G36880                              |           |           |           |           |           |
| GO:0016226           | 1            | AT5G65720                              |           |           |           |           |           |
| GO:0016868           | 1            | AT5G17530                              |           |           |           |           |           |
| GO:0019201           | 1            | AT2G37250                              |           |           |           |           |           |
| GO:0019375           | 1            | AT5G12290                              |           |           |           |           |           |
| GO:0031071           | 1            | AT5G65720                              |           |           |           |           |           |
| GO:0031966           | 1            | AT5G63510                              |           |           |           |           |           |
| GO:0042254           | 1            | AT1G48920                              |           |           |           |           |           |
| GO:0042450           | 1            | AT5G10920                              |           |           |           |           |           |
| GO:0045271           | 1            | AT5G63510                              |           |           |           |           |           |
| GO:0048364           | 2            | AT1G48920                              | AT2G37250 |           |           |           |           |
| GO:0048366           | 1            | AT1G48920                              |           |           |           |           |           |
| GO:0048367           | 2            | AT1G48920                              | AT2G37250 |           |           |           |           |
| GO:0050661           | 1            | AT3G06350                              |           |           |           |           |           |
| GO:0050665           | 1            | AT5G12290                              |           |           |           |           |           |



## Cluster 11

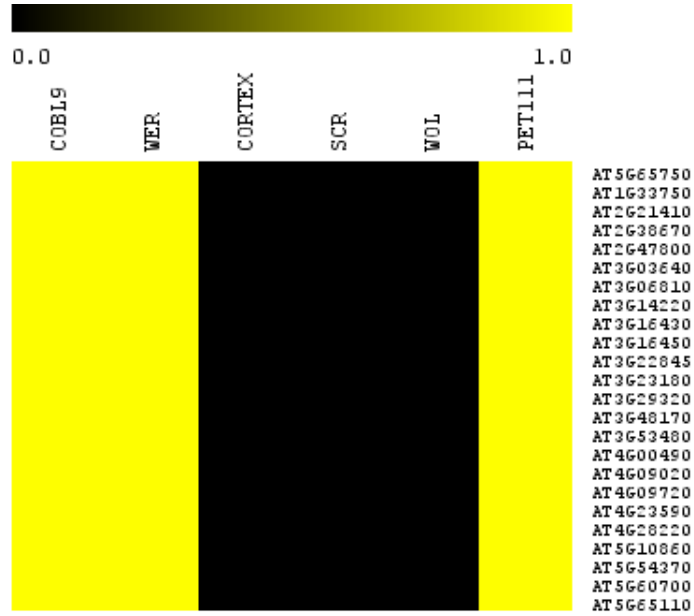

### Cluster 11

AT1G33750  
AT2G21410  
AT2G38670  
AT2G47800  
AT3G03640  
AT3G06810  
AT3G14220  
AT3G16430  
AT3G16450  
AT3G22845  
AT3G23180  
AT3G29320  
AT3G48170  
AT3G53480  
AT4G00490  
AT4G09020  
AT4G09720  
AT4G23590  
AT4G28220  
AT5G10860  
AT5G54370  
AT5G60700  
AT5G65110  
AT5G65750

| Cluster 11<br>GO identifier<br>(con.) | Description                                                      | #<br>Associated<br>to the GO<br>in Cluster | Total # in<br>Cluster | p-value     |
|---------------------------------------|------------------------------------------------------------------|--------------------------------------------|-----------------------|-------------|
| GO:0000325                            | plant-type vacuole                                               | 2                                          | 24                    | 4.67E-04    |
| GO:0005774                            | vacuolar membrane                                                | 2                                          | 24                    | 9.51E-04    |
| GO:0003995                            | acyl-CoA dehydrogenase activity                                  | 1                                          | 24                    | 0.001150803 |
| GO:0004306                            | ethanolamine-phosphate cytidyltransferase activity               | 1                                          | 24                    | 0.001150803 |
| GO:0006646                            | phosphatidylethanolamine biosynthetic process                    | 1                                          | 24                    | 0.001150803 |
| GO:0009569                            | chloroplast starch grain                                         | 1                                          | 24                    | 0.001150803 |
| GO:0006855                            | multidrug transport                                              | 2                                          | 24                    | 0.001200722 |
| GO:0005773                            | vacuole                                                          | 4                                          | 24                    | 0.001394632 |
| GO:0004591                            | oxoglutarate dehydrogenase (succinyl-transferring) activity      | 1                                          | 24                    | 0.002299068 |
| GO:0004645                            | phosphorylase activity                                           | 1                                          | 24                    | 0.002299068 |
| GO:0019285                            | glycine betaine biosynthetic process from choline                | 1                                          | 24                    | 0.002299068 |
| GO:0008517                            | folic acid transporter activity                                  | 1                                          | 24                    | 0.003444798 |
| GO:0015036                            | disulfide oxidoreductase activity                                | 1                                          | 24                    | 0.003444798 |
| GO:0019156                            | isoamylase activity                                              | 1                                          | 24                    | 0.003444798 |
| GO:0031314                            | extrinsic to mitochondrial inner membrane                        | 1                                          | 24                    | 0.003444798 |
| GO:0009058                            | biosynthetic process                                             | 2                                          | 24                    | 0.003964584 |
| GO:0005975                            | carbohydrate metabolic process                                   | 3                                          | 24                    | 0.004334075 |
| GO:0042626                            | ATPase activity, coupled to transmembrane movement of substances | 2                                          | 24                    | 0.004339927 |
| GO:0001676                            | long-chain fatty acid metabolic process                          | 1                                          | 24                    | 0.004587998 |
| GO:0000272                            | polysaccharide catabolic process                                 | 1                                          | 24                    | 0.005728671 |
| GO:0003997                            | acyl-CoA oxidase activity                                        | 1                                          | 24                    | 0.005728671 |
| GO:0005777                            | peroxisome                                                       | 2                                          | 24                    | 0.006904417 |
| GO:0003954                            | NADH dehydrogenase activity                                      | 1                                          | 24                    | 0.008002455 |
| GO:0004556                            | alpha-amylase activity                                           | 1                                          | 24                    | 0.009135573 |
| GO:0005739                            | mitochondrion                                                    | 4                                          | 24                    | 0.009228822 |
| GO:0009414                            | response to water deprivation                                    | 2                                          | 24                    | 0.010110124 |
| GO:0016161                            | beta-amylase activity                                            | 1                                          | 24                    | 0.010266181 |
| GO:0009266                            | response to temperature stimulus                                 | 1                                          | 24                    | 0.012519881 |
| GO:0005983                            | starch catabolic process                                         | 1                                          | 24                    | 0.014763587 |
| GO:0004028                            | 3-chloroallyl aldehyde dehydrogenase activity                    | 1                                          | 24                    | 0.015881702 |
| GO:0008483                            | transaminase activity                                            | 1                                          | 24                    | 0.020329335 |
| GO:0010118                            | stomatal movement                                                | 1                                          | 24                    | 0.020329335 |
| GO:0000287                            | magnesium ion binding                                            | 1                                          | 24                    | 0.026926736 |
| GO:0006635                            | fatty acid beta-oxidation                                        | 1                                          | 24                    | 0.026926736 |
| GO:0015992                            | proton transport                                                 | 1                                          | 24                    | 0.029106249 |
| GO:0009705                            | plant-type vacuole membrane                                      | 1                                          | 24                    | 0.04197948  |
| GO:0016829                            | lyase activity                                                   | 1                                          | 24                    | 0.053477012 |
| GO:0009570                            | chloroplast stroma                                               | 2                                          | 24                    | 0.054519    |
| GO:0009624                            | response to nematode                                             | 1                                          | 24                    | 0.056563108 |
| GO:0007264                            | small GTPase mediated signal transduction                        | 1                                          | 24                    | 0.066698537 |
| GO:0005886                            | plasma membrane                                                  | 4                                          | 24                    | 0.082172093 |
| GO:0015031                            | protein transport                                                | 1                                          | 24                    | 0.087237669 |
| GO:0004091                            | carboxylesterase activity                                        | 1                                          | 24                    | 0.104059853 |
| GO:0008152                            | metabolic process                                                | 2                                          | 24                    | 0.108807748 |
| GO:0009611                            | response to wounding                                             | 1                                          | 24                    | 0.109510535 |
| GO:0016887                            | ATPase activity                                                  | 1                                          | 24                    | 0.11577228  |
| GO:0009536                            | plastid                                                          | 1                                          | 24                    | 0.129697167 |
| GO:0006629                            | lipid metabolic process                                          | 1                                          | 24                    | 0.143094005 |
| GO:0004553                            | hydrolase activity, hydrolyzing O-glycosyl compounds             | 1                                          | 24                    | 0.153599566 |
| GO:0009507                            | chloroplast                                                      | 4                                          | 24                    | 0.155799678 |
| GO:0005525                            | GTP binding                                                      | 1                                          | 24                    | 0.166073957 |

| Cluster 11<br>GO identifier | Description                                        | #<br>Associated<br>to the GO<br>in Cluster | Total # in<br>Cluster | p-value     |
|-----------------------------|----------------------------------------------------|--------------------------------------------|-----------------------|-------------|
| GO:0009409                  | response to cold                                   | 1                                          | 24                    | 0.175847745 |
| GO:0016491                  | oxidoreductase activity                            | 1                                          | 24                    | 0.202625701 |
| GO:0046686                  | response to cadmium ion                            | 1                                          | 24                    | 0.235183418 |
| GO:0009651                  | response to salt stress                            | 1                                          | 24                    | 0.241499194 |
| GO:0016757                  | transferase activity, transferring glycosyl groups | 1                                          | 24                    | 0.245972133 |
| GO:0006810                  | transport                                          | 1                                          | 24                    | 0.257762225 |
| GO:0006355                  | regulation of transcription, DNA-dependent         | 1                                          | 24                    | 0.368510249 |

### Cluster 11

| <u>GO Identifier</u> | <u>#Loci</u> | <u>Associated Loci (Left to Right)</u> |           |           |           |
|----------------------|--------------|----------------------------------------|-----------|-----------|-----------|
| GO:0000272           | 1            | AT4G00490                              |           |           |           |
| GO:0000287           | 1            | AT1G33750                              |           |           |           |
| GO:0000325           | 2            | AT2G21410                              | AT2G47800 |           |           |
| GO:0001676           | 1            | AT5G65110                              |           |           |           |
| GO:0003954           | 1            | AT4G28220                              |           |           |           |
| GO:0003995           | 1            | AT3G06810                              |           |           |           |
| GO:0003997           | 1            | AT5G65110                              |           |           |           |
| GO:0004028           | 1            | AT3G48170                              |           |           |           |
| GO:0004091           | 1            | AT3G14220                              |           |           |           |
| GO:0004306           | 1            | AT2G38670                              |           |           |           |
| GO:0004553           | 1            | AT3G03640                              |           |           |           |
| GO:0004556           | 1            | AT4G09020                              |           |           |           |
| GO:0004591           | 1            | AT5G65750                              |           |           |           |
| GO:0004645           | 1            | AT3G29320                              |           |           |           |
| GO:0005525           | 1            | AT4G09720                              |           |           |           |
| GO:0005739           | 4            | AT2G21410                              | AT2G38670 | AT5G10860 | AT5G65750 |
| GO:0005773           | 4            | AT2G21410                              | AT2G47800 | AT3G14220 | AT3G22845 |
| GO:0005774           | 2            | AT2G21410                              | AT2G47800 |           |           |
| GO:0005777           | 2            | AT3G48170                              | AT5G65110 |           |           |
| GO:0005886           | 4            | AT2G21410                              | AT2G47800 | AT3G53480 | AT4G09720 |
| GO:0005975           | 3            | AT3G03640                              | AT4G00490 | AT4G09020 |           |
| GO:0005983           | 1            | AT4G09020                              |           |           |           |
| GO:0006355           | 1            | AT4G09720                              |           |           |           |
| GO:0006629           | 1            | AT3G14220                              |           |           |           |
| GO:0006635           | 1            | AT5G65110                              |           |           |           |
| GO:0006646           | 1            | AT2G38670                              |           |           |           |
| GO:0006810           | 1            | AT3G22845                              |           |           |           |
| GO:0006855           | 2            | AT2G47800                              | AT3G53480 |           |           |
| GO:0007264           | 1            | AT4G09720                              |           |           |           |
| GO:0008152           | 2            | AT1G33750                              | AT3G48170 |           |           |
| GO:0008483           | 1            | AT4G23590                              |           |           |           |
| GO:0008517           | 1            | AT2G47800                              |           |           |           |
| GO:0009058           | 2            | AT2G38670                              | AT4G23590 |           |           |
| GO:0009266           | 1            | AT3G29320                              |           |           |           |
| GO:0009409           | 1            | AT3G16450                              |           |           |           |
| GO:0009414           | 2            | AT2G47800                              | AT3G29320 |           |           |
| GO:0009507           | 4            | AT2G21410                              | AT3G29320 | AT4G00490 | AT4G09020 |
| GO:0009536           | 1            | AT3G29320                              |           |           |           |
| GO:0009569           | 1            | AT4G09020                              |           |           |           |
| GO:0009570           | 2            | AT3G29320                              | AT4G09020 |           |           |
| GO:0009611           | 1            | AT2G47800                              |           |           |           |
| GO:0009624           | 1            | AT2G47800                              |           |           |           |
| GO:0009651           | 1            | AT5G10860                              |           |           |           |
| GO:0009705           | 1            | AT2G21410                              |           |           |           |

**Cluster 11 (con.)**

| <u>GO Identifier</u> | <u>#Loci</u> | <u>Associated Loci (Left to Right)</u> |
|----------------------|--------------|----------------------------------------|
| GO:0010118           | 1            | AT2G47800                              |
| GO:0015031           | 1            | AT4G09720                              |
| GO:0015036           | 1            | AT4G28220                              |
| GO:0015992           | 1            | AT2G21410                              |
| GO:0016161           | 1            | AT4G00490                              |
| GO:0016491           | 1            | AT3G06810                              |
| GO:0016757           | 1            | AT3G29320                              |
| GO:0016829           | 1            | AT1G33750                              |
| GO:0016887           | 1            | AT2G21410                              |
| GO:0019156           | 1            | AT4G09020                              |
| GO:0019285           | 1            | AT3G48170                              |
| GO:0031314           | 1            | AT4G28220                              |
| GO:0042626           | 2            | AT2G47800      AT3G53480               |
| GO:0046686           | 1            | AT5G65750                              |

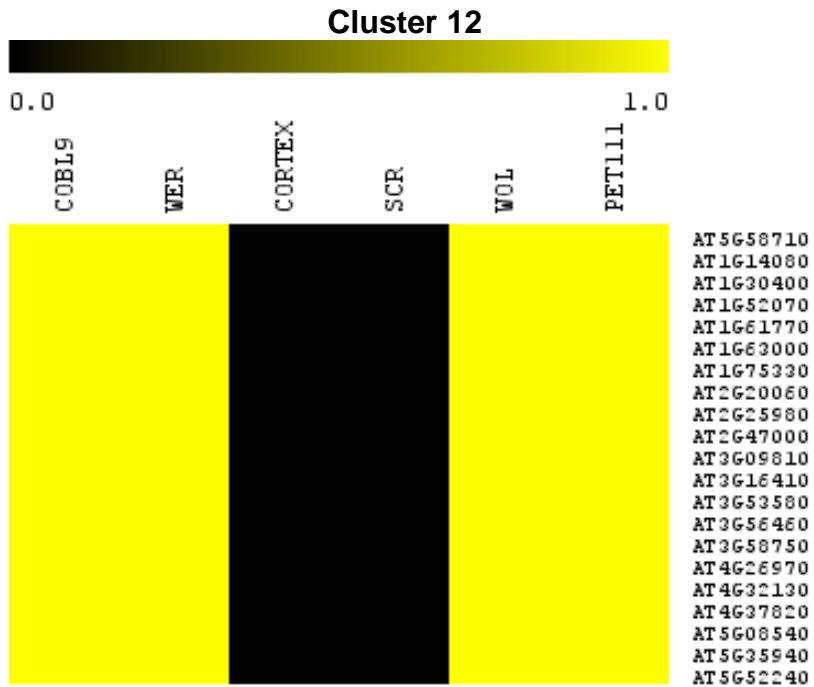

**Cluster 12**

- AT1G14080
- AT1G30400
- AT1G52070
- AT1G61770
- AT1G63000
- AT1G75330
- AT2G20060
- AT2G25980
- AT2G47000
- AT3G09810
- AT3G16410
- AT3G53580
- AT3G56460
- AT3G58750
- AT4G26970
- AT4G32130
- AT4G37820

**Cluster 12 (con.)**

AT5G08540

AT5G35940

AT5G52240

AT5G58710

| Cluster 12<br>GO identifier | Description                                                      | #<br>Associated<br>to the GO<br>in Cluster | Total # in<br>Cluster | p-value     |
|-----------------------------|------------------------------------------------------------------|--------------------------------------------|-----------------------|-------------|
| GO:0008559                  | xenobiotic-transporting ATPase activity                          | 2                                          | 21                    | 9.66E-07    |
| GO:0008830                  | dTDP-4-dehydrorhamnose 3,5-epimerase activity                    | 1                                          | 21                    | 0.001006953 |
| GO:0008831                  | dTDP-4-dehydrorhamnose reductase activity                        | 1                                          | 21                    | 0.001006953 |
| GO:0008837                  | diaminopimelate epimerase activity                               | 1                                          | 21                    | 0.001006953 |
| GO:0005496                  | steroid binding                                                  | 1                                          | 21                    | 0.002011974 |
| GO:0010315                  | auxin efflux                                                     | 1                                          | 21                    | 0.002011974 |
| GO:0010489                  | UDP-4-keto-6-deoxy-glucose-3,5-epimerase activity                | 1                                          | 21                    | 0.002011974 |
| GO:0010490                  | UDP-4-keto-rhamnose-4-keto-reductase activity                    | 1                                          | 21                    | 0.002011974 |
| GO:0016743                  | carboxyl- or carbamoyltransferase activity                       | 1                                          | 21                    | 0.002011974 |
| GO:0030308                  | negative regulation of cell growth                               | 1                                          | 21                    | 0.002011974 |
| GO:0003994                  | aconitate hydratase activity                                     | 1                                          | 21                    | 0.003015067 |
| GO:0019305                  | dTDP-rhamnose biosynthetic process                               | 1                                          | 21                    | 0.003015067 |
| GO:0042626                  | ATPase activity, coupled to transmembrane movement of substances | 2                                          | 21                    | 0.003342869 |
| GO:0010253                  | UDP-rhamnose biosynthetic process                                | 1                                          | 21                    | 0.004016233 |
| GO:0004108                  | citrate (S)-synthase activity                                    | 1                                          | 21                    | 0.005015476 |
| GO:0004449                  | isocitrate dehydrogenase (NAD+) activity                         | 1                                          | 21                    | 0.005015476 |
| GO:0005625                  | soluble fraction                                                 | 1                                          | 21                    | 0.005015476 |
| GO:0010540                  | basipetal auxin transport                                        | 1                                          | 21                    | 0.006012798 |
| GO:0009089                  | lysine biosynthetic process via diaminopimelate                  | 1                                          | 21                    | 0.008993265 |
| GO:0006099                  | tricarboxylic acid cycle                                         | 1                                          | 21                    | 0.009982929 |
| GO:0008417                  | fucosyltransferase activity                                      | 1                                          | 21                    | 0.009982929 |
| GO:0042546                  | cell wall biogenesis                                             | 1                                          | 21                    | 0.011956538 |
| GO:0048767                  | root hair elongation                                             | 1                                          | 21                    | 0.012940487 |
| GO:0016597                  | amino acid binding                                               | 1                                          | 21                    | 0.015880945 |
| GO:0006457                  | protein folding                                                  | 2                                          | 21                    | 0.016618408 |
| GO:0006520                  | amino acid metabolic process                                     | 1                                          | 21                    | 0.01685731  |
| GO:0009630                  | gravitropism                                                     | 1                                          | 21                    | 0.01685731  |
| GO:0006635                  | fatty acid beta-oxidation                                        | 1                                          | 21                    | 0.023639101 |
| GO:0005783                  | endoplasmic reticulum                                            | 2                                          | 21                    | 0.026539472 |
| GO:0000325                  | plant-type vacuole                                               | 1                                          | 21                    | 0.027473182 |
| GO:0015934                  | large ribosomal subunit                                          | 1                                          | 21                    | 0.033168516 |
| GO:0009926                  | auxin polar transport                                            | 1                                          | 21                    | 0.035052166 |
| GO:0005774                  | vacuolar membrane                                                | 1                                          | 21                    | 0.038797397 |
| GO:0009735                  | response to cytokinin stimulus                                   | 1                                          | 21                    | 0.041587089 |
| GO:0003755                  | peptidyl-prolyl cis-trans isomerase activity                     | 1                                          | 21                    | 0.051676093 |
| GO:0009507                  | chloroplast                                                      | 5                                          | 21                    | 0.053794279 |
| GO:0005886                  | plasma membrane                                                  | 4                                          | 21                    | 0.059421517 |
| GO:0008152                  | metabolic process                                                | 2                                          | 21                    | 0.089787188 |
| GO:0051082                  | unfolded protein binding                                         | 1                                          | 21                    | 0.091549839 |
| GO:0005507                  | copper ion binding                                               | 1                                          | 21                    | 0.096483036 |
| GO:0031072                  | heat shock protein binding                                       | 1                                          | 21                    | 0.097299375 |
| GO:0005777                  | peroxisome                                                       | 1                                          | 21                    | 0.100548078 |
| GO:0005794                  | Golgi apparatus                                                  | 1                                          | 21                    | 0.11406079  |
| GO:0005739                  | mitochondrion                                                    | 2                                          | 21                    | 0.139876451 |
| GO:0009733                  | response to auxin stimulus                                       | 1                                          | 21                    | 0.180625826 |
| GO:0009535                  | chloroplast thylakoid membrane                                   | 1                                          | 21                    | 0.196752999 |

| Cluster 12<br>GO identifier<br>(con.) | Description                                        | #<br>Associated<br>to the GO<br>in Cluster | Total # in<br>Cluster | p-value     |
|---------------------------------------|----------------------------------------------------|--------------------------------------------|-----------------------|-------------|
| GO:0046686                            | response to cadmium ion                            | 1                                          | 21                    | 0.214217213 |
| GO:0003735                            | structural constituent of ribosome                 | 1                                          | 21                    | 0.217567324 |
| GO:0006412                            | translation                                        | 1                                          | 21                    | 0.224128119 |
| GO:0016757                            | transferase activity, transferring glycosyl groups | 1                                          | 21                    | 0.224666538 |
| GO:0016020                            | membrane                                           | 2                                          | 21                    | 0.244978296 |
| GO:0009570                            | chloroplast stroma                                 | 1                                          | 21                    | 0.253313139 |
| GO:0009941                            | chloroplast envelope                               | 1                                          | 21                    | 0.260658257 |
| GO:0005773                            | vacuole                                            | 1                                          | 21                    | 0.290570085 |
| GO:0008270                            | zinc ion binding                                   | 1                                          | 21                    | 0.35914802  |

### Cluster 12 (con.)

#### **GO Identifier #Loci Associated Loci (Left to Right)**

|            |   |           |           |           |           |           |
|------------|---|-----------|-----------|-----------|-----------|-----------|
| GO:0000325 | 1 | AT1G30400 |           |           |           |           |
| GO:0003735 | 1 | AT2G20060 |           |           |           |           |
| GO:0003755 | 1 | AT5G58710 |           |           |           |           |
| GO:0003994 | 1 | AT4G26970 |           |           |           |           |
| GO:0004108 | 1 | AT3G58750 |           |           |           |           |
| GO:0004449 | 1 | AT3G09810 |           |           |           |           |
| GO:0005496 | 1 | AT5G52240 |           |           |           |           |
| GO:0005507 | 1 | AT4G26970 |           |           |           |           |
| GO:0005625 | 1 | AT1G63000 |           |           |           |           |
| GO:0005739 | 2 | AT3G09810 | AT4G26970 |           |           |           |
| GO:0005773 | 1 | AT1G30400 |           |           |           |           |
| GO:0005774 | 1 | AT1G30400 |           |           |           |           |
| GO:0005777 | 1 | AT3G58750 |           |           |           |           |
| GO:0005783 | 2 | AT1G61770 | AT5G52240 |           |           |           |
| GO:0005794 | 1 | AT4G37820 |           |           |           |           |
| GO:0005886 | 4 | AT1G30400 | AT1G63000 | AT2G47000 | AT5G52240 |           |
| GO:0006099 | 1 | AT3G58750 |           |           |           |           |
| GO:0006412 | 1 | AT2G20060 |           |           |           |           |
| GO:0006457 | 2 | AT1G61770 | AT5G58710 |           |           |           |
| GO:0006520 | 1 | AT1G75330 |           |           |           |           |
| GO:0006635 | 1 | AT3G58750 |           |           |           |           |
| GO:0008152 | 2 | AT3G09810 | AT3G56460 |           |           |           |
| GO:0008270 | 1 | AT3G56460 |           |           |           |           |
| GO:0008417 | 1 | AT1G14080 |           |           |           |           |
| GO:0008559 | 2 | AT1G30400 | AT2G47000 |           |           |           |
| GO:0008830 | 1 | AT1G63000 |           |           |           |           |
| GO:0008831 | 1 | AT1G63000 |           |           |           |           |
| GO:0008837 | 1 | AT3G53580 |           |           |           |           |
| GO:0009089 | 1 | AT3G53580 |           |           |           |           |
| GO:0009507 | 5 | AT1G75330 | AT3G53580 | AT4G26970 | AT5G08540 | AT5G58710 |
| GO:0009535 | 1 | AT5G08540 |           |           |           |           |
| GO:0009570 | 1 | AT1G75330 |           |           |           |           |
| GO:0009630 | 1 | AT2G47000 |           |           |           |           |
| GO:0009733 | 1 | AT2G47000 |           |           |           |           |
| GO:0009735 | 1 | AT2G47000 |           |           |           |           |
| GO:0009926 | 1 | AT2G47000 |           |           |           |           |
| GO:0009941 | 1 | AT5G08540 |           |           |           |           |
| GO:0010253 | 1 | AT1G63000 |           |           |           |           |
| GO:0010315 | 1 | AT2G47000 |           |           |           |           |
| GO:0010489 | 1 | AT1G63000 |           |           |           |           |
| GO:0010490 | 1 | AT1G63000 |           |           |           |           |
| GO:0010540 | 1 | AT2G47000 |           |           |           |           |

**Cluster 12 (con.)**

| <b>GO Identifier</b> | <b>#Loci</b> | <b>Associated Loci (Left to Right)</b> |
|----------------------|--------------|----------------------------------------|
| GO:0015934           | 1            | AT2G20060                              |
| GO:0016020           | 2            | AT1G14080 AT2G47000                    |
| GO:0016597           | 1            | AT1G75330                              |
| GO:0016743           | 1            | AT1G75330                              |
| GO:0016757           | 1            | AT1G14080                              |
| GO:0019305           | 1            | AT1G63000                              |
| GO:0030308           | 1            | AT5G52240                              |
| GO:0031072           | 1            | AT1G61770                              |
| GO:0042546           | 1            | AT1G14080                              |
| GO:0042626           | 2            | AT1G30400 AT2G47000                    |
| GO:0046686           | 1            | AT4G26970                              |
| GO:0048767           | 1            | AT2G47000                              |
| GO:0051082           | 1            | AT1G61770                              |

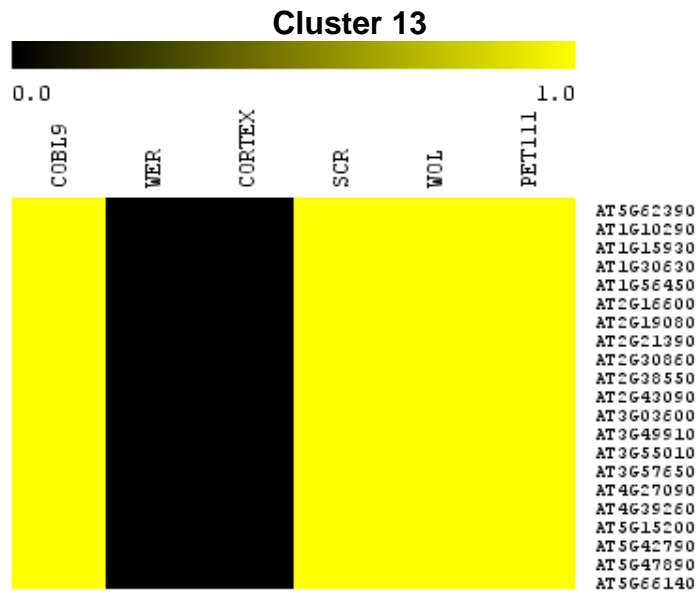

**Cluster 13**

- AT1G10290
- AT1G15930
- AT1G30630
- AT1G56450
- AT2G16600
- AT2G19080
- AT2G21390
- AT2G30860
- AT2G38550
- AT2G43090
- AT3G03600
- AT3G49910
- AT3G55010
- AT3G57650
- AT4G27090
- AT4G39260
- AT5G15200
- AT5G42790
- AT5G47890
- AT5G62390
- AT5G66140

| Cluster 13<br>GO identifier | Description                                                                                  | #<br>Associated<br>to the GO<br>in Cluster | Total # in<br>Cluster | p-value     |
|-----------------------------|----------------------------------------------------------------------------------------------|--------------------------------------------|-----------------------|-------------|
| GO:0022626                  | cytosolic ribosome                                                                           | 5                                          | 21                    | 5.57E-07    |
| GO:0005839                  | proteasome core complex                                                                      | 3                                          | 21                    | 9.88E-07    |
| GO:0005886                  | plasma membrane                                                                              | 10                                         | 21                    | 1.49E-06    |
| GO:0003735                  | structural constituent of ribosome                                                           | 5                                          | 21                    | 7.42E-06    |
| GO:0006412                  | translation                                                                                  | 5                                          | 21                    | 9.05E-06    |
| GO:0008233                  | peptidase activity                                                                           | 3                                          | 21                    | 1.29E-05    |
| GO:0009507                  | chloroplast                                                                                  | 10                                         | 21                    | 2.97E-05    |
| GO:0005730                  | nucleolus                                                                                    | 4                                          | 21                    | 8.17E-05    |
| GO:0009651                  | response to salt stress                                                                      | 4                                          | 21                    | 1.71E-04    |
| GO:0006511                  | ubiquitin-dependent protein catabolic process                                                | 3                                          | 21                    | 8.42E-04    |
| GO:0004641                  | phosphoribosylformylglycinamide cyclo-ligase activity                                        | 1                                          | 21                    | 0.001006953 |
| GO:0016655                  | oxidoreductase activity, acting on NADH or NADPH,<br>quinone or similar compound as acceptor | 1                                          | 21                    | 0.002011974 |
| GO:0019773                  | proteasome core complex, alpha-subunit complex                                               | 1                                          | 21                    | 0.002011974 |
| GO:0005783                  | endoplasmic reticulum                                                                        | 3                                          | 21                    | 0.002148839 |
| GO:0022627                  | cytosolic small ribosomal subunit                                                            | 2                                          | 21                    | 0.002841847 |
| GO:0022625                  | cytosolic large ribosomal subunit                                                            | 2                                          | 21                    | 0.004370869 |
| GO:0005763                  | mitochondrial small ribosomal subunit                                                        | 1                                          | 21                    | 0.005015476 |
| GO:0006890                  | retrograde vesicle-mediated transport, Golgi to ER                                           | 1                                          | 21                    | 0.005015476 |
| GO:0006896                  | Golgi to vacuole transport                                                                   | 1                                          | 21                    | 0.005015476 |
| GO:0016836                  | hydro-lyase activity                                                                         | 1                                          | 21                    | 0.005015476 |
| GO:0005739                  | mitochondrion                                                                                | 4                                          | 21                    | 0.005815456 |
| GO:0006164                  | purine nucleotide biosynthetic process                                                       | 1                                          | 21                    | 0.006012798 |
| GO:0030126                  | COPI vesicle coat                                                                            | 1                                          | 21                    | 0.006012798 |
| GO:0000502                  | proteasome complex                                                                           | 1                                          | 21                    | 0.006012798 |
| GO:0003841                  | 1-acylglycerol-3-phosphate O-acyltransferase activity                                        | 1                                          | 21                    | 0.007008202 |
| GO:0043295                  | glutathione binding                                                                          | 1                                          | 21                    | 0.007008202 |
| GO:0009536                  | plastid                                                                                      | 2                                          | 21                    | 0.007203187 |
| GO:0005773                  | vacuole                                                                                      | 3                                          | 21                    | 0.008625029 |
| GO:0004602                  | glutathione peroxidase activity                                                              | 1                                          | 21                    | 0.008993265 |
| GO:0045087                  | innate immune response                                                                       | 1                                          | 21                    | 0.013922536 |
| GO:0009409                  | response to cold                                                                             | 2                                          | 21                    | 0.014317136 |
| GO:0006626                  | protein targeting to mitochondrion                                                           | 1                                          | 21                    | 0.015880945 |
| GO:0005741                  | mitochondrial outer membrane                                                                 | 1                                          | 21                    | 0.01685731  |
| GO:0006888                  | ER to Golgi vesicle-mediated transport                                                       | 1                                          | 21                    | 0.017831785 |
| GO:0030163                  | protein catabolic process                                                                    | 1                                          | 21                    | 0.021710843 |
| GO:0046686                  | response to cadmium ion                                                                      | 2                                          | 21                    | 0.028863784 |
| GO:0009706                  | chloroplast inner membrane                                                                   | 1                                          | 21                    | 0.03032919  |
| GO:0016020                  | membrane                                                                                     | 4                                          | 21                    | 0.032593145 |
| GO:0003924                  | GTPase activity                                                                              | 1                                          | 21                    | 0.033168516 |
| GO:0015934                  | large ribosomal subunit                                                                      | 1                                          | 21                    | 0.033168516 |
| GO:0005618                  | cell wall                                                                                    | 2                                          | 21                    | 0.033515255 |
| GO:0045271                  | respiratory chain complex I                                                                  | 1                                          | 21                    | 0.035991229 |
| GO:0009407                  | toxin catabolic process                                                                      | 1                                          | 21                    | 0.039729122 |
| GO:0004364                  | glutathione transferase activity                                                             | 1                                          | 21                    | 0.042513337 |
| GO:0009570                  | chloroplast stroma                                                                           | 2                                          | 21                    | 0.04365762  |
| GO:0003755                  | peptidyl-prolyl cis-trans isomerase activity                                                 | 1                                          | 21                    | 0.051676093 |
| GO:0008565                  | protein transporter activity                                                                 | 1                                          | 21                    | 0.066841995 |
| GO:0005743                  | mitochondrial inner membrane                                                                 | 1                                          | 21                    | 0.070336337 |
| GO:0042254                  | ribosome biogenesis                                                                          | 1                                          | 21                    | 0.085717768 |
| GO:0008152                  | metabolic process                                                                            | 2                                          | 21                    | 0.089787188 |
| GO:0005507                  | copper ion binding                                                                           | 1                                          | 21                    | 0.096483036 |



| Cluster 13<br>GO identifier<br>(con.) | Description                   | #<br>Associated<br>to the GO<br>in Cluster | Total # in<br>Cluster | p-value     |
|---------------------------------------|-------------------------------|--------------------------------------------|-----------------------|-------------|
| GO:0005777                            | peroxisome                    | 1                                          | 21                    | 0.100548078 |
| GO:0005794                            | Golgi apparatus               | 1                                          | 21                    | 0.11406079  |
| GO:0042742                            | defense response to bacterium | 1                                          | 21                    | 0.118717657 |
| GO:0005516                            | calmodulin binding            | 1                                          | 21                    | 0.130854656 |
| GO:0009579                            | thylakoid                     | 1                                          | 21                    | 0.145461745 |
| GO:0005829                            | cytosol                       | 1                                          | 21                    | 0.146888592 |
| GO:0005840                            | ribosome                      | 1                                          | 21                    | 0.155322448 |
| GO:0006457                            | protein folding               | 1                                          | 21                    | 0.168901963 |
| GO:0005215                            | transporter activity          | 1                                          | 21                    | 0.181899925 |
| GO:0007165                            | signal transduction           | 1                                          | 21                    | 0.185688384 |
| GO:0048046                            | apoplast                      | 1                                          | 21                    | 0.192503263 |
| GO:0003723                            | RNA binding                   | 1                                          | 21                    | 0.223588428 |
| GO:0006952                            | defense response              | 1                                          | 21                    | 0.2397356   |
| GO:0009941                            | chloroplast envelope          | 1                                          | 21                    | 0.260658257 |
| GO:0005737                            | cytoplasm                     | 1                                          | 21                    | 0.283333597 |
| GO:0005524                            | ATP binding                   | 1                                          | 21                    | 0.34268671  |

### Cluster 13

| <u>GO Identifier</u> | <u>#Loci</u> | <u>Associated Loci (Left to Right)</u> |           |           |           |           |           |
|----------------------|--------------|----------------------------------------|-----------|-----------|-----------|-----------|-----------|
| GO:0000502           | 1            | AT5G42790                              |           |           |           |           |           |
| GO:0003723           | 1            | AT4G39260                              |           |           |           |           |           |
| GO:0003735           | 5            | AT1G15930                              | AT3G03600 | AT3G49910 | AT4G27090 | AT5G15200 |           |
| GO:0003755           | 1            | AT2G16600                              |           |           |           |           |           |
| GO:0003841           | 1            | AT3G57650                              |           |           |           |           |           |
| GO:0003924           | 1            | AT1G10290                              |           |           |           |           |           |
| GO:0004364           | 1            | AT2G30860                              |           |           |           |           |           |
| GO:0004602           | 1            | AT2G30860                              |           |           |           |           |           |
| GO:0004641           | 1            | AT3G55010                              |           |           |           |           |           |
| GO:0005215           | 1            | AT2G21390                              |           |           |           |           |           |
| GO:0005507           | 1            | AT2G30860                              |           |           |           |           |           |
| GO:0005516           | 1            | AT5G62390                              |           |           |           |           |           |
| GO:0005524           | 1            | AT3G55010                              |           |           |           |           |           |
| GO:0005618           | 2            | AT4G39260                              | AT5G15200 |           |           |           |           |
| GO:0005730           | 4            | AT3G49910                              | AT4G27090 | AT4G39260 | AT5G15200 |           |           |
| GO:0005737           | 1            | AT2G30860                              |           |           |           |           |           |
| GO:0005739           | 4            | AT2G19080                              | AT2G38550 | AT3G55010 | AT5G47890 |           |           |
| GO:0005741           | 1            | AT2G19080                              |           |           |           |           |           |
| GO:0005743           | 1            | AT2G19080                              |           |           |           |           |           |
| GO:0005763           | 1            | AT3G03600                              |           |           |           |           |           |
| GO:0005773           | 3            | AT2G30860                              | AT4G27090 | AT5G66140 |           |           |           |
| GO:0005777           | 1            | AT4G39260                              |           |           |           |           |           |
| GO:0005783           | 3            | AT3G57650                              | AT4G27090 | AT5G62390 |           |           |           |
| GO:0005794           | 1            | AT1G10290                              |           |           |           |           |           |
| GO:0005829           | 1            | AT2G16600                              |           |           |           |           |           |
| GO:0005839           | 3            | AT1G56450                              | AT5G42790 | AT5G66140 |           |           |           |
| GO:0005840           | 1            | AT4G27090                              |           |           |           |           |           |
| GO:0005886           | 10           | AT1G10290                              | AT1G30630 | AT2G16600 | AT2G30860 | AT3G49910 | AT4G27090 |
|                      |              | AT4G39260                              | AT5G15200 | AT5G42790 | AT5G62390 |           |           |
| GO:0006164           | 1            | AT3G55010                              |           |           |           |           |           |
| GO:0006412           | 5            | AT1G15930                              | AT3G03600 | AT3G49910 | AT4G27090 | AT5G15200 |           |
| GO:0006457           | 1            | AT2G16600                              |           |           |           |           |           |
| GO:0006511           | 3            | AT1G56450                              | AT5G42790 | AT5G66140 |           |           |           |
| GO:0006626           | 1            | AT2G19080                              |           |           |           |           |           |
| GO:0006888           | 1            | AT2G21390                              |           |           |           |           |           |

**Cluster 13 (con.)**

| <b>GO Identifier</b> | <b>#Loci</b> | <b>Associated Loci (Left to Right)</b> |           |           |           |           |           |  |
|----------------------|--------------|----------------------------------------|-----------|-----------|-----------|-----------|-----------|--|
| GO:0006890           | 1            | AT1G30630                              |           |           |           |           |           |  |
| GO:0006896           | 1            | AT1G10290                              |           |           |           |           |           |  |
| GO:0006952           | 1            | AT2G30860                              |           |           |           |           |           |  |
| GO:0007165           | 1            | AT2G16600                              |           |           |           |           |           |  |
| GO:0008152           | 2            | AT2G43090                              | AT3G57650 |           |           |           |           |  |
| GO:0008233           | 3            | AT1G56450                              | AT5G42790 | AT5G66140 |           |           |           |  |
| GO:0008565           | 1            | AT1G30630                              |           |           |           |           |           |  |
| GO:0009407           | 1            | AT2G30860                              |           |           |           |           |           |  |
| GO:0009409           | 2            | AT3G49910                              | AT4G39260 |           |           |           |           |  |
| GO:0009507           | 10           | AT2G16600                              | AT2G30860 | AT2G38550 | AT2G43090 | AT3G49910 | AT3G55010 |  |
|                      |              | AT4G27090                              | AT4G39260 | AT5G15200 | AT5G66140 |           |           |  |
| GO:0009536           | 2            | AT2G19080                              | AT2G38550 |           |           |           |           |  |
| GO:0009570           | 2            | AT2G30860                              | AT2G43090 |           |           |           |           |  |
| GO:0009579           | 1            | AT2G30860                              |           |           |           |           |           |  |
| GO:0009651           | 4            | AT1G15930                              | AT1G56450 | AT2G43090 | AT4G39260 |           |           |  |
| GO:0009706           | 1            | AT2G38550                              |           |           |           |           |           |  |
| GO:0009941           | 1            | AT2G38550                              |           |           |           |           |           |  |
| GO:0015934           | 1            | AT3G49910                              |           |           |           |           |           |  |
| GO:0016020           | 4            | AT1G10290                              | AT2G21390 | AT3G49910 | AT5G15200 |           |           |  |
| GO:0016655           | 1            | AT5G47890                              |           |           |           |           |           |  |
| GO:0016836           | 1            | AT2G43090                              |           |           |           |           |           |  |
| GO:0019773           | 1            | AT5G66140                              |           |           |           |           |           |  |
| GO:0022625           | 2            | AT3G49910                              | AT4G27090 |           |           |           |           |  |
| GO:0022626           | 5            | AT1G15930                              | AT1G56450 | AT3G49910 | AT4G27090 | AT5G15200 |           |  |
| GO:0022627           | 2            | AT1G15930                              | AT5G15200 |           |           |           |           |  |
| GO:0030126           | 1            | AT2G21390                              |           |           |           |           |           |  |
| GO:0030163           | 1            | AT5G42790                              |           |           |           |           |           |  |
| GO:0042254           | 1            | AT4G27090                              |           |           |           |           |           |  |
| GO:0042742           | 1            | AT2G30860                              |           |           |           |           |           |  |
| GO:0043295           | 1            | AT2G30860                              |           |           |           |           |           |  |
| GO:0045087           | 1            | AT4G39260                              |           |           |           |           |           |  |
| GO:0045271           | 1            | AT5G47890                              |           |           |           |           |           |  |
| GO:0046686           | 2            | AT1G15930                              | AT1G56450 |           |           |           |           |  |
| GO:0048046           | 1            | AT2G30860                              |           |           |           |           |           |  |

**Cluster 14**

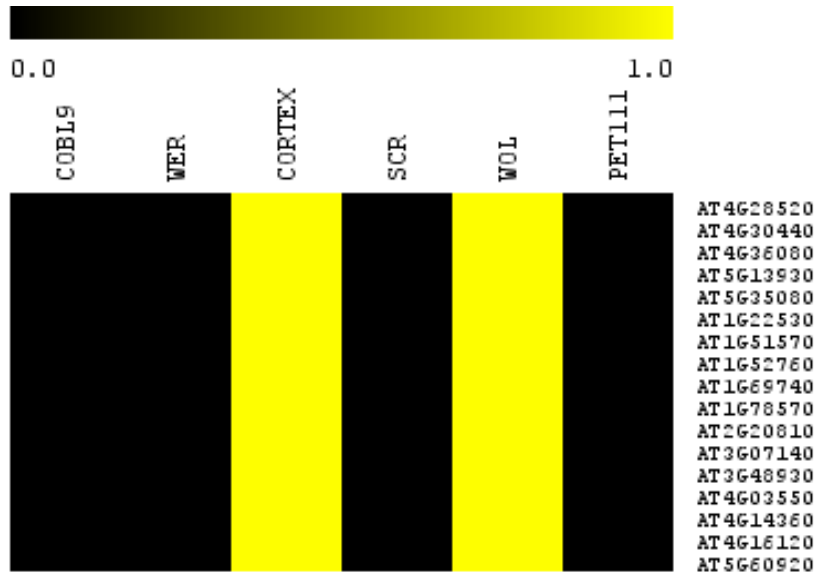

**Cluster 14**

AT1G22530  
 AT1G51570  
 AT1G52760  
 AT1G69740  
 AT1G78570  
 AT2G20810  
 AT3G07140  
 AT3G48930  
 AT4G03550  
 AT4G14360  
 AT4G16120  
 AT4G28520  
 AT4G30440  
 AT4G36080  
 AT5G13930  
 AT5G35080  
 AT5G60920

| Cluster 14<br>GO identifier | Description                                                   | #<br>Associated<br>to the GO<br>in Cluster | Total # in<br>Cluster | p-value     |
|-----------------------------|---------------------------------------------------------------|--------------------------------------------|-----------------------|-------------|
| GO:0009225                  | nucleotide-sugar metabolic process                            | 2                                          | 17                    | 9.46E-05    |
| GO:0009715                  | chalcone biosynthetic process                                 | 1                                          | 17                    | 8.15E-04    |
| GO:0009930                  | longitudinal side of cell surface                             | 1                                          | 17                    | 8.15E-04    |
| GO:0016210                  | naringenin-chalcone synthase activity                         | 1                                          | 17                    | 8.15E-04    |
| GO:0042735                  | protein body                                                  | 1                                          | 17                    | 8.15E-04    |
| GO:0046658                  | anchored to plasma membrane                                   | 2                                          | 17                    | 0.001061677 |
| GO:0005783                  | endoplasmic reticulum                                         | 3                                          | 17                    | 0.001155695 |
| GO:0004655                  | porphobilinogen synthase activity                             | 1                                          | 17                    | 0.001629054 |
| GO:0009629                  | response to gravity                                           | 1                                          | 17                    | 0.001629054 |
| GO:0010315                  | auxin efflux                                                  | 1                                          | 17                    | 0.001629054 |
| GO:0050377                  | UDP-glucose 4,6-dehydratase activity                          | 1                                          | 17                    | 0.001629054 |
| GO:0003923                  | GPI-anchor transamidase activity                              | 1                                          | 17                    | 0.002441706 |
| GO:0009897                  | external side of plasma membrane                              | 1                                          | 17                    | 0.002441706 |
| GO:0010280                  | UDP-L-rhamnose synthase activity                              | 1                                          | 17                    | 0.002441706 |
| GO:0003824                  | catalytic activity                                            | 3                                          | 17                    | 0.002937773 |
| GO:0010215                  | cellulose microfibril organization                            | 1                                          | 17                    | 0.003253109 |
| GO:0010253                  | UDP-rhamnose biosynthetic process                             | 1                                          | 17                    | 0.003253109 |
| GO:0052542                  | callose deposition during defense response                    | 1                                          | 17                    | 0.003253109 |
| GO:0005625                  | soluble fraction                                              | 1                                          | 17                    | 0.004063266 |
| GO:0050378                  | UDP-glucuronate 4-epimerase activity                          | 1                                          | 17                    | 0.004063266 |
| GO:0005794                  | Golgi apparatus                                               | 2                                          | 17                    | 0.004641499 |
| GO:0051555                  | flavonol biosynthetic process                                 | 1                                          | 17                    | 0.004872178 |
| GO:0031540                  | regulation of anthocyanin biosynthetic process                | 1                                          | 17                    | 0.005679845 |
| GO:0000148                  | 1,3-beta-glucan synthase complex                              | 1                                          | 17                    | 0.009699568 |
| GO:0003843                  | 1,3-beta-glucan synthase activity                             | 1                                          | 17                    | 0.009699568 |
| GO:0006075                  | 1,3-beta-glucan biosynthetic process                          | 1                                          | 17                    | 0.009699568 |
| GO:0009863                  | salicylic acid mediated signaling pathway                     | 1                                          | 17                    | 0.010499799 |
| GO:0009870                  | defense response signaling pathway, resistance gene-dependent | 1                                          | 17                    | 0.010499799 |
| GO:0031225                  | anchored to membrane                                          | 2                                          | 17                    | 0.011292096 |
| GO:0006779                  | porphyrin biosynthetic process                                | 1                                          | 17                    | 0.011298796 |
| GO:0009825                  | multidimensional cell growth                                  | 1                                          | 17                    | 0.012096559 |

| Cluster 14<br>GO identifier<br>(con.) | Description                                                  | #<br>Associated<br>to the GO<br>in Cluster | Total # in<br>Cluster | p-value     |
|---------------------------------------|--------------------------------------------------------------|--------------------------------------------|-----------------------|-------------|
| GO:0052544                            | callose deposition in cell wall during defense response      | 1                                          | 17                    | 0.01289309  |
| GO:0000162                            | tryptophan biosynthetic process                              | 1                                          | 17                    | 0.015275303 |
| GO:0047262                            | polygalacturonate 4-alpha-galacturonosyltransferase activity | 1                                          | 17                    | 0.019221143 |
| GO:0009793                            | embryonic development ending in seed dormancy                | 2                                          | 17                    | 0.019844722 |
| GO:0009813                            | flavonoid biosynthetic process                               | 1                                          | 17                    | 0.020790929 |
| GO:0016757                            | transferase activity, transferring glycosyl groups           | 2                                          | 17                    | 0.022199382 |
| GO:0009620                            | response to fungus                                           | 1                                          | 17                    | 0.022355845 |
| GO:0005618                            | cell wall                                                    | 2                                          | 17                    | 0.023005946 |
| GO:0010224                            | response to UV-B                                             | 1                                          | 17                    | 0.025471109 |
| GO:0009926                            | auxin polar transport                                        | 1                                          | 17                    | 0.028567021 |
| GO:0009965                            | leaf morphogenesis                                           | 1                                          | 17                    | 0.029337985 |
| GO:0009705                            | plant-type vacuole membrane                                  | 1                                          | 17                    | 0.030107746 |
| GO:0016051                            | carbohydrate biosynthetic process                            | 1                                          | 17                    | 0.036981675 |
| GO:0045735                            | nutrient reservoir activity                                  | 1                                          | 17                    | 0.040758814 |
| GO:0016758                            | transferase activity, transferring hexosyl groups            | 1                                          | 17                    | 0.045252339 |
| GO:0022627                            | cytosolic small ribosomal subunit                            | 1                                          | 17                    | 0.061368544 |
| GO:0009611                            | response to wounding                                         | 1                                          | 17                    | 0.08038956  |
| GO:0009753                            | response to jasmonic acid stimulus                           | 1                                          | 17                    | 0.084505279 |
| GO:0042742                            | defense response to bacterium                                | 1                                          | 17                    | 0.09859819  |
| GO:0005886                            | plasma membrane                                              | 3                                          | 17                    | 0.108412229 |
| GO:0022626                            | cytosolic ribosome                                           | 1                                          | 17                    | 0.1197847   |
| GO:0006979                            | response to oxidative stress                                 | 1                                          | 17                    | 0.135076857 |
| GO:0009737                            | response to abscisic acid stimulus                           | 1                                          | 17                    | 0.142777205 |
| GO:0005215                            | transporter activity                                         | 1                                          | 17                    | 0.15372846  |
| GO:0009505                            | plant-type cell wall                                         | 1                                          | 17                    | 0.16157143  |
| GO:0003735                            | structural constituent of ribosome                           | 1                                          | 17                    | 0.186028391 |
| GO:0009651                            | response to salt stress                                      | 1                                          | 17                    | 0.188568416 |
| GO:0006412                            | translation                                                  | 1                                          | 17                    | 0.192086321 |
| GO:0006810                            | transport                                                    | 1                                          | 17                    | 0.203336094 |
| GO:0006499                            | N-terminal protein myristoylation                            | 1                                          | 17                    | 0.216405877 |
| GO:0009570                            | chloroplast stroma                                           | 1                                          | 17                    | 0.219568361 |
| GO:0009507                            | chloroplast                                                  | 2                                          | 17                    | 0.287354079 |
| GO:0005739                            | mitochondrion                                                | 1                                          | 17                    | 0.343822974 |
| GO:0005515                            | protein binding                                              | 1                                          | 17                    | 0.379145853 |

#### Cluster 14

| GO Identifier | #Loci | Associated Loci (Left to Right) |
|---------------|-------|---------------------------------|
| GO:0000148    | 1     | AT4G03550                       |
| GO:0000162    | 1     | AT1G51570                       |
| GO:0003735    | 1     | AT3G48930                       |
| GO:0003824    | 3     | AT1G52760 AT1G78570 AT4G30440   |
| GO:0003843    | 1     | AT4G03550                       |
| GO:0003923    | 1     | AT3G07140                       |
| GO:0004655    | 1     | AT1G69740                       |
| GO:0005215    | 1     | AT1G22530                       |
| GO:0005515    | 1     | AT5G35080                       |
| GO:0005618    | 2     | AT1G51570 AT3G48930             |
| GO:0005625    | 1     | AT1G78570                       |
| GO:0005739    | 1     | AT2G20810                       |
| GO:0005783    | 3     | AT1G51570 AT3G07140 AT5G13930   |
| GO:0005794    | 2     | AT4G14360 AT4G16120             |
| GO:0005886    | 3     | AT1G22530 AT4G03550 AT5G60920   |
| GO:0006075    | 1     | AT4G03550                       |

**Cluster 14 (con.)**

| <b>GO Identifier</b> | <b>#Loci</b> | <b>Associated Loci (Left to Right)</b> |           |
|----------------------|--------------|----------------------------------------|-----------|
| GO:0006412           | 1            | AT3G48930                              |           |
| GO:0006499           | 1            | AT4G14360                              |           |
| GO:0006779           | 1            | AT1G69740                              |           |
| GO:0006810           | 1            | AT1G22530                              |           |
| GO:0006979           | 1            | AT5G13930                              |           |
| GO:0009225           | 2            | AT1G78570                              | AT4G30440 |
| GO:0009505           | 1            | AT5G60920                              |           |
| GO:0009507           | 2            | AT1G22530                              | AT1G69740 |
| GO:0009570           | 1            | AT1G69740                              |           |
| GO:0009611           | 1            | AT5G13930                              |           |
| GO:0009620           | 1            | AT4G03550                              |           |
| GO:0009629           | 1            | AT5G13930                              |           |
| GO:0009651           | 1            | AT5G60920                              |           |
| GO:0009705           | 1            | AT5G13930                              |           |
| GO:0009715           | 1            | AT5G13930                              |           |
| GO:0009737           | 1            | AT4G28520                              |           |
| GO:0009753           | 1            | AT5G13930                              |           |
| GO:0009793           | 2            | AT3G48930                              | AT4G28520 |
| GO:0009813           | 1            | AT5G13930                              |           |
| GO:0009825           | 1            | AT5G60920                              |           |
| GO:0009863           | 1            | AT4G03550                              |           |
| GO:0009870           | 1            | AT4G03550                              |           |
| GO:0009897           | 1            | AT5G60920                              |           |
| GO:0009926           | 1            | AT5G13930                              |           |
| GO:0009930           | 1            | AT5G60920                              |           |
| GO:0009965           | 1            | AT4G03550                              |           |
| GO:0010215           | 1            | AT5G60920                              |           |
| GO:0010224           | 1            | AT5G13930                              |           |
| GO:0010253           | 1            | AT1G78570                              |           |
| GO:0010280           | 1            | AT1G78570                              |           |
| GO:0010315           | 1            | AT1G78570                              |           |
| GO:0016051           | 1            | AT2G20810                              |           |
| GO:0016210           | 1            | AT5G13930                              |           |
| GO:0016757           | 2            | AT2G20810                              | AT4G03550 |
| GO:0016758           | 1            | AT2G20810                              |           |
| GO:0022626           | 1            | AT3G48930                              |           |
| GO:0022627           | 1            | AT3G48930                              |           |
| GO:0031225           | 2            | AT4G16120                              | AT5G60920 |
| GO:0031540           | 1            | AT5G13930                              |           |
| GO:0042735           | 1            | AT4G28520                              |           |
| GO:0042742           | 1            | AT4G03550                              |           |
| GO:0045735           | 1            | AT4G28520                              |           |
| GO:0046658           | 2            | AT4G16120                              | AT5G60920 |
| GO:0047262           | 1            | AT2G20810                              |           |
| GO:0050377           | 1            | AT1G78570                              |           |
| GO:0050378           | 1            | AT4G30440                              |           |
| GO:0051555           | 1            | AT1G78570                              |           |
| GO:0052542           | 1            | AT4G03550                              |           |
| GO:0052544           | 1            | AT4G03550                              |           |

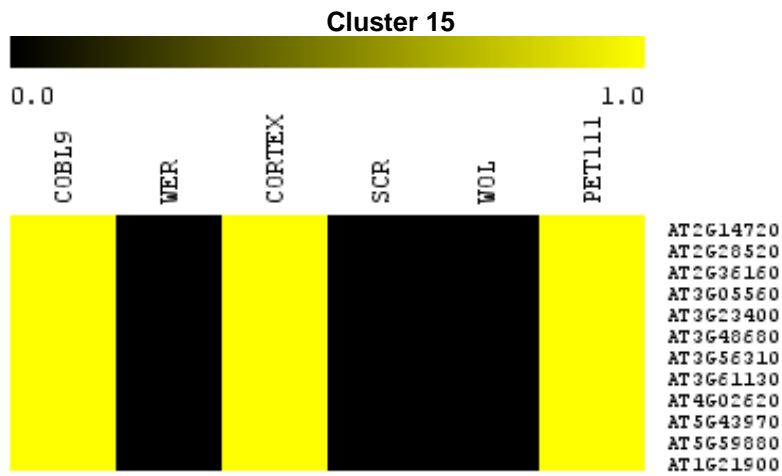

**Cluster 15**

AT1G21900  
 AT2G14720  
 AT2G28520  
 AT2G36160  
 AT3G05560  
 AT3G23400  
 AT3G48680  
 AT3G56310  
 AT3G61130  
 AT4G02620  
 AT5G43970  
 AT5G59880

| Cluster 15<br>GO identifier | Description                                      | #<br>Associated<br>to the GO<br>in Cluster | Total # in<br>Cluster | p-value     |
|-----------------------------|--------------------------------------------------|--------------------------------------------|-----------------------|-------------|
| GO:0003735                  | structural constituent of ribosome               | 2                                          | 12                    | 0.010644001 |
| GO:0005886                  | plasma membrane                                  | 7                                          | 12                    | 1.09E-05    |
| GO:0005773                  | vacuole                                          | 3                                          | 12                    | 0.001728795 |
| GO:0004557                  | alpha-galactosidase activity                     | 1                                          | 12                    | 0.002297966 |
| GO:0005742                  | mitochondrial outer membrane translocase complex | 1                                          | 12                    | 0.004015079 |
| GO:0005739                  | mitochondrion                                    | 3                                          | 12                    | 0.007845499 |
| GO:0005198                  | structural molecule activity                     | 1                                          | 12                    | 0.023098336 |
| GO:0003779                  | actin binding                                    | 1                                          | 12                    | 0.028580558 |
| GO:0005794                  | Golgi apparatus                                  | 1                                          | 12                    | 0.068863939 |
| GO:0005840                  | ribosome                                         | 1                                          | 12                    | 0.096088636 |
| GO:0005730                  | nucleolus                                        | 1                                          | 12                    | 0.120762461 |
| GO:0005622                  | intracellular                                    | 1                                          | 12                    | 0.182044909 |
| GO:0005634                  | nucleus                                          | 1                                          | 12                    | 0.384040506 |

**Cluster 15**

| <u>GO Identifier</u> | <u>#Loci</u> | <u>Associated Loci (Left to Right)</u> |
|----------------------|--------------|----------------------------------------|
| GO:0003735           | 2            | AT2G36160 AT3G05560                    |
| GO:0003779           | 1            | AT5G59880                              |
| GO:0004557           | 1            | AT3G56310                              |
| GO:0005198           | 1            | AT3G23400                              |
| GO:0005622           | 1            | AT5G59880                              |
| GO:0005634           | 1            | AT3G23400                              |
| GO:0005730           | 1            | AT3G05560                              |

**Cluster 15 (con.)**

| <u>GO Identifier</u> | <u>#Loci</u> | <u>Associated Loci (Left to Right)</u> |           |           |           |           |
|----------------------|--------------|----------------------------------------|-----------|-----------|-----------|-----------|
| GO:0005739           | 3            | AT3G48680                              | AT5G43970 | AT5G59880 |           |           |
| GO:0005742           | 1            | AT5G43970                              |           |           |           |           |
| GO:0005773           | 3            | AT2G28520                              | AT3G56310 | AT4G02620 |           |           |
| GO:0005794           | 1            | AT3G61130                              |           |           |           |           |
| GO:0005840           | 1            | AT3G05560                              |           |           |           |           |
| GO:0005886           | 7            | AT2G36160                              | AT3G05560 | AT3G23400 | AT3G48680 | AT4G02620 |
|                      |              | AT5G43970                              | AT5G59880 |           |           |           |
| GO:0005975           | 1            | AT3G56310                              |           |           |           |           |
| GO:0005990           | 1            | AT3G56310                              |           |           |           |           |
| GO:0006412           | 2            | AT2G36160                              | AT3G05560 |           |           |           |
| GO:0006626           | 1            | AT5G43970                              |           |           |           |           |
| GO:0006810           | 1            | AT3G23400                              |           |           |           |           |
| GO:0006886           | 1            | AT1G21900                              |           |           |           |           |
| GO:0006979           | 1            | AT5G59880                              |           |           |           |           |
| GO:0008152           | 1            | AT3G56310                              |           |           |           |           |
| GO:0008320           | 1            | AT1G21900                              |           |           |           |           |
| GO:0008415           | 1            | AT3G48680                              |           |           |           |           |
| GO:0009507           | 4            | AT2G36160                              | AT3G23400 | AT3G48680 | AT5G59880 |           |
| GO:0009535           | 1            | AT3G23400                              |           |           |           |           |
| GO:0009536           | 1            | AT5G43970                              |           |           |           |           |
| GO:0009579           | 1            | AT3G23400                              |           |           |           |           |
| GO:0009853           | 1            | AT3G48680                              |           |           |           |           |
| GO:0010287           | 1            | AT3G23400                              |           |           |           |           |
| GO:0010289           | 1            | AT3G61130                              |           |           |           |           |
| GO:0012510           | 1            | AT2G28520                              |           |           |           |           |
| GO:0015450           | 1            | AT5G43970                              |           |           |           |           |
| GO:0015986           | 1            | AT4G02620                              |           |           |           |           |
| GO:0016020           | 3            | AT1G21900                              | AT2G36160 | AT3G23400 |           |           |
| GO:0016051           | 1            | AT3G61130                              |           |           |           |           |
| GO:0016740           | 1            | AT3G48680                              |           |           |           |           |
| GO:0016757           | 1            | AT3G61130                              |           |           |           |           |
| GO:0016887           | 1            | AT2G28520                              |           |           |           |           |
| GO:0022625           | 1            | AT3G05560                              |           |           |           |           |
| GO:0022626           | 2            | AT2G36160                              | AT3G05560 |           |           |           |
| GO:0022627           | 1            | AT2G36160                              |           |           |           |           |
| GO:0031966           | 1            | AT3G48680                              |           |           |           |           |
| GO:0031977           | 1            | AT3G23400                              |           |           |           |           |
| GO:0045271           | 1            | AT3G48680                              |           |           |           |           |
| GO:0046686           | 1            | AT5G59880                              |           |           |           |           |
| GO:0046933           | 1            | AT4G02620                              |           |           |           |           |

**Cluster 16**

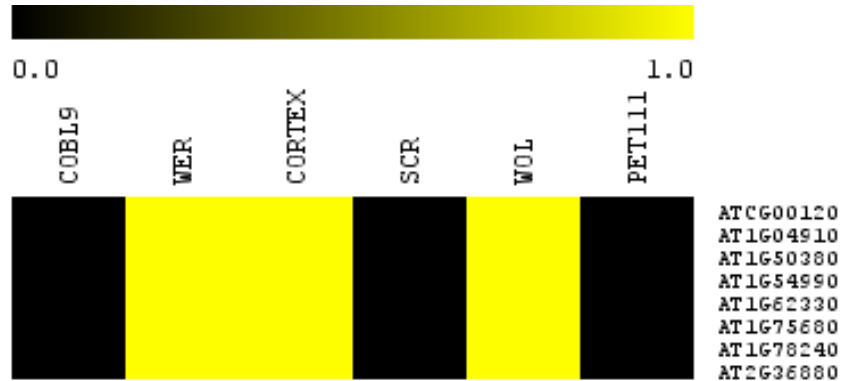

**Cluster 16**

AT1G04910  
 AT1G50380  
 AT1G54990  
 AT1G62330  
 AT1G75680  
 AT1G78240  
 AT2G36880  
 ATCG00120

| Cluster 16<br>GO identifier | Description                                          | #<br>Associated<br>to the GO<br>in Cluster | Total # in<br>Cluster | p-value     |
|-----------------------------|------------------------------------------------------|--------------------------------------------|-----------------------|-------------|
| GO:0005794                  | Golgi apparatus                                      | 2                                          | 7                     | 7.62E-04    |
| GO:0010289                  | homogalacturonan biosynthetic process                | 1                                          | 7                     | 0.001006373 |
| GO:0004478                  | methionine adenosyltransferase activity              | 1                                          | 7                     | 0.001341445 |
| GO:0006556                  | S-adenosylmethionine biosynthetic process            | 1                                          | 7                     | 0.001341445 |
| GO:0009612                  | response to mechanical stimulus                      | 1                                          | 7                     | 0.002679803 |
| GO:0008236                  | serine-type peptidase activity                       | 1                                          | 7                     | 0.010645374 |
| GO:0009926                  | auxin polar transport                                | 1                                          | 7                     | 0.011962248 |
| GO:0048367                  | shoot development                                    | 1                                          | 7                     | 0.012290989 |
| GO:0005886                  | plasma membrane                                      | 3                                          | 7                     | 0.01283583  |
| GO:0009735                  | response to cytokinin stimulus                       | 1                                          | 7                     | 0.014259436 |
| GO:0008168                  | methyltransferase activity                           | 1                                          | 7                     | 0.015241091 |
| GO:0048364                  | root development                                     | 1                                          | 7                     | 0.022387749 |
| GO:0005507                  | copper ion binding                                   | 1                                          | 7                     | 0.034517469 |
| GO:0004553                  | hydrolase activity, hydrolyzing O-glycosyl compounds | 1                                          | 7                     | 0.050987635 |
| GO:0009733                  | response to auxin stimulus                           | 1                                          | 7                     | 0.069899735 |
| GO:0005783                  | endoplasmic reticulum                                | 1                                          | 7                     | 0.082400828 |
| GO:0005975                  | carbohydrate metabolic process                       | 1                                          | 7                     | 0.091774451 |
| GO:0006508                  | proteolysis                                          | 1                                          | 7                     | 0.102609263 |
| GO:0003674                  | molecular_function                                   | 3                                          | 7                     | 0.178292796 |
| GO:0005739                  | mitochondrion                                        | 1                                          | 7                     | 0.206075695 |
| GO:0005575                  | cellular_component                                   | 2                                          | 7                     | 0.311759034 |

**Cluster 16**

| <b>GO Identifier</b> | <b>#Loci</b> | <b>Associated Loci (Left to Right)</b> |           |           |
|----------------------|--------------|----------------------------------------|-----------|-----------|
| GO:0003674           | 3            | AT1G04910                              | AT1G54990 | AT1G62330 |
| GO:0004478           | 1            | AT2G36880                              |           |           |
| GO:0004553           | 1            | AT1G75680                              |           |           |
| GO:0005507           | 1            | AT2G36880                              |           |           |
| GO:0005575           | 2            | AT1G50380                              | AT1G62330 |           |
| GO:0005739           | 1            | AT1G54990                              |           |           |
| GO:0005783           | 1            | AT1G54990                              |           |           |
| GO:0005794           | 2            | AT1G04910                              | AT1G78240 |           |
| GO:0005886           | 3            | AT1G54990                              | AT1G75680 | AT2G36880 |
| GO:0005975           | 1            | AT1G75680                              |           |           |
| GO:0006508           | 1            | AT1G50380                              |           |           |
| GO:0006556           | 1            | AT2G36880                              |           |           |
| GO:0008168           | 1            | AT1G78240                              |           |           |
| GO:0008236           | 1            | AT1G50380                              |           |           |
| GO:0009612           | 1            | AT1G54990                              |           |           |
| GO:0009733           | 1            | AT1G54990                              |           |           |
| GO:0009735           | 1            | AT1G78240                              |           |           |
| GO:0009926           | 1            | AT1G54990                              |           |           |
| GO:0010289           | 1            | AT1G78240                              |           |           |
| GO:0048364           | 1            | AT1G78240                              |           |           |



**Cluster 16 (con.)**

**GO Identifier #Loci Associated Loci (Left to Right)**

GO:0048367 1 AT1G78240

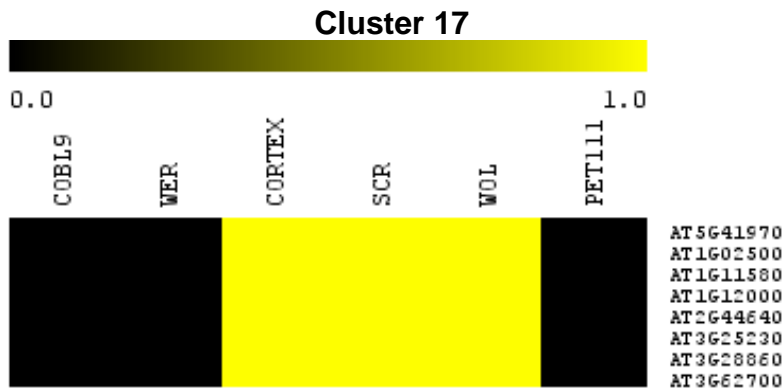

**Cluster 17**

- AT1G02500
- AT1G11580
- AT1G12000
- AT2G44640
- AT3G25230
- AT3G28860
- AT3G62700
- AT5G41970

| Cluster 17<br>GO identifier | Description                                                               | #<br>Associated<br>to the GO<br>in Cluster | Total # in<br>Cluster | p-value     |
|-----------------------------|---------------------------------------------------------------------------|--------------------------------------------|-----------------------|-------------|
| GO:0046686                  | response to cadmium ion                                                   | 3                                          | 8                     | 1.23E-04    |
| GO:0005886                  | plasma membrane                                                           | 5                                          | 8                     | 1.42E-04    |
| GO:0005618                  | cell wall                                                                 | 3                                          | 8                     | 1.58E-04    |
| GO:0042626                  | ATPase activity, coupled to transmembrane movement of substances          | 2                                          | 8                     | 4.70E-04    |
| GO:0010318                  | pyrophosphate-dependent phosphofructokinase complex, beta-subunit complex | 1                                          | 8                     | 7.67E-04    |
| GO:0010541                  | acropetal auxin transport                                                 | 1                                          | 8                     | 7.67E-04    |
| GO:0008361                  | regulation of cell size                                                   | 1                                          | 8                     | 0.001150031 |
| GO:0004478                  | methionine adenosyltransferase activity                                   | 1                                          | 8                     | 0.00153286  |
| GO:0006556                  | S-adenosylmethionine biosynthetic process                                 | 1                                          | 8                     | 0.00153286  |
| GO:0010329                  | auxin efflux transmembrane transporter activity                           | 1                                          | 8                     | 0.00153286  |
| GO:0043481                  | anthocyanin accumulation in tissues in response to UV light               | 1                                          | 8                     | 0.00153286  |
| GO:0047334                  | diphosphate-fructose-6-phosphate 1-phosphotransferase activity            | 1                                          | 8                     | 0.00153286  |
| GO:0010540                  | basipetal auxin transport                                                 | 1                                          | 8                     | 0.002297746 |
| GO:0009958                  | positive gravitropism                                                     | 1                                          | 8                     | 0.00458624  |
| GO:0009693                  | ethylene biosynthetic process                                             | 1                                          | 8                     | 0.00648627  |
| GO:0048443                  | stamen development                                                        | 1                                          | 8                     | 0.007244491 |
| GO:0005528                  | FK506 binding                                                             | 1                                          | 8                     | 0.008379906 |
| GO:0048527                  | lateral root development                                                  | 1                                          | 8                     | 0.008379906 |
| GO:0009637                  | response to blue light                                                    | 1                                          | 8                     | 0.009513024 |
| GO:0000325                  | plant-type vacuole                                                        | 1                                          | 8                     | 0.010643849 |
| GO:0009639                  | response to red or far red light                                          | 1                                          | 8                     | 0.011396459 |

| Cluster 17<br>GO identifier<br>(con.) | Description                                  | #<br>Associated<br>to the GO<br>in Cluster | Total # in<br>Cluster | p-value     |
|---------------------------------------|----------------------------------------------|--------------------------------------------|-----------------------|-------------|
| GO:0010218                            | response to far red light                    | 1                                          | 8                     | 0.012898628 |
| GO:0009926                            | auxin polar transport                        | 1                                          | 8                     | 0.013648189 |
| GO:0009640                            | photomorphogenesis                           | 1                                          | 8                     | 0.014022589 |
| GO:0005774                            | vacuolar membrane                            | 1                                          | 8                     | 0.015144268 |
| GO:0006096                            | glycolysis                                   | 1                                          | 8                     | 0.016263668 |
| GO:0003755                            | peptidyl-prolyl cis-trans isomerase activity | 1                                          | 8                     | 0.020348685 |
| GO:0042545                            | cell wall modification                       | 1                                          | 8                     | 0.022564031 |
| GO:0030599                            | pectinesterase activity                      | 1                                          | 8                     | 0.025503772 |
| GO:0048364                            | root development                             | 1                                          | 8                     | 0.025503772 |
| GO:0005739                            | mitochondrion                                | 2                                          | 8                     | 0.03036572  |
| GO:0009611                            | response to wounding                         | 1                                          | 8                     | 0.03960677  |
| GO:0009536                            | plastid                                      | 1                                          | 8                     | 0.047748157 |
| GO:0005516                            | calmodulin binding                           | 1                                          | 8                     | 0.054722882 |
| GO:0016020                            | membrane                                     | 2                                          | 8                     | 0.077133288 |
| GO:0009733                            | response to auxin stimulus                   | 1                                          | 8                     | 0.079038583 |
| GO:0009505                            | plant-type cell wall                         | 1                                          | 8                     | 0.084276101 |
| GO:0009651                            | response to salt stress                      | 1                                          | 8                     | 0.100576089 |
| GO:0006810                            | transport                                    | 1                                          | 8                     | 0.109887706 |
| GO:0009941                            | chloroplast envelope                         | 1                                          | 8                     | 0.125256373 |
| GO:0005773                            | vacuole                                      | 1                                          | 8                     | 0.146267346 |
| GO:0009507                            | chloroplast                                  | 1                                          | 8                     | 0.390264817 |

### Cluster 17

#### **GO Identifier #Loci Associated Loci (Left to Right)**

|            |   |           |           |           |           |           |
|------------|---|-----------|-----------|-----------|-----------|-----------|
| GO:0000325 | 1 | AT3G62700 |           |           |           |           |
| GO:0003755 | 1 | AT3G25230 |           |           |           |           |
| GO:0004478 | 1 | AT1G02500 |           |           |           |           |
| GO:0005516 | 1 | AT3G25230 |           |           |           |           |
| GO:0005528 | 1 | AT3G25230 |           |           |           |           |
| GO:0005618 | 3 | AT1G02500 | AT1G11580 | AT1G12000 |           |           |
| GO:0005739 | 2 | AT2G44640 | AT5G41970 |           |           |           |
| GO:0005773 | 1 | AT3G62700 |           |           |           |           |
| GO:0005774 | 1 | AT3G62700 |           |           |           |           |
| GO:0005886 | 5 | AT1G02500 | AT1G11580 | AT2G44640 | AT3G28860 | AT3G62700 |
| GO:0006096 | 1 | AT1G12000 |           |           |           |           |
| GO:0006556 | 1 | AT1G02500 |           |           |           |           |
| GO:0006810 | 1 | AT3G62700 |           |           |           |           |
| GO:0008361 | 1 | AT3G28860 |           |           |           |           |
| GO:0009505 | 1 | AT1G11580 |           |           |           |           |
| GO:0009507 | 1 | AT2G44640 |           |           |           |           |
| GO:0009536 | 1 | AT2G44640 |           |           |           |           |
| GO:0009611 | 1 | AT3G25230 |           |           |           |           |
| GO:0009637 | 1 | AT3G28860 |           |           |           |           |
| GO:0009639 | 1 | AT3G28860 |           |           |           |           |
| GO:0009640 | 1 | AT3G28860 |           |           |           |           |
| GO:0009651 | 1 | AT1G02500 |           |           |           |           |
| GO:0009693 | 1 | AT1G02500 |           |           |           |           |
| GO:0009733 | 1 | AT3G28860 |           |           |           |           |
| GO:0009926 | 1 | AT3G28860 |           |           |           |           |
| GO:0009941 | 1 | AT2G44640 |           |           |           |           |
| GO:0009958 | 1 | AT3G28860 |           |           |           |           |
| GO:0010218 | 1 | AT3G28860 |           |           |           |           |
| GO:0010318 | 1 | AT1G12000 |           |           |           |           |
| GO:0010329 | 1 | AT3G28860 |           |           |           |           |

**Cluster 17 (con.)**

| <b>GO Identifier</b> | <b>#Loci</b> | <b>Associated Loci (Left to Right)</b> |           |           |
|----------------------|--------------|----------------------------------------|-----------|-----------|
| GO:0010540           | 1            | AT3G28860                              |           |           |
| GO:0010541           | 1            | AT3G28860                              |           |           |
| GO:0016020           | 2            | AT1G02500                              | AT1G12000 |           |
| GO:0030599           | 1            | AT1G11580                              |           |           |
| GO:0042545           | 1            | AT1G11580                              |           |           |
| GO:0042626           | 2            | AT3G28860                              | AT3G62700 |           |
| GO:0043481           | 1            | AT3G28860                              |           |           |
| GO:0046686           | 3            | AT1G02500                              | AT1G12000 | AT3G25230 |
| GO:0047334           | 1            | AT1G12000                              |           |           |
| GO:0048364           | 1            | AT3G28860                              |           |           |
| GO:0048443           | 1            | AT3G28860                              |           |           |
| GO:0048527           | 1            | AT3G28860                              |           |           |

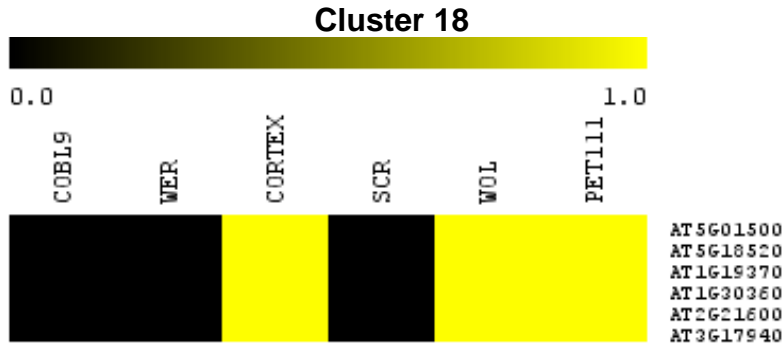

**Cluster 18**  
AT1G19370  
AT1G30360  
AT2G21600  
AT3G17940  
AT5G01500  
AT5G18520

| Cluster 18<br>GO identifier | Description                                        | #<br>Associated<br>to the GO<br>in Cluster | Total # in<br>Cluster | p-value     |
|-----------------------------|----------------------------------------------------|--------------------------------------------|-----------------------|-------------|
| GO:0004034                  | aldose 1-epimerase activity                        | 1                                          | 6                     | 0.003157127 |
| GO:0005347                  | ATP transmembrane transporter activity             | 1                                          | 6                     | 0.001149976 |
| GO:0005488                  | binding                                            | 1                                          | 6                     | 0.114504149 |
| GO:0009507                  | chloroplast                                        | 2                                          | 6                     | 0.117237127 |
| GO:0009941                  | chloroplast envelope                               | 2                                          | 6                     | 0.004385178 |
| GO:0005801                  | cis-Golgi network                                  | 1                                          | 6                     | 0.001437125 |
| GO:0012505                  | endomembrane system                                | 1                                          | 6                     | 0.36903943  |
| GO:0005783                  | endoplasmic reticulum                              | 2                                          | 6                     | 0.00229346  |
| GO:0006012                  | galactose metabolic process                        | 1                                          | 6                     | 0.003729361 |
| GO:0005794                  | Golgi apparatus                                    | 1                                          | 6                     | 0.035717836 |
| GO:0016021                  | integral to membrane                               | 1                                          | 6                     | 0.067986567 |
| GO:0016020                  | membrane                                           | 1                                          | 6                     | 0.275969005 |
| GO:0005743                  | mitochondrial inner membrane                       | 1                                          | 6                     | 0.021197393 |
| GO:0005739                  | mitochondrion                                      | 1                                          | 6                     | 0.183391785 |
| GO:0005886                  | plasma membrane                                    | 1                                          | 6                     | 0.316486099 |
| GO:0009536                  | plastid                                            | 1                                          | 6                     | 0.036258427 |
| GO:0009526                  | plastid envelope                                   | 1                                          | 6                     | 0.001149976 |
| GO:0006890                  | retrograde vesicle-mediated transport, Golgi to ER | 1                                          | 6                     | 0.001437125 |

| Cluster 18<br>GO identifier<br>(con.) | Description          | #<br>Associated<br>to the GO<br>in Cluster | Total # in<br>Cluster | p-value     |
|---------------------------------------|----------------------|--------------------------------------------|-----------------------|-------------|
| GO:0042651                            | thylakoid membrane   | 1                                          | 6                     | 0.002584344 |
| GO:0006810                            | transport            | 1                                          | 6                     | 0.084988653 |
| GO:0005215                            | transporter activity | 1                                          | 6                     | 0.061071892 |
| GO:0005773                            | vacuole              | 1                                          | 6                     | 0.114504149 |

### Cluster 18

#### GO Identifier #Loci Associated Loci (Left to Right)

|            |   |           |           |
|------------|---|-----------|-----------|
| GO:0004034 | 1 | AT3G17940 |           |
| GO:0005215 | 1 | AT5G01500 |           |
| GO:0005347 | 1 | AT5G01500 |           |
| GO:0005488 | 1 | AT5G01500 |           |
| GO:0005739 | 1 | AT5G01500 |           |
| GO:0005743 | 1 | AT5G01500 |           |
| GO:0005773 | 1 | AT1G30360 |           |
| GO:0005783 | 2 | AT1G19370 | AT2G21600 |
| GO:0005794 | 1 | AT2G21600 |           |
| GO:0005801 | 1 | AT2G21600 |           |
| GO:0005886 | 1 | AT1G30360 |           |
| GO:0006012 | 1 | AT3G17940 |           |
| GO:0006810 | 1 | AT5G01500 |           |
| GO:0006890 | 1 | AT2G21600 |           |
| GO:0009507 | 2 | AT1G30360 | AT5G01500 |
| GO:0009526 | 1 | AT5G01500 |           |
| GO:0009536 | 1 | AT5G01500 |           |
| GO:0009941 | 2 | AT1G30360 | AT5G01500 |
| GO:0012505 | 1 | AT5G18520 |           |
| GO:0016020 | 1 | AT1G30360 |           |
| GO:0016021 | 1 | AT5G18520 |           |
| GO:0042651 | 1 | AT5G01500 |           |

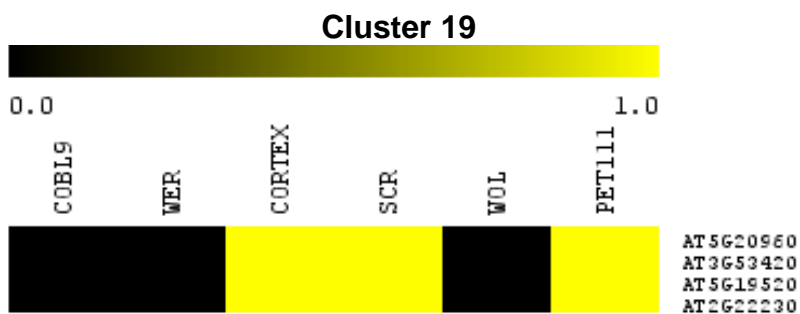

**Cluster19**  
AT2G22230  
AT3G53420  
AT5G19520  
AT5G20960

| Cluster 19<br>GO identifier | Description                                               | #<br>Associated<br>to the GO<br>in Cluster | Total # in<br>Cluster | p-value     |
|-----------------------------|-----------------------------------------------------------|--------------------------------------------|-----------------------|-------------|
| GO:0008381                  | mechanically-gated ion channel activity                   | 1                                          | 4                     | 3.84E-04    |
| GO:0019171                  | 3-hydroxyacyl-[acyl-carrier-protein] dehydratase activity | 1                                          | 4                     | 3.84E-04    |
| GO:0050302                  | indole-3-acetaldehyde oxidase activity                    | 1                                          | 4                     | 3.84E-04    |
| GO:0050982                  | detection of mechanical stimulus                          | 1                                          | 4                     | 3.84E-04    |
| GO:0004031                  | aldehyde oxidase activity                                 | 1                                          | 4                     | 5.75E-04    |
| GO:0006833                  | water transport                                           | 1                                          | 4                     | 7.67E-04    |
| GO:0009851                  | auxin biosynthetic process                                | 1                                          | 4                     | 0.00153286  |
| GO:0015250                  | water channel activity                                    | 1                                          | 4                     | 0.005349581 |
| GO:0006633                  | fatty acid biosynthetic process                           | 1                                          | 4                     | 0.0089551   |
| GO:0016020                  | membrane                                                  | 2                                          | 4                     | 0.021528308 |
| GO:0009414                  | response to water deprivation                             | 1                                          | 4                     | 0.025581533 |
| GO:0005886                  | plasma membrane                                           | 2                                          | 4                     | 0.032511279 |
| GO:0009651                  | response to salt stress                                   | 1                                          | 4                     | 0.053165286 |
| GO:0005618                  | cell wall                                                 | 1                                          | 4                     | 0.055627004 |
| GO:0006810                  | transport                                                 | 1                                          | 4                     | 0.058427724 |
| GO:0009507                  | chloroplast                                               | 2                                          | 4                     | 0.059481381 |
| GO:0005773                  | vacuole                                                   | 1                                          | 4                     | 0.079678425 |

### Cluster 19

#### GO Identifier #Loci Associated Loci (Left to Right)

|            |   |           |           |
|------------|---|-----------|-----------|
| GO:0004031 | 1 | AT5G20960 |           |
| GO:0005618 | 1 | AT2G22230 |           |
| GO:0005773 | 1 | AT3G53420 |           |
| GO:0005886 | 2 | AT3G53420 | AT5G19520 |
| GO:0006633 | 1 | AT2G22230 |           |
| GO:0006810 | 1 | AT3G53420 |           |
| GO:0006833 | 1 | AT3G53420 |           |
| GO:0008381 | 1 | AT5G19520 |           |
| GO:0009414 | 1 | AT3G53420 |           |
| GO:0009507 | 2 | AT2G22230 | AT3G53420 |
| GO:0009651 | 1 | AT3G53420 |           |
| GO:0009851 | 1 | AT5G20960 |           |
| GO:0015250 | 1 | AT3G53420 |           |
| GO:0016020 | 2 | AT3G53420 | AT5G19520 |
| GO:0019171 | 1 | AT2G22230 |           |
| GO:0050302 | 1 | AT5G20960 |           |
| GO:0050982 | 1 | AT5G19520 |           |

### Cluster 20

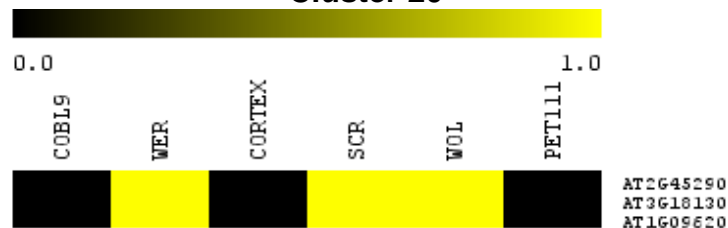

Cluster 20  
AT1G09620  
AT2G45290  
AT3G18130

| Cluster 20<br>GO identifier | Description                                 | #<br>Associated<br>to the GO<br>in Cluster | Total # in<br>Cluster | p-value     |
|-----------------------------|---------------------------------------------|--------------------------------------------|-----------------------|-------------|
| GO:0004802                  | transketolase activity                      | 1                                          | 3                     | 4.31E-04    |
| GO:0004812                  | aminoacyl-tRNA ligase activity              | 1                                          | 3                     | 0.003301582 |
| GO:0006418                  | tRNA aminoacylation for protein translation | 1                                          | 3                     | 0.003587987 |
| GO:0048367                  | shoot development                           | 1                                          | 3                     | 0.005304104 |
| GO:0005834                  | heterotrimeric G-protein complex            | 1                                          | 3                     | 0.007586096 |
| GO:0048364                  | root development                            | 1                                          | 3                     | 0.009719072 |
| GO:0000166                  | nucleotide binding                          | 1                                          | 3                     | 0.030710135 |
| GO:0005730                  | nucleolus                                   | 1                                          | 3                     | 0.033462623 |
| GO:0009507                  | chloroplast                                 | 2                                          | 3                     | 0.03349462  |
| GO:0046686                  | response to cadmium ion                     | 1                                          | 3                     | 0.038935069 |
| GO:0009570                  | chloroplast stroma                          | 1                                          | 3                     | 0.049213621 |
| GO:0005524                  | ATP binding                                 | 1                                          | 3                     | 0.084606448 |

### Cluster 20

| GO Identifier | #Loci | Associated Loci (Left to Right) |
|---------------|-------|---------------------------------|
| GO:0000166    | 1     | AT3G18130                       |
| GO:0004802    | 1     | AT2G45290                       |
| GO:0004812    | 1     | AT1G09620                       |
| GO:0005524    | 1     | AT1G09620                       |
| GO:0005730    | 1     | AT3G18130                       |
| GO:0005834    | 1     | AT3G18130                       |
| GO:0006418    | 1     | AT1G09620                       |
| GO:0009507    | 2     | AT1G09620 AT2G45290             |
| GO:0009570    | 1     | AT2G45290                       |
| GO:0046686    | 1     | AT2G45290                       |
| GO:0048364    | 1     | AT3G18130                       |
| GO:0048367    | 1     | AT3G18130                       |

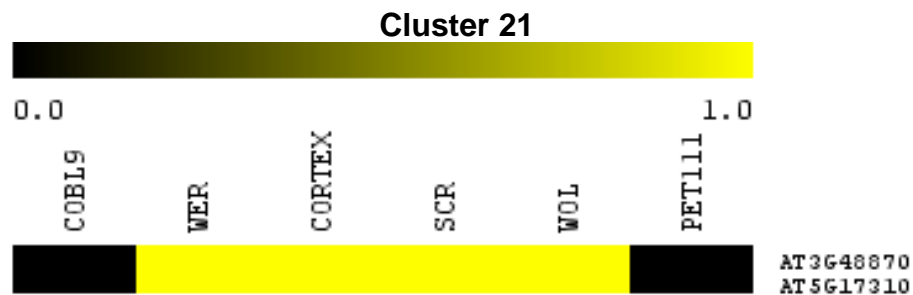

**Cluster 21**  
AT3G48870  
AT5G17310

| Cluster 21<br>GO identifier | Description                                          | #<br>Associated<br>to the GO<br>in Cluster | Total # in<br>Cluster | p-value     |
|-----------------------------|------------------------------------------------------|--------------------------------------------|-----------------------|-------------|
| GO:0003983                  | UTP:glucose-1-phosphate uridylyltransferase activity | 1                                          | 2                     | 2.88E-04    |
| GO:0046686                  | response to cadmium ion                              | 1                                          | 2                     | 0.02630615  |
| GO:0009651                  | response to salt stress                              | 1                                          | 2                     | 0.027332421 |
| GO:0008152                  | metabolic process                                    | 1                                          | 2                     | 0.052083059 |
| GO:0005886                  | plasma membrane                                      | 1                                          | 2                     | 0.147255393 |

**Cluster 21**

| <b>GO Identifier</b> | <b>#Loci</b> | <b>Associated Loci (Left to Right)</b> |
|----------------------|--------------|----------------------------------------|
| GO:0003983           | 1            | AT5G17310                              |
| GO:0005886           | 1            | AT5G17310                              |
| GO:0008152           | 1            | AT5G17310                              |
| GO:0009651           | 1            | AT5G17310                              |
| GO:0046686           | 1            | AT5G17310                              |

**Cluster 22**

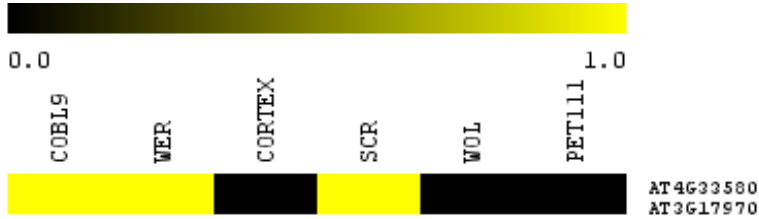

**Cluster 22**  
 AT3G17970  
 AT4G33580

| Cluster 22<br>GO identifier | Description                                                      | #<br>Associated<br>to the GO<br>in Cluster | Total # in<br>Cluster | p-value     |
|-----------------------------|------------------------------------------------------------------|--------------------------------------------|-----------------------|-------------|
| GO:0016884                  | carbon-nitrogen ligase activity, with glutamine as amido-N-donor | 1                                          | 2                     | 9.59E-05    |
| GO:0015976                  | carbon utilization                                               | 1                                          | 2                     | 5.75E-04    |
| GO:0004089                  | carbonate dehydratase activity                                   | 1                                          | 2                     | 0.001437538 |
| GO:0009507                  | chloroplast                                                      | 2                                          | 2                     | 0.012574049 |
| GO:0005488                  | binding                                                          | 1                                          | 2                     | 0.041583373 |
| GO:0008270                  | zinc ion binding                                                 | 1                                          | 2                     | 0.066578273 |

**Cluster 22**

| <b>GO Identifier</b> | <b>#Loci</b> | <b>Associated Loci (Left to Right)</b> |
|----------------------|--------------|----------------------------------------|
| GO:0004089           | 1            | AT4G33580                              |
| GO:0005488           | 1            | AT3G17970                              |
| GO:0008270           | 1            | AT4G33580                              |
| GO:0009507           | 2            | AT3G17970    AT4G33580                 |
| GO:0015976           | 1            | AT4G33580                              |
| GO:0016884           | 1            | AT3G17970                              |

# Cluster 23

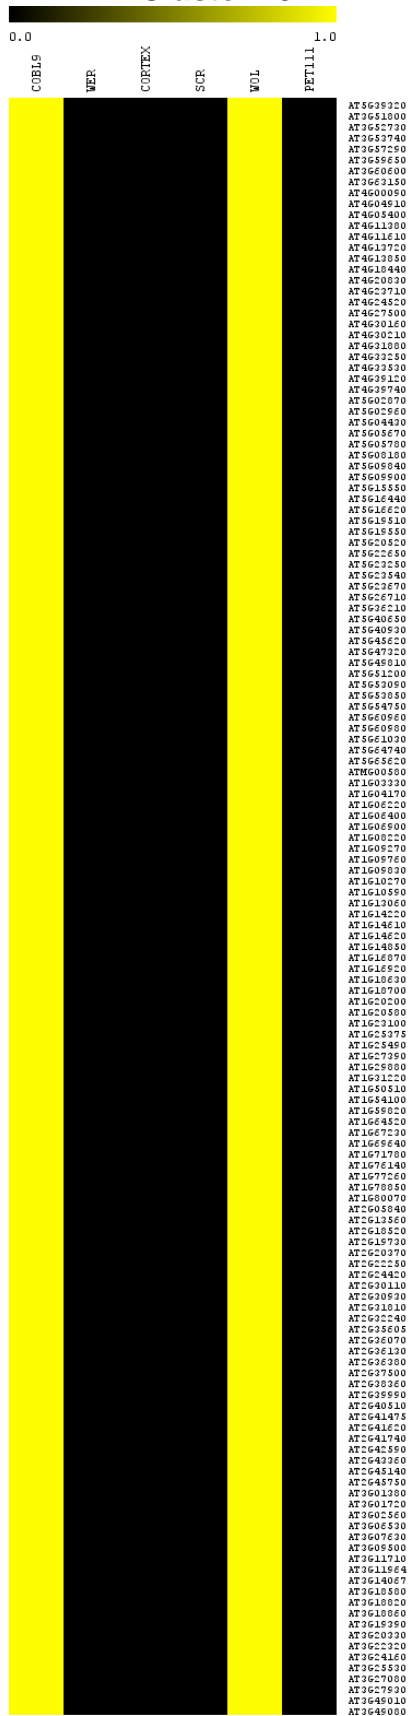



**Cluster 23**

AT1G03330 AT2G05840 AT3G01380 AT4G00090 AT5G02870  
 AT1G04170 AT2G13560 AT3G01720 AT4G04910 AT5G02960  
 AT1G06220 AT2G18520 AT3G02560 AT4G05400 AT5G04430  
 AT1G06400 AT2G19730 AT3G06530 AT4G11380 AT5G05670  
 AT1G06900 AT2G20370 AT3G07630 AT4G11610 AT5G05780  
 AT1G08220 AT2G22250 AT3G09500 AT4G13720 AT5G08180  
 AT1G09270 AT2G24420 AT3G11710 AT4G13850 AT5G09840  
 AT1G09760 AT2G30110 AT3G11964 AT4G18440 AT5G09900  
 AT1G09830 AT2G30930 AT3G14067 AT4G20830 AT5G15550  
 AT1G10270 AT2G31810 AT3G18580 AT4G23710 AT5G16440  
 AT1G10590 AT2G32240 AT3G18820 AT4G24520 AT5G16620  
 AT1G13060 AT2G35605 AT3G18860 AT4G27500 AT5G19510  
 AT1G14220 AT2G36070 AT3G19390 AT4G30160 AT5G19550  
 AT1G14610 AT2G36130 AT3G20330 AT4G30210 AT5G20520  
 AT1G14620 AT2G36380 AT3G22320 AT4G31880 AT5G22650  
 AT1G14850 AT2G37500 AT3G24160 AT4G33250 AT5G23250  
 AT1G16870 AT2G38360 AT3G25530 AT4G33530 AT5G23540  
 AT1G16920 AT2G39990 AT3G27080 AT4G39120 AT5G23670  
 AT1G18630 AT2G40510 AT3G27930 AT4G39740 AT5G26710  
 AT1G18700 AT2G41475 AT3G49010 AT5G36210  
 AT1G20200 AT2G41620 AT3G49080 AT5G39320  
 AT1G20580 AT2G41740 AT3G51800 AT5G40650  
 AT1G23100 AT2G42590 AT3G52730 AT5G40930  
 AT1G25375 AT2G43360 AT3G53740 AT5G45620  
 AT1G25490 AT2G45140 AT3G57290 AT5G47320  
 AT1G27390 AT2G45750 AT3G59650 AT5G49810  
 AT1G29880 AT3G60600 AT5G51200  
 AT1G31220 AT3G63150 AT5G53090  
 AT1G50510 AT5G53850  
 AT1G54100 AT5G54750  
 AT1G59820 AT5G60960  
 AT1G64520 AT5G60980  
 AT1G67230 AT5G61030  
 AT1G69640 AT5G64740  
 AT1G71780 AT5G65620  
 AT1G76140 ATMG00580  
 AT1G77260  
 AT1G78850  
 AT1G80070

| Cluster 23<br>GO identifier | Description                                                  | #<br>Associated<br>to the GO<br>in Cluster | Total # in<br>Cluster | p-value  |
|-----------------------------|--------------------------------------------------------------|--------------------------------------------|-----------------------|----------|
| GO:0008541                  | proteasome regulatory particle, lid subcomplex               | 6                                          | 147                   | 4.94E-11 |
| GO:0005783                  | endoplasmic reticulum                                        | 15                                         | 147                   | 5.83E-10 |
| GO:0005886                  | plasma membrane                                              | 35                                         | 147                   | 2.58E-09 |
| GO:0005730                  | nucleolus                                                    | 12                                         | 147                   | 1.13E-07 |
| GO:0006626                  | protein targeting to mitochondrion                           | 4                                          | 147                   | 3.97E-06 |
| GO:0005744                  | mitochondrial inner membrane presequence translocase complex | 4                                          | 147                   | 1.03E-05 |
| GO:0005742                  | mitochondrial outer membrane translocase complex             | 3                                          | 147                   | 1.17E-05 |

| Cluster 23<br>GO identifier<br>(con.) | Description                                                           | #<br>Associated<br>to the GO<br>in Cluster | Total # in<br>Cluster | p-value     |
|---------------------------------------|-----------------------------------------------------------------------|--------------------------------------------|-----------------------|-------------|
| GO:0005739                            | mitochondrion                                                         | 17                                         | 147                   | 2.26E-05    |
| GO:0005852                            | eukaryotic translation initiation factor 3 complex                    | 3                                          | 147                   | 2.76E-05    |
| GO:0006412                            | translation                                                           | 10                                         | 147                   | 4.05E-05    |
| GO:0003958                            | NADPH-hemoprotein reductase activity                                  | 2                                          | 147                   | 4.93E-05    |
| GO:0006511                            | ubiquitin-dependent protein catabolic process                         | 7                                          | 147                   | 3.44E-04    |
| GO:0022625                            | cytosolic large ribosomal subunit                                     | 5                                          | 147                   | 6.38E-04    |
| GO:0004069                            | L-aspartate:2-oxoglutarate aminotransferase activity                  | 2                                          | 147                   | 0.001000775 |
| GO:0022626                            | cytosolic ribosome                                                    | 6                                          | 147                   | 0.001016913 |
| GO:0003743                            | translation initiation factor activity                                | 4                                          | 147                   | 0.001378602 |
| GO:0009640                            | photomorphogenesis                                                    | 3                                          | 147                   | 0.002106128 |
| GO:0009698                            | phenylpropanoid metabolic process                                     | 2                                          | 147                   | 0.00254891  |
| GO:0003735                            | structural constituent of ribosome                                    | 7                                          | 147                   | 0.00313795  |
| GO:0015450                            | P-P-bond-hydrolysis-driven protein transmembrane transporter activity | 3                                          | 147                   | 0.003208669 |
| GO:0009507                            | chloroplast                                                           | 27                                         | 147                   | 0.003245621 |
| GO:0042254                            | ribosome biogenesis                                                   | 4                                          | 147                   | 0.003745125 |
| GO:0003723                            | RNA binding                                                           | 7                                          | 147                   | 0.003808517 |
| GO:0016597                            | amino acid binding                                                    | 2                                          | 147                   | 0.005370481 |
| GO:0005741                            | mitochondrial outer membrane                                          | 2                                          | 147                   | 0.006044194 |
| GO:0006913                            | nucleocytoplasmic transport                                           | 2                                          | 147                   | 0.006752403 |
| GO:0003858                            | 3-hydroxybutyrate dehydrogenase activity                              | 1                                          | 147                   | 0.007048669 |
| GO:0004070                            | aspartate carbamoyltransferase activity                               | 1                                          | 147                   | 0.007048669 |
| GO:0004076                            | biotin synthase activity                                              | 1                                          | 147                   | 0.007048669 |
| GO:0004358                            | glutamate N-acetyltransferase activity                                | 1                                          | 147                   | 0.007048669 |
| GO:0004637                            | phosphoribosylamine-glycine ligase activity                           | 1                                          | 147                   | 0.007048669 |
| GO:0004644                            | phosphoribosylglycinamide formyltransferase activity                  | 1                                          | 147                   | 0.007048669 |
| GO:0004824                            | lysine-tRNA ligase activity                                           | 1                                          | 147                   | 0.007048669 |
| GO:0006430                            | lysyl-tRNA aminoacylation                                             | 1                                          | 147                   | 0.007048669 |
| GO:0009240                            | isopentenyl diphosphate biosynthetic process                          | 1                                          | 147                   | 0.007048669 |
| GO:0010256                            | endomembrane organization                                             | 1                                          | 147                   | 0.007048669 |
| GO:0010330                            | cellulose synthase complex                                            | 1                                          | 147                   | 0.007048669 |
| GO:0019866                            | organelle inner membrane                                              | 1                                          | 147                   | 0.007048669 |
| GO:0030581                            | intracellular protein transport in host                               | 1                                          | 147                   | 0.007048669 |
| GO:0042353                            | fucose biosynthetic process                                           | 1                                          | 147                   | 0.007048669 |
| GO:0046500                            | S-adenosylmethionine metabolic process                                | 1                                          | 147                   | 0.007048669 |
| GO:0046512                            | sphingosine biosynthetic process                                      | 1                                          | 147                   | 0.007048669 |
| GO:0046719                            | regulation of viral protein levels in host cell                       | 1                                          | 147                   | 0.007048669 |
| GO:0048194                            | Golgi vesicle budding                                                 | 1                                          | 147                   | 0.007048669 |
| GO:0006508                            | proteolysis                                                           | 7                                          | 147                   | 0.007320884 |
| GO:0005737                            | cytoplasm                                                             | 8                                          | 147                   | 0.00732732  |
| GO:0007010                            | cytoskeleton organization                                             | 2                                          | 147                   | 0.008269037 |
| GO:0005773                            | vacuole                                                               | 8                                          | 147                   | 0.009165095 |
| GO:0030163                            | protein catabolic process                                             | 2                                          | 147                   | 0.00991396  |
| GO:0005794                            | Golgi apparatus                                                       | 4                                          | 147                   | 0.010741474 |
| GO:0005643                            | nuclear pore                                                          | 2                                          | 147                   | 0.010782572 |
| GO:0000398                            | nuclear mRNA splicing, via spliceosome                                | 2                                          | 147                   | 0.012608286 |
| GO:0006418                            | tRNA aminoacylation for protein translation                           | 2                                          | 147                   | 0.012608286 |
| GO:0016071                            | mRNA metabolic process                                                | 2                                          | 147                   | 0.012608286 |
| GO:0005732                            | small nucleolar ribonucleoprotein complex                             | 2                                          | 147                   | 0.013563895 |
| GO:0000170                            | sphingosine hydroxylase activity                                      | 1                                          | 147                   | 0.013998643 |
| GO:0004452                            | isopentenyl-diphosphate delta-isomerase activity                      | 1                                          | 147                   | 0.013998643 |
| GO:0004758                            | serine C-palmitoyltransferase activity                                | 1                                          | 147                   | 0.013998643 |

| Cluster 23<br>GO identifier<br>(con.) | Description                                                               | #<br>Associated<br>to the GO<br>in Cluster | Total # in<br>Cluster | p-value     |
|---------------------------------------|---------------------------------------------------------------------------|--------------------------------------------|-----------------------|-------------|
| GO:0004818                            | glutamate-tRNA ligase activity                                            | 1                                          | 147                   | 0.013998643 |
| GO:0004820                            | glycine-tRNA ligase activity                                              | 1                                          | 147                   | 0.013998643 |
| GO:0004839                            | ubiquitin activating enzyme activity                                      | 1                                          | 147                   | 0.013998643 |
| GO:0005487                            | nucleocytoplasmic transporter activity                                    | 1                                          | 147                   | 0.013998643 |
| GO:0005548                            | phospholipid transporter activity                                         | 1                                          | 147                   | 0.013998643 |
| GO:0005853                            | eukaryotic translation elongation factor 1 complex                        | 1                                          | 147                   | 0.013998643 |
| GO:0006426                            | glycyl-tRNA aminoacylation                                                | 1                                          | 147                   | 0.013998643 |
| GO:0006997                            | nucleus organization                                                      | 1                                          | 147                   | 0.013998643 |
| GO:0009220                            | pyrimidine ribonucleotide biosynthetic process                            | 1                                          | 147                   | 0.013998643 |
| GO:0010155                            | regulation of proton transport                                            | 1                                          | 147                   | 0.013998643 |
| GO:0015462                            | protein-transmembrane transporting ATPase activity                        | 1                                          | 147                   | 0.013998643 |
| GO:0016743                            | carboxyl- or carbamoyltransferase activity                                | 1                                          | 147                   | 0.013998643 |
| GO:0030173                            | integral to Golgi membrane                                                | 1                                          | 147                   | 0.013998643 |
| GO:0045281                            | succinate dehydrogenase complex                                           | 1                                          | 147                   | 0.013998643 |
| GO:0046520                            | sphingoid biosynthetic process                                            | 1                                          | 147                   | 0.013998643 |
| GO:0005743                            | mitochondrial inner membrane                                              | 3                                          | 147                   | 0.014056439 |
| GO:0003984                            | acetolactate synthase activity                                            | 1                                          | 147                   | 0.020850949 |
| GO:0004776                            | succinate-CoA ligase (GDP-forming) activity                               | 1                                          | 147                   | 0.020850949 |
| GO:0005047                            | signal recognition particle binding                                       | 1                                          | 147                   | 0.020850949 |
| GO:0009102                            | biotin biosynthetic process                                               | 1                                          | 147                   | 0.020850949 |
| GO:0009647                            | skotomorphogenesis                                                        | 1                                          | 147                   | 0.020850949 |
| GO:0030148                            | sphingolipid biosynthetic process                                         | 1                                          | 147                   | 0.020850949 |
| GO:0051788                            | response to misfolded protein                                             | 1                                          | 147                   | 0.020850949 |
| GO:0000104                            | succinate dehydrogenase activity                                          | 1                                          | 147                   | 0.027606608 |
| GO:0000326                            | protein storage vacuole                                                   | 1                                          | 147                   | 0.027606608 |
| GO:0003727                            | single-stranded RNA binding                                               | 1                                          | 147                   | 0.027606608 |
| GO:0003979                            | UDP-glucose 6-dehydrogenase activity                                      | 1                                          | 147                   | 0.027606608 |
| GO:0006121                            | mitochondrial electron transport, succinate to ubiquinone                 | 1                                          | 147                   | 0.027606608 |
| GO:0008864                            | formyltetrahydrofolate deformylase activity                               | 1                                          | 147                   | 0.027606608 |
| GO:0009833                            | primary cell wall biogenesis                                              | 1                                          | 147                   | 0.027606608 |
| GO:0016742                            | hydroxymethyl-, formyl- and related transferase activity                  | 1                                          | 147                   | 0.027606608 |
| GO:0031897                            | Tic complex                                                               | 1                                          | 147                   | 0.027606608 |
| GO:0043161                            | proteasomal ubiquitin-dependent protein catabolic process                 | 1                                          | 147                   | 0.027606608 |
| GO:0005840                            | ribosome                                                                  | 4                                          | 147                   | 0.031563865 |
| GO:0005763                            | mitochondrial small ribosomal subunit                                     | 1                                          | 147                   | 0.034266631 |
| GO:0006424                            | glutamyl-tRNA aminoacylation                                              | 1                                          | 147                   | 0.034266631 |
| GO:0009082                            | branched chain family amino acid biosynthetic process                     | 1                                          | 147                   | 0.034266631 |
| GO:0009113                            | purine base biosynthetic process                                          | 1                                          | 147                   | 0.034266631 |
| GO:0009152                            | purine ribonucleotide biosynthetic process                                | 1                                          | 147                   | 0.034266631 |
| GO:0009969                            | xyloglucan biosynthetic process                                           | 1                                          | 147                   | 0.034266631 |
| GO:0016462                            | pyrophosphatase activity                                                  | 1                                          | 147                   | 0.034266631 |
| GO:0046907                            | intracellular transport                                                   | 1                                          | 147                   | 0.034266631 |
| GO:0016020                            | membrane                                                                  | 14                                         | 147                   | 0.0388827   |
| GO:0006886                            | intracellular protein transport                                           | 3                                          | 147                   | 0.03966244  |
| GO:0000502                            | proteasome complex                                                        | 1                                          | 147                   | 0.040832019 |
| GO:0004470                            | malic enzyme activity                                                     | 1                                          | 147                   | 0.040832019 |
| GO:0004664                            | prephenate dehydratase activity                                           | 1                                          | 147                   | 0.040832019 |
| GO:0006122                            | mitochondrial electron transport, ubiquinol to cytochrome c               | 1                                          | 147                   | 0.040832019 |
| GO:0006164                            | purine nucleotide biosynthetic process                                    | 1                                          | 147                   | 0.040832019 |
| GO:0009094                            | L-phenylalanine biosynthetic process                                      | 1                                          | 147                   | 0.040832019 |
| GO:0016652                            | oxidoreductase activity, acting on NADH or NADPH, NAD or NADP as acceptor | 1                                          | 147                   | 0.040832019 |

| Cluster 23<br>GO identifier<br>(con.) | Description                                               | #<br>Associated<br>to the GO<br>in Cluster | Total # in<br>Cluster | p-value     |
|---------------------------------------|-----------------------------------------------------------|--------------------------------------------|-----------------------|-------------|
| GO:0045037                            | protein import into chloroplast stroma                    | 1                                          | 147                   | 0.040832019 |
| GO:0047769                            | arogenate dehydratase activity                            | 1                                          | 147                   | 0.040832019 |
| GO:0048528                            | post-embryonic root development                           | 1                                          | 147                   | 0.040832019 |
| GO:0005618                            | cell wall                                                 | 5                                          | 147                   | 0.043023368 |
| GO:0003779                            | actin binding                                             | 2                                          | 147                   | 0.044680713 |
| GO:0015030                            | Cajal body                                                | 1                                          | 147                   | 0.047303764 |
| GO:0031540                            | regulation of anthocyanin biosynthetic process            | 1                                          | 147                   | 0.047303764 |
| GO:0000166                            | nucleotide binding                                        | 4                                          | 147                   | 0.049361996 |
| GO:0006413                            | translational initiation                                  | 2                                          | 147                   | 0.050604051 |
| GO:0004616                            | phosphogluconate dehydrogenase (decarboxylating) activity | 1                                          | 147                   | 0.053682849 |
| GO:0006446                            | regulation of translational initiation                    | 1                                          | 147                   | 0.053682849 |
| GO:0006506                            | GPI anchor biosynthetic process                           | 1                                          | 147                   | 0.053682849 |
| GO:0006526                            | arginine biosynthetic process                             | 1                                          | 147                   | 0.053682849 |
| GO:0008135                            | translation factor activity, nucleic acid binding         | 1                                          | 147                   | 0.053682849 |
| GO:0010005                            | cortical microtubule, transverse to long axis             | 1                                          | 147                   | 0.053682849 |
| GO:0008121                            | ubiquinol-cytochrome-c reductase activity                 | 1                                          | 147                   | 0.059970247 |
| GO:0008441                            | 3'(2'),5'-bisphosphate nucleotidase activity              | 1                                          | 147                   | 0.059970247 |
| GO:0030276                            | clathrin binding                                          | 1                                          | 147                   | 0.059970247 |
| GO:0043622                            | cortical microtubule organization                         | 1                                          | 147                   | 0.059970247 |
| GO:0007264                            | small GTPase mediated signal transduction                 | 2                                          | 147                   | 0.06135929  |
| GO:0003690                            | double-stranded DNA binding                               | 1                                          | 147                   | 0.066166923 |
| GO:0004521                            | endoribonuclease activity                                 | 1                                          | 147                   | 0.066166923 |
| GO:0006108                            | malate metabolic process                                  | 1                                          | 147                   | 0.066166923 |
| GO:0048364                            | root development                                          | 2                                          | 147                   | 0.070877003 |
| GO:0005634                            | nucleus                                                   | 15                                         | 147                   | 0.074621587 |
| GO:0009908                            | flower development                                        | 2                                          | 147                   | 0.077330608 |
| GO:0005524                            | ATP binding                                               | 7                                          | 147                   | 0.078070027 |
| GO:0003697                            | single-stranded DNA binding                               | 1                                          | 147                   | 0.078291924 |
| GO:0005802                            | trans-Golgi network                                       | 1                                          | 147                   | 0.078291924 |
| GO:0009789                            | positive regulation of abscisic acid mediated signaling   | 1                                          | 147                   | 0.078291924 |
| GO:0045309                            | protein phosphorylated amino acid binding                 | 1                                          | 147                   | 0.078291924 |
| GO:0009055                            | electron carrier activity                                 | 2                                          | 147                   | 0.080581205 |
| GO:0016192                            | vesicle-mediated transport                                | 2                                          | 147                   | 0.083844009 |
| GO:0005654                            | nucleoplasm                                               | 1                                          | 147                   | 0.084222135 |
| GO:0006790                            | sulfur metabolic process                                  | 1                                          | 147                   | 0.084222135 |
| GO:0008180                            | signalosome                                               | 1                                          | 147                   | 0.084222135 |
| GO:0009863                            | salicylic acid mediated signaling pathway                 | 1                                          | 147                   | 0.084222135 |
| GO:0009793                            | embryonic development ending in seed dormancy             | 4                                          | 147                   | 0.087125064 |
| GO:0005829                            | cytosol                                                   | 3                                          | 147                   | 0.088228619 |
| GO:0000159                            | protein phosphatase type 2A complex                       | 1                                          | 147                   | 0.090065394 |
| GO:0004028                            | 3-chloroallyl aldehyde dehydrogenase activity             | 1                                          | 147                   | 0.090065394 |
| GO:0004407                            | histone deacetylase activity                              | 1                                          | 147                   | 0.090065394 |
| GO:0005740                            | mitochondrial envelope                                    | 1                                          | 147                   | 0.090065394 |
| GO:0005750                            | mitochondrial respiratory chain complex III               | 1                                          | 147                   | 0.090065394 |
| GO:0008601                            | protein phosphatase type 2A regulator activity            | 1                                          | 147                   | 0.090065394 |
| GO:0022627                            | cytosolic small ribosomal subunit                         | 2                                          | 147                   | 0.090395854 |
| GO:0005525                            | GTP binding                                               | 3                                          | 147                   | 0.091026166 |
| GO:0009651                            | response to salt stress                                   | 4                                          | 147                   | 0.093615704 |
| GO:0015031                            | protein transport                                         | 2                                          | 147                   | 0.095322961 |
| GO:0004437                            | inositol or phosphatidylinositol phosphatase activity     | 1                                          | 147                   | 0.095822622 |
| GO:0009269                            | response to desiccation                                   | 1                                          | 147                   | 0.095822622 |
| GO:0003746                            | translation elongation factor activity                    | 1                                          | 147                   | 0.101494733 |

| Cluster 23<br>GO identifier<br>(con.) | Description                                                                           | #<br>Associated<br>to the GO<br>in Cluster | Total # in<br>Cluster | p-value     |
|---------------------------------------|---------------------------------------------------------------------------------------|--------------------------------------------|-----------------------|-------------|
| GO:0009944                            | polarity specification of adaxial/abaxial axis                                        | 1                                          | 147                   | 0.101494733 |
| GO:0006979                            | response to oxidative stress                                                          | 3                                          | 147                   | 0.106908312 |
| GO:0006520                            | amino acid metabolic process                                                          | 1                                          | 147                   | 0.10708263  |
| GO:0006807                            | nitrogen compound metabolic process                                                   | 1                                          | 147                   | 0.112587207 |
| GO:0006888                            | ER to Golgi vesicle-mediated transport                                                | 1                                          | 147                   | 0.112587207 |
| GO:0015662                            | ATPase activity, coupled to transmembrane movement of ions, phosphorylative mechanism | 1                                          | 147                   | 0.112587207 |
| GO:0008299                            | isoprenoid biosynthetic process                                                       | 1                                          | 147                   | 0.118009354 |
| GO:0006457                            | protein folding                                                                       | 3                                          | 147                   | 0.11801709  |
| GO:0008757                            | S-adenosylmethionine-dependent methyltransferase activity                             | 1                                          | 147                   | 0.123349947 |
| GO:0051301                            | cell division                                                                         | 1                                          | 147                   | 0.123349947 |
| GO:0006397                            | mRNA processing                                                                       | 1                                          | 147                   | 0.128609859 |
| GO:0015079                            | potassium ion transmembrane transporter activity                                      | 1                                          | 147                   | 0.128609859 |
| GO:0030244                            | cellulose biosynthetic process                                                        | 1                                          | 147                   | 0.128609859 |
| GO:0005789                            | endoplasmic reticulum membrane                                                        | 1                                          | 147                   | 0.133789952 |
| GO:0006414                            | translational elongation                                                              | 1                                          | 147                   | 0.133789952 |
| GO:0009570                            | chloroplast stroma                                                                    | 4                                          | 147                   | 0.134326247 |
| GO:0004812                            | aminoacyl-tRNA ligase activity                                                        | 1                                          | 147                   | 0.138891079 |
| GO:0006461                            | protein complex assembly                                                              | 1                                          | 147                   | 0.138891079 |
| GO:0010119                            | regulation of stomatal movement                                                       | 1                                          | 147                   | 0.138891079 |
| GO:0016049                            | cell growth                                                                           | 1                                          | 147                   | 0.138891079 |
| GO:0048825                            | cotyledon development                                                                 | 1                                          | 147                   | 0.138891079 |
| GO:0009832                            | plant-type cell wall biogenesis                                                       | 1                                          | 147                   | 0.143914088 |
| GO:0008380                            | RNA splicing                                                                          | 1                                          | 147                   | 0.148859818 |
| GO:0009294                            | DNA mediated transformation                                                           | 1                                          | 147                   | 0.148859818 |
| GO:0048046                            | apoplast                                                                              | 3                                          | 147                   | 0.15050596  |
| GO:0015995                            | chlorophyll biosynthetic process                                                      | 1                                          | 147                   | 0.153729099 |
| GO:0006352                            | transcription initiation                                                              | 1                                          | 147                   | 0.158522755 |
| GO:0016481                            | negative regulation of transcription                                                  | 1                                          | 147                   | 0.158522755 |
| GO:0007275                            | multicellular organismal development                                                  | 2                                          | 147                   | 0.164619705 |
| GO:0009536                            | plastid                                                                               | 2                                          | 147                   | 0.168925026 |
| GO:0009706                            | chloroplast inner membrane                                                            | 1                                          | 147                   | 0.176957314 |
| GO:0009790                            | embryonic development                                                                 | 1                                          | 147                   | 0.176957314 |
| GO:0008236                            | serine-type peptidase activity                                                        | 1                                          | 147                   | 0.18138492  |
| GO:0003924                            | GTPase activity                                                                       | 1                                          | 147                   | 0.190028362 |
| GO:0010583                            | response to cyclopentenone                                                            | 1                                          | 147                   | 0.190028362 |
| GO:0015934                            | large ribosomal subunit                                                               | 1                                          | 147                   | 0.190028362 |
| GO:0016759                            | cellulose synthase activity                                                           | 1                                          | 147                   | 0.194245733 |
| GO:0009658                            | chloroplast organization                                                              | 1                                          | 147                   | 0.198394547 |
| GO:0009926                            | auxin polar transport                                                                 | 1                                          | 147                   | 0.198394547 |
| GO:0009845                            | seed germination                                                                      | 1                                          | 147                   | 0.202475553 |
| GO:0009965                            | leaf morphogenesis                                                                    | 1                                          | 147                   | 0.202475553 |
| GO:0048367                            | shoot development                                                                     | 1                                          | 147                   | 0.202475553 |
| GO:0009738                            | abscisic acid mediated signaling                                                      | 1                                          | 147                   | 0.206489493 |
| GO:0005509                            | calcium ion binding                                                                   | 2                                          | 147                   | 0.207557623 |
| GO:0005198                            | structural molecule activity                                                          | 1                                          | 147                   | 0.218136234 |
| GO:0003824                            | catalytic activity                                                                    | 3                                          | 147                   | 0.220822517 |
| GO:0006813                            | potassium ion transport                                                               | 1                                          | 147                   | 0.221889191 |
| GO:0009735                            | response to cytokinin stimulus                                                        | 1                                          | 147                   | 0.225578688 |
| GO:0003899                            | DNA-directed RNA polymerase activity                                                  | 1                                          | 147                   | 0.2327701   |
| GO:0009409                            | response to cold                                                                      | 2                                          | 147                   | 0.235539685 |
| GO:0008233                            | peptidase activity                                                                    | 1                                          | 147                   | 0.236273396 |

| Cluster 23<br>GO identifier<br>(con.) | Description                                                      | #<br>Associated<br>to the GO<br>in Cluster | Total # in<br>Cluster | p-value     |
|---------------------------------------|------------------------------------------------------------------|--------------------------------------------|-----------------------|-------------|
| GO:0006350                            | transcription                                                    | 1                                          | 147                   | 0.243098575 |
| GO:0051707                            | response to other organism                                       | 1                                          | 147                   | 0.246421801 |
| GO:0009737                            | response to abscisic acid stimulus                               | 2                                          | 147                   | 0.248568793 |
| GO:0005834                            | heterotrimeric G-protein complex                                 | 1                                          | 147                   | 0.259134313 |
| GO:0009555                            | pollen development                                               | 1                                          | 147                   | 0.259134313 |
| GO:0003755                            | peptidyl-prolyl cis-trans isomerase activity                     | 1                                          | 147                   | 0.262170575 |
| GO:0009505                            | plant-type cell wall                                             | 2                                          | 147                   | 0.265656198 |
| GO:0006970                            | response to osmotic stress                                       | 1                                          | 147                   | 0.270949002 |
| GO:0046686                            | response to cadmium ion                                          | 2                                          | 147                   | 0.273397644 |
| GO:0006396                            | RNA processing                                                   | 1                                          | 147                   | 0.273767087 |
| GO:0016567                            | protein ubiquitination                                           | 1                                          | 147                   | 0.279244826 |
| GO:0017111                            | nucleoside-triphosphatase activity                               | 1                                          | 147                   | 0.292042637 |
| GO:0008565                            | protein transporter activity                                     | 1                                          | 147                   | 0.305791355 |
| GO:0048366                            | leaf development                                                 | 1                                          | 147                   | 0.314037224 |
| GO:0009826                            | unidimensional cell growth                                       | 1                                          | 147                   | 0.321586346 |
| GO:0046872                            | metal ion binding                                                | 1                                          | 147                   | 0.321586346 |
| GO:0016740                            | transferase activity                                             | 1                                          | 147                   | 0.323368557 |
| GO:0009058                            | biosynthetic process                                             | 1                                          | 147                   | 0.328470885 |
| GO:0042626                            | ATPase activity, coupled to transmembrane movement of substances | 1                                          | 147                   | 0.334721763 |
| GO:0009408                            | response to heat                                                 | 1                                          | 147                   | 0.344224829 |
| GO:0009723                            | response to ethylene stimulus                                    | 1                                          | 147                   | 0.349964028 |
| GO:0031072                            | heat shock protein binding                                       | 1                                          | 147                   | 0.357472367 |
| GO:0042742                            | defense response to bacterium                                    | 1                                          | 147                   | 0.369918678 |

### Cluster 23

| <u>GO Identifier</u> | <u>#Loci</u> | <u>Associated Loci (Left to Right)</u> |           |           |           |           |           |
|----------------------|--------------|----------------------------------------|-----------|-----------|-----------|-----------|-----------|
| GO:0000104           | 1            | AT5G40650                              |           |           |           |           |           |
| GO:0000159           | 1            | AT1G25490                              |           |           |           |           |           |
| GO:0000166           | 4            | AT3G18860                              | AT4G00090 | AT4G04910 | AT5G15550 |           |           |
| GO:0000170           | 1            | AT1G69640                              |           |           |           |           |           |
| GO:0000326           | 1            | AT3G60600                              |           |           |           |           |           |
| GO:0000398           | 2            | AT1G09760                              | AT1G80070 |           |           |           |           |
| GO:0000502           | 1            | AT1G64520                              |           |           |           |           |           |
| GO:0003690           | 1            | AT4G13850                              |           |           |           |           |           |
| GO:0003697           | 1            | AT4G13850                              |           |           |           |           |           |
| GO:0003723           | 7            | AT1G18630                              | AT3G11964 | AT4G13850 | AT5G08180 | AT5G47320 | AT5G60980 |
|                      |              | AT5G61030                              |           |           |           |           |           |
| GO:0003727           | 1            | AT5G04430                              |           |           |           |           |           |
| GO:0003735           | 7            | AT2G19730                              | AT3G02560 | AT3G09500 | AT3G49010 | AT3G49080 | AT3G53740 |
|                      |              | AT5G02870                              |           |           |           |           |           |
| GO:0003743           | 4            | AT1G04170                              | AT2G39990 | AT3G57290 | AT4G33250 |           |           |
| GO:0003746           | 1            | AT5G19510                              |           |           |           |           |           |
| GO:0003755           | 1            | AT2G36130                              |           |           |           |           |           |
| GO:0003779           | 2            | AT2G41740                              | AT4G30160 |           |           |           |           |
| GO:0003824           | 3            | AT1G25375                              | AT1G69640 | AT2G20370 |           |           |           |
| GO:0003858           | 1            | AT3G25530                              |           |           |           |           |           |
| GO:0003899           | 1            | AT3G22320                              |           |           |           |           |           |
| GO:0003924           | 1            | AT3G63150                              |           |           |           |           |           |
| GO:0003958           | 2            | AT4G24520                              | AT4G30210 |           |           |           |           |
| GO:0003979           | 1            | AT5G39320                              |           |           |           |           |           |
| GO:0003984           | 1            | AT2G31810                              |           |           |           |           |           |
| GO:0004028           | 1            | AT1G54100                              |           |           |           |           |           |
| GO:0004069           | 2            | AT2G22250                              | AT5G19550 |           |           |           |           |

**Cluster 23 (con.)**

| <b>GO Identifier</b> | <b>#Loci</b> | <b>Associated Loci (Left to Right)</b> |           |           |           |           |           |
|----------------------|--------------|----------------------------------------|-----------|-----------|-----------|-----------|-----------|
| GO:0004070           | 1            | AT3G20330                              |           |           |           |           |           |
| GO:0004076           | 1            | AT2G43360                              |           |           |           |           |           |
| GO:0004358           | 1            | AT2G37500                              |           |           |           |           |           |
| GO:0004407           | 1            | AT5G22650                              |           |           |           |           |           |
| GO:0004437           | 1            | AT4G39120                              |           |           |           |           |           |
| GO:0004452           | 1            | AT5G16440                              |           |           |           |           |           |
| GO:0004470           | 1            | AT2G13560                              |           |           |           |           |           |
| GO:0004521           | 1            | AT1G14220                              |           |           |           |           |           |
| GO:0004616           | 1            | AT3G25530                              |           |           |           |           |           |
| GO:0004637           | 1            | AT1G09830                              |           |           |           |           |           |
| GO:0004644           | 1            | AT1G31220                              |           |           |           |           |           |
| GO:0004664           | 1            | AT3G07630                              |           |           |           |           |           |
| GO:0004758           | 1            | AT5G23670                              |           |           |           |           |           |
| GO:0004776           | 1            | AT5G23250                              |           |           |           |           |           |
| GO:0004812           | 1            | AT1G14610                              |           |           |           |           |           |
| GO:0004818           | 1            | AT5G26710                              |           |           |           |           |           |
| GO:0004820           | 1            | AT1G29880                              |           |           |           |           |           |
| GO:0004824           | 1            | AT3G11710                              |           |           |           |           |           |
| GO:0004839           | 1            | AT2G30110                              |           |           |           |           |           |
| GO:0005047           | 1            | AT5G05670                              |           |           |           |           |           |
| GO:0005198           | 1            | AT2G45140                              |           |           |           |           |           |
| GO:0005487           | 1            | AT1G14850                              |           |           |           |           |           |
| GO:0005509           | 2            | AT2G42590                              | AT3G63150 |           |           |           |           |
| GO:0005524           | 7            | AT1G14610                              | AT1G23100 | AT2G13560 | AT3G11710 | AT4G04910 | AT4G13850 |
|                      |              | AT5G61030                              |           |           |           |           |           |
| GO:0005525           | 3            | AT1G06400                              | AT1G16920 | AT3G18820 |           |           |           |
| GO:0005548           | 1            | AT1G59820                              |           |           |           |           |           |
| GO:0005618           | 5            | AT1G25490                              | AT2G19730 | AT3G49010 | AT5G19550 | AT5G22650 |           |
| GO:0005634           | 15           | AT1G03330                              | AT1G09270 | AT1G09760 | AT1G10270 | AT1G20580 | AT1G64520 |
|                      |              | AT1G67230                              | AT2G35605 | AT2G39990 | AT2G42590 | AT3G18820 | AT3G22320 |
|                      |              | AT3G57290                              | AT5G09900 | AT5G23540 |           |           |           |
| GO:0005643           | 2            | AT1G09270                              | AT1G14850 |           |           |           |           |
| GO:0005654           | 1            | AT1G09760                              |           |           |           |           |           |
| GO:0005730           | 12           | AT1G09760                              | AT1G14850 | AT1G20580 | AT2G41620 | AT3G09500 | AT3G11964 |
|                      |              | AT3G49010                              | AT3G51800 | AT5G02870 | AT5G08180 | AT5G15550 | AT5G22650 |
| GO:0005732           | 2            | AT1G03330                              | AT1G20580 |           |           |           |           |
| GO:0005737           | 8            | AT1G09270                              | AT1G09760 | AT2G39990 | AT2G42590 | AT3G11710 | AT3G57290 |
|                      |              | AT5G09900                              | AT5G26710 |           |           |           |           |
| GO:0005739           | 17           | AT1G14610                              | AT1G18630 | AT1G23100 | AT1G27390 | AT1G29880 | AT2G13560 |
|                      |              | AT2G36070                              | AT3G27080 | AT3G52730 | AT3G59650 | AT3G63150 | AT4G13850 |
|                      |              | AT4G20830                              | AT5G09840 | AT5G23250 | AT5G40650 | AT5G61030 |           |
| GO:0005740           | 1            | AT3G52730                              |           |           |           |           |           |
| GO:0005741           | 2            | AT1G27390                              | AT3G27080 |           |           |           |           |
| GO:0005742           | 3            | AT1G27390                              | AT3G27080 | AT5G40930 |           |           |           |
| GO:0005743           | 3            | AT1G27390                              | AT2G36070 | AT3G27080 |           |           |           |
| GO:0005744           | 4            | AT1G27390                              | AT2G36070 | AT3G27080 | AT5G40930 |           |           |
| GO:0005750           | 1            | AT3G52730                              |           |           |           |           |           |
| GO:0005763           | 1            | AT5G47320                              |           |           |           |           |           |
| GO:0005773           | 8            | AT1G16920                              | AT3G06530 | AT3G14067 | AT4G04910 | AT4G20830 | AT4G23710 |
|                      |              | AT5G02870                              | AT5G23670 |           |           |           |           |
| GO:0005783           | 15           | AT1G18700                              | AT1G69640 | AT1G71780 | AT2G24420 | AT2G38360 | AT2G45140 |
|                      |              | AT3G01380                              | AT3G24160 | AT3G60600 | AT4G24520 | AT4G27500 | AT4G30210 |
|                      |              | AT5G05670                              | AT5G20520 | AT5G23670 |           |           |           |
| GO:0005789           | 1            | AT3G60600                              |           |           |           |           |           |
| GO:0005794           | 4            | AT1G59820                              | AT1G69640 | AT2G20370 | AT5G64740 |           |           |
| GO:0005802           | 1            | AT1G16920                              |           |           |           |           |           |
| GO:0005829           | 3            | AT3G25530                              | AT5G16440 | AT5G19550 |           |           |           |
| GO:0005834           | 1            | AT5G15550                              |           |           |           |           |           |
| GO:0005840           | 4            | AT2G19730                              | AT3G09500 | AT3G49010 | AT3G53740 |           |           |

**Cluster 23 (con.)**

| <b>GO Identifier</b> | <b>#Loci</b> | <b>Associated Loci (Left to Right)</b> |           |           |           |           |           |
|----------------------|--------------|----------------------------------------|-----------|-----------|-----------|-----------|-----------|
| GO:0005852           | 3            | AT2G39990                              | AT3G57290 | AT4G33250 |           |           |           |
| GO:0005853           | 1            | AT5G19510                              |           |           |           |           |           |
| GO:0005886           | 35           | AT1G06400                              | AT1G10590 | AT1G14850 | AT1G16920 | AT1G20200 | AT1G25490 |
|                      |              | AT1G59820                              | AT2G19730 | AT2G24420 | AT2G30110 | AT2G30930 | AT2G36380 |
|                      |              | AT2G42590                              | AT2G45140 | AT3G11964 | AT3G14067 | AT3G18820 | AT3G24160 |
|                      |              | AT3G49010                              | AT3G51800 | AT3G53740 | AT3G57290 | AT3G60600 | AT4G11380 |
|                      |              | AT4G20830                              | AT4G23710 | AT4G27500 | AT4G33530 | AT5G02870 | AT5G05670 |
|                      |              | AT5G19550                              | AT5G20520 | AT5G22650 | AT5G40930 | AT5G64740 |           |
| GO:0006108           | 1            | AT2G13560                              |           |           |           |           |           |
| GO:0006121           | 1            | AT5G40650                              |           |           |           |           |           |
| GO:0006122           | 1            | AT3G52730                              |           |           |           |           |           |
| GO:0006164           | 1            | AT1G09830                              |           |           |           |           |           |
| GO:0006350           | 1            | AT3G22320                              |           |           |           |           |           |
| GO:0006352           | 1            | AT3G57290                              |           |           |           |           |           |
| GO:0006396           | 1            | AT3G11964                              |           |           |           |           |           |
| GO:0006397           | 1            | AT3G11964                              |           |           |           |           |           |
| GO:0006412           | 10           | AT2G19730                              | AT3G02560 | AT3G09500 | AT3G49010 | AT3G49080 | AT3G53740 |
|                      |              | AT3G57290                              | AT5G02870 | AT5G26710 | AT5G47320 |           |           |
| GO:0006413           | 2            | AT2G39990                              | AT4G33250 |           |           |           |           |
| GO:0006414           | 1            | AT5G19510                              |           |           |           |           |           |
| GO:0006418           | 2            | AT1G14610                              | AT5G26710 |           |           |           |           |
| GO:0006424           | 1            | AT5G26710                              |           |           |           |           |           |
| GO:0006426           | 1            | AT1G29880                              |           |           |           |           |           |
| GO:0006430           | 1            | AT3G11710                              |           |           |           |           |           |
| GO:0006446           | 1            | AT4G33250                              |           |           |           |           |           |
| GO:0006457           | 3            | AT1G18700                              | AT1G23100 | AT2G36130 |           |           |           |
| GO:0006461           | 1            | AT4G11380                              |           |           |           |           |           |
| GO:0006506           | 1            | AT3G01380                              |           |           |           |           |           |
| GO:0006508           | 7            | AT1G06900                              | AT1G76140 | AT3G14067 | AT3G19390 | AT3G51800 | AT5G36210 |
|                      |              | AT5G65620                              |           |           |           |           |           |
| GO:0006511           | 7            | AT1G20200                              | AT1G64520 | AT2G30110 | AT5G05780 | AT5G09900 | AT5G23540 |
|                      |              | AT5G45620                              |           |           |           |           |           |
| GO:0006520           | 1            | AT3G20330                              |           |           |           |           |           |
| GO:0006526           | 1            | AT2G37500                              |           |           |           |           |           |
| GO:0006626           | 4            | AT1G27390                              | AT2G36070 | AT3G27080 | AT5G40930 |           |           |
| GO:0006790           | 1            | AT4G39120                              |           |           |           |           |           |
| GO:0006807           | 1            | AT5G19550                              |           |           |           |           |           |
| GO:0006813           | 1            | AT4G33530                              |           |           |           |           |           |
| GO:0006886           | 3            | AT1G09270                              | AT1G16920 | AT4G11380 |           |           |           |
| GO:0006888           | 1            | AT5G54750                              |           |           |           |           |           |
| GO:0006913           | 2            | AT1G14850                              | AT5G60980 |           |           |           |           |
| GO:0006970           | 1            | AT4G13850                              |           |           |           |           |           |
| GO:0006979           | 3            | AT3G25530                              | AT4G20830 | AT4G24520 |           |           |           |
| GO:0006997           | 1            | AT1G67230                              |           |           |           |           |           |
| GO:0007010           | 2            | AT2G41740                              | AT4G30160 |           |           |           |           |
| GO:0007264           | 2            | AT1G06400                              | AT3G18820 |           |           |           |           |
| GO:0007275           | 2            | AT5G09900                              | AT5G53090 |           |           |           |           |
| GO:0008121           | 1            | AT3G52730                              |           |           |           |           |           |
| GO:0008135           | 1            | AT1G04170                              |           |           |           |           |           |
| GO:0008180           | 1            | AT3G57290                              |           |           |           |           |           |
| GO:0008233           | 1            | AT1G64520                              |           |           |           |           |           |
| GO:0008236           | 1            | AT5G36210                              |           |           |           |           |           |
| GO:0008299           | 1            | AT5G16440                              |           |           |           |           |           |
| GO:0008380           | 1            | AT5G04430                              |           |           |           |           |           |
| GO:0008441           | 1            | AT4G39120                              |           |           |           |           |           |
| GO:0008541           | 6            | AT1G20200                              | AT1G64520 | AT5G05780 | AT5G09900 | AT5G23540 | AT5G45620 |
| GO:0008565           | 1            | AT1G09270                              |           |           |           |           |           |
| GO:0008601           | 1            | AT1G25490                              |           |           |           |           |           |
| GO:0008757           | 1            | AT5G49810                              |           |           |           |           |           |



**Cluster 23 (con.)**

| <b>GO Identifier</b> | <b>#Loci</b> | <b>Associated Loci (Left to Right)</b> |           |           |           |           |           |  |
|----------------------|--------------|----------------------------------------|-----------|-----------|-----------|-----------|-----------|--|
| GO:0008864           | 1            | AT1G31220                              |           |           |           |           |           |  |
| GO:0009055           | 2            | AT4G20830                              | AT5G40650 |           |           |           |           |  |
| GO:0009058           | 1            | AT1G31220                              |           |           |           |           |           |  |
| GO:0009082           | 1            | AT2G31810                              |           |           |           |           |           |  |
| GO:0009094           | 1            | AT3G07630                              |           |           |           |           |           |  |
| GO:0009102           | 1            | AT2G43360                              |           |           |           |           |           |  |
| GO:0009113           | 1            | AT1G09830                              |           |           |           |           |           |  |
| GO:0009152           | 1            | AT1G31220                              |           |           |           |           |           |  |
| GO:0009220           | 1            | AT3G20330                              |           |           |           |           |           |  |
| GO:0009240           | 1            | AT5G16440                              |           |           |           |           |           |  |
| GO:0009269           | 1            | AT1G54100                              |           |           |           |           |           |  |
| GO:0009294           | 1            | AT5G22650                              |           |           |           |           |           |  |
| GO:0009408           | 1            | AT1G64520                              |           |           |           |           |           |  |
| GO:0009409           | 2            | AT1G09760                              | AT4G13850 |           |           |           |           |  |
| GO:0009505           | 2            | AT3G14067                              | AT4G20830 |           |           |           |           |  |
| GO:0009507           | 27           | AT1G09760                              | AT1G09830 | AT1G14610 | AT1G14850 | AT1G31220 | AT1G76140 |  |
|                      |              | AT1G80070                              | AT2G13560 | AT2G19730 | AT2G22250 | AT2G30930 | AT2G31810 |  |
|                      |              | AT2G37500                              | AT3G02560 | AT3G06530 | AT3G07630 | AT3G20330 | AT4G30210 |  |
|                      |              | AT4G31880                              | AT4G39120 | AT5G02870 | AT5G16440 | AT5G16620 | AT5G36210 |  |
|                      |              | AT5G51200                              | AT5G53850 | AT5G65620 |           |           |           |  |
| GO:0009536           | 2            | AT1G27390                              | AT5G16440 |           |           |           |           |  |
| GO:0009555           | 1            | AT5G23670                              |           |           |           |           |           |  |
| GO:0009570           | 4            | AT2G42590                              | AT3G20330 | AT5G53850 | AT5G65620 |           |           |  |
| GO:0009640           | 3            | AT1G69640                              | AT3G57290 | AT5G23670 |           |           |           |  |
| GO:0009647           | 1            | AT1G64520                              |           |           |           |           |           |  |
| GO:0009651           | 4            | AT1G54100                              | AT2G13560 | AT3G57290 | AT5G23540 |           |           |  |
| GO:0009658           | 1            | AT5G16620                              |           |           |           |           |           |  |
| GO:0009698           | 2            | AT4G24520                              | AT4G30210 |           |           |           |           |  |
| GO:0009706           | 1            | AT5G16620                              |           |           |           |           |           |  |
| GO:0009723           | 1            | AT1G25490                              |           |           |           |           |           |  |
| GO:0009735           | 1            | AT1G64520                              |           |           |           |           |           |  |
| GO:0009737           | 2            | AT1G54100                              | AT3G63150 |           |           |           |           |  |
| GO:0009738           | 1            | AT1G25490                              |           |           |           |           |           |  |
| GO:0009789           | 1            | AT1G25490                              |           |           |           |           |           |  |
| GO:0009790           | 1            | AT1G10270                              |           |           |           |           |           |  |
| GO:0009793           | 4            | AT1G14610                              | AT1G20200 | AT2G22250 | AT5G09900 |           |           |  |
| GO:0009826           | 1            | AT2G20370                              |           |           |           |           |           |  |
| GO:0009832           | 1            | AT5G64740                              |           |           |           |           |           |  |
| GO:0009833           | 1            | AT5G64740                              |           |           |           |           |           |  |
| GO:0009845           | 1            | AT4G13850                              |           |           |           |           |           |  |
| GO:0009863           | 1            | AT2G20370                              |           |           |           |           |           |  |
| GO:0009908           | 2            | AT1G64520                              | AT3G57290 |           |           |           |           |  |
| GO:0009926           | 1            | AT1G25490                              |           |           |           |           |           |  |
| GO:0009944           | 1            | AT5G22650                              |           |           |           |           |           |  |
| GO:0009965           | 1            | AT5G05780                              |           |           |           |           |           |  |
| GO:0009969           | 1            | AT2G20370                              |           |           |           |           |           |  |
| GO:0010005           | 1            | AT5G64740                              |           |           |           |           |           |  |
| GO:0010119           | 1            | AT1G25490                              |           |           |           |           |           |  |
| GO:0010155           | 1            | AT4G27500                              |           |           |           |           |           |  |
| GO:0010256           | 1            | AT2G20370                              |           |           |           |           |           |  |
| GO:0010330           | 1            | AT5G64740                              |           |           |           |           |           |  |
| GO:0010583           | 1            | AT5G64740                              |           |           |           |           |           |  |
| GO:0015030           | 1            | AT1G09760                              |           |           |           |           |           |  |
| GO:0015031           | 2            | AT1G06400                              | AT3G18820 |           |           |           |           |  |
| GO:0015079           | 1            | AT4G33530                              |           |           |           |           |           |  |
| GO:0015450           | 3            | AT1G27390                              | AT3G27080 | AT5G40930 |           |           |           |  |
| GO:0015462           | 1            | AT2G36070                              |           |           |           |           |           |  |
| GO:0015662           | 1            | AT1G59820                              |           |           |           |           |           |  |
| GO:0015934           | 1            | AT5G02870                              |           |           |           |           |           |  |

**Cluster 23 (con.)**

| <b>GO Identifier</b> | <b>#Loci</b> | <b>Associated Loci (Left to Right)</b> |           |           |           |           |           |
|----------------------|--------------|----------------------------------------|-----------|-----------|-----------|-----------|-----------|
| GO:0015995           | 1            | AT5G16440                              |           |           |           |           |           |
| GO:0016020           | 14           | AT1G80070                              | AT2G18520 | AT2G20370 | AT2G30930 | AT2G39990 | AT3G02560 |
|                      |              | AT3G24160                              | AT3G49010 | AT3G52730 | AT3G53740 | AT5G02870 | AT5G16620 |
|                      |              | AT5G23670                              | AT5G64740 |           |           |           |           |
| GO:0016049           | 1            | AT5G64740                              |           |           |           |           |           |
| GO:0016071           | 2            | AT1G03330                              | AT1G20580 |           |           |           |           |
| GO:0016192           | 2            | AT2G38360                              | AT4G11380 |           |           |           |           |
| GO:0016462           | 1            | AT4G13720                              |           |           |           |           |           |
| GO:0016481           | 1            | AT5G22650                              |           |           |           |           |           |
| GO:0016567           | 1            | AT2G30110                              |           |           |           |           |           |
| GO:0016597           | 2            | AT2G31810                              | AT3G20330 |           |           |           |           |
| GO:0016652           | 1            | AT2G13560                              |           |           |           |           |           |
| GO:0016740           | 1            | AT3G01380                              |           |           |           |           |           |
| GO:0016742           | 1            | AT1G31220                              |           |           |           |           |           |
| GO:0016743           | 1            | AT3G20330                              |           |           |           |           |           |
| GO:0016759           | 1            | AT5G64740                              |           |           |           |           |           |
| GO:0017111           | 1            | AT4G04910                              |           |           |           |           |           |
| GO:0019866           | 1            | AT5G20520                              |           |           |           |           |           |
| GO:0022625           | 5            | AT2G19730                              | AT3G09500 | AT3G49010 | AT3G53740 | AT5G02870 |           |
| GO:0022626           | 6            | AT1G27390                              | AT2G19730 | AT3G02560 | AT3G49010 | AT3G53740 | AT5G02870 |
| GO:0022627           | 2            | AT3G02560                              | AT3G49080 |           |           |           |           |
| GO:0030148           | 1            | AT5G23670                              |           |           |           |           |           |
| GO:0030163           | 2            | AT1G64520                              | AT5G23540 |           |           |           |           |
| GO:0030173           | 1            | AT2G20370                              |           |           |           |           |           |
| GO:0030244           | 1            | AT5G64740                              |           |           |           |           |           |
| GO:0030276           | 1            | AT4G11380                              |           |           |           |           |           |
| GO:0030581           | 1            | AT1G09270                              |           |           |           |           |           |
| GO:0031072           | 1            | AT1G18700                              |           |           |           |           |           |
| GO:0031540           | 1            | AT1G64520                              |           |           |           |           |           |
| GO:0031897           | 1            | AT5G16620                              |           |           |           |           |           |
| GO:0042254           | 4            | AT2G19730                              | AT3G09500 | AT3G49010 | AT5G08180 |           |           |
| GO:0042353           | 1            | AT2G20370                              |           |           |           |           |           |
| GO:0042626           | 1            | AT2G36380                              |           |           |           |           |           |
| GO:0042742           | 1            | AT5G19510                              |           |           |           |           |           |
| GO:0043161           | 1            | AT1G64520                              |           |           |           |           |           |
| GO:0043622           | 1            | AT5G64740                              |           |           |           |           |           |
| GO:0045037           | 1            | AT5G16620                              |           |           |           |           |           |
| GO:0045281           | 1            | AT5G40650                              |           |           |           |           |           |
| GO:0045309           | 1            | AT2G42590                              |           |           |           |           |           |
| GO:0046500           | 1            | AT5G49810                              |           |           |           |           |           |
| GO:0046512           | 1            | AT5G23670                              |           |           |           |           |           |
| GO:0046520           | 1            | AT1G69640                              |           |           |           |           |           |
| GO:0046686           | 2            | AT1G29880                              | AT2G30110 |           |           |           |           |
| GO:0046719           | 1            | AT5G04430                              |           |           |           |           |           |
| GO:0046872           | 1            | AT1G27390                              |           |           |           |           |           |
| GO:0046907           | 1            | AT3G60600                              |           |           |           |           |           |
| GO:0047769           | 1            | AT3G07630                              |           |           |           |           |           |
| GO:0048046           | 3            | AT3G14067                              | AT4G20830 | AT5G19510 |           |           |           |
| GO:0048194           | 1            | AT1G59820                              |           |           |           |           |           |
| GO:0048364           | 2            | AT1G59820                              | AT5G20520 |           |           |           |           |
| GO:0048366           | 1            | AT1G64520                              |           |           |           |           |           |
| GO:0048367           | 1            | AT1G59820                              |           |           |           |           |           |
| GO:0048528           | 1            | AT1G64520                              |           |           |           |           |           |
| GO:0048825           | 1            | AT1G64520                              |           |           |           |           |           |
| GO:0051301           | 1            | AT1G10270                              |           |           |           |           |           |
| GO:0051707           | 1            | AT2G30110                              |           |           |           |           |           |
| GO:0051788           | 1            | AT1G64520                              |           |           |           |           |           |

# Cluster 24

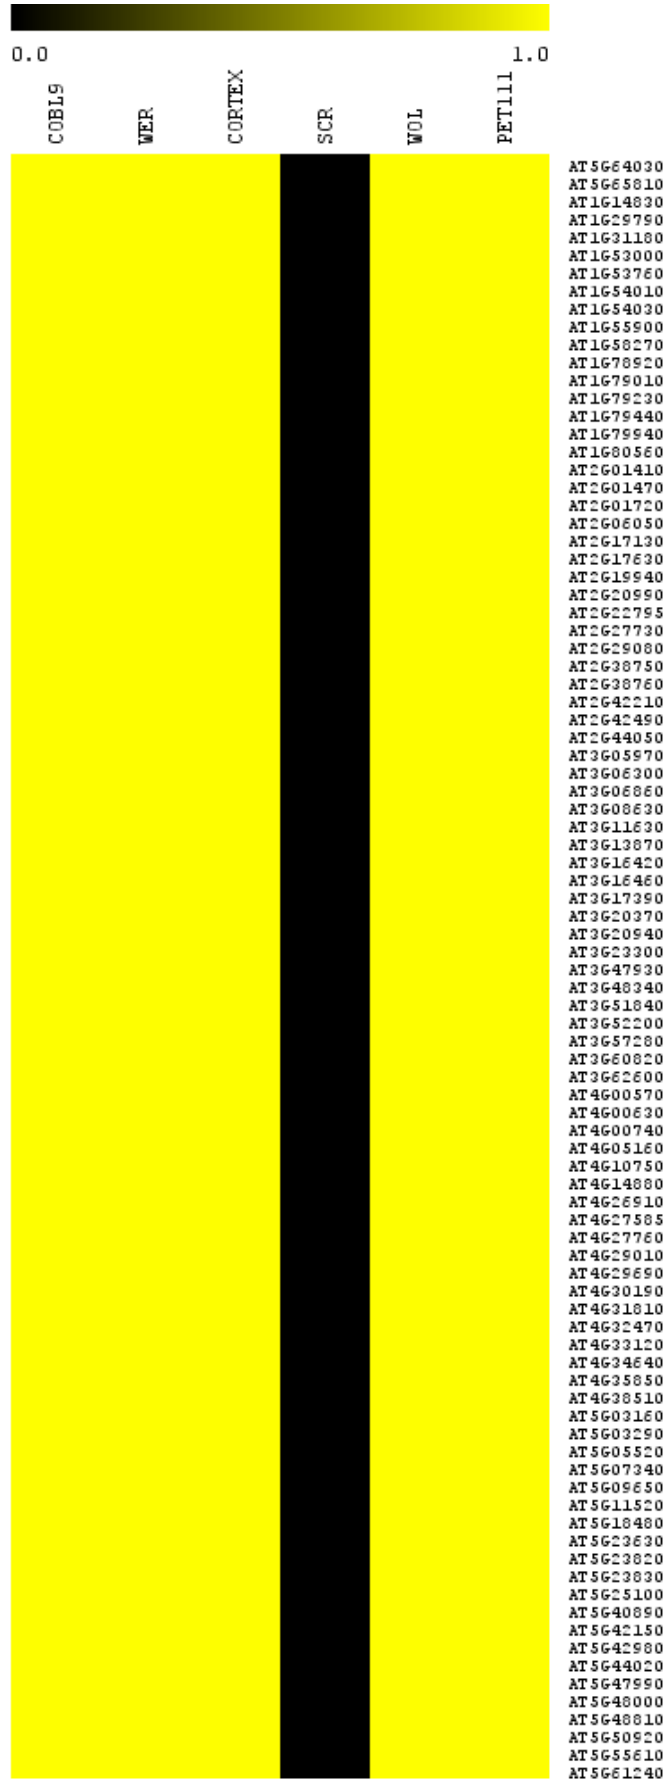

**Cluster 24**

|           |           |           |           |           |
|-----------|-----------|-----------|-----------|-----------|
| AT1G14830 | AT2G01410 | AT3G05970 | AT4G00570 | AT5G03160 |
| AT1G29790 | AT2G01470 | AT3G06300 | AT4G00630 | AT5G03290 |
| AT1G31180 | AT2G01720 | AT3G06860 | AT4G00740 | AT5G05520 |
| AT1G53000 | AT2G06050 | AT3G08630 | AT4G05160 | AT5G07340 |
| AT1G53760 | AT2G17130 | AT3G11630 | AT4G10750 | AT5G09650 |
| AT1G54010 | AT2G17630 | AT3G13870 | AT4G14880 | AT5G11520 |
| AT1G54030 | AT2G19940 | AT3G16420 | AT4G26910 | AT5G18480 |
| AT1G55900 | AT2G20990 | AT3G16460 | AT4G27585 | AT5G23630 |
| AT1G58270 | AT2G22795 | AT3G17390 | AT4G27760 | AT5G23820 |
| AT1G78920 | AT2G27730 | AT3G20370 | AT4G29010 | AT5G23830 |
| AT1G79010 | AT2G29080 | AT3G20940 | AT4G29690 | AT5G25100 |
| AT1G79230 | AT2G38750 | AT3G23300 | AT4G30190 | AT5G40890 |
| AT1G79440 | AT2G38760 | AT3G47930 | AT4G31810 | AT5G42150 |
| AT1G79940 | AT2G42210 | AT3G48340 | AT4G32470 | AT5G42980 |
| AT1G80560 | AT2G42490 | AT3G51840 | AT4G33120 | AT5G44020 |
|           | AT2G44050 | AT3G52200 | AT4G34640 | AT5G47990 |
|           |           | AT3G57280 | AT4G35850 | AT5G48000 |
|           |           | AT3G60820 | AT4G38510 | AT5G48810 |
|           |           | AT3G62600 |           | AT5G50920 |
|           |           |           |           | AT5G55610 |
|           |           |           |           | AT5G61240 |
|           |           |           |           | AT5G64030 |
|           |           |           |           | AT5G65810 |

| Cluster 24<br>GO identifier | Description                                      | #<br>Associated<br>to the GO<br>in Cluster | Total # in<br>Cluster | p-value     |
|-----------------------------|--------------------------------------------------|--------------------------------------------|-----------------------|-------------|
| GO:0005739                  | mitochondrion                                    | 24                                         | 91                    | 1.46E-14    |
| GO:0005783                  | endoplasmic reticulum                            | 11                                         | 91                    | 2.01E-08    |
| GO:0009536                  | plastid                                          | 8                                          | 91                    | 9.56E-08    |
| GO:0016020                  | membrane                                         | 21                                         | 91                    | 1.69E-07    |
| GO:0005777                  | peroxisome                                       | 7                                          | 91                    | 5.31E-07    |
| GO:0005794                  | Golgi apparatus                                  | 7                                          | 91                    | 1.38E-06    |
| GO:0005886                  | plasma membrane                                  | 22                                         | 91                    | 1.55E-06    |
| GO:0006635                  | fatty acid beta-oxidation                        | 4                                          | 91                    | 3.31E-06    |
| GO:0009507                  | chloroplast                                      | 23                                         | 91                    | 8.74E-05    |
| GO:0004300                  | enoyl-CoA hydratase activity                     | 2                                          | 91                    | 1.86E-04    |
| GO:0004449                  | isocitrate dehydrogenase (NAD+) activity         | 2                                          | 91                    | 1.86E-04    |
| GO:0030176                  | integral to endoplasmic reticulum membrane       | 2                                          | 91                    | 2.78E-04    |
| GO:0005788                  | endoplasmic reticulum lumen                      | 2                                          | 91                    | 5.14E-04    |
| GO:0005773                  | vacuole                                          | 8                                          | 91                    | 5.73E-04    |
| GO:0009986                  | cell surface                                     | 2                                          | 91                    | 6.58E-04    |
| GO:0009570                  | chloroplast stroma                               | 7                                          | 91                    | 7.55E-04    |
| GO:0010152                  | pollen maturation                                | 2                                          | 91                    | 8.19E-04    |
| GO:0009941                  | chloroplast envelope                             | 7                                          | 91                    | 9.65E-04    |
| GO:0005544                  | calcium-dependent phospholipid binding           | 2                                          | 91                    | 9.97E-04    |
| GO:0008152                  | metabolic process                                | 8                                          | 91                    | 0.002300053 |
| GO:0006888                  | ER to Golgi vesicle-mediated transport           | 2                                          | 91                    | 0.002690572 |
| GO:0009695                  | jasmonic acid biosynthetic process               | 2                                          | 91                    | 0.002690572 |
| GO:0005789                  | endoplasmic reticulum membrane                   | 2                                          | 91                    | 0.003993272 |
| GO:0000906                  | 6,7-dimethyl-8-ribityllumazine synthase activity | 1                                          | 91                    | 0.004363462 |
| GO:0003857                  | 3-hydroxyacyl-CoA dehydrogenase activity         | 1                                          | 91                    | 0.004363462 |

| Cluster 24<br>GO identifier<br>(con.) | Description                                                                                     | #<br>Associated<br>to the GO<br>in Cluster | Total # in<br>Cluster | p-value     |
|---------------------------------------|-------------------------------------------------------------------------------------------------|--------------------------------------------|-----------------------|-------------|
| GO:0003862                            | 3-isopropylmalate dehydrogenase activity                                                        | 1                                          | 91                    | 0.004363462 |
| GO:0004777                            | succinate-semialdehyde dehydrogenase activity                                                   | 1                                          | 91                    | 0.004363462 |
| GO:0006555                            | methionine metabolic process                                                                    | 1                                          | 91                    | 0.004363462 |
| GO:0009103                            | lipopolysaccharide biosynthetic process                                                         | 1                                          | 91                    | 0.004363462 |
| GO:0015988                            | energy coupled proton transport, against electrochemical gradient                               | 1                                          | 91                    | 0.004363462 |
| GO:0016633                            | galactonolactone dehydrogenase activity                                                         | 1                                          | 91                    | 0.004363462 |
| GO:0016783                            | sulfurtransferase activity                                                                      | 1                                          | 91                    | 0.004363462 |
| GO:0016830                            | carbon-carbon lyase activity                                                                    | 1                                          | 91                    | 0.004363462 |
| GO:0019648                            | formaldehyde assimilation via xylulose monophosphate cycle                                      | 1                                          | 91                    | 0.004363462 |
| GO:0046459                            | short-chain fatty acid metabolic process                                                        | 1                                          | 91                    | 0.004363462 |
| GO:0015992                            | proton transport                                                                                | 2                                          | 91                    | 0.00552284  |
| GO:0005618                            | cell wall                                                                                       | 5                                          | 91                    | 0.008427217 |
| GO:0051082                            | unfolded protein binding                                                                        | 3                                          | 91                    | 0.008614777 |
| GO:0000266                            | mitochondrial fission                                                                           | 1                                          | 91                    | 0.008689261 |
| GO:0004310                            | farnesyl-diphosphate farnesyltransferase activity                                               | 1                                          | 91                    | 0.008689261 |
| GO:0004321                            | fatty-acyl-CoA synthase activity                                                                | 1                                          | 91                    | 0.008689261 |
| GO:0004648                            | O-phospho-L-serine:2-oxoglutarate aminotransferase activity                                     | 1                                          | 91                    | 0.008689261 |
| GO:0004656                            | procollagen-proline 4-dioxygenase activity                                                      | 1                                          | 91                    | 0.008689261 |
| GO:0004792                            | thiosulfate sulfurtransferase activity                                                          | 1                                          | 91                    | 0.008689261 |
| GO:0006535                            | cysteine biosynthetic process from serine                                                       | 1                                          | 91                    | 0.008689261 |
| GO:0006540                            | glutamate decarboxylation to succinate                                                          | 1                                          | 91                    | 0.008689261 |
| GO:0009450                            | gamma-aminobutyric acid catabolic process                                                       | 1                                          | 91                    | 0.008689261 |
| GO:0016620                            | oxidoreductase activity, acting on the aldehyde or oxo group of donors, NAD or NADP as acceptor | 1                                          | 91                    | 0.008689261 |
| GO:0016629                            | 12-oxophytodienoate reductase activity                                                          | 1                                          | 91                    | 0.008689261 |
| GO:0016784                            | 3-mercaptopyruvate sulfurtransferase activity                                                   | 1                                          | 91                    | 0.008689261 |
| GO:0019829                            | cation-transporting ATPase activity                                                             | 1                                          | 91                    | 0.008689261 |
| GO:0006457                            | protein folding                                                                                 | 4                                          | 91                    | 0.010256087 |
| GO:0031072                            | heat shock protein binding                                                                      | 3                                          | 91                    | 0.010264617 |
| GO:0045271                            | respiratory chain complex I                                                                     | 2                                          | 91                    | 0.010796726 |
| GO:0016887                            | ATPase activity                                                                                 | 3                                          | 91                    | 0.01207096  |
| GO:0005938                            | cell cortex                                                                                     | 1                                          | 91                    | 0.012977638 |
| GO:0006090                            | pyruvate metabolic process                                                                      | 1                                          | 91                    | 0.012977638 |
| GO:0009678                            | hydrogen-translocating pyrophosphatase activity                                                 | 1                                          | 91                    | 0.012977638 |
| GO:0051920                            | peroxiredoxin activity                                                                          | 1                                          | 91                    | 0.012977638 |
| GO:0007275                            | multicellular organismal development                                                            | 3                                          | 91                    | 0.015834804 |
| GO:0005730                            | nucleolus                                                                                       | 4                                          | 91                    | 0.016528161 |
| GO:0001676                            | long-chain fatty acid metabolic process                                                         | 1                                          | 91                    | 0.017228833 |
| GO:0003860                            | 3-hydroxyisobutyryl-CoA hydrolase activity                                                      | 1                                          | 91                    | 0.017228833 |
| GO:0004478                            | methionine adenosyltransferase activity                                                         | 1                                          | 91                    | 0.017228833 |
| GO:0004576                            | oligosaccharyl transferase activity                                                             | 1                                          | 91                    | 0.017228833 |
| GO:0006556                            | S-adenosylmethionine biosynthetic process                                                       | 1                                          | 91                    | 0.017228833 |
| GO:0006725                            | cellular aromatic compound metabolic process                                                    | 1                                          | 91                    | 0.017228833 |
| GO:0006885                            | regulation of pH                                                                                | 1                                          | 91                    | 0.017228833 |
| GO:0009098                            | leucine biosynthetic process                                                                    | 1                                          | 91                    | 0.017228833 |
| GO:0019642                            | anaerobic glycolysis                                                                            | 1                                          | 91                    | 0.017228833 |
| GO:0031897                            | Tic complex                                                                                     | 1                                          | 91                    | 0.017228833 |
| GO:0042742                            | defense response to bacterium                                                                   | 3                                          | 91                    | 0.018076859 |
| GO:0003997                            | acyl-CoA oxidase activity                                                                       | 1                                          | 91                    | 0.021443085 |

| Cluster 24<br>GO identifier<br>(con.) | Description                                                                      | #<br>Associated<br>to the GO<br>in Cluster | Total # in<br>Cluster | p-value     |
|---------------------------------------|----------------------------------------------------------------------------------|--------------------------------------------|-----------------------|-------------|
| GO:0004742                            | dihydrolipoyllysine-residue acetyltransferase activity                           | 1                                          | 91                    | 0.021443085 |
| GO:0006086                            | acetyl-CoA biosynthetic process from pyruvate                                    | 1                                          | 91                    | 0.021443085 |
| GO:0016462                            | pyrophosphatase activity                                                         | 1                                          | 91                    | 0.021443085 |
| GO:0004470                            | malic enzyme activity                                                            | 1                                          | 91                    | 0.02562063  |
| GO:0005253                            | anion channel activity                                                           | 1                                          | 91                    | 0.02562063  |
| GO:0006122                            | mitochondrial electron transport, ubiquinol to cytochrome c                      | 1                                          | 91                    | 0.02562063  |
| GO:0006821                            | chloride transport                                                               | 1                                          | 91                    | 0.02562063  |
| GO:0009527                            | plastid outer membrane                                                           | 1                                          | 91                    | 0.02562063  |
| GO:0010073                            | meristem maintenance                                                             | 1                                          | 91                    | 0.02562063  |
| GO:0010188                            | response to microbial phytotoxin                                                 | 1                                          | 91                    | 0.02562063  |
| GO:0016652                            | oxidoreductase activity, acting on NADH or NADPH, NAD or NADP as acceptor        | 1                                          | 91                    | 0.02562063  |
| GO:0019650                            | glucose catabolic process to butanediol                                          | 1                                          | 91                    | 0.02562063  |
| GO:0045037                            | protein import into chloroplast stroma                                           | 1                                          | 91                    | 0.02562063  |
| GO:0046686                            | response to cadmium ion                                                          | 4                                          | 91                    | 0.026070846 |
| GO:0005509                            | calcium ion binding                                                              | 3                                          | 91                    | 0.027649105 |
| GO:0004069                            | L-aspartate:2-oxoglutarate aminotransferase activity                             | 1                                          | 91                    | 0.029761704 |
| GO:0004427                            | inorganic diphosphatase activity                                                 | 1                                          | 91                    | 0.029761704 |
| GO:0004467                            | long-chain-fatty-acid-CoA ligase activity                                        | 1                                          | 91                    | 0.029761704 |
| GO:0005247                            | voltage-gated chloride channel activity                                          | 1                                          | 91                    | 0.029761704 |
| GO:0007005                            | mitochondrion organization                                                       | 1                                          | 91                    | 0.029761704 |
| GO:0008553                            | hydrogen-exporting ATPase activity, phosphorylative mechanism                    | 1                                          | 91                    | 0.029761704 |
| GO:0010380                            | regulation of chlorophyll biosynthetic process                                   | 1                                          | 91                    | 0.029761704 |
| GO:0006812                            | cation transport                                                                 | 2                                          | 91                    | 0.03070788  |
| GO:0048364                            | root development                                                                 | 2                                          | 91                    | 0.032333272 |
| GO:0015386                            | potassium:hydrogen antiporter activity                                           | 1                                          | 91                    | 0.033866541 |
| GO:0004124                            | cysteine synthase activity                                                       | 1                                          | 91                    | 0.037935376 |
| GO:0006094                            | gluconeogenesis                                                                  | 1                                          | 91                    | 0.037935376 |
| GO:0006875                            | cellular metal ion homeostasis                                                   | 1                                          | 91                    | 0.037935376 |
| GO:0008121                            | ubiquinol-cytochrome-c reductase activity                                        | 1                                          | 91                    | 0.037935376 |
| GO:0009932                            | cell tip growth                                                                  | 1                                          | 91                    | 0.037935376 |
| GO:0015035                            | protein disulfide oxidoreductase activity                                        | 1                                          | 91                    | 0.037935376 |
| GO:0009409                            | response to cold                                                                 | 3                                          | 91                    | 0.039917828 |
| GO:0006108                            | malate metabolic process                                                         | 1                                          | 91                    | 0.041968438 |
| GO:0009231                            | riboflavin biosynthetic process                                                  | 1                                          | 91                    | 0.041968438 |
| GO:0010053                            | root epidermal cell differentiation                                              | 1                                          | 91                    | 0.041968438 |
| GO:0018401                            | peptidyl-proline hydroxylation to 4-hydroxy-L-proline                            | 1                                          | 91                    | 0.041968438 |
| GO:0019253                            | reductive pentose-phosphate cycle                                                | 1                                          | 91                    | 0.041968438 |
| GO:0019853                            | L-ascorbic acid biosynthetic process                                             | 1                                          | 91                    | 0.041968438 |
| GO:0051287                            | NAD or NADH binding                                                              | 1                                          | 91                    | 0.041968438 |
| GO:0016209                            | antioxidant activity                                                             | 1                                          | 91                    | 0.04596596  |
| GO:0010167                            | response to nitrate                                                              | 1                                          | 91                    | 0.049928169 |
| GO:0016671                            | oxidoreductase activity, acting on sulfur group of donors, disulfide as acceptor | 1                                          | 91                    | 0.049928169 |
| GO:0019654                            | acetate fermentation                                                             | 1                                          | 91                    | 0.049928169 |
| GO:0006800                            | oxygen and reactive oxygen species metabolic process                             | 1                                          | 91                    | 0.053855294 |
| GO:0016207                            | 4-coumarate-CoA ligase activity                                                  | 1                                          | 91                    | 0.053855294 |
| GO:0004028                            | 3-chloroallyl aldehyde dehydrogenase activity                                    | 1                                          | 91                    | 0.057747562 |
| GO:0005750                            | mitochondrial respiratory chain complex III                                      | 1                                          | 91                    | 0.057747562 |
| GO:0009117                            | nucleotide metabolic process                                                     | 1                                          | 91                    | 0.057747562 |
| GO:0015986                            | ATP synthesis coupled proton transport                                           | 1                                          | 91                    | 0.057747562 |

| Cluster 24<br>GO identifier<br>(con.) | Description                                                                                                                                                                                       | #<br>Associated<br>to the GO<br>in Cluster | Total # in<br>Cluster | p-value     |
|---------------------------------------|---------------------------------------------------------------------------------------------------------------------------------------------------------------------------------------------------|--------------------------------------------|-----------------------|-------------|
| GO:0016779                            | nucleotidyltransferase activity                                                                                                                                                                   | 1                                          | 91                    | 0.061605197 |
| GO:0046933                            | hydrogen ion transporting ATP synthase activity, rotational mechanism                                                                                                                             | 1                                          | 91                    | 0.061605197 |
| GO:0009504                            | cell plate                                                                                                                                                                                        | 1                                          | 91                    | 0.065428425 |
| GO:0009532                            | plastid stroma                                                                                                                                                                                    | 1                                          | 91                    | 0.065428425 |
| GO:0005507                            | copper ion binding                                                                                                                                                                                | 2                                          | 91                    | 0.067094575 |
| GO:0006520                            | amino acid metabolic process                                                                                                                                                                      | 1                                          | 91                    | 0.069217466 |
| GO:0020037                            | heme binding                                                                                                                                                                                      | 1                                          | 91                    | 0.069217466 |
| GO:0006807                            | nitrogen compound metabolic process                                                                                                                                                               | 1                                          | 91                    | 0.072972544 |
| GO:0008483                            | transaminase activity                                                                                                                                                                             | 1                                          | 91                    | 0.072972544 |
| GO:0010193                            | response to ozone                                                                                                                                                                                 | 1                                          | 91                    | 0.076693878 |
| GO:0031966                            | mitochondrial membrane                                                                                                                                                                            | 1                                          | 91                    | 0.076693878 |
| GO:0005744                            | mitochondrial inner membrane presequence translocase complex                                                                                                                                      | 1                                          | 91                    | 0.080381687 |
| GO:0005839                            | proteasome core complex                                                                                                                                                                           | 1                                          | 91                    | 0.080381687 |
| GO:0004872                            | receptor activity                                                                                                                                                                                 | 1                                          | 91                    | 0.084036189 |
| GO:0015079                            | potassium ion transmembrane transporter activity                                                                                                                                                  | 1                                          | 91                    | 0.084036189 |
| GO:0016126                            | sterol biosynthetic process                                                                                                                                                                       | 1                                          | 91                    | 0.087657601 |
| GO:0030163                            | protein catabolic process                                                                                                                                                                         | 1                                          | 91                    | 0.087657601 |
| GO:0009867                            | jasmonic acid mediated signaling pathway                                                                                                                                                          | 1                                          | 91                    | 0.091246138 |
| GO:0010150                            | leaf senescence                                                                                                                                                                                   | 1                                          | 91                    | 0.091246138 |
| GO:0009832                            | plant-type cell wall biogenesis                                                                                                                                                                   | 1                                          | 91                    | 0.094802013 |
| GO:0009846                            | pollen germination                                                                                                                                                                                | 1                                          | 91                    | 0.09832544  |
| GO:0030036                            | actin cytoskeleton organization                                                                                                                                                                   | 1                                          | 91                    | 0.09832544  |
| GO:0009620                            | response to fungus                                                                                                                                                                                | 1                                          | 91                    | 0.108703142 |
| GO:0005759                            | mitochondrial matrix                                                                                                                                                                              | 1                                          | 91                    | 0.11209888  |
| GO:0009853                            | photorespiration                                                                                                                                                                                  | 1                                          | 91                    | 0.11209888  |
| GO:0009809                            | lignin biosynthetic process                                                                                                                                                                       | 1                                          | 91                    | 0.115463216 |
| GO:0006486                            | protein amino acid glycosylation                                                                                                                                                                  | 1                                          | 91                    | 0.118796356 |
| GO:0009706                            | chloroplast inner membrane                                                                                                                                                                        | 1                                          | 91                    | 0.118796356 |
| GO:0010319                            | stromule                                                                                                                                                                                          | 1                                          | 91                    | 0.118796356 |
| GO:0042542                            | response to hydrogen peroxide                                                                                                                                                                     | 1                                          | 91                    | 0.122098504 |
| GO:0003924                            | GTPase activity                                                                                                                                                                                   | 1                                          | 91                    | 0.128610637 |
| GO:0009579                            | thylakoid                                                                                                                                                                                         | 2                                          | 91                    | 0.131482239 |
| GO:0005829                            | cytosol                                                                                                                                                                                           | 2                                          | 91                    | 0.133447563 |
| GO:0003993                            | acid phosphatase activity                                                                                                                                                                         | 1                                          | 91                    | 0.135001227 |
| GO:0009658                            | chloroplast organization                                                                                                                                                                          | 1                                          | 91                    | 0.135001227 |
| GO:0005525                            | GTP binding                                                                                                                                                                                       | 2                                          | 91                    | 0.136381243 |
| GO:0009845                            | seed germination                                                                                                                                                                                  | 1                                          | 91                    | 0.138151443 |
| GO:0016298                            | lipase activity                                                                                                                                                                                   | 1                                          | 91                    | 0.14127187  |
| GO:0019825                            | oxygen binding                                                                                                                                                                                    | 2                                          | 91                    | 0.152632481 |
| GO:0005524                            | ATP binding                                                                                                                                                                                       | 4                                          | 91                    | 0.153029954 |
| GO:0006813                            | potassium ion transport                                                                                                                                                                           | 1                                          | 91                    | 0.153459601 |
| GO:0016706                            | oxidoreductase activity, acting on paired donors, with incorporation or reduction of molecular oxygen, 2-oxoglutarate as one donor, and incorporation of one atom each of oxygen into both donors | 1                                          | 91                    | 0.153459601 |
| GO:0006096                            | glycolysis                                                                                                                                                                                        | 1                                          | 91                    | 0.156434008 |
| GO:0015450                            | P-P-bond-hydrolysis-driven protein transmembrane transporter activity                                                                                                                             | 1                                          | 91                    | 0.156434008 |
| GO:0007568                            | aging                                                                                                                                                                                             | 1                                          | 91                    | 0.162297132 |
| GO:0008233                            | peptidase activity                                                                                                                                                                                | 1                                          | 91                    | 0.165186227 |

| Cluster 24<br>GO identifier<br>(con.) | Description                                   | #<br>Associated<br>to the GO<br>in Cluster | Total # in<br>Cluster | p-value     |
|---------------------------------------|-----------------------------------------------|--------------------------------------------|-----------------------|-------------|
| GO:0045454                            | cell redox homeostasis                        | 1                                          | 91                    | 0.165186227 |
| GO:0016491                            | oxidoreductase activity                       | 2                                          | 91                    | 0.182731953 |
| GO:0050832                            | defense response to fungus                    | 1                                          | 91                    | 0.184634574 |
| GO:0048046                            | apoplast                                      | 2                                          | 91                    | 0.194794276 |
| GO:0006970                            | response to osmotic stress                    | 1                                          | 91                    | 0.195154806 |
| GO:0009535                            | chloroplast thylakoid membrane                | 2                                          | 91                    | 0.200143219 |
| GO:0008415                            | acyltransferase activity                      | 1                                          | 91                    | 0.200257819 |
| GO:0009793                            | embryonic development ending in seed dormancy | 2                                          | 91                    | 0.221577971 |
| GO:0009908                            | flower development                            | 1                                          | 91                    | 0.230980914 |
| GO:0009055                            | electron carrier activity                     | 1                                          | 91                    | 0.235345375 |
| GO:0005743                            | mitochondrial inner membrane                  | 1                                          | 91                    | 0.237492692 |
| GO:0015031                            | protein transport                             | 1                                          | 91                    | 0.253854059 |
| GO:0006950                            | response to stress                            | 1                                          | 91                    | 0.257723069 |
| GO:0009408                            | response to heat                              | 1                                          | 91                    | 0.274085012 |
| GO:0004091                            | carboxylesterase activity                     | 1                                          | 91                    | 0.28567315  |
| GO:0009416                            | response to light stimulus                    | 1                                          | 91                    | 0.294853267 |
| GO:0009611                            | response to wounding                          | 1                                          | 91                    | 0.294853267 |
| GO:0006629                            | lipid metabolic process                       | 1                                          | 91                    | 0.339528849 |
| GO:0016787                            | hydrolase activity                            | 1                                          | 91                    | 0.342007186 |
| GO:0006511                            | ubiquitin-dependent protein catabolic process | 1                                          | 91                    | 0.36472322  |
| GO:0009737                            | response to abscisic acid stimulus            | 1                                          | 91                    | 0.368570465 |
| GO:0000166                            | nucleotide binding                            | 1                                          | 91                    | 0.370301683 |

#### Cluster 24

##### GO Identifier   #Loci   Associated Loci (Left to Right)

|            |   |           |           |
|------------|---|-----------|-----------|
| GO:0000166 | 1 | AT2G01470 |           |
| GO:0000266 | 1 | AT1G14830 |           |
| GO:0000906 | 1 | AT2G44050 |           |
| GO:0001676 | 1 | AT3G05970 |           |
| GO:0003857 | 1 | AT3G06860 |           |
| GO:0003860 | 1 | AT4G31810 |           |
| GO:0003862 | 1 | AT1G80560 |           |
| GO:0003924 | 1 | AT1G14830 |           |
| GO:0003993 | 1 | AT5G44020 |           |
| GO:0003997 | 1 | AT3G51840 |           |
| GO:0004028 | 1 | AT1G79440 |           |
| GO:0004069 | 1 | AT5G11520 |           |
| GO:0004091 | 1 | AT1G54030 |           |
| GO:0004124 | 1 | AT4G14880 |           |
| GO:0004300 | 2 | AT3G06860 | AT4G29010 |
| GO:0004310 | 1 | AT4G34640 |           |
| GO:0004321 | 1 | AT4G05160 |           |
| GO:0004427 | 1 | AT5G09650 |           |
| GO:0004449 | 2 | AT2G17130 | AT5G03290 |
| GO:0004467 | 1 | AT3G05970 |           |
| GO:0004470 | 1 | AT4G00570 |           |
| GO:0004478 | 1 | AT3G17390 |           |
| GO:0004576 | 1 | AT2G01720 |           |
| GO:0004648 | 1 | AT2G17630 |           |
| GO:0004656 | 1 | AT3G06300 |           |
| GO:0004742 | 1 | AT3G52200 |           |
| GO:0004777 | 1 | AT1G79440 |           |
| GO:0004792 | 1 | AT1G79230 |           |
| GO:0004872 | 1 | AT5G55610 |           |



**Cluster 24 (con.)**

| <b>GO Identifier</b> | <b>#Loci</b> | <b>Associated Loci (Left to Right)</b> |           |           |           |           |           |
|----------------------|--------------|----------------------------------------|-----------|-----------|-----------|-----------|-----------|
| GO:0005247           | 1            | AT5G40890                              |           |           |           |           |           |
| GO:0005253           | 1            | AT5G40890                              |           |           |           |           |           |
| GO:0005507           | 2            | AT2G42490                              | AT3G16460 |           |           |           |           |
| GO:0005509           | 3            | AT2G38750                              | AT2G38760 | AT5G07340 |           |           |           |
| GO:0005524           | 4            | AT3G52200                              | AT4G00570 | AT5G03290 | AT5G50920 |           |           |
| GO:0005525           | 2            | AT1G14830                              | AT3G13870 |           |           |           |           |
| GO:0005544           | 2            | AT2G38750                              | AT2G38760 |           |           |           |           |
| GO:0005618           | 5            | AT3G06860                              | AT3G17390 | AT4G29010 | AT5G42980 | AT5G50920 |           |
| GO:0005730           | 4            | AT2G19940                              | AT2G27730 | AT3G06860 | AT3G17390 |           |           |
| GO:0005739           | 24           | AT1G53000                              | AT1G53760 | AT1G55900 | AT1G79230 | AT1G79440 | AT1G79940 |
|                      |              | AT2G17130                              | AT2G27730 | AT2G29080 | AT2G42210 | AT3G47930 | AT3G52200 |
|                      |              | AT4G00570                              | AT4G10750 | AT4G26910 | AT4G31810 | AT4G32470 | AT4G35850 |
|                      |              | AT5G03290                              | AT5G05520 | AT5G42150 | AT5G42980 | AT5G50920 | AT5G55610 |
| GO:0005743           | 1            | AT1G55900                              |           |           |           |           |           |
| GO:0005744           | 1            | AT2G42210                              |           |           |           |           |           |
| GO:0005750           | 1            | AT4G32470                              |           |           |           |           |           |
| GO:0005759           | 1            | AT1G79440                              |           |           |           |           |           |
| GO:0005773           | 8            | AT1G54030                              | AT1G78920 | AT2G27730 | AT2G38760 | AT4G38510 | AT5G23820 |
|                      |              | AT5G42980                              | AT5G44020 |           |           |           |           |
| GO:0005777           | 7            | AT2G06050                              | AT3G06860 | AT3G51840 | AT4G05160 | AT4G14880 | AT4G29010 |
|                      |              | AT5G11520                              |           |           |           |           |           |
| GO:0005783           | 11           | AT1G79940                              | AT2G01470 | AT2G01720 | AT3G13870 | AT4G34640 | AT5G03160 |
|                      |              | AT5G07340                              | AT5G23630 | AT5G47990 | AT5G48000 | AT5G48810 |           |
| GO:0005788           | 2            | AT3G62600                              | AT5G03160 |           |           |           |           |
| GO:0005789           | 2            | AT4G34640                              | AT5G48810 |           |           |           |           |
| GO:0005794           | 7            | AT1G29790                              | AT1G78920 | AT3G23300 | AT4G00740 | AT5G25100 | AT5G61240 |
|                      |              | AT5G64030                              |           |           |           |           |           |
| GO:0005829           | 2            | AT4G14880                              | AT5G42980 |           |           |           |           |
| GO:0005839           | 1            | AT3G60820                              |           |           |           |           |           |
| GO:0005886           | 22           | AT1G14830                              | AT1G29790 | AT1G53760 | AT1G79940 | AT2G01410 | AT2G01470 |
|                      |              | AT2G01720                              | AT3G13870 | AT3G17390 | AT3G23300 | AT3G60820 | AT3G62600 |
|                      |              | AT4G14880                              | AT4G30190 | AT4G32470 | AT4G34640 | AT4G38510 | AT5G03160 |
|                      |              | AT5G07340                              | AT5G23630 | AT5G25100 | AT5G42980 |           |           |
| GO:0005938           | 1            | AT1G14830                              |           |           |           |           |           |
| GO:0006086           | 1            | AT3G52200                              |           |           |           |           |           |
| GO:0006090           | 1            | AT3G52200                              |           |           |           |           |           |
| GO:0006094           | 1            | AT4G10750                              |           |           |           |           |           |
| GO:0006096           | 1            | AT4G10750                              |           |           |           |           |           |
| GO:0006108           | 1            | AT4G00570                              |           |           |           |           |           |
| GO:0006122           | 1            | AT4G32470                              |           |           |           |           |           |
| GO:0006457           | 4            | AT1G79940                              | AT3G62600 | AT5G03160 | AT5G07340 |           |           |
| GO:0006486           | 1            | AT2G01720                              |           |           |           |           |           |
| GO:0006511           | 1            | AT3G60820                              |           |           |           |           |           |
| GO:0006520           | 1            | AT2G19940                              |           |           |           |           |           |
| GO:0006535           | 1            | AT4G14880                              |           |           |           |           |           |
| GO:0006540           | 1            | AT1G79440                              |           |           |           |           |           |
| GO:0006555           | 1            | AT3G17390                              |           |           |           |           |           |
| GO:0006556           | 1            | AT3G17390                              |           |           |           |           |           |
| GO:0006629           | 1            | AT1G54030                              |           |           |           |           |           |
| GO:0006635           | 4            | AT3G06860                              | AT3G51840 | AT4G29010 | AT4G31810 |           |           |
| GO:0006725           | 1            | AT4G10750                              |           |           |           |           |           |
| GO:0006800           | 1            | AT1G79440                              |           |           |           |           |           |
| GO:0006807           | 1            | AT5G11520                              |           |           |           |           |           |
| GO:0006812           | 2            | AT4G00630                              | AT4G30190 |           |           |           |           |
| GO:0006813           | 1            | AT4G00630                              |           |           |           |           |           |
| GO:0006821           | 1            | AT5G40890                              |           |           |           |           |           |
| GO:0006875           | 1            | AT5G23630                              |           |           |           |           |           |
| GO:0006885           | 1            | AT4G00630                              |           |           |           |           |           |
| GO:0006888           | 2            | AT2G01470                              | AT3G13870 |           |           |           |           |

**Cluster 24 (con.)**

| <b>GO Identifier</b> | <b>#Loci</b> | <b>Associated Loci (Left to Right)</b> |           |           |           |           |           |  |
|----------------------|--------------|----------------------------------------|-----------|-----------|-----------|-----------|-----------|--|
| GO:0006950           | 1            | AT1G79440                              |           |           |           |           |           |  |
| GO:0006970           | 1            | AT2G38750                              |           |           |           |           |           |  |
| GO:0007005           | 1            | AT1G14830                              |           |           |           |           |           |  |
| GO:0007275           | 3            | AT4G27760                              | AT4G29010 | AT5G55610 |           |           |           |  |
| GO:0007568           | 1            | AT1G79230                              |           |           |           |           |           |  |
| GO:0008121           | 1            | AT4G32470                              |           |           |           |           |           |  |
| GO:0008152           | 8            | AT1G80560                              | AT2G17130 | AT3G52200 | AT4G00630 | AT4G26910 | AT4G30190 |  |
|                      |              | AT5G03290                              | AT5G09650 |           |           |           |           |  |
| GO:0008233           | 1            | AT3G60820                              |           |           |           |           |           |  |
| GO:0008415           | 1            | AT4G26910                              |           |           |           |           |           |  |
| GO:0008483           | 1            | AT2G17630                              |           |           |           |           |           |  |
| GO:0008553           | 1            | AT4G30190                              |           |           |           |           |           |  |
| GO:0009055           | 1            | AT5G42150                              |           |           |           |           |           |  |
| GO:0009098           | 1            | AT1G80560                              |           |           |           |           |           |  |
| GO:0009103           | 1            | AT1G53000                              |           |           |           |           |           |  |
| GO:0009117           | 1            | AT4G29690                              |           |           |           |           |           |  |
| GO:0009231           | 1            | AT2G44050                              |           |           |           |           |           |  |
| GO:0009408           | 1            | AT1G79440                              |           |           |           |           |           |  |
| GO:0009409           | 3            | AT3G11630                              | AT3G16460 | AT3G17390 |           |           |           |  |
| GO:0009416           | 1            | AT1G79440                              |           |           |           |           |           |  |
| GO:0009450           | 1            | AT1G79440                              |           |           |           |           |           |  |
| GO:0009504           | 1            | AT1G14830                              |           |           |           |           |           |  |
| GO:0009507           | 23           | AT1G79230                              | AT1G79440 | AT1G80560 | AT2G17630 | AT2G19940 | AT2G42210 |  |
|                      |              | AT2G44050                              | AT3G08630 | AT3G11630 | AT3G57280 | AT3G60820 | AT4G00570 |  |
|                      |              | AT4G00630                              | AT4G10750 | AT4G14880 | AT4G29010 | AT5G03290 | AT5G07340 |  |
|                      |              | AT5G09650                              | AT5G42980 | AT5G44020 | AT5G50920 | AT5G55610 |           |  |
| GO:0009527           | 1            | AT2G42210                              |           |           |           |           |           |  |
| GO:0009532           | 1            | AT5G50920                              |           |           |           |           |           |  |
| GO:0009535           | 2            | AT2G29080                              | AT5G50920 |           |           |           |           |  |
| GO:0009536           | 8            | AT1G53000                              | AT1G53760 | AT1G80560 | AT3G47930 | AT4G32470 | AT5G05520 |  |
|                      |              | AT5G11520                              | AT5G55610 |           |           |           |           |  |
| GO:0009570           | 7            | AT1G80560                              | AT2G19940 | AT2G44050 | AT3G11630 | AT5G09650 | AT5G42980 |  |
|                      |              | AT5G50920                              |           |           |           |           |           |  |
| GO:0009579           | 2            | AT3G11630                              | AT5G09650 |           |           |           |           |  |
| GO:0009611           | 1            | AT2G06050                              |           |           |           |           |           |  |
| GO:0009620           | 1            | AT2G06050                              |           |           |           |           |           |  |
| GO:0009658           | 1            | AT5G50920                              |           |           |           |           |           |  |
| GO:0009678           | 1            | AT1G78920                              |           |           |           |           |           |  |
| GO:0009695           | 2            | AT2G06050                              | AT4G05160 |           |           |           |           |  |
| GO:0009706           | 1            | AT3G57280                              |           |           |           |           |           |  |
| GO:0009737           | 1            | AT2G38750                              |           |           |           |           |           |  |
| GO:0009793           | 2            | AT1G55900                              | AT3G51840 |           |           |           |           |  |
| GO:0009809           | 1            | AT3G17390                              |           |           |           |           |           |  |
| GO:0009832           | 1            | AT3G13870                              |           |           |           |           |           |  |
| GO:0009845           | 1            | AT4G29010                              |           |           |           |           |           |  |
| GO:0009846           | 1            | AT5G23630                              |           |           |           |           |           |  |
| GO:0009853           | 1            | AT2G27730                              |           |           |           |           |           |  |
| GO:0009867           | 1            | AT2G44050                              |           |           |           |           |           |  |
| GO:0009908           | 1            | AT4G29010                              |           |           |           |           |           |  |
| GO:0009932           | 1            | AT3G13870                              |           |           |           |           |           |  |
| GO:0009941           | 7            | AT1G80560                              | AT3G11630 | AT3G57280 | AT4G00630 | AT4G38510 | AT5G09650 |  |
|                      |              | AT5G50920                              |           |           |           |           |           |  |
| GO:0009986           | 2            | AT2G38750                              | AT2G38760 |           |           |           |           |  |
| GO:0010053           | 1            | AT3G13870                              |           |           |           |           |           |  |
| GO:0010073           | 1            | AT4G27760                              |           |           |           |           |           |  |
| GO:0010150           | 1            | AT5G11520                              |           |           |           |           |           |  |
| GO:0010152           | 2            | AT1G14830                              | AT5G23630 |           |           |           |           |  |
| GO:0010167           | 1            | AT5G40890                              |           |           |           |           |           |  |
| GO:0010188           | 1            | AT5G42980                              |           |           |           |           |           |  |

**Cluster 24 (con.)**

| <b>GO Identifier</b> | <b>#Loci</b> | <b>Associated Loci (Left to Right)</b> |           |           |           |           |           |
|----------------------|--------------|----------------------------------------|-----------|-----------|-----------|-----------|-----------|
| GO:0010193           | 1            | AT2G06050                              |           |           |           |           |           |
| GO:0010319           | 1            | AT3G11630                              |           |           |           |           |           |
| GO:0010380           | 1            | AT5G50920                              |           |           |           |           |           |
| GO:0015031           | 1            | AT2G42210                              |           |           |           |           |           |
| GO:0015035           | 1            | AT5G42150                              |           |           |           |           |           |
| GO:0015079           | 1            | AT4G00630                              |           |           |           |           |           |
| GO:0015386           | 1            | AT4G00630                              |           |           |           |           |           |
| GO:0015450           | 1            | AT2G42210                              |           |           |           |           |           |
| GO:0015986           | 1            | AT4G38510                              |           |           |           |           |           |
| GO:0015988           | 1            | AT4G38510                              |           |           |           |           |           |
| GO:0015992           | 2            | AT1G78920                              | AT4G30190 |           |           |           |           |
| GO:0016020           | 21           | AT1G14830                              | AT1G53760 | AT2G01470 | AT2G19940 | AT2G42210 | AT3G05970 |
|                      |              | AT3G16460                              | AT3G17390 | AT3G20370 | AT4G00630 | AT4G14880 | AT4G26910 |
|                      |              | AT4G30190                              | AT4G32470 | AT4G38510 | AT5G07340 | AT5G09650 | AT5G11520 |
|                      |              | AT5G42980                              | AT5G44020 | AT5G55610 |           |           |           |
| GO:0016126           | 1            | AT4G34640                              |           |           |           |           |           |
| GO:0016207           | 1            | AT4G05160                              |           |           |           |           |           |
| GO:0016209           | 1            | AT3G11630                              |           |           |           |           |           |
| GO:0016298           | 1            | AT1G54030                              |           |           |           |           |           |
| GO:0016462           | 1            | AT5G09650                              |           |           |           |           |           |
| GO:0016491           | 2            | AT3G51840                              | AT4G27760 |           |           |           |           |
| GO:0016620           | 1            | AT2G19940                              |           |           |           |           |           |
| GO:0016629           | 1            | AT2G06050                              |           |           |           |           |           |
| GO:0016633           | 1            | AT3G47930                              |           |           |           |           |           |
| GO:0016652           | 1            | AT4G00570                              |           |           |           |           |           |
| GO:0016671           | 1            | AT5G42980                              |           |           |           |           |           |
| GO:0016706           | 1            | AT3G06300                              |           |           |           |           |           |
| GO:0016779           | 1            | AT1G53000                              |           |           |           |           |           |
| GO:0016783           | 1            | AT1G79230                              |           |           |           |           |           |
| GO:0016784           | 1            | AT1G79230                              |           |           |           |           |           |
| GO:0016787           | 1            | AT4G29690                              |           |           |           |           |           |
| GO:0016830           | 1            | AT4G10750                              |           |           |           |           |           |
| GO:0016887           | 3            | AT2G29080                              | AT4G30190 | AT5G50920 |           |           |           |
| GO:0018401           | 1            | AT3G06300                              |           |           |           |           |           |
| GO:0019253           | 1            | AT4G10750                              |           |           |           |           |           |
| GO:0019642           | 1            | AT4G10750                              |           |           |           |           |           |
| GO:0019648           | 1            | AT4G10750                              |           |           |           |           |           |
| GO:0019650           | 1            | AT4G10750                              |           |           |           |           |           |
| GO:0019654           | 1            | AT4G10750                              |           |           |           |           |           |
| GO:0019825           | 2            | AT5G47990                              | AT5G48000 |           |           |           |           |
| GO:0019829           | 1            | AT5G23630                              |           |           |           |           |           |
| GO:0019853           | 1            | AT3G47930                              |           |           |           |           |           |
| GO:0020037           | 1            | AT5G48810                              |           |           |           |           |           |
| GO:0030036           | 1            | AT3G13870                              |           |           |           |           |           |
| GO:0030163           | 1            | AT2G29080                              |           |           |           |           |           |
| GO:0030176           | 2            | AT1G79940                              | AT2G01470 |           |           |           |           |
| GO:0031072           | 3            | AT1G79940                              | AT3G62600 | AT5G03160 |           |           |           |
| GO:0031897           | 1            | AT5G50920                              |           |           |           |           |           |
| GO:0031966           | 1            | AT2G27730                              |           |           |           |           |           |
| GO:0042542           | 1            | AT5G42980                              |           |           |           |           |           |
| GO:0042742           | 3            | AT3G11630                              | AT5G09650 | AT5G48810 |           |           |           |
| GO:0045037           | 1            | AT5G50920                              |           |           |           |           |           |
| GO:0045271           | 2            | AT2G27730                              | AT2G42210 |           |           |           |           |
| GO:0045454           | 1            | AT5G42150                              |           |           |           |           |           |
| GO:0046459           | 1            | AT3G51840                              |           |           |           |           |           |
| GO:0046686           | 4            | AT2G17630                              | AT2G19940 | AT4G14880 | AT5G09650 |           |           |
| GO:0046933           | 1            | AT4G38510                              |           |           |           |           |           |
| GO:0048046           | 2            | AT3G11630                              | AT4G14880 |           |           |           |           |
| GO:0048364           | 2            | AT5G47990                              | AT5G48000 |           |           |           |           |



**Cluster 25**

|           |           |           |           |           |
|-----------|-----------|-----------|-----------|-----------|
| AT1G01960 | AT2G04780 | AT3G07290 | AT4G04190 | AT5G01750 |
| AT1G02420 | AT2G20680 | AT3G09410 | AT4G18360 | AT5G03860 |
| AT1G06430 | AT2G25160 | AT3G10730 | AT4G18760 | AT5G07980 |
| AT1G06800 | AT2G39800 | AT3G14840 | AT4G25360 | AT5G07990 |
| AT1G16560 | AT2G40890 | AT3G23160 |           | AT5G11730 |
| AT1G20620 | AT2G41150 | AT3G25585 |           | AT5G14220 |
| AT1G27980 | AT2G48020 | AT3G26950 |           | AT5G20950 |
| AT1G29020 | AT3G05100 | AT3G44190 |           | AT5G22020 |
| AT1G36050 |           | AT3G44310 |           | AT5G22060 |
| AT1G47128 |           | AT3G47960 |           | AT5G43600 |
| AT1G50700 |           | AT3G51550 |           | AT5G43780 |
| AT1G54550 |           | AT3G52850 |           | AT5G44240 |
| AT1G59780 |           | AT3G55610 |           | AT5G48880 |
| AT1G62130 |           | AT3G57420 |           | AT5G59980 |
| AT1G67500 |           | AT3G60100 |           | AT5G60120 |
| AT1G70570 |           | AT3G62580 |           | AT5G61840 |
| AT1G72730 |           |           |           | AT5G63310 |
| AT1G72860 |           |           |           | ATCG00490 |
| AT1G73940 |           |           |           |           |
| AT1G75140 |           |           |           |           |

| Cluster 25<br>GO identifier | Description                                        | #<br>Associated<br>to the GO<br>in Cluster | Total # in<br>Cluster | p-value     |
|-----------------------------|----------------------------------------------------|--------------------------------------------|-----------------------|-------------|
| GO:0009411                  | response to UV                                     | 3                                          | 65                    | 2.26E-05    |
| GO:0016020                  | membrane                                           | 11                                         | 65                    | 0.001832108 |
| GO:0009813                  | flavonoid biosynthetic process                     | 2                                          | 65                    | 0.002890829 |
| GO:0004474                  | malate synthase activity                           | 1                                          | 65                    | 0.003116759 |
| GO:0009940                  | amino-terminal vacuolar sorting propeptide binding | 1                                          | 65                    | 0.003116759 |
| GO:0010483                  | pollen tube reception                              | 1                                          | 65                    | 0.003116759 |
| GO:0016035                  | zeta DNA polymerase complex                        | 1                                          | 65                    | 0.003116759 |
| GO:0016711                  | flavonoid 3'-monooxygenase activity                | 1                                          | 65                    | 0.003116759 |
| GO:0030149                  | sphingolipid catabolic process                     | 1                                          | 65                    | 0.003116759 |
| GO:0043680                  | filiform apparatus                                 | 1                                          | 65                    | 0.003116759 |
| GO:0046409                  | p-coumarate 3-hydroxylase activity                 | 1                                          | 65                    | 0.003116759 |
| GO:0005777                  | peroxisome                                         | 3                                          | 65                    | 0.004643314 |
| GO:0004048                  | anthranilate phosphoribosyltransferase activity    | 1                                          | 65                    | 0.006214387 |
| GO:0004729                  | protoporphyrinogen oxidase activity                | 1                                          | 65                    | 0.006214387 |
| GO:0006097                  | glyoxylate cycle                                   | 1                                          | 65                    | 0.006214387 |
| GO:0007034                  | vacuolar transport                                 | 1                                          | 65                    | 0.006214387 |
| GO:0008891                  | glycolate oxidase activity                         | 1                                          | 65                    | 0.006214387 |
| GO:0005783                  | endoplasmic reticulum                              | 4                                          | 65                    | 0.007994995 |
| GO:0005886                  | plasma membrane                                    | 11                                         | 65                    | 0.008471668 |
| GO:0000213                  | tRNA-intron endonuclease activity                  | 1                                          | 65                    | 0.009292971 |
| GO:0003988                  | acetyl-CoA C-acyltransferase activity              | 1                                          | 65                    | 0.009292971 |
| GO:0004096                  | catalase activity                                  | 1                                          | 65                    | 0.009292971 |
| GO:0009805                  | coumarin biosynthetic process                      | 1                                          | 65                    | 0.009292971 |
| GO:0019395                  | fatty acid oxidation                               | 1                                          | 65                    | 0.009292971 |
| GO:0030572                  | phosphatidyltransferase activity                   | 1                                          | 65                    | 0.009292971 |
| GO:0004781                  | sulfate adenylyltransferase (ATP) activity         | 1                                          | 65                    | 0.012352598 |
| GO:0016831                  | carboxy-lyase activity                             | 1                                          | 65                    | 0.012352598 |
| GO:0004108                  | citrate (S1)-synthase activity                     | 1                                          | 65                    | 0.015393354 |
| GO:0004550                  | nucleoside diphosphate kinase activity             | 1                                          | 65                    | 0.015393354 |

| Cluster 25<br>GO identifier<br>(con.) | Description                                                                           | #<br>Associated<br>to the GO<br>in Cluster | Total # in<br>Cluster | p-value     |
|---------------------------------------|---------------------------------------------------------------------------------------|--------------------------------------------|-----------------------|-------------|
| GO:0006896                            | Golgi to vacuole transport                                                            | 1                                          | 65                    | 0.015393354 |
| GO:0017119                            | Golgi transport complex                                                               | 1                                          | 65                    | 0.015393354 |
| GO:0042744                            | hydrogen peroxide catabolic process                                                   | 1                                          | 65                    | 0.015393354 |
| GO:0010304                            | PSII associated light-harvesting complex II catabolic process                         | 1                                          | 65                    | 0.018415324 |
| GO:0005085                            | guanyl-nucleotide exchange factor activity                                            | 1                                          | 65                    | 0.021418594 |
| GO:0006995                            | cellular response to nitrogen starvation                                              | 1                                          | 65                    | 0.021418594 |
| GO:0009970                            | cellular response to sulfate starvation                                               | 1                                          | 65                    | 0.021418594 |
| GO:0009941                            | chloroplast envelope                                                                  | 4                                          | 65                    | 0.022377523 |
| GO:0010417                            | glucuronoxylan biosynthetic process                                                   | 1                                          | 65                    | 0.024403249 |
| GO:0006099                            | tricarboxylic acid cycle                                                              | 1                                          | 65                    | 0.03031705  |
| GO:0009699                            | phenylpropanoid biosynthetic process                                                  | 1                                          | 65                    | 0.033246365 |
| GO:0015914                            | phospholipid transport                                                                | 1                                          | 65                    | 0.033246365 |
| GO:0000103                            | sulfate assimilation                                                                  | 1                                          | 65                    | 0.036157401 |
| GO:0005802                            | trans-Golgi network                                                                   | 1                                          | 65                    | 0.036157401 |
| GO:0009585                            | red, far-red light phototransduction                                                  | 1                                          | 65                    | 0.039050241 |
| GO:0006779                            | porphyrin biosynthetic process                                                        | 1                                          | 65                    | 0.04192497  |
| GO:0016887                            | ATPase activity                                                                       | 2                                          | 65                    | 0.043861081 |
| GO:0009561                            | megagametogenesis                                                                     | 1                                          | 65                    | 0.044781668 |
| GO:0009834                            | secondary cell wall biogenesis                                                        | 1                                          | 65                    | 0.044781668 |
| GO:0005635                            | nuclear envelope                                                                      | 1                                          | 65                    | 0.050441304 |
| GO:0005887                            | integral to plasma membrane                                                           | 1                                          | 65                    | 0.050441304 |
| GO:0006520                            | amino acid metabolic process                                                          | 1                                          | 65                    | 0.050441304 |
| GO:0006623                            | protein targeting to vacuole                                                          | 1                                          | 65                    | 0.050441304 |
| GO:0009507                            | chloroplast                                                                           | 11                                         | 65                    | 0.051240009 |
| GO:0005794                            | Golgi apparatus                                                                       | 2                                          | 65                    | 0.053040507 |
| GO:0008033                            | tRNA processing                                                                       | 1                                          | 65                    | 0.053244406 |
| GO:0015662                            | ATPase activity, coupled to transmembrane movement of ions, phosphorylative mechanism | 1                                          | 65                    | 0.053244406 |
| GO:0005618                            | cell wall                                                                             | 3                                          | 65                    | 0.053944826 |
| GO:0000162                            | tryptophan biosynthetic process                                                       | 1                                          | 65                    | 0.056029805 |
| GO:0003887                            | DNA-directed DNA polymerase activity                                                  | 1                                          | 65                    | 0.056029805 |
| GO:0046777                            | protein amino acid autophosphorylation                                                | 1                                          | 65                    | 0.056029805 |
| GO:0005739                            | mitochondrion                                                                         | 5                                          | 65                    | 0.059012425 |
| GO:0005819                            | spindle                                                                               | 1                                          | 65                    | 0.064280596 |
| GO:0008654                            | phospholipid biosynthetic process                                                     | 1                                          | 65                    | 0.066995992 |
| GO:0009734                            | auxin mediated signaling pathway                                                      | 1                                          | 65                    | 0.066995992 |
| GO:0005792                            | microsome                                                                             | 1                                          | 65                    | 0.069694087 |
| GO:0016036                            | cellular response to phosphate starvation                                             | 1                                          | 65                    | 0.072374962 |
| GO:0004672                            | protein kinase activity                                                               | 2                                          | 65                    | 0.07386884  |
| GO:0004553                            | hydrolase activity, hydrolyzing O-glycosyl compounds                                  | 2                                          | 65                    | 0.074582129 |
| GO:0009579                            | thylakoid                                                                             | 2                                          | 65                    | 0.082479924 |
| GO:0005524                            | ATP binding                                                                           | 4                                          | 65                    | 0.085325306 |
| GO:0009809                            | lignin biosynthetic process                                                           | 1                                          | 65                    | 0.085523772 |
| GO:0004683                            | calmodulin-dependent protein kinase activity                                          | 1                                          | 65                    | 0.088102969 |
| GO:0010224                            | response to UV-B                                                                      | 1                                          | 65                    | 0.090665492 |
| GO:0042542                            | response to hydrogen peroxide                                                         | 1                                          | 65                    | 0.090665492 |
| GO:0004806                            | triacylglycerol lipase activity                                                       | 1                                          | 65                    | 0.095740824 |
| GO:0019825                            | oxygen binding                                                                        | 2                                          | 65                    | 0.098443729 |
| GO:0009524                            | phragmoplast                                                                          | 1                                          | 65                    | 0.103230677 |
| GO:0008643                            | carbohydrate transport                                                                | 1                                          | 65                    | 0.10569476  |
| GO:0004497                            | monooxygenase activity                                                                | 1                                          | 65                    | 0.108142701 |
| GO:0005773                            | vacuole                                                                               | 3                                          | 65                    | 0.110630464 |

| Cluster 25<br>GO identifier<br>(con.) | Description                                     | #<br>Associated<br>to the GO<br>in Cluster | Total # in<br>Cluster | p-value     |
|---------------------------------------|-------------------------------------------------|--------------------------------------------|-----------------------|-------------|
| GO:0006633                            | fatty acid biosynthetic process                 | 1                                          | 65                    | 0.12715402  |
| GO:0009505                            | plant-type cell wall                            | 2                                          | 65                    | 0.131555494 |
| GO:0048046                            | apoplast                                        | 2                                          | 65                    | 0.133667068 |
| GO:0005515                            | protein binding                                 | 5                                          | 65                    | 0.149000392 |
| GO:0006857                            | oligopeptide transport                          | 1                                          | 65                    | 0.153824663 |
| GO:0046658                            | anchored to plasma membrane                     | 1                                          | 65                    | 0.15595044  |
| GO:0005975                            | carbohydrate metabolic process                  | 2                                          | 65                    | 0.171749221 |
| GO:0008026                            | ATP-dependent helicase activity                 | 1                                          | 65                    | 0.172438039 |
| GO:0009055                            | electron carrier activity                       | 1                                          | 65                    | 0.18421279  |
| GO:0006810                            | transport                                       | 2                                          | 65                    | 0.184558109 |
| GO:0006281                            | DNA repair                                      | 1                                          | 65                    | 0.188027961 |
| GO:0015144                            | carbohydrate transmembrane transporter activity | 1                                          | 65                    | 0.188027961 |
| GO:0006952                            | defense response                                | 2                                          | 65                    | 0.188657615 |
| GO:0005351                            | sugar:hydrogen symporter activity               | 1                                          | 65                    | 0.191789122 |
| GO:0009570                            | chloroplast stroma                              | 2                                          | 65                    | 0.204151046 |
| GO:0004091                            | carboxylesterase activity                       | 1                                          | 65                    | 0.231322669 |
| GO:0031224                            | intrinsic to membrane                           | 1                                          | 65                    | 0.235996738 |
| GO:0004888                            | transmembrane receptor activity                 | 1                                          | 65                    | 0.239053678 |
| GO:0009416                            | response to light stimulus                      | 1                                          | 65                    | 0.240564587 |
| GO:0008152                            | metabolic process                               | 2                                          | 65                    | 0.270162548 |
| GO:0009536                            | plastid                                         | 1                                          | 65                    | 0.272217184 |
| GO:0009414                            | response to water deprivation                   | 1                                          | 65                    | 0.279544474 |
| GO:0006629                            | lipid metabolic process                         | 1                                          | 65                    | 0.290955133 |
| GO:0005509                            | calcium ion binding                             | 1                                          | 65                    | 0.305328862 |
| GO:0022626                            | cytosolic ribosome                              | 1                                          | 65                    | 0.31185084  |
| GO:0009409                            | response to cold                                | 1                                          | 65                    | 0.328940122 |
| GO:0006457                            | protein folding                                 | 1                                          | 65                    | 0.339648499 |
| GO:0031225                            | anchored to membrane                            | 1                                          | 65                    | 0.34025567  |
| GO:0005215                            | transporter activity                            | 1                                          | 65                    | 0.35048923  |
| GO:0016491                            | oxidoreductase activity                         | 1                                          | 65                    | 0.351428008 |
| GO:0009535                            | chloroplast thylakoid membrane                  | 1                                          | 65                    | 0.360144099 |
| GO:0016021                            | integral to membrane                            | 1                                          | 65                    | 0.36111492  |
| GO:0046686                            | response to cadmium ion                         | 1                                          | 65                    | 0.367716977 |
| GO:0009793                            | embryonic development ending in seed dormancy   | 1                                          | 65                    | 0.367891887 |

### Cluster 25

| <u>GO Identifier</u> | <u>#Loci</u> | <u>Associated Loci (Left to Right)</u> |
|----------------------|--------------|----------------------------------------|
| GO:0000103           | 1            | AT5G43780                              |
| GO:0000162           | 1            | AT1G70570                              |
| GO:0000213           | 1            | AT5G59980                              |
| GO:0003887           | 1            | AT1G67500                              |
| GO:0003988           | 1            | AT5G48880                              |
| GO:0004048           | 1            | AT1G70570                              |
| GO:0004091           | 1            | AT3G09410                              |
| GO:0004096           | 1            | AT1G20620                              |
| GO:0004108           | 1            | AT3G60100                              |
| GO:0004474           | 1            | AT5G03860                              |
| GO:0004497           | 1            | AT2G40890                              |
| GO:0004550           | 1            | AT5G63310                              |
| GO:0004553           | 2            | AT2G20680 AT5G20950                    |
| GO:0004672           | 2            | AT3G14840 AT3G51550                    |
| GO:0004683           | 1            | AT1G50700                              |
| GO:0004729           | 1            | AT5G14220                              |
| GO:0004781           | 1            | AT5G43780                              |

**Cluster 25 (con.)**

| <b>GO Identifier</b> | <b>#Loci</b> | <b>Associated Loci (Left to Right)</b> |           |           |           |           |           |
|----------------------|--------------|----------------------------------------|-----------|-----------|-----------|-----------|-----------|
| GO:0004806           | 1            | AT1G06800                              |           |           |           |           |           |
| GO:0004888           | 1            | AT1G72860                              |           |           |           |           |           |
| GO:0005085           | 1            | AT1G01960                              |           |           |           |           |           |
| GO:0005215           | 1            | AT3G47960                              |           |           |           |           |           |
| GO:0005351           | 1            | AT2G48020                              |           |           |           |           |           |
| GO:0005509           | 1            | AT1G29020                              |           |           |           |           |           |
| GO:0005515           | 5            | AT1G59780                              | AT1G72860 | AT3G14840 | AT5G22060 | AT5G63310 |           |
| GO:0005524           | 4            | AT1G59780                              | AT1G72860 | AT3G14840 | AT5G63310 |           |           |
| GO:0005618           | 3            | AT1G20620                              | AT3G57420 | AT5G20950 |           |           |           |
| GO:0005635           | 1            | AT3G10730                              |           |           |           |           |           |
| GO:0005739           | 5            | AT1G20620                              | AT2G40890 | AT3G60100 | AT5G14220 | AT5G43780 |           |
| GO:0005773           | 3            | AT1G20620                              | AT1G47128 | AT2G48020 |           |           |           |
| GO:0005777           | 3            | AT1G20620                              | AT4G18360 | AT5G48880 |           |           |           |
| GO:0005783           | 4            | AT1G27980                              | AT1G75140 | AT2G40890 | AT3G10730 |           |           |
| GO:0005792           | 1            | AT2G40890                              |           |           |           |           |           |
| GO:0005794           | 2            | AT3G52850                              | AT5G61840 |           |           |           |           |
| GO:0005802           | 1            | AT3G52850                              |           |           |           |           |           |
| GO:0005819           | 1            | AT3G10730                              |           |           |           |           |           |
| GO:0005886           | 11           | AT1G20620                              | AT1G36050 | AT1G72730 | AT2G04780 | AT2G40890 | AT2G48020 |
|                      |              | AT3G14840                              | AT3G47960 | AT3G51550 | AT3G52850 | AT5G22060 |           |
| GO:0005887           | 1            | AT3G52850                              |           |           |           |           |           |
| GO:0005975           | 2            | AT2G20680                              | AT5G20950 |           |           |           |           |
| GO:0006097           | 1            | AT5G03860                              |           |           |           |           |           |
| GO:0006099           | 1            | AT3G60100                              |           |           |           |           |           |
| GO:0006281           | 1            | AT1G67500                              |           |           |           |           |           |
| GO:0006457           | 1            | AT5G22060                              |           |           |           |           |           |
| GO:0006520           | 1            | AT1G27980                              |           |           |           |           |           |
| GO:0006623           | 1            | AT3G52850                              |           |           |           |           |           |
| GO:0006629           | 1            | AT1G06800                              |           |           |           |           |           |
| GO:0006633           | 1            | AT1G36050                              |           |           |           |           |           |
| GO:0006779           | 1            | AT5G14220                              |           |           |           |           |           |
| GO:0006810           | 2            | AT2G48020                              | AT5G44240 |           |           |           |           |
| GO:0006857           | 1            | AT3G47960                              |           |           |           |           |           |
| GO:0006896           | 1            | AT3G52850                              |           |           |           |           |           |
| GO:0006952           | 2            | AT1G59780                              | AT1G72860 |           |           |           |           |
| GO:0006995           | 1            | AT1G20620                              |           |           |           |           |           |
| GO:0007034           | 1            | AT3G52850                              |           |           |           |           |           |
| GO:0008026           | 1            | AT1G72730                              |           |           |           |           |           |
| GO:0008033           | 1            | AT5G59980                              |           |           |           |           |           |
| GO:0008152           | 2            | AT4G18360                              | AT5G44240 |           |           |           |           |
| GO:0008643           | 1            | AT2G48020                              |           |           |           |           |           |
| GO:0008654           | 1            | AT3G25585                              |           |           |           |           |           |
| GO:0008891           | 1            | AT4G18360                              |           |           |           |           |           |
| GO:0009055           | 1            | AT3G44190                              |           |           |           |           |           |
| GO:0009409           | 1            | AT1G20620                              |           |           |           |           |           |
| GO:0009411           | 3            | AT1G67500                              | AT5G07990 | AT5G63310 |           |           |           |
| GO:0009414           | 1            | AT1G47128                              |           |           |           |           |           |
| GO:0009416           | 1            | AT1G20620                              |           |           |           |           |           |
| GO:0009505           | 2            | AT1G72730                              | AT5G20950 |           |           |           |           |
| GO:0009507           | 11           | AT1G06430                              | AT1G06800 | AT1G20620 | AT1G47128 | AT1G62130 | AT1G70570 |
|                      |              | AT2G48020                              | AT5G01750 | AT5G14220 | AT5G43780 | AT5G63310 |           |
| GO:0009524           | 1            | AT3G10730                              |           |           |           |           |           |
| GO:0009535           | 1            | AT1G06430                              |           |           |           |           |           |
| GO:0009536           | 1            | AT5G14220                              |           |           |           |           |           |
| GO:0009561           | 1            | AT1G01960                              |           |           |           |           |           |
| GO:0009570           | 2            | AT1G20620                              | AT5G63310 |           |           |           |           |
| GO:0009579           | 2            | AT1G06430                              | AT5G63310 |           |           |           |           |
| GO:0009585           | 1            | AT5G63310                              |           |           |           |           |           |
| GO:0009699           | 1            | AT2G40890                              |           |           |           |           |           |



**Cluster 25 (con.)**

| <b>GO Identifier</b> | <b>#Loci</b> | <b>Associated Loci (Left to Right)</b> |           |           |           |           |           |
|----------------------|--------------|----------------------------------------|-----------|-----------|-----------|-----------|-----------|
| GO:0009734           | 1            | AT5G63310                              |           |           |           |           |           |
| GO:0009793           | 1            | AT5G14220                              |           |           |           |           |           |
| GO:0009805           | 1            | AT2G40890                              |           |           |           |           |           |
| GO:0009809           | 1            | AT2G40890                              |           |           |           |           |           |
| GO:0009813           | 2            | AT2G40890                              | AT5G07990 |           |           |           |           |
| GO:0009834           | 1            | AT5G61840                              |           |           |           |           |           |
| GO:0009940           | 1            | AT3G52850                              |           |           |           |           |           |
| GO:0009941           | 4            | AT1G06430                              | AT1G20620 | AT5G14220 | AT5G63310 |           |           |
| GO:0009970           | 1            | AT1G20620                              |           |           |           |           |           |
| GO:0010224           | 1            | AT1G67500                              |           |           |           |           |           |
| GO:0010304           | 1            | AT1G06430                              |           |           |           |           |           |
| GO:0010417           | 1            | AT5G61840                              |           |           |           |           |           |
| GO:0010483           | 1            | AT3G51550                              |           |           |           |           |           |
| GO:0015144           | 1            | AT2G48020                              |           |           |           |           |           |
| GO:0015662           | 1            | AT5G44240                              |           |           |           |           |           |
| GO:0015914           | 1            | AT5G44240                              |           |           |           |           |           |
| GO:0016020           | 11           | AT1G06430                              | AT1G20620 | AT1G27980 | AT2G04780 | AT2G48020 | AT3G25585 |
|                      |              | AT3G47960                              | AT3G51550 | AT5G20950 | AT5G44240 | AT5G61840 |           |
| GO:0016021           | 1            | AT5G44240                              |           |           |           |           |           |
| GO:0016035           | 1            | AT1G67500                              |           |           |           |           |           |
| GO:0016036           | 1            | AT1G20620                              |           |           |           |           |           |
| GO:0016491           | 1            | AT5G14220                              |           |           |           |           |           |
| GO:0016711           | 1            | AT5G07990                              |           |           |           |           |           |
| GO:0016831           | 1            | AT1G27980                              |           |           |           |           |           |
| GO:0016887           | 2            | AT1G06430                              | AT1G62130 |           |           |           |           |
| GO:0017119           | 1            | AT3G52850                              |           |           |           |           |           |
| GO:0019395           | 1            | AT5G48880                              |           |           |           |           |           |
| GO:0019825           | 2            | AT2G25160                              | AT5G07990 |           |           |           |           |
| GO:0022626           | 1            | AT1G20620                              |           |           |           |           |           |
| GO:0030149           | 1            | AT1G27980                              |           |           |           |           |           |
| GO:0030572           | 1            | AT3G25585                              |           |           |           |           |           |
| GO:0031224           | 1            | AT1G72860                              |           |           |           |           |           |
| GO:0031225           | 1            | AT2G04780                              |           |           |           |           |           |
| GO:0042542           | 1            | AT5G63310                              |           |           |           |           |           |
| GO:0042744           | 1            | AT1G20620                              |           |           |           |           |           |
| GO:0043680           | 1            | AT3G51550                              |           |           |           |           |           |
| GO:0046409           | 1            | AT2G40890                              |           |           |           |           |           |
| GO:0046658           | 1            | AT2G04780                              |           |           |           |           |           |
| GO:0046686           | 1            | AT1G20620                              |           |           |           |           |           |
| GO:0046777           | 1            | AT3G51550                              |           |           |           |           |           |
| GO:0048046           | 2            | AT1G20620                              | AT1G47128 |           |           |           |           |

## Cluster 26

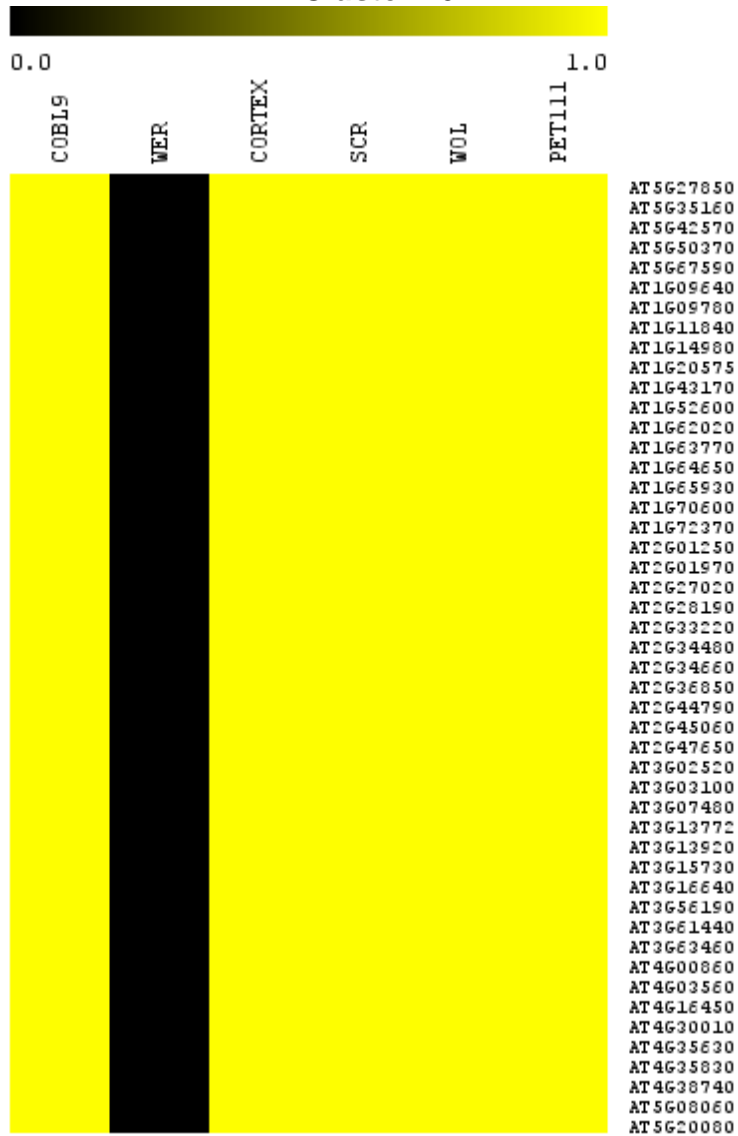

### Cluster 26

|           |           |           |           |           |
|-----------|-----------|-----------|-----------|-----------|
| AT1G09640 | AT2G01250 | AT3G02520 | AT4G00860 | AT5G08060 |
| AT1G09780 | AT2G01970 | AT3G03100 | AT4G03560 | AT5G20080 |
| AT1G11840 | AT2G27020 | AT3G07480 | AT4G16450 | AT5G27850 |
| AT1G14980 | AT2G28190 | AT3G13772 | AT4G30010 | AT5G35160 |
| AT1G20575 | AT2G33220 | AT3G13920 | AT4G35630 | AT5G42570 |
| AT1G43170 | AT2G34480 | AT3G15730 | AT4G35830 | AT5G50370 |
| AT1G52600 | AT2G34660 | AT3G16640 | AT4G38740 | AT5G67590 |
| AT1G62020 | AT2G36850 | AT3G56190 |           |           |
| AT1G63770 | AT2G44790 | AT3G61440 |           |           |
| AT1G64650 | AT2G45060 | AT3G63460 |           |           |
| AT1G65930 | AT2G47650 |           |           |           |
| AT1G70600 |           |           |           |           |
| AT1G72370 |           |           |           |           |

| Cluster 26<br>GO identifier | Description                                                          | #<br>Associated<br>to the GO<br>in Cluster | Total # in<br>Cluster | p-value     |
|-----------------------------|----------------------------------------------------------------------|--------------------------------------------|-----------------------|-------------|
| GO:0005886                  | plasma membrane                                                      | 24                                         | 48                    | 1.83E-14    |
| GO:0005739                  | mitochondrion                                                        | 15                                         | 48                    | 8.98E-11    |
| GO:0046686                  | response to cadmium ion                                              | 9                                          | 48                    | 1.18E-08    |
| GO:0005773                  | vacuole                                                              | 9                                          | 48                    | 6.00E-07    |
| GO:0048046                  | apoplast                                                             | 7                                          | 48                    | 1.17E-06    |
| GO:0045271                  | respiratory chain complex I                                          | 4                                          | 48                    | 1.52E-06    |
| GO:0022626                  | cytosolic ribosome                                                   | 5                                          | 48                    | 3.80E-05    |
| GO:0022625                  | cytosolic large ribosomal subunit                                    | 4                                          | 48                    | 7.90E-05    |
| GO:0016020                  | membrane                                                             | 11                                         | 48                    | 1.41E-04    |
| GO:0009536                  | plastid                                                              | 4                                          | 48                    | 2.15E-04    |
| GO:0003735                  | structural constituent of ribosome                                   | 5                                          | 48                    | 4.34E-04    |
| GO:0006412                  | translation                                                          | 5                                          | 48                    | 5.21E-04    |
| GO:0031966                  | mitochondrial membrane                                               | 2                                          | 48                    | 8.54E-04    |
| GO:0010119                  | regulation of stomatal movement                                      | 2                                          | 48                    | 0.001252881 |
| GO:0000325                  | plant-type vacuole                                                   | 2                                          | 48                    | 0.001851315 |
| GO:0009853                  | photorespiration                                                     | 2                                          | 48                    | 0.001984058 |
| GO:0004582                  | dolichyl-phosphate beta-D-mannosyltransferase activity               | 1                                          | 48                    | 0.002301606 |
| GO:0004686                  | elongation factor-2 kinase activity                                  | 1                                          | 48                    | 0.002301606 |
| GO:0005245                  | voltage-gated calcium channel activity                               | 1                                          | 48                    | 0.002301606 |
| GO:0030136                  | clathrin-coated vesicle                                              | 1                                          | 48                    | 0.002301606 |
| GO:0042256                  | mature ribosome assembly                                             | 1                                          | 48                    | 0.002301606 |
| GO:0050017                  | L-3-cyanoalanine synthase activity                                   | 1                                          | 48                    | 0.002301606 |
| GO:0015934                  | large ribosomal subunit                                              | 2                                          | 48                    | 0.002711372 |
| GO:0005794                  | Golgi apparatus                                                      | 3                                          | 48                    | 0.002979409 |
| GO:0009845                  | seed germination                                                     | 2                                          | 48                    | 0.00319756  |
| GO:0005774                  | vacuolar membrane                                                    | 2                                          | 48                    | 0.003720119 |
| GO:0009651                  | response to salt stress                                              | 4                                          | 48                    | 0.003834041 |
| GO:0001558                  | regulation of cell growth                                            | 1                                          | 48                    | 0.004592838 |
| GO:0004128                  | cytochrome-b5 reductase activity                                     | 1                                          | 48                    | 0.004592838 |
| GO:0004648                  | O-phospho-L-serine:2-oxoglutarate aminotransferase activity          | 1                                          | 48                    | 0.004592838 |
| GO:0019499                  | cyanide metabolic process                                            | 1                                          | 48                    | 0.004592838 |
| GO:0046537                  | 2,3-bisphosphoglycerate-independent phosphoglycerate mutase activity | 1                                          | 48                    | 0.004592838 |
| GO:0051410                  | detoxification of nitrogen compound                                  | 1                                          | 48                    | 0.004592838 |
| GO:0008233                  | peptidase activity                                                   | 2                                          | 48                    | 0.004871211 |
| GO:0003994                  | aconitate hydratase activity                                         | 1                                          | 48                    | 0.00687373  |
| GO:0004450                  | isocitrate dehydrogenase (NADP+) activity                            | 1                                          | 48                    | 0.00687373  |
| GO:0005262                  | calcium channel activity                                             | 1                                          | 48                    | 0.00687373  |
| GO:0006970                  | response to osmotic stress                                           | 2                                          | 48                    | 0.007330857 |
| GO:0009570                  | chloroplast stroma                                                   | 4                                          | 48                    | 0.00753689  |
| GO:0004017                  | adenylate kinase activity                                            | 1                                          | 48                    | 0.009144315 |
| GO:0006564                  | L-serine biosynthetic process                                        | 1                                          | 48                    | 0.009144315 |
| GO:0009507                  | chloroplast                                                          | 11                                         | 48                    | 0.009730916 |
| GO:0048589                  | developmental growth                                                 | 1                                          | 48                    | 0.011404629 |
| GO:0048768                  | root hair cell tip growth                                            | 1                                          | 48                    | 0.011404629 |
| GO:0030126                  | COPI vesicle coat                                                    | 1                                          | 48                    | 0.013654705 |
| GO:0004462                  | lactoylglutathione lyase activity                                    | 1                                          | 48                    | 0.015894577 |
| GO:0008137                  | NADH dehydrogenase (ubiquinone) activity                             | 1                                          | 48                    | 0.015894577 |
| GO:0016021                  | integral to membrane                                                 | 3                                          | 48                    | 0.01738258  |
| GO:0019430                  | removal of superoxide radicals                                       | 1                                          | 48                    | 0.018124279 |
| GO:0046688                  | response to copper ion                                               | 1                                          | 48                    | 0.018124279 |

| Cluster 26<br>GO identifier<br>(con.) | Description                                                           | #<br>Associated<br>to the GO<br>in Cluster | Total # in<br>Cluster | p-value     |
|---------------------------------------|-----------------------------------------------------------------------|--------------------------------------------|-----------------------|-------------|
| GO:0051087                            | chaperone binding                                                     | 1                                          | 48                    | 0.018124279 |
| GO:0005783                            | endoplasmic reticulum                                                 | 3                                          | 48                    | 0.019852204 |
| GO:0000302                            | response to reactive oxygen species                                   | 1                                          | 48                    | 0.020343844 |
| GO:0004124                            | cysteine synthase activity                                            | 1                                          | 48                    | 0.020343844 |
| GO:0004784                            | superoxide dismutase activity                                         | 1                                          | 48                    | 0.020343844 |
| GO:0010039                            | response to iron ion                                                  | 1                                          | 48                    | 0.020343844 |
| GO:0019344                            | cysteine biosynthetic process                                         | 1                                          | 48                    | 0.022553307 |
| GO:0005507                            | copper ion binding                                                    | 2                                          | 48                    | 0.022930492 |
| GO:0009061                            | anaerobic respiration                                                 | 1                                          | 48                    | 0.024752701 |
| GO:0010252                            | auxin homeostasis                                                     | 1                                          | 48                    | 0.024752701 |
| GO:0015935                            | small ribosomal subunit                                               | 1                                          | 48                    | 0.024752701 |
| GO:0000148                            | 1,3-beta-glucan synthase complex                                      | 1                                          | 48                    | 0.026942059 |
| GO:0003843                            | 1,3-beta-glucan synthase activity                                     | 1                                          | 48                    | 0.026942059 |
| GO:0004630                            | phospholipase D activity                                              | 1                                          | 48                    | 0.026942059 |
| GO:0006075                            | 1,3-beta-glucan biosynthetic process                                  | 1                                          | 48                    | 0.026942059 |
| GO:0009789                            | positive regulation of abscisic acid mediated signaling               | 1                                          | 48                    | 0.026942059 |
| GO:0045309                            | protein phosphorylated amino acid binding                             | 1                                          | 48                    | 0.026942059 |
| GO:0005618                            | cell wall                                                             | 3                                          | 48                    | 0.027345074 |
| GO:0006631                            | fatty acid metabolic process                                          | 1                                          | 48                    | 0.029121414 |
| GO:0005740                            | mitochondrial envelope                                                | 1                                          | 48                    | 0.031290801 |
| GO:0006816                            | calcium ion transport                                                 | 1                                          | 48                    | 0.031290801 |
| GO:0009117                            | nucleotide metabolic process                                          | 1                                          | 48                    | 0.031290801 |
| GO:0006915                            | apoptosis                                                             | 1                                          | 48                    | 0.033450252 |
| GO:0005635                            | nuclear envelope                                                      | 1                                          | 48                    | 0.037739478 |
| GO:0051536                            | iron-sulfur cluster binding                                           | 1                                          | 48                    | 0.037739478 |
| GO:0006888                            | ER to Golgi vesicle-mediated transport                                | 1                                          | 48                    | 0.039869319 |
| GO:0009556                            | microsporogenesis                                                     | 1                                          | 48                    | 0.039869319 |
| GO:0009631                            | cold acclimation                                                      | 1                                          | 48                    | 0.039869319 |
| GO:0009695                            | jasmonic acid biosynthetic process                                    | 1                                          | 48                    | 0.039869319 |
| GO:0010193                            | response to ozone                                                     | 1                                          | 48                    | 0.041989355 |
| GO:0005839                            | proteasome core complex                                               | 1                                          | 48                    | 0.04409962  |
| GO:0048527                            | lateral root development                                              | 1                                          | 48                    | 0.048290966 |
| GO:0009579                            | thylakoid                                                             | 2                                          | 48                    | 0.05134179  |
| GO:0006139                            | nucleobase, nucleoside, nucleotide and nucleic acid metabolic process | 1                                          | 48                    | 0.05450551  |
| GO:0005737                            | cytoplasm                                                             | 3                                          | 48                    | 0.057591262 |
| GO:0005840                            | ribosome                                                              | 2                                          | 48                    | 0.058326215 |
| GO:0009409                            | response to cold                                                      | 2                                          | 48                    | 0.060356485 |
| GO:0006486                            | protein amino acid glycosylation                                      | 1                                          | 48                    | 0.066676868 |
| GO:0006457                            | protein folding                                                       | 2                                          | 48                    | 0.068605919 |
| GO:0009860                            | pollen tube growth                                                    | 1                                          | 48                    | 0.086214851 |
| GO:0005730                            | nucleolus                                                             | 2                                          | 48                    | 0.086617653 |
| GO:0009505                            | plant-type cell wall                                                  | 2                                          | 48                    | 0.086617653 |
| GO:0009555                            | pollen development                                                    | 1                                          | 48                    | 0.108464977 |
| GO:0003755                            | peptidyl-prolyl cis-trans isomerase activity                          | 1                                          | 48                    | 0.110261796 |
| GO:0009617                            | response to bacterium                                                 | 1                                          | 48                    | 0.110261796 |
| GO:0006413                            | translational initiation                                              | 1                                          | 48                    | 0.11204993  |
| GO:0046658                            | anchored to plasma membrane                                           | 1                                          | 48                    | 0.120861348 |
| GO:0008026                            | ATP-dependent helicase activity                                       | 1                                          | 48                    | 0.134518584 |
| GO:0048364                            | root development                                                      | 1                                          | 48                    | 0.134518584 |
| GO:0003743                            | translation initiation factor activity                                | 1                                          | 48                    | 0.137849514 |
| GO:0006508                            | proteolysis                                                           | 2                                          | 48                    | 0.13931069  |

| Cluster 26<br>GO identifier<br>(con.) | Description                                                      | #<br>Associated<br>to the GO<br>in Cluster | Total # in<br>Cluster | p-value     |
|---------------------------------------|------------------------------------------------------------------|--------------------------------------------|-----------------------|-------------|
| GO:0009055                            | electron carrier activity                                        | 1                                          | 48                    | 0.144412904 |
| GO:0022627                            | cytosolic small ribosomal subunit                                | 1                                          | 48                    | 0.154015159 |
| GO:0009941                            | chloroplast envelope                                             | 2                                          | 48                    | 0.155973702 |
| GO:0006950                            | response to stress                                               | 1                                          | 48                    | 0.161798232 |
| GO:0042626                            | ATPase activity, coupled to transmembrane movement of substances | 1                                          | 48                    | 0.16485659  |
| GO:0042254                            | ribosome biogenesis                                              | 1                                          | 48                    | 0.173846323 |
| GO:0009408                            | response to heat                                                 | 1                                          | 48                    | 0.175317862 |
| GO:0009416                            | response to light stimulus                                       | 1                                          | 48                    | 0.193768212 |
| GO:0005777                            | peroxisome                                                       | 1                                          | 48                    | 0.19919654  |
| GO:0005634                            | nucleus                                                          | 4                                          | 48                    | 0.204117981 |
| GO:0006886                            | intracellular protein transport                                  | 1                                          | 48                    | 0.205821531 |
| GO:0042742                            | defense response to bacterium                                    | 1                                          | 48                    | 0.228241272 |
| GO:0005829                            | cytosol                                                          | 1                                          | 48                    | 0.268725412 |
| GO:0006511                            | ubiquitin-dependent protein catabolic process                    | 1                                          | 48                    | 0.284932731 |
| GO:0006979                            | response to oxidative stress                                     | 1                                          | 48                    | 0.286623748 |
| GO:0031225                            | anchored to membrane                                             | 1                                          | 48                    | 0.297101232 |
| GO:0005215                            | transporter activity                                             | 1                                          | 48                    | 0.310876666 |
| GO:0016491                            | oxidoreductase activity                                          | 1                                          | 48                    | 0.312224865 |
| GO:0007165                            | signal transduction                                              | 1                                          | 48                    | 0.314864854 |
| GO:0009793                            | embryonic development ending in seed dormancy                    | 1                                          | 48                    | 0.341503363 |
| GO:0016757                            | transferase activity, transferring glycosyl groups               | 1                                          | 48                    | 0.34886951  |
| GO:0005975                            | carbohydrate metabolic process                                   | 1                                          | 48                    | 0.349243879 |
| GO:0006810                            | transport                                                        | 1                                          | 48                    | 0.356301346 |

### Cluster 26

| <u>GO Identifier</u> | <u>#Loci</u> | <u>Associated Loci (Left to Right)</u> |           |           |           |           |
|----------------------|--------------|----------------------------------------|-----------|-----------|-----------|-----------|
| GO:0000148           | 1            | AT2G36850                              |           |           |           |           |
| GO:0000302           | 1            | AT4G00860                              |           |           |           |           |
| GO:0000325           | 2            | AT2G34660                              | AT4G03560 |           |           |           |
| GO:0001558           | 1            | AT3G16640                              |           |           |           |           |
| GO:0003735           | 5            | AT1G43170                              | AT1G72370 | AT2G01250 | AT2G34480 | AT5G27850 |
| GO:0003743           | 1            | AT3G13920                              |           |           |           |           |
| GO:0003755           | 1            | AT4G38740                              |           |           |           |           |
| GO:0003843           | 1            | AT2G36850                              |           |           |           |           |
| GO:0003994           | 1            | AT4G35830                              |           |           |           |           |
| GO:0004017           | 1            | AT5G50370                              |           |           |           |           |
| GO:0004124           | 1            | AT3G61440                              |           |           |           |           |
| GO:0004128           | 1            | AT5G20080                              |           |           |           |           |
| GO:0004450           | 1            | AT1G65930                              |           |           |           |           |
| GO:0004462           | 1            | AT1G11840                              |           |           |           |           |
| GO:0004582           | 1            | AT1G20575                              |           |           |           |           |
| GO:0004630           | 1            | AT3G15730                              |           |           |           |           |
| GO:0004648           | 1            | AT4G35630                              |           |           |           |           |
| GO:0004686           | 1            | AT1G20575                              |           |           |           |           |
| GO:0004784           | 1            | AT2G28190                              |           |           |           |           |
| GO:0005215           | 1            | AT1G62020                              |           |           |           |           |
| GO:0005245           | 1            | AT4G03560                              |           |           |           |           |
| GO:0005262           | 1            | AT4G03560                              |           |           |           |           |
| GO:0005507           | 2            | AT1G65930                              | AT2G44790 |           |           |           |
| GO:0005618           | 3            | AT1G43170                              | AT2G01250 | AT3G13920 |           |           |
| GO:0005634           | 4            | AT1G72370                              | AT2G27020 | AT3G15730 | AT3G16640 |           |
| GO:0005635           | 1            | AT3G02520                              |           |           |           |           |
| GO:0005730           | 2            | AT1G43170                              | AT3G13920 |           |           |           |

**Cluster 26 (con.)**

| <b>GO Identifier</b> | <b>#Loci</b> | <b>Associated Loci (Left to Right)</b> |           |           |           |           |           |
|----------------------|--------------|----------------------------------------|-----------|-----------|-----------|-----------|-----------|
| GO:0005737           | 3            | AT1G72370                              | AT3G02520 | AT3G16640 |           |           |           |
| GO:0005739           | 15           | AT1G14980                              | AT2G33220 | AT2G45060 | AT3G03100 | AT3G07480 | AT3G15730 |
|                      |              | AT3G61440                              | AT4G00860 | AT4G16450 | AT4G30010 | AT4G35830 | AT5G08060 |
|                      |              | AT5G20080                              | AT5G50370 | AT5G67590 |           |           |           |
| GO:0005740           | 1            | AT1G09780                              |           |           |           |           |           |
| GO:0005773           | 9            | AT1G11840                              | AT1G43170 | AT1G63770 | AT2G01250 | AT2G27020 | AT2G34660 |
|                      |              | AT4G03560                              | AT4G35830 | AT5G27850 |           |           |           |
| GO:0005774           | 2            | AT2G34660                              | AT4G03560 |           |           |           |           |
| GO:0005777           | 1            | AT4G00860                              |           |           |           |           |           |
| GO:0005783           | 3            | AT1G20575                              | AT1G52600 | AT5G42570 |           |           |           |
| GO:0005794           | 3            | AT2G01970                              | AT3G13772 | AT5G35160 |           |           |           |
| GO:0005829           | 1            | AT4G38740                              |           |           |           |           |           |
| GO:0005839           | 1            | AT2G27020                              |           |           |           |           |           |
| GO:0005840           | 2            | AT1G43170                              | AT2G34480 |           |           |           |           |
| GO:0005886           | 24           | AT1G09780                              | AT1G11840 | AT1G43170 | AT1G52600 | AT1G62020 | AT1G63770 |
|                      |              | AT1G64650                              | AT1G65930 | AT1G72370 | AT2G01250 | AT2G01970 | AT2G27020 |
|                      |              | AT2G34480                              | AT2G34660 | AT2G36850 | AT3G02520 | AT3G13772 | AT3G15730 |
|                      |              | AT3G16640                              | AT4G03560 | AT4G35830 | AT4G38740 | AT5G42570 | AT5G50370 |
| GO:0005975           | 1            | AT1G11840                              |           |           |           |           |           |
| GO:0006075           | 1            | AT2G36850                              |           |           |           |           |           |
| GO:0006139           | 1            | AT5G50370                              |           |           |           |           |           |
| GO:0006412           | 5            | AT1G43170                              | AT1G72370 | AT2G01250 | AT2G34480 | AT5G27850 |           |
| GO:0006413           | 1            | AT3G13920                              |           |           |           |           |           |
| GO:0006457           | 2            | AT1G14980                              | AT4G38740 |           |           |           |           |
| GO:0006486           | 1            | AT1G20575                              |           |           |           |           |           |
| GO:0006508           | 2            | AT1G52600                              | AT1G63770 |           |           |           |           |
| GO:0006511           | 1            | AT2G27020                              |           |           |           |           |           |
| GO:0006564           | 1            | AT4G35630                              |           |           |           |           |           |
| GO:0006631           | 1            | AT3G15730                              |           |           |           |           |           |
| GO:0006810           | 1            | AT2G01970                              |           |           |           |           |           |
| GO:0006816           | 1            | AT4G03560                              |           |           |           |           |           |
| GO:0006886           | 1            | AT5G42570                              |           |           |           |           |           |
| GO:0006888           | 1            | AT1G62020                              |           |           |           |           |           |
| GO:0006915           | 1            | AT5G42570                              |           |           |           |           |           |
| GO:0006950           | 1            | AT2G28190                              |           |           |           |           |           |
| GO:0006970           | 2            | AT1G72370                              | AT5G67590 |           |           |           |           |
| GO:0006979           | 1            | AT2G28190                              |           |           |           |           |           |
| GO:0007165           | 1            | AT4G38740                              |           |           |           |           |           |
| GO:0008026           | 1            | AT3G13920                              |           |           |           |           |           |
| GO:0008137           | 1            | AT5G67590                              |           |           |           |           |           |
| GO:0008233           | 2            | AT1G52600                              | AT2G27020 |           |           |           |           |
| GO:0009055           | 1            | AT3G07480                              |           |           |           |           |           |
| GO:0009061           | 1            | AT5G50370                              |           |           |           |           |           |
| GO:0009117           | 1            | AT5G50370                              |           |           |           |           |           |
| GO:0009408           | 1            | AT1G14980                              |           |           |           |           |           |
| GO:0009409           | 2            | AT1G09780                              | AT2G27020 |           |           |           |           |
| GO:0009416           | 1            | AT2G28190                              |           |           |           |           |           |
| GO:0009505           | 2            | AT2G01970                              | AT5G20080 |           |           |           |           |
| GO:0009507           | 11           | AT1G09780                              | AT1G63770 | AT1G72370 | AT2G01250 | AT2G28190 | AT3G02520 |
|                      |              | AT3G07480                              | AT3G15730 | AT3G16640 | AT3G61440 | AT4G35630 |           |
| GO:0009536           | 4            | AT2G33220                              | AT4G00860 | AT4G30010 | AT5G50370 |           |           |
| GO:0009555           | 1            | AT2G36850                              |           |           |           |           |           |
| GO:0009556           | 1            | AT2G36850                              |           |           |           |           |           |
| GO:0009570           | 4            | AT1G63770                              | AT2G28190 | AT3G02520 | AT4G35630 |           |           |
| GO:0009579           | 2            | AT2G28190                              | AT3G16640 |           |           |           |           |
| GO:0009617           | 1            | AT4G00860                              |           |           |           |           |           |
| GO:0009631           | 1            | AT5G67590                              |           |           |           |           |           |
| GO:0009651           | 4            | AT1G65930                              | AT1G72370 | AT4G35830 | AT5G20080 |           |           |
| GO:0009695           | 1            | AT4G03560                              |           |           |           |           |           |

**Cluster 26**

| <b>GO Identifier</b> | <b>#Loci</b> | <b>Associated Loci (Left to Right)</b> |           |           |           |           |           |  |
|----------------------|--------------|----------------------------------------|-----------|-----------|-----------|-----------|-----------|--|
| GO:0009789           | 1            | AT3G15730                              |           |           |           |           |           |  |
| GO:0009793           | 1            | AT1G43170                              |           |           |           |           |           |  |
| GO:0009845           | 2            | AT3G15730                              | AT4G03560 |           |           |           |           |  |
| GO:0009853           | 2            | AT2G33220                              | AT4G16450 |           |           |           |           |  |
| GO:0009860           | 1            | AT3G16640                              |           |           |           |           |           |  |
| GO:0009941           | 2            | AT1G11840                              | AT1G63770 |           |           |           |           |  |
| GO:0010039           | 1            | AT2G28190                              |           |           |           |           |           |  |
| GO:0010119           | 2            | AT3G15730                              | AT4G03560 |           |           |           |           |  |
| GO:0010193           | 1            | AT4G00860                              |           |           |           |           |           |  |
| GO:0010252           | 1            | AT3G16640                              |           |           |           |           |           |  |
| GO:0015934           | 2            | AT2G01250                              | AT5G27850 |           |           |           |           |  |
| GO:0015935           | 1            | AT1G72370                              |           |           |           |           |           |  |
| GO:0016020           | 11           | AT1G43170                              | AT1G52600 | AT1G62020 | AT1G72370 | AT2G01250 | AT3G13920 |  |
|                      |              | AT3G15730                              | AT3G63460 | AT4G00860 | AT4G16450 | AT5G27850 |           |  |
| GO:0016021           | 3            | AT2G01970                              | AT3G13772 | AT5G35160 |           |           |           |  |
| GO:0016491           | 1            | AT3G03100                              |           |           |           |           |           |  |
| GO:0016757           | 1            | AT2G36850                              |           |           |           |           |           |  |
| GO:0019344           | 1            | AT3G61440                              |           |           |           |           |           |  |
| GO:0019430           | 1            | AT2G28190                              |           |           |           |           |           |  |
| GO:0019499           | 1            | AT3G61440                              |           |           |           |           |           |  |
| GO:0022625           | 4            | AT1G43170                              | AT2G01250 | AT2G34480 | AT5G27850 |           |           |  |
| GO:0022626           | 5            | AT1G43170                              | AT1G72370 | AT2G01250 | AT2G34480 | AT5G27850 |           |  |
| GO:0022627           | 1            | AT1G72370                              |           |           |           |           |           |  |
| GO:0030126           | 1            | AT1G62020                              |           |           |           |           |           |  |
| GO:0030136           | 1            | AT3G15730                              |           |           |           |           |           |  |
| GO:0031225           | 1            | AT2G44790                              |           |           |           |           |           |  |
| GO:0031966           | 2            | AT2G33220                              | AT4G16450 |           |           |           |           |  |
| GO:0042254           | 1            | AT2G34480                              |           |           |           |           |           |  |
| GO:0042256           | 1            | AT1G72370                              |           |           |           |           |           |  |
| GO:0042626           | 1            | AT2G34660                              |           |           |           |           |           |  |
| GO:0042742           | 1            | AT3G16640                              |           |           |           |           |           |  |
| GO:0045271           | 4            | AT2G33220                              | AT3G03100 | AT4G16450 | AT5G67590 |           |           |  |
| GO:0045309           | 1            | AT3G02520                              |           |           |           |           |           |  |
| GO:0046537           | 1            | AT1G09780                              |           |           |           |           |           |  |
| GO:0046658           | 1            | AT2G44790                              |           |           |           |           |           |  |
| GO:0046686           | 9            | AT1G09780                              | AT1G11840 | AT1G63770 | AT1G65930 | AT2G27020 | AT3G13920 |  |
|                      |              | AT3G15730                              | AT3G16640 | AT4G38740 |           |           |           |  |
| GO:0046688           | 1            | AT2G28190                              |           |           |           |           |           |  |
| GO:0048046           | 7            | AT1G63770                              | AT1G65930 | AT2G27020 | AT2G28190 | AT3G16640 | AT4G35830 |  |
|                      |              | AT4G38740                              |           |           |           |           |           |  |
| GO:0048364           | 1            | AT3G16640                              |           |           |           |           |           |  |
| GO:0048527           | 1            | AT3G16640                              |           |           |           |           |           |  |
| GO:0048589           | 1            | AT2G36850                              |           |           |           |           |           |  |
| GO:0048768           | 1            | AT3G16640                              |           |           |           |           |           |  |
| GO:0050017           | 1            | AT3G61440                              |           |           |           |           |           |  |
| GO:0051087           | 1            | AT1G14980                              |           |           |           |           |           |  |
| GO:0051410           | 1            | AT3G61440                              |           |           |           |           |           |  |
| GO:0051536           | 1            | AT3G07480                              |           |           |           |           |           |  |

## Cluster 27

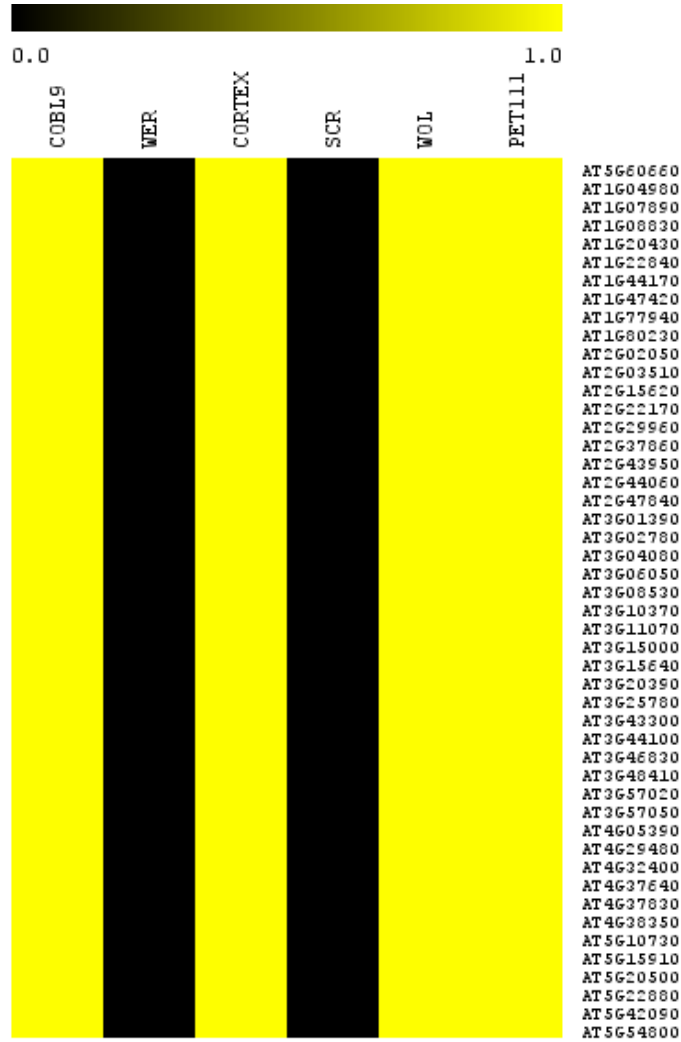

### Cluster 27

|           |           |           |           |           |
|-----------|-----------|-----------|-----------|-----------|
| AT1G04980 | AT2G02050 | AT3G01390 | AT4G05390 | AT5G10730 |
| AT1G07890 | AT2G03510 | AT3G02780 | AT4G29480 | AT5G15910 |
| AT1G08830 | AT2G15620 | AT3G04080 | AT4G32400 | AT5G20500 |
| AT1G20430 | AT2G22170 | AT3G06050 | AT4G37640 | AT5G22880 |
| AT1G22840 | AT2G29960 | AT3G08530 | AT4G37830 | AT5G42090 |
| AT1G44170 | AT2G37860 | AT3G10370 | AT4G38350 | AT5G54800 |
| AT1G47420 | AT2G43950 | AT3G11070 |           | AT5G60660 |
| AT1G77940 | AT2G44060 | AT3G15000 |           |           |
| AT1G80230 | AT2G47840 | AT3G15640 |           |           |
|           |           | AT3G20390 |           |           |
|           |           | AT3G25780 |           |           |
|           |           | AT3G43300 |           |           |
|           |           | AT3G44100 |           |           |
|           |           | AT3G46830 |           |           |
|           |           | AT3G48410 |           |           |
|           |           | AT3G57020 |           |           |
|           |           | AT3G57050 |           |           |



| Cluster 27<br>GO identifier | Description                                                           | #<br>Associated<br>to the GO<br>in Cluster | Total # in<br>Cluster | p-value     |
|-----------------------------|-----------------------------------------------------------------------|--------------------------------------------|-----------------------|-------------|
| GO:0005739                  | mitochondrion                                                         | 18                                         | 48                    | 3.18E-14    |
| GO:0009536                  | plastid                                                               | 6                                          | 48                    | 4.99E-07    |
| GO:0004129                  | cytochrome-c oxidase activity                                         | 3                                          | 48                    | 6.34E-07    |
| GO:0005783                  | endoplasmic reticulum                                                 | 5                                          | 48                    | 3.18E-04    |
| GO:0005773                  | vacuole                                                               | 6                                          | 48                    | 4.48E-04    |
| GO:0005740                  | mitochondrial envelope                                                | 2                                          | 48                    | 4.60E-04    |
| GO:0044237                  | cellular metabolic process                                            | 2                                          | 48                    | 4.60E-04    |
| GO:0009269                  | response to desiccation                                               | 2                                          | 48                    | 5.29E-04    |
| GO:0046933                  | hydrogen ion transporting ATP synthase activity, rotational mechanism | 2                                          | 48                    | 5.29E-04    |
| GO:0050662                  | coenzyme binding                                                      | 2                                          | 48                    | 5.29E-04    |
| GO:0016020                  | membrane                                                              | 10                                         | 48                    | 6.02E-04    |
| GO:0005829                  | cytosol                                                               | 4                                          | 48                    | 6.09E-04    |
| GO:0004368                  | glycerol-3-phosphate dehydrogenase activity                           | 1                                          | 48                    | 0.002301606 |
| GO:0006127                  | glycerophosphate shuttle                                              | 1                                          | 48                    | 0.002301606 |
| GO:0006862                  | nucleotide transport                                                  | 1                                          | 48                    | 0.002301606 |
| GO:0015215                  | nucleotide transmembrane transporter activity                         | 1                                          | 48                    | 0.002301606 |
| GO:0019279                  | methionine biosynthetic process from L-homoserine via cystathionine   | 1                                          | 48                    | 0.002301606 |
| GO:0047889                  | ferredoxin-nitrate reductase activity                                 | 1                                          | 48                    | 0.002301606 |
| GO:0050421                  | nitrite reductase (NO-forming) activity                               | 1                                          | 48                    | 0.002301606 |
| GO:0005886                  | plasma membrane                                                       | 10                                         | 48                    | 0.002933328 |
| GO:0046686                  | response to cadmium ion                                               | 4                                          | 48                    | 0.003358253 |
| GO:0009507                  | chloroplast                                                           | 12                                         | 48                    | 0.003779682 |
| GO:0009651                  | response to salt stress                                               | 4                                          | 48                    | 0.003834041 |
| GO:0004121                  | cystathionine beta-lyase activity                                     | 1                                          | 48                    | 0.004592838 |
| GO:0004452                  | isopentenyl-diphosphate delta-isomerase activity                      | 1                                          | 48                    | 0.004592838 |
| GO:0004551                  | nucleotide diphosphatase activity                                     | 1                                          | 48                    | 0.004592838 |
| GO:0005624                  | membrane fraction                                                     | 1                                          | 48                    | 0.004592838 |
| GO:0008158                  | hedgehog receptor activity                                            | 1                                          | 48                    | 0.004592838 |
| GO:0015085                  | calcium ion transmembrane transporter activity                        | 1                                          | 48                    | 0.004592838 |
| GO:0019563                  | glycerol catabolic process                                            | 1                                          | 48                    | 0.004592838 |
| GO:0046423                  | allene-oxide cyclase activity                                         | 1                                          | 48                    | 0.004592838 |
| GO:0015152                  | glucose-6-phosphate transmembrane transporter activity                | 1                                          | 48                    | 0.00687373  |
| GO:0015991                  | ATP hydrolysis coupled proton transport                               | 1                                          | 48                    | 0.00687373  |
| GO:0005743                  | mitochondrial inner membrane                                          | 2                                          | 48                    | 0.012248099 |
| GO:0004029                  | aldehyde dehydrogenase (NAD) activity                                 | 1                                          | 48                    | 0.013654705 |
| GO:0005771                  | multivesicular body                                                   | 1                                          | 48                    | 0.013654705 |
| GO:0006120                  | mitochondrial electron transport, NADH to ubiquinone                  | 1                                          | 48                    | 0.013654705 |
| GO:0005085                  | guanyl-nucleotide exchange factor activity                            | 1                                          | 48                    | 0.015894577 |
| GO:0008137                  | NADH dehydrogenase (ubiquinone) activity                              | 1                                          | 48                    | 0.015894577 |
| GO:0016469                  | proton-transporting two-sector ATPase complex                         | 1                                          | 48                    | 0.015894577 |
| GO:0016688                  | L-ascorbate peroxidase activity                                       | 1                                          | 48                    | 0.018124279 |
| GO:0019430                  | removal of superoxide radicals                                        | 1                                          | 48                    | 0.018124279 |
| GO:0046688                  | response to copper ion                                                | 1                                          | 48                    | 0.018124279 |
| GO:0000302                  | response to reactive oxygen species                                   | 1                                          | 48                    | 0.020343844 |
| GO:0004784                  | superoxide dismutase activity                                         | 1                                          | 48                    | 0.020343844 |
| GO:0010039                  | response to iron ion                                                  | 1                                          | 48                    | 0.020343844 |
| GO:0042651                  | thylakoid membrane                                                    | 1                                          | 48                    | 0.020343844 |
| GO:0004521                  | endoribonuclease activity                                             | 1                                          | 48                    | 0.022553307 |
| GO:0016209                  | antioxidant activity                                                  | 1                                          | 48                    | 0.024752701 |
| GO:0009821                  | alkaloid biosynthetic process                                         | 1                                          | 48                    | 0.026942059 |

| Cluster 27<br>GO identifier<br>(con.) | Description                                               | #<br>Associated<br>to the GO<br>in Cluster | Total # in<br>Cluster | p-value     |
|---------------------------------------|-----------------------------------------------------------|--------------------------------------------|-----------------------|-------------|
| GO:0005388                            | calcium-transporting ATPase activity                      | 1                                          | 48                    | 0.029121414 |
| GO:0008794                            | arsenate reductase (glutaredoxin) activity                | 1                                          | 48                    | 0.029121414 |
| GO:0006810                            | transport                                                 | 3                                          | 48                    | 0.030825006 |
| GO:0004028                            | 3-chloroallyl aldehyde dehydrogenase activity             | 1                                          | 48                    | 0.031290801 |
| GO:0016844                            | strictosidine synthase activity                           | 1                                          | 48                    | 0.031290801 |
| GO:0003756                            | protein disulfide isomerase activity                      | 1                                          | 48                    | 0.033450252 |
| GO:0006071                            | glycerol metabolic process                                | 1                                          | 48                    | 0.033450252 |
| GO:0042742                            | defense response to bacterium                             | 2                                          | 48                    | 0.034503898 |
| GO:0005768                            | endosome                                                  | 1                                          | 48                    | 0.0355998   |
| GO:0005795                            | Golgi stack                                               | 1                                          | 48                    | 0.0355998   |
| GO:0009504                            | cell plate                                                | 1                                          | 48                    | 0.0355998   |
| GO:0005216                            | ion channel activity                                      | 1                                          | 48                    | 0.037739478 |
| GO:0046961                            | proton-transporting ATPase activity, rotational mechanism | 1                                          | 48                    | 0.037739478 |
| GO:0009695                            | jasmonic acid biosynthetic process                        | 1                                          | 48                    | 0.039869319 |
| GO:0005516                            | calmodulin binding                                        | 2                                          | 48                    | 0.041758085 |
| GO:0008299                            | isoprenoid biosynthetic process                           | 1                                          | 48                    | 0.041989355 |
| GO:0010193                            | response to ozone                                         | 1                                          | 48                    | 0.041989355 |
| GO:0031966                            | mitochondrial membrane                                    | 1                                          | 48                    | 0.041989355 |
| GO:0005789                            | endoplasmic reticulum membrane                            | 1                                          | 48                    | 0.048290966 |
| GO:0009579                            | thylakoid                                                 | 2                                          | 48                    | 0.05134179  |
| GO:0009846                            | pollen germination                                        | 1                                          | 48                    | 0.05450551  |
| GO:0008283                            | cell proliferation                                        | 1                                          | 48                    | 0.056557827 |
| GO:0015992                            | proton transport                                          | 1                                          | 48                    | 0.056557827 |
| GO:0015995                            | chlorophyll biosynthetic process                          | 1                                          | 48                    | 0.056557827 |
| GO:0000325                            | plant-type vacuole                                        | 1                                          | 48                    | 0.060633857 |
| GO:0009620                            | response to fungus                                        | 1                                          | 48                    | 0.060633857 |
| GO:0015250                            | water channel activity                                    | 1                                          | 48                    | 0.060633857 |
| GO:0006979                            | response to oxidative stress                              | 2                                          | 48                    | 0.06240048  |
| GO:0005759                            | mitochondrial matrix                                      | 1                                          | 48                    | 0.062657633 |
| GO:0009853                            | photorespiration                                          | 1                                          | 48                    | 0.062657633 |
| GO:0005488                            | binding                                                   | 3                                          | 48                    | 0.063008625 |
| GO:0009706                            | chloroplast inner membrane                                | 1                                          | 48                    | 0.066676868 |
| GO:0045271                            | respiratory chain complex I                               | 1                                          | 48                    | 0.078510298 |
| GO:0005730                            | nucleolus                                                 | 2                                          | 48                    | 0.086617653 |
| GO:0006839                            | mitochondrial transport                                   | 1                                          | 48                    | 0.088118222 |
| GO:0015297                            | antiporter activity                                       | 1                                          | 48                    | 0.091897859 |
| GO:0016021                            | integral to membrane                                      | 2                                          | 48                    | 0.093600958 |
| GO:0006334                            | nucleosome assembly                                       | 1                                          | 48                    | 0.10302211  |
| GO:0009624                            | response to nematode                                      | 1                                          | 48                    | 0.106659442 |
| GO:0009793                            | embryonic development ending in seed dormancy             | 2                                          | 48                    | 0.108672259 |
| GO:0003755                            | peptidyl-prolyl cis-trans isomerase activity              | 1                                          | 48                    | 0.110261796 |
| GO:0005618                            | cell wall                                                 | 2                                          | 48                    | 0.121500526 |
| GO:0007264                            | small GTPase mediated signal transduction                 | 1                                          | 48                    | 0.124326141 |
| GO:0004601                            | peroxidase activity                                       | 1                                          | 48                    | 0.131154531 |
| GO:0006812                            | cation transport                                          | 1                                          | 48                    | 0.131154531 |
| GO:0009908                            | flower development                                        | 1                                          | 48                    | 0.141147546 |
| GO:0009055                            | electron carrier activity                                 | 1                                          | 48                    | 0.144412904 |
| GO:0048366                            | leaf development                                          | 1                                          | 48                    | 0.1460334   |
| GO:0009570                            | chloroplast stroma                                        | 2                                          | 48                    | 0.14798441  |
| GO:0046872                            | metal ion binding                                         | 1                                          | 48                    | 0.152434812 |
| GO:0003824                            | catalytic activity                                        | 2                                          | 48                    | 0.155973702 |
| GO:0009941                            | chloroplast envelope                                      | 2                                          | 48                    | 0.155973702 |

| Cluster 27<br>GO identifier<br>(con.) | Description                        | #<br>Associated<br>to the GO<br>in Cluster | Total # in<br>Cluster | p-value     |
|---------------------------------------|------------------------------------|--------------------------------------------|-----------------------|-------------|
| GO:0015031                            | protein transport                  | 1                                          | 48                    | 0.158708627 |
| GO:0009408                            | response to heat                   | 1                                          | 48                    | 0.175317862 |
| GO:0022625                            | cytosolic large ribosomal subunit  | 1                                          | 48                    | 0.183988984 |
| GO:0016887                            | ATPase activity                    | 1                                          | 48                    | 0.20319275  |
| GO:0008152                            | metabolic process                  | 2                                          | 48                    | 0.232230778 |
| GO:0016787                            | hydrolase activity                 | 1                                          | 48                    | 0.245288768 |
| GO:0022626                            | cytosolic ribosome                 | 1                                          | 48                    | 0.263898005 |
| GO:0005525                            | GTP binding                        | 1                                          | 48                    | 0.27155272  |
| GO:0006457                            | protein folding                    | 1                                          | 48                    | 0.296326372 |
| GO:0009737                            | response to abscisic acid stimulus | 1                                          | 48                    | 0.297101232 |
| GO:0031225                            | anchored to membrane               | 1                                          | 48                    | 0.297101232 |
| GO:0005215                            | transporter activity               | 1                                          | 48                    | 0.310876666 |
| GO:0016491                            | oxidoreductase activity            | 1                                          | 48                    | 0.312224865 |
| GO:0009505                            | plant-type cell wall               | 1                                          | 48                    | 0.319923105 |
| GO:0048046                            | apoplast                           | 1                                          | 48                    | 0.32174515  |
| GO:0009535                            | chloroplast thylakoid membrane     | 1                                          | 48                    | 0.325841481 |
| GO:0003735                            | structural constituent of ribosome | 1                                          | 48                    | 0.343670975 |
| GO:0006412                            | translation                        | 1                                          | 48                    | 0.348491553 |
| GO:0005622                            | intracellular                      | 1                                          | 48                    | 0.370000606 |
| GO:0005737                            | cytoplasm                          | 1                                          | 48                    | 0.372084923 |

### Cluster 27

| <u>GO Identifier</u> | <u>#Loci</u> | <u>Associated Loci (Left to Right)</u> |           |           |           |           |           |
|----------------------|--------------|----------------------------------------|-----------|-----------|-----------|-----------|-----------|
| GO:0000302           | 1            | AT1G07890                              |           |           |           |           |           |
| GO:0000325           | 1            | AT3G01390                              |           |           |           |           |           |
| GO:0003735           | 1            | AT1G77940                              |           |           |           |           |           |
| GO:0003755           | 1            | AT2G29960                              |           |           |           |           |           |
| GO:0003756           | 1            | AT1G04980                              |           |           |           |           |           |
| GO:0003824           | 2            | AT5G10730                              | AT5G15910 |           |           |           |           |
| GO:0004028           | 1            | AT1G44170                              |           |           |           |           |           |
| GO:0004029           | 1            | AT1G44170                              |           |           |           |           |           |
| GO:0004121           | 1            | AT3G57050                              |           |           |           |           |           |
| GO:0004129           | 3            | AT1G80230                              | AT3G15640 | AT4G37830 |           |           |           |
| GO:0004368           | 1            | AT3G10370                              |           |           |           |           |           |
| GO:0004452           | 1            | AT3G02780                              |           |           |           |           |           |
| GO:0004521           | 1            | AT3G20390                              |           |           |           |           |           |
| GO:0004551           | 1            | AT3G04080                              |           |           |           |           |           |
| GO:0004601           | 1            | AT3G06050                              |           |           |           |           |           |
| GO:0004784           | 1            | AT1G08830                              |           |           |           |           |           |
| GO:0005085           | 1            | AT3G43300                              |           |           |           |           |           |
| GO:0005215           | 1            | AT4G32400                              |           |           |           |           |           |
| GO:0005216           | 1            | AT2G43950                              |           |           |           |           |           |
| GO:0005388           | 1            | AT4G37640                              |           |           |           |           |           |
| GO:0005488           | 3            | AT4G32400                              | AT5G10730 | AT5G15910 |           |           |           |
| GO:0005516           | 2            | AT3G04080                              | AT4G37640 |           |           |           |           |
| GO:0005525           | 1            | AT3G46830                              |           |           |           |           |           |
| GO:0005618           | 2            | AT1G07890                              | AT3G44100 |           |           |           |           |
| GO:0005622           | 1            | AT3G43300                              |           |           |           |           |           |
| GO:0005624           | 1            | AT2G29960                              |           |           |           |           |           |
| GO:0005730           | 2            | AT2G03510                              | AT5G22880 |           |           |           |           |
| GO:0005737           | 1            | AT1G08830                              |           |           |           |           |           |
| GO:0005739           | 18           | AT1G20430                              | AT1G22840 | AT1G47420 | AT1G80230 | AT2G02050 | AT2G15620 |
|                      |              | AT2G43950                              | AT2G47840 | AT3G02780 | AT3G06050 | AT3G10370 | AT3G15000 |
|                      |              | AT3G15640                              | AT3G20390 | AT4G29480 | AT4G32400 | AT4G37830 | AT5G15910 |

**Cluster 27 (con.)**

| <b>GO Identifier</b> | <b>#Loci</b> | <b>Associated Loci (Left to Right)</b> |           |           |           |           |           |  |
|----------------------|--------------|----------------------------------------|-----------|-----------|-----------|-----------|-----------|--|
| GO:0005740           | 2            | AT1G80230                              | AT3G15640 |           |           |           |           |  |
| GO:0005743           | 2            | AT3G10370                              | AT4G32400 |           |           |           |           |  |
| GO:0005759           | 1            | AT3G06050                              |           |           |           |           |           |  |
| GO:0005768           | 1            | AT3G46830                              |           |           |           |           |           |  |
| GO:0005771           | 1            | AT2G29960                              |           |           |           |           |           |  |
| GO:0005773           | 6            | AT1G44170                              | AT3G01390 | AT3G20390 | AT3G44100 | AT3G57020 | AT4G38350 |  |
| GO:0005783           | 5            | AT1G44170                              | AT2G03510 | AT2G29960 | AT3G57020 | AT4G37640 |           |  |
| GO:0005789           | 1            | AT4G37640                              |           |           |           |           |           |  |
| GO:0005795           | 1            | AT2G29960                              |           |           |           |           |           |  |
| GO:0005829           | 4            | AT1G07890                              | AT1G08830 | AT2G29960 | AT3G02780 |           |           |  |
| GO:0005886           | 10           | AT1G07890                              | AT1G22840 | AT2G03510 | AT2G44060 | AT3G01390 | AT3G25780 |  |
|                      |              | AT3G46830                              | AT4G37640 | AT4G38350 | AT5G10730 |           |           |  |
| GO:0006071           | 1            | AT3G10370                              |           |           |           |           |           |  |
| GO:0006120           | 1            | AT2G02050                              |           |           |           |           |           |  |
| GO:0006127           | 1            | AT3G10370                              |           |           |           |           |           |  |
| GO:0006334           | 1            | AT5G22880                              |           |           |           |           |           |  |
| GO:0006412           | 1            | AT1G77940                              |           |           |           |           |           |  |
| GO:0006457           | 1            | AT2G29960                              |           |           |           |           |           |  |
| GO:0006810           | 3            | AT4G32400                              | AT4G37640 | AT5G60660 |           |           |           |  |
| GO:0006812           | 1            | AT2G43950                              |           |           |           |           |           |  |
| GO:0006839           | 1            | AT4G32400                              |           |           |           |           |           |  |
| GO:0006862           | 1            | AT4G32400                              |           |           |           |           |           |  |
| GO:0006979           | 2            | AT1G08830                              | AT3G06050 |           |           |           |           |  |
| GO:0007264           | 1            | AT3G46830                              |           |           |           |           |           |  |
| GO:0008137           | 1            | AT2G02050                              |           |           |           |           |           |  |
| GO:0008152           | 2            | AT5G10730                              | AT5G15910 |           |           |           |           |  |
| GO:0008158           | 1            | AT4G38350                              |           |           |           |           |           |  |
| GO:0008283           | 1            | AT1G22840                              |           |           |           |           |           |  |
| GO:0008299           | 1            | AT3G02780                              |           |           |           |           |           |  |
| GO:0008794           | 1            | AT5G20500                              |           |           |           |           |           |  |
| GO:0009055           | 1            | AT1G22840                              |           |           |           |           |           |  |
| GO:0009269           | 2            | AT1G44170                              | AT2G44060 |           |           |           |           |  |
| GO:0009408           | 1            | AT1G07890                              |           |           |           |           |           |  |
| GO:0009504           | 1            | AT3G46830                              |           |           |           |           |           |  |
| GO:0009505           | 1            | AT1G04980                              |           |           |           |           |           |  |
| GO:0009507           | 12           | AT1G07890                              | AT2G15620 | AT2G22170 | AT2G37860 | AT2G43950 | AT2G47840 |  |
|                      |              | AT3G02780                              | AT3G20390 | AT3G57050 | AT4G05390 | AT4G32400 | AT5G54800 |  |
| GO:0009535           | 1            | AT3G15640                              |           |           |           |           |           |  |
| GO:0009536           | 6            | AT1G44170                              | AT2G43950 | AT2G47840 | AT3G20390 | AT4G32400 | AT5G15910 |  |
| GO:0009570           | 2            | AT1G07890                              | AT2G15620 |           |           |           |           |  |
| GO:0009579           | 2            | AT2G22170                              | AT3G20390 |           |           |           |           |  |
| GO:0009620           | 1            | AT3G25780                              |           |           |           |           |           |  |
| GO:0009624           | 1            | AT5G54800                              |           |           |           |           |           |  |
| GO:0009651           | 4            | AT1G07890                              | AT1G08830 | AT1G44170 | AT3G25780 |           |           |  |
| GO:0009695           | 1            | AT3G25780                              |           |           |           |           |           |  |
| GO:0009706           | 1            | AT2G43950                              |           |           |           |           |           |  |
| GO:0009737           | 1            | AT1G44170                              |           |           |           |           |           |  |
| GO:0009793           | 2            | AT1G07890                              | AT2G44060 |           |           |           |           |  |
| GO:0009821           | 1            | AT3G57020                              |           |           |           |           |           |  |
| GO:0009846           | 1            | AT3G04080                              |           |           |           |           |           |  |
| GO:0009853           | 1            | AT2G02050                              |           |           |           |           |           |  |
| GO:0009908           | 1            | AT3G02780                              |           |           |           |           |           |  |
| GO:0009941           | 2            | AT2G43950                              | AT2G47840 |           |           |           |           |  |
| GO:0010039           | 1            | AT1G08830                              |           |           |           |           |           |  |
| GO:0010193           | 1            | AT1G08830                              |           |           |           |           |           |  |
| GO:0015031           | 1            | AT3G46830                              |           |           |           |           |           |  |
| GO:0015085           | 1            | AT4G37640                              |           |           |           |           |           |  |
| GO:0015152           | 1            | AT5G54800                              |           |           |           |           |           |  |
| GO:0015215           | 1            | AT4G32400                              |           |           |           |           |           |  |

**Cluster 27 (con.)**

| <b>GO Identifier</b> | <b>#Loci</b> | <b>Associated Loci (Left to Right)</b> |           |           |           |           |           |
|----------------------|--------------|----------------------------------------|-----------|-----------|-----------|-----------|-----------|
| GO:0015250           | 1            | AT5G60660                              |           |           |           |           |           |
| GO:0015297           | 1            | AT5G54800                              |           |           |           |           |           |
| GO:0015991           | 1            | AT3G01390                              |           |           |           |           |           |
| GO:0015992           | 1            | AT4G29480                              |           |           |           |           |           |
| GO:0015995           | 1            | AT3G02780                              |           |           |           |           |           |
| GO:0016020           | 10           | AT1G44170                              | AT2G15620 | AT2G22170 | AT2G37860 | AT2G43950 | AT2G44060 |
|                      |              | AT3G25780                              | AT4G38350 | AT5G54800 | AT5G60660 |           |           |
| GO:0016021           | 2            | AT5G42090                              | AT5G54800 |           |           |           |           |
| GO:0016209           | 1            | AT3G06050                              |           |           |           |           |           |
| GO:0016469           | 1            | AT3G01390                              |           |           |           |           |           |
| GO:0016491           | 1            | AT4G05390                              |           |           |           |           |           |
| GO:0016688           | 1            | AT1G07890                              |           |           |           |           |           |
| GO:0016787           | 1            | AT3G48410                              |           |           |           |           |           |
| GO:0016844           | 1            | AT3G57020                              |           |           |           |           |           |
| GO:0016887           | 1            | AT3G04080                              |           |           |           |           |           |
| GO:0019279           | 1            | AT3G57050                              |           |           |           |           |           |
| GO:0019430           | 1            | AT1G08830                              |           |           |           |           |           |
| GO:0019563           | 1            | AT3G10370                              |           |           |           |           |           |
| GO:0022625           | 1            | AT1G77940                              |           |           |           |           |           |
| GO:0022626           | 1            | AT1G77940                              |           |           |           |           |           |
| GO:0031225           | 1            | AT3G44100                              |           |           |           |           |           |
| GO:0031966           | 1            | AT2G02050                              |           |           |           |           |           |
| GO:0042651           | 1            | AT4G05390                              |           |           |           |           |           |
| GO:0042742           | 2            | AT1G08830                              | AT3G43300 |           |           |           |           |
| GO:0044237           | 2            | AT5G10730                              | AT5G15910 |           |           |           |           |
| GO:0045271           | 1            | AT2G02050                              |           |           |           |           |           |
| GO:0046423           | 1            | AT3G25780                              |           |           |           |           |           |
| GO:0046686           | 4            | AT1G07890                              | AT2G44060 | AT3G06050 | AT3G20390 |           |           |
| GO:0046688           | 1            | AT1G08830                              |           |           |           |           |           |
| GO:0046872           | 1            | AT3G15640                              |           |           |           |           |           |
| GO:0046933           | 2            | AT3G01390                              | AT4G29480 |           |           |           |           |
| GO:0046961           | 1            | AT4G29480                              |           |           |           |           |           |
| GO:0047889           | 1            | AT2G15620                              |           |           |           |           |           |
| GO:0048046           | 1            | AT2G15620                              |           |           |           |           |           |
| GO:0048366           | 1            | AT2G37860                              |           |           |           |           |           |
| GO:0050421           | 1            | AT2G15620                              |           |           |           |           |           |
| GO:0050662           | 2            | AT5G10730                              | AT5G15910 |           |           |           |           |

## Cluster 28

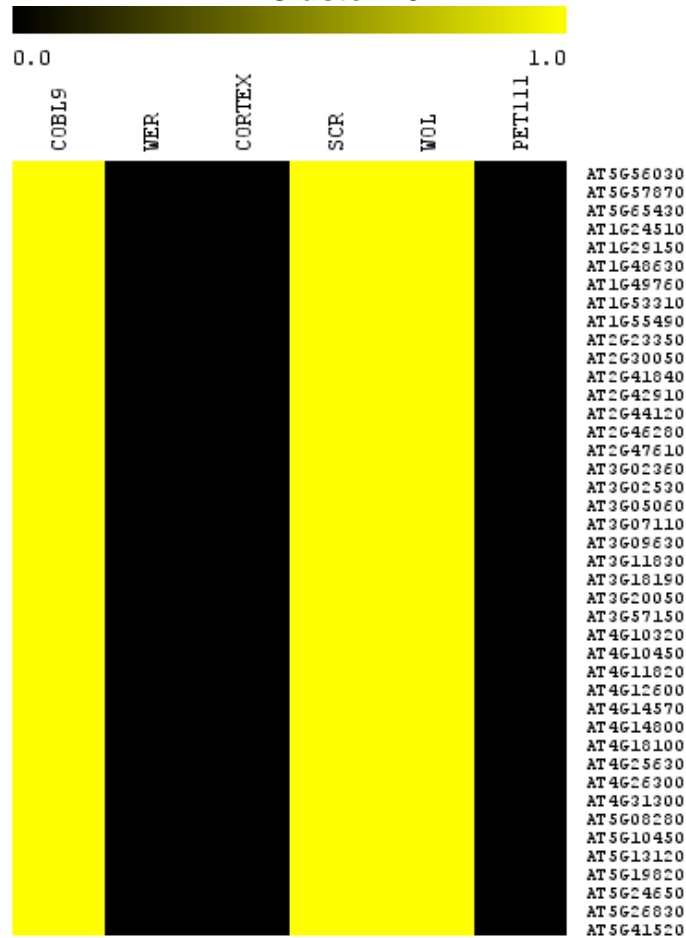

### Cluster 28

|           |           |           |           |           |
|-----------|-----------|-----------|-----------|-----------|
| AT1G24510 | AT2G23350 | AT3G02360 | AT4G10320 | AT5G08280 |
| AT1G29150 | AT2G30050 | AT3G02530 | AT4G10450 | AT5G10450 |
| AT1G48630 | AT2G41840 | AT3G05060 | AT4G11820 | AT5G13120 |
| AT1G49760 | AT2G42910 | AT3G07110 | AT4G12600 | AT5G19820 |
| AT1G53310 | AT2G44120 | AT3G09630 | AT4G14570 | AT5G24650 |
| AT1G55490 | AT2G46280 | AT3G11830 | AT4G14800 | AT5G26830 |
|           | AT2G47610 | AT3G18190 | AT4G18100 | AT5G41520 |
|           |           | AT3G20050 | AT4G25630 | AT5G56030 |
|           |           | AT3G57150 | AT4G26300 | AT5G57870 |
|           |           |           | AT4G31300 | AT5G65430 |

| Cluster 28<br>GO identifier | Description                        | #<br>Associated<br>to the GO<br>in Cluster | Total # in<br>Cluster | p-value  |
|-----------------------------|------------------------------------|--------------------------------------------|-----------------------|----------|
| GO:0022626                  | cytosolic ribosome                 | 9                                          | 42                    | 3.78E-11 |
| GO:0005730                  | nucleolus                          | 9                                          | 42                    | 8.74E-10 |
| GO:0051082                  | unfolded protein binding           | 6                                          | 42                    | 4.65E-08 |
| GO:0006412                  | translation                        | 8                                          | 42                    | 1.10E-07 |
| GO:0046686                  | response to cadmium ion            | 7                                          | 42                    | 1.18E-06 |
| GO:0003735                  | structural constituent of ribosome | 7                                          | 42                    | 1.36E-06 |

| Cluster 28<br>GO identifier<br>(con.) | Description                                                      | #<br>Associated<br>to the GO<br>in Cluster | Total # in<br>Cluster | p-value     |
|---------------------------------------|------------------------------------------------------------------|--------------------------------------------|-----------------------|-------------|
| GO:0022625                            | cytosolic large ribosomal subunit                                | 5                                          | 42                    | 1.65E-06    |
| GO:0005618                            | cell wall                                                        | 7                                          | 42                    | 2.09E-06    |
| GO:0005524                            | ATP binding                                                      | 8                                          | 42                    | 2.64E-05    |
| GO:0015934                            | large ribosomal subunit                                          | 3                                          | 42                    | 4.29E-05    |
| GO:0006457                            | protein folding                                                  | 5                                          | 42                    | 5.09E-05    |
| GO:0009507                            | chloroplast                                                      | 14                                         | 42                    | 9.25E-05    |
| GO:0044267                            | cellular protein metabolic process                               | 2                                          | 42                    | 2.14E-04    |
| GO:0005773                            | vacuole                                                          | 6                                          | 42                    | 2.17E-04    |
| GO:0045309                            | protein phosphorylated amino acid binding                        | 2                                          | 42                    | 2.56E-04    |
| GO:0003743                            | translation initiation factor activity                           | 3                                          | 42                    | 3.67E-04    |
| GO:0005839                            | proteasome core complex                                          | 2                                          | 42                    | 7.27E-04    |
| GO:0009742                            | brassinosteroid mediated signaling                               | 2                                          | 42                    | 8.02E-04    |
| GO:0005886                            | plasma membrane                                                  | 10                                         | 42                    | 0.001086318 |
| GO:0005737                            | cytoplasm                                                        | 5                                          | 42                    | 0.001361365 |
| GO:0005515                            | protein binding                                                  | 8                                          | 42                    | 0.001871039 |
| GO:0004418                            | hydroxymethylbilane synthase activity                            | 1                                          | 42                    | 0.002013906 |
| GO:0004421                            | hydroxymethylglutaryl-CoA synthase activity                      | 1                                          | 42                    | 0.002013906 |
| GO:0003723                            | RNA binding                                                      | 4                                          | 42                    | 0.002573353 |
| GO:0016020                            | membrane                                                         | 8                                          | 42                    | 0.003480614 |
| GO:0008233                            | peptidase activity                                               | 2                                          | 42                    | 0.003765704 |
| GO:0001510                            | RNA methylation                                                  | 1                                          | 42                    | 0.004019892 |
| GO:0004814                            | arginine-tRNA ligase activity                                    | 1                                          | 42                    | 0.004019892 |
| GO:0004829                            | threonine-tRNA ligase activity                                   | 1                                          | 42                    | 0.004019892 |
| GO:0006420                            | arginyl-tRNA aminoacylation                                      | 1                                          | 42                    | 0.004019892 |
| GO:0006435                            | threonyl-tRNA aminoacylation                                     | 1                                          | 42                    | 0.004019892 |
| GO:0006900                            | membrane budding                                                 | 1                                          | 42                    | 0.004019892 |
| GO:0019287                            | isopentenyl diphosphate biosynthetic process, mevalonate pathway | 1                                          | 42                    | 0.004019892 |
| GO:0030089                            | phycobilisome                                                    | 1                                          | 42                    | 0.004019892 |
| GO:0030515                            | snoRNA binding                                                   | 1                                          | 42                    | 0.004019892 |
| GO:0031119                            | tRNA pseudouridine synthesis                                     | 1                                          | 42                    | 0.004019892 |
| GO:0051085                            | chaperone mediated protein folding requiring cofactor            | 1                                          | 42                    | 0.004019892 |
| GO:0006511                            | ubiquitin-dependent protein catabolic process                    | 3                                          | 42                    | 0.006012115 |
| GO:0003985                            | acetyl-CoA C-acetyltransferase activity                          | 1                                          | 42                    | 0.006017983 |
| GO:0004749                            | ribose phosphate diphosphokinase activity                        | 1                                          | 42                    | 0.0080082   |
| GO:0008964                            | phosphoenolpyruvate carboxylase activity                         | 1                                          | 42                    | 0.0080082   |
| GO:0050821                            | protein stabilization                                            | 1                                          | 42                    | 0.0080082   |
| GO:0009165                            | nucleotide biosynthetic process                                  | 1                                          | 42                    | 0.009990566 |
| GO:0030529                            | ribonucleoprotein complex                                        | 1                                          | 42                    | 0.009990566 |
| GO:0022627                            | cytosolic small ribosomal subunit                                | 2                                          | 42                    | 0.010768598 |
| GO:0048046                            | apoplast                                                         | 3                                          | 42                    | 0.011178647 |
| GO:0004616                            | phosphogluconate dehydrogenase (decarboxylating) activity        | 1                                          | 42                    | 0.015890788 |
| GO:0009651                            | response to salt stress                                          | 3                                          | 42                    | 0.017636549 |
| GO:0006099                            | tricarboxylic acid cycle                                         | 1                                          | 42                    | 0.019785428 |
| GO:0008541                            | proteasome regulatory particle, lid subcomplex                   | 1                                          | 42                    | 0.021721164 |
| GO:0010286                            | heat acclimation                                                 | 1                                          | 42                    | 0.021721164 |
| GO:0042742                            | defense response to bacterium                                    | 2                                          | 42                    | 0.027361702 |
| GO:0006779                            | porphyrin biosynthetic process                                   | 1                                          | 42                    | 0.027482297 |
| GO:0009414                            | response to water deprivation                                    | 2                                          | 42                    | 0.028078956 |
| GO:0009982                            | pseudouridine synthase activity                                  | 1                                          | 42                    | 0.029387391 |
| GO:0009941                            | chloroplast envelope                                             | 3                                          | 42                    | 0.031799089 |

| Cluster 28<br>GO identifier<br>(con.) | Description                                                           | #<br>Associated<br>to the GO<br>in Cluster | Total # in<br>Cluster | p-value     |
|---------------------------------------|-----------------------------------------------------------------------|--------------------------------------------|-----------------------|-------------|
| GO:0005744                            | mitochondrial inner membrane presequence translocase complex          | 1                                          | 42                    | 0.038799226 |
| GO:0009627                            | systemic acquired resistance                                          | 1                                          | 42                    | 0.040659019 |
| GO:0016310                            | phosphorylation                                                       | 1                                          | 42                    | 0.042511338 |
| GO:0030163                            | protein catabolic process                                             | 1                                          | 42                    | 0.042511338 |
| GO:0006364                            | rRNA processing                                                       | 1                                          | 42                    | 0.049846309 |
| GO:0015995                            | chlorophyll biosynthetic process                                      | 1                                          | 42                    | 0.049846309 |
| GO:0008219                            | cell death                                                            | 1                                          | 42                    | 0.057063422 |
| GO:0010319                            | stromule                                                              | 1                                          | 42                    | 0.058849446 |
| GO:0008236                            | serine-type peptidase activity                                        | 1                                          | 42                    | 0.06062821  |
| GO:0000166                            | nucleotide binding                                                    | 2                                          | 42                    | 0.061726323 |
| GO:0048367                            | shoot development                                                     | 1                                          | 42                    | 0.069413874 |
| GO:0015450                            | P-P-bond-hydrolysis-driven protein transmembrane transporter activity | 1                                          | 42                    | 0.079721491 |
| GO:0031977                            | thylakoid lumen                                                       | 1                                          | 42                    | 0.083101068 |
| GO:0016829                            | lyase activity                                                        | 1                                          | 42                    | 0.089776765 |
| GO:0009793                            | embryonic development ending in seed dormancy                         | 2                                          | 42                    | 0.089893841 |
| GO:0005834                            | heterotrimeric G-protein complex                                      | 1                                          | 42                    | 0.096342266 |
| GO:0003755                            | peptidyl-prolyl cis-trans isomerase activity                          | 1                                          | 42                    | 0.097966575 |
| GO:0006413                            | translational initiation                                              | 1                                          | 42                    | 0.099584097 |
| GO:0048364                            | root development                                                      | 1                                          | 42                    | 0.120003308 |
| GO:0009543                            | chloroplast thylakoid lumen                                           | 1                                          | 42                    | 0.121527888 |
| GO:0009570                            | chloroplast stroma                                                    | 2                                          | 42                    | 0.125130269 |
| GO:0009908                            | flower development                                                    | 1                                          | 42                    | 0.126062752 |
| GO:0048366                            | leaf development                                                      | 1                                          | 42                    | 0.130539698 |
| GO:0005739                            | mitochondrion                                                         | 3                                          | 42                    | 0.133030538 |
| GO:0015031                            | protein transport                                                     | 1                                          | 42                    | 0.14219896  |
| GO:0042254                            | ribosome biogenesis                                                   | 1                                          | 42                    | 0.156213583 |
| GO:0009408                            | response to heat                                                      | 1                                          | 42                    | 0.157581497 |
| GO:0005777                            | peroxisome                                                            | 1                                          | 42                    | 0.179928484 |
| GO:0005634                            | nucleus                                                               | 4                                          | 42                    | 0.195975351 |
| GO:0009579                            | thylakoid                                                             | 1                                          | 42                    | 0.245166266 |
| GO:0005829                            | cytosol                                                               | 1                                          | 42                    | 0.247068197 |
| GO:0005840                            | ribosome                                                              | 1                                          | 42                    | 0.258084766 |
| GO:0009409                            | response to cold                                                      | 1                                          | 42                    | 0.261609258 |
| GO:0009505                            | plant-type cell wall                                                  | 1                                          | 42                    | 0.299846969 |
| GO:0009535                            | chloroplast thylakoid membrane                                        | 1                                          | 42                    | 0.306286109 |
| GO:0006952                            | defense response                                                      | 1                                          | 42                    | 0.344589024 |
| GO:0006508                            | proteolysis                                                           | 1                                          | 42                    | 0.348466385 |

### Cluster 28

| GO Identifier | #Loci | Associated Loci (Left to Right)                                          |
|---------------|-------|--------------------------------------------------------------------------|
| GO:0000166    | 2     | AT1G48630 AT2G30050                                                      |
| GO:0001510    | 1     | AT4G25630                                                                |
| GO:0003723    | 4     | AT1G49760 AT2G23350 AT4G12600 AT5G57870                                  |
| GO:0003735    | 7     | AT2G41840 AT2G44120 AT2G47610 AT3G07110 AT3G09630 AT4G10450<br>AT5G41520 |
| GO:0003743    | 3     | AT1G49760 AT2G23350 AT5G57870                                            |
| GO:0003755    | 1     | AT5G13120                                                                |
| GO:0003985    | 1     | AT4G11820                                                                |
| GO:0004418    | 1     | AT5G08280                                                                |
| GO:0004421    | 1     | AT4G11820                                                                |
| GO:0004616    | 1     | AT3G02360                                                                |



**Cluster 28 (con.)**

| <b>GO Identifier</b> | <b>#Loci</b> | <b>Associated Loci (Left to Right)</b> |           |           |           |           |           |
|----------------------|--------------|----------------------------------------|-----------|-----------|-----------|-----------|-----------|
| GO:0004749           | 1            | AT2G42910                              |           |           |           |           |           |
| GO:0004814           | 1            | AT4G26300                              |           |           |           |           |           |
| GO:0004829           | 1            | AT5G26830                              |           |           |           |           |           |
| GO:0005515           | 8            | AT1G24510                              | AT1G55490 | AT3G02530 | AT3G11830 | AT3G18190 | AT3G20050 |
|                      |              | AT5G10450                              | AT5G65430 |           |           |           |           |
| GO:0005524           | 8            | AT1G24510                              | AT1G55490 | AT3G02530 | AT3G11830 | AT3G18190 | AT3G20050 |
|                      |              | AT4G26300                              | AT5G56030 |           |           |           |           |
| GO:0005618           | 7            | AT3G09630                              | AT5G10450 | AT5G19820 | AT5G26830 | AT5G41520 | AT5G56030 |
|                      |              | AT5G65430                              |           |           |           |           |           |
| GO:0005634           | 4            | AT1G29150                              | AT5G10450 | AT5G57870 | AT5G65430 |           |           |
| GO:0005730           | 9            | AT2G30050                              | AT2G41840 | AT2G44120 | AT2G47610 | AT3G05060 | AT3G07110 |
|                      |              | AT3G09630                              | AT3G57150 | AT4G25630 |           |           |           |
| GO:0005737           | 5            | AT2G42910                              | AT3G02530 | AT5G10450 | AT5G57870 | AT5G65430 |           |
| GO:0005739           | 3            | AT4G26300                              | AT5G26830 | AT5G56030 |           |           |           |
| GO:0005744           | 1            | AT5G24650                              |           |           |           |           |           |
| GO:0005773           | 6            | AT2G44120                              | AT3G09630 | AT4G14570 | AT4G14800 | AT4G31300 | AT5G24650 |
| GO:0005777           | 1            | AT3G02360                              |           |           |           |           |           |
| GO:0005829           | 1            | AT5G10450                              |           |           |           |           |           |
| GO:0005834           | 1            | AT2G30050                              |           |           |           |           |           |
| GO:0005839           | 2            | AT4G14800                              | AT4G31300 |           |           |           |           |
| GO:0005840           | 1            | AT3G09630                              |           |           |           |           |           |
| GO:0005886           | 10           | AT1G24510                              | AT1G55490 | AT2G42910 | AT2G47610 | AT3G09630 | AT4G31300 |
|                      |              | AT5G10450                              | AT5G24650 | AT5G26830 | AT5G65430 |           |           |
| GO:0006099           | 1            | AT1G53310                              |           |           |           |           |           |
| GO:0006364           | 1            | AT4G25630                              |           |           |           |           |           |
| GO:0006412           | 8            | AT2G41840                              | AT2G44120 | AT2G47610 | AT3G07110 | AT3G09630 | AT4G10450 |
|                      |              | AT5G41520                              | AT5G57870 |           |           |           |           |
| GO:0006413           | 1            | AT5G57870                              |           |           |           |           |           |
| GO:0006420           | 1            | AT4G26300                              |           |           |           |           |           |
| GO:0006435           | 1            | AT5G26830                              |           |           |           |           |           |
| GO:0006457           | 5            | AT1G24510                              | AT1G55490 | AT3G20050 | AT5G13120 | AT5G56030 |           |
| GO:0006508           | 1            | AT4G14570                              |           |           |           |           |           |
| GO:0006511           | 3            | AT1G29150                              | AT4G14800 | AT4G31300 |           |           |           |
| GO:0006779           | 1            | AT5G08280                              |           |           |           |           |           |
| GO:0006900           | 1            | AT2G30050                              |           |           |           |           |           |
| GO:0006952           | 1            | AT5G56030                              |           |           |           |           |           |
| GO:0008219           | 1            | AT1G55490                              |           |           |           |           |           |
| GO:0008233           | 2            | AT4G14800                              | AT4G31300 |           |           |           |           |
| GO:0008236           | 1            | AT4G14570                              |           |           |           |           |           |
| GO:0008541           | 1            | AT1G29150                              |           |           |           |           |           |
| GO:0008964           | 1            | AT1G53310                              |           |           |           |           |           |
| GO:0009165           | 1            | AT2G42910                              |           |           |           |           |           |
| GO:0009408           | 1            | AT5G56030                              |           |           |           |           |           |
| GO:0009409           | 1            | AT1G55490                              |           |           |           |           |           |
| GO:0009414           | 2            | AT1G53310                              | AT5G56030 |           |           |           |           |
| GO:0009505           | 1            | AT5G65430                              |           |           |           |           |           |
| GO:0009507           | 14           | AT1G55490                              | AT2G44120 | AT2G47610 | AT3G07110 | AT3G09630 | AT4G14570 |
|                      |              | AT4G26300                              | AT5G08280 | AT5G10450 | AT5G13120 | AT5G24650 | AT5G26830 |
|                      |              | AT5G41520                              | AT5G65430 |           |           |           |           |
| GO:0009535           | 1            | AT5G13120                              |           |           |           |           |           |
| GO:0009543           | 1            | AT5G13120                              |           |           |           |           |           |
| GO:0009570           | 2            | AT1G55490                              | AT5G08280 |           |           |           |           |
| GO:0009579           | 1            | AT5G13120                              |           |           |           |           |           |
| GO:0009627           | 1            | AT1G55490                              |           |           |           |           |           |
| GO:0009651           | 3            | AT3G02360                              | AT4G31300 | AT5G56030 |           |           |           |
| GO:0009742           | 2            | AT5G10450                              | AT5G65430 |           |           |           |           |
| GO:0009793           | 2            | AT4G26300                              | AT5G19820 |           |           |           |           |
| GO:0009908           | 1            | AT5G56030                              |           |           |           |           |           |
| GO:0009941           | 3            | AT1G55490                              | AT5G08280 | AT5G24650 |           |           |           |

**Cluster 28**

| <b>GO Identifier</b> | <b>#Loci</b> | <b>Associated Loci (Left to Right)</b> |           |           |           |           |           |  |
|----------------------|--------------|----------------------------------------|-----------|-----------|-----------|-----------|-----------|--|
| GO:0009982           | 1            | AT3G57150                              |           |           |           |           |           |  |
| GO:0010286           | 1            | AT5G56030                              |           |           |           |           |           |  |
| GO:0010319           | 1            | AT1G55490                              |           |           |           |           |           |  |
| GO:0015031           | 1            | AT5G24650                              |           |           |           |           |           |  |
| GO:0015450           | 1            | AT5G24650                              |           |           |           |           |           |  |
| GO:0015934           | 3            | AT2G44120                              | AT3G07110 | AT4G10450 |           |           |           |  |
| GO:0015995           | 1            | AT5G08280                              |           |           |           |           |           |  |
| GO:0016020           | 8            | AT1G55490                              | AT2G41840 | AT2G44120 | AT3G02530 | AT3G05060 | AT3G07110 |  |
|                      |              | AT3G09630                              | AT5G26830 |           |           |           |           |  |
| GO:0016310           | 1            | AT5G10450                              |           |           |           |           |           |  |
| GO:0016829           | 1            | AT5G19820                              |           |           |           |           |           |  |
| GO:0019287           | 1            | AT4G11820                              |           |           |           |           |           |  |
| GO:0022625           | 5            | AT2G44120                              | AT2G47610 | AT3G07110 | AT3G09630 | AT4G10450 |           |  |
| GO:0022626           | 9            | AT1G48630                              | AT1G55490 | AT2G41840 | AT2G44120 | AT2G47610 | AT3G07110 |  |
|                      |              | AT3G09630                              | AT4G10450 | AT5G41520 |           |           |           |  |
| GO:0022627           | 2            | AT2G41840                              | AT5G41520 |           |           |           |           |  |
| GO:0030089           | 1            | AT5G19820                              |           |           |           |           |           |  |
| GO:0030163           | 1            | AT1G29150                              |           |           |           |           |           |  |
| GO:0030515           | 1            | AT4G25630                              |           |           |           |           |           |  |
| GO:0030529           | 1            | AT4G12600                              |           |           |           |           |           |  |
| GO:0031119           | 1            | AT3G57150                              |           |           |           |           |           |  |
| GO:0031977           | 1            | AT5G13120                              |           |           |           |           |           |  |
| GO:0042254           | 1            | AT4G12600                              |           |           |           |           |           |  |
| GO:0042742           | 2            | AT5G08280                              | AT5G10450 |           |           |           |           |  |
| GO:0044267           | 2            | AT1G24510                              | AT3G20050 |           |           |           |           |  |
| GO:0045309           | 2            | AT5G10450                              | AT5G65430 |           |           |           |           |  |
| GO:0046686           | 7            | AT1G29150                              | AT1G49760 | AT2G23350 | AT3G02530 | AT3G11830 | AT3G18190 |  |
|                      |              | AT5G10450                              |           |           |           |           |           |  |
| GO:0048046           | 3            | AT1G53310                              | AT1G55490 | AT5G08280 |           |           |           |  |
| GO:0048364           | 1            | AT1G48630                              |           |           |           |           |           |  |
| GO:0048366           | 1            | AT5G56030                              |           |           |           |           |           |  |
| GO:0048367           | 1            | AT1G48630                              |           |           |           |           |           |  |
| GO:0050821           | 1            | AT5G56030                              |           |           |           |           |           |  |
| GO:0051082           | 6            | AT1G24510                              | AT1G55490 | AT3G02530 | AT3G11830 | AT3G18190 | AT3G20050 |  |
| GO:0051085           | 1            | AT1G55490                              |           |           |           |           |           |  |

## Cluster 29

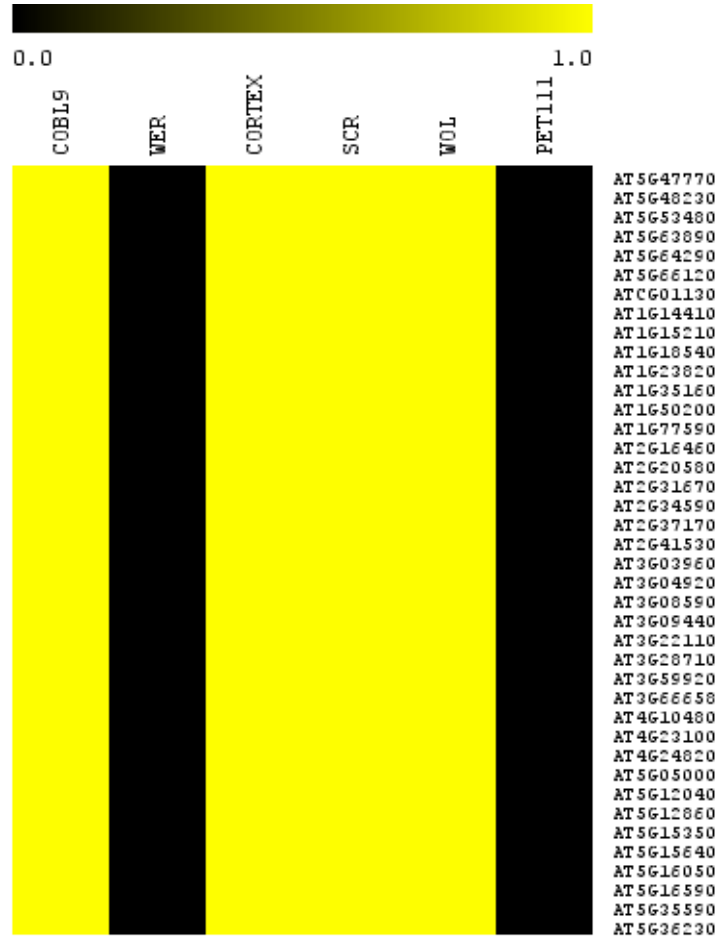

### Cluster 29

|           |           |           |           |           |
|-----------|-----------|-----------|-----------|-----------|
| AT1G14410 | AT2G16460 | AT3G03960 | AT4G10480 | AT5G05000 |
| AT1G15210 | AT2G20580 | AT3G04920 | AT4G23100 | AT5G12040 |
| AT1G18540 | AT2G31670 | AT3G08590 | AT4G24820 | AT5G12860 |
| AT1G23820 | AT2G34590 | AT3G09440 |           | AT5G15350 |
| AT1G35160 | AT2G37170 | AT3G22110 |           | AT5G15640 |
| AT1G50200 | AT2G41530 | AT3G28710 |           | AT5G16050 |
| AT1G77590 |           | AT3G59920 |           | AT5G16590 |
|           |           | AT3G66658 |           | AT5G35590 |
|           |           |           |           | AT5G36230 |
|           |           |           |           | AT5G47770 |
|           |           |           |           | AT5G48230 |
|           |           |           |           | AT5G53480 |
|           |           |           |           | AT5G63890 |
|           |           |           |           | AT5G64290 |
|           |           |           |           | AT5G66120 |
|           |           |           |           | ATCG01130 |

| Cluster 29<br>GO identifier | Description                                                           | #<br>Associated<br>to the GO<br>in Cluster | Total # in<br>Cluster | p-value     |
|-----------------------------|-----------------------------------------------------------------------|--------------------------------------------|-----------------------|-------------|
| GO:0009507                  | chloroplast                                                           | 17                                         | 39                    | 2.53E-07    |
| GO:0046686                  | response to cadmium ion                                               | 7                                          | 39                    | 7.02E-07    |
| GO:0015367                  | oxoglutarate:malate antiporter activity                               | 2                                          | 39                    | 1.02E-05    |
| GO:0015743                  | malate transport                                                      | 2                                          | 39                    | 3.39E-05    |
| GO:0016020                  | membrane                                                              | 10                                         | 39                    | 1.06E-04    |
| GO:0005886                  | plasma membrane                                                       | 11                                         | 39                    | 1.37E-04    |
| GO:0022626                  | cytosolic ribosome                                                    | 4                                          | 39                    | 2.48E-04    |
| GO:0005739                  | mitochondrion                                                         | 7                                          | 39                    | 4.21E-04    |
| GO:0009941                  | chloroplast envelope                                                  | 5                                          | 39                    | 5.40E-04    |
| GO:0030163                  | protein catabolic process                                             | 2                                          | 39                    | 7.60E-04    |
| GO:0009536                  | plastid                                                               | 3                                          | 39                    | 0.001735716 |
| GO:0003856                  | 3-dehydroquinate synthase activity                                    | 1                                          | 39                    | 0.001870055 |
| GO:0004357                  | glutamate-cysteine ligase activity                                    | 1                                          | 39                    | 0.001870055 |
| GO:0004399                  | histidinol dehydrogenase activity                                     | 1                                          | 39                    | 0.001870055 |
| GO:0004813                  | alanine-tRNA ligase activity                                          | 1                                          | 39                    | 0.001870055 |
| GO:0006419                  | alanyl-tRNA aminoacylation                                            | 1                                          | 39                    | 0.001870055 |
| GO:0016876                  | ligase activity, forming aminoacyl-tRNA and related compounds         | 1                                          | 39                    | 0.001870055 |
| GO:0018738                  | S-formylglutathione hydrolase activity                                | 1                                          | 39                    | 0.001870055 |
| GO:0019750                  | chloroplast transport                                                 | 1                                          | 39                    | 0.001870055 |
| GO:0032211                  | negative regulation of telomere maintenance via telomerase            | 1                                          | 39                    | 0.001870055 |
| GO:0009570                  | chloroplast stroma                                                    | 4                                          | 39                    | 0.003711306 |
| GO:0004337                  | geranyltranstransferase activity                                      | 1                                          | 39                    | 0.003733295 |
| GO:0005697                  | telomerase holoenzyme complex                                         | 1                                          | 39                    | 0.003733295 |
| GO:0006750                  | glutathione biosynthetic process                                      | 1                                          | 39                    | 0.003733295 |
| GO:0009700                  | indole phytoalexin biosynthetic process                               | 1                                          | 39                    | 0.003733295 |
| GO:0045337                  | farnesyl diphosphate biosynthetic process                             | 1                                          | 39                    | 0.003733295 |
| GO:0046537                  | 2,3-bisphosphoglycerate-independent phosphoglycerate mutase activity  | 1                                          | 39                    | 0.003733295 |
| GO:0009624                  | response to nematode                                                  | 2                                          | 39                    | 0.004134124 |
| GO:0005524                  | ATP binding                                                           | 5                                          | 39                    | 0.00490599  |
| GO:0006511                  | ubiquitin-dependent protein catabolic process                         | 3                                          | 39                    | 0.004917472 |
| GO:0003985                  | acetyl-CoA C-acetyltransferase activity                               | 1                                          | 39                    | 0.005589738 |
| GO:0004161                  | dimethylallyltranstransferase activity                                | 1                                          | 39                    | 0.005589738 |
| GO:0004766                  | spermidine synthase activity                                          | 1                                          | 39                    | 0.005589738 |
| GO:0004802                  | transketolase activity                                                | 1                                          | 39                    | 0.005589738 |
| GO:0008295                  | spermidine biosynthetic process                                       | 1                                          | 39                    | 0.005589738 |
| GO:0005093                  | RAB GDP-dissociation inhibitor activity                               | 1                                          | 39                    | 0.007439402 |
| GO:0042162                  | telomeric DNA binding                                                 | 1                                          | 39                    | 0.007439402 |
| GO:0048046                  | apoplast                                                              | 3                                          | 39                    | 0.009211473 |
| GO:0016810                  | hydrolase activity, acting on carbon-nitrogen (but not peptide) bonds | 1                                          | 39                    | 0.009282305 |
| GO:0002213                  | defense response to insect                                            | 1                                          | 39                    | 0.011118465 |
| GO:0004739                  | pyruvate dehydrogenase (acetyl-transferring) activity                 | 1                                          | 39                    | 0.011118465 |
| GO:0009408                  | response to heat                                                      | 2                                          | 39                    | 0.012644968 |
| GO:0004467                  | long-chain-fatty-acid-CoA ligase activity                             | 1                                          | 39                    | 0.0129479   |
| GO:0009610                  | response to symbiotic fungus                                          | 1                                          | 39                    | 0.0129479   |
| GO:0006446                  | regulation of translational initiation                                | 1                                          | 39                    | 0.014770628 |
| GO:0008540                  | proteasome regulatory particle, base subcomplex                       | 1                                          | 39                    | 0.014770628 |
| GO:0045036                  | protein targeting to chloroplast                                      | 1                                          | 39                    | 0.016586667 |
| GO:0005777                  | peroxisome                                                            | 2                                          | 39                    | 0.017133571 |
| GO:0008541                  | proteasome regulatory particle, lid subcomplex                        | 1                                          | 39                    | 0.02019875  |

| Cluster 29<br>GO identifier<br>(con.) | Description                                                      | #<br>Associated<br>to the GO<br>in Cluster | Total # in<br>Cluster | p-value     |
|---------------------------------------|------------------------------------------------------------------|--------------------------------------------|-----------------------|-------------|
| GO:0044267                            | cellular protein metabolic process                               | 1                                          | 39                    | 0.02019875  |
| GO:0045309                            | protein phosphorylated amino acid binding                        | 1                                          | 39                    | 0.021994828 |
| GO:0000059                            | protein import into nucleus, docking                             | 1                                          | 39                    | 0.023784289 |
| GO:0006631                            | fatty acid metabolic process                                     | 1                                          | 39                    | 0.023784289 |
| GO:0009073                            | aromatic amino acid family biosynthetic process                  | 1                                          | 39                    | 0.023784289 |
| GO:0004028                            | 3-chloroallyl aldehyde dehydrogenase activity                    | 1                                          | 39                    | 0.02556715  |
| GO:0048868                            | pollen tube development                                          | 1                                          | 39                    | 0.027343427 |
| GO:0009508                            | plastid chromosome                                               | 1                                          | 39                    | 0.02911314  |
| GO:0052544                            | callose deposition in cell wall during defense response          | 1                                          | 39                    | 0.02911314  |
| GO:0005635                            | nuclear envelope                                                 | 1                                          | 39                    | 0.030876306 |
| GO:0006807                            | nitrogen compound metabolic process                              | 1                                          | 39                    | 0.032632941 |
| GO:0009411                            | response to UV                                                   | 1                                          | 39                    | 0.032632941 |
| GO:0010193                            | response to ozone                                                | 1                                          | 39                    | 0.034383064 |
| GO:0019761                            | glucosinolate biosynthetic process                               | 1                                          | 39                    | 0.034383064 |
| GO:0005839                            | proteasome core complex                                          | 1                                          | 39                    | 0.036126692 |
| GO:0009707                            | chloroplast outer membrane                                       | 1                                          | 39                    | 0.039594532 |
| GO:0005773                            | vacuole                                                          | 3                                          | 39                    | 0.040352863 |
| GO:0005643                            | nuclear pore                                                     | 1                                          | 39                    | 0.041318779 |
| GO:0005840                            | ribosome                                                         | 2                                          | 39                    | 0.041467152 |
| GO:0009295                            | nucleoid                                                         | 1                                          | 39                    | 0.044748014 |
| GO:0009816                            | defense response to bacterium, incompatible interaction          | 1                                          | 39                    | 0.044748014 |
| GO:0006457                            | protein folding                                                  | 2                                          | 39                    | 0.049203175 |
| GO:0016788                            | hydrolase activity, acting on ester bonds                        | 1                                          | 39                    | 0.054882875 |
| GO:0006839                            | mitochondrial transport                                          | 1                                          | 39                    | 0.072878059 |
| GO:0005783                            | endoplasmic reticulum                                            | 2                                          | 39                    | 0.074497173 |
| GO:0006855                            | multidrug transport                                              | 1                                          | 39                    | 0.077656704 |
| GO:0008233                            | peptidase activity                                               | 1                                          | 39                    | 0.079237452 |
| GO:0006633                            | fatty acid biosynthetic process                                  | 1                                          | 39                    | 0.080812162 |
| GO:0003735                            | structural constituent of ribosome                               | 2                                          | 39                    | 0.082707883 |
| GO:0006412                            | translation                                                      | 2                                          | 39                    | 0.087936908 |
| GO:0009555                            | pollen development                                               | 1                                          | 39                    | 0.090134511 |
| GO:0050832                            | defense response to fungus                                       | 1                                          | 39                    | 0.090134511 |
| GO:0005618                            | cell wall                                                        | 2                                          | 39                    | 0.090997636 |
| GO:0051726                            | regulation of cell cycle                                         | 1                                          | 39                    | 0.096230685 |
| GO:0046658                            | anchored to plasma membrane                                      | 1                                          | 39                    | 0.100741215 |
| GO:0003743                            | translation initiation factor activity                           | 1                                          | 39                    | 0.115400811 |
| GO:0008565                            | protein transporter activity                                     | 1                                          | 39                    | 0.116835399 |
| GO:0009908                            | flower development                                               | 1                                          | 39                    | 0.118264346 |
| GO:0005743                            | mitochondrial inner membrane                                     | 1                                          | 39                    | 0.12251749  |
| GO:0046872                            | metal ion binding                                                | 1                                          | 39                    | 0.128110296 |
| GO:0022627                            | cytosolic small ribosomal subunit                                | 1                                          | 39                    | 0.129494661 |
| GO:0015031                            | protein transport                                                | 1                                          | 39                    | 0.133614792 |
| GO:0042626                            | ATPase activity, coupled to transmembrane movement of substances | 1                                          | 39                    | 0.139031943 |
| GO:0005737                            | cytoplasm                                                        | 2                                          | 39                    | 0.143323703 |
| GO:0042254                            | ribosome biogenesis                                              | 1                                          | 39                    | 0.146995986 |
| GO:0005488                            | binding                                                          | 2                                          | 39                    | 0.151172997 |
| GO:0022625                            | cytosolic large ribosomal subunit                                | 1                                          | 39                    | 0.156045949 |
| GO:0051082                            | unfolded protein binding                                         | 1                                          | 39                    | 0.156045949 |
| GO:0005507                            | copper ion binding                                               | 1                                          | 39                    | 0.163599721 |
| GO:0009753                            | response to jasmonic acid stimulus                               | 1                                          | 39                    | 0.172179569 |

| Cluster 29<br>GO identifier<br>(con.) | Description                                                      | #<br>Associated<br>to the GO<br>in Cluster | Total # in<br>Cluster | p-value     |
|---------------------------------------|------------------------------------------------------------------|--------------------------------------------|-----------------------|-------------|
| GO:0007169                            | transmembrane receptor protein tyrosine kinase signaling pathway | 1                                          | 39                    | 0.189742029 |
| GO:0042742                            | defense response to bacterium                                    | 1                                          | 39                    | 0.196460889 |
| GO:0005829                            | cytosol                                                          | 1                                          | 39                    | 0.235168883 |
| GO:0004674                            | protein serine/threonine kinase activity                         | 1                                          | 39                    | 0.237030008 |
| GO:0005525                            | GTP binding                                                      | 1                                          | 39                    | 0.237954219 |
| GO:0031225                            | anchored to membrane                                             | 1                                          | 39                    | 0.263772531 |
| GO:0005730                            | nucleolus                                                        | 1                                          | 39                    | 0.288160691 |
| GO:0009505                            | plant-type cell wall                                             | 1                                          | 39                    | 0.288160691 |
| GO:0009793                            | embryonic development ending in seed dormancy                    | 1                                          | 39                    | 0.313170388 |
| GO:0006810                            | transport                                                        | 1                                          | 39                    | 0.332525229 |
| GO:0006952                            | defense response                                                 | 1                                          | 39                    | 0.335444077 |
| GO:0003676                            | nucleic acid binding                                             | 1                                          | 39                    | 0.339003474 |
| GO:0006499                            | N-terminal protein myristoylation                                | 1                                          | 39                    | 0.343420557 |
| GO:0005622                            | intracellular                                                    | 1                                          | 39                    | 0.356108996 |

### Cluster 29

| <u>GO Identifier</u> | <u>#Loci</u> | <u>Associated Loci (Left to Right)</u> |           |           |           |           |           |
|----------------------|--------------|----------------------------------------|-----------|-----------|-----------|-----------|-----------|
| GO:0000059           | 1            | AT5G53480                              |           |           |           |           |           |
| GO:0002213           | 1            | AT4G23100                              |           |           |           |           |           |
| GO:0003676           | 1            | AT1G50200                              |           |           |           |           |           |
| GO:0003735           | 2            | AT1G18540                              | AT3G04920 |           |           |           |           |
| GO:0003743           | 1            | AT5G36230                              |           |           |           |           |           |
| GO:0003856           | 1            | AT5G66120                              |           |           |           |           |           |
| GO:0003985           | 1            | AT5G48230                              |           |           |           |           |           |
| GO:0004028           | 1            | AT3G66658                              |           |           |           |           |           |
| GO:0004161           | 1            | AT5G47770                              |           |           |           |           |           |
| GO:0004337           | 1            | AT5G47770                              |           |           |           |           |           |
| GO:0004357           | 1            | AT4G23100                              |           |           |           |           |           |
| GO:0004399           | 1            | AT5G63890                              |           |           |           |           |           |
| GO:0004467           | 1            | AT1G77590                              |           |           |           |           |           |
| GO:0004674           | 1            | AT5G16590                              |           |           |           |           |           |
| GO:0004739           | 1            | AT2G34590                              |           |           |           |           |           |
| GO:0004766           | 1            | AT1G23820                              |           |           |           |           |           |
| GO:0004802           | 1            | AT2G34590                              |           |           |           |           |           |
| GO:0004813           | 1            | AT1G50200                              |           |           |           |           |           |
| GO:0005093           | 1            | AT3G59920                              |           |           |           |           |           |
| GO:0005488           | 2            | AT2G20580                              | AT5G15640 |           |           |           |           |
| GO:0005507           | 1            | AT5G15350                              |           |           |           |           |           |
| GO:0005524           | 5            | AT1G50200                              | AT3G03960 | AT3G09440 | AT5G16050 | AT5G16590 |           |
| GO:0005525           | 1            | AT5G05000                              |           |           |           |           |           |
| GO:0005618           | 2            | AT3G09440                              | AT5G16050 |           |           |           |           |
| GO:0005622           | 1            | AT1G18540                              |           |           |           |           |           |
| GO:0005635           | 1            | AT5G16050                              |           |           |           |           |           |
| GO:0005643           | 1            | AT5G53480                              |           |           |           |           |           |
| GO:0005697           | 1            | AT1G14410                              |           |           |           |           |           |
| GO:0005730           | 1            | AT3G04920                              |           |           |           |           |           |
| GO:0005737           | 2            | AT5G16050                              | AT5G53480 |           |           |           |           |
| GO:0005739           | 7            | AT1G50200                              | AT1G77590 | AT2G16460 | AT5G05000 | AT5G12860 | AT5G15640 |
|                      |              | AT5G16050                              |           |           |           |           |           |
| GO:0005743           | 1            | AT5G15640                              |           |           |           |           |           |
| GO:0005773           | 3            | AT3G09440                              | AT3G22110 | AT5G15350 |           |           |           |
| GO:0005777           | 2            | AT2G31670                              | AT5G48230 |           |           |           |           |
| GO:0005783           | 2            | AT1G18540                              | AT3G66658 |           |           |           |           |

**Cluster 29 (con.)**

| <b>GO Identifier</b> | <b>#Loci</b> | <b>Associated Loci (Left to Right)</b> |           |           |           |           |           |  |
|----------------------|--------------|----------------------------------------|-----------|-----------|-----------|-----------|-----------|--|
| GO:0005829           | 1            | AT3G09440                              |           |           |           |           |           |  |
| GO:0005839           | 1            | AT3G22110                              |           |           |           |           |           |  |
| GO:0005840           | 2            | AT1G18540                              | AT3G04920 |           |           |           |           |  |
| GO:0005886           | 11           | AT1G15210                              | AT1G18540 | AT2G16460 | AT2G20580 | AT3G04920 | AT3G09440 |  |
|                      |              | AT4G24820                              | AT5G15350 | AT5G16050 | AT5G16590 | AT5G48230 |           |  |
| GO:0006412           | 2            | AT1G18540                              | AT3G04920 |           |           |           |           |  |
| GO:0006419           | 1            | AT1G50200                              |           |           |           |           |           |  |
| GO:0006446           | 1            | AT5G36230                              |           |           |           |           |           |  |
| GO:0006457           | 2            | AT3G03960                              | AT3G09440 |           |           |           |           |  |
| GO:0006499           | 1            | AT5G12860                              |           |           |           |           |           |  |
| GO:0006511           | 3            | AT2G20580                              | AT3G22110 | AT4G24820 |           |           |           |  |
| GO:0006631           | 1            | AT1G77590                              |           |           |           |           |           |  |
| GO:0006633           | 1            | AT1G77590                              |           |           |           |           |           |  |
| GO:0006750           | 1            | AT4G23100                              |           |           |           |           |           |  |
| GO:0006807           | 1            | AT5G12040                              |           |           |           |           |           |  |
| GO:0006810           | 1            | AT5G15640                              |           |           |           |           |           |  |
| GO:0006839           | 1            | AT5G15640                              |           |           |           |           |           |  |
| GO:0006855           | 1            | AT1G15210                              |           |           |           |           |           |  |
| GO:0006952           | 1            | AT1G14410                              |           |           |           |           |           |  |
| GO:0007169           | 1            | AT5G16590                              |           |           |           |           |           |  |
| GO:0008233           | 1            | AT3G22110                              |           |           |           |           |           |  |
| GO:0008295           | 1            | AT1G23820                              |           |           |           |           |           |  |
| GO:0008540           | 1            | AT2G20580                              |           |           |           |           |           |  |
| GO:0008541           | 1            | AT4G24820                              |           |           |           |           |           |  |
| GO:0008565           | 1            | AT5G53480                              |           |           |           |           |           |  |
| GO:0009073           | 1            | AT5G66120                              |           |           |           |           |           |  |
| GO:0009295           | 1            | AT1G14410                              |           |           |           |           |           |  |
| GO:0009408           | 2            | AT3G09440                              | AT4G23100 |           |           |           |           |  |
| GO:0009411           | 1            | AT5G63890                              |           |           |           |           |           |  |
| GO:0009505           | 1            | AT5G16590                              |           |           |           |           |           |  |
| GO:0009507           | 17           | AT1G14410                              | AT1G15210 | AT1G18540 | AT1G50200 | AT1G77590 | AT2G31670 |  |
|                      |              | AT2G34590                              | AT3G04920 | AT3G09440 | AT4G23100 | AT5G05000 | AT5G12040 |  |
|                      |              | AT5G12860                              | AT5G53480 | AT5G63890 | AT5G64290 | AT5G66120 |           |  |
| GO:0009508           | 1            | AT1G14410                              |           |           |           |           |           |  |
| GO:0009536           | 3            | AT1G77590                              | AT5G05000 | AT5G12860 |           |           |           |  |
| GO:0009555           | 1            | AT5G63890                              |           |           |           |           |           |  |
| GO:0009570           | 4            | AT2G31670                              | AT4G23100 | AT5G16050 | AT5G63890 |           |           |  |
| GO:0009610           | 1            | AT5G16590                              |           |           |           |           |           |  |
| GO:0009624           | 2            | AT5G12860                              | AT5G64290 |           |           |           |           |  |
| GO:0009700           | 1            | AT4G23100                              |           |           |           |           |           |  |
| GO:0009707           | 1            | AT5G05000                              |           |           |           |           |           |  |
| GO:0009753           | 1            | AT4G23100                              |           |           |           |           |           |  |
| GO:0009793           | 1            | AT5G48230                              |           |           |           |           |           |  |
| GO:0009816           | 1            | AT4G23100                              |           |           |           |           |           |  |
| GO:0009908           | 1            | AT4G23100                              |           |           |           |           |           |  |
| GO:0009941           | 5            | AT1G77590                              | AT2G34590 | AT5G05000 | AT5G12860 | AT5G64290 |           |  |
| GO:0010193           | 1            | AT4G23100                              |           |           |           |           |           |  |
| GO:0015031           | 1            | AT3G59920                              |           |           |           |           |           |  |
| GO:0015367           | 2            | AT5G12860                              | AT5G64290 |           |           |           |           |  |
| GO:0015743           | 2            | AT5G12860                              | AT5G64290 |           |           |           |           |  |
| GO:0016020           | 10           | AT1G15210                              | AT1G18540 | AT1G77590 | AT3G03960 | AT3G04920 | AT4G24820 |  |
|                      |              | AT5G12860                              | AT5G16590 | AT5G36230 | AT5G64290 |           |           |  |
| GO:0016788           | 1            | AT2G41530                              |           |           |           |           |           |  |
| GO:0016810           | 1            | AT5G12040                              |           |           |           |           |           |  |
| GO:0016876           | 1            | AT1G50200                              |           |           |           |           |           |  |
| GO:0018738           | 1            | AT2G41530                              |           |           |           |           |           |  |
| GO:0019750           | 1            | AT5G05000                              |           |           |           |           |           |  |
| GO:0019761           | 1            | AT4G23100                              |           |           |           |           |           |  |
| GO:0022625           | 1            | AT1G18540                              |           |           |           |           |           |  |

**Cluster 29 (con.)**

| <b>GO Identifier</b> | <b>#Loci</b> | <b>Associated Loci (Left to Right)</b> |           |           |           |           |           |
|----------------------|--------------|----------------------------------------|-----------|-----------|-----------|-----------|-----------|
| GO:0022626           | 4            | AT1G18540                              | AT3G04920 | AT3G09440 | AT3G22110 |           |           |
| GO:0022627           | 1            | AT3G04920                              |           |           |           |           |           |
| GO:0030163           | 2            | AT2G20580                              | AT4G24820 |           |           |           |           |
| GO:0031225           | 1            | AT5G15350                              |           |           |           |           |           |
| GO:0032211           | 1            | AT1G14410                              |           |           |           |           |           |
| GO:0042162           | 1            | AT1G14410                              |           |           |           |           |           |
| GO:0042254           | 1            | AT3G04920                              |           |           |           |           |           |
| GO:0042626           | 1            | AT1G15210                              |           |           |           |           |           |
| GO:0042742           | 1            | AT4G23100                              |           |           |           |           |           |
| GO:0044267           | 1            | AT3G03960                              |           |           |           |           |           |
| GO:0045036           | 1            | AT5G05000                              |           |           |           |           |           |
| GO:0045309           | 1            | AT5G16050                              |           |           |           |           |           |
| GO:0045337           | 1            | AT5G47770                              |           |           |           |           |           |
| GO:0046537           | 1            | AT3G08590                              |           |           |           |           |           |
| GO:0046658           | 1            | AT5G15350                              |           |           |           |           |           |
| GO:0046686           | 7            | AT1G50200                              | AT2G41530 | AT3G08590 | AT3G09440 | AT3G22110 | AT4G23100 |
| GO:0046872           | 1            | AT5G16050                              |           |           |           |           |           |
| GO:0048046           | 3            | AT2G16460                              | AT2G41530 |           | AT3G08590 |           |           |
| GO:0048868           | 1            | AT3G09440                              |           |           |           |           |           |
| GO:0050832           | 1            | AT2G34590                              |           |           |           |           |           |
| GO:0051082           | 1            | AT4G23100                              |           |           |           |           |           |
| GO:0051726           | 1            | AT3G03960                              |           |           |           |           |           |
| GO:0052544           | 1            | AT2G20580                              |           |           |           |           |           |
|                      |              | AT4G23100                              |           |           |           |           |           |

**Cluster 30**

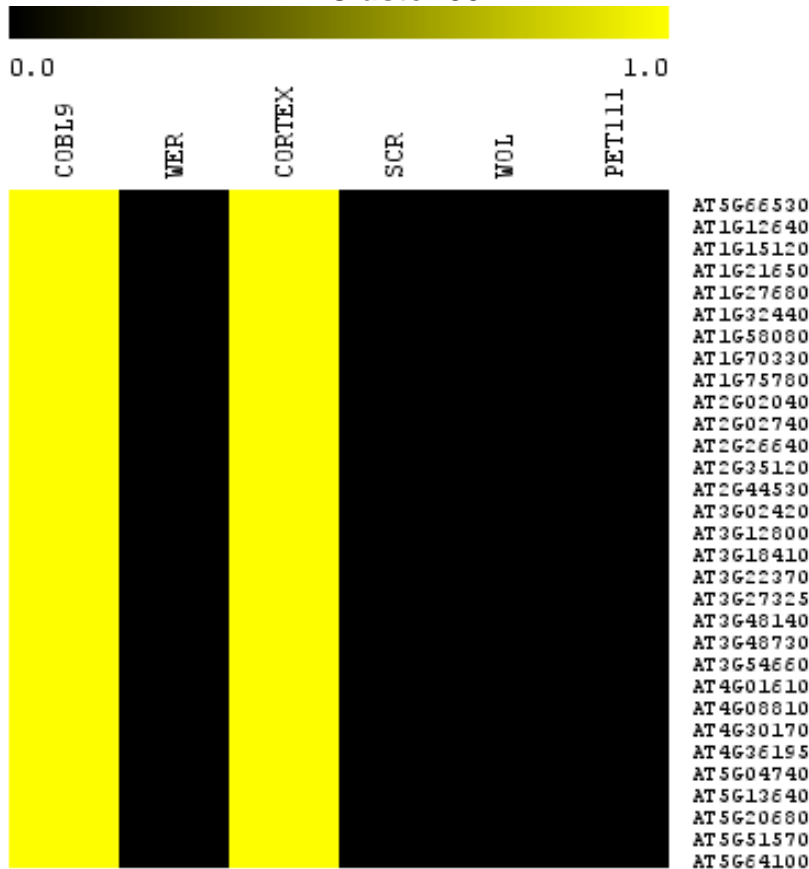



**Cluster 30**

AT1G12640  
 AT1G15120  
 AT1G21650  
 AT1G27680  
 AT1G32440  
 AT1G58080  
 AT1G70330  
 AT1G75780  
 AT2G02040  
 AT2G02740  
 AT2G26640  
 AT2G35120  
 AT2G44530  
 AT3G02420  
 AT3G12800  
 AT3G18410  
 AT3G22370  
 AT3G27325  
 AT3G48140  
 AT3G48730  
 AT3G54660  
 AT4G01610  
 AT4G08810  
 AT4G30170  
 AT4G36195  
 AT5G04740  
 AT5G13640  
 AT5G20680  
 AT5G51570  
 AT5G64100  
 AT5G66530

| Cluster 30<br>GO identifier | Description                                                                     | #<br>Associated<br>to the GO<br>in Cluster | Total # in<br>Cluster | p-value     |
|-----------------------------|---------------------------------------------------------------------------------|--------------------------------------------|-----------------------|-------------|
| GO:0009570                  | chloroplast stroma                                                              | 5                                          | 31                    | 1.50E-04    |
| GO:0005773                  | vacuole                                                                         | 5                                          | 31                    | 4.14E-04    |
| GO:0010174                  | nucleoside transmembrane transporter activity, against a concentration gradient | 1                                          | 31                    | 0.001486454 |
| GO:0015197                  | peptide transporter activity                                                    | 1                                          | 31                    | 0.001486454 |
| GO:0015334                  | high affinity oligopeptide transporter activity                                 | 1                                          | 31                    | 0.001486454 |
| GO:0015833                  | peptide transport                                                               | 1                                          | 31                    | 0.001486454 |
| GO:0003879                  | ATP phosphoribosyltransferase activity                                          | 1                                          | 31                    | 0.002968631 |
| GO:0004362                  | glutathione-disulfide reductase activity                                        | 1                                          | 31                    | 0.002968631 |
| GO:0006749                  | glutathione metabolic process                                                   | 1                                          | 31                    | 0.002968631 |
| GO:0042286                  | glutamate-1-semialdehyde 2,1-aminomutase activity                               | 1                                          | 31                    | 0.002968631 |
| GO:0045333                  | cellular respiration                                                            | 1                                          | 31                    | 0.002968631 |
| GO:0008415                  | acyltransferase activity                                                        | 2                                          | 31                    | 0.003379379 |
| GO:0004601                  | peroxidase activity                                                             | 2                                          | 31                    | 0.004195379 |
| GO:0006505                  | GPI anchor metabolic process                                                    | 1                                          | 31                    | 0.004446541 |
| GO:0042937                  | tripeptide transporter activity                                                 | 1                                          | 31                    | 0.004446541 |
| GO:0042939                  | tripeptide transport                                                            | 1                                          | 31                    | 0.004446541 |

| Cluster 30<br>GO identifier<br>(con.) | Description                                                 | #<br>Associated<br>to the GO<br>in Cluster | Total # in<br>Cluster | p-value     |
|---------------------------------------|-------------------------------------------------------------|--------------------------------------------|-----------------------|-------------|
| GO:0004749                            | ribose phosphate diphosphokinase activity                   | 1                                          | 31                    | 0.005920192 |
| GO:0005960                            | glycine cleavage complex                                    | 1                                          | 31                    | 0.005920192 |
| GO:0042936                            | dipeptide transporter activity                              | 1                                          | 31                    | 0.005920192 |
| GO:0042938                            | dipeptide transport                                         | 1                                          | 31                    | 0.005920192 |
| GO:0004375                            | glycine dehydrogenase (decarboxylating) activity            | 1                                          | 31                    | 0.007389592 |
| GO:0009165                            | nucleotide biosynthetic process                             | 1                                          | 31                    | 0.007389592 |
| GO:0004607                            | phosphatidylcholine-sterol O-acyltransferase activity       | 1                                          | 31                    | 0.008854752 |
| GO:0005337                            | nucleoside transmembrane transporter activity               | 1                                          | 31                    | 0.008854752 |
| GO:0006122                            | mitochondrial electron transport, ubiquinol to cytochrome c | 1                                          | 31                    | 0.008854752 |
| GO:0006546                            | glycine catabolic process                                   | 1                                          | 31                    | 0.008854752 |
| GO:0008878                            | glucose-1-phosphate adenylyltransferase activity            | 1                                          | 31                    | 0.008854752 |
| GO:0009916                            | alternative oxidase activity                                | 1                                          | 31                    | 0.008854752 |
| GO:0000105                            | histidine biosynthetic process                              | 1                                          | 31                    | 0.010315679 |
| GO:0009416                            | response to light stimulus                                  | 2                                          | 31                    | 0.010474261 |
| GO:0006886                            | intracellular protein transport                             | 2                                          | 31                    | 0.012165262 |
| GO:0009507                            | chloroplast                                                 | 8                                          | 31                    | 0.01276041  |
| GO:0008121                            | ubiquinol-cytochrome-c reductase activity                   | 1                                          | 31                    | 0.013224871 |
| GO:0004743                            | pyruvate kinase activity                                    | 1                                          | 31                    | 0.014673155 |
| GO:0019252                            | starch biosynthetic process                                 | 1                                          | 31                    | 0.014673155 |
| GO:0055114                            | oxidation reduction                                         | 1                                          | 31                    | 0.014673155 |
| GO:0003824                            | catalytic activity                                          | 3                                          | 31                    | 0.015141447 |
| GO:0004034                            | aldose 1-epimerase activity                                 | 1                                          | 31                    | 0.016117241 |
| GO:0015112                            | nitrate transmembrane transporter activity                  | 1                                          | 31                    | 0.016117241 |
| GO:0006012                            | galactose metabolic process                                 | 1                                          | 31                    | 0.018992857 |
| GO:0005750                            | mitochondrial respiratory chain complex III                 | 1                                          | 31                    | 0.020424405 |
| GO:0006779                            | porphyrin biosynthetic process                              | 1                                          | 31                    | 0.020424405 |
| GO:0005739                            | mitochondrion                                               | 4                                          | 31                    | 0.021030147 |
| GO:0009508                            | plastid chromosome                                          | 1                                          | 31                    | 0.023275023 |
| GO:0016597                            | amino acid binding                                          | 1                                          | 31                    | 0.023275023 |
| GO:0005886                            | plasma membrane                                             | 6                                          | 31                    | 0.023980792 |
| GO:0009409                            | response to cold                                            | 2                                          | 31                    | 0.028982421 |
| GO:0006979                            | response to oxidative stress                                | 2                                          | 31                    | 0.030062861 |
| GO:0010150                            | leaf senescence                                             | 1                                          | 31                    | 0.033122087 |
| GO:0009295                            | nucleoid                                                    | 1                                          | 31                    | 0.035898647 |
| GO:0000325                            | plant-type vacuole                                          | 1                                          | 31                    | 0.040033007 |
| GO:0016788                            | hydrolase activity, acting on ester bonds                   | 1                                          | 31                    | 0.044130994 |
| GO:0005524                            | ATP binding                                                 | 3                                          | 31                    | 0.051549046 |
| GO:0005783                            | endoplasmic reticulum                                       | 2                                          | 31                    | 0.051753698 |
| GO:0005774                            | vacuolar membrane                                           | 1                                          | 31                    | 0.056209003 |
| GO:0005198                            | structural molecule activity                                | 1                                          | 31                    | 0.05753119  |
| GO:0006096                            | glycolysis                                                  | 1                                          | 31                    | 0.060163778 |
| GO:0006633                            | fatty acid biosynthetic process                             | 1                                          | 31                    | 0.065382032 |
| GO:0009826                            | unidimensional cell growth                                  | 1                                          | 31                    | 0.104935291 |
| GO:0006950                            | response to stress                                          | 1                                          | 31                    | 0.111930276 |
| GO:0005777                            | peroxisome                                                  | 1                                          | 31                    | 0.140773345 |
| GO:0008152                            | metabolic process                                           | 2                                          | 31                    | 0.151686486 |
| GO:0009536                            | plastid                                                     | 1                                          | 31                    | 0.160395992 |
| GO:0006629                            | lipid metabolic process                                     | 1                                          | 31                    | 0.176008496 |
| GO:0016020                            | membrane                                                    | 3                                          | 31                    | 0.185092935 |
| GO:0005215                            | transporter activity                                        | 1                                          | 31                    | 0.241117538 |
| GO:0016491                            | oxidoreductase activity                                     | 1                                          | 31                    | 0.242563381 |
| GO:0048046                            | apoplast                                                    | 1                                          | 31                    | 0.253075467 |

| Cluster 30<br>GO identifier<br>(con.) | Description                       | #<br>Associated<br>to the GO<br>in Cluster | Total # in<br>Cluster | p-value     |
|---------------------------------------|-----------------------------------|--------------------------------------------|-----------------------|-------------|
| GO:0009535                            | chloroplast thylakoid membrane    | 1                                          | 31                    | 0.257784351 |
| GO:0005618                            | cell wall                         | 1                                          | 31                    | 0.290671562 |
| GO:0006810                            | transport                         | 1                                          | 31                    | 0.298948489 |
| GO:0006952                            | defense response                  | 1                                          | 31                    | 0.30239758  |
| GO:0006508                            | proteolysis                       | 1                                          | 31                    | 0.307611521 |
| GO:0006499                            | N-terminal protein myristoylation | 1                                          | 31                    | 0.312137664 |
| GO:0009941                            | chloroplast envelope              | 1                                          | 31                    | 0.321801347 |
| GO:0005488                            | binding                           | 1                                          | 31                    | 0.34613426  |

### Cluster 30

| <u>GO Identifier</u> | <u>#Loci</u> | <u>Associated Loci (Left to Right)</u> |           |           |           |           |           |
|----------------------|--------------|----------------------------------------|-----------|-----------|-----------|-----------|-----------|
| GO:0000105           | 1            | AT1G58080                              |           |           |           |           |           |
| GO:0000325           | 1            | AT2G02040                              |           |           |           |           |           |
| GO:0003824           | 3            | AT2G26640                              | AT3G12800 | AT3G27325 |           |           |           |
| GO:0003879           | 1            | AT1G58080                              |           |           |           |           |           |
| GO:0004034           | 1            | AT5G66530                              |           |           |           |           |           |
| GO:0004362           | 1            | AT3G54660                              |           |           |           |           |           |
| GO:0004375           | 1            | AT2G35120                              |           |           |           |           |           |
| GO:0004601           | 2            | AT4G30170                              | AT5G64100 |           |           |           |           |
| GO:0004607           | 1            | AT5G13640                              |           |           |           |           |           |
| GO:0004743           | 1            | AT1G32440                              |           |           |           |           |           |
| GO:0004749           | 1            | AT2G44530                              |           |           |           |           |           |
| GO:0005198           | 1            | AT1G75780                              |           |           |           |           |           |
| GO:0005215           | 1            | AT2G02040                              |           |           |           |           |           |
| GO:0005337           | 1            | AT1G70330                              |           |           |           |           |           |
| GO:0005488           | 1            | AT3G12800                              |           |           |           |           |           |
| GO:0005524           | 3            | AT1G21650                              | AT2G35120 | AT3G54660 |           |           |           |
| GO:0005618           | 1            | AT5G64100                              |           |           |           |           |           |
| GO:0005739           | 4            | AT1G15120                              | AT2G35120 | AT3G22370 | AT3G54660 |           |           |
| GO:0005750           | 1            | AT1G15120                              |           |           |           |           |           |
| GO:0005773           | 5            | AT1G75780                              | AT2G02040 | AT4G01610 | AT5G13640 | AT5G51570 |           |
| GO:0005774           | 1            | AT2G02040                              |           |           |           |           |           |
| GO:0005777           | 1            | AT3G12800                              |           |           |           |           |           |
| GO:0005783           | 2            | AT3G27325                              | AT5G13640 |           |           |           |           |
| GO:0005886           | 6            | AT1G12640                              | AT1G70330 | AT2G02040 | AT3G12800 | AT3G27325 | AT5G51570 |
| GO:0005960           | 1            | AT2G35120                              |           |           |           |           |           |
| GO:0006012           | 1            | AT5G66530                              |           |           |           |           |           |
| GO:0006096           | 1            | AT1G32440                              |           |           |           |           |           |
| GO:0006122           | 1            | AT1G15120                              |           |           |           |           |           |
| GO:0006499           | 1            | AT5G51570                              |           |           |           |           |           |
| GO:0006505           | 1            | AT3G27325                              |           |           |           |           |           |
| GO:0006508           | 1            | AT4G01610                              |           |           |           |           |           |
| GO:0006546           | 1            | AT2G35120                              |           |           |           |           |           |
| GO:0006629           | 1            | AT5G13640                              |           |           |           |           |           |
| GO:0006633           | 1            | AT1G32440                              |           |           |           |           |           |
| GO:0006749           | 1            | AT3G54660                              |           |           |           |           |           |
| GO:0006779           | 1            | AT3G48730                              |           |           |           |           |           |
| GO:0006810           | 1            | AT1G70330                              |           |           |           |           |           |
| GO:0006886           | 2            | AT1G21650                              | AT3G27325 |           |           |           |           |
| GO:0006950           | 1            | AT3G22370                              |           |           |           |           |           |
| GO:0006952           | 1            | AT2G02740                              |           |           |           |           |           |
| GO:0006979           | 2            | AT4G30170                              | AT5G64100 |           |           |           |           |
| GO:0008121           | 1            | AT1G15120                              |           |           |           |           |           |
| GO:0008152           | 2            | AT3G12800                              | AT5G04740 |           |           |           |           |
| GO:0008415           | 2            | AT1G12640                              | AT2G26640 |           |           |           |           |

**Cluster 30 (con.)**

| <b>GO Identifier</b> | <b>#Loci</b> | <b>Associated Loci (Left to Right)</b> |           |           |           |           |           |
|----------------------|--------------|----------------------------------------|-----------|-----------|-----------|-----------|-----------|
| GO:0008878           | 1            | AT1G27680                              |           |           |           |           |           |
| GO:0009165           | 1            | AT2G44530                              |           |           |           |           |           |
| GO:0009295           | 1            | AT2G02740                              |           |           |           |           |           |
| GO:0009409           | 2            | AT2G26640                              | AT3G22370 |           |           |           |           |
| GO:0009416           | 2            | AT1G75780                              | AT2G26640 |           |           |           |           |
| GO:0009507           | 8            | AT1G32440                              | AT1G58080 | AT2G02740 | AT2G44530 | AT3G48730 | AT3G54660 |
|                      |              | AT5G04740                              | AT5G66530 |           |           |           |           |
| GO:0009508           | 1            | AT2G02740                              |           |           |           |           |           |
| GO:0009535           | 1            | AT5G04740                              |           |           |           |           |           |
| GO:0009536           | 1            | AT3G22370                              |           |           |           |           |           |
| GO:0009570           | 5            | AT1G32440                              | AT3G48730 | AT3G54660 | AT5G04740 | AT5G66530 |           |
| GO:0009826           | 1            | AT1G75780                              |           |           |           |           |           |
| GO:0009916           | 1            | AT3G22370                              |           |           |           |           |           |
| GO:0009941           | 1            | AT3G48730                              |           |           |           |           |           |
| GO:0010150           | 1            | AT3G48140                              |           |           |           |           |           |
| GO:0010174           | 1            | AT1G70330                              |           |           |           |           |           |
| GO:0015112           | 1            | AT2G02040                              |           |           |           |           |           |
| GO:0015197           | 1            | AT2G02040                              |           |           |           |           |           |
| GO:0015334           | 1            | AT2G02040                              |           |           |           |           |           |
| GO:0015833           | 1            | AT2G02040                              |           |           |           |           |           |
| GO:0016020           | 3            | AT1G12640                              | AT1G21650 | AT3G02420 |           |           |           |
| GO:0016491           | 1            | AT3G12800                              |           |           |           |           |           |
| GO:0016597           | 1            | AT5G04740                              |           |           |           |           |           |
| GO:0016788           | 1            | AT3G27325                              |           |           |           |           |           |
| GO:0019252           | 1            | AT1G27680                              |           |           |           |           |           |
| GO:0042286           | 1            | AT3G48730                              |           |           |           |           |           |
| GO:0042936           | 1            | AT2G02040                              |           |           |           |           |           |
| GO:0042937           | 1            | AT2G02040                              |           |           |           |           |           |
| GO:0042938           | 1            | AT2G02040                              |           |           |           |           |           |
| GO:0042939           | 1            | AT2G02040                              |           |           |           |           |           |
| GO:0045333           | 1            | AT3G22370                              |           |           |           |           |           |
| GO:0048046           | 1            | AT5G66530                              |           |           |           |           |           |
| GO:0055114           | 1            | AT3G22370                              |           |           |           |           |           |

### Cluster 31

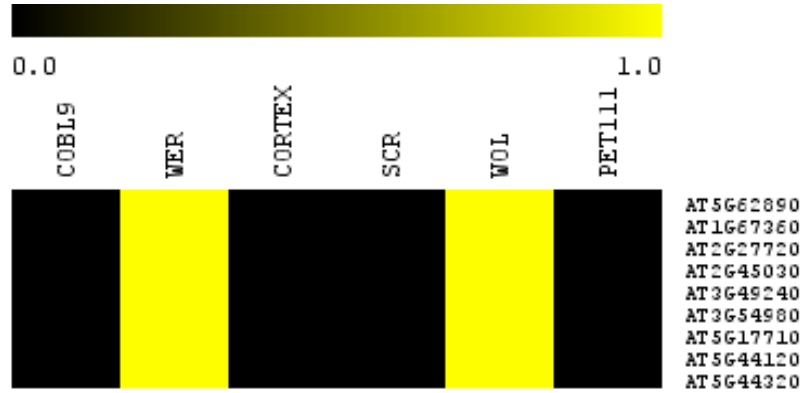

### Cluster 31

AT1G67360  
 AT2G27720  
 AT2G45030  
 AT3G49240  
 AT3G54980  
 AT5G17710  
 AT5G44120  
 AT5G44320  
 AT5G62890

| Cluster 31<br>GO identifier | Description                                   | #<br>Associated<br>to the GO<br>in Cluster | Total # in<br>Cluster | p-value     |
|-----------------------------|-----------------------------------------------|--------------------------------------------|-----------------------|-------------|
| GO:0000774                  | adenyl-nucleotide exchange factor activity    | 1                                          | 9                     | 0.00129366  |
| GO:0051087                  | chaperone binding                             | 1                                          | 9                     | 0.003443148 |
| GO:0009793                  | embryonic development ending in seed dormancy | 2                                          | 9                     | 0.005846459 |
| GO:0022857                  | transmembrane transporter activity            | 1                                          | 9                     | 0.006438578 |
| GO:0006414                  | translational elongation                      | 1                                          | 9                     | 0.009417898 |
| GO:0005773                  | vacuole                                       | 2                                          | 9                     | 0.013955281 |
| GO:0042803                  | protein homodimerization activity             | 1                                          | 9                     | 0.017423865 |
| GO:0045735                  | nutrient reservoir activity                   | 1                                          | 9                     | 0.022005287 |
| GO:0006413                  | translational initiation                      | 1                                          | 9                     | 0.02324798  |
| GO:0003743                  | translation initiation factor activity        | 1                                          | 9                     | 0.029418037 |
| GO:0022626                  | cytosolic ribosome                            | 1                                          | 9                     | 0.06760475  |
| GO:0009579                  | thylakoid                                     | 1                                          | 9                     | 0.068739397 |
| GO:0005840                  | ribosome                                      | 1                                          | 9                     | 0.07399833  |
| GO:0009409                  | response to cold                              | 1                                          | 9                     | 0.075490004 |
| GO:0006457                  | protein folding                               | 1                                          | 9                     | 0.081408638 |
| GO:0009737                  | response to abscisic acid stimulus            | 1                                          | 9                     | 0.081776008 |
| GO:0016020                  | membrane                                      | 2                                          | 9                     | 0.09283015  |
| GO:0003735                  | structural constituent of ribosome            | 1                                          | 9                     | 0.109867922 |
| GO:0005618                  | cell wall                                     | 1                                          | 9                     | 0.116354759 |
| GO:0006810                  | transport                                     | 1                                          | 9                     | 0.121737915 |
| GO:0009570                  | chloroplast stroma                            | 1                                          | 9                     | 0.133263417 |
| GO:0009507                  | chloroplast                                   | 2                                          | 9                     | 0.196957651 |
| GO:0005524                  | ATP binding                                   | 1                                          | 9                     | 0.211517571 |
| GO:0005739                  | mitochondrion                                 | 1                                          | 9                     | 0.245792749 |
| GO:0005515                  | protein binding                               | 1                                          | 9                     | 0.322438886 |
| GO:0005634                  | nucleus                                       | 1                                          | 9                     | 0.372122789 |
| GO:0012505                  | endomembrane system                           | 1                                          | 9                     | 0.389818186 |

**Cluster 31**

| <b><u>GO Identifier</u></b> | <b><u>#Loci</u></b> | <b><u>Associated Loci (Left to Right)</u></b> |           |
|-----------------------------|---------------------|-----------------------------------------------|-----------|
| GO:0000774                  | 1                   | AT5G17710                                     |           |
| GO:0003735                  | 1                   | AT2G27720                                     |           |
| GO:0003743                  | 1                   | AT5G44320                                     |           |
| GO:0005515                  | 1                   | AT5G17710                                     |           |
| GO:0005524                  | 1                   | AT3G49240                                     |           |
| GO:0005618                  | 1                   | AT5G62890                                     |           |
| GO:0005634                  | 1                   | AT2G27720                                     |           |
| GO:0005739                  | 1                   | AT3G49240                                     |           |
| GO:0005773                  | 2                   | AT1G67360                                     | AT5G62890 |
| GO:0005840                  | 1                   | AT2G27720                                     |           |
| GO:0006413                  | 1                   | AT5G44320                                     |           |
| GO:0006414                  | 1                   | AT2G27720                                     |           |
| GO:0006457                  | 1                   | AT5G17710                                     |           |
| GO:0006810                  | 1                   | AT5G62890                                     |           |
| GO:0009409                  | 1                   | AT2G27720                                     |           |
| GO:0009507                  | 2                   | AT3G49240                                     | AT5G17710 |
| GO:0009570                  | 1                   | AT5G17710                                     |           |
| GO:0009579                  | 1                   | AT5G17710                                     |           |
| GO:0009737                  | 1                   | AT5G44120                                     |           |
| GO:0009793                  | 2                   | AT3G49240                                     | AT5G17710 |
| GO:0012505                  | 1                   | AT5G44120                                     |           |
| GO:0016020                  | 2                   | AT2G27720                                     | AT5G62890 |
| GO:0022626                  | 1                   | AT2G27720                                     |           |
| GO:0022857                  | 1                   | AT5G62890                                     |           |
| GO:0042803                  | 1                   | AT5G17710                                     |           |
| GO:0045735                  | 1                   | AT5G44120                                     |           |
| GO:0051087                  | 1                   | AT5G17710                                     |           |

### Cluster 32

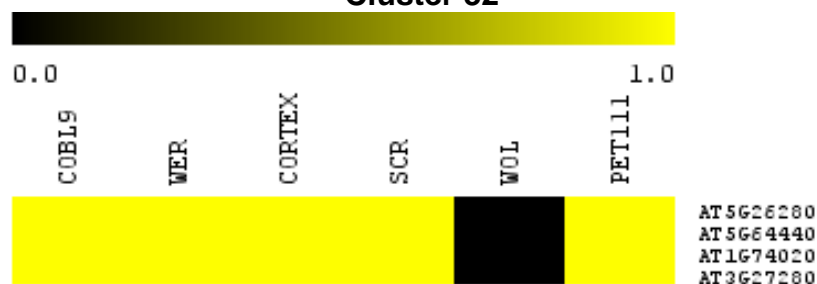

**Cluster 32**  
 AT1G74020  
 AT3G27280  
 AT5G26280  
 AT5G64440

| Cluster 32<br>GO identifier | Description                                        | #<br>Associated<br>to the GO<br>in Cluster | Total # in<br>Cluster | p-value     |
|-----------------------------|----------------------------------------------------|--------------------------------------------|-----------------------|-------------|
| GO:0005773                  | vacuole                                            | 3                                          | 4                     | 3.73E-05    |
| GO:0047412                  | N-(long-chain-acyl)ethanolamine deacylase activity | 1                                          | 4                     | 1.92E-04    |
| GO:0004040                  | amidase activity                                   | 1                                          | 4                     | 9.58E-04    |
| GO:0005886                  | plasma membrane                                    | 3                                          | 4                     | 0.001883287 |
| GO:0016844                  | strictosidine synthase activity                    | 1                                          | 4                     | 0.002680189 |
| GO:0045271                  | respiratory chain complex I                        | 1                                          | 4                     | 0.007059929 |
| GO:0006950                  | response to stress                                 | 1                                          | 4                     | 0.016106822 |
| GO:0009611                  | response to wounding                               | 1                                          | 4                     | 0.020211282 |
| GO:0009753                  | response to jasmonic acid stimulus                 | 1                                          | 4                     | 0.021326112 |
| GO:0042742                  | defense response to bacterium                      | 1                                          | 4                     | 0.025212634 |
| GO:0009505                  | plant-type cell wall                               | 1                                          | 4                     | 0.044109724 |
| GO:0005783                  | endoplasmic reticulum                              | 1                                          | 4                     | 0.048921054 |
| GO:0005739                  | mitochondrion                                      | 1                                          | 4                     | 0.131791079 |
| GO:0016020                  | membrane                                           | 1                                          | 4                     | 0.209989764 |
| GO:0009507                  | chloroplast                                        | 1                                          | 4                     | 0.314011489 |

### Cluster 32

| GO Identifier | #Loci | Associated Loci (Left to Right)     |
|---------------|-------|-------------------------------------|
| GO:0004040    | 1     | AT5G64440                           |
| GO:0005739    | 1     | AT3G27280                           |
| GO:0005773    | 3     | AT1G74020    AT3G27280    AT5G64440 |
| GO:0005783    | 1     | AT5G64440                           |
| GO:0005886    | 3     | AT1G74020    AT3G27280    AT5G64440 |
| GO:0006950    | 1     | AT3G27280                           |
| GO:0009505    | 1     | AT3G27280                           |
| GO:0009507    | 1     | AT3G27280                           |
| GO:0009611    | 1     | AT1G74020                           |
| GO:0009753    | 1     | AT1G74020                           |
| GO:0016020    | 1     | AT5G26280                           |
| GO:0016844    | 1     | AT1G74020                           |
| GO:0042742    | 1     | AT5G64440                           |
| GO:0045271    | 1     | AT3G27280                           |
| GO:0047412    | 1     | AT5G64440                           |

# Cluster 33

| CEN19 | REP | CPT/TEC | SFE | W/L | REF11     |
|-------|-----|---------|-----|-----|-----------|
|       |     |         |     |     | AT8901900 |
|       |     |         |     |     | AT8902700 |
|       |     |         |     |     | AT8903670 |
|       |     |         |     |     | AT8904600 |
|       |     |         |     |     | AT8905500 |
|       |     |         |     |     | AT8906400 |
|       |     |         |     |     | AT8907300 |
|       |     |         |     |     | AT8908200 |
|       |     |         |     |     | AT8909100 |
|       |     |         |     |     | AT8910000 |
|       |     |         |     |     | AT8910900 |
|       |     |         |     |     | AT8911800 |
|       |     |         |     |     | AT8912700 |
|       |     |         |     |     | AT8913600 |
|       |     |         |     |     | AT8914500 |
|       |     |         |     |     | AT8915400 |
|       |     |         |     |     | AT8916300 |
|       |     |         |     |     | AT8917200 |
|       |     |         |     |     | AT8918100 |
|       |     |         |     |     | AT8919000 |
|       |     |         |     |     | AT8919900 |
|       |     |         |     |     | AT8920800 |
|       |     |         |     |     | AT8921700 |
|       |     |         |     |     | AT8922600 |
|       |     |         |     |     | AT8923500 |
|       |     |         |     |     | AT8924400 |
|       |     |         |     |     | AT8925300 |
|       |     |         |     |     | AT8926200 |
|       |     |         |     |     | AT8927100 |
|       |     |         |     |     | AT8928000 |
|       |     |         |     |     | AT8928900 |
|       |     |         |     |     | AT8929800 |
|       |     |         |     |     | AT8930700 |
|       |     |         |     |     | AT8931600 |
|       |     |         |     |     | AT8932500 |
|       |     |         |     |     | AT8933400 |
|       |     |         |     |     | AT8934300 |
|       |     |         |     |     | AT8935200 |
|       |     |         |     |     | AT8936100 |
|       |     |         |     |     | AT8937000 |
|       |     |         |     |     | AT8937900 |
|       |     |         |     |     | AT8938800 |
|       |     |         |     |     | AT8939700 |
|       |     |         |     |     | AT8940600 |
|       |     |         |     |     | AT8941500 |
|       |     |         |     |     | AT8942400 |
|       |     |         |     |     | AT8943300 |
|       |     |         |     |     | AT8944200 |
|       |     |         |     |     | AT8945100 |
|       |     |         |     |     | AT8946000 |
|       |     |         |     |     | AT8946900 |
|       |     |         |     |     | AT8947800 |
|       |     |         |     |     | AT8948700 |
|       |     |         |     |     | AT8949600 |
|       |     |         |     |     | AT8950500 |
|       |     |         |     |     | AT8951400 |
|       |     |         |     |     | AT8952300 |
|       |     |         |     |     | AT8953200 |
|       |     |         |     |     | AT8954100 |
|       |     |         |     |     | AT8955000 |
|       |     |         |     |     | AT8955900 |
|       |     |         |     |     | AT8956800 |
|       |     |         |     |     | AT8957700 |
|       |     |         |     |     | AT8958600 |
|       |     |         |     |     | AT8959500 |
|       |     |         |     |     | AT8960400 |
|       |     |         |     |     | AT8961300 |
|       |     |         |     |     | AT8962200 |
|       |     |         |     |     | AT8963100 |
|       |     |         |     |     | AT8964000 |
|       |     |         |     |     | AT8964900 |
|       |     |         |     |     | AT8965800 |
|       |     |         |     |     | AT8966700 |
|       |     |         |     |     | AT8967600 |
|       |     |         |     |     | AT8968500 |
|       |     |         |     |     | AT8969400 |
|       |     |         |     |     | AT8970300 |
|       |     |         |     |     | AT8971200 |
|       |     |         |     |     | AT8972100 |
|       |     |         |     |     | AT8973000 |
|       |     |         |     |     | AT8973900 |
|       |     |         |     |     | AT8974800 |
|       |     |         |     |     | AT8975700 |
|       |     |         |     |     | AT8976600 |
|       |     |         |     |     | AT8977500 |
|       |     |         |     |     | AT8978400 |
|       |     |         |     |     | AT8979300 |
|       |     |         |     |     | AT8980200 |
|       |     |         |     |     | AT8981100 |
|       |     |         |     |     | AT8982000 |
|       |     |         |     |     | AT8982900 |
|       |     |         |     |     | AT8983800 |
|       |     |         |     |     | AT8984700 |
|       |     |         |     |     | AT8985600 |
|       |     |         |     |     | AT8986500 |
|       |     |         |     |     | AT8987400 |
|       |     |         |     |     | AT8988300 |
|       |     |         |     |     | AT8989200 |
|       |     |         |     |     | AT8990100 |
|       |     |         |     |     | AT8991000 |
|       |     |         |     |     | AT8991900 |
|       |     |         |     |     | AT8992800 |
|       |     |         |     |     | AT8993700 |
|       |     |         |     |     | AT8994600 |
|       |     |         |     |     | AT8995500 |
|       |     |         |     |     | AT8996400 |
|       |     |         |     |     | AT8997300 |
|       |     |         |     |     | AT8998200 |
|       |     |         |     |     | AT8999100 |
|       |     |         |     |     | AT9000000 |
|       |     |         |     |     | AT9000900 |
|       |     |         |     |     | AT9001800 |
|       |     |         |     |     | AT9002700 |
|       |     |         |     |     | AT9003600 |
|       |     |         |     |     | AT9004500 |
|       |     |         |     |     | AT9005400 |
|       |     |         |     |     | AT9006300 |
|       |     |         |     |     | AT9007200 |
|       |     |         |     |     | AT9008100 |
|       |     |         |     |     | AT9009000 |
|       |     |         |     |     | AT9009900 |
|       |     |         |     |     | AT9010800 |
|       |     |         |     |     | AT9011700 |
|       |     |         |     |     | AT9012600 |
|       |     |         |     |     | AT9013500 |
|       |     |         |     |     | AT9014400 |
|       |     |         |     |     | AT9015300 |
|       |     |         |     |     | AT9016200 |
|       |     |         |     |     | AT9017100 |
|       |     |         |     |     | AT9018000 |
|       |     |         |     |     | AT9018900 |
|       |     |         |     |     | AT9019800 |
|       |     |         |     |     | AT9020700 |
|       |     |         |     |     | AT9021600 |
|       |     |         |     |     | AT9022500 |
|       |     |         |     |     | AT9023400 |
|       |     |         |     |     | AT9024300 |
|       |     |         |     |     | AT9025200 |
|       |     |         |     |     | AT9026100 |
|       |     |         |     |     | AT9027000 |
|       |     |         |     |     | AT9027900 |
|       |     |         |     |     | AT9028800 |
|       |     |         |     |     | AT9029700 |
|       |     |         |     |     | AT9030600 |
|       |     |         |     |     | AT9031500 |
|       |     |         |     |     | AT9032400 |
|       |     |         |     |     | AT9033300 |
|       |     |         |     |     | AT9034200 |
|       |     |         |     |     | AT9035100 |
|       |     |         |     |     | AT9036000 |
|       |     |         |     |     | AT9036900 |
|       |     |         |     |     | AT9037800 |
|       |     |         |     |     | AT9038700 |
|       |     |         |     |     | AT9039600 |
|       |     |         |     |     | AT9040500 |
|       |     |         |     |     | AT9041400 |
|       |     |         |     |     | AT9042300 |
|       |     |         |     |     | AT9043200 |
|       |     |         |     |     | AT9044100 |
|       |     |         |     |     | AT9045000 |
|       |     |         |     |     | AT9045900 |
|       |     |         |     |     | AT9046800 |
|       |     |         |     |     | AT9047700 |
|       |     |         |     |     | AT9048600 |
|       |     |         |     |     | AT9049500 |
|       |     |         |     |     | AT9050400 |
|       |     |         |     |     | AT9051300 |
|       |     |         |     |     | AT9052200 |
|       |     |         |     |     | AT9053100 |
|       |     |         |     |     | AT9054000 |
|       |     |         |     |     | AT9054900 |
|       |     |         |     |     | AT9055800 |
|       |     |         |     |     | AT9056700 |
|       |     |         |     |     | AT9057600 |
|       |     |         |     |     | AT9058500 |
|       |     |         |     |     | AT9059400 |
|       |     |         |     |     | AT9060300 |
|       |     |         |     |     | AT9061200 |
|       |     |         |     |     | AT9062100 |
|       |     |         |     |     | AT9063000 |
|       |     |         |     |     | AT9063900 |
|       |     |         |     |     | AT9064800 |
|       |     |         |     |     | AT9065700 |
|       |     |         |     |     | AT9066600 |
|       |     |         |     |     | AT9067500 |
|       |     |         |     |     | AT9068400 |
|       |     |         |     |     | AT9069300 |
|       |     |         |     |     | AT9070200 |
|       |     |         |     |     | AT9071100 |
|       |     |         |     |     | AT9072000 |
|       |     |         |     |     | AT9072900 |
|       |     |         |     |     | AT9073800 |
|       |     |         |     |     | AT9074700 |
|       |     |         |     |     | AT9075600 |
|       |     |         |     |     | AT9076500 |
|       |     |         |     |     | AT9077400 |
|       |     |         |     |     | AT9078300 |
|       |     |         |     |     | AT9079200 |
|       |     |         |     |     | AT9080100 |
|       |     |         |     |     | AT9081000 |
|       |     |         |     |     | AT9081900 |
|       |     |         |     |     | AT9082800 |
|       |     |         |     |     | AT9083700 |
|       |     |         |     |     | AT9084600 |
|       |     |         |     |     | AT9085500 |
|       |     |         |     |     | AT9086400 |
|       |     |         |     |     | AT9087300 |
|       |     |         |     |     | AT9088200 |
|       |     |         |     |     | AT9089100 |
|       |     |         |     |     | AT9090000 |
|       |     |         |     |     | AT9090900 |
|       |     |         |     |     | AT9091800 |
|       |     |         |     |     | AT9092700 |
|       |     |         |     |     | AT9093600 |
|       |     |         |     |     | AT9094500 |
|       |     |         |     |     | AT9095400 |
|       |     |         |     |     | AT9096300 |
|       |     |         |     |     | AT9097200 |
|       |     |         |     |     | AT9098100 |
|       |     |         |     |     | AT9099000 |
|       |     |         |     |     | AT9100000 |
|       |     |         |     |     | AT9100900 |
|       |     |         |     |     | AT9101800 |
|       |     |         |     |     | AT9102700 |
|       |     |         |     |     | AT9103600 |
|       |     |         |     |     | AT9104500 |
|       |     |         |     |     | AT9105400 |
|       |     |         |     |     | AT9106300 |
|       |     |         |     |     | AT9107200 |
|       |     |         |     |     | AT9108100 |
|       |     |         |     |     | AT9109000 |
|       |     |         |     |     | AT9109900 |
|       |     |         |     |     | AT9110800 |
|       |     |         |     |     | AT9111700 |
|       |     |         |     |     | AT9112600 |
|       |     |         |     |     | AT9113500 |
|       |     |         |     |     | AT9114400 |
|       |     |         |     |     | AT9115300 |
|       |     |         |     |     | AT9116200 |
|       |     |         |     |     | AT9117100 |
|       |     |         |     |     | AT9118000 |
|       |     |         |     |     | AT9118900 |
|       |     |         |     |     | AT9119800 |
|       |     |         |     |     | AT9120700 |
|       |     |         |     |     | AT9121600 |
|       |     |         |     |     | AT9122500 |
|       |     |         |     |     | AT9123400 |
|       |     |         |     |     | AT9124300 |
|       |     |         |     |     | AT9125200 |
|       |     |         |     |     | AT9126100 |
|       |     |         |     |     | AT9127000 |
|       |     |         |     |     | AT9127900 |
|       |     |         |     |     | AT9128800 |
|       |     |         |     |     | AT9129700 |
|       |     |         |     |     | AT9130600 |
|       |     |         |     |     | AT9131500 |
|       |     |         |     |     | AT9132400 |
|       |     |         |     |     | AT9133300 |
|       |     |         |     |     | AT9134200 |
|       |     |         |     |     | AT9135100 |
|       |     |         |     |     | AT9136000 |
|       |     |         |     |     | AT9136900 |
|       |     |         |     |     | AT9137800 |
|       |     |         |     |     | AT9138700 |
|       |     |         |     |     | AT9139600 |
|       |     |         |     |     | AT9140500 |
|       |     |         |     |     | AT9141400 |
|       |     |         |     |     | AT9142300 |
|       |     |         |     |     | AT9143200 |
|       |     |         |     |     | AT9144100 |
|       |     |         |     |     | AT9145000 |
|       |     |         |     |     | AT9145900 |
|       |     |         |     |     | AT9146800 |
|       |     |         |     |     | AT9147700 |
|       |     |         |     |     | AT9148600 |
|       |     |         |     |     | AT9149500 |
|       |     |         |     |     | AT9150400 |
|       |     |         |     |     | AT9151300 |
|       |     |         |     |     | AT9152200 |
|       |     |         |     |     | AT9153100 |
|       |     |         |     |     | AT9154000 |
|       |     |         |     |     | AT9154900 |
|       |     |         |     |     | AT9155800 |
|       |     |         |     |     | AT9156700 |
|       |     |         |     |     | AT9157600 |
|       |     |         |     |     | AT9158500 |
|       |     |         |     |     | AT9159400 |
|       |     |         |     |     | AT9160300 |
|       |     |         |     |     | AT9161200 |
|       |     |         |     |     | AT9162100 |
|       |     |         |     |     | AT9163000 |
|       |     |         |     |     | AT9163900 |
|       |     |         |     |     | AT9164800 |
|       |     |         |     |     | AT9165700 |
|       |     |         |     |     | AT9166600 |
|       |     |         |     |     | AT9167500 |
|       |     |         |     |     | AT9168400 |
|       |     |         |     |     | AT9169300 |
|       |     |         |     |     | AT9170200 |
|       |     |         |     |     | AT9171100 |
|       |     |         |     |     | AT9172000 |
|       |     |         |     |     | AT9172900 |
|       |     |         |     |     | AT9173800 |
|       |     |         |     |     | AT9174700 |
|       |     |         |     |     | AT9175600 |
|       |     |         |     |     | AT9176500 |
|       |     |         |     |     | AT9177400 |
|       |     |         |     |     | AT9178300 |
|       |     |         |     |     | AT9179200 |
|       |     |         |     |     | AT9180100 |
|       |     |         |     |     | AT9181000 |
|       |     |         |     |     | AT9181900 |
|       |     |         |     |     | AT9182800 |
|       |     |         |     |     | AT9183700 |
|       |     |         |     |     | AT9184600 |
|       |     |         |     |     | AT9185500 |
|       |     |         |     |     | AT9186400 |
|       |     |         |     |     | AT9187300 |
|       |     |         |     |     | AT9188200 |
|       |     |         |     |     | AT9189100 |
|       |     |         |     |     | AT9190000 |
|       |     |         |     |     | AT9190900 |
|       |     |         |     |     | AT9191800 |
|       |     |         |     |     | AT9192700 |
|       |     |         |     |     | AT9193600 |
|       |     |         |     |     | AT9194500 |
|       |     |         |     |     | AT9195400 |
|       |     |         |     |     | AT9196300 |
|       |     |         |     |     | AT9197200 |
|       |     |         |     |     | AT9198100 |
|       |     |         |     |     | AT9199000 |
|       |     |         |     |     |           |



**Cluster 33**

|           |           |           |           |           |
|-----------|-----------|-----------|-----------|-----------|
| AT1G01910 | AT2G15390 | AT3G01190 | AT4G00040 | AT5G01220 |
| AT1G04810 | AT2G16570 | AT3G01290 | AT4G00100 | AT5G02050 |
| AT1G05620 | AT2G17500 | AT3G02660 | AT4G00290 | AT5G04710 |
| AT1G06890 | AT2G18030 | AT3G03050 | AT4G00710 | AT5G04960 |
| AT1G08450 | AT2G18980 | AT3G04570 | AT4G01660 | AT5G05990 |
| AT1G14060 | AT2G19160 | AT3G05420 | AT4G04470 | AT5G07350 |
| AT1G14210 | AT2G19860 | AT3G06040 | AT4G04860 | AT5G09450 |
| AT1G14710 | AT2G21250 | AT3G07470 | AT4G09990 | AT5G10830 |
| AT1G15710 | AT2G22125 | AT3G07950 | AT4G11600 | AT5G12200 |
| AT1G16300 | AT2G22500 | AT3G08550 | AT4G12130 | AT5G14060 |
| AT1G17160 | AT2G22970 | AT3G09690 | AT4G13050 | AT5G14580 |
| AT1G17890 | AT2G24170 | AT3G09740 | AT4G13200 | AT5G16290 |
| AT1G19130 | AT2G25830 | AT3G10050 | AT4G16180 | AT5G16390 |
| AT1G19140 | AT2G27190 | AT3G10260 | AT4G16210 | AT5G16660 |
| AT1G20230 | AT2G30920 | AT3G11170 | AT4G16500 | AT5G16930 |
| AT1G20560 | AT2G34560 | AT3G11730 | AT4G17040 | AT5G18900 |
| AT1G21370 | AT2G34585 | AT3G12290 | AT4G17420 | AT5G19370 |
| AT1G21560 | AT2G35790 | AT3G12370 | AT4G18230 | AT5G20350 |
| AT1G23170 | AT2G35810 | AT3G13460 | AT4G20020 | AT5G20490 |
| AT1G25380 | AT2G37550 | AT3G15290 | AT4G20460 | AT5G20980 |
| AT1G26160 | AT2G37670 | AT3G15660 | AT4G21180 | AT5G22330 |
| AT1G29250 | AT2G38650 | AT3G16200 | AT4G21540 | AT5G22350 |
| AT1G30450 | AT2G40800 | AT3G17910 | AT4G21570 | AT5G22740 |
| AT1G30870 | AT2G41600 | AT3G18760 | AT4G22214 | AT5G23740 |
| AT1G31860 | AT2G43070 | AT3G19508 | AT4G23640 | AT5G25940 |
| AT1G48230 | AT2G44040 | AT3G21400 | AT4G25570 | AT5G27395 |
| AT1G48610 | AT2G45070 | AT3G21465 | AT4G26010 | AT5G27430 |
| AT1G48900 | AT2G45990 | AT3G21540 | AT4G27640 | AT5G28220 |
| AT1G49140 | AT2G47540 | AT3G23190 | AT4G27720 | AT5G38460 |
| AT1G50140 |           | AT3G23510 | AT4G28050 | AT5G40580 |
| AT1G50500 |           | AT3G23600 | AT4G29430 | AT5G43430 |
| AT1G53645 |           | AT3G24503 | AT4G31460 | AT5G43830 |
| AT1G56550 |           | AT3G27020 | AT4G32880 | AT5G44710 |
| AT1G62730 |           | AT3G27230 | AT4G34140 | AT5G44820 |
| AT1G62810 |           | AT3G27300 | AT4G34180 | AT5G46160 |
| AT1G63110 |           | AT3G27430 | AT4G35860 | AT5G47040 |
| AT1G63450 |           | AT3G27890 |           | AT5G47420 |
| AT1G65540 |           | AT3G28480 |           | AT5G47780 |
| AT1G66580 |           | AT3G29250 |           | AT5G48180 |
| AT1G67930 |           | AT3G29360 |           | AT5G49270 |
| AT1G70410 |           | AT3G46560 |           | AT5G49680 |
| AT1G70730 |           | AT3G48110 |           | AT5G52210 |
| AT1G72280 |           | AT3G48890 |           | AT5G53340 |
| AT1G72480 |           | AT3G51440 |           | AT5G54500 |
| AT1G73160 |           | AT3G51830 |           | AT5G55200 |
| AT1G74910 |           | AT3G51980 |           | AT5G56350 |
| AT1G74920 |           | AT3G52190 |           | AT5G56730 |
| AT1G75940 |           | AT3G52570 |           | AT5G58270 |
| AT1G76690 |           | AT3G52640 |           | AT5G58784 |
| AT1G77710 |           | AT3G53180 |           | AT5G59910 |
| AT1G78660 |           | AT3G53900 |           | AT5G60730 |
| AT1G80670 |           | AT3G53990 |           | AT5G61580 |
|           |           | AT3G54840 |           | AT5G62270 |

Cluster 33  
(con.)

AT3G55920  
 AT3G56900  
 AT3G56950  
 AT3G57560  
 AT3G57630  
 AT3G57660  
 AT3G58140  
 AT3G58840  
 AT3G60440  
 AT3G60850  
 AT3G61520  
 AT3G63190

AT5G64670  
 AT5G66060  
 ATMG00560

| Cluster 33<br>GO identifier | Description                                                                                                                                                                                       | #<br>Associated<br>to the GO<br>in Cluster | Total # in<br>Cluster | p-value     |
|-----------------------------|---------------------------------------------------------------------------------------------------------------------------------------------------------------------------------------------------|--------------------------------------------|-----------------------|-------------|
| GO:0005739                  | mitochondrion                                                                                                                                                                                     | 23                                         | 237                   | 1.64E-05    |
| GO:0009932                  | cell tip growth                                                                                                                                                                                   | 3                                          | 237                   | 1.14E-04    |
| GO:0018401                  | peptidyl-proline hydroxylation to 4-hydroxy-L-proline                                                                                                                                             | 3                                          | 237                   | 1.61E-04    |
| GO:0006412                  | translation                                                                                                                                                                                       | 11                                         | 237                   | 4.49E-04    |
| GO:0005794                  | Golgi apparatus                                                                                                                                                                                   | 7                                          | 237                   | 5.51E-04    |
| GO:0005783                  | endoplasmic reticulum                                                                                                                                                                             | 10                                         | 237                   | 7.09E-04    |
| GO:0003735                  | structural constituent of ribosome                                                                                                                                                                | 10                                         | 237                   | 0.001161272 |
| GO:0006744                  | ubiquinone biosynthetic process                                                                                                                                                                   | 2                                          | 237                   | 0.001843583 |
| GO:0016036                  | cellular response to phosphate starvation                                                                                                                                                         | 3                                          | 237                   | 0.002600203 |
| GO:0005759                  | mitochondrial matrix                                                                                                                                                                              | 3                                          | 237                   | 0.003948399 |
| GO:0016757                  | transferase activity, transferring glycosyl groups                                                                                                                                                | 9                                          | 237                   | 0.004904106 |
| GO:0004601                  | peroxidase activity                                                                                                                                                                               | 4                                          | 237                   | 0.005834007 |
| GO:0009699                  | phenylpropanoid biosynthetic process                                                                                                                                                              | 2                                          | 237                   | 0.006387293 |
| GO:0005773                  | vacuole                                                                                                                                                                                           | 11                                         | 237                   | 0.007903408 |
| GO:0004028                  | 3-chloroallyl aldehyde dehydrogenase activity                                                                                                                                                     | 2                                          | 237                   | 0.010214625 |
| GO:0016706                  | oxidoreductase activity, acting on paired donors, with incorporation or reduction of molecular oxygen, 2-oxoglutarate as one donor, and incorporation of one atom each of oxygen into both donors | 3                                          | 237                   | 0.01070978  |
| GO:0000035                  | acyl binding                                                                                                                                                                                      | 1                                          | 237                   | 0.011364181 |
| GO:0003871                  | 5-methyltetrahydropteroyltriglutamate-homocysteine S-methyltransferase activity                                                                                                                   | 1                                          | 237                   | 0.011364181 |
| GO:0003991                  | acetylglutamate kinase activity                                                                                                                                                                   | 1                                          | 237                   | 0.011364181 |
| GO:0004157                  | dihydropyrimidinase activity                                                                                                                                                                      | 1                                          | 237                   | 0.011364181 |
| GO:0004395                  | hexaprenyldihydroxybenzoate methyltransferase activity                                                                                                                                            | 1                                          | 237                   | 0.011364181 |
| GO:0004635                  | phosphoribosyl-AMP cyclohydrolase activity                                                                                                                                                        | 1                                          | 237                   | 0.011364181 |
| GO:0004636                  | phosphoribosyl-ATP diphosphatase activity                                                                                                                                                         | 1                                          | 237                   | 0.011364181 |
| GO:0004794                  | L-threonine ammonia-lyase activity                                                                                                                                                                | 1                                          | 237                   | 0.011364181 |
| GO:0006566                  | threonine metabolic process                                                                                                                                                                       | 1                                          | 237                   | 0.011364181 |
| GO:0008535                  | respiratory chain complex IV assembly                                                                                                                                                             | 1                                          | 237                   | 0.011364181 |
| GO:0008691                  | 3-hydroxybutyryl-CoA dehydrogenase activity                                                                                                                                                       | 1                                          | 237                   | 0.011364181 |
| GO:0008705                  | methionine synthase activity                                                                                                                                                                      | 1                                          | 237                   | 0.011364181 |
| GO:0008752                  | FMN reductase activity                                                                                                                                                                            | 1                                          | 237                   | 0.011364181 |
| GO:0009399                  | nitrogen fixation                                                                                                                                                                                 | 1                                          | 237                   | 0.011364181 |
| GO:0010009                  | external side of endosome membrane                                                                                                                                                                | 1                                          | 237                   | 0.011364181 |
| GO:0010420                  | polyprenyldihydroxybenzoate methyltransferase activity                                                                                                                                            | 1                                          | 237                   | 0.011364181 |
| GO:0016417                  | S-acyltransferase activity                                                                                                                                                                        | 1                                          | 237                   | 0.011364181 |
| GO:0040014                  | regulation of multicellular organism growth                                                                                                                                                       | 1                                          | 237                   | 0.011364181 |

| Cluster 33<br>GO identifier<br>(con.) | Description                                                                               | #<br>Associated<br>to the GO<br>in Cluster | Total # in<br>Cluster | p-value     |
|---------------------------------------|-------------------------------------------------------------------------------------------|--------------------------------------------|-----------------------|-------------|
| GO:0042350                            | GDP-L-fucose biosynthetic process                                                         | 1                                          | 237                   | 0.011364181 |
| GO:0045022                            | early endosome to late endosome transport                                                 | 1                                          | 237                   | 0.011364181 |
| GO:0046510                            | UDP-sulfoquinovose:DAG sulfoquinovosyltransferase activity                                | 1                                          | 237                   | 0.011364181 |
| GO:0050269                            | coniferyl-aldehyde dehydrogenase activity                                                 | 1                                          | 237                   | 0.011364181 |
| GO:0009536                            | plastid                                                                                   | 5                                          | 237                   | 0.012791724 |
| GO:0005840                            | ribosome                                                                                  | 6                                          | 237                   | 0.013698279 |
| GO:0006820                            | anion transport                                                                           | 2                                          | 237                   | 0.014755184 |
| GO:0005886                            | plasma membrane                                                                           | 27                                         | 237                   | 0.015383636 |
| GO:0005839                            | proteasome core complex                                                                   | 2                                          | 237                   | 0.019924246 |
| GO:0004665                            | prephenate dehydrogenase (NADP+) activity                                                 | 1                                          | 237                   | 0.022471151 |
| GO:0004820                            | glycine-tRNA ligase activity                                                              | 1                                          | 237                   | 0.022471151 |
| GO:0006402                            | mRNA catabolic process                                                                    | 1                                          | 237                   | 0.022471151 |
| GO:0006426                            | glycyl-tRNA aminoacylation                                                                | 1                                          | 237                   | 0.022471151 |
| GO:0006571                            | tyrosine biosynthetic process                                                             | 1                                          | 237                   | 0.022471151 |
| GO:0009097                            | isoleucine biosynthetic process                                                           | 1                                          | 237                   | 0.022471151 |
| GO:0009374                            | biotin binding                                                                            | 1                                          | 237                   | 0.022471151 |
| GO:0009747                            | hexokinase-dependent signaling                                                            | 1                                          | 237                   | 0.022471151 |
| GO:0016655                            | oxidoreductase activity, acting on NADH or NADPH, quinone or similar compound as acceptor | 1                                          | 237                   | 0.022471151 |
| GO:0019285                            | glycine betaine biosynthetic process from choline                                         | 1                                          | 237                   | 0.022471151 |
| GO:0045597                            | positive regulation of cell differentiation                                               | 1                                          | 237                   | 0.022471151 |
| GO:0046506                            | sulfolipid biosynthetic process                                                           | 1                                          | 237                   | 0.022471151 |
| GO:0046900                            | tetrahydrofolylpolyglutamate metabolic process                                            | 1                                          | 237                   | 0.022471151 |
| GO:0047262                            | polygalacturonate 4-alpha-galacturonosyltransferase activity                              | 2                                          | 237                   | 0.02765864  |
| GO:0007264                            | small GTPase mediated signal transduction                                                 | 3                                          | 237                   | 0.028138876 |
| GO:0009507                            | chloroplast                                                                               | 33                                         | 237                   | 0.032838734 |
| GO:0003984                            | acetolactate synthase activity                                                            | 1                                          | 237                   | 0.033325256 |
| GO:0004044                            | amidophosphoribosyltransferase activity                                                   | 1                                          | 237                   | 0.033325256 |
| GO:0004047                            | aminomethyltransferase activity                                                           | 1                                          | 237                   | 0.033325256 |
| GO:0004614                            | phosphoglucomutase activity                                                               | 1                                          | 237                   | 0.033325256 |
| GO:0004826                            | phenylalanine-tRNA ligase activity                                                        | 1                                          | 237                   | 0.033325256 |
| GO:0005769                            | early endosome                                                                            | 1                                          | 237                   | 0.033325256 |
| GO:0006432                            | phenylalanyl-tRNA aminoacylation                                                          | 1                                          | 237                   | 0.033325256 |
| GO:0006465                            | signal peptide processing                                                                 | 1                                          | 237                   | 0.033325256 |
| GO:0006612                            | protein targeting to membrane                                                             | 1                                          | 237                   | 0.033325256 |
| GO:0008805                            | carbon-monoxide oxygenase activity                                                        | 1                                          | 237                   | 0.033325256 |
| GO:0015074                            | DNA integration                                                                           | 1                                          | 237                   | 0.033325256 |
| GO:0016747                            | transferase activity, transferring acyl groups other than amino-acyl groups               | 1                                          | 237                   | 0.033325256 |
| GO:0016853                            | isomerase activity                                                                        | 1                                          | 237                   | 0.033325256 |
| GO:0030742                            | GTP-dependent protein binding                                                             | 1                                          | 237                   | 0.033325256 |
| GO:0042450                            | arginine biosynthetic process via ornithine                                               | 1                                          | 237                   | 0.033325256 |
| GO:0045995                            | regulation of embryonic development                                                       | 1                                          | 237                   | 0.033325256 |
| GO:0051753                            | mannan synthase activity                                                                  | 1                                          | 237                   | 0.033325256 |
| GO:0005525                            | GTP binding                                                                               | 5                                          | 237                   | 0.034747981 |
| GO:0003824                            | catalytic activity                                                                        | 8                                          | 237                   | 0.035335458 |
| GO:0008565                            | protein transporter activity                                                              | 3                                          | 237                   | 0.038405585 |
| GO:0005743                            | mitochondrial inner membrane                                                              | 3                                          | 237                   | 0.043364475 |
| GO:0003979                            | UDP-glucose 6-dehydrogenase activity                                                      | 1                                          | 237                   | 0.043930781 |
| GO:0005746                            | mitochondrial respiratory chain                                                           | 1                                          | 237                   | 0.043930781 |
| GO:0006552                            | leucine catabolic process                                                                 | 1                                          | 237                   | 0.043930781 |

| Cluster 33<br>GO identifier<br>(con.) | Description                                                                              | #<br>Associated<br>to the GO<br>in Cluster | Total # in<br>Cluster | p-value     |
|---------------------------------------|------------------------------------------------------------------------------------------|--------------------------------------------|-----------------------|-------------|
| GO:0006617                            | SRP-dependent cotranslational protein targeting to membrane, signal sequence recognition | 1                                          | 237                   | 0.043930781 |
| GO:0009247                            | glycolipid biosynthetic process                                                          | 1                                          | 237                   | 0.043930781 |
| GO:0010288                            | response to lead ion                                                                     | 1                                          | 237                   | 0.043930781 |
| GO:0022627                            | cytosolic small ribosomal subunit                                                        | 3                                          | 237                   | 0.049858161 |
| GO:0015031                            | protein transport                                                                        | 3                                          | 237                   | 0.053894255 |
| GO:0000062                            | acyl-CoA binding                                                                         | 1                                          | 237                   | 0.054291944 |
| GO:0003989                            | acetyl-CoA carboxylase activity                                                          | 1                                          | 237                   | 0.054291944 |
| GO:0004340                            | glucokinase activity                                                                     | 1                                          | 237                   | 0.054291944 |
| GO:0004396                            | hexokinase activity                                                                      | 1                                          | 237                   | 0.054291944 |
| GO:0006467                            | protein thiol-disulfide exchange                                                         | 1                                          | 237                   | 0.054291944 |
| GO:0006890                            | retrograde vesicle-mediated transport, Golgi to ER                                       | 1                                          | 237                   | 0.054291944 |
| GO:0008312                            | 7S RNA binding                                                                           | 1                                          | 237                   | 0.054291944 |
| GO:0008865                            | fructokinase activity                                                                    | 1                                          | 237                   | 0.054291944 |
| GO:0009082                            | branched chain family amino acid biosynthetic process                                    | 1                                          | 237                   | 0.054291944 |
| GO:0009113                            | purine base biosynthetic process                                                         | 1                                          | 237                   | 0.054291944 |
| GO:0009396                            | folic acid and derivative biosynthetic process                                           | 1                                          | 237                   | 0.054291944 |
| GO:0016485                            | protein processing                                                                       | 1                                          | 237                   | 0.054291944 |
| GO:0017004                            | cytochrome complex assembly                                                              | 1                                          | 237                   | 0.054291944 |
| GO:0019303                            | D-ribose catabolic process                                                               | 1                                          | 237                   | 0.054291944 |
| GO:0019762                            | glucosinolate catabolic process                                                          | 1                                          | 237                   | 0.054291944 |
| GO:0030234                            | enzyme regulator activity                                                                | 1                                          | 237                   | 0.054291944 |
| GO:0004029                            | aldehyde dehydrogenase (NAD) activity                                                    | 1                                          | 237                   | 0.064412899 |
| GO:0004345                            | glucose-6-phosphate dehydrogenase activity                                               | 1                                          | 237                   | 0.064412899 |
| GO:0004845                            | uracil phosphoribosyltransferase activity                                                | 1                                          | 237                   | 0.064412899 |
| GO:0006006                            | glucose metabolic process                                                                | 1                                          | 237                   | 0.064412899 |
| GO:0006546                            | glycine catabolic process                                                                | 1                                          | 237                   | 0.064412899 |
| GO:0009086                            | methionine biosynthetic process                                                          | 1                                          | 237                   | 0.064412899 |
| GO:0009116                            | nucleoside metabolic process                                                             | 1                                          | 237                   | 0.064412899 |
| GO:0015976                            | carbon utilization                                                                       | 1                                          | 237                   | 0.064412899 |
| GO:0030176                            | integral to endoplasmic reticulum membrane                                               | 1                                          | 237                   | 0.064412899 |
| GO:0046914                            | transition metal ion binding                                                             | 1                                          | 237                   | 0.064412899 |
| GO:0009651                            | response to salt stress                                                                  | 6                                          | 237                   | 0.064932138 |
| GO:0006839                            | mitochondrial transport                                                                  | 2                                          | 237                   | 0.070339331 |
| GO:0006096                            | glycolysis                                                                               | 2                                          | 237                   | 0.072937573 |
| GO:0015450                            | P-P-bond-hydrolysis-driven protein transmembrane transporter activity                    | 2                                          | 237                   | 0.072937573 |
| GO:0000105                            | histidine biosynthetic process                                                           | 1                                          | 237                   | 0.074297741 |
| GO:0000911                            | cytokinesis by cell plate formation                                                      | 1                                          | 237                   | 0.074297741 |
| GO:0003872                            | 6-phosphofructokinase activity                                                           | 1                                          | 237                   | 0.074297741 |
| GO:0004356                            | glutamate-ammonia ligase activity                                                        | 1                                          | 237                   | 0.074297741 |
| GO:0005945                            | 6-phosphofructokinase complex                                                            | 1                                          | 237                   | 0.074297741 |
| GO:0015996                            | chlorophyll catabolic process                                                            | 1                                          | 237                   | 0.074297741 |
| GO:0016208                            | AMP binding                                                                              | 1                                          | 237                   | 0.074297741 |
| GO:0019408                            | dolichol biosynthetic process                                                            | 1                                          | 237                   | 0.074297741 |
| GO:0045547                            | dehydrodolichyl diphosphate synthase activity                                            | 1                                          | 237                   | 0.074297741 |
| GO:0008233                            | peptidase activity                                                                       | 2                                          | 237                   | 0.080799359 |
| GO:0006633                            | fatty acid biosynthetic process                                                          | 2                                          | 237                   | 0.083437404 |
| GO:0016051                            | carbohydrate biosynthetic process                                                        | 2                                          | 237                   | 0.083437404 |
| GO:0000175                            | 3'-5'-exoribonuclease activity                                                           | 1                                          | 237                   | 0.083950501 |
| GO:0004439                            | phosphatidylinositol-4,5-bisphosphate 5-phosphatase activity                             | 1                                          | 237                   | 0.083950501 |
| GO:0005758                            | mitochondrial intermembrane space                                                        | 1                                          | 237                   | 0.083950501 |

| Cluster 33<br>GO identifier<br>(con.) | Description                                                                         | #<br>Associated<br>to the GO<br>in Cluster | Total # in<br>Cluster | p-value     |
|---------------------------------------|-------------------------------------------------------------------------------------|--------------------------------------------|-----------------------|-------------|
| GO:0005788                            | endoplasmic reticulum lumen                                                         | 1                                          | 237                   | 0.083950501 |
| GO:0006506                            | GPI anchor biosynthetic process                                                     | 1                                          | 237                   | 0.083950501 |
| GO:0006526                            | arginine biosynthetic process                                                       | 1                                          | 237                   | 0.083950501 |
| GO:0006817                            | phosphate transport                                                                 | 1                                          | 237                   | 0.083950501 |
| GO:0008284                            | positive regulation of cell proliferation                                           | 1                                          | 237                   | 0.083950501 |
| GO:0008540                            | proteasome regulatory particle, base subcomplex                                     | 1                                          | 237                   | 0.083950501 |
| GO:0009051                            | pentose-phosphate shunt, oxidative branch                                           | 1                                          | 237                   | 0.083950501 |
| GO:0010014                            | meristem initiation                                                                 | 1                                          | 237                   | 0.083950501 |
| GO:0016020                            | membrane                                                                            | 17                                         | 237                   | 0.089648457 |
| GO:0016021                            | integral to membrane                                                                | 5                                          | 237                   | 0.090923376 |
| GO:0000036                            | acyl carrier activity                                                               | 1                                          | 237                   | 0.09337515  |
| GO:0003729                            | mRNA binding                                                                        | 1                                          | 237                   | 0.09337515  |
| GO:0004602                            | glutathione peroxidase activity                                                     | 1                                          | 237                   | 0.09337515  |
| GO:0005786                            | signal recognition particle, endoplasmic reticulum targeting                        | 1                                          | 237                   | 0.09337515  |
| GO:0005777                            | peroxisome                                                                          | 3                                          | 237                   | 0.094722455 |
| GO:0016887                            | ATPase activity                                                                     | 3                                          | 237                   | 0.099250077 |
| GO:0005834                            | heterotrimeric G-protein complex                                                    | 2                                          | 237                   | 0.099353793 |
| GO:0006499                            | N-terminal protein myristoylation                                                   | 6                                          | 237                   | 0.101844207 |
| GO:0004521                            | endoribonuclease activity                                                           | 1                                          | 237                   | 0.102575599 |
| GO:0004743                            | pyruvate kinase activity                                                            | 1                                          | 237                   | 0.102575599 |
| GO:0006014                            | D-ribose metabolic process                                                          | 1                                          | 237                   | 0.102575599 |
| GO:0008417                            | fucosyltransferase activity                                                         | 1                                          | 237                   | 0.102575599 |
| GO:0010053                            | root epidermal cell differentiation                                                 | 1                                          | 237                   | 0.102575599 |
| GO:0012501                            | programmed cell death                                                               | 1                                          | 237                   | 0.102575599 |
| GO:0048765                            | root hair cell differentiation                                                      | 1                                          | 237                   | 0.102575599 |
| GO:0055114                            | oxidation reduction                                                                 | 1                                          | 237                   | 0.102575599 |
| GO:0005524                            | ATP binding                                                                         | 9                                          | 237                   | 0.105971309 |
| GO:0009570                            | chloroplast stroma                                                                  | 6                                          | 237                   | 0.106148019 |
| GO:0006979                            | response to oxidative stress                                                        | 4                                          | 237                   | 0.106880394 |
| GO:0008113                            | peptide-methionine-(S)-S-oxide reductase activity                                   | 1                                          | 237                   | 0.111555701 |
| GO:0010089                            | xylem histogenesis                                                                  | 1                                          | 237                   | 0.111555701 |
| GO:0019538                            | protein metabolic process                                                           | 1                                          | 237                   | 0.111555701 |
| GO:0032312                            | regulation of ARF GTPase activity                                                   | 1                                          | 237                   | 0.111555701 |
| GO:0048507                            | meristem development                                                                | 1                                          | 237                   | 0.111555701 |
| GO:0006457                            | protein folding                                                                     | 4                                          | 237                   | 0.119098349 |
| GO:0009672                            | auxin:hydrogen symporter activity                                                   | 1                                          | 237                   | 0.120319248 |
| GO:0009821                            | alkaloid biosynthetic process                                                       | 1                                          | 237                   | 0.120319248 |
| GO:0010072                            | primary shoot apical meristem specification                                         | 1                                          | 237                   | 0.120319248 |
| GO:0010181                            | FMN binding                                                                         | 1                                          | 237                   | 0.120319248 |
| GO:0016671                            | oxidoreductase activity, acting on sulfur group of donors,<br>disulfide as acceptor | 1                                          | 237                   | 0.120319248 |
| GO:0042546                            | cell wall biogenesis                                                                | 1                                          | 237                   | 0.120319248 |
| GO:0000059                            | protein import into nucleus, docking                                                | 1                                          | 237                   | 0.128869979 |
| GO:0006631                            | fatty acid metabolic process                                                        | 1                                          | 237                   | 0.128869979 |
| GO:0005618                            | cell wall                                                                           | 5                                          | 237                   | 0.130158966 |
| GO:0005740                            | mitochondrial envelope                                                              | 1                                          | 237                   | 0.137211574 |
| GO:0016844                            | strictosidine synthase activity                                                     | 1                                          | 237                   | 0.137211574 |
| GO:0005215                            | transporter activity                                                                | 4                                          | 237                   | 0.138333341 |
| GO:0005737                            | cytoplasm                                                                           | 6                                          | 237                   | 0.142586898 |
| GO:0004089                            | carbonate dehydratase activity                                                      | 1                                          | 237                   | 0.145347657 |
| GO:0016779                            | nucleotidyltransferase activity                                                     | 1                                          | 237                   | 0.145347657 |
| GO:0008152                            | metabolic process                                                                   | 7                                          | 237                   | 0.147053862 |
| GO:0016787                            | hydrolase activity                                                                  | 3                                          | 237                   | 0.14986076  |

| Cluster 33<br>GO identifier<br>(con.) | Description                                                           | #<br>Associated<br>to the GO<br>in Cluster | Total # in<br>Cluster | p-value     |
|---------------------------------------|-----------------------------------------------------------------------|--------------------------------------------|-----------------------|-------------|
| GO:0005730                            | nucleolus                                                             | 4                                          | 237                   | 0.150610182 |
| GO:0006626                            | protein targeting to mitochondrion                                    | 1                                          | 237                   | 0.153281798 |
| GO:0009532                            | plastid stroma                                                        | 1                                          | 237                   | 0.153281798 |
| GO:0015198                            | oligopeptide transporter activity                                     | 1                                          | 237                   | 0.153281798 |
| GO:0016597                            | amino acid binding                                                    | 1                                          | 237                   | 0.153281798 |
| GO:0009055                            | electron carrier activity                                             | 2                                          | 237                   | 0.153388453 |
| GO:0000271                            | polysaccharide biosynthetic process                                   | 1                                          | 237                   | 0.161017512 |
| GO:0005778                            | peroxisomal membrane                                                  | 1                                          | 237                   | 0.161017512 |
| GO:0010090                            | trichome morphogenesis                                                | 1                                          | 237                   | 0.161017512 |
| GO:0020037                            | heme binding                                                          | 1                                          | 237                   | 0.161017512 |
| GO:0009826                            | unidimensional cell growth                                            | 2                                          | 237                   | 0.165295715 |
| GO:0009941                            | chloroplast envelope                                                  | 5                                          | 237                   | 0.165965595 |
| GO:0006888                            | ER to Golgi vesicle-mediated transport                                | 1                                          | 237                   | 0.168558262 |
| GO:0009225                            | nucleotide-sugar metabolic process                                    | 1                                          | 237                   | 0.168558262 |
| GO:0009749                            | response to glucose stimulus                                          | 1                                          | 237                   | 0.168558262 |
| GO:0009058                            | biosynthetic process                                                  | 2                                          | 237                   | 0.174449206 |
| GO:0005829                            | cytosol                                                               | 3                                          | 237                   | 0.177954447 |
| GO:0046686                            | response to cadmium ion                                               | 4                                          | 237                   | 0.178519245 |
| GO:0009793                            | embryonic development ending in seed dormancy                         | 4                                          | 237                   | 0.179065055 |
| GO:0005744                            | mitochondrial inner membrane presequence translocase complex          | 1                                          | 237                   | 0.183068455 |
| GO:0008514                            | organic anion transmembrane transporter activity                      | 1                                          | 237                   | 0.183068455 |
| GO:0009742                            | brassinosteroid mediated signaling                                    | 1                                          | 237                   | 0.190044563 |
| GO:0009831                            | plant-type cell wall modification during multidimensional cell growth | 1                                          | 237                   | 0.190044563 |
| GO:0010182                            | sugar mediated signaling                                              | 1                                          | 237                   | 0.190044563 |
| GO:0015079                            | potassium ion transmembrane transporter activity                      | 1                                          | 237                   | 0.190044563 |
| GO:0030244                            | cellulose biosynthetic process                                        | 1                                          | 237                   | 0.190044563 |
| GO:0006810                            | transport                                                             | 4                                          | 237                   | 0.194495808 |
| GO:0006511                            | ubiquitin-dependent protein catabolic process                         | 3                                          | 237                   | 0.195760746 |
| GO:0009817                            | defense response to fungus, incompatible interaction                  | 1                                          | 237                   | 0.196839036 |
| GO:0030163                            | protein catabolic process                                             | 1                                          | 237                   | 0.196839036 |
| GO:0006508                            | proteolysis                                                           | 4                                          | 237                   | 0.197454873 |
| GO:0004812                            | aminoacyl-tRNA ligase activity                                        | 1                                          | 237                   | 0.20345508  |
| GO:0005643                            | nuclear pore                                                          | 1                                          | 237                   | 0.20345508  |
| GO:0009832                            | plant-type cell wall biogenesis                                       | 1                                          | 237                   | 0.209895854 |
| GO:0000166                            | nucleotide binding                                                    | 3                                          | 237                   | 0.215352177 |
| GO:0006418                            | tRNA aminoacylation for protein translation                           | 1                                          | 237                   | 0.216164466 |
| GO:0005507                            | copper ion binding                                                    | 2                                          | 237                   | 0.219564182 |
| GO:0006364                            | rRNA processing                                                       | 1                                          | 237                   | 0.222263978 |
| GO:0009505                            | plant-type cell wall                                                  | 3                                          | 237                   | 0.22331609  |
| GO:0009535                            | chloroplast thylakoid membrane                                        | 3                                          | 237                   | 0.225518357 |
| GO:0050660                            | FAD binding                                                           | 1                                          | 237                   | 0.228197404 |
| GO:0006886                            | intracellular protein transport                                       | 2                                          | 237                   | 0.234824373 |
| GO:0006486                            | protein amino acid glycosylation                                      | 1                                          | 237                   | 0.250328926 |
| GO:0008236                            | serine-type peptidase activity                                        | 1                                          | 237                   | 0.25547554  |
| GO:0042742                            | defense response to bacterium                                         | 2                                          | 237                   | 0.25551777  |
| GO:0003924                            | GTPase activity                                                       | 1                                          | 237                   | 0.265324623 |
| GO:0010583                            | response to cyclopentenone                                            | 1                                          | 237                   | 0.265324623 |
| GO:0015934                            | large ribosomal subunit                                               | 1                                          | 237                   | 0.265324623 |
| GO:0016759                            | cellulose synthase activity                                           | 1                                          | 237                   | 0.270032459 |
| GO:0005509                            | calcium ion binding                                                   | 2                                          | 237                   | 0.271088735 |
| GO:0022626                            | cytosolic ribosome                                                    | 2                                          | 237                   | 0.27270635  |

| Cluster 33<br>GO identifier<br>(con.) | Description                                                      | #<br>Associated<br>to the GO<br>in Cluster | Total # in<br>Cluster | p-value     |
|---------------------------------------|------------------------------------------------------------------|--------------------------------------------|-----------------------|-------------|
| GO:0009579                            | thylakoid                                                        | 2                                          | 237                   | 0.273099639 |
| GO:0003993                            | acid phosphatase activity                                        | 1                                          | 237                   | 0.274599331 |
| GO:0009926                            | auxin polar transport                                            | 1                                          | 237                   | 0.274599331 |
| GO:0009965                            | leaf morphogenesis                                               | 1                                          | 237                   | 0.279027821 |
| GO:0006813                            | potassium ion transport                                          | 1                                          | 237                   | 0.299182047 |
| GO:0003899                            | DNA-directed RNA polymerase activity                             | 1                                          | 237                   | 0.30977057  |
| GO:0007568                            | aging                                                            | 1                                          | 237                   | 0.30977057  |
| GO:0008168                            | methyltransferase activity                                       | 1                                          | 237                   | 0.313063278 |
| GO:0045454                            | cell redox homeostasis                                           | 1                                          | 237                   | 0.313063278 |
| GO:0006464                            | protein modification process                                     | 1                                          | 237                   | 0.316241288 |
| GO:0006350                            | transcription                                                    | 1                                          | 237                   | 0.31930677  |
| GO:0010287                            | plastoglobule                                                    | 1                                          | 237                   | 0.31930677  |
| GO:0006334                            | nucleosome assembly                                              | 1                                          | 237                   | 0.325108652 |
| GO:0003755                            | peptidyl-prolyl cis-trans isomerase activity                     | 1                                          | 237                   | 0.335453771 |
| GO:0006970                            | response to osmotic stress                                       | 1                                          | 237                   | 0.342173644 |
| GO:0006396                            | RNA processing                                                   | 1                                          | 237                   | 0.344225844 |
| GO:0016758                            | transferase activity, transferring hexosyl groups                | 1                                          | 237                   | 0.344225844 |
| GO:0006857                            | oligopeptide transport                                           | 1                                          | 237                   | 0.346187221 |
| GO:0008415                            | acyltransferase activity                                         | 1                                          | 237                   | 0.346187221 |
| GO:0042545                            | cell wall modification                                           | 1                                          | 237                   | 0.348059565 |
| GO:0030599                            | pectinesterase activity                                          | 1                                          | 237                   | 0.36003856  |
| GO:0009543                            | chloroplast thylakoid lumen                                      | 1                                          | 237                   | 0.361185525 |
| GO:0004871                            | signal transducer activity                                       | 1                                          | 237                   | 0.367868395 |
| GO:0030246                            | carbohydrate binding                                             | 1                                          | 237                   | 0.367868395 |
| GO:0046872                            | metal ion binding                                                | 1                                          | 237                   | 0.368898228 |
| GO:0006869                            | lipid transport                                                  | 1                                          | 237                   | 0.37026285  |
| GO:0006950                            | response to stress                                               | 1                                          | 237                   | 0.37061741  |
| GO:0042626                            | ATPase activity, coupled to transmembrane movement of substances | 1                                          | 237                   | 0.370766105 |

### Cluster 33

| <u>GO Identifier</u> | <u>#Loci</u> | <u>Associated Loci (Left to Right)</u> |           |           |           |           |           |
|----------------------|--------------|----------------------------------------|-----------|-----------|-----------|-----------|-----------|
| GO:0000035           | 1            | AT5G20350                              |           |           |           |           |           |
| GO:0000036           | 1            | AT4G13050                              |           |           |           |           |           |
| GO:0000059           | 1            | AT4G27640                              |           |           |           |           |           |
| GO:0000062           | 1            | AT3G05420                              |           |           |           |           |           |
| GO:0000105           | 1            | AT1G31860                              |           |           |           |           |           |
| GO:0000166           | 3            | AT1G80670                              | AT3G21540 | AT3G52190 |           |           |           |
| GO:0000175           | 1            | AT5G14580                              |           |           |           |           |           |
| GO:0000271           | 1            | AT3G03050                              |           |           |           |           |           |
| GO:0000911           | 1            | AT4G00100                              |           |           |           |           |           |
| GO:0003729           | 1            | AT1G48900                              |           |           |           |           |           |
| GO:0003735           | 10           | AT1G66580                              | AT3G06040 | AT3G12370 | AT3G18760 | AT4G00100 | AT4G29430 |
|                      |              | AT4G31460                              | AT5G23740 | AT5G46160 | AT5G64670 |           |           |
| GO:0003755           | 1            | AT3G55920                              |           |           |           |           |           |
| GO:0003824           | 8            | AT1G17890                              | AT1G26160 | AT1G63450 | AT3G12290 | AT3G57630 | AT4G00040 |
|                      |              | AT4G16210                              | AT4G20460 |           |           |           |           |
| GO:0003871           | 1            | AT5G20980                              |           |           |           |           |           |
| GO:0003872           | 1            | AT5G61580                              |           |           |           |           |           |
| GO:0003899           | 1            | AT3G57660                              |           |           |           |           |           |
| GO:0003924           | 1            | AT3G54840                              |           |           |           |           |           |
| GO:0003979           | 1            | AT3G29360                              |           |           |           |           |           |
| GO:0003984           | 1            | AT5G16290                              |           |           |           |           |           |
| GO:0003989           | 1            | AT5G16390                              |           |           |           |           |           |
| GO:0003991           | 1            | AT3G57560                              |           |           |           |           |           |

**Cluster 33 (con.)**

| <b>GO Identifier</b> | <b>#Loci</b> | <b>Associated Loci (Left to Right)</b> |           |           |           |           |           |  |
|----------------------|--------------|----------------------------------------|-----------|-----------|-----------|-----------|-----------|--|
| GO:0003993           | 1            | AT2G27190                              |           |           |           |           |           |  |
| GO:0004028           | 2            | AT1G74920                              | AT3G24503 |           |           |           |           |  |
| GO:0004029           | 1            | AT3G24503                              |           |           |           |           |           |  |
| GO:0004044           | 1            | AT2G16570                              |           |           |           |           |           |  |
| GO:0004047           | 1            | AT4G12130                              |           |           |           |           |           |  |
| GO:0004089           | 1            | AT1G70410                              |           |           |           |           |           |  |
| GO:0004157           | 1            | AT5G12200                              |           |           |           |           |           |  |
| GO:0004340           | 1            | AT2G19860                              |           |           |           |           |           |  |
| GO:0004345           | 1            | AT3G27300                              |           |           |           |           |           |  |
| GO:0004356           | 1            | AT3G53180                              |           |           |           |           |           |  |
| GO:0004395           | 1            | AT2G30920                              |           |           |           |           |           |  |
| GO:0004396           | 1            | AT2G19860                              |           |           |           |           |           |  |
| GO:0004439           | 1            | AT3G51830                              |           |           |           |           |           |  |
| GO:0004521           | 1            | AT1G14210                              |           |           |           |           |           |  |
| GO:0004601           | 4            | AT1G30870                              | AT2G18980 | AT3G01190 | AT4G26010 |           |           |  |
| GO:0004602           | 1            | AT4G11600                              |           |           |           |           |           |  |
| GO:0004614           | 1            | AT1G70730                              |           |           |           |           |           |  |
| GO:0004635           | 1            | AT1G31860                              |           |           |           |           |           |  |
| GO:0004636           | 1            | AT1G31860                              |           |           |           |           |           |  |
| GO:0004665           | 1            | AT1G15710                              |           |           |           |           |           |  |
| GO:0004743           | 1            | AT5G56350                              |           |           |           |           |           |  |
| GO:0004794           | 1            | AT3G10050                              |           |           |           |           |           |  |
| GO:0004812           | 1            | AT3G02660                              |           |           |           |           |           |  |
| GO:0004820           | 1            | AT3G48110                              |           |           |           |           |           |  |
| GO:0004826           | 1            | AT3G58140                              |           |           |           |           |           |  |
| GO:0004845           | 1            | AT3G53900                              |           |           |           |           |           |  |
| GO:0004871           | 1            | AT2G37670                              |           |           |           |           |           |  |
| GO:0005215           | 4            | AT1G50500                              | AT3G56950 | AT4G01660 | AT5G58270 |           |           |  |
| GO:0005507           | 2            | AT1G62810                              | AT3G29250 |           |           |           |           |  |
| GO:0005509           | 2            | AT1G08450                              | AT1G65540 |           |           |           |           |  |
| GO:0005524           | 9            | AT1G01910                              | AT2G19860 | AT2G34560 | AT3G02660 | AT3G52570 | AT3G58140 |  |
|                      |              | AT5G47040                              | AT5G55200 | AT5G60730 |           |           |           |  |
| GO:0005525           | 5            | AT1G48900                              | AT3G11730 | AT3G54840 | AT4G35860 | AT5G52210 |           |  |
| GO:0005618           | 5            | AT1G74920                              | AT2G16570 | AT4G16500 | AT4G34180 | AT5G27430 |           |  |
| GO:0005643           | 1            | AT4G27640                              |           |           |           |           |           |  |
| GO:0005730           | 4            | AT3G21540                              | AT4G00100 | AT5G22330 | AT5G59910 |           |           |  |
| GO:0005737           | 6            | AT3G08550                              | AT3G13460 | AT3G23600 | AT4G12130 | AT4G27640 | AT5G18900 |  |
| GO:0005739           | 23           | AT1G19140                              | AT1G50500 | AT1G65540 | AT2G19860 | AT2G40800 | AT3G01290 |  |
|                      |              | AT3G02660                              | AT3G10260 | AT3G15660 | AT3G17910 | AT3G46560 | AT3G48110 |  |
|                      |              | AT3G52570                              | AT3G58140 | AT3G58840 | AT4G11600 | AT4G29430 | AT5G25940 |  |
|                      |              | AT5G27395                              | AT5G43430 | AT5G55200 | AT5G56730 | AT5G58270 |           |  |
| GO:0005740           | 1            | AT2G30920                              |           |           |           |           |           |  |
| GO:0005743           | 3            | AT1G25380                              | AT2G22500 | AT3G46560 |           |           |           |  |
| GO:0005744           | 1            | AT5G27395                              |           |           |           |           |           |  |
| GO:0005746           | 1            | AT4G01660                              |           |           |           |           |           |  |
| GO:0005758           | 1            | AT3G46560                              |           |           |           |           |           |  |
| GO:0005759           | 3            | AT2G41600                              | AT5G02050 | AT5G05990 |           |           |           |  |
| GO:0005769           | 1            | AT3G54840                              |           |           |           |           |           |  |
| GO:0005773           | 11           | AT1G66580                              | AT1G78660 | AT2G34585 | AT3G01290 | AT3G07470 | AT3G52640 |  |
|                      |              | AT4G16500                              | AT4G25570 | AT4G29430 | AT5G04710 | AT5G54500 |           |  |
| GO:0005777           | 3            | AT1G74910                              | AT3G15290 | AT4G16210 |           |           |           |  |
| GO:0005778           | 1            | AT4G04470                              |           |           |           |           |           |  |
| GO:0005783           | 10           | AT1G08450                              | AT1G72280 | AT3G03050 | AT3G10260 | AT3G23190 | AT3G51440 |  |
|                      |              | AT3G52190                              | AT3G56950 | AT4G21180 | AT5G47420 |           |           |  |
| GO:0005786           | 1            | AT1G48900                              |           |           |           |           |           |  |
| GO:0005788           | 1            | AT1G75940                              |           |           |           |           |           |  |
| GO:0005794           | 7            | AT1G06890                              | AT1G72480 | AT2G38650 | AT3G03050 | AT3G16200 | AT3G27230 |  |
|                      |              | AT3G28480                              |           |           |           |           |           |  |
| GO:0005829           | 3            | AT3G05420                              | AT3G27300 | AT4G11600 |           |           |           |  |
| GO:0005834           | 2            | AT2G37670                              | AT3G21540 |           |           |           |           |  |



**Cluster 33 (con.)**

| <b>GO Identifier</b> | <b>#Loci</b> | <b>Associated Loci (Left to Right)</b> |           |           |           |           |           |
|----------------------|--------------|----------------------------------------|-----------|-----------|-----------|-----------|-----------|
| GO:0005839           | 2            | AT3G27430                              | AT5G40580 |           |           |           |           |
| GO:0005840           | 6            | AT1G66580                              | AT3G12370 | AT3G18760 | AT4G31460 | AT5G46160 | AT5G64670 |
| GO:0005886           | 27           | AT1G04810                              | AT1G29250 | AT1G63110 | AT1G66580 | AT1G70410 | AT1G70730 |
|                      |              | AT2G22125                              | AT2G34585 | AT3G01290 | AT3G03050 | AT3G08550 | AT3G09740 |
|                      |              | AT3G11730                              | AT3G23600 | AT3G27020 | AT3G27890 | AT3G28480 | AT3G52190 |
|                      |              | AT3G52640                              | AT3G55920 | AT4G00710 | AT4G11600 | AT4G16180 | AT4G21180 |
|                      |              | AT4G23640                              | AT4G27720 | AT5G54500 |           |           |           |
| GO:0005945           | 1            | AT5G61580                              |           |           |           |           |           |
| GO:0006006           | 1            | AT3G27300                              |           |           |           |           |           |
| GO:0006014           | 1            | AT1G17160                              |           |           |           |           |           |
| GO:0006096           | 2            | AT5G56350                              | AT5G61580 |           |           |           |           |
| GO:0006334           | 1            | AT5G59910                              |           |           |           |           |           |
| GO:0006350           | 1            | AT3G57660                              |           |           |           |           |           |
| GO:0006364           | 1            | AT3G21540                              |           |           |           |           |           |
| GO:0006396           | 1            | AT5G14580                              |           |           |           |           |           |
| GO:0006402           | 1            | AT5G14580                              |           |           |           |           |           |
| GO:0006412           | 11           | AT1G66580                              | AT3G06040 | AT3G12370 | AT3G18760 | AT3G63190 | AT4G00100 |
|                      |              | AT4G29430                              | AT4G31460 | AT5G23740 | AT5G46160 | AT5G64670 |           |
| GO:0006418           | 1            | AT3G02660                              |           |           |           |           |           |
| GO:0006426           | 1            | AT3G48110                              |           |           |           |           |           |
| GO:0006432           | 1            | AT3G58140                              |           |           |           |           |           |
| GO:0006457           | 4            | AT1G08450                              | AT3G55920 | AT4G21180 | AT5G55200 |           |           |
| GO:0006464           | 1            | AT2G18030                              |           |           |           |           |           |
| GO:0006465           | 1            | AT5G27430                              |           |           |           |           |           |
| GO:0006467           | 1            | AT1G72280                              |           |           |           |           |           |
| GO:0006486           | 1            | AT5G53340                              |           |           |           |           |           |
| GO:0006499           | 6            | AT1G14060                              | AT3G01290 | AT3G21400 | AT3G53180 | AT3G54840 | AT4G00710 |
| GO:0006506           | 1            | AT1G63110                              |           |           |           |           |           |
| GO:0006508           | 4            | AT2G22970                              | AT4G04860 | AT5G04710 | AT5G56730 |           |           |
| GO:0006511           | 3            | AT1G04810                              | AT3G27430 | AT5G40580 |           |           |           |
| GO:0006526           | 1            | AT3G57560                              |           |           |           |           |           |
| GO:0006546           | 1            | AT4G12130                              |           |           |           |           |           |
| GO:0006552           | 1            | AT5G43430                              |           |           |           |           |           |
| GO:0006566           | 1            | AT3G10050                              |           |           |           |           |           |
| GO:0006571           | 1            | AT1G15710                              |           |           |           |           |           |
| GO:0006612           | 1            | AT3G09740                              |           |           |           |           |           |
| GO:0006617           | 1            | AT1G48900                              |           |           |           |           |           |
| GO:0006626           | 1            | AT3G46560                              |           |           |           |           |           |
| GO:0006631           | 1            | AT3G15290                              |           |           |           |           |           |
| GO:0006633           | 2            | AT4G13050                              | AT5G16390 |           |           |           |           |
| GO:0006744           | 2            | AT1G19140                              | AT2G30920 |           |           |           |           |
| GO:0006810           | 4            | AT1G25380                              | AT1G50500 | AT2G22500 | AT3G56950 |           |           |
| GO:0006813           | 1            | AT4G23640                              |           |           |           |           |           |
| GO:0006817           | 1            | AT3G52190                              |           |           |           |           |           |
| GO:0006820           | 2            | AT1G01910                              | AT5G60730 |           |           |           |           |
| GO:0006839           | 2            | AT1G25380                              | AT2G22500 |           |           |           |           |
| GO:0006857           | 1            | AT3G27020                              |           |           |           |           |           |
| GO:0006869           | 1            | AT3G05420                              |           |           |           |           |           |
| GO:0006886           | 2            | AT3G09740                              | AT5G27395 |           |           |           |           |
| GO:0006888           | 1            | AT3G52190                              |           |           |           |           |           |
| GO:0006890           | 1            | AT1G50500                              |           |           |           |           |           |
| GO:0006950           | 1            | AT3G53990                              |           |           |           |           |           |
| GO:0006970           | 1            | AT1G50500                              |           |           |           |           |           |
| GO:0006979           | 4            | AT1G30870                              | AT2G18980 | AT3G01190 | AT4G26010 |           |           |
| GO:0007264           | 3            | AT3G11730                              | AT4G35860 | AT5G52210 |           |           |           |
| GO:0007568           | 1            | AT4G28050                              |           |           |           |           |           |
| GO:0008113           | 1            | AT2G18030                              |           |           |           |           |           |
| GO:0008152           | 7            | AT1G20560                              | AT1G74920 | AT2G16570 | AT3G15290 | AT3G29250 | AT4G16210 |
|                      |              |                                        | AT5G10830 |           |           |           |           |
| GO:0008168           | 1            | AT5G10830                              |           |           |           |           |           |

**Cluster 33 (con.)**

| <b>GO Identifier</b> | <b>#Loci</b> | <b>Associated Loci (Left to Right)</b> |           |           |           |           |           |
|----------------------|--------------|----------------------------------------|-----------|-----------|-----------|-----------|-----------|
| GO:0008233           | 2            | AT3G27430                              | AT5G40580 |           |           |           |           |
| GO:0008236           | 1            | AT5G47040                              |           |           |           |           |           |
| GO:0008284           | 1            | AT4G32880                              |           |           |           |           |           |
| GO:0008312           | 1            | AT1G48900                              |           |           |           |           |           |
| GO:0008415           | 1            | AT4G00040                              |           |           |           |           |           |
| GO:0008417           | 1            | AT2G15390                              |           |           |           |           |           |
| GO:0008514           | 1            | AT1G48230                              |           |           |           |           |           |
| GO:0008535           | 1            | AT3G17910                              |           |           |           |           |           |
| GO:0008540           | 1            | AT1G04810                              |           |           |           |           |           |
| GO:0008565           | 3            | AT2G45070                              | AT3G09740 | AT4G27640 |           |           |           |
| GO:0008691           | 1            | AT3G15290                              |           |           |           |           |           |
| GO:0008705           | 1            | AT5G20980                              |           |           |           |           |           |
| GO:0008752           | 1            | AT3G27890                              |           |           |           |           |           |
| GO:0008805           | 1            | AT4G25570                              |           |           |           |           |           |
| GO:0008865           | 1            | AT2G19860                              |           |           |           |           |           |
| GO:0009051           | 1            | AT3G27300                              |           |           |           |           |           |
| GO:0009055           | 2            | AT1G72280                              | AT5G43430 |           |           |           |           |
| GO:0009058           | 2            | AT1G73160                              | AT1G74910 |           |           |           |           |
| GO:0009082           | 1            | AT5G16290                              |           |           |           |           |           |
| GO:0009086           | 1            | AT5G20980                              |           |           |           |           |           |
| GO:0009097           | 1            | AT3G10050                              |           |           |           |           |           |
| GO:0009113           | 1            | AT2G16570                              |           |           |           |           |           |
| GO:0009116           | 1            | AT3G53900                              |           |           |           |           |           |
| GO:0009225           | 1            | AT4G20460                              |           |           |           |           |           |
| GO:0009247           | 1            | AT5G01220                              |           |           |           |           |           |
| GO:0009374           | 1            | AT5G16390                              |           |           |           |           |           |
| GO:0009396           | 1            | AT3G12290                              |           |           |           |           |           |
| GO:0009399           | 1            | AT3G53180                              |           |           |           |           |           |
| GO:0009505           | 3            | AT2G22970                              | AT2G27190 | AT5G04960 |           |           |           |
| GO:0009507           | 33           | AT1G15710                              | AT1G17160 | AT1G26160 | AT1G31860 | AT1G67930 | AT2G25830 |
|                      |              | AT2G45990                              | AT3G02660 | AT3G10050 | AT3G12290 | AT3G27300 | AT3G27890 |
|                      |              | AT3G48110                              | AT3G53900 | AT3G57560 | AT3G58140 | AT3G60440 | AT3G63190 |
|                      |              | AT4G11600                              | AT4G13050 | AT4G13200 | AT4G17040 | AT4G25570 | AT4G35860 |
|                      |              | AT5G01220                              | AT5G16390 | AT5G16660 | AT5G19370 | AT5G20980 | AT5G22330 |
|                      |              | AT5G56730                              | AT5G58270 | AT5G61580 |           |           |           |
| GO:0009532           | 1            | AT4G17040                              |           |           |           |           |           |
| GO:0009535           | 3            | AT3G48890                              | AT4G13200 | AT5G16660 |           |           |           |
| GO:0009536           | 5            | AT1G65540                              | AT2G19860 | AT3G58840 | AT5G56730 | AT5G58270 |           |
| GO:0009543           | 1            | AT3G08550                              |           |           |           |           |           |
| GO:0009570           | 6            | AT1G17160                              | AT2G45990 | AT3G27890 | AT3G48110 | AT3G63190 | AT4G17040 |
| GO:0009579           | 2            | AT3G63190                              | AT4G13200 |           |           |           |           |
| GO:0009651           | 6            | AT1G14210                              | AT3G23600 | AT3G27890 | AT4G11600 | AT4G34180 | AT5G20350 |
| GO:0009672           | 1            | AT2G17500                              |           |           |           |           |           |
| GO:0009699           | 2            | AT3G24503                              | AT4G00040 |           |           |           |           |
| GO:0009742           | 1            | AT4G00710                              |           |           |           |           |           |
| GO:0009747           | 1            | AT2G19860                              |           |           |           |           |           |
| GO:0009749           | 1            | AT3G08550                              |           |           |           |           |           |
| GO:0009793           | 4            | AT2G30920                              | AT3G02660 | AT3G46560 | AT3G48110 |           |           |
| GO:0009817           | 1            | AT5G22330                              |           |           |           |           |           |
| GO:0009821           | 1            | AT3G51440                              |           |           |           |           |           |
| GO:0009826           | 2            | AT3G08550                              | AT4G23640 |           |           |           |           |
| GO:0009831           | 1            | AT3G08550                              |           |           |           |           |           |
| GO:0009832           | 1            | AT3G03050                              |           |           |           |           |           |
| GO:0009926           | 1            | AT2G17500                              |           |           |           |           |           |
| GO:0009932           | 3            | AT4G23640                              | AT5G20350 | AT5G49270 |           |           |           |
| GO:0009941           | 5            | AT1G70410                              | AT4G17040 | AT5G01220 | AT5G16660 | AT5G58270 |           |
| GO:0009965           | 1            | AT4G00100                              |           |           |           |           |           |
| GO:0010009           | 1            | AT3G54840                              |           |           |           |           |           |
| GO:0010014           | 1            | AT4G32880                              |           |           |           |           |           |
| GO:0010053           | 1            | AT5G49270                              |           |           |           |           |           |

**Cluster 33 (con.)**

| <b>GO Identifier</b> | <b>#Loci</b> | <b>Associated Loci (Left to Right)</b> |           |           |           |           |           |  |
|----------------------|--------------|----------------------------------------|-----------|-----------|-----------|-----------|-----------|--|
| GO:0010072           | 1            | AT4G32880                              |           |           |           |           |           |  |
| GO:0010089           | 1            | AT4G32880                              |           |           |           |           |           |  |
| GO:0010090           | 1            | AT4G00100                              |           |           |           |           |           |  |
| GO:0010181           | 1            | AT5G54500                              |           |           |           |           |           |  |
| GO:0010182           | 1            | AT2G19860                              |           |           |           |           |           |  |
| GO:0010287           | 1            | AT4G13200                              |           |           |           |           |           |  |
| GO:0010288           | 1            | AT5G58270                              |           |           |           |           |           |  |
| GO:0010420           | 1            | AT2G30920                              |           |           |           |           |           |  |
| GO:0010583           | 1            | AT3G03050                              |           |           |           |           |           |  |
| GO:0012501           | 1            | AT2G19860                              |           |           |           |           |           |  |
| GO:0015031           | 3            | AT2G45070                              | AT3G11730 | AT4G35860 |           |           |           |  |
| GO:0015074           | 1            | AT2G25830                              |           |           |           |           |           |  |
| GO:0015079           | 1            | AT4G23640                              |           |           |           |           |           |  |
| GO:0015198           | 1            | AT3G27020                              |           |           |           |           |           |  |
| GO:0015450           | 2            | AT3G46560                              | AT5G27395 |           |           |           |           |  |
| GO:0015934           | 1            | AT3G06040                              |           |           |           |           |           |  |
| GO:0015976           | 1            | AT1G70410                              |           |           |           |           |           |  |
| GO:0015996           | 1            | AT5G43430                              |           |           |           |           |           |  |
| GO:0016020           | 17           | AT1G01910                              | AT1G06890 | AT1G63450 | AT1G75940 | AT2G15390 | AT3G01290 |  |
|                      |              | AT3G56950                              | AT3G57630 | AT3G58140 | AT4G00100 | AT4G00710 | AT4G23640 |  |
|                      |              | AT5G16660                              | AT5G23740 | AT5G53340 | AT5G54500 | AT5G60730 |           |  |
| GO:0016021           | 5            | AT2G17500                              | AT2G24170 | AT3G09740 | AT4G25570 | AT4G28050 |           |  |
| GO:0016036           | 3            | AT2G27190                              | AT3G52190 | AT5G01220 |           |           |           |  |
| GO:0016051           | 2            | AT2G38650                              | AT5G47780 |           |           |           |           |  |
| GO:0016208           | 1            | AT1G20560                              |           |           |           |           |           |  |
| GO:0016417           | 1            | AT5G20350                              |           |           |           |           |           |  |
| GO:0016485           | 1            | AT3G52640                              |           |           |           |           |           |  |
| GO:0016597           | 1            | AT5G16290                              |           |           |           |           |           |  |
| GO:0016655           | 1            | AT5G54500                              |           |           |           |           |           |  |
| GO:0016671           | 1            | AT1G72280                              |           |           |           |           |           |  |
| GO:0016706           | 3            | AT3G28480                              | AT5G18900 | AT5G66060 |           |           |           |  |
| GO:0016747           | 1            | AT4G00040                              |           |           |           |           |           |  |
| GO:0016757           | 9            | AT1G73160                              | AT2G15390 | AT2G38650 | AT3G03050 | AT5G01220 | AT5G22740 |  |
|                      |              | AT5G38460                              | AT5G47780 | AT5G53340 |           |           |           |  |
| GO:0016758           | 1            | AT5G53340                              |           |           |           |           |           |  |
| GO:0016759           | 1            | AT3G03050                              |           |           |           |           |           |  |
| GO:0016779           | 1            | AT1G74910                              |           |           |           |           |           |  |
| GO:0016787           | 3            | AT1G05620                              | AT3G09690 | AT3G23600 |           |           |           |  |
| GO:0016844           | 1            | AT3G51440                              |           |           |           |           |           |  |
| GO:0016853           | 1            | AT5G19370                              |           |           |           |           |           |  |
| GO:0016887           | 3            | AT1G50140                              | AT2G34560 | AT5G16930 |           |           |           |  |
| GO:0017004           | 1            | AT4G01660                              |           |           |           |           |           |  |
| GO:0018401           | 3            | AT3G28480                              | AT5G18900 | AT5G66060 |           |           |           |  |
| GO:0019285           | 1            | AT1G74920                              |           |           |           |           |           |  |
| GO:0019303           | 1            | AT1G17160                              |           |           |           |           |           |  |
| GO:0019408           | 1            | AT5G58784                              |           |           |           |           |           |  |
| GO:0019538           | 1            | AT2G34560                              |           |           |           |           |           |  |
| GO:0019762           | 1            | AT5G48180                              |           |           |           |           |           |  |
| GO:0020037           | 1            | AT3G48890                              |           |           |           |           |           |  |
| GO:0022626           | 2            | AT1G66580                              | AT4G29430 |           |           |           |           |  |
| GO:0022627           | 3            | AT4G00100                              | AT4G29430 | AT5G23740 |           |           |           |  |
| GO:0030163           | 1            | AT1G04810                              |           |           |           |           |           |  |
| GO:0030176           | 1            | AT4G21180                              |           |           |           |           |           |  |
| GO:0030234           | 1            | AT4G16500                              |           |           |           |           |           |  |
| GO:0030244           | 1            | AT3G08550                              |           |           |           |           |           |  |
| GO:0030246           | 1            | AT5G49270                              |           |           |           |           |           |  |
| GO:0030599           | 1            | AT5G04960                              |           |           |           |           |           |  |
| GO:0030742           | 1            | AT3G11730                              |           |           |           |           |           |  |
| GO:0032312           | 1            | AT2G37550                              |           |           |           |           |           |  |
| GO:0040014           | 1            | AT5G58270                              |           |           |           |           |           |  |

**Cluster 33 (con.)**

| <u>GO Identifier</u> | <u>#Loci</u> | <u>Associated Loci (Left to Right)</u> |           |           |           |
|----------------------|--------------|----------------------------------------|-----------|-----------|-----------|
| GO:0042350           | 1            | AT1G17890                              |           |           |           |
| GO:0042450           | 1            | AT3G57560                              |           |           |           |
| GO:0042545           | 1            | AT5G04960                              |           |           |           |
| GO:0042546           | 1            | AT2G15390                              |           |           |           |
| GO:0042626           | 1            | AT5G58270                              |           |           |           |
| GO:0042742           | 2            | AT3G27890                              | AT3G63190 |           |           |
| GO:0045022           | 1            | AT3G54840                              |           |           |           |
| GO:0045454           | 1            | AT3G15660                              |           |           |           |
| GO:0045547           | 1            | AT5G58784                              |           |           |           |
| GO:0045597           | 1            | AT4G32880                              |           |           |           |
| GO:0045995           | 1            | AT3G48110                              |           |           |           |
| GO:0046506           | 1            | AT5G01220                              |           |           |           |
| GO:0046510           | 1            | AT5G01220                              |           |           |           |
| GO:0046686           | 4            | AT1G70730                              | AT3G27300 | AT4G11600 | AT5G58270 |
| GO:0046872           | 1            | AT3G15660                              |           |           |           |
| GO:0046900           | 1            | AT1G78660                              |           |           |           |
| GO:0046914           | 1            | AT3G48890                              |           |           |           |
| GO:0047262           | 2            | AT2G38650                              | AT5G47780 |           |           |
| GO:0048507           | 1            | AT5G22330                              |           |           |           |
| GO:0048765           | 1            | AT5G49270                              |           |           |           |
| GO:0050269           | 1            | AT3G24503                              |           |           |           |
| GO:0050660           | 1            | AT1G72280                              |           |           |           |
| GO:0051753           | 1            | AT5G22740                              |           |           |           |
| GO:0055114           | 1            | AT5G54500                              |           |           |           |

**Cluster 34**

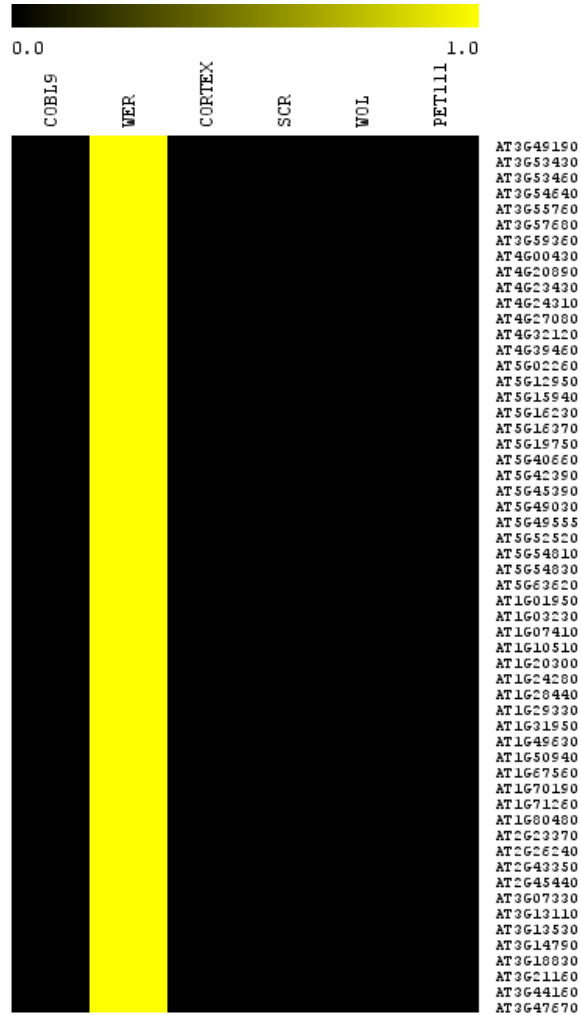

**Cluster 34**

|           |           |           |           |           |
|-----------|-----------|-----------|-----------|-----------|
| AT1G01950 | AT2G23370 | AT3G07330 | AT4G00430 | AT5G02260 |
| AT1G03230 | AT2G26240 | AT3G13110 | AT4G20890 | AT5G12950 |
| AT1G07410 | AT2G43350 | AT3G13530 | AT4G23430 | AT5G15940 |
| AT1G10510 | AT2G45440 | AT3G14790 | AT4G24310 | AT5G16230 |
| AT1G20300 |           | AT3G18830 | AT4G27080 | AT5G16370 |
| AT1G24280 |           | AT3G21160 | AT4G32120 | AT5G19750 |
| AT1G28440 |           | AT3G44160 | AT4G39460 | AT5G40660 |
| AT1G29330 |           | AT3G47670 |           | AT5G42390 |
| AT1G31950 |           | AT3G49190 |           | AT5G45390 |
| AT1G49630 |           | AT3G53430 |           | AT5G49030 |
| AT1G50940 |           | AT3G53460 |           | AT5G49555 |
| AT1G67560 |           | AT3G54640 |           | AT5G52520 |
| AT1G70190 |           | AT3G55760 |           | AT5G54810 |
| AT1G71260 |           | AT3G57680 |           | AT5G54830 |
| AT1G80480 |           | AT3G59360 |           | AT5G63620 |

| Cluster 34<br>GO identifier | Description                                                                                           | #<br>Associated<br>to the GO<br>in Cluster | Total # in<br>Cluster | p-value     |
|-----------------------------|-------------------------------------------------------------------------------------------------------|--------------------------------------------|-----------------------|-------------|
| GO:0005739                  | mitochondrion                                                                                         | 12                                         | 56                    | 6.36E-07    |
| GO:0009507                  | chloroplast                                                                                           | 19                                         | 56                    | 4.44E-06    |
| GO:0009570                  | chloroplast stroma                                                                                    | 7                                          | 56                    | 3.90E-05    |
| GO:0004812                  | aminoacyl-tRNA ligase activity                                                                        | 2                                          | 56                    | 0.001696729 |
| GO:0006418                  | tRNA aminoacylation for protein translation                                                           | 2                                          | 56                    | 0.002001514 |
| GO:0048481                  | ovule development                                                                                     | 2                                          | 56                    | 0.002329645 |
| GO:0050660                  | FAD binding                                                                                           | 2                                          | 56                    | 0.002329645 |
| GO:0000095                  | S-adenosylmethionine transmembrane transporter activity                                               | 1                                          | 56                    | 0.002685207 |
| GO:0005046                  | KDEL sequence binding                                                                                 | 1                                          | 56                    | 0.002685207 |
| GO:0005365                  | myo-inositol transmembrane transporter activity                                                       | 1                                          | 56                    | 0.002685207 |
| GO:0006621                  | protein retention in ER lumen                                                                         | 1                                          | 56                    | 0.002685207 |
| GO:0010109                  | regulation of photosynthesis                                                                          | 1                                          | 56                    | 0.002685207 |
| GO:0015148                  | D-xylose transmembrane transporter activity                                                           | 1                                          | 56                    | 0.002685207 |
| GO:0015575                  | mannitol transmembrane transporter activity                                                           | 1                                          | 56                    | 0.002685207 |
| GO:0015576                  | sorbitol transmembrane transporter activity                                                           | 1                                          | 56                    | 0.002685207 |
| GO:0015591                  | D-ribose transmembrane transporter activity                                                           | 1                                          | 56                    | 0.002685207 |
| GO:0015805                  | S-adenosylmethionine transport                                                                        | 1                                          | 56                    | 0.002685207 |
| GO:0016705                  | oxidoreductase activity, acting on paired donors, with incorporation or reduction of molecular oxygen | 1                                          | 56                    | 0.002685207 |
| GO:0009658                  | chloroplast organization                                                                              | 2                                          | 56                    | 0.004084833 |
| GO:0005794                  | Golgi apparatus                                                                                       | 3                                          | 56                    | 0.004550286 |
| GO:0004571                  | mannosyl-oligosaccharide 1,2-alpha-mannosidase activity                                               | 1                                          | 56                    | 0.005356251 |
| GO:0008840                  | dihydrodipicolinate synthase activity                                                                 | 1                                          | 56                    | 0.005356251 |
| GO:0015168                  | glycerol transmembrane transporter activity                                                           | 1                                          | 56                    | 0.005356251 |
| GO:0051605                  | protein maturation via proteolysis                                                                    | 1                                          | 56                    | 0.005356251 |
| GO:0004834                  | tryptophan synthase activity                                                                          | 1                                          | 56                    | 0.008013186 |
| GO:0005354                  | galactose transmembrane transporter activity                                                          | 1                                          | 56                    | 0.008013186 |
| GO:0010280                  | UDP-L-rhamnose synthase activity                                                                      | 1                                          | 56                    | 0.008013186 |
| GO:0009001                  | serine O-acetyltransferase activity                                                                   | 1                                          | 56                    | 0.010656066 |
| GO:0010253                  | UDP-rhamnose biosynthetic process                                                                     | 1                                          | 56                    | 0.010656066 |
| GO:0015145                  | monosaccharide transmembrane transporter activity                                                     | 1                                          | 56                    | 0.010656066 |
| GO:0005355                  | glucose transmembrane transporter activity                                                            | 1                                          | 56                    | 0.013284948 |
| GO:0005625                  | soluble fraction                                                                                      | 1                                          | 56                    | 0.013284948 |
| GO:0005801                  | cis-Golgi network                                                                                     | 1                                          | 56                    | 0.013284948 |
| GO:0015780                  | nucleotide-sugar transport                                                                            | 1                                          | 56                    | 0.013284948 |
| GO:0042631                  | cellular response to water deprivation                                                                | 1                                          | 56                    | 0.013284948 |

| Cluster 34<br>GO identifier<br>(con.) | Description                                                              | #<br>Associated<br>to the GO<br>in Cluster | Total # in<br>Cluster | p-value     |
|---------------------------------------|--------------------------------------------------------------------------|--------------------------------------------|-----------------------|-------------|
| GO:0045300                            | acyl-[acyl-carrier-protein] desaturase activity                          | 1                                          | 56                    | 0.013284948 |
| GO:0009941                            | chloroplast envelope                                                     | 4                                          | 56                    | 0.014243383 |
| GO:0004345                            | glucose-6-phosphate dehydrogenase activity                               | 1                                          | 56                    | 0.015899884 |
| GO:0006006                            | glucose metabolic process                                                | 1                                          | 56                    | 0.015899884 |
| GO:0000139                            | Golgi membrane                                                           | 1                                          | 56                    | 0.01850093  |
| GO:0005338                            | nucleotide-sugar transmembrane transporter activity                      | 1                                          | 56                    | 0.01850093  |
| GO:0009840                            | chloroplastic endopeptidase Clp complex                                  | 1                                          | 56                    | 0.01850093  |
| GO:0016165                            | lipoxygenase activity                                                    | 1                                          | 56                    | 0.01850093  |
| GO:0015031                            | protein transport                                                        | 2                                          | 56                    | 0.019526495 |
| GO:0009051                            | pentose-phosphate shunt, oxidative branch                                | 1                                          | 56                    | 0.021088139 |
| GO:0040007                            | growth                                                                   | 1                                          | 56                    | 0.021088139 |
| GO:0045298                            | tubulin complex                                                          | 1                                          | 56                    | 0.021088139 |
| GO:0004602                            | glutathione peroxidase activity                                          | 1                                          | 56                    | 0.023661566 |
| GO:0009089                            | lysine biosynthetic process via diaminopimelate                          | 1                                          | 56                    | 0.023661566 |
| GO:0019344                            | cysteine biosynthetic process                                            | 1                                          | 56                    | 0.026221264 |
| GO:0016117                            | carotenoid biosynthetic process                                          | 1                                          | 56                    | 0.036323834 |
| GO:0048510                            | regulation of timing of transition from vegetative to reproductive phase | 1                                          | 56                    | 0.036323834 |
| GO:0003756                            | protein disulfide isomerase activity                                     | 1                                          | 56                    | 0.038815687 |
| GO:0048868                            | pollen tube development                                                  | 1                                          | 56                    | 0.038815687 |
| GO:0005768                            | endosome                                                                 | 1                                          | 56                    | 0.04129413  |
| GO:0008266                            | poly(U) binding                                                          | 1                                          | 56                    | 0.04129413  |
| GO:0009504                            | cell plate                                                               | 1                                          | 56                    | 0.04129413  |
| GO:0009508                            | plastid chromosome                                                       | 1                                          | 56                    | 0.04129413  |
| GO:0009532                            | plastid stroma                                                           | 1                                          | 56                    | 0.04129413  |
| GO:0052544                            | callose deposition in cell wall during defense response                  | 1                                          | 56                    | 0.04129413  |
| GO:0009536                            | plastid                                                                  | 2                                          | 56                    | 0.042567057 |
| GO:0006810                            | transport                                                                | 3                                          | 56                    | 0.043709033 |
| GO:0005778                            | peroxisomal membrane                                                     | 1                                          | 56                    | 0.043759214 |
| GO:0008152                            | metabolic process                                                        | 4                                          | 56                    | 0.045840933 |
| GO:0006913                            | nucleocytoplasmic transport                                              | 1                                          | 56                    | 0.046210993 |
| GO:0009225                            | nucleotide-sugar metabolic process                                       | 1                                          | 56                    | 0.046210993 |
| GO:0000162                            | tryptophan biosynthetic process                                          | 1                                          | 56                    | 0.048649518 |
| GO:0004872                            | receptor activity                                                        | 1                                          | 56                    | 0.053487016 |
| GO:0009831                            | plant-type cell wall modification during multidimensional cell growth    | 1                                          | 56                    | 0.053487016 |
| GO:0000287                            | magnesium ion binding                                                    | 1                                          | 56                    | 0.060645154 |
| GO:0009295                            | nucleoid                                                                 | 1                                          | 56                    | 0.063005243 |
| GO:0048316                            | seed development                                                         | 1                                          | 56                    | 0.063005243 |
| GO:0009579                            | thylakoid                                                                | 2                                          | 56                    | 0.065691827 |
| GO:0009553                            | embryo sac development                                                   | 1                                          | 56                    | 0.067686789 |
| GO:0015250                            | water channel activity                                                   | 1                                          | 56                    | 0.070008348 |
| GO:0009828                            | plant-type cell wall loosening                                           | 1                                          | 56                    | 0.074613291 |
| GO:0006486                            | protein amino acid glycosylation                                         | 1                                          | 56                    | 0.076896774 |
| GO:0008236                            | serine-type peptidase activity                                           | 1                                          | 56                    | 0.079167665 |
| GO:0042542                            | response to hydrogen peroxide                                            | 1                                          | 56                    | 0.079167665 |
| GO:0016020                            | membrane                                                                 | 6                                          | 56                    | 0.08175283  |
| GO:0015934                            | large ribosomal subunit                                                  | 1                                          | 56                    | 0.083671869 |
| GO:0016759                            | cellulose synthase activity                                              | 1                                          | 56                    | 0.085905281 |
| GO:0008643                            | carbohydrate transport                                                   | 1                                          | 56                    | 0.092531346 |
| GO:0009738                            | abscisic acid mediated signaling                                         | 1                                          | 56                    | 0.092531346 |
| GO:0004497                            | monooxygenase activity                                                   | 1                                          | 56                    | 0.094715474 |
| GO:0005198                            | structural molecule activity                                             | 1                                          | 56                    | 0.099047179 |

| Cluster 34<br>GO identifier<br>(con.) | Description                                                      | #<br>Associated<br>to the GO<br>in Cluster | Total # in<br>Cluster | p-value     |
|---------------------------------------|------------------------------------------------------------------|--------------------------------------------|-----------------------|-------------|
| GO:0016491                            | oxidoreductase activity                                          | 2                                          | 56                    | 0.1004172   |
| GO:0006839                            | mitochondrial transport                                          | 1                                          | 56                    | 0.101194852 |
| GO:0046910                            | pectinesterase inhibitor activity                                | 1                                          | 56                    | 0.101194852 |
| GO:0005875                            | microtubule associated complex                                   | 1                                          | 56                    | 0.105454083 |
| GO:0006633                            | fatty acid biosynthetic process                                  | 1                                          | 56                    | 0.111753351 |
| GO:0016829                            | lyase activity                                                   | 1                                          | 56                    | 0.115893696 |
| GO:0016021                            | integral to membrane                                             | 2                                          | 56                    | 0.116052898 |
| GO:0046686                            | response to cadmium ion                                          | 2                                          | 56                    | 0.132670713 |
| GO:0016758                            | transferase activity, transferring hexosyl groups                | 1                                          | 56                    | 0.133950291 |
| GO:0003735                            | structural constituent of ribosome                               | 2                                          | 56                    | 0.13630355  |
| GO:0003777                            | microtubule motor activity                                       | 1                                          | 56                    | 0.141679422 |
| GO:0007264                            | small GTPase mediated signal transduction                        | 1                                          | 56                    | 0.141679422 |
| GO:0007242                            | intracellular signaling cascade                                  | 1                                          | 56                    | 0.143583771 |
| GO:0005524                            | ATP binding                                                      | 3                                          | 56                    | 0.148883531 |
| GO:0048364                            | root development                                                 | 1                                          | 56                    | 0.152940135 |
| GO:0009543                            | chloroplast thylakoid lumen                                      | 1                                          | 56                    | 0.154778642 |
| GO:0009055                            | electron carrier activity                                        | 1                                          | 56                    | 0.163809751 |
| GO:0005743                            | mitochondrial inner membrane                                     | 1                                          | 56                    | 0.16558399  |
| GO:0006508                            | proteolysis                                                      | 2                                          | 56                    | 0.167029409 |
| GO:0015144                            | carbohydrate transmembrane transporter activity                  | 1                                          | 56                    | 0.16734767  |
| GO:0005351                            | sugar:hydrogen symporter activity                                | 1                                          | 56                    | 0.170843518 |
| GO:0009826                            | unidimensional cell growth                                       | 1                                          | 56                    | 0.172575771 |
| GO:0042254                            | ribosome biogenesis                                              | 1                                          | 56                    | 0.195755272 |
| GO:0022625                            | cytosolic large ribosomal subunit                                | 1                                          | 56                    | 0.206616656 |
| GO:0006886                            | intracellular protein transport                                  | 1                                          | 56                    | 0.229709188 |
| GO:0007169                            | transmembrane receptor protein tyrosine kinase signaling pathway | 1                                          | 56                    | 0.245520229 |
| GO:0042742                            | defense response to bacterium                                    | 1                                          | 56                    | 0.252963328 |
| GO:0009414                            | response to water deprivation                                    | 1                                          | 56                    | 0.255377746 |
| GO:0005509                            | calcium ion binding                                              | 1                                          | 56                    | 0.281866316 |
| GO:0004674                            | protein serine/threonine kinase activity                         | 1                                          | 56                    | 0.295316033 |
| GO:0005525                            | GTP binding                                                      | 1                                          | 56                    | 0.296223361 |
| GO:0005840                            | ribosome                                                         | 1                                          | 56                    | 0.304080008 |
| GO:0007165                            | signal transduction                                              | 1                                          | 56                    | 0.33621264  |
| GO:0009535                            | chloroplast thylakoid membrane                                   | 1                                          | 56                    | 0.345505753 |
| GO:0005783                            | endoplasmic reticulum                                            | 1                                          | 56                    | 0.352785108 |
| GO:0009793                            | embryonic development ending in seed dormancy                    | 1                                          | 56                    | 0.357767164 |
| GO:0003723                            | RNA binding                                                      | 1                                          | 56                    | 0.362420375 |
| GO:0006412                            | translation                                                      | 1                                          | 56                    | 0.362676122 |
| GO:0016757                            | transferase activity, transferring glycosyl groups               | 1                                          | 56                    | 0.362927861 |
| GO:0006952                            | defense response                                                 | 1                                          | 56                    | 0.368568639 |
| GO:0003824                            | catalytic activity                                               | 1                                          | 56                    | 0.37169306  |

#### Cluster 34

| GO Identifier | #Loci | Associated Loci (Left to Right) |
|---------------|-------|---------------------------------|
| GO:0000095    | 1     | AT4G39460                       |
| GO:0000139    | 1     | AT3G59360                       |
| GO:0000162    | 1     | AT3G54640                       |
| GO:0000287    | 1     | AT1G31950                       |
| GO:0003723    | 1     | AT3G53460                       |
| GO:0003735    | 2     | AT1G70190     AT3G53430         |
| GO:0003756    | 1     | AT4G27080                       |
| GO:0003777    | 1     | AT1G01950                       |
| GO:0003824    | 1     | AT3G14790                       |

**Cluster 34 (con.)**

| <b>GO Identifier</b> | <b>#Loci</b> | <b>Associated Loci (Left to Right)</b> |           |           |           |           |           |  |
|----------------------|--------------|----------------------------------------|-----------|-----------|-----------|-----------|-----------|--|
| GO:0004345           | 1            | AT1G24280                              |           |           |           |           |           |  |
| GO:0004497           | 1            | AT5G54830                              |           |           |           |           |           |  |
| GO:0004571           | 1            | AT3G21160                              |           |           |           |           |           |  |
| GO:0004602           | 1            | AT2G43350                              |           |           |           |           |           |  |
| GO:0004674           | 1            | AT1G28440                              |           |           |           |           |           |  |
| GO:0004812           | 2            | AT5G49030                              | AT5G52520 |           |           |           |           |  |
| GO:0004834           | 1            | AT3G54640                              |           |           |           |           |           |  |
| GO:0004872           | 1            | AT1G29330                              |           |           |           |           |           |  |
| GO:0005046           | 1            | AT1G29330                              |           |           |           |           |           |  |
| GO:0005198           | 1            | AT4G20890                              |           |           |           |           |           |  |
| GO:0005338           | 1            | AT3G59360                              |           |           |           |           |           |  |
| GO:0005351           | 1            | AT3G18830                              |           |           |           |           |           |  |
| GO:0005354           | 1            | AT3G18830                              |           |           |           |           |           |  |
| GO:0005355           | 1            | AT3G18830                              |           |           |           |           |           |  |
| GO:0005365           | 1            | AT3G18830                              |           |           |           |           |           |  |
| GO:0005509           | 1            | AT3G21160                              |           |           |           |           |           |  |
| GO:0005524           | 3            | AT1G28440                              | AT5G49030 | AT5G52520 |           |           |           |  |
| GO:0005525           | 1            | AT1G07410                              |           |           |           |           |           |  |
| GO:0005625           | 1            | AT3G14790                              |           |           |           |           |           |  |
| GO:0005739           | 12           | AT1G10510                              | AT1G49630 | AT1G50940 | AT1G70190 | AT1G71260 | AT2G26240 |  |
|                      |              | AT2G43350                              | AT3G13110 | AT4G39460 | AT5G42390 | AT5G49555 | AT5G52520 |  |
| GO:0005743           | 1            | AT4G39460                              |           |           |           |           |           |  |
| GO:0005768           | 1            | AT1G07410                              |           |           |           |           |           |  |
| GO:0005778           | 1            | AT5G19750                              |           |           |           |           |           |  |
| GO:0005783           | 1            | AT1G29330                              |           |           |           |           |           |  |
| GO:0005794           | 3            | AT1G29330                              | AT3G07330 | AT3G21160 |           |           |           |  |
| GO:0005801           | 1            | AT1G29330                              |           |           |           |           |           |  |
| GO:0005840           | 1            | AT3G53430                              |           |           |           |           |           |  |
| GO:0005875           | 1            | AT1G01950                              |           |           |           |           |           |  |
| GO:0006006           | 1            | AT1G24280                              |           |           |           |           |           |  |
| GO:0006412           | 1            | AT1G70190                              |           |           |           |           |           |  |
| GO:0006418           | 2            | AT5G49030                              | AT5G52520 |           |           |           |           |  |
| GO:0006486           | 1            | AT4G32120                              |           |           |           |           |           |  |
| GO:0006508           | 2            | AT1G49630                              | AT5G42390 |           |           |           |           |  |
| GO:0006621           | 1            | AT1G29330                              |           |           |           |           |           |  |
| GO:0006633           | 1            | AT5G16230                              |           |           |           |           |           |  |
| GO:0006810           | 3            | AT3G18830                              | AT4G00430 | AT4G39460 |           |           |           |  |
| GO:0006839           | 1            | AT4G39460                              |           |           |           |           |           |  |
| GO:0006886           | 1            | AT1G07410                              |           |           |           |           |           |  |
| GO:0006913           | 1            | AT1G07410                              |           |           |           |           |           |  |
| GO:0006952           | 1            | AT1G71260                              |           |           |           |           |           |  |
| GO:0007165           | 1            | AT1G07410                              |           |           |           |           |           |  |
| GO:0007169           | 1            | AT1G28440                              |           |           |           |           |           |  |
| GO:0007242           | 1            | AT3G57680                              |           |           |           |           |           |  |
| GO:0007264           | 1            | AT1G07410                              |           |           |           |           |           |  |
| GO:0008152           | 4            | AT1G31950                              | AT5G15940 | AT5G54830 | AT5G63620 |           |           |  |
| GO:0008236           | 1            | AT3G57680                              |           |           |           |           |           |  |
| GO:0008266           | 1            | AT3G53460                              |           |           |           |           |           |  |
| GO:0008643           | 1            | AT3G18830                              |           |           |           |           |           |  |
| GO:0008840           | 1            | AT2G45440                              |           |           |           |           |           |  |
| GO:0009001           | 1            | AT3G13110                              |           |           |           |           |           |  |
| GO:0009051           | 1            | AT1G24280                              |           |           |           |           |           |  |
| GO:0009055           | 1            | AT1G50940                              |           |           |           |           |           |  |
| GO:0009089           | 1            | AT2G45440                              |           |           |           |           |           |  |
| GO:0009225           | 1            | AT3G14790                              |           |           |           |           |           |  |
| GO:0009295           | 1            | AT1G80480                              |           |           |           |           |           |  |
| GO:0009414           | 1            | AT4G00430                              |           |           |           |           |           |  |
| GO:0009504           | 1            | AT1G07410                              |           |           |           |           |           |  |



**Cluster 34 (con.)**

| <b>GO Identifier</b> | <b>#Loci</b> | <b>Associated Loci (Left to Right)</b> |           |           |           |           |           |
|----------------------|--------------|----------------------------------------|-----------|-----------|-----------|-----------|-----------|
| GO:0009507           | 19           | AT1G01950                              | AT1G10510 | AT1G24280 | AT1G49630 | AT1G67560 | AT1G80480 |
|                      |              | AT2G45440                              | AT3G53460 | AT3G54640 | AT3G55760 | AT4G20890 | AT4G39460 |
|                      |              | AT5G02260                              | AT5G16230 | AT5G19750 | AT5G42390 | AT5G45390 | AT5G49030 |
|                      |              | AT5G52520                              |           |           |           |           |           |
| GO:0009508           | 1            | AT1G80480                              |           |           |           |           |           |
| GO:0009532           | 1            | AT5G45390                              |           |           |           |           |           |
| GO:0009535           | 1            | AT5G45390                              |           |           |           |           |           |
| GO:0009536           | 2            | AT1G10510                              | AT4G39460 |           |           |           |           |
| GO:0009543           | 1            | AT3G57680                              |           |           |           |           |           |
| GO:0009553           | 1            | AT5G52520                              |           |           |           |           |           |
| GO:0009570           | 7            | AT1G80480                              | AT3G53460 | AT3G54640 | AT3G55760 | AT5G42390 | AT5G45390 |
|                      |              | AT5G52520                              |           |           |           |           |           |
| GO:0009579           | 2            | AT3G53460                              | AT5G45390 |           |           |           |           |
| GO:0009658           | 2            | AT4G39460                              | AT5G45390 |           |           |           |           |
| GO:0009738           | 1            | AT2G43350                              |           |           |           |           |           |
| GO:0009793           | 1            | AT1G10510                              |           |           |           |           |           |
| GO:0009826           | 1            | AT5G02260                              |           |           |           |           |           |
| GO:0009828           | 1            | AT5G02260                              |           |           |           |           |           |
| GO:0009831           | 1            | AT5G02260                              |           |           |           |           |           |
| GO:0009840           | 1            | AT5G45390                              |           |           |           |           |           |
| GO:0009941           | 4            | AT1G10510                              | AT4G39460 | AT5G19750 | AT5G45390 |           |           |
| GO:0010109           | 1            | AT5G52520                              |           |           |           |           |           |
| GO:0010253           | 1            | AT3G14790                              |           |           |           |           |           |
| GO:0010280           | 1            | AT3G14790                              |           |           |           |           |           |
| GO:0015031           | 2            | AT1G07410                              | AT1G29330 |           |           |           |           |
| GO:0015144           | 1            | AT3G18830                              |           |           |           |           |           |
| GO:0015145           | 1            | AT3G18830                              |           |           |           |           |           |
| GO:0015148           | 1            | AT3G18830                              |           |           |           |           |           |
| GO:0015168           | 1            | AT3G18830                              |           |           |           |           |           |
| GO:0015250           | 1            | AT4G00430                              |           |           |           |           |           |
| GO:0015575           | 1            | AT3G18830                              |           |           |           |           |           |
| GO:0015576           | 1            | AT3G18830                              |           |           |           |           |           |
| GO:0015591           | 1            | AT3G18830                              |           |           |           |           |           |
| GO:0015780           | 1            | AT3G59360                              |           |           |           |           |           |
| GO:0015805           | 1            | AT4G39460                              |           |           |           |           |           |
| GO:0015934           | 1            | AT1G70190                              |           |           |           |           |           |
| GO:0016020           | 6            | AT1G31950                              | AT3G18830 | AT3G53430 | AT3G57680 | AT4G00430 | AT4G32120 |
| GO:0016021           | 2            | AT1G29330                              | AT3G59360 |           |           |           |           |
| GO:0016117           | 1            | AT5G49555                              |           |           |           |           |           |
| GO:0016165           | 1            | AT1G67560                              |           |           |           |           |           |
| GO:0016491           | 2            | AT5G15940                              | AT5G49555 |           |           |           |           |
| GO:0016705           | 1            | AT5G49555                              |           |           |           |           |           |
| GO:0016757           | 1            | AT3G07330                              |           |           |           |           |           |
| GO:0016758           | 1            | AT4G32120                              |           |           |           |           |           |
| GO:0016759           | 1            | AT3G07330                              |           |           |           |           |           |
| GO:0016829           | 1            | AT1G31950                              |           |           |           |           |           |
| GO:0019344           | 1            | AT3G13110                              |           |           |           |           |           |
| GO:0022625           | 1            | AT3G53430                              |           |           |           |           |           |
| GO:0040007           | 1            | AT1G67560                              |           |           |           |           |           |
| GO:0042254           | 1            | AT3G53430                              |           |           |           |           |           |
| GO:0042542           | 1            | AT2G43350                              |           |           |           |           |           |
| GO:0042631           | 1            | AT2G43350                              |           |           |           |           |           |
| GO:0042742           | 1            | AT3G54640                              |           |           |           |           |           |
| GO:0045298           | 1            | AT4G20890                              |           |           |           |           |           |
| GO:0045300           | 1            | AT5G16230                              |           |           |           |           |           |
| GO:0046686           | 2            | AT3G13110                              | AT4G20890 |           |           |           |           |
| GO:0046910           | 1            | AT3G47670                              |           |           |           |           |           |
| GO:0048316           | 1            | AT5G52520                              |           |           |           |           |           |
| GO:0048364           | 1            | AT1G01950                              |           |           |           |           |           |
| GO:0048481           | 2            | AT5G49030                              | AT5G52520 |           |           |           |           |

**Cluster 34 (con.)**

| <u>GO Identifier</u> | <u>#Loci</u> | <u>Associated Loci (Left to Right)</u> |
|----------------------|--------------|----------------------------------------|
| GO:0048510           | 1            | AT5G45390                              |
| GO:0048868           | 1            | AT3G07330                              |
| GO:0050660           | 2            | AT1G50940 AT5G49555                    |
| GO:0051605           | 1            | AT1G49630                              |
| GO:0052544           | 1            | AT3G54640                              |

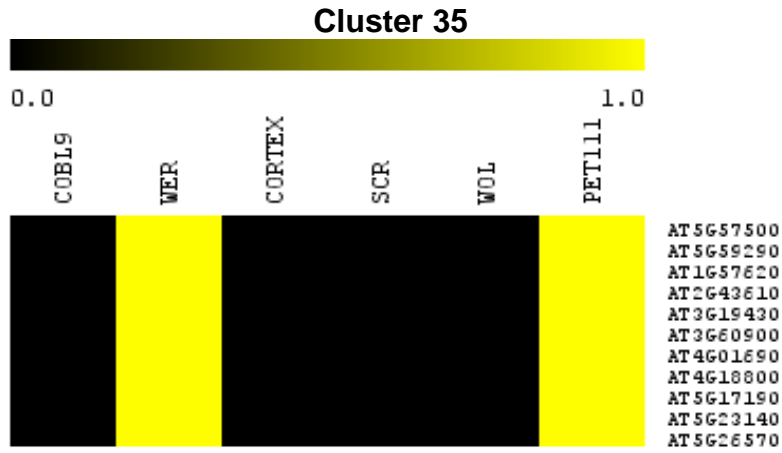

**Cluster 35**

- AT1G57620
- AT2G43610
- AT3G19430
- AT3G60900
- AT4G01690
- AT4G18800
- AT5G17190
- AT5G23140
- AT5G26570
- AT5G57500
- AT5G59290

| Cluster 35<br>GO identifier | Description                                | #<br>Associated<br>to the GO<br>in Cluster | Total # in<br>Cluster | p-value     |
|-----------------------------|--------------------------------------------|--------------------------------------------|-----------------------|-------------|
| GO:0051752                  | phosphoglucan, water dikinase activity     | 1                                          | 11                    | 5.27E-04    |
| GO:0004729                  | protoporphyrinogen oxidase activity        | 1                                          | 11                    | 0.001054397 |
| GO:0019200                  | carbohydrate kinase activity               | 1                                          | 11                    | 0.001580837 |
| GO:0042732                  | D-xylose metabolic process                 | 1                                          | 11                    | 0.001580837 |
| GO:0048040                  | UDP-glucuronate decarboxylase activity     | 1                                          | 11                    | 0.001580837 |
| GO:0008320                  | protein transmembrane transporter activity | 1                                          | 11                    | 0.003157127 |
| GO:0009840                  | chloroplastic endopeptidase Clp complex    | 1                                          | 11                    | 0.003681549 |
| GO:0005982                  | starch metabolic process                   | 1                                          | 11                    | 0.004205466 |
| GO:0005983                  | starch catabolic process                   | 1                                          | 11                    | 0.006817506 |
| GO:0004568                  | chitinase activity                         | 1                                          | 11                    | 0.007338407 |
| GO:0006779                  | porphyrin biosynthetic process             | 1                                          | 11                    | 0.007338407 |
| GO:0009532                  | plastid stroma                             | 1                                          | 11                    | 0.008378704 |
| GO:0009225                  | nucleotide-sugar metabolic process         | 1                                          | 11                    | 0.009416998 |
| GO:0046777                  | protein amino acid autophosphorylation     | 1                                          | 11                    | 0.009935394 |
| GO:0016998                  | cell wall catabolic process                | 1                                          | 11                    | 0.010970686 |
| GO:0009570                  | chloroplast stroma                         | 2                                          | 11                    | 0.013557722 |
| GO:0003824                  | catalytic activity                         | 2                                          | 11                    | 0.014709048 |

| Cluster 35<br>GO identifier<br>(con.) | Description                                        | #<br>Associated<br>to the GO<br>in Cluster | Total # in<br>Cluster | p-value     |
|---------------------------------------|----------------------------------------------------|--------------------------------------------|-----------------------|-------------|
| GO:0005759                            | mitochondrial matrix                               | 1                                          | 11                    | 0.015091909 |
| GO:0006486                            | protein amino acid glycosylation                   | 1                                          | 11                    | 0.016117241 |
| GO:0005199                            | structural constituent of cell wall                | 1                                          | 11                    | 0.019690292 |
| GO:0046658                            | anchored to plasma membrane                        | 1                                          | 11                    | 0.030762855 |
| GO:0007264                            | small GTPase mediated signal transduction          | 1                                          | 11                    | 0.031757717 |
| GO:0015031                            | protein transport                                  | 1                                          | 11                    | 0.042086841 |
| GO:0005886                            | plasma membrane                                    | 3                                          | 11                    | 0.04336576  |
| GO:0006886                            | intracellular protein transport                    | 1                                          | 11                    | 0.057892154 |
| GO:0009536                            | plastid                                            | 1                                          | 11                    | 0.0644424   |
| GO:0005829                            | cytosol                                            | 1                                          | 11                    | 0.083549685 |
| GO:0005525                            | GTP binding                                        | 1                                          | 11                    | 0.084883701 |
| GO:0031225                            | anchored to membrane                               | 1                                          | 11                    | 0.098001779 |
| GO:0009535                            | chloroplast thylakoid membrane                     | 1                                          | 11                    | 0.11611196  |
| GO:0016020                            | membrane                                           | 2                                          | 11                    | 0.124265462 |
| GO:0016757                            | transferase activity, transferring glycosyl groups | 1                                          | 11                    | 0.135781427 |
| GO:0005975                            | carbohydrate metabolic process                     | 1                                          | 11                    | 0.136172333 |
| GO:0009941                            | chloroplast envelope                               | 1                                          | 11                    | 0.163242531 |
| GO:0012505                            | endomembrane system                                | 2                                          | 11                    | 0.233849117 |
| GO:0009507                            | chloroplast                                        | 2                                          | 11                    | 0.237219757 |
| GO:0006355                            | regulation of transcription, DNA-dependent         | 1                                          | 11                    | 0.264722213 |
| GO:0005739                            | mitochondrion                                      | 1                                          | 11                    | 0.278685183 |

### Cluster 35

| <u>GO Identifier</u> | <u>#Loci</u> | <u>Associated Loci (Left to Right)</u> |           |           |
|----------------------|--------------|----------------------------------------|-----------|-----------|
| GO:0003824           | 2            | AT5G26570                              | AT5G59290 |           |
| GO:0004568           | 1            | AT2G43610                              |           |           |
| GO:0004729           | 1            | AT4G01690                              |           |           |
| GO:0005199           | 1            | AT3G19430                              |           |           |
| GO:0005525           | 1            | AT4G18800                              |           |           |
| GO:0005739           | 1            | AT5G23140                              |           |           |
| GO:0005759           | 1            | AT5G23140                              |           |           |
| GO:0005829           | 1            | AT5G59290                              |           |           |
| GO:0005886           | 3            | AT2G43610                              | AT3G60900 | AT4G18800 |
| GO:0005975           | 1            | AT5G26570                              |           |           |
| GO:0005982           | 1            | AT5G26570                              |           |           |
| GO:0005983           | 1            | AT5G26570                              |           |           |
| GO:0006355           | 1            | AT4G18800                              |           |           |
| GO:0006486           | 1            | AT5G57500                              |           |           |
| GO:0006779           | 1            | AT4G01690                              |           |           |
| GO:0006886           | 1            | AT1G57620                              |           |           |
| GO:0007264           | 1            | AT4G18800                              |           |           |
| GO:0008320           | 1            | AT1G57620                              |           |           |
| GO:0009225           | 1            | AT5G59290                              |           |           |
| GO:0009507           | 2            | AT4G01690                              | AT5G26570 |           |
| GO:0009532           | 1            | AT5G23140                              |           |           |
| GO:0009535           | 1            | AT5G23140                              |           |           |
| GO:0009536           | 1            | AT5G26570                              |           |           |
| GO:0009570           | 2            | AT5G23140                              | AT5G26570 |           |
| GO:0009840           | 1            | AT5G23140                              |           |           |
| GO:0009941           | 1            | AT4G01690                              |           |           |
| GO:0012505           | 2            | AT5G17190                              | AT5G57500 |           |
| GO:0015031           | 1            | AT4G18800                              |           |           |
| GO:0016020           | 2            | AT1G57620                              | AT5G57500 |           |
| GO:0016757           | 1            | AT5G57500                              |           |           |
| GO:0016998           | 1            | AT2G43610                              |           |           |

**Cluster 35 (con.)**

| <b>GO Identifier</b> | <b>#Loci</b> | <b>Associated Loci (Left to Right)</b> |
|----------------------|--------------|----------------------------------------|
| GO:0019200           | 1            | AT5G26570                              |
| GO:0031225           | 1            | AT3G60900                              |
| GO:0042732           | 1            | AT5G59290                              |
| GO:0046658           | 1            | AT3G60900                              |
| GO:0046777           | 1            | AT5G26570                              |
| GO:0048040           | 1            | AT5G59290                              |
| GO:0051752           | 1            | AT5G26570                              |

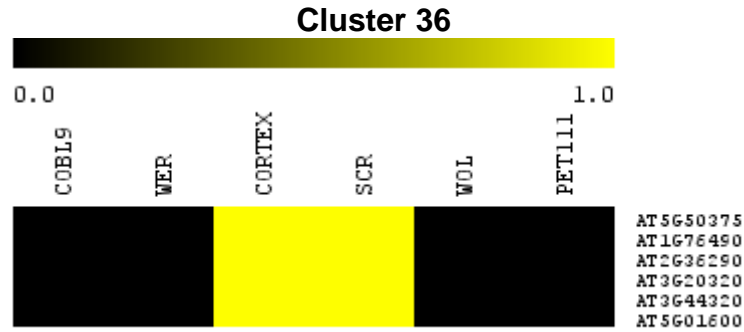

**Cluster 36**  
 AT1G76490  
 AT2G36290  
 AT3G20320  
 AT3G44320  
 AT5G01600  
 AT5G50375

| Cluster 36<br>GO identifier | Description                                  | #<br>Associated<br>to the GO<br>in Cluster | Total # in<br>Cluster | p-value     |
|-----------------------------|----------------------------------------------|--------------------------------------------|-----------------------|-------------|
| GO:0016126                  | sterol biosynthetic process                  | 2                                          | 6                     | 1.59E-05    |
| GO:0005783                  | endoplasmic reticulum                        | 3                                          | 6                     | 3.91E-05    |
| GO:0006907                  | pinocytosis                                  | 1                                          | 6                     | 2.88E-04    |
| GO:0047793                  | cycloeucalenol cycloisomerase activity       | 1                                          | 6                     | 2.88E-04    |
| GO:0042282                  | hydroxymethylglutaryl-CoA reductase activity | 1                                          | 6                     | 5.75E-04    |
| GO:0000257                  | nitrilase activity                           | 1                                          | 6                     | 8.63E-04    |
| GO:0005543                  | phospholipid binding                         | 1                                          | 6                     | 8.63E-04    |
| GO:0055072                  | iron ion homeostasis                         | 1                                          | 6                     | 8.63E-04    |
| GO:0008199                  | ferric iron binding                          | 1                                          | 6                     | 0.001149976 |
| GO:0019762                  | glucosinolate catabolic process              | 1                                          | 6                     | 0.001437125 |
| GO:0005319                  | lipid transporter activity                   | 1                                          | 6                     | 0.001724136 |
| GO:0009970                  | cellular response to sulfate starvation      | 1                                          | 6                     | 0.00201101  |
| GO:0000302                  | response to reactive oxygen species          | 1                                          | 6                     | 0.002584344 |
| GO:0006826                  | iron ion transport                           | 1                                          | 6                     | 0.002584344 |
| GO:0006879                  | cellular iron ion homeostasis                | 1                                          | 6                     | 0.002584344 |
| GO:0010039                  | response to iron ion                         | 1                                          | 6                     | 0.002584344 |
| GO:0009958                  | positive gravitropism                        | 1                                          | 6                     | 0.003443313 |
| GO:0016020                  | membrane                                     | 3                                          | 6                     | 0.004294585 |
| GO:0008299                  | isoprenoid biosynthetic process              | 1                                          | 6                     | 0.005442762 |
| GO:0000910                  | cytokinesis                                  | 1                                          | 6                     | 0.006012798 |
| GO:0005506                  | iron ion binding                             | 1                                          | 6                     | 0.007435487 |
| GO:0009706                  | chloroplast inner membrane                   | 1                                          | 6                     | 0.008854752 |
| GO:0042542                  | response to hydrogen peroxide                | 1                                          | 6                     | 0.009138194 |
| GO:0015979                  | photosynthesis                               | 1                                          | 6                     | 0.011683028 |
| GO:0009617                  | response to bacterium                        | 1                                          | 6                     | 0.015339405 |

|            |                                |   |   |             |
|------------|--------------------------------|---|---|-------------|
| GO:0009908 | flower development             | 1 | 6 | 0.020364192 |
| GO:0048366 | leaf development               | 1 | 6 | 0.021197393 |
| GO:0016787 | hydrolase activity             | 1 | 6 | 0.041367573 |
| GO:0009579 | thylakoid                      | 1 | 6 | 0.046959023 |
| GO:0009409 | response to cold               | 1 | 6 | 0.051705575 |
| GO:0009535 | chloroplast thylakoid membrane | 1 | 6 | 0.067222901 |
| GO:0046686 | response to cadmium ion        | 1 | 6 | 0.074807732 |
| GO:0009570 | chloroplast stroma             | 1 | 6 | 0.093512381 |
| GO:0009941 | chloroplast envelope           | 1 | 6 | 0.097358085 |
| GO:0009507 | chloroplast                    | 2 | 6 | 0.117237127 |

### Cluster 36

| <u>GO Identifier</u> | <u>#Loci</u> | <u>Associated Loci (Left to Right)</u> |           |           |
|----------------------|--------------|----------------------------------------|-----------|-----------|
| GO:0000257           | 1            | AT3G44320                              |           |           |
| GO:0000302           | 1            | AT5G01600                              |           |           |
| GO:0000910           | 1            | AT5G50375                              |           |           |
| GO:0005319           | 1            | AT3G20320                              |           |           |
| GO:0005506           | 1            | AT5G01600                              |           |           |
| GO:0005543           | 1            | AT3G20320                              |           |           |
| GO:0005783           | 3            | AT1G76490                              | AT2G36290 | AT5G50375 |
| GO:0006826           | 1            | AT5G01600                              |           |           |
| GO:0006879           | 1            | AT5G01600                              |           |           |
| GO:0006907           | 1            | AT5G50375                              |           |           |
| GO:0008199           | 1            | AT5G01600                              |           |           |
| GO:0008299           | 1            | AT1G76490                              |           |           |
| GO:0009409           | 1            | AT5G01600                              |           |           |
| GO:0009507           | 2            | AT3G20320                              | AT5G01600 |           |
| GO:0009535           | 1            | AT5G01600                              |           |           |
| GO:0009570           | 1            | AT5G01600                              |           |           |
| GO:0009579           | 1            | AT5G01600                              |           |           |
| GO:0009617           | 1            | AT5G01600                              |           |           |
| GO:0009706           | 1            | AT3G20320                              |           |           |
| GO:0009908           | 1            | AT5G01600                              |           |           |
| GO:0009941           | 1            | AT3G20320                              |           |           |
| GO:0009958           | 1            | AT5G50375                              |           |           |
| GO:0009970           | 1            | AT3G44320                              |           |           |
| GO:0010039           | 1            | AT5G01600                              |           |           |
| GO:0015979           | 1            | AT5G01600                              |           |           |
| GO:0016020           | 3            | AT1G76490                              | AT3G20320 | AT5G01600 |
| GO:0016126           | 2            | AT1G76490                              | AT5G50375 |           |
| GO:0016787           | 1            | AT2G36290                              |           |           |
| GO:0019762           | 1            | AT3G44320                              |           |           |
| GO:0042282           | 1            | AT1G76490                              |           |           |
| GO:0042542           | 1            | AT5G01600                              |           |           |
| GO:0046686           | 1            | AT3G44320                              |           |           |
| GO:0047793           | 1            | AT5G50375                              |           |           |
| GO:0048366           | 1            | AT5G01600                              |           |           |
| GO:0055072           | 1            | AT5G01600                              |           |           |

### Cluster 37

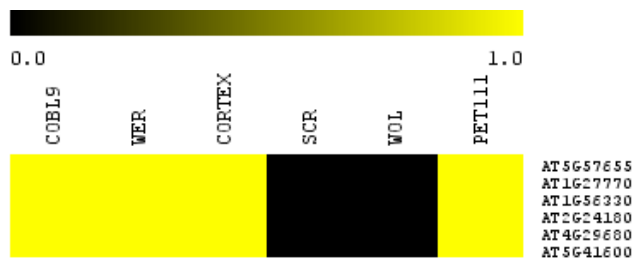

**Cluster 37**

AT1G27770  
 AT1G56330  
 AT2G24180  
 AT4G29680  
 AT5G41600  
 AT5G57655

| Cluster 37<br>GO identifier | Description                                      | #<br>Associated<br>to the GO<br>in Cluster | Total # in<br>Cluster | p-value     |
|-----------------------------|--------------------------------------------------|--------------------------------------------|-----------------------|-------------|
| GO:0005783                  | endoplasmic reticulum                            | 5                                          | 6                     | 1.89E-09    |
| GO:0005886                  | plasma membrane                                  | 5                                          | 6                     | 1.80E-05    |
| GO:0009045                  | xylose isomerase activity                        | 1                                          | 6                     | 2.88E-04    |
| GO:0048221                  | rough ER to cis-Golgi vesicle-mediated transport | 1                                          | 6                     | 2.88E-04    |
| GO:0000300                  | peripheral to membrane of membrane fraction      | 1                                          | 6                     | 5.75E-04    |
| GO:0005262                  | calcium channel activity                         | 1                                          | 6                     | 8.63E-04    |
| GO:0005388                  | calcium-transporting ATPase activity             | 1                                          | 6                     | 0.003729361 |
| GO:0006816                  | calcium ion transport                            | 1                                          | 6                     | 0.004015271 |
| GO:0009117                  | nucleotide metabolic process                     | 1                                          | 6                     | 0.004015271 |
| GO:0005773                  | vacuole                                          | 2                                          | 6                     | 0.006199877 |
| GO:0015992                  | proton transport                                 | 1                                          | 6                     | 0.007435487 |
| GO:0009706                  | chloroplast inner membrane                       | 1                                          | 6                     | 0.008854752 |
| GO:0006812                  | cation transport                                 | 1                                          | 6                     | 0.01869414  |
| GO:0016787                  | hydrolase activity                               | 1                                          | 6                     | 0.041367573 |
| GO:0005516                  | calmodulin binding                               | 1                                          | 6                     | 0.041635151 |
| GO:0005829                  | cytosol                                          | 1                                          | 6                     | 0.047488516 |
| GO:0005525                  | GTP binding                                      | 1                                          | 6                     | 0.04828177  |
| GO:0019825                  | oxygen binding                                   | 1                                          | 6                     | 0.052754607 |
| GO:0005975                  | carbohydrate metabolic process                   | 1                                          | 6                     | 0.079800598 |
| GO:0006810                  | transport                                        | 1                                          | 6                     | 0.084988653 |
| GO:0008152                  | metabolic process                                | 1                                          | 6                     | 0.140210956 |
| GO:0005739                  | mitochondrion                                    | 1                                          | 6                     | 0.183391785 |
| GO:0016020                  | membrane                                         | 1                                          | 6                     | 0.275969005 |

**Cluster 37**

**GO Identifier #Loci Associated Loci (Left to Right)**

|            |   |           |           |           |           |           |
|------------|---|-----------|-----------|-----------|-----------|-----------|
| GO:0000300 | 1 | AT1G56330 |           |           |           |           |
| GO:0005262 | 1 | AT1G27770 |           |           |           |           |
| GO:0005388 | 1 | AT1G27770 |           |           |           |           |
| GO:0005516 | 1 | AT1G27770 |           |           |           |           |
| GO:0005525 | 1 | AT1G56330 |           |           |           |           |
| GO:0005739 | 1 | AT2G24180 |           |           |           |           |
| GO:0005773 | 2 | AT4G29680 | AT5G57655 |           |           |           |
| GO:0005783 | 5 | AT1G27770 | AT1G56330 | AT2G24180 | AT5G41600 | AT5G57655 |
| GO:0005829 | 1 | AT1G56330 |           |           |           |           |
| GO:0005886 | 5 | AT1G27770 | AT1G56330 | AT2G24180 | AT5G41600 | AT5G57655 |
| GO:0005975 | 1 | AT5G57655 |           |           |           |           |
| GO:0006810 | 1 | AT1G27770 |           |           |           |           |
| GO:0006812 | 1 | AT1G27770 |           |           |           |           |
| GO:0006816 | 1 | AT1G27770 |           |           |           |           |
| GO:0008152 | 1 | AT1G27770 |           |           |           |           |
| GO:0009045 | 1 | AT5G57655 |           |           |           |           |
| GO:0009117 | 1 | AT4G29680 |           |           |           |           |
| GO:0009706 | 1 | AT1G27770 |           |           |           |           |
| GO:0015992 | 1 | AT1G27770 |           |           |           |           |
| GO:0016020 | 1 | AT2G24180 |           |           |           |           |

**Cluster 37 (con.)**

| <u>GO Identifier</u> | <u>#Loci</u> | <u>Associated Loci (Left to Right)</u> |
|----------------------|--------------|----------------------------------------|
| GO:0016787           | 1            | AT4G29680                              |
| GO:0019825           | 1            | AT2G24180                              |
| GO:0048221           | 1            | AT1G56330                              |

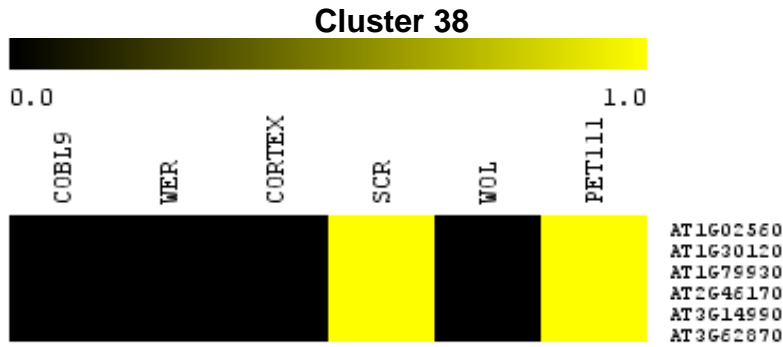

**Cluster 38**  
 AT1G02560  
 AT1G30120  
 AT1G79930  
 AT2G46170  
 AT3G14990  
 AT3G62870

| Cluster 38<br>GO identifier | Description                                           | #<br>Associated<br>to the GO<br>in Cluster | Total # in<br>Cluster | p-value     |
|-----------------------------|-------------------------------------------------------|--------------------------------------------|-----------------------|-------------|
| GO:0010240                  | plastid pyruvate dehydrogenase complex                | 1                                          | 6                     | 2.88E-04    |
| GO:0009228                  | thiamin biosynthetic process                          | 1                                          | 6                     | 0.001437125 |
| GO:0004739                  | pyruvate dehydrogenase (acetyl-transferring) activity | 1                                          | 6                     | 0.001724136 |
| GO:0009840                  | chloroplastic endopeptidase Clp complex               | 1                                          | 6                     | 0.00201101  |
| GO:0009534                  | chloroplast thylakoid                                 | 1                                          | 6                     | 0.003443313 |
| GO:0018119                  | peptidyl-cysteine S-nitrosylation                     | 1                                          | 6                     | 0.004015271 |
| GO:0009941                  | chloroplast envelope                                  | 2                                          | 6                     | 0.004385178 |
| GO:0009532                  | plastid stroma                                        | 1                                          | 6                     | 0.00458668  |
| GO:0005886                  | plasma membrane                                       | 3                                          | 6                     | 0.007971767 |
| GO:0006633                  | fatty acid biosynthetic process                       | 1                                          | 6                     | 0.013373445 |
| GO:0022625                  | cytosolic large ribosomal subunit                     | 1                                          | 6                     | 0.028093568 |
| GO:0022626                  | cytosolic ribosome                                    | 1                                          | 6                     | 0.0461638   |
| GO:0009579                  | thylakoid                                             | 1                                          | 6                     | 0.046959023 |
| GO:0005783                  | endoplasmic reticulum                                 | 1                                          | 6                     | 0.071535093 |
| GO:0046686                  | response to cadmium ion                               | 1                                          | 6                     | 0.074807732 |
| GO:0003735                  | structural constituent of ribosome                    | 1                                          | 6                     | 0.076310923 |
| GO:0006412                  | translation                                           | 1                                          | 6                     | 0.079303593 |
| GO:0009570                  | chloroplast stroma                                    | 1                                          | 6                     | 0.093512381 |
| GO:0003824                  | catalytic activity                                    | 1                                          | 6                     | 0.097358085 |
| GO:0005773                  | vacuole                                               | 1                                          | 6                     | 0.114504149 |
| GO:0009507                  | chloroplast                                           | 2                                          | 6                     | 0.117237127 |
| GO:0016020                  | membrane                                              | 1                                          | 6                     | 0.275969005 |

**Cluster 38**

| <u>GO Identifier</u> | <u>#Loci</u> | <u>Associated Loci (Left to Right)</u> |
|----------------------|--------------|----------------------------------------|
| GO:0003735           | 1            | AT3G62870                              |
| GO:0003824           | 1            | AT3G14990                              |
| GO:0004739           | 1            | AT1G30120                              |
| GO:0005773           | 1            | AT3G14990                              |

**Cluster 38 (con.)**

| <b>GO Identifier</b> | <b>#Loci</b> | <b>Associated Loci (Left to Right)</b> |           |           |
|----------------------|--------------|----------------------------------------|-----------|-----------|
| GO:0005783           | 1            | AT2G46170                              |           |           |
| GO:0005886           | 3            | AT2G46170                              | AT3G14990 | AT3G62870 |
| GO:0006412           | 1            | AT3G62870                              |           |           |
| GO:0006633           | 1            | AT1G30120                              |           |           |
| GO:0009228           | 1            | AT3G14990                              |           |           |
| GO:0009507           | 2            | AT1G02560                              | AT1G30120 |           |
| GO:0009532           | 1            | AT1G02560                              |           |           |
| GO:0009534           | 1            | AT1G02560                              |           |           |
| GO:0009570           | 1            | AT1G02560                              |           |           |
| GO:0009579           | 1            | AT1G02560                              |           |           |
| GO:0009840           | 1            | AT1G02560                              |           |           |
| GO:0009941           | 2            | AT1G02560                              | AT1G30120 |           |
| GO:0010240           | 1            | AT1G30120                              |           |           |
| GO:0016020           | 1            | AT3G62870                              |           |           |
| GO:0018119           | 1            | AT1G02560                              |           |           |
| GO:0022625           | 1            | AT3G62870                              |           |           |
| GO:0022626           | 1            | AT3G62870                              |           |           |
| GO:0046686           | 1            | AT3G14990                              |           |           |

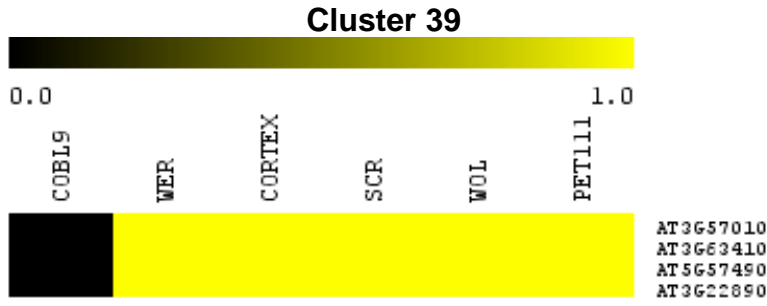

**Cluster 39**  
 AT3G22890  
 AT3G57010  
 AT3G63410  
 AT5G57490

| Cluster 39<br>GO identifier | Description                                                   | #<br>Associated<br>to the GO<br>in Cluster | Total # in<br>Cluster | p-value     |
|-----------------------------|---------------------------------------------------------------|--------------------------------------------|-----------------------|-------------|
| GO:0051741                  | 2-methyl-6-phytyl-1,4-benzoquinone methyltransferase activity | 1                                          | 4                     | 1.92E-04    |
| GO:0004781                  | sulfate adenylyltransferase (ATP) activity                    | 1                                          | 4                     | 7.67E-04    |
| GO:0010236                  | plastoquinone biosynthetic process                            | 1                                          | 4                     | 7.67E-04    |
| GO:0010189                  | vitamin E biosynthetic process                                | 1                                          | 4                     | 0.001341445 |
| GO:0008308                  | voltage-gated anion channel activity                          | 1                                          | 4                     | 0.00153286  |
| GO:0009821                  | alkaloid biosynthetic process                                 | 1                                          | 4                     | 0.002297966 |
| GO:0016844                  | strictosidine synthase activity                               | 1                                          | 4                     | 0.002680189 |
| GO:0005741                  | mitochondrial outer membrane                                  | 1                                          | 4                     | 0.003253109 |
| GO:0006820                  | anion transport                                               | 1                                          | 4                     | 0.003253109 |
| GO:0008757                  | S-adenosylmethionine-dependent methyltransferase activity     | 1                                          | 4                     | 0.003825535 |
| GO:0009706                  | chloroplast inner membrane                                    | 1                                          | 4                     | 0.005920192 |
| GO:0008168                  | methyltransferase activity                                    | 1                                          | 4                     | 0.008765829 |
| GO:0009617                  | response to bacterium                                         | 1                                          | 4                     | 0.010278457 |
| GO:0005886                  | plasma membrane                                               | 2                                          | 4                     | 0.032511279 |
| GO:0005783                  | endoplasmic reticulum                                         | 1                                          | 4                     | 0.048921054 |
| GO:0046686                  | response to cadmium ion                                       | 1                                          | 4                     | 0.051223803 |



| Cluster 39<br>GO identifier<br>(con.) | Description          | #<br>Associated<br>to the GO<br>in Cluster | Total # in<br>Cluster | p-value     |
|---------------------------------------|----------------------|--------------------------------------------|-----------------------|-------------|
| GO:0009507                            | chloroplast          | 2                                          | 4                     | 0.059481381 |
| GO:0009570                            | chloroplast stroma   | 1                                          | 4                     | 0.064507322 |
| GO:0009941                            | chloroplast envelope | 1                                          | 4                     | 0.067265162 |
| GO:0005739                            | mitochondrion        | 1                                          | 4                     | 0.131791079 |
| GO:0016020                            | membrane             | 1                                          | 4                     | 0.209989764 |

### Cluster 39

#### GO Identifier #Loci Associated Loci (Left to Right)

|            |   |           |           |
|------------|---|-----------|-----------|
| GO:0004781 | 1 | AT3G22890 |           |
| GO:0005739 | 1 | AT5G57490 |           |
| GO:0005741 | 1 | AT5G57490 |           |
| GO:0005783 | 1 | AT3G57010 |           |
| GO:0005886 | 2 | AT3G22890 | AT5G57490 |
| GO:0006820 | 1 | AT5G57490 |           |
| GO:0008168 | 1 | AT3G63410 |           |
| GO:0008308 | 1 | AT5G57490 |           |
| GO:0008757 | 1 | AT3G63410 |           |
| GO:0009507 | 2 | AT3G22890 | AT3G63410 |
| GO:0009570 | 1 | AT3G22890 |           |
| GO:0009617 | 1 | AT5G57490 |           |
| GO:0009706 | 1 | AT3G63410 |           |
| GO:0009821 | 1 | AT3G57010 |           |
| GO:0009941 | 1 | AT3G63410 |           |
| GO:0010189 | 1 | AT3G63410 |           |
| GO:0010236 | 1 | AT3G63410 |           |
| GO:0016020 | 1 | AT5G57490 |           |
| GO:0016844 | 1 | AT3G57010 |           |
| GO:0046686 | 1 | AT3G22890 |           |
| GO:0051741 | 1 | AT3G63410 |           |

### Cluster 40

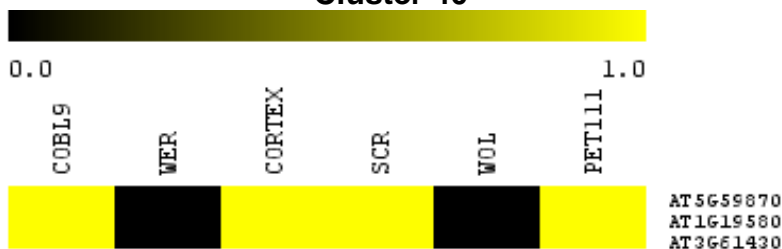

### Cluster 40

AT1G19580  
AT3G61430  
AT5G59870

| Cluster 40<br>GO identifier | Description                    | #<br>Associated<br>to the GO<br>in Cluster | Total # in<br>Cluster | p-value     |
|-----------------------------|--------------------------------|--------------------------------------------|-----------------------|-------------|
| GO:0006833                  | water transport                | 1                                          | 3                     | 5.75E-04    |
| GO:0004089                  | carbonate dehydratase activity | 1                                          | 3                     | 0.00215486  |
| GO:0031966                  | mitochondrial membrane         | 1                                          | 3                     | 0.002728441 |
| GO:0005739                  | mitochondrion                  | 2                                          | 3                     | 0.003924047 |

| Cluster 40<br>GO identifier<br>(con.) | Description                   | #<br>Associated<br>to the GO<br>in Cluster | Total # in<br>Cluster | p-value     |
|---------------------------------------|-------------------------------|--------------------------------------------|-----------------------|-------------|
| GO:0015250                            | water channel activity        | 1                                          | 3                     | 0.004017388 |
| GO:0009853                            | photorespiration              | 1                                          | 3                     | 0.004160466 |
| GO:0045271                            | respiratory chain complex I   | 1                                          | 3                     | 0.005304104 |
| GO:0006334                            | nucleosome assembly           | 1                                          | 3                     | 0.007158759 |
| GO:0009414                            | response to water deprivation | 1                                          | 3                     | 0.019311174 |
| GO:0005730                            | nucleolus                     | 1                                          | 3                     | 0.033462623 |
| GO:0009651                            | response to salt stress       | 1                                          | 3                     | 0.040432401 |
| GO:0006810                            | transport                     | 1                                          | 3                     | 0.044499424 |
| GO:0009941                            | chloroplast envelope          | 1                                          | 3                     | 0.051357705 |
| GO:0005773                            | vacuole                       | 1                                          | 3                     | 0.061052959 |
| GO:0003677                            | DNA binding                   | 1                                          | 3                     | 0.140273055 |
| GO:0016020                            | membrane                      | 1                                          | 3                     | 0.168256477 |
| GO:0005886                            | plasma membrane               | 1                                          | 3                     | 0.203214985 |

### Cluster 40

#### GO Identifier #Loci Associated Loci (Left to Right)

|            |   |                     |  |
|------------|---|---------------------|--|
| GO:0003677 | 1 | AT5G59870           |  |
| GO:0004089 | 1 | AT1G19580           |  |
| GO:0005730 | 1 | AT5G59870           |  |
| GO:0005739 | 2 | AT1G19580 AT3G61430 |  |
| GO:0005773 | 1 | AT3G61430           |  |
| GO:0005886 | 1 | AT3G61430           |  |
| GO:0006334 | 1 | AT5G59870           |  |
| GO:0006810 | 1 | AT3G61430           |  |
| GO:0006833 | 1 | AT3G61430           |  |
| GO:0009414 | 1 | AT3G61430           |  |
| GO:0009651 | 1 | AT3G61430           |  |
| GO:0009853 | 1 | AT1G19580           |  |
| GO:0009941 | 1 | AT3G61430           |  |
| GO:0015250 | 1 | AT3G61430           |  |
| GO:0016020 | 1 | AT3G61430           |  |
| GO:0031966 | 1 | AT1G19580           |  |
| GO:0045271 | 1 | AT1G19580           |  |

### Cluster 41

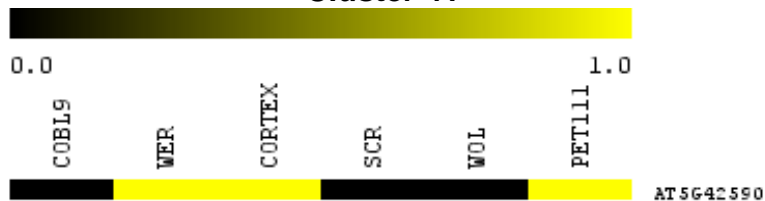

### Cluster 41 AT5G42590

| Cluster 41<br>GO identifier | Description    | #<br>Associated<br>to the GO<br>in Cluster | Total # in<br>Cluster | p-value     |
|-----------------------------|----------------|--------------------------------------------|-----------------------|-------------|
| GO:0019825                  | oxygen binding | 1                                          | 1                     | 0.009206425 |
| GO:0009507                  | chloroplast    | 1                                          | 1                     | 0.112155358 |

**Cluster 41**

**GO Identifier #Loci Associated Loci (Left to Right)**

GO:0009507 1 AT5G42590  
GO:0019825 1 AT5G42590

**Cluster 42**

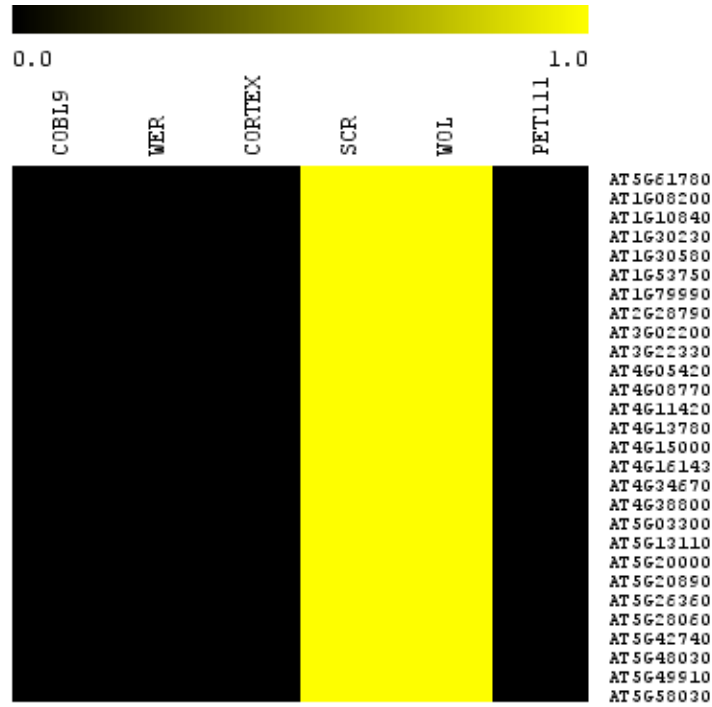

**Cluster 42**

AT1G08200  
AT1G10840  
AT1G30230  
AT1G30580  
AT1G53750  
AT1G79990  
AT2G28790  
AT3G02200  
AT3G22330  
AT4G05420  
AT4G08770  
AT4G11420  
AT4G13780  
AT4G15000  
AT4G16143  
AT4G34670  
AT4G38800  
AT5G03300  
AT5G13110  
AT5G20000  
AT5G20890  
AT5G26360  
AT5G28060  
AT5G42740  
AT5G48030  
AT5G49910  
AT5G58030  
AT5G61780

| Cluster 42<br>GO identifier | Description                                           | #<br>Associated<br>to the GO<br>in Cluster | Total # in<br>Cluster | p-value     |
|-----------------------------|-------------------------------------------------------|--------------------------------------------|-----------------------|-------------|
| GO:0051082                  | unfolded protein binding                              | 4                                          | 28                    | 9.12E-06    |
| GO:0046686                  | response to cadmium ion                               | 5                                          | 28                    | 2.95E-05    |
| GO:0005852                  | eukaryotic translation initiation factor 3 complex    | 2                                          | 28                    | 6.20E-05    |
| GO:0044267                  | cellular protein metabolic process                    | 2                                          | 28                    | 9.45E-05    |
| GO:0006457                  | protein folding                                       | 4                                          | 28                    | 1.44E-04    |
| GO:0000740                  | nuclear membrane fusion                               | 1                                          | 28                    | 0.001342604 |
| GO:0004825                  | methionine-tRNA ligase activity                       | 1                                          | 28                    | 0.001342604 |
| GO:0006431                  | methionyl-tRNA aminoacylation                         | 1                                          | 28                    | 0.001342604 |
| GO:0010198                  | synergid death                                        | 1                                          | 28                    | 0.001342604 |
| GO:0016442                  | RNA-induced silencing complex                         | 1                                          | 28                    | 0.001342604 |
| GO:0022626                  | cytosolic ribosome                                    | 3                                          | 28                    | 0.00135614  |
| GO:0006413                  | translational initiation                              | 2                                          | 28                    | 0.002415995 |
| GO:0004001                  | adenosine kinase activity                             | 1                                          | 28                    | 0.002681731 |
| GO:0004347                  | glucose-6-phosphate isomerase activity                | 1                                          | 28                    | 0.002681731 |
| GO:0006169                  | adenosine salvage                                     | 1                                          | 28                    | 0.002681731 |
| GO:0008930                  | methylthioadenosine nucleosidase activity             | 1                                          | 28                    | 0.002681731 |
| GO:0051085                  | chaperone mediated protein folding requiring cofactor | 1                                          | 28                    | 0.002681731 |
| GO:0003743                  | translation initiation factor activity                | 2                                          | 28                    | 0.003855989 |
| GO:0008565                  | protein transporter activity                          | 2                                          | 28                    | 0.003962794 |
| GO:0009558                  | cellularization of the embryo sac                     | 1                                          | 28                    | 0.004017388 |
| GO:0022627                  | cytosolic small ribosomal subunit                     | 2                                          | 28                    | 0.004982744 |
| GO:0003735                  | structural constituent of ribosome                    | 3                                          | 28                    | 0.005830912 |
| GO:0006412                  | translation                                           | 3                                          | 28                    | 0.006508853 |
| GO:0005618                  | cell wall                                             | 3                                          | 28                    | 0.006924046 |
| GO:0004345                  | glucose-6-phosphate dehydrogenase activity            | 1                                          | 28                    | 0.008003603 |
| GO:0006006                  | glucose metabolic process                             | 1                                          | 28                    | 0.008003603 |
| GO:0009116                  | nucleoside metabolic process                          | 1                                          | 28                    | 0.008003603 |
| GO:0030126                  | COPI vesicle coat                                     | 1                                          | 28                    | 0.008003603 |
| GO:0006886                  | intracellular protein transport                       | 2                                          | 28                    | 0.010053373 |
| GO:0006606                  | protein import into nucleus                           | 1                                          | 28                    | 0.010643849 |
| GO:0009051                  | pentose-phosphate shunt, oxidative branch             | 1                                          | 28                    | 0.010643849 |
| GO:0006094                  | gluconeogenesis                                       | 1                                          | 28                    | 0.011958821 |
| GO:0010100                  | negative regulation of photomorphogenesis             | 1                                          | 28                    | 0.011958821 |
| GO:0010197                  | polar nucleus fusion                                  | 1                                          | 28                    | 0.014578498 |
| GO:0009532                  | plastid stroma                                        | 1                                          | 28                    | 0.021068092 |
| GO:0005840                  | ribosome                                              | 2                                          | 28                    | 0.023297968 |
| GO:0006888                  | ER to Golgi vesicle-mediated transport                | 1                                          | 28                    | 0.023640224 |
| GO:0004518                  | nuclease activity                                     | 1                                          | 28                    | 0.030011734 |
| GO:0006461                  | protein complex assembly                              | 1                                          | 28                    | 0.030011734 |
| GO:0009553                  | embryo sac development                                | 1                                          | 28                    | 0.035048857 |
| GO:0016481                  | negative regulation of transcription                  | 1                                          | 28                    | 0.035048857 |
| GO:0005730                  | nucleolus                                             | 2                                          | 28                    | 0.03646029  |
| GO:0005524                  | ATP binding                                           | 3                                          | 28                    | 0.041147205 |
| GO:0005198                  | structural molecule activity                          | 1                                          | 28                    | 0.052264226 |
| GO:0005515                  | protein binding                                       | 4                                          | 28                    | 0.05407758  |
| GO:0006096                  | glycolysis                                            | 1                                          | 28                    | 0.05467158  |
| GO:0051707                  | response to other organism                            | 1                                          | 28                    | 0.061816742 |
| GO:0046658                  | anchored to plasma membrane                           | 1                                          | 28                    | 0.074620186 |
| GO:0005622                  | intracellular                                         | 2                                          | 28                    | 0.080578756 |
| GO:0004601                  | peroxidase activity                                   | 1                                          | 28                    | 0.081444753 |
| GO:0016192                  | vesicle-mediated transport                            | 1                                          | 28                    | 0.092573656 |
| GO:0042254                  | ribosome biogenesis                                   | 1                                          | 28                    | 0.11080349  |
| GO:0009408                  | response to heat                                      | 1                                          | 28                    | 0.111849281 |

| Cluster 42<br>GO identifier<br>(con.) | Description                       | #<br>Associated<br>to the GO<br>in Cluster | Total # in<br>Cluster | p-value     |
|---------------------------------------|-----------------------------------|--------------------------------------------|-----------------------|-------------|
| GO:0005886                            | plasma membrane                   | 4                                          | 28                    | 0.113462681 |
| GO:0022625                            | cytosolic large ribosomal subunit | 1                                          | 28                    | 0.118063021 |
| GO:0005507                            | copper ion binding                | 1                                          | 28                    | 0.124173042 |
| GO:0031072                            | heat shock protein binding        | 1                                          | 28                    | 0.125181379 |
| GO:0009579                            | thylakoid                         | 1                                          | 28                    | 0.183199042 |
| GO:0005829                            | cytosol                           | 1                                          | 28                    | 0.184870745 |
| GO:0005525                            | GTP binding                       | 1                                          | 28                    | 0.187359531 |
| GO:0006979                            | response to oxidative stress      | 1                                          | 28                    | 0.201043305 |
| GO:0009505                            | plant-type cell wall              | 1                                          | 28                    | 0.234647235 |
| GO:0048046                            | apoplast                          | 1                                          | 28                    | 0.236672648 |
| GO:0016020                            | membrane                          | 2                                          | 28                    | 0.277561831 |
| GO:0003676                            | nucleic acid binding              | 1                                          | 28                    | 0.290769747 |
| GO:0009570                            | chloroplast stroma                | 1                                          | 28                    | 0.299666635 |
| GO:0003824                            | catalytic activity                | 1                                          | 28                    | 0.30667329  |
| GO:0009941                            | chloroplast envelope              | 1                                          | 28                    | 0.30667329  |
| GO:0005773                            | vacuole                           | 1                                          | 28                    | 0.333418954 |

#### Cluster 42

| GO Identifier | #Loci | Associated Loci (Left to Right)         |
|---------------|-------|-----------------------------------------|
| GO:0000740    | 1     | AT5G48030                               |
| GO:0003676    | 1     | AT5G61780                               |
| GO:0003735    | 3     | AT4G15000 AT4G34670 AT5G28060           |
| GO:0003743    | 2     | AT1G10840 AT4G11420                     |
| GO:0003824    | 1     | AT4G38800                               |
| GO:0004001    | 1     | AT5G03300                               |
| GO:0004345    | 1     | AT5G13110                               |
| GO:0004347    | 1     | AT5G42740                               |
| GO:0004518    | 1     | AT5G61780                               |
| GO:0004601    | 1     | AT4G08770                               |
| GO:0004825    | 1     | AT4G13780                               |
| GO:0005198    | 1     | AT1G79990                               |
| GO:0005507    | 1     | AT5G03300                               |
| GO:0005515    | 4     | AT1G79990 AT4G05420 AT5G20890 AT5G26360 |
| GO:0005524    | 3     | AT5G20890 AT5G26360 AT5G49910           |
| GO:0005525    | 1     | AT1G30580                               |
| GO:0005618    | 3     | AT4G34670 AT5G20890 AT5G28060           |
| GO:0005622    | 2     | AT1G30580 AT4G15000                     |
| GO:0005730    | 2     | AT4G16143 AT4G34670                     |
| GO:0005773    | 1     | AT4G08770                               |
| GO:0005829    | 1     | AT4G13780                               |
| GO:0005840    | 2     | AT4G15000 AT5G28060                     |
| GO:0005852    | 2     | AT1G10840 AT4G11420                     |
| GO:0005886    | 4     | AT4G11420 AT4G34670 AT4G38800 AT5G03300 |
| GO:0006006    | 1     | AT5G13110                               |
| GO:0006094    | 1     | AT5G42740                               |
| GO:0006096    | 1     | AT5G42740                               |
| GO:0006169    | 1     | AT5G03300                               |
| GO:0006412    | 3     | AT4G15000 AT4G34670 AT5G28060           |
| GO:0006413    | 2     | AT1G10840 AT4G11420                     |
| GO:0006431    | 1     | AT4G13780                               |
| GO:0006457    | 4     | AT5G20890 AT5G26360 AT5G48030 AT5G49910 |
| GO:0006461    | 1     | AT1G79990                               |
| GO:0006606    | 1     | AT4G16143                               |
| GO:0006886    | 2     | AT1G79990 AT4G16143                     |
| GO:0006888    | 1     | AT5G58030                               |

**Cluster 42 (con.)**

| <u>GO Identifier</u> | <u>#Loci</u> | <u>Associated Loci (Left to Right)</u> |           |           |           |           |
|----------------------|--------------|----------------------------------------|-----------|-----------|-----------|-----------|
| GO:0006979           | 1            | AT4G08770                              |           |           |           |           |
| GO:0008565           | 2            | AT1G79990                              | AT4G16143 |           |           |           |
| GO:0008930           | 1            | AT4G38800                              |           |           |           |           |
| GO:0009051           | 1            | AT5G13110                              |           |           |           |           |
| GO:0009116           | 1            | AT4G38800                              |           |           |           |           |
| GO:0009408           | 1            | AT5G49910                              |           |           |           |           |
| GO:0009505           | 1            | AT2G28790                              |           |           |           |           |
| GO:0009532           | 1            | AT5G49910                              |           |           |           |           |
| GO:0009553           | 1            | AT5G48030                              |           |           |           |           |
| GO:0009558           | 1            | AT5G48030                              |           |           |           |           |
| GO:0009570           | 1            | AT5G49910                              |           |           |           |           |
| GO:0009579           | 1            | AT5G49910                              |           |           |           |           |
| GO:0009941           | 1            | AT5G49910                              |           |           |           |           |
| GO:0010100           | 1            | AT4G05420                              |           |           |           |           |
| GO:0010197           | 1            | AT5G48030                              |           |           |           |           |
| GO:0010198           | 1            | AT5G48030                              |           |           |           |           |
| GO:0016020           | 2            | AT4G34670                              | AT5G28060 |           |           |           |
| GO:0016192           | 1            | AT1G79990                              |           |           |           |           |
| GO:0016442           | 1            | AT5G61780                              |           |           |           |           |
| GO:0016481           | 1            | AT4G05420                              |           |           |           |           |
| GO:0022625           | 1            | AT4G15000                              |           |           |           |           |
| GO:0022626           | 3            | AT4G15000                              | AT4G34670 | AT5G28060 |           |           |
| GO:0022627           | 2            | AT4G34670                              | AT5G28060 |           |           |           |
| GO:0030126           | 1            | AT1G79990                              |           |           |           |           |
| GO:0031072           | 1            | AT5G48030                              |           |           |           |           |
| GO:0042254           | 1            | AT5G28060                              |           |           |           |           |
| GO:0044267           | 2            | AT5G20890                              | AT5G26360 |           |           |           |
| GO:0046658           | 1            | AT5G20890                              |           |           |           |           |
| GO:0046686           | 5            | AT1G30580                              | AT4G13780 | AT5G42740 | AT5G49910 | AT5G61780 |
| GO:0048046           | 1            | AT5G49910                              |           |           |           |           |
| GO:0051082           | 4            | AT5G20890                              | AT5G26360 | AT5G48030 | AT5G49910 |           |
| GO:0051085           | 1            | AT5G48030                              |           |           |           |           |
| GO:0051707           | 1            | AT2G28790                              |           |           |           |           |

**Cluster 43**

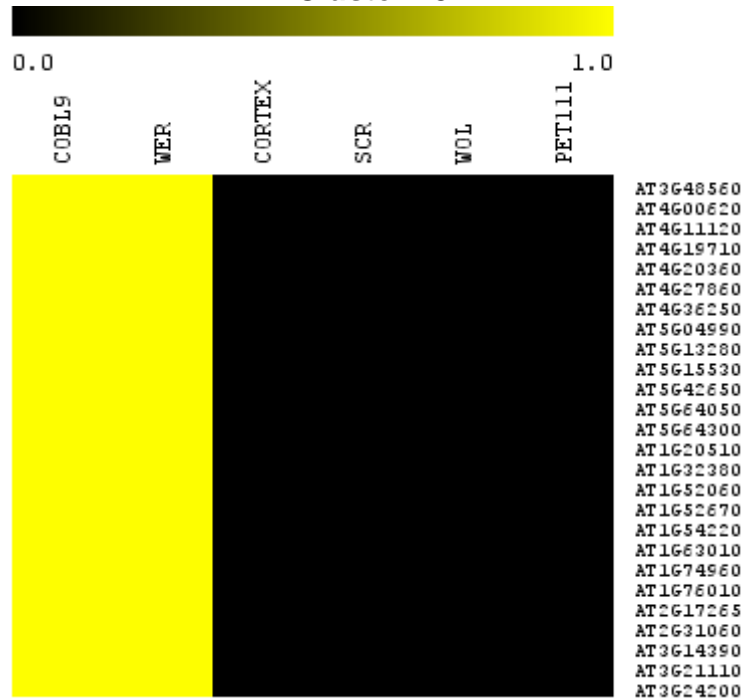

**Cluster 43**

AT1G20510  
 AT1G32380  
 AT1G52060  
 AT1G52670  
 AT1G54220  
 AT1G63010  
 AT1G74960  
 AT1G76010  
 AT2G17265  
 AT2G31060  
 AT3G14390  
 AT3G21110  
 AT3G24200  
 AT3G48560  
 AT4G00620  
 AT4G11120  
 AT4G19710  
 AT4G20360  
 AT4G27860  
 AT4G36250  
 AT5G04990  
 AT5G13280  
 AT5G15530  
 AT5G42650  
 AT5G64050  
 AT5G64300

| Cluster 43<br>GO identifier | Description                                                      | #<br>Associated<br>to the GO<br>in Cluster | Total # in<br>Cluster | p-value     |
|-----------------------------|------------------------------------------------------------------|--------------------------------------------|-----------------------|-------------|
| GO:0003746                  | translation elongation factor activity                           | 3                                          | 26                    | 9.50E-07    |
| GO:0004072                  | aspartate kinase activity                                        | 2                                          | 26                    | 4.48E-06    |
| GO:0009507                  | chloroplast                                                      | 12                                         | 26                    | 7.11E-06    |
| GO:0009695                  | jasmonic acid biosynthetic process                               | 2                                          | 26                    | 2.24E-04    |
| GO:0004413                  | homoserine kinase activity                                       | 1                                          | 26                    | 0.001246703 |
| GO:0004639                  | phosphoribosylaminoimidazolesuccinocarboxamide synthase activity | 1                                          | 26                    | 0.001246703 |
| GO:0006081                  | cellular aldehyde metabolic process                              | 1                                          | 26                    | 0.001246703 |
| GO:0009978                  | allene oxide synthase activity                                   | 1                                          | 26                    | 0.001246703 |
| GO:0019373                  | epoxygenase P450 pathway                                         | 1                                          | 26                    | 0.001246703 |
| GO:0031407                  | oxylipin metabolic process                                       | 1                                          | 26                    | 0.001246703 |
| GO:0006633                  | fatty acid biosynthetic process                                  | 2                                          | 26                    | 0.001533946 |
| GO:0004315                  | 3-oxoacyl-[acyl-carrier-protein] synthase activity               | 1                                          | 26                    | 0.002490418 |
| GO:0004818                  | glutamate-tRNA ligase activity                                   | 1                                          | 26                    | 0.002490418 |
| GO:0009374                  | biotin binding                                                   | 1                                          | 26                    | 0.002490418 |
| GO:0043039                  | tRNA aminoacylation                                              | 1                                          | 26                    | 0.002490418 |
| GO:0003935                  | GTP cyclohydrolase II activity                                   | 1                                          | 26                    | 0.003731148 |
| GO:0003984                  | acetolactate synthase activity                                   | 1                                          | 26                    | 0.003731148 |
| GO:0004312                  | fatty-acid synthase activity                                     | 1                                          | 26                    | 0.003731148 |
| GO:0004412                  | homoserine dehydrogenase activity                                | 1                                          | 26                    | 0.003731148 |
| GO:0006090                  | pyruvate metabolic process                                       | 1                                          | 26                    | 0.003731148 |
| GO:0008686                  | 3,4-dihydroxy-2-butanone-4-phosphate synthase activity           | 1                                          | 26                    | 0.003731148 |

| Cluster 43<br>GO identifier<br>(con.) | Description                                            | #<br>Associated<br>to the GO<br>in Cluster | Total # in<br>Cluster | p-value     |
|---------------------------------------|--------------------------------------------------------|--------------------------------------------|-----------------------|-------------|
| GO:0009067                            | aspartate family amino acid biosynthetic process       | 1                                          | 26                    | 0.003731148 |
| GO:0009088                            | threonine biosynthetic process                         | 1                                          | 26                    | 0.003731148 |
| GO:0004737                            | pyruvate decarboxylase activity                        | 1                                          | 26                    | 0.0049689   |
| GO:0006725                            | cellular aromatic compound metabolic process           | 1                                          | 26                    | 0.0049689   |
| GO:0004742                            | dihydrolipoyllysine-residue acetyltransferase activity | 1                                          | 26                    | 0.006203677 |
| GO:0006086                            | acetyl-CoA biosynthetic process from pyruvate          | 1                                          | 26                    | 0.006203677 |
| GO:0006424                            | glutamyl-tRNA aminoacylation                           | 1                                          | 26                    | 0.006203677 |
| GO:0006636                            | unsaturated fatty acid biosynthetic process            | 1                                          | 26                    | 0.006203677 |
| GO:0008652                            | amino acid biosynthetic process                        | 1                                          | 26                    | 0.006203677 |
| GO:0009082                            | branched chain family amino acid biosynthetic process  | 1                                          | 26                    | 0.006203677 |
| GO:0016836                            | hydro-lyase activity                                   | 1                                          | 26                    | 0.006203677 |
| GO:0004029                            | aldehyde dehydrogenase (NAD) activity                  | 1                                          | 26                    | 0.007435487 |
| GO:0006164                            | purine nucleotide biosynthetic process                 | 1                                          | 26                    | 0.007435487 |
| GO:0006744                            | ubiquinone biosynthetic process                        | 1                                          | 26                    | 0.007435487 |
| GO:0009086                            | methionine biosynthetic process                        | 1                                          | 26                    | 0.007435487 |
| GO:0009611                            | response to wounding                                   | 2                                          | 26                    | 0.007508082 |
| GO:0007005                            | mitochondrion organization                             | 1                                          | 26                    | 0.008664333 |
| GO:0005739                            | mitochondrion                                          | 4                                          | 26                    | 0.012048091 |
| GO:0009231                            | riboflavin biosynthetic process                        | 1                                          | 26                    | 0.012333141 |
| GO:0009698                            | phenylpropanoid metabolic process                      | 1                                          | 26                    | 0.013550185 |
| GO:0016207                            | 4-coumarate-CoA ligase activity                        | 1                                          | 26                    | 0.015975463 |
| GO:0004028                            | 3-chloroallyl aldehyde dehydrogenase activity          | 1                                          | 26                    | 0.017183709 |
| GO:0018119                            | peptidyl-cysteine S-nitrosylation                      | 1                                          | 26                    | 0.017183709 |
| GO:0008152                            | metabolic process                                      | 3                                          | 26                    | 0.026629337 |
| GO:0006414                            | translational elongation                               | 1                                          | 26                    | 0.02674488  |
| GO:0009295                            | nucleoid                                               | 1                                          | 26                    | 0.030282622 |
| GO:0048481                            | ovule development                                      | 1                                          | 26                    | 0.032626772 |
| GO:0000325                            | plant-type vacuole                                     | 1                                          | 26                    | 0.033794558 |
| GO:0009620                            | response to fungus                                     | 1                                          | 26                    | 0.033794558 |
| GO:0009535                            | chloroplast thylakoid membrane                         | 2                                          | 26                    | 0.034424943 |
| GO:0009658                            | chloroplast organization                               | 1                                          | 26                    | 0.043034577 |
| GO:0004497                            | monooxygenase activity                                 | 1                                          | 26                    | 0.046453035 |
| GO:0005774                            | vacuolar membrane                                      | 1                                          | 26                    | 0.047586918 |
| GO:0010287                            | plastoglobule                                          | 1                                          | 26                    | 0.056557827 |
| GO:0016020                            | membrane                                               | 4                                          | 26                    | 0.05852385  |
| GO:0009570                            | chloroplast stroma                                     | 2                                          | 26                    | 0.062046752 |
| GO:0009941                            | chloroplast envelope                                   | 2                                          | 26                    | 0.066531413 |
| GO:0005777                            | peroxisome                                             | 1                                          | 26                    | 0.121235928 |
| GO:0009753                            | response to jasmonic acid stimulus                     | 1                                          | 26                    | 0.123123047 |
| GO:0009536                            | plastid                                                | 1                                          | 26                    | 0.138770399 |
| GO:0009579                            | thylakoid                                              | 1                                          | 26                    | 0.172907922 |
| GO:0005525                            | GTP binding                                            | 1                                          | 26                    | 0.176920323 |
| GO:0019825                            | oxygen binding                                         | 1                                          | 26                    | 0.190154562 |
| GO:0009733                            | response to auxin stimulus                             | 1                                          | 26                    | 0.212018804 |
| GO:0005730                            | nucleolus                                              | 1                                          | 26                    | 0.222931161 |
| GO:0048046                            | apoplast                                               | 1                                          | 26                    | 0.224920978 |
| GO:0016021                            | integral to membrane                                   | 1                                          | 26                    | 0.231427684 |
| GO:0005783                            | endoplasmic reticulum                                  | 1                                          | 26                    | 0.240216754 |
| GO:0006952                            | defense response                                       | 1                                          | 26                    | 0.274373653 |
| GO:0003676                            | nucleic acid binding                                   | 1                                          | 26                    | 0.278872615 |
| GO:0005622                            | intracellular                                          | 1                                          | 26                    | 0.303168609 |
| GO:0005488                            | binding                                                | 1                                          | 26                    | 0.323173877 |



**Cluster 43**

| <b>GO Identifier</b> | <b>#Loci</b> | <b>Associated Loci (Left to Right)</b> |           |           |           |           |           |  |
|----------------------|--------------|----------------------------------------|-----------|-----------|-----------|-----------|-----------|--|
| GO:0000325           | 1            | AT1G63010                              |           |           |           |           |           |  |
| GO:0003676           | 1            | AT1G76010                              |           |           |           |           |           |  |
| GO:0003746           | 3            | AT2G31060                              | AT4G11120 | AT4G20360 |           |           |           |  |
| GO:0003935           | 1            | AT5G64300                              |           |           |           |           |           |  |
| GO:0003984           | 1            | AT3G48560                              |           |           |           |           |           |  |
| GO:0004028           | 1            | AT4G36250                              |           |           |           |           |           |  |
| GO:0004029           | 1            | AT4G36250                              |           |           |           |           |           |  |
| GO:0004072           | 2            | AT4G19710                              | AT5G13280 |           |           |           |           |  |
| GO:0004312           | 1            | AT1G74960                              |           |           |           |           |           |  |
| GO:0004315           | 1            | AT1G74960                              |           |           |           |           |           |  |
| GO:0004412           | 1            | AT4G19710                              |           |           |           |           |           |  |
| GO:0004413           | 1            | AT2G17265                              |           |           |           |           |           |  |
| GO:0004497           | 1            | AT3G24200                              |           |           |           |           |           |  |
| GO:0004639           | 1            | AT3G21110                              |           |           |           |           |           |  |
| GO:0004737           | 1            | AT3G48560                              |           |           |           |           |           |  |
| GO:0004742           | 1            | AT1G54220                              |           |           |           |           |           |  |
| GO:0004818           | 1            | AT5G64050                              |           |           |           |           |           |  |
| GO:0005488           | 1            | AT1G52670                              |           |           |           |           |           |  |
| GO:0005525           | 1            | AT2G31060                              |           |           |           |           |           |  |
| GO:0005622           | 1            | AT2G31060                              |           |           |           |           |           |  |
| GO:0005730           | 1            | AT4G20360                              |           |           |           |           |           |  |
| GO:0005739           | 4            | AT1G54220                              | AT4G11120 | AT5G42650 | AT5G64050 |           |           |  |
| GO:0005774           | 1            | AT1G63010                              |           |           |           |           |           |  |
| GO:0005777           | 1            | AT1G20510                              |           |           |           |           |           |  |
| GO:0005783           | 1            | AT4G36250                              |           |           |           |           |           |  |
| GO:0006081           | 1            | AT4G36250                              |           |           |           |           |           |  |
| GO:0006086           | 1            | AT1G54220                              |           |           |           |           |           |  |
| GO:0006090           | 1            | AT1G54220                              |           |           |           |           |           |  |
| GO:0006164           | 1            | AT3G21110                              |           |           |           |           |           |  |
| GO:0006414           | 1            | AT4G11120                              |           |           |           |           |           |  |
| GO:0006424           | 1            | AT5G64050                              |           |           |           |           |           |  |
| GO:0006633           | 2            | AT1G74960                              | AT5G15530 |           |           |           |           |  |
| GO:0006636           | 1            | AT1G74960                              |           |           |           |           |           |  |
| GO:0006725           | 1            | AT3G24200                              |           |           |           |           |           |  |
| GO:0006744           | 1            | AT3G24200                              |           |           |           |           |           |  |
| GO:0006952           | 1            | AT5G42650                              |           |           |           |           |           |  |
| GO:0007005           | 1            | AT5G64050                              |           |           |           |           |           |  |
| GO:0008152           | 3            | AT1G54220                              | AT3G24200 | AT4G36250 |           |           |           |  |
| GO:0008652           | 1            | AT5G13280                              |           |           |           |           |           |  |
| GO:0008686           | 1            | AT5G64300                              |           |           |           |           |           |  |
| GO:0009067           | 1            | AT4G19710                              |           |           |           |           |           |  |
| GO:0009082           | 1            | AT3G48560                              |           |           |           |           |           |  |
| GO:0009086           | 1            | AT2G17265                              |           |           |           |           |           |  |
| GO:0009088           | 1            | AT2G17265                              |           |           |           |           |           |  |
| GO:0009231           | 1            | AT5G64300                              |           |           |           |           |           |  |
| GO:0009295           | 1            | AT4G20360                              |           |           |           |           |           |  |
| GO:0009374           | 1            | AT5G15530                              |           |           |           |           |           |  |
| GO:0009507           | 12           | AT1G52670                              | AT1G74960 | AT2G17265 | AT3G21110 | AT3G48560 | AT4G19710 |  |
|                      |              | AT4G20360                              | AT5G13280 | AT5G15530 | AT5G42650 | AT5G64050 | AT5G64300 |  |
| GO:0009535           | 2            | AT4G20360                              | AT5G42650 |           |           |           |           |  |
| GO:0009536           | 1            | AT1G74960                              |           |           |           |           |           |  |
| GO:0009570           | 2            | AT2G17265                              | AT4G20360 |           |           |           |           |  |
| GO:0009579           | 1            | AT5G42650                              |           |           |           |           |           |  |
| GO:0009611           | 2            | AT1G20510                              | AT5G42650 |           |           |           |           |  |
| GO:0009620           | 1            | AT5G42650                              |           |           |           |           |           |  |
| GO:0009658           | 1            | AT5G64050                              |           |           |           |           |           |  |
| GO:0009695           | 2            | AT1G20510                              | AT5G42650 |           |           |           |           |  |
| GO:0009698           | 1            | AT1G20510                              |           |           |           |           |           |  |
| GO:0009733           | 1            | AT3G21110                              |           |           |           |           |           |  |
| GO:0009753           | 1            | AT5G42650                              |           |           |           |           |           |  |

**Cluster 43 (con.)**

| <b>GO Identifier</b> | <b>#Loci</b> | <b>Associated Loci (Left to Right)</b> |           |           |           |
|----------------------|--------------|----------------------------------------|-----------|-----------|-----------|
| GO:0009941           | 2            | AT4G20360                              | AT5G42650 |           |           |
| GO:0009978           | 1            | AT5G42650                              |           |           |           |
| GO:0010287           | 1            | AT5G42650                              |           |           |           |
| GO:0016020           | 4            | AT4G20360                              | AT4G36250 | AT5G42650 | AT5G64300 |
| GO:0016021           | 1            | AT4G27860                              |           |           |           |
| GO:0016207           | 1            | AT1G20510                              |           |           |           |
| GO:0016836           | 1            | AT5G42650                              |           |           |           |
| GO:0018119           | 1            | AT4G20360                              |           |           |           |
| GO:0019373           | 1            | AT5G42650                              |           |           |           |
| GO:0019825           | 1            | AT5G42650                              |           |           |           |
| GO:0031407           | 1            | AT5G42650                              |           |           |           |
| GO:0043039           | 1            | AT5G64050                              |           |           |           |
| GO:0048046           | 1            | AT4G20360                              |           |           |           |
| GO:0048481           | 1            | AT5G64050                              |           |           |           |

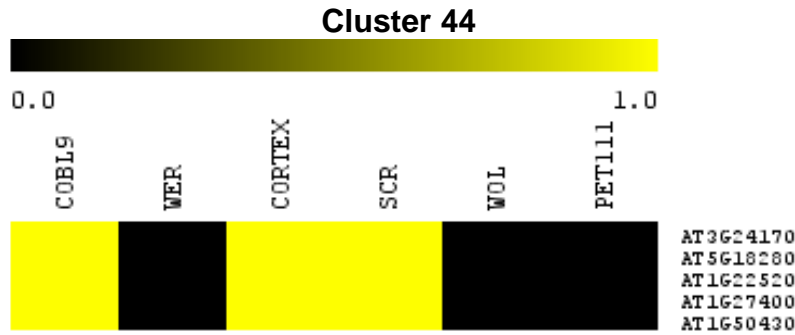

**Cluster 44**  
 AT1G22520  
 AT1G27400  
 AT1G50430  
 AT3G24170  
 AT5G18280

| Cluster 44<br>GO identifier | Description                                | #<br>Associated<br>to the GO<br>in Cluster | Total # in<br>Cluster | p-value     |
|-----------------------------|--------------------------------------------|--------------------------------------------|-----------------------|-------------|
| GO:0009918                  | sterol delta7 reductase activity           | 1                                          | 5                     | 2.40E-04    |
| GO:0004362                  | glutathione-disulfide reductase activity   | 1                                          | 5                     | 4.79E-04    |
| GO:0004551                  | nucleotide diphosphatase activity          | 1                                          | 5                     | 4.79E-04    |
| GO:0006749                  | glutathione metabolic process              | 1                                          | 5                     | 4.79E-04    |
| GO:0030176                  | integral to endoplasmic reticulum membrane | 1                                          | 5                     | 0.001437125 |
| GO:0016132                  | brassinosteroid biosynthetic process       | 1                                          | 5                     | 0.00239337  |
| GO:0016126                  | sterol biosynthetic process                | 1                                          | 5                     | 0.005253299 |
| GO:0009846                  | pollen germination                         | 1                                          | 5                     | 0.00596622  |
| GO:0045454                  | cell redox homeostasis                     | 1                                          | 5                     | 0.010933639 |
| GO:0009826                  | unidimensional cell growth                 | 1                                          | 5                     | 0.018658499 |
| GO:0022625                  | cytosolic large ribosomal subunit          | 1                                          | 5                     | 0.023522999 |
| GO:0005777                  | peroxisome                                 | 1                                          | 5                     | 0.026055215 |
| GO:0016887                  | ATPase activity                            | 1                                          | 5                     | 0.026743933 |
| GO:0005794                  | Golgi apparatus                            | 1                                          | 5                     | 0.029947276 |
| GO:0005840                  | ribosome                                   | 1                                          | 5                     | 0.042585818 |
| GO:0005886                  | plasma membrane                            | 2                                          | 5                     | 0.049853434 |
| GO:0003735                  | structural constituent of ribosome         | 1                                          | 5                     | 0.064467462 |
| GO:0006412                  | translation                                | 1                                          | 5                     | 0.067034781 |
| GO:0005773                  | vacuole                                    | 1                                          | 5                     | 0.09748675  |
| GO:0005739                  | mitochondrion                              | 1                                          | 5                     | 0.158671062 |
| GO:0009507                  | chloroplast                                | 1                                          | 5                     | 0.348502152 |

**Cluster 44**

| <u>GO Identifier</u> | <u>#Loci</u> | <u>Associated Loci (Left to Right)</u> |
|----------------------|--------------|----------------------------------------|
| GO:0003735           | 1            | AT1G27400                              |
| GO:0004362           | 1            | AT3G24170                              |
| GO:0004551           | 1            | AT5G18280                              |
| GO:0005739           | 1            | AT1G22520                              |
| GO:0005773           | 1            | AT1G27400                              |
| GO:0005777           | 1            | AT3G24170                              |
| GO:0005794           | 1            | AT5G18280                              |
| GO:0005840           | 1            | AT1G27400                              |
| GO:0005886           | 2            | AT1G27400 AT1G50430                    |
| GO:0006412           | 1            | AT1G27400                              |
| GO:0006749           | 1            | AT3G24170                              |
| GO:0009507           | 1            | AT1G27400                              |
| GO:0009826           | 1            | AT1G50430                              |
| GO:0009846           | 1            | AT5G18280                              |
| GO:0009918           | 1            | AT1G50430                              |
| GO:0016126           | 1            | AT1G50430                              |
| GO:0016132           | 1            | AT1G50430                              |
| GO:0016887           | 1            | AT5G18280                              |
| GO:0022625           | 1            | AT1G27400                              |
| GO:0030176           | 1            | AT1G50430                              |
| GO:0045454           | 1            | AT3G24170                              |

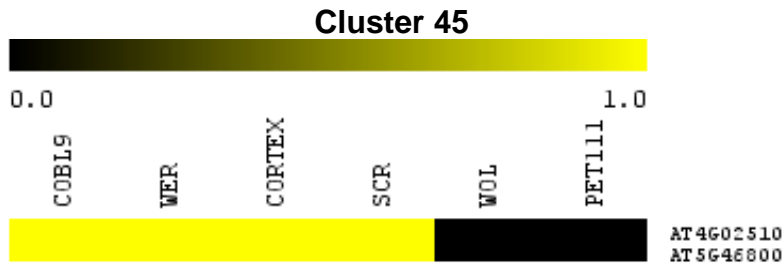

**Cluster 45**  
AT4G02510  
AT5G46800

| Cluster 45<br>GO identifier | Description                      | #<br>Associated<br>to the GO<br>in Cluster | Total # in<br>Cluster | p-value     |
|-----------------------------|----------------------------------|--------------------------------------------|-----------------------|-------------|
| GO:0009536                  | plastid                          | 2                                          | 2                     | 3.86E-05    |
| GO:0015822                  | ornithine transport              | 1                                          | 2                     | 9.59E-05    |
| GO:0045036                  | protein targeting to chloroplast | 1                                          | 2                     | 8.63E-04    |
| GO:0005739                  | mitochondrion                    | 2                                          | 2                     | 0.001357963 |
| GO:0009707                  | chloroplast outer membrane       | 1                                          | 2                     | 0.002107681 |
| GO:0006839                  | mitochondrial transport          | 1                                          | 2                     | 0.004019892 |
| GO:0005743                  | mitochondrial inner membrane     | 1                                          | 2                     | 0.007166997 |
| GO:0004888                  | transmembrane receptor activity  | 1                                          | 2                     | 0.010114245 |
| GO:0009507                  | chloroplast                      | 2                                          | 2                     | 0.012574049 |
| GO:0006810                  | transport                        | 1                                          | 2                     | 0.030125688 |
| GO:0009941                  | chloroplast envelope             | 1                                          | 2                     | 0.034855244 |
| GO:0005488                  | binding                          | 1                                          | 2                     | 0.041583373 |
| GO:0016020                  | membrane                         | 1                                          | 2                     | 0.119837161 |

**Cluster 45**

| <u>GO Identifier</u> | <u>#Loci</u> | <u>Associated Loci (Left to Right)</u> |
|----------------------|--------------|----------------------------------------|
| GO:0004888           | 1            | AT4G02510                              |
| GO:0005488           | 1            | AT5G46800                              |
| GO:0005739           | 2            | AT4G02510 AT5G46800                    |

**Cluster 45 (con.)**

| <b>GO Identifier</b> | <b>#Loci</b> | <b>Associated Loci (Left to Right)</b> |
|----------------------|--------------|----------------------------------------|
| GO:0005743           | 1            | AT5G46800                              |
| GO:0006810           | 1            | AT5G46800                              |
| GO:0006839           | 1            | AT5G46800                              |
| GO:0009507           | 2            | AT4G02510 AT5G46800                    |
| GO:0009536           | 2            | AT4G02510 AT5G46800                    |
| GO:0009707           | 1            | AT4G02510                              |
| GO:0009941           | 1            | AT4G02510                              |
| GO:0015822           | 1            | AT5G46800                              |
| GO:0016020           | 1            | AT4G02510                              |
| GO:0045036           | 1            | AT4G02510                              |

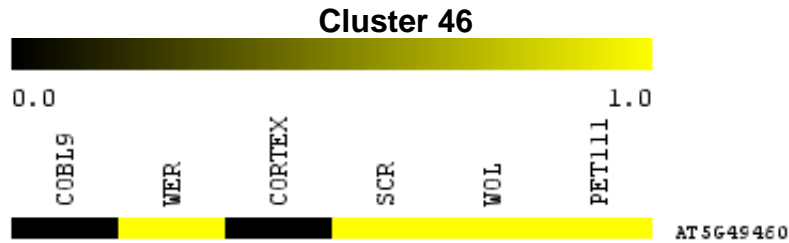

**Cluster 46**  
AT5G49460

| Cluster 46<br>GO identifier | Description                     | #<br>Associated<br>to the GO<br>in Cluster | Total # in<br>Cluster | p-value     |
|-----------------------------|---------------------------------|--------------------------------------------|-----------------------|-------------|
| GO:0009346                  | citrate lyase complex           | 1                                          | 1                     | 2.40E-04    |
| GO:0003878                  | ATP citrate synthase activity   | 1                                          | 1                     | 2.88E-04    |
| GO:0006085                  | acetyl-CoA biosynthetic process | 1                                          | 1                     | 2.88E-04    |
| GO:0005829                  | cytosol                         | 1                                          | 1                     | 0.008247423 |
| GO:0005886                  | plasma membrane                 | 1                                          | 1                     | 0.08002877  |

**Cluster 46**

| <b>GO Identifier</b> | <b>#Loci</b> | <b>Associated Loci (Left to Right)</b> |
|----------------------|--------------|----------------------------------------|
| GO:0003878           | 1            | AT5G49460                              |
| GO:0005829           | 1            | AT5G49460                              |
| GO:0005886           | 1            | AT5G49460                              |
| GO:0006085           | 1            | AT5G49460                              |
| GO:0009346           | 1            | AT5G49460                              |

## Cluster 47

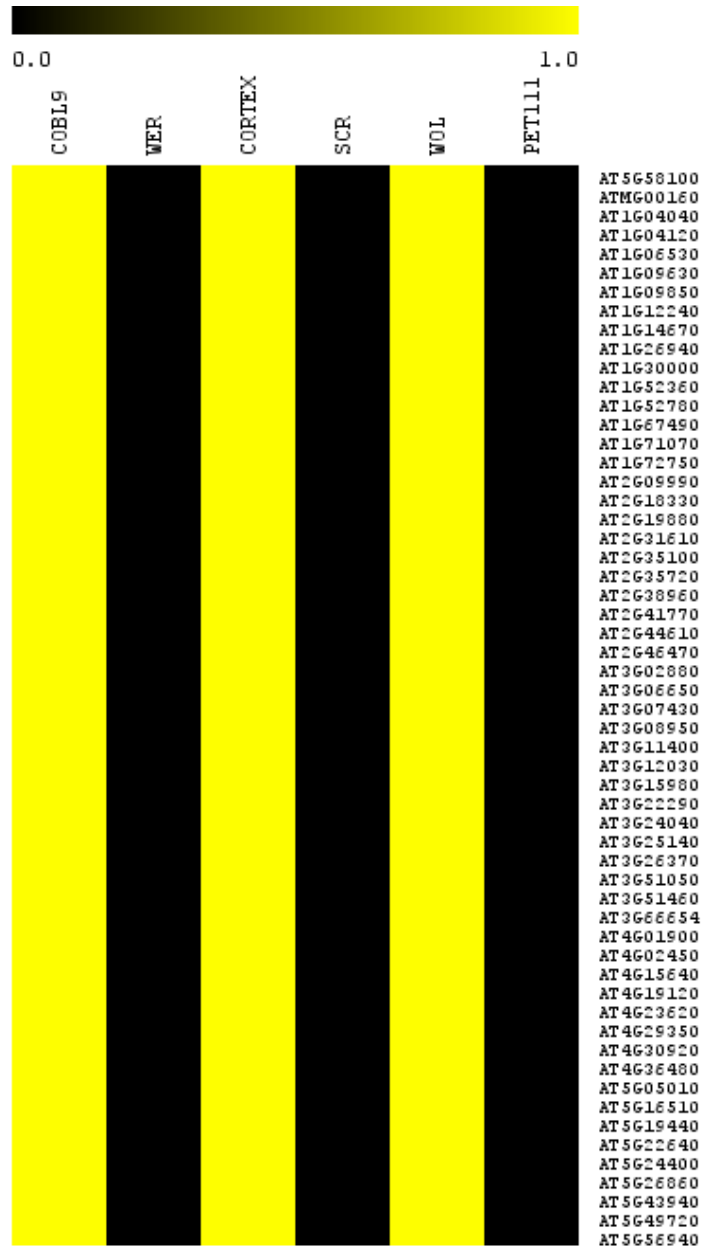

### Cluster 47

|           |           |           |           |
|-----------|-----------|-----------|-----------|
| AT1G04040 | AT2G09990 | AT3G02880 | AT4G01900 |
| AT1G04120 | AT2G18330 | AT3G06650 | AT4G02450 |
| AT1G06530 | AT2G19880 | AT3G07430 | AT4G15640 |
| AT1G09630 | AT2G31610 | AT3G08950 | AT4G19120 |
| AT1G09850 | AT2G35100 | AT3G11400 | AT4G23620 |
| AT1G12240 | AT2G35720 | AT3G12030 | AT4G29350 |
| AT1G14670 | AT2G38960 | AT3G15980 | AT4G30920 |
| AT1G26940 | AT2G41770 | AT3G22290 | AT4G36480 |
| AT1G30000 | AT2G44610 | AT3G24040 | AT5G05010 |
| AT1G52360 | AT2G46470 | AT3G25140 | AT5G16510 |
| AT1G52780 |           | AT3G26370 | AT5G19440 |
| AT1G67490 |           | AT3G51050 | AT5G22640 |
| AT1G71070 |           | AT3G51460 | AT5G24400 |
| AT1G72750 |           | AT3G66654 | AT5G26860 |
|           |           |           | AT5G43940 |

**Cluster 47  
(con.)**

AT5G49720  
AT5G56940  
AT5G58100  
ATMG00160

| Cluster 47<br>GO identifier | Description                                           | #<br>Associated<br>to the GO<br>in Cluster | Total # in<br>Cluster | p-value     |
|-----------------------------|-------------------------------------------------------|--------------------------------------------|-----------------------|-------------|
| GO:0005794                  | Golgi apparatus                                       | 6                                          | 56                    | 1.15E-06    |
| GO:0045489                  | pectin biosynthetic process                           | 2                                          | 56                    | 2.12E-05    |
| GO:0006461                  | protein complex assembly                              | 3                                          | 56                    | 3.09E-05    |
| GO:0030126                  | COPI vesicle coat                                     | 2                                          | 56                    | 1.05E-04    |
| GO:0005886                  | plasma membrane                                       | 13                                         | 56                    | 2.83E-04    |
| GO:0005739                  | mitochondrion                                         | 8                                          | 56                    | 7.85E-04    |
| GO:0009504                  | cell plate                                            | 2                                          | 56                    | 8.20E-04    |
| GO:0008565                  | protein transporter activity                          | 3                                          | 56                    | 8.81E-04    |
| GO:0016192                  | vesicle-mediated transport                            | 3                                          | 56                    | 0.001070306 |
| GO:0007160                  | cell-matrix adhesion                                  | 1                                          | 56                    | 0.002685207 |
| GO:0008120                  | ceramide glucosyltransferase activity                 | 1                                          | 56                    | 0.002685207 |
| GO:0008281                  | sulfonylurea receptor activity                        | 1                                          | 56                    | 0.002685207 |
| GO:0008305                  | integrin complex                                      | 1                                          | 56                    | 0.002685207 |
| GO:0010307                  | acetylglutamate kinase regulator activity             | 1                                          | 56                    | 0.002685207 |
| GO:0031520                  | plasma membrane of cell tip                           | 1                                          | 56                    | 0.002685207 |
| GO:0043812                  | phosphatidylinositol-4-phosphate phosphatase activity | 1                                          | 56                    | 0.002685207 |
| GO:0046292                  | formaldehyde metabolic process                        | 1                                          | 56                    | 0.002685207 |
| GO:0051903                  | S-(hydroxymethyl)glutathione dehydrogenase activity   | 1                                          | 56                    | 0.002685207 |
| GO:0009505                  | plant-type cell wall                                  | 4                                          | 56                    | 0.003376065 |
| GO:0006886                  | intracellular protein transport                       | 3                                          | 56                    | 0.003483808 |
| GO:0009536                  | plastid                                               | 3                                          | 56                    | 0.004744316 |
| GO:0005198                  | structural molecule activity                          | 2                                          | 56                    | 0.005248165 |
| GO:0004558                  | alpha-glucosidase activity                            | 1                                          | 56                    | 0.005356251 |
| GO:0004758                  | serine C-palmitoyltransferase activity                | 1                                          | 56                    | 0.005356251 |
| GO:0005624                  | membrane fraction                                     | 1                                          | 56                    | 0.005356251 |
| GO:0008154                  | actin polymerization or depolymerization              | 1                                          | 56                    | 0.005356251 |
| GO:0032940                  | secretion by cell                                     | 1                                          | 56                    | 0.005356251 |
| GO:0016020                  | membrane                                              | 9                                          | 56                    | 0.006051205 |
| GO:0016051                  | carbohydrate biosynthetic process                     | 2                                          | 56                    | 0.006811602 |
| GO:0016757                  | transferase activity, transferring glycosyl groups    | 4                                          | 56                    | 0.00708799  |
| GO:0005769                  | early endosome                                        | 1                                          | 56                    | 0.008013186 |
| GO:0008097                  | 5S rRNA binding                                       | 1                                          | 56                    | 0.008013186 |
| GO:0008466                  | glycogenin glucosyltransferase activity               | 1                                          | 56                    | 0.008013186 |
| GO:0010289                  | homogalacturonan biosynthetic process                 | 1                                          | 56                    | 0.008013186 |
| GO:0030148                  | sphingolipid biosynthetic process                     | 1                                          | 56                    | 0.008013186 |
| GO:0042450                  | arginine biosynthetic process via ornithine           | 1                                          | 56                    | 0.008013186 |
| GO:0045039                  | protein import into mitochondrial inner membrane      | 1                                          | 56                    | 0.008013186 |
| GO:0006467                  | protein thiol-disulfide exchange                      | 1                                          | 56                    | 0.013284948 |
| GO:0008810                  | cellulase activity                                    | 1                                          | 56                    | 0.013284948 |
| GO:0009346                  | citrate lyase complex                                 | 1                                          | 56                    | 0.013284948 |
| GO:0030007                  | cellular potassium ion homeostasis                    | 1                                          | 56                    | 0.013284948 |
| GO:0048768                  | root hair cell tip growth                             | 1                                          | 56                    | 0.013284948 |
| GO:0003878                  | ATP citrate synthase activity                         | 1                                          | 56                    | 0.015899884 |
| GO:0006085                  | acetyl-CoA biosynthetic process                       | 1                                          | 56                    | 0.015899884 |
| GO:0009913                  | epidermal cell differentiation                        | 1                                          | 56                    | 0.015899884 |
| GO:0004559                  | alpha-mannosidase activity                            | 1                                          | 56                    | 0.01850093  |

| Cluster 47<br>GO identifier<br>(con.) | Description                                                                      | #<br>Associated<br>to the GO<br>in Cluster | Total # in<br>Cluster | p-value     |
|---------------------------------------|----------------------------------------------------------------------------------|--------------------------------------------|-----------------------|-------------|
| GO:0004022                            | alcohol dehydrogenase activity                                                   | 1                                          | 56                    | 0.021088139 |
| GO:0004439                            | phosphatidylinositol-4,5-bisphosphate 5-phosphatase activity                     | 1                                          | 56                    | 0.021088139 |
| GO:0005852                            | eukaryotic translation initiation factor 3 complex                               | 1                                          | 56                    | 0.023661566 |
| GO:0009718                            | anthocyanin biosynthetic process                                                 | 1                                          | 56                    | 0.023661566 |
| GO:0043622                            | cortical microtubule organization                                                | 1                                          | 56                    | 0.023661566 |
| GO:0010053                            | root epidermal cell differentiation                                              | 1                                          | 56                    | 0.026221264 |
| GO:0005515                            | protein binding                                                                  | 7                                          | 56                    | 0.026453836 |
| GO:0005783                            | endoplasmic reticulum                                                            | 3                                          | 56                    | 0.028748968 |
| GO:0004564                            | beta-fructofuranosidase activity                                                 | 1                                          | 56                    | 0.028767286 |
| GO:0010286                            | heat acclimation                                                                 | 1                                          | 56                    | 0.028767286 |
| GO:0015629                            | actin cytoskeleton                                                               | 1                                          | 56                    | 0.028767286 |
| GO:0006487                            | protein amino acid N-linked glycosylation                                        | 1                                          | 56                    | 0.031299687 |
| GO:0016671                            | oxidoreductase activity, acting on sulfur group of donors, disulfide as acceptor | 1                                          | 56                    | 0.031299687 |
| GO:0009793                            | embryonic development ending in seed dormancy                                    | 3                                          | 56                    | 0.032379468 |
| GO:0005777                            | peroxisome                                                                       | 2                                          | 56                    | 0.032566705 |
| GO:0010584                            | pollen exine formation                                                           | 1                                          | 56                    | 0.036323834 |
| GO:0019575                            | sucrose catabolic process, using beta-fructofuranosidase                         | 1                                          | 56                    | 0.038815687 |
| GO:0005768                            | endosome                                                                         | 1                                          | 56                    | 0.04129413  |
| GO:0008375                            | acetylglucosaminyltransferase activity                                           | 1                                          | 56                    | 0.04129413  |
| GO:0006807                            | nitrogen compound metabolic process                                              | 1                                          | 56                    | 0.046210993 |
| GO:0005744                            | mitochondrial inner membrane presequence translocase complex                     | 1                                          | 56                    | 0.051074842 |
| GO:0007010                            | cytoskeleton organization                                                        | 1                                          | 56                    | 0.051074842 |
| GO:0000910                            | cytokinesis                                                                      | 1                                          | 56                    | 0.053487016 |
| GO:0030244                            | cellulose biosynthetic process                                                   | 1                                          | 56                    | 0.053487016 |
| GO:0016049                            | cell growth                                                                      | 1                                          | 56                    | 0.058272121 |
| GO:0004553                            | hydrolase activity, hydrolyzing O-glycosyl compounds                             | 2                                          | 56                    | 0.059117221 |
| GO:0047262                            | polygalacturonate 4-alpha-galacturonosyltransferase activity                     | 1                                          | 56                    | 0.060645154 |
| GO:0048316                            | seed development                                                                 | 1                                          | 56                    | 0.063005243 |
| GO:0050660                            | FAD binding                                                                      | 1                                          | 56                    | 0.067686789 |
| GO:0005525                            | GTP binding                                                                      | 2                                          | 56                    | 0.068720488 |
| GO:0000325                            | plant-type vacuole                                                               | 1                                          | 56                    | 0.070008348 |
| GO:0005840                            | ribosome                                                                         | 2                                          | 56                    | 0.074224312 |
| GO:0008236                            | serine-type peptidase activity                                                   | 1                                          | 56                    | 0.079167665 |
| GO:0005773                            | vacuole                                                                          | 3                                          | 56                    | 0.08510904  |
| GO:0006457                            | protein folding                                                                  | 2                                          | 56                    | 0.086630873 |
| GO:0003993                            | acid phosphatase activity                                                        | 1                                          | 56                    | 0.088126299 |
| GO:0009744                            | response to sucrose stimulus                                                     | 1                                          | 56                    | 0.090334971 |
| GO:0042538                            | hyperosmotic salinity response                                                   | 1                                          | 56                    | 0.090334971 |
| GO:0005774                            | vacuolar membrane                                                                | 1                                          | 56                    | 0.096887402 |
| GO:0015450                            | P-P-bond-hydrolysis-driven protein transmembrane transporter activity            | 1                                          | 56                    | 0.103330471 |
| GO:0016021                            | integral to membrane                                                             | 2                                          | 56                    | 0.116052898 |
| GO:0003779                            | actin binding                                                                    | 1                                          | 56                    | 0.119987147 |
| GO:0003755                            | peptidyl-prolyl cis-trans isomerase activity                                     | 1                                          | 56                    | 0.126040211 |
| GO:0006413                            | translational initiation                                                         | 1                                          | 56                    | 0.128034854 |
| GO:0016758                            | transferase activity, transferring hexosyl groups                                | 1                                          | 56                    | 0.133950291 |
| GO:0003735                            | structural constituent of ribosome                                               | 2                                          | 56                    | 0.13630355  |
| GO:0046658                            | anchored to plasma membrane                                                      | 1                                          | 56                    | 0.137837294 |
| GO:0009651                            | response to salt stress                                                          | 2                                          | 56                    | 0.139310688 |
| GO:0006412                            | translation                                                                      | 2                                          | 56                    | 0.143487444 |

| Cluster 47<br>GO identifier<br>(con.) | Description                                                      | #<br>Associated<br>to the GO<br>in Cluster | Total # in<br>Cluster | p-value     |
|---------------------------------------|------------------------------------------------------------------|--------------------------------------------|-----------------------|-------------|
| GO:0005975                            | carbohydrate metabolic process                                   | 2                                          | 56                    | 0.144673306 |
| GO:0005618                            | cell wall                                                        | 2                                          | 56                    | 0.14762268  |
| GO:0003743                            | translation initiation factor activity                           | 1                                          | 56                    | 0.156606329 |
| GO:0006810                            | transport                                                        | 2                                          | 56                    | 0.156903631 |
| GO:0009055                            | electron carrier activity                                        | 1                                          | 56                    | 0.163809751 |
| GO:0005743                            | mitochondrial inner membrane                                     | 1                                          | 56                    | 0.16558399  |
| GO:0009826                            | unidimensional cell growth                                       | 1                                          | 56                    | 0.172575771 |
| GO:0015031                            | protein transport                                                | 1                                          | 56                    | 0.179401301 |
| GO:0003824                            | catalytic activity                                               | 2                                          | 56                    | 0.184609433 |
| GO:0009941                            | chloroplast envelope                                             | 2                                          | 56                    | 0.184609433 |
| GO:0042626                            | ATPase activity, coupled to transmembrane movement of substances | 1                                          | 56                    | 0.186063259 |
| GO:0042254                            | ribosome biogenesis                                              | 1                                          | 56                    | 0.195755272 |
| GO:0005507                            | copper ion binding                                               | 1                                          | 56                    | 0.21555396  |
| GO:0009416                            | response to light stimulus                                       | 1                                          | 56                    | 0.217010722 |
| GO:0009611                            | response to wounding                                             | 1                                          | 56                    | 0.217010722 |
| GO:0031072                            | heat shock protein binding                                       | 1                                          | 56                    | 0.217010722 |
| GO:0016887                            | ATPase activity                                                  | 1                                          | 56                    | 0.226950752 |
| GO:0007169                            | transmembrane receptor protein tyrosine kinase signaling pathway | 1                                          | 56                    | 0.245520229 |
| GO:0005524                            | ATP binding                                                      | 2                                          | 56                    | 0.267881489 |
| GO:0004674                            | protein serine/threonine kinase activity                         | 1                                          | 56                    | 0.295316033 |
| GO:0009535                            | chloroplast thylakoid membrane                                   | 1                                          | 56                    | 0.345505753 |
| GO:0003723                            | RNA binding                                                      | 1                                          | 56                    | 0.362420375 |
| GO:0006508                            | proteolysis                                                      | 1                                          | 56                    | 0.369923141 |
| GO:0009570                            | chloroplast stroma                                               | 1                                          | 56                    | 0.371244355 |

### Cluster 47

| <u>GO Identifier</u> | <u>#Loci</u> | <u>Associated Loci (Left to Right)</u> |           |           |           |           |           |
|----------------------|--------------|----------------------------------------|-----------|-----------|-----------|-----------|-----------|
| GO:0000325           | 1            | AT1G04120                              |           |           |           |           |           |
| GO:0000910           | 1            | AT1G09630                              |           |           |           |           |           |
| GO:0003723           | 1            | AT3G11400                              |           |           |           |           |           |
| GO:0003735           | 2            | AT4G23620                              | AT5G56940 |           |           |           |           |
| GO:0003743           | 1            | AT3G11400                              |           |           |           |           |           |
| GO:0003755           | 1            | AT1G26940                              |           |           |           |           |           |
| GO:0003779           | 1            | AT4G29350                              |           |           |           |           |           |
| GO:0003824           | 2            | AT2G35100                              | AT5G24400 |           |           |           |           |
| GO:0003878           | 1            | AT3G06650                              |           |           |           |           |           |
| GO:0003993           | 1            | AT1G04040                              |           |           |           |           |           |
| GO:0004022           | 1            | AT5G19440                              |           |           |           |           |           |
| GO:0004439           | 1            | AT3G51460                              |           |           |           |           |           |
| GO:0004553           | 2            | AT1G12240                              | AT5G49720 |           |           |           |           |
| GO:0004558           | 1            | AT1G67490                              |           |           |           |           |           |
| GO:0004559           | 1            | AT1G30000                              |           |           |           |           |           |
| GO:0004564           | 1            | AT1G12240                              |           |           |           |           |           |
| GO:0004674           | 1            | AT3G02880                              |           |           |           |           |           |
| GO:0004758           | 1            | AT4G36480                              |           |           |           |           |           |
| GO:0005198           | 2            | AT1G52360                              | AT3G15980 |           |           |           |           |
| GO:0005507           | 1            | AT3G08950                              |           |           |           |           |           |
| GO:0005515           | 7            | AT1G52360                              | AT2G38960 | AT2G44610 | AT3G15980 | AT4G29350 | AT4G36480 |
|                      |              | AT5G05010                              |           |           |           |           |           |
| GO:0005524           | 2            | AT3G02880                              | AT5G26860 |           |           |           |           |
| GO:0005525           | 2            | AT1G09630                              | AT2G44610 |           |           |           |           |
| GO:0005618           | 2            | AT1G04040                              | AT3G02880 |           |           |           |           |
| GO:0005624           | 1            | AT2G44610                              |           |           |           |           |           |



**Cluster 47 (con.)**

| <b>GO Identifier</b> | <b>#Loci</b> | <b>Associated Loci (Left to Right)</b> |           |           |           |           |           |
|----------------------|--------------|----------------------------------------|-----------|-----------|-----------|-----------|-----------|
| GO:0005739           | 8            | AT1G06530                              | AT1G72750 | AT2G35720 | AT2G46470 | AT3G08950 | AT3G25140 |
|                      |              | AT4G15640                              | AT5G26860 |           |           |           |           |
| GO:0005743           | 1            | AT1G72750                              |           |           |           |           |           |
| GO:0005744           | 1            | AT1G72750                              |           |           |           |           |           |
| GO:0005768           | 1            | AT1G09630                              |           |           |           |           |           |
| GO:0005769           | 1            | AT5G49720                              |           |           |           |           |           |
| GO:0005773           | 3            | AT1G04040                              | AT1G09850 | AT1G12240 |           |           |           |
| GO:0005774           | 1            | AT1G04120                              |           |           |           |           |           |
| GO:0005777           | 2            | AT5G24400                              | AT5G43940 |           |           |           |           |
| GO:0005783           | 3            | AT1G67490                              | AT2G38960 | AT4G36480 |           |           |           |
| GO:0005794           | 6            | AT1G14670                              | AT1G30000 | AT3G25140 | AT3G26370 | AT5G16510 | AT5G49720 |
| GO:0005840           | 2            | AT4G23620                              | AT5G56940 |           |           |           |           |
| GO:0005852           | 1            | AT3G11400                              |           |           |           |           |           |
| GO:0005886           | 13           | AT1G04040                              | AT1G04120 | AT1G06530 | AT1G09630 | AT2G44610 | AT3G02880 |
|                      |              | AT3G11400                              | AT3G51050 | AT3G51460 | AT4G02450 | AT4G29350 | AT5G19440 |
|                      |              | AT5G49720                              |           |           |           |           |           |
| GO:0005975           | 2            | AT1G12240                              | AT5G24400 |           |           |           |           |
| GO:0006085           | 1            | AT3G06650                              |           |           |           |           |           |
| GO:0006412           | 2            | AT4G23620                              | AT5G56940 |           |           |           |           |
| GO:0006413           | 1            | AT3G11400                              |           |           |           |           |           |
| GO:0006457           | 2            | AT1G26940                              | AT2G35720 |           |           |           |           |
| GO:0006461           | 3            | AT1G52360                              | AT3G15980 | AT5G05010 |           |           |           |
| GO:0006467           | 1            | AT2G38960                              |           |           |           |           |           |
| GO:0006487           | 1            | AT1G30000                              |           |           |           |           |           |
| GO:0006508           | 1            | AT1G09850                              |           |           |           |           |           |
| GO:0006807           | 1            | AT4G01900                              |           |           |           |           |           |
| GO:0006810           | 2            | AT1G14670                              | AT5G05010 |           |           |           |           |
| GO:0006886           | 3            | AT1G52360                              | AT3G15980 | AT5G05010 |           |           |           |
| GO:0007010           | 1            | AT4G29350                              |           |           |           |           |           |
| GO:0007160           | 1            | AT3G51050                              |           |           |           |           |           |
| GO:0007169           | 1            | AT3G02880                              |           |           |           |           |           |
| GO:0008097           | 1            | AT4G23620                              |           |           |           |           |           |
| GO:0008120           | 1            | AT2G19880                              |           |           |           |           |           |
| GO:0008154           | 1            | AT4G29350                              |           |           |           |           |           |
| GO:0008236           | 1            | AT5G26860                              |           |           |           |           |           |
| GO:0008281           | 1            | AT1G04120                              |           |           |           |           |           |
| GO:0008305           | 1            | AT3G51050                              |           |           |           |           |           |
| GO:0008375           | 1            | AT1G71070                              |           |           |           |           |           |
| GO:0008466           | 1            | AT5G16510                              |           |           |           |           |           |
| GO:0008565           | 3            | AT1G52360                              | AT3G15980 | AT5G05010 |           |           |           |
| GO:0008810           | 1            | AT5G49720                              |           |           |           |           |           |
| GO:0009055           | 1            | AT2G38960                              |           |           |           |           |           |
| GO:0009346           | 1            | AT3G06650                              |           |           |           |           |           |
| GO:0009416           | 1            | AT4G01900                              |           |           |           |           |           |
| GO:0009504           | 2            | AT1G09630                              | AT5G49720 |           |           |           |           |
| GO:0009505           | 4            | AT1G04040                              | AT1G12240 | AT3G02880 | AT5G16510 |           |           |
| GO:0009535           | 1            | AT5G22640                              |           |           |           |           |           |
| GO:0009536           | 3            | AT1G06530                              | AT2G35720 | AT3G08950 |           |           |           |
| GO:0009570           | 1            | AT5G24400                              |           |           |           |           |           |
| GO:0009611           | 1            | AT5G43940                              |           |           |           |           |           |
| GO:0009651           | 2            | AT1G04120                              | AT5G16510 |           |           |           |           |
| GO:0009718           | 1            | AT4G01900                              |           |           |           |           |           |
| GO:0009744           | 1            | AT4G01900                              |           |           |           |           |           |
| GO:0009793           | 3            | AT3G07430                              | AT5G22640 | AT5G24400 |           |           |           |
| GO:0009826           | 1            | AT5G49720                              |           |           |           |           |           |
| GO:0009913           | 1            | AT1G67490                              |           |           |           |           |           |
| GO:0009941           | 2            | AT3G07430                              | AT5G22640 |           |           |           |           |
| GO:0010053           | 1            | AT1G67490                              |           |           |           |           |           |
| GO:0010286           | 1            | AT5G43940                              |           |           |           |           |           |
| GO:0010289           | 1            | AT3G25140                              |           |           |           |           |           |

**Cluster 47 (con.)**

| <u>GO Identifier</u> | <u>#Loci</u> | <u>Associated Loci (Left to Right)</u> |           |           |           |           |           |
|----------------------|--------------|----------------------------------------|-----------|-----------|-----------|-----------|-----------|
| GO:0010307           | 1            | AT4G01900                              |           |           |           |           |           |
| GO:0010584           | 1            | AT5G58100                              |           |           |           |           |           |
| GO:0015031           | 1            | AT1G72750                              |           |           |           |           |           |
| GO:0015450           | 1            | AT1G72750                              |           |           |           |           |           |
| GO:0015629           | 1            | AT4G29350                              |           |           |           |           |           |
| GO:0016020           | 9            | AT1G14670                              | AT1G71070 | AT1G72750 | AT2G35100 | AT2G46470 | AT3G02880 |
|                      |              | AT3G06650                              | AT3G24040 | AT5G05010 |           |           |           |
| GO:0016021           | 2            | AT1G14670                              | AT3G51050 |           |           |           |           |
| GO:0016049           | 1            | AT4G36480                              |           |           |           |           |           |
| GO:0016051           | 2            | AT1G71070                              | AT3G25140 |           |           |           |           |
| GO:0016192           | 3            | AT1G52360                              | AT3G15980 | AT5G05010 |           |           |           |
| GO:0016671           | 1            | AT2G38960                              |           |           |           |           |           |
| GO:0016757           | 4            | AT1G71070                              | AT2G35100 | AT3G24040 | AT3G25140 |           |           |
| GO:0016758           | 1            | AT3G25140                              |           |           |           |           |           |
| GO:0016887           | 1            | AT2G18330                              |           |           |           |           |           |
| GO:0019575           | 1            | AT1G12240                              |           |           |           |           |           |
| GO:0030007           | 1            | AT1G04120                              |           |           |           |           |           |
| GO:0030126           | 2            | AT1G52360                              | AT3G15980 |           |           |           |           |
| GO:0030148           | 1            | AT4G36480                              |           |           |           |           |           |
| GO:0030244           | 1            | AT5G49720                              |           |           |           |           |           |
| GO:0031072           | 1            | AT2G35720                              |           |           |           |           |           |
| GO:0031520           | 1            | AT3G51460                              |           |           |           |           |           |
| GO:0032940           | 1            | AT2G44610                              |           |           |           |           |           |
| GO:0042254           | 1            | AT5G56940                              |           |           |           |           |           |
| GO:0042450           | 1            | AT4G01900                              |           |           |           |           |           |
| GO:0042538           | 1            | AT5G49720                              |           |           |           |           |           |
| GO:0042626           | 1            | AT1G04120                              |           |           |           |           |           |
| GO:0043622           | 1            | AT5G49720                              |           |           |           |           |           |
| GO:0043812           | 1            | AT3G51460                              |           |           |           |           |           |
| GO:0045039           | 1            | AT2G46470                              |           |           |           |           |           |
| GO:0045489           | 2            | AT2G35100                              | AT3G25140 |           |           |           |           |
| GO:0046292           | 1            | AT5G43940                              |           |           |           |           |           |
| GO:0046658           | 1            | AT3G02880                              |           |           |           |           |           |
| GO:0047262           | 1            | AT3G25140                              |           |           |           |           |           |
| GO:0048316           | 1            | AT5G43940                              |           |           |           |           |           |
| GO:0048768           | 1            | AT3G51460                              |           |           |           |           |           |
| GO:0050660           | 1            | AT2G38960                              |           |           |           |           |           |
| GO:0051903           | 1            | AT5G43940                              |           |           |           |           |           |

**Cluster 48**

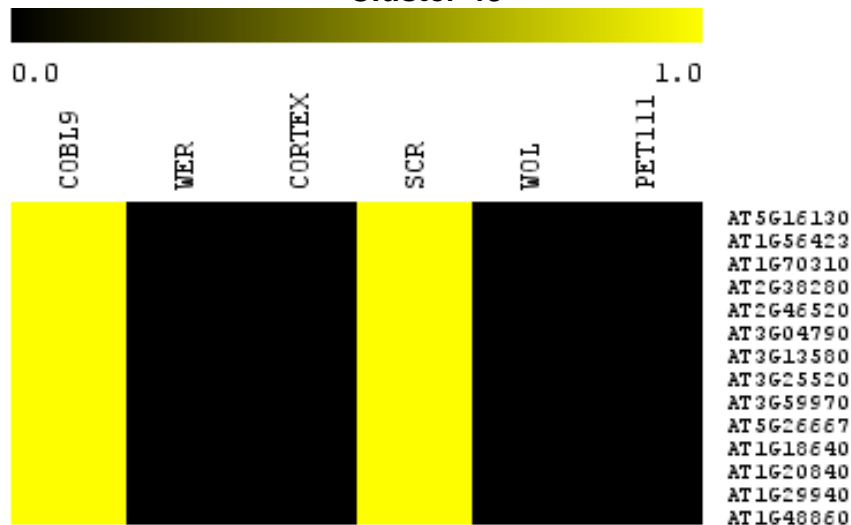

**Cluster 48**

AT1G18640  
 AT1G20840  
 AT1G29940  
 AT1G48860  
 AT1G56423  
 AT1G70310  
 AT2G38280  
 AT2G46520  
 AT3G04790  
 AT3G13580  
 AT3G25520  
 AT3G59970  
 AT5G16130  
 AT5G26667

| Cluster 48<br>GO identifier | Description                                              | #<br>Associated<br>to the GO<br>in Cluster | Total # in<br>Cluster | p-value     |
|-----------------------------|----------------------------------------------------------|--------------------------------------------|-----------------------|-------------|
| GO:0022626                  | cytosolic ribosome                                       | 3                                          | 14                    | 1.68E-04    |
| GO:0003876                  | AMP deaminase activity                                   | 1                                          | 14                    | 6.71E-04    |
| GO:0004647                  | phosphoserine phosphatase activity                       | 1                                          | 14                    | 6.71E-04    |
| GO:0003735                  | structural constituent of ribosome                       | 3                                          | 14                    | 7.84E-04    |
| GO:0006412                  | translation                                              | 3                                          | 14                    | 8.82E-04    |
| GO:0016020                  | membrane                                                 | 5                                          | 14                    | 0.001180548 |
| GO:0009168                  | purine ribonucleoside monophosphate biosynthetic process | 1                                          | 14                    | 0.001341767 |
| GO:0022625                  | cytosolic large ribosomal subunit                        | 2                                          | 14                    | 0.001957586 |
| GO:0004766                  | spermidine synthase activity                             | 1                                          | 14                    | 0.002011395 |
| GO:0008097                  | 5S rRNA binding                                          | 1                                          | 14                    | 0.002011395 |
| GO:0008295                  | spermidine biosynthetic process                          | 1                                          | 14                    | 0.002011395 |
| GO:0004751                  | ribose-5-phosphate isomerase activity                    | 1                                          | 14                    | 0.002680189 |
| GO:0006564                  | L-serine biosynthetic process                            | 1                                          | 14                    | 0.002680189 |
| GO:0009955                  | adaxial/abaxial pattern formation                        | 1                                          | 14                    | 0.002680189 |
| GO:0005337                  | nucleoside transmembrane transporter activity            | 1                                          | 14                    | 0.004015271 |
| GO:0019253                  | reductive pentose-phosphate cycle                        | 1                                          | 14                    | 0.006675442 |
| GO:0009750                  | response to fructose stimulus                            | 1                                          | 14                    | 0.007338407 |
| GO:0000059                  | protein import into nucleus, docking                     | 1                                          | 14                    | 0.008661848 |
| GO:0005730                  | nucleolus                                                | 2                                          | 14                    | 0.010295194 |
| GO:0006913                  | nucleocytoplasmic transport                              | 1                                          | 14                    | 0.011955967 |
| GO:0005643                  | nuclear pore                                             | 1                                          | 14                    | 0.015229468 |
| GO:0005792                  | microsom                                                 | 1                                          | 14                    | 0.015881702 |
| GO:0005886                  | plasma membrane                                          | 4                                          | 14                    | 0.01780227  |
| GO:0015934                  | large ribosomal subunit                                  | 1                                          | 14                    | 0.022359031 |
| GO:0009705                  | plant-type vacuole membrane                              | 1                                          | 14                    | 0.024927148 |
| GO:0005737                  | cytoplasm                                                | 2                                          | 14                    | 0.02936112  |
| GO:0003899                  | DNA-directed RNA polymerase activity                     | 1                                          | 14                    | 0.029390174 |
| GO:0006350                  | transcription                                            | 1                                          | 14                    | 0.031290801 |
| GO:0005773                  | vacuole                                                  | 2                                          | 14                    | 0.031698763 |
| GO:0009624                  | response to nematode                                     | 1                                          | 14                    | 0.033813724 |
| GO:0008565                  | protein transporter activity                             | 1                                          | 14                    | 0.045623401 |
| GO:0009507                  | chloroplast                                              | 4                                          | 14                    | 0.048173604 |
| GO:0015144                  | carbohydrate transmembrane transporter activity          | 1                                          | 14                    | 0.048683762 |
| GO:0005351                  | sugar:hydrogen symporter activity                        | 1                                          | 14                    | 0.049902412 |
| GO:0022627                  | cytosolic small ribosomal subunit                        | 1                                          | 14                    | 0.051117931 |
| GO:0042254                  | ribosome biogenesis                                      | 1                                          | 14                    | 0.058942862 |

| Cluster 48<br>GO identifier<br>(con.) | Description                                   | #<br>Associated<br>to the GO<br>in Cluster | Total # in<br>Cluster | p-value     |
|---------------------------------------|-----------------------------------------------|--------------------------------------------|-----------------------|-------------|
| GO:0005634                            | nucleus                                       | 3                                          | 14                    | 0.078001142 |
| GO:0042742                            | defense response to bacterium                 | 1                                          | 14                    | 0.082773182 |
| GO:0009579                            | thylakoid                                     | 1                                          | 14                    | 0.102662897 |
| GO:0005840                            | ribosome                                      | 1                                          | 14                    | 0.110143484 |
| GO:0009535                            | chloroplast thylakoid membrane                | 1                                          | 14                    | 0.142587111 |
| GO:0009793                            | embryonic development ending in seed dormancy | 1                                          | 14                    | 0.1573007   |
| GO:0009570                            | chloroplast stroma                            | 1                                          | 14                    | 0.190329855 |
| GO:0009941                            | chloroplast envelope                          | 1                                          | 14                    | 0.196922836 |

#### Cluster 48

| GO Identifier | #Loci | Associated Loci (Left to Right) |           |           |           |           |
|---------------|-------|---------------------------------|-----------|-----------|-----------|-----------|
| GO:0000059    | 1     | AT2G46520                       |           |           |           |           |
| GO:0003735    | 3     | AT3G13580                       | AT3G25520 | AT5G16130 |           |           |
| GO:0003876    | 1     | AT2G38280                       |           |           |           |           |
| GO:0003899    | 1     | AT1G29940                       |           |           |           |           |
| GO:0004647    | 1     | AT1G18640                       |           |           |           |           |
| GO:0004751    | 1     | AT3G04790                       |           |           |           |           |
| GO:0004766    | 1     | AT1G70310                       |           |           |           |           |
| GO:0005337    | 1     | AT1G20840                       |           |           |           |           |
| GO:0005351    | 1     | AT1G20840                       |           |           |           |           |
| GO:0005634    | 3     | AT1G29940                       | AT2G46520 | AT3G25520 |           |           |
| GO:0005643    | 1     | AT2G46520                       |           |           |           |           |
| GO:0005730    | 2     | AT3G25520                       | AT5G16130 |           |           |           |
| GO:0005737    | 2     | AT2G46520                       | AT3G25520 |           |           |           |
| GO:0005773    | 2     | AT1G20840                       | AT3G25520 |           |           |           |
| GO:0005792    | 1     | AT2G38280                       |           |           |           |           |
| GO:0005840    | 1     | AT3G25520                       |           |           |           |           |
| GO:0005886    | 4     | AT1G20840                       | AT1G70310 | AT3G25520 | AT5G16130 |           |
| GO:0006350    | 1     | AT1G29940                       |           |           |           |           |
| GO:0006412    | 3     | AT3G13580                       | AT3G25520 | AT5G16130 |           |           |
| GO:0006564    | 1     | AT1G18640                       |           |           |           |           |
| GO:0006913    | 1     | AT3G25520                       |           |           |           |           |
| GO:0008097    | 1     | AT3G25520                       |           |           |           |           |
| GO:0008295    | 1     | AT1G70310                       |           |           |           |           |
| GO:0008565    | 1     | AT2G46520                       |           |           |           |           |
| GO:0009168    | 1     | AT2G38280                       |           |           |           |           |
| GO:0009507    | 4     | AT1G18640                       | AT3G04790 | AT3G13580 | AT3G25520 |           |
| GO:0009535    | 1     | AT3G04790                       |           |           |           |           |
| GO:0009570    | 1     | AT3G04790                       |           |           |           |           |
| GO:0009579    | 1     | AT3G04790                       |           |           |           |           |
| GO:0009624    | 1     | AT1G20840                       |           |           |           |           |
| GO:0009705    | 1     | AT1G20840                       |           |           |           |           |
| GO:0009750    | 1     | AT1G20840                       |           |           |           |           |
| GO:0009793    | 1     | AT2G38280                       |           |           |           |           |
| GO:0009941    | 1     | AT3G04790                       |           |           |           |           |
| GO:0009955    | 1     | AT3G25520                       |           |           |           |           |
| GO:0015144    | 1     | AT1G20840                       |           |           |           |           |
| GO:0015934    | 1     | AT3G13580                       |           |           |           |           |
| GO:0016020    | 5     | AT1G20840                       | AT2G46520 | AT3G13580 | AT3G25520 | AT5G16130 |
| GO:0019253    | 1     | AT3G04790                       |           |           |           |           |
| GO:0022625    | 2     | AT3G13580                       | AT3G25520 |           |           |           |
| GO:0022626    | 3     | AT3G13580                       | AT3G25520 | AT5G16130 |           |           |
| GO:0022627    | 1     | AT5G16130                       |           |           |           |           |
| GO:0042254    | 1     | AT3G25520                       |           |           |           |           |
| GO:0042742    | 1     | AT3G04790                       |           |           |           |           |

### Cluster 49

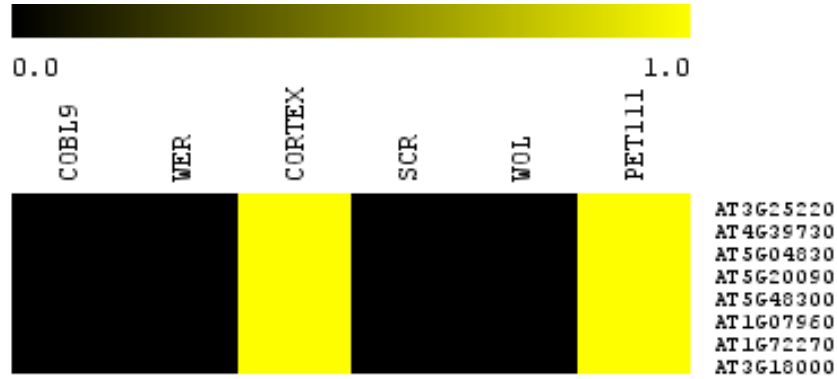

### Cluster 49

AT1G07960  
 AT1G72270  
 AT3G18000  
 AT3G25220  
 AT4G39730  
 AT5G04830  
 AT5G20090  
 AT5G48300

| Cluster 49<br>GO identifier | Description                                      | #<br>Associated<br>to the GO<br>in Cluster | Total # in<br>Cluster | p-value     |
|-----------------------------|--------------------------------------------------|--------------------------------------------|-----------------------|-------------|
| GO:0030931                  | heterotetrameric ADPG pyrophosphorylase complex  | 1                                          | 8                     | 3.84E-04    |
| GO:0008878                  | glucose-1-phosphate adenylyltransferase activity | 1                                          | 8                     | 0.002297746 |
| GO:0019252                  | starch biosynthetic process                      | 1                                          | 8                     | 0.003824435 |
| GO:0005528                  | FK506 binding                                    | 1                                          | 8                     | 0.008379906 |
| GO:0048573                  | photoperiodism, flowering                        | 1                                          | 8                     | 0.009513024 |
| GO:0045454                  | cell redox homeostasis                           | 1                                          | 8                     | 0.017380792 |
| GO:0003755                  | peptidyl-prolyl cis-trans isomerase activity     | 1                                          | 8                     | 0.020348685 |
| GO:0005739                  | mitochondrion                                    | 2                                          | 8                     | 0.03036572  |
| GO:0009579                  | thylakoid                                        | 1                                          | 8                     | 0.061601067 |
| GO:0006457                  | protein folding                                  | 1                                          | 8                     | 0.073074808 |
| GO:0048046                  | apoplast                                         | 1                                          | 8                     | 0.085251506 |
| GO:0009535                  | chloroplast thylakoid membrane                   | 1                                          | 8                     | 0.087519342 |
| GO:0005783                  | endoplasmic reticulum                            | 1                                          | 8                     | 0.092979863 |
| GO:0005886                  | plasma membrane                                  | 2                                          | 8                     | 0.1087124   |
| GO:0009570                  | chloroplast stroma                               | 1                                          | 8                     | 0.120496729 |
| GO:0005773                  | vacuole                                          | 1                                          | 8                     | 0.146267346 |
| GO:0012505                  | endomembrane system                              | 2                                          | 8                     | 0.169035632 |
| GO:0009507                  | chloroplast                                      | 2                                          | 8                     | 0.172530362 |
| GO:0008150                  | biological_process                               | 3                                          | 8                     | 0.263338367 |
| GO:0016020                  | membrane                                         | 1                                          | 8                     | 0.322377166 |

### Cluster 49

| GO Identifier | #Loci | Associated Loci (Left to Right) |
|---------------|-------|---------------------------------|
| GO:0003755    | 1     | AT3G25220                       |
| GO:0005528    | 1     | AT3G25220                       |
| GO:0005739    | 2     | AT1G72270 AT5G20090             |
| GO:0005773    | 1     | AT4G39730                       |
| GO:0005783    | 1     | AT3G25220                       |
| GO:0005886    | 2     | AT4G39730 AT5G20090             |
| GO:0006457    | 1     | AT3G25220                       |
| GO:0008150    | 3     | AT4G39730 AT5G04830 AT5G20090   |

**Cluster 49 (con.)**

| <b>GO Identifier</b> | <b>#Loci</b> | <b>Associated Loci (Left to Right)</b> |
|----------------------|--------------|----------------------------------------|
| GO:0008878           | 1            | AT5G48300                              |
| GO:0009507           | 2            | AT4G39730 AT5G48300                    |
| GO:0009535           | 1            | AT4G39730                              |
| GO:0009570           | 1            | AT5G48300                              |
| GO:0009579           | 1            | AT4G39730                              |
| GO:0012505           | 2            | AT1G07960 AT3G25220                    |
| GO:0016020           | 1            | AT5G20090                              |
| GO:0019252           | 1            | AT5G48300                              |
| GO:0030931           | 1            | AT5G48300                              |
| GO:0045454           | 1            | AT1G07960                              |
| GO:0048046           | 1            | AT5G48300                              |
| GO:0048573           | 1            | AT5G48300                              |

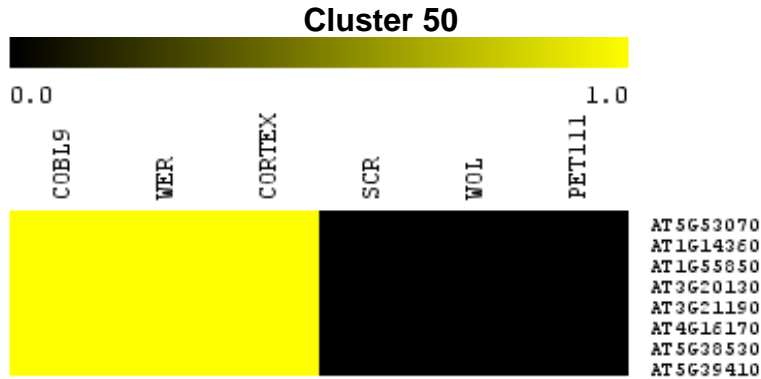

**Cluster 50**  
 AT1G14360  
 AT1G55850  
 AT3G20130  
 AT3G21190  
 AT4G16170  
 AT5G38530  
 AT5G39410  
 AT5G53070

| Cluster 50<br>GO identifier | Description                                                    | #<br>Associated<br>to the GO<br>in Cluster | Total # in<br>Cluster | p-value     |
|-----------------------------|----------------------------------------------------------------|--------------------------------------------|-----------------------|-------------|
| GO:0015165                  | pyrimidine nucleotide sugar transmembrane transporter activity | 1                                          | 8                     | 7.67E-04    |
| GO:0004834                  | tryptophan synthase activity                                   | 1                                          | 8                     | 0.001150031 |
| GO:0005783                  | endoplasmic reticulum                                          | 2                                          | 8                     | 0.004173795 |
| GO:0000271                  | polysaccharide biosynthetic process                            | 1                                          | 8                     | 0.00648627  |
| GO:0000162                  | tryptophan biosynthetic process                                | 1                                          | 8                     | 0.007244491 |
| GO:0009832                  | plant-type cell wall biogenesis                                | 1                                          | 8                     | 0.009135573 |
| GO:0016759                  | cellulose synthase activity                                    | 1                                          | 8                     | 0.013273535 |
| GO:0042254                  | ribosome biogenesis                                            | 1                                          | 8                     | 0.034587528 |
| GO:0005794                  | Golgi apparatus                                                | 1                                          | 8                     | 0.047045342 |
| GO:0005840                  | ribosome                                                       | 1                                          | 8                     | 0.066358807 |
| GO:0019825                  | oxygen binding                                                 | 1                                          | 8                     | 0.069056573 |
| GO:0003735                  | structural constituent of ribosome                             | 1                                          | 8                     | 0.099004369 |
| GO:0006412                  | translation                                                    | 1                                          | 8                     | 0.102766969 |
| GO:0016757                  | transferase activity, transferring glycosyl groups             | 1                                          | 8                     | 0.103079046 |
| GO:0005886                  | plasma membrane                                                | 2                                          | 8                     | 0.1087124   |
| GO:0003824                  | catalytic activity                                             | 1                                          | 8                     | 0.125256373 |

| Cluster 50<br>GO identifier<br>(con.) | Description          | #<br>Associated<br>to the GO<br>in Cluster | Total # in<br>Cluster | p-value     |
|---------------------------------------|----------------------|--------------------------------------------|-----------------------|-------------|
| GO:0009941                            | chloroplast envelope | 1                                          | 8                     | 0.125256373 |
| GO:0005488                            | binding              | 1                                          | 8                     | 0.146267346 |
| GO:0005773                            | vacuole              | 1                                          | 8                     | 0.146267346 |
| GO:0012505                            | endomembrane system  | 2                                          | 8                     | 0.169035632 |
| GO:0008152                            | metabolic process    | 1                                          | 8                     | 0.177092172 |
| GO:0005739                            | mitochondrion        | 1                                          | 8                     | 0.22683916  |
| GO:0016020                            | membrane             | 1                                          | 8                     | 0.322377166 |

### Cluster 50

#### GO Identifier #Loci Associated Loci (Left to Right)

|            |   |           |           |
|------------|---|-----------|-----------|
| GO:0000162 | 1 | AT5G38530 |           |
| GO:0000271 | 1 | AT1G55850 |           |
| GO:0003735 | 1 | AT5G53070 |           |
| GO:0003824 | 1 | AT5G39410 |           |
| GO:0004834 | 1 | AT5G38530 |           |
| GO:0005488 | 1 | AT5G39410 |           |
| GO:0005739 | 1 | AT5G39410 |           |
| GO:0005773 | 1 | AT5G39410 |           |
| GO:0005783 | 2 | AT1G55850 | AT4G16170 |
| GO:0005794 | 1 | AT3G21190 |           |
| GO:0005840 | 1 | AT5G53070 |           |
| GO:0005886 | 2 | AT1G55850 | AT5G39410 |
| GO:0006412 | 1 | AT5G53070 |           |
| GO:0008152 | 1 | AT5G39410 |           |
| GO:0009832 | 1 | AT1G55850 |           |
| GO:0009941 | 1 | AT5G39410 |           |
| GO:0012505 | 2 | AT1G14360 | AT3G20130 |
| GO:0015165 | 1 | AT1G14360 |           |
| GO:0016020 | 1 | AT5G39410 |           |
| GO:0016757 | 1 | AT1G55850 |           |
| GO:0016759 | 1 | AT1G55850 |           |
| GO:0019825 | 1 | AT3G20130 |           |
| GO:0042254 | 1 | AT5G53070 |           |

### Cluster 51

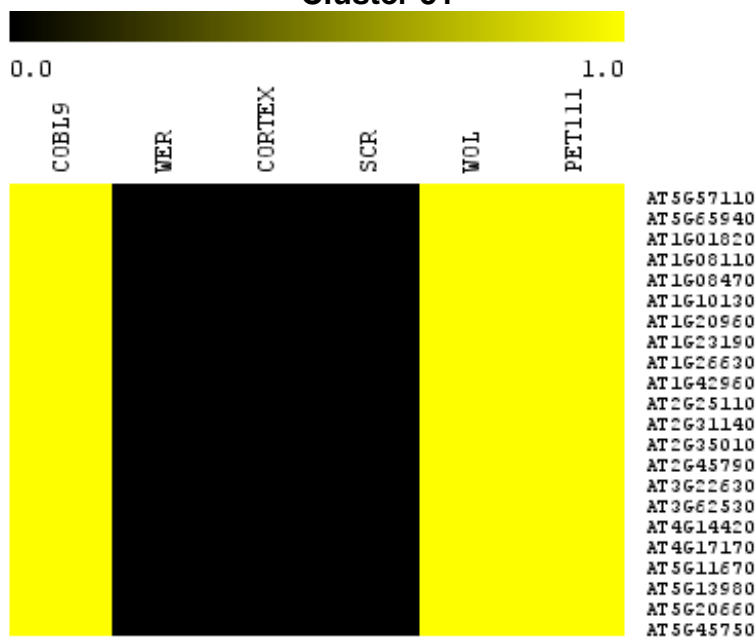

**Cluster 51**

AT1G01820  
 AT1G08110  
 AT1G08470  
 AT1G10130  
 AT1G20960  
 AT1G23190  
 AT1G26630  
 AT1G42960  
 AT2G25110  
 AT2G31140  
 AT2G35010  
 AT2G45790  
 AT3G22630  
 AT3G62530  
 AT4G14420  
 AT4G17170  
 AT5G11670  
 AT5G13980  
 AT5G20660  
 AT5G45750  
 AT5G57110  
 AT5G65940

| Cluster 51<br>GO identifier | Description                                                             | #<br>Associated<br>to the GO<br>in Cluster | Total # in<br>Cluster | p-value     |
|-----------------------------|-------------------------------------------------------------------------|--------------------------------------------|-----------------------|-------------|
| GO:0005388                  | calcium-transporting ATPase activity                                    | 2                                          | 22                    | 8.20E-05    |
| GO:0005886                  | plasma membrane                                                         | 8                                          | 22                    | 1.66E-04    |
| GO:0046686                  | response to cadmium ion                                                 | 4                                          | 22                    | 1.78E-04    |
| GO:0005516                  | calmodulin binding                                                      | 3                                          | 22                    | 4.91E-04    |
| GO:0005773                  | vacuole                                                                 | 4                                          | 22                    | 0.001001851 |
| GO:0008233                  | peptidase activity                                                      | 2                                          | 22                    | 0.001053969 |
| GO:0004615                  | phosphomannomutase activity                                             | 1                                          | 22                    | 0.001054903 |
| GO:0015410                  | manganese-transporting ATPase activity                                  | 1                                          | 22                    | 0.001054903 |
| GO:0019307                  | mannose biosynthetic process                                            | 1                                          | 22                    | 0.001054903 |
| GO:0034050                  | host programmed cell death induced by symbiont                          | 1                                          | 22                    | 0.001054903 |
| GO:0043621                  | protein self-association                                                | 1                                          | 22                    | 0.001054903 |
| GO:0055071                  | manganese ion homeostasis                                               | 1                                          | 22                    | 0.001054903 |
| GO:0016020                  | membrane                                                                | 6                                          | 22                    | 0.00177015  |
| GO:0048046                  | apoplast                                                                | 3                                          | 22                    | 0.001887184 |
| GO:0006574                  | valine catabolic process                                                | 1                                          | 22                    | 0.002107681 |
| GO:0005783                  | endoplasmic reticulum                                                   | 3                                          | 22                    | 0.00245684  |
| GO:0004614                  | phosphoglucomutase activity                                             | 1                                          | 22                    | 0.003158338 |
| GO:0006013                  | mannose metabolic process                                               | 1                                          | 22                    | 0.003158338 |
| GO:0005975                  | carbohydrate metabolic process                                          | 3                                          | 22                    | 0.003393081 |
| GO:0003860                  | 3-hydroxyisobutyryl-CoA hydrolase activity                              | 1                                          | 22                    | 0.004206876 |
| GO:0004473                  | malate dehydrogenase (oxaloacetate-decarboxylating)<br>(NADP+) activity | 1                                          | 22                    | 0.004206876 |
| GO:0005779                  | integral to peroxisomal membrane                                        | 1                                          | 22                    | 0.004206876 |
| GO:0004470                  | malic enzyme activity                                                   | 1                                          | 22                    | 0.00629761  |
| GO:0006828                  | manganese ion transport                                                 | 1                                          | 22                    | 0.00629761  |



| Cluster 51<br>GO identifier<br>(con.) | Description                                                               | #<br>Associated<br>to the GO<br>in Cluster | Total # in<br>Cluster | p-value     |
|---------------------------------------|---------------------------------------------------------------------------|--------------------------------------------|-----------------------|-------------|
| GO:0016652                            | oxidoreductase activity, acting on NADH or NADPH, NAD or NADP as acceptor | 1                                          | 22                    | 0.00629761  |
| GO:0004462                            | lactoylglutathione lyase activity                                         | 1                                          | 22                    | 0.007339811 |
| GO:0004559                            | alpha-mannosidase activity                                                | 1                                          | 22                    | 0.007339811 |
| GO:0009051                            | pentose-phosphate shunt, oxidative branch                                 | 1                                          | 22                    | 0.008379906 |
| GO:0016559                            | peroxisome fission                                                        | 1                                          | 22                    | 0.009417898 |
| GO:0006108                            | malate metabolic process                                                  | 1                                          | 22                    | 0.010453789 |
| GO:0012501                            | programmed cell death                                                     | 1                                          | 22                    | 0.010453789 |
| GO:0019853                            | L-ascorbic acid biosynthetic process                                      | 1                                          | 22                    | 0.010453789 |
| GO:0048235                            | pollen sperm cell differentiation                                         | 1                                          | 22                    | 0.010453789 |
| GO:0009821                            | alkaloid biosynthetic process                                             | 1                                          | 22                    | 0.012519283 |
| GO:0005525                            | GTP binding                                                               | 2                                          | 22                    | 0.013690093 |
| GO:0006816                            | calcium ion transport                                                     | 1                                          | 22                    | 0.014576413 |
| GO:0007031                            | peroxisome organization                                                   | 1                                          | 22                    | 0.014576413 |
| GO:0016844                            | strictosidine synthase activity                                           | 1                                          | 22                    | 0.014576413 |
| GO:0005778                            | peroxisomal membrane                                                      | 1                                          | 22                    | 0.017646477 |
| GO:0006888                            | ER to Golgi vesicle-mediated transport                                    | 1                                          | 22                    | 0.018665675 |
| GO:0005839                            | proteasome core complex                                                   | 1                                          | 22                    | 0.020697855 |
| GO:0016049                            | cell growth                                                               | 1                                          | 22                    | 0.023730629 |
| GO:0006635                            | fatty acid beta-oxidation                                                 | 1                                          | 22                    | 0.024737434 |
| GO:0009706                            | chloroplast inner membrane                                                | 1                                          | 22                    | 0.031727685 |
| GO:0003924                            | GTPase activity                                                           | 1                                          | 22                    | 0.03469293  |
| GO:0005618                            | cell wall                                                                 | 2                                          | 22                    | 0.036334146 |
| GO:0045454                            | cell redox homeostasis                                                    | 1                                          | 22                    | 0.046372394 |
| GO:0009624                            | response to nematode                                                      | 1                                          | 22                    | 0.052104316 |
| GO:0009617                            | response to bacterium                                                     | 1                                          | 22                    | 0.053999139 |
| GO:0006413                            | translational initiation                                                  | 1                                          | 22                    | 0.054943598 |
| GO:0007264                            | small GTPase mediated signal transduction                                 | 1                                          | 22                    | 0.061499957 |
| GO:0005737                            | cytoplasm                                                                 | 2                                          | 22                    | 0.063278834 |
| GO:0004601                            | peroxidase activity                                                       | 1                                          | 22                    | 0.065203599 |
| GO:0008026                            | ATP-dependent helicase activity                                           | 1                                          | 22                    | 0.067043809 |
| GO:0048364                            | root development                                                          | 1                                          | 22                    | 0.067043809 |
| GO:0003743                            | translation initiation factor activity                                    | 1                                          | 22                    | 0.068876307 |
| GO:0015031                            | protein transport                                                         | 1                                          | 22                    | 0.080601132 |
| GO:0009611                            | response to wounding                                                      | 1                                          | 22                    | 0.101414062 |
| GO:0005794                            | Golgi apparatus                                                           | 1                                          | 22                    | 0.118763854 |
| GO:0009536                            | plastid                                                                   | 1                                          | 22                    | 0.120375241 |
| GO:0042742                            | defense response to bacterium                                             | 1                                          | 22                    | 0.12357692  |
| GO:0009507                            | chloroplast                                                               | 4                                          | 22                    | 0.136040364 |
| GO:0006511                            | ubiquitin-dependent protein catabolic process                             | 1                                          | 22                    | 0.165536173 |
| GO:0009733                            | response to auxin stimulus                                                | 1                                          | 22                    | 0.187219799 |
| GO:0005730                            | nucleolus                                                                 | 1                                          | 22                    | 0.197468248 |
| GO:0009505                            | plant-type cell wall                                                      | 1                                          | 22                    | 0.197468248 |
| GO:0009535                            | chloroplast thylakoid membrane                                            | 1                                          | 22                    | 0.203678483 |
| GO:0009793                            | embryonic development ending in seed dormancy                             | 1                                          | 22                    | 0.222003993 |
| GO:0009651                            | response to salt stress                                                   | 1                                          | 22                    | 0.227624368 |
| GO:0006508                            | proteolysis                                                               | 1                                          | 22                    | 0.252714118 |
| GO:0009941                            | chloroplast envelope                                                      | 1                                          | 22                    | 0.268234084 |
| GO:0005634                            | nucleus                                                                   | 2                                          | 22                    | 0.280653136 |
| GO:0006355                            | regulation of transcription, DNA-dependent                                | 1                                          | 22                    | 0.361987516 |
| GO:0005739                            | mitochondrion                                                             | 1                                          | 22                    | 0.368771516 |

**Cluster 51**

| <u>GO Identifier</u> | <u>#Loci</u> | <u>Associated Loci (Left to Right)</u> |           |           |           |           |           |
|----------------------|--------------|----------------------------------------|-----------|-----------|-----------|-----------|-----------|
| GO:0003743           | 1            | AT1G26630                              |           |           |           |           |           |
| GO:0003860           | 1            | AT5G65940                              |           |           |           |           |           |
| GO:0003924           | 1            | AT4G17170                              |           |           |           |           |           |
| GO:0004462           | 1            | AT1G08110                              |           |           |           |           |           |
| GO:0004470           | 1            | AT5G11670                              |           |           |           |           |           |
| GO:0004473           | 1            | AT5G11670                              |           |           |           |           |           |
| GO:0004559           | 1            | AT5G13980                              |           |           |           |           |           |
| GO:0004601           | 1            | AT1G10130                              |           |           |           |           |           |
| GO:0004614           | 1            | AT1G23190                              |           |           |           |           |           |
| GO:0004615           | 1            | AT2G45790                              |           |           |           |           |           |
| GO:0005388           | 2            | AT1G10130                              | AT5G57110 |           |           |           |           |
| GO:0005516           | 3            | AT1G08110                              | AT1G10130 | AT5G57110 |           |           |           |
| GO:0005525           | 2            | AT4G17170                              | AT5G45750 |           |           |           |           |
| GO:0005618           | 2            | AT5G11670                              | AT5G13980 |           |           |           |           |
| GO:0005634           | 2            | AT1G26630                              | AT5G45750 |           |           |           |           |
| GO:0005730           | 1            | AT1G20960                              |           |           |           |           |           |
| GO:0005737           | 2            | AT1G23190                              | AT2G45790 |           |           |           |           |
| GO:0005739           | 1            | AT1G42960                              |           |           |           |           |           |
| GO:0005773           | 4            | AT3G22630                              | AT4G17170 | AT5G13980 | AT5G45750 |           |           |
| GO:0005778           | 1            | AT1G01820                              |           |           |           |           |           |
| GO:0005779           | 1            | AT1G01820                              |           |           |           |           |           |
| GO:0005783           | 3            | AT1G08470                              | AT2G25110 | AT4G14420 |           |           |           |
| GO:0005794           | 1            | AT1G10130                              |           |           |           |           |           |
| GO:0005839           | 1            | AT3G22630                              |           |           |           |           |           |
| GO:0005886           | 8            | AT1G08470                              | AT1G23190 | AT3G22630 | AT4G17170 | AT5G11670 | AT5G13980 |
|                      |              | AT5G45750                              | AT5G57110 |           |           |           |           |
| GO:0005975           | 3            | AT1G08110                              | AT1G23190 | AT5G13980 |           |           |           |
| GO:0006013           | 1            | AT5G13980                              |           |           |           |           |           |
| GO:0006108           | 1            | AT5G11670                              |           |           |           |           |           |
| GO:0006355           | 1            | AT5G45750                              |           |           |           |           |           |
| GO:0006413           | 1            | AT1G26630                              |           |           |           |           |           |
| GO:0006508           | 1            | AT5G20660                              |           |           |           |           |           |
| GO:0006511           | 1            | AT3G22630                              |           |           |           |           |           |
| GO:0006574           | 1            | AT5G65940                              |           |           |           |           |           |
| GO:0006635           | 1            | AT5G65940                              |           |           |           |           |           |
| GO:0006816           | 1            | AT1G10130                              |           |           |           |           |           |
| GO:0006828           | 1            | AT1G10130                              |           |           |           |           |           |
| GO:0006888           | 1            | AT4G17170                              |           |           |           |           |           |
| GO:0007031           | 1            | AT1G01820                              |           |           |           |           |           |
| GO:0007264           | 1            | AT5G45750                              |           |           |           |           |           |
| GO:0008026           | 1            | AT1G20960                              |           |           |           |           |           |
| GO:0008233           | 2            | AT3G22630                              | AT5G20660 |           |           |           |           |
| GO:0009051           | 1            | AT5G11670                              |           |           |           |           |           |
| GO:0009505           | 1            | AT5G13980                              |           |           |           |           |           |
| GO:0009507           | 4            | AT1G08110                              | AT1G23190 | AT1G42960 | AT5G11670 |           |           |
| GO:0009535           | 1            | AT1G42960                              |           |           |           |           |           |
| GO:0009536           | 1            | AT1G42960                              |           |           |           |           |           |
| GO:0009611           | 1            | AT1G26630                              |           |           |           |           |           |
| GO:0009617           | 1            | AT1G26630                              |           |           |           |           |           |
| GO:0009624           | 1            | AT5G57110                              |           |           |           |           |           |
| GO:0009651           | 1            | AT2G45790                              |           |           |           |           |           |
| GO:0009706           | 1            | AT1G42960                              |           |           |           |           |           |
| GO:0009733           | 1            | AT5G65940                              |           |           |           |           |           |
| GO:0009793           | 1            | AT1G20960                              |           |           |           |           |           |
| GO:0009821           | 1            | AT1G08470                              |           |           |           |           |           |
| GO:0009941           | 1            | AT1G42960                              |           |           |           |           |           |
| GO:0012501           | 1            | AT1G26630                              |           |           |           |           |           |
| GO:0015031           | 1            | AT5G45750                              |           |           |           |           |           |
| GO:0015410           | 1            | AT1G10130                              |           |           |           |           |           |

**Cluster 51 (con.)**

| <b>GO Identifier</b> | <b>#Loci</b> | <b>Associated Loci (Left to Right)</b> |           |           |           |           |           |
|----------------------|--------------|----------------------------------------|-----------|-----------|-----------|-----------|-----------|
| GO:0016020           | 6            | AT1G20960                              | AT1G42960 | AT2G25110 | AT4G17170 | AT5G11670 | AT5G57110 |
| GO:0016049           | 1            | AT4G17170                              |           |           |           |           |           |
| GO:0016559           | 1            | AT1G01820                              |           |           |           |           |           |
| GO:0016652           | 1            | AT5G11670                              |           |           |           |           |           |
| GO:0016844           | 1            | AT1G08470                              |           |           |           |           |           |
| GO:0019307           | 1            | AT2G45790                              |           |           |           |           |           |
| GO:0019853           | 1            | AT2G45790                              |           |           |           |           |           |
| GO:0034050           | 1            | AT1G26630                              |           |           |           |           |           |
| GO:0042742           | 1            | AT1G26630                              |           |           |           |           |           |
| GO:0043621           | 1            | AT5G57110                              |           |           |           |           |           |
| GO:0045454           | 1            | AT2G35010                              |           |           |           |           |           |
| GO:0046686           | 4            | AT1G08110                              | AT1G23190 | AT1G26630 | AT5G11670 |           |           |
| GO:0048046           | 3            | AT3G22630                              | AT5G11670 | AT5G13980 |           |           |           |
| GO:0048235           | 1            | AT4G17170                              |           |           |           |           |           |
| GO:0048364           | 1            | AT1G10130                              |           |           |           |           |           |
| GO:0055071           | 1            | AT1G10130                              |           |           |           |           |           |

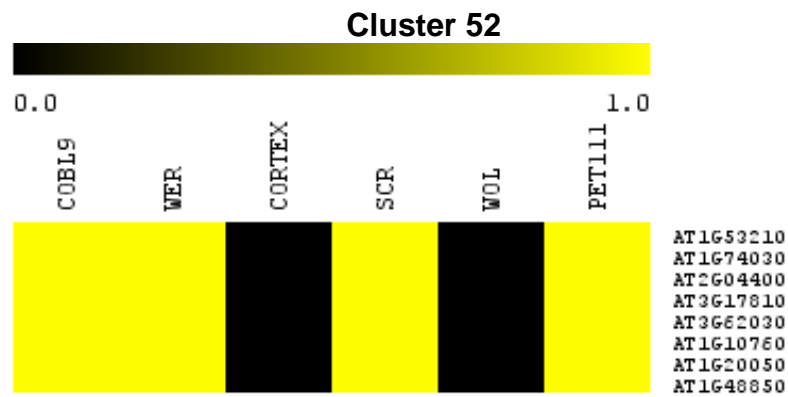

**Cluster 52**

AT1G10760  
 AT1G20050  
 AT1G48850  
 AT1G53210  
 AT1G74030  
 AT2G04400  
 AT3G17810  
 AT3G62030

| Cluster 52<br>GO identifier | Description                                    | #<br>Associated<br>to the GO<br>in Cluster | Total # in<br>Cluster | p-value     |
|-----------------------------|------------------------------------------------|--------------------------------------------|-----------------------|-------------|
| GO:0009507                  | chloroplast                                    | 6                                          | 8                     | 4.37E-05    |
| GO:0000247                  | C-8 sterol isomerase activity                  | 1                                          | 8                     | 3.84E-04    |
| GO:0004107                  | chorismate synthase activity                   | 1                                          | 8                     | 3.84E-04    |
| GO:0019595                  | non-phosphorylated glucose catabolic process   | 1                                          | 8                     | 3.84E-04    |
| GO:0050521                  | alpha-glucan, water dikinase activity          | 1                                          | 8                     | 3.84E-04    |
| GO:0000015                  | phosphopyruvate hydratase complex              | 1                                          | 8                     | 7.67E-04    |
| GO:0004425                  | indole-3-glycerol-phosphate synthase activity  | 1                                          | 8                     | 7.67E-04    |
| GO:0019496                  | serine-isocitrate lyase pathway                | 1                                          | 8                     | 7.67E-04    |
| GO:0004634                  | phosphopyruvate hydratase activity             | 1                                          | 8                     | 0.001150031 |
| GO:0010353                  | response to trehalose stimulus                 | 1                                          | 8                     | 0.001150031 |
| GO:0006207                  | 'de novo' pyrimidine base biosynthetic process | 1                                          | 8                     | 0.00153286  |

| Cluster 52<br>GO identifier<br>(con.) | Description                                                  | #<br>Associated<br>to the GO<br>in Cluster | Total # in<br>Cluster | p-value     |
|---------------------------------------|--------------------------------------------------------------|--------------------------------------------|-----------------------|-------------|
| GO:0010555                            | response to mannitol stimulus                                | 1                                          | 8                     | 0.00153286  |
| GO:0019564                            | aerobic glycerol catabolic process                           | 1                                          | 8                     | 0.00153286  |
| GO:0019642                            | anaerobic glycolysis                                         | 1                                          | 8                     | 0.00153286  |
| GO:0019683                            | glyceraldehyde-3-phosphate catabolic process                 | 1                                          | 8                     | 0.00153286  |
| GO:0019656                            | glucose catabolic process to D-lactate and ethanol           | 1                                          | 8                     | 0.001915431 |
| GO:0009642                            | response to light intensity                                  | 1                                          | 8                     | 0.002297746 |
| GO:0019650                            | glucose catabolic process to butanediol                      | 1                                          | 8                     | 0.002297746 |
| GO:0009610                            | response to symbiotic fungus                                 | 1                                          | 8                     | 0.002679803 |
| GO:0019658                            | glucose catabolic process to lactate and acetate             | 1                                          | 8                     | 0.003061604 |
| GO:0006094                            | gluconeogenesis                                              | 1                                          | 8                     | 0.003443148 |
| GO:0016627                            | oxidoreductase activity, acting on the CH-CH group of donors | 1                                          | 8                     | 0.003824435 |
| GO:0019344                            | cysteine biosynthetic process                                | 1                                          | 8                     | 0.003824435 |
| GO:0009061                            | anaerobic respiration                                        | 1                                          | 8                     | 0.004205466 |
| GO:0019654                            | acetate fermentation                                         | 1                                          | 8                     | 0.00458624  |
| GO:0005983                            | starch catabolic process                                     | 1                                          | 8                     | 0.004966759 |
| GO:0009073                            | aromatic amino acid family biosynthetic process              | 1                                          | 8                     | 0.004966759 |
| GO:0009631                            | cold acclimation                                             | 1                                          | 8                     | 0.006865508 |
| GO:0000162                            | tryptophan biosynthetic process                              | 1                                          | 8                     | 0.007244491 |
| GO:0009570                            | chloroplast stroma                                           | 2                                          | 8                     | 0.007263904 |
| GO:0009941                            | chloroplast envelope                                         | 2                                          | 8                     | 0.007899243 |
| GO:0016126                            | sterol biosynthetic process                                  | 1                                          | 8                     | 0.008379906 |
| GO:0000325                            | plant-type vacuole                                           | 1                                          | 8                     | 0.010643849 |
| GO:0005774                            | vacuolar membrane                                            | 1                                          | 8                     | 0.015144268 |
| GO:0006096                            | glycolysis                                                   | 1                                          | 8                     | 0.016263668 |
| GO:0031977                            | thylakoid lumen                                              | 1                                          | 8                     | 0.01700867  |
| GO:0003755                            | peptidyl-prolyl cis-trans isomerase activity                 | 1                                          | 8                     | 0.020348685 |
| GO:0042742                            | defense response to bacterium                                | 1                                          | 8                     | 0.049150866 |
| GO:0005509                            | calcium ion binding                                          | 1                                          | 8                     | 0.058173989 |
| GO:0022626                            | cytosolic ribosome                                           | 1                                          | 8                     | 0.06057546  |
| GO:0009579                            | thylakoid                                                    | 1                                          | 8                     | 0.061601067 |
| GO:0006979                            | response to oxidative stress                                 | 1                                          | 8                     | 0.069056573 |
| GO:0006457                            | protein folding                                              | 1                                          | 8                     | 0.073074808 |
| GO:0009737                            | response to abscisic acid stimulus                           | 1                                          | 8                     | 0.073408126 |
| GO:0007165                            | signal transduction                                          | 1                                          | 8                     | 0.081664797 |
| GO:0005730                            | nucleolus                                                    | 1                                          | 8                     | 0.084276101 |
| GO:0048046                            | apoplast                                                     | 1                                          | 8                     | 0.085251506 |
| GO:0009535                            | chloroplast thylakoid membrane                               | 1                                          | 8                     | 0.087519342 |
| GO:0009793                            | embryonic development ending in seed dormancy                | 1                                          | 8                     | 0.097426962 |
| GO:0009651                            | response to salt stress                                      | 1                                          | 8                     | 0.100576089 |
| GO:0005886                            | plasma membrane                                              | 2                                          | 8                     | 0.1087124   |
| GO:0005773                            | vacuole                                                      | 1                                          | 8                     | 0.146267346 |
| GO:0005739                            | mitochondrion                                                | 1                                          | 8                     | 0.22683916  |
| GO:0016020                            | membrane                                                     | 1                                          | 8                     | 0.322377166 |

### Cluster 52

#### GO Identifier   #Loci   Associated Loci (Left to Right)

|            |   |           |
|------------|---|-----------|
| GO:0000015 | 1 | AT1G74030 |
| GO:0000162 | 1 | AT2G04400 |
| GO:0000247 | 1 | AT1G20050 |
| GO:0000325 | 1 | AT1G53210 |
| GO:0003755 | 1 | AT3G62030 |
| GO:0004107 | 1 | AT1G48850 |
| GO:0004425 | 1 | AT2G04400 |

**Cluster 52 (con.)**

| <u>GO Identifier</u> | <u>#Loci</u> | <u>Associated Loci (Left to Right)</u> |           |           |           |           |           |
|----------------------|--------------|----------------------------------------|-----------|-----------|-----------|-----------|-----------|
| GO:0004634           | 1            | AT1G74030                              |           |           |           |           |           |
| GO:0005509           | 1            | AT1G53210                              |           |           |           |           |           |
| GO:0005730           | 1            | AT1G48850                              |           |           |           |           |           |
| GO:0005739           | 1            | AT1G10760                              |           |           |           |           |           |
| GO:0005773           | 1            | AT1G53210                              |           |           |           |           |           |
| GO:0005774           | 1            | AT1G53210                              |           |           |           |           |           |
| GO:0005886           | 2            | AT1G20050                              | AT1G53210 |           |           |           |           |
| GO:0005983           | 1            | AT1G10760                              |           |           |           |           |           |
| GO:0006094           | 1            | AT1G74030                              |           |           |           |           |           |
| GO:0006096           | 1            | AT1G74030                              |           |           |           |           |           |
| GO:0006207           | 1            | AT3G17810                              |           |           |           |           |           |
| GO:0006457           | 1            | AT3G62030                              |           |           |           |           |           |
| GO:0006979           | 1            | AT3G62030                              |           |           |           |           |           |
| GO:0007165           | 1            | AT3G62030                              |           |           |           |           |           |
| GO:0009061           | 1            | AT1G74030                              |           |           |           |           |           |
| GO:0009073           | 1            | AT1G48850                              |           |           |           |           |           |
| GO:0009507           | 6            | AT1G10760                              | AT1G48850 | AT1G74030 | AT2G04400 | AT3G17810 | AT3G62030 |
| GO:0009535           | 1            | AT3G62030                              |           |           |           |           |           |
| GO:0009570           | 2            | AT1G10760                              | AT3G62030 |           |           |           |           |
| GO:0009579           | 1            | AT3G62030                              |           |           |           |           |           |
| GO:0009610           | 1            | AT1G10760                              |           |           |           |           |           |
| GO:0009631           | 1            | AT1G10760                              |           |           |           |           |           |
| GO:0009642           | 1            | AT3G62030                              |           |           |           |           |           |
| GO:0009651           | 1            | AT3G62030                              |           |           |           |           |           |
| GO:0009737           | 1            | AT3G62030                              |           |           |           |           |           |
| GO:0009793           | 1            | AT1G48850                              |           |           |           |           |           |
| GO:0009941           | 2            | AT1G10760                              | AT3G62030 |           |           |           |           |
| GO:0010353           | 1            | AT1G10760                              |           |           |           |           |           |
| GO:0010555           | 1            | AT3G62030                              |           |           |           |           |           |
| GO:0016020           | 1            | AT1G53210                              |           |           |           |           |           |
| GO:0016126           | 1            | AT1G20050                              |           |           |           |           |           |
| GO:0016627           | 1            | AT3G17810                              |           |           |           |           |           |
| GO:0019344           | 1            | AT3G62030                              |           |           |           |           |           |
| GO:0019496           | 1            | AT1G74030                              |           |           |           |           |           |
| GO:0019564           | 1            | AT1G74030                              |           |           |           |           |           |
| GO:0019595           | 1            | AT1G74030                              |           |           |           |           |           |
| GO:0019642           | 1            | AT1G74030                              |           |           |           |           |           |
| GO:0019650           | 1            | AT1G74030                              |           |           |           |           |           |
| GO:0019654           | 1            | AT1G74030                              |           |           |           |           |           |
| GO:0019656           | 1            | AT1G74030                              |           |           |           |           |           |
| GO:0019658           | 1            | AT1G74030                              |           |           |           |           |           |
| GO:0019683           | 1            | AT1G74030                              |           |           |           |           |           |
| GO:0022626           | 1            | AT3G62030                              |           |           |           |           |           |
| GO:0031977           | 1            | AT3G62030                              |           |           |           |           |           |
| GO:0042742           | 1            | AT3G62030                              |           |           |           |           |           |
| GO:0048046           | 1            | AT3G62030                              |           |           |           |           |           |
| GO:0050521           | 1            | AT1G10760                              |           |           |           |           |           |

**Cluster 53**

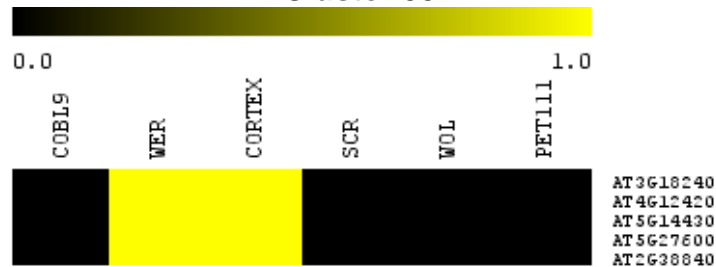

**Cluster 53**  
 AT2G38840  
 AT3G18240  
 AT4G12420  
 AT5G14430  
 AT5G27600

| Cluster 53<br>GO identifier | Description                               | #<br>Associated<br>to the GO<br>in Cluster | Total # in<br>Cluster | p-value     |
|-----------------------------|-------------------------------------------|--------------------------------------------|-----------------------|-------------|
| GO:0001676                  | long-chain fatty acid metabolic process   | 1                                          | 5                     | 9.58E-04    |
| GO:0006955                  | immune response                           | 1                                          | 5                     | 9.58E-04    |
| GO:0009505                  | plant-type cell wall                      | 2                                          | 5                     | 0.001253418 |
| GO:0004467                  | long-chain-fatty-acid-CoA ligase activity | 1                                          | 5                     | 0.001676324 |
| GO:0009932                  | cell tip growth                           | 1                                          | 5                     | 0.002154447 |
| GO:0010193                  | response to ozone                         | 1                                          | 5                     | 0.004539554 |
| GO:0003924                  | GTPase activity                           | 1                                          | 5                     | 0.008100044 |
| GO:0046658                  | anchored to plasma membrane               | 1                                          | 5                     | 0.014222925 |
| GO:0005507                  | copper ion binding                        | 1                                          | 5                     | 0.024905556 |
| GO:0005777                  | peroxisome                                | 1                                          | 5                     | 0.026055215 |
| GO:0005794                  | Golgi apparatus                           | 1                                          | 5                     | 0.029947276 |
| GO:0005525                  | GTP binding                               | 1                                          | 5                     | 0.040573406 |
| GO:0031225                  | anchored to membrane                      | 1                                          | 5                     | 0.047253631 |
| GO:0005886                  | plasma membrane                           | 2                                          | 5                     | 0.049853434 |
| GO:0048046                  | apoplast                                  | 1                                          | 5                     | 0.05516543  |
| GO:0009651                  | response to salt stress                   | 1                                          | 5                     | 0.065538689 |
| GO:0005618                  | cell wall                                 | 1                                          | 5                     | 0.068526648 |
| GO:0005515                  | protein binding                           | 1                                          | 5                     | 0.227022106 |
| GO:0016020                  | membrane                                  | 1                                          | 5                     | 0.245693865 |
| GO:0012505                  | endomembrane system                       | 1                                          | 5                     | 0.345663617 |

**Cluster 53**

| <u>GO Identifier</u> | <u>#Loci</u> | <u>Associated Loci (Left to Right)</u> |
|----------------------|--------------|----------------------------------------|
| GO:0001676           | 1            | AT5G27600                              |
| GO:0003924           | 1            | AT2G38840                              |
| GO:0004467           | 1            | AT5G27600                              |
| GO:0005507           | 1            | AT4G12420                              |
| GO:0005515           | 1            | AT5G27600                              |
| GO:0005525           | 1            | AT2G38840                              |
| GO:0005618           | 1            | AT4G12420                              |
| GO:0005777           | 1            | AT5G27600                              |
| GO:0005794           | 1            | AT5G14430                              |
| GO:0005886           | 2            | AT4G12420 AT5G14430                    |
| GO:0006955           | 1            | AT2G38840                              |
| GO:0009505           | 2            | AT4G12420 AT5G14430                    |
| GO:0009651           | 1            | AT5G27600                              |
| GO:0009932           | 1            | AT4G12420                              |
| GO:0010193           | 1            | AT5G27600                              |
| GO:0012505           | 1            | AT2G38840                              |
| GO:0016020           | 1            | AT4G12420                              |
| GO:0031225           | 1            | AT4G12420                              |
| GO:0046658           | 1            | AT4G12420                              |
| GO:0048046           | 1            | AT4G12420                              |

### Cluster 54

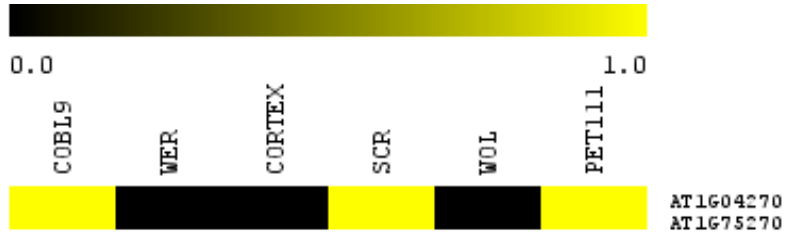

**Cluster 54**  
 AT1G04270  
 AT1G75270

| Cluster 54<br>GO identifier | Description                                    | #<br>Associated<br>to the GO<br>in Cluster | Total # in<br>Cluster | p-value     |
|-----------------------------|------------------------------------------------|--------------------------------------------|-----------------------|-------------|
| GO:0045174                  | glutathione dehydrogenase (ascorbate) activity | 1                                          | 2                     | 2.88E-04    |
| GO:0043295                  | glutathione binding                            | 1                                          | 2                     | 6.71E-04    |
| GO:0005886                  | plasma membrane                                | 2                                          | 2                     | 0.006401074 |
| GO:0022627                  | cytosolic small ribosomal subunit              | 1                                          | 2                     | 0.007642958 |
| GO:0022626                  | cytosolic ribosome                             | 1                                          | 2                     | 0.01588786  |
| GO:0003735                  | structural constituent of ribosome             | 1                                          | 2                     | 0.026866072 |
| GO:0006412                  | translation                                    | 1                                          | 2                     | 0.027984924 |

#### Cluster 54

| <u>GO Identifier</u> | <u>#Loci</u> | <u>Associated Loci (Left to Right)</u> |
|----------------------|--------------|----------------------------------------|
| GO:0003735           | 1            | AT1G04270                              |
| GO:0005886           | 2            | AT1G04270 AT1G75270                    |
| GO:0006412           | 1            | AT1G04270                              |
| GO:0022626           | 1            | AT1G04270                              |
| GO:0022627           | 1            | AT1G04270                              |
| GO:0043295           | 1            | AT1G75270                              |
| GO:0045174           | 1            | AT1G75270                              |

## Cluster 55

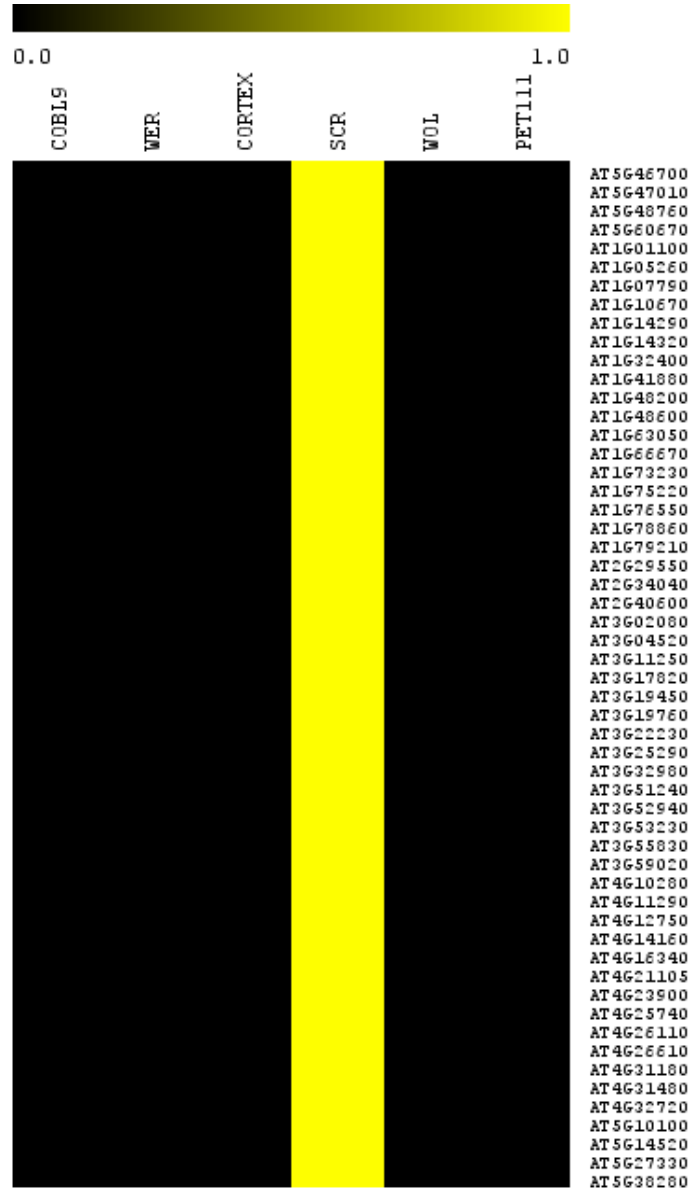

### Cluster 55

|           |           |           |           |           |
|-----------|-----------|-----------|-----------|-----------|
| AT1G01100 | AT2G29550 | AT3G02080 | AT4G10280 | AT5G10100 |
| AT1G05260 | AT2G34040 | AT3G04520 | AT4G11290 | AT5G14520 |
| AT1G07790 | AT2G40600 | AT3G11250 | AT4G12750 | AT5G27330 |
| AT1G10670 |           | AT3G17820 | AT4G14160 | AT5G38280 |
| AT1G14290 |           | AT3G19450 | AT4G16340 | AT5G46700 |
| AT1G14320 |           | AT3G19760 | AT4G21105 | AT5G47010 |
| AT1G32400 |           | AT3G22230 | AT4G23900 | AT5G48760 |
| AT1G41880 |           | AT3G25290 | AT4G25740 | AT5G60670 |
| AT1G48200 |           | AT3G32980 | AT4G26110 |           |
| AT1G48600 |           | AT3G51240 | AT4G26610 |           |
| AT1G63050 |           | AT3G52940 | AT4G31180 |           |
| AT1G66670 |           | AT3G53230 | AT4G31480 |           |
| AT1G73230 |           | AT3G55830 | AT4G32720 |           |
| AT1G75220 |           | AT3G59020 |           |           |
| AT1G76550 |           |           |           |           |
| AT1G78860 |           |           |           |           |
| AT1G79210 |           |           |           |           |



| Cluster 55<br>GO identifier | Description                                                                | #<br>Associated<br>to the GO<br>in Cluster | Total # in<br>Cluster | p-value     |
|-----------------------------|----------------------------------------------------------------------------|--------------------------------------------|-----------------------|-------------|
| GO:0022626                  | cytosolic ribosome                                                         | 8                                          | 55                    | 1.21E-08    |
| GO:0003735                  | structural constituent of ribosome                                         | 8                                          | 55                    | 6.97E-07    |
| GO:0006412                  | translation                                                                | 6                                          | 55                    | 1.13E-04    |
| GO:0005840                  | ribosome                                                                   | 5                                          | 55                    | 1.14E-04    |
| GO:0022625                  | cytosolic large ribosomal subunit                                          | 4                                          | 55                    | 1.34E-04    |
| GO:0005886                  | plasma membrane                                                            | 12                                         | 55                    | 8.26E-04    |
| GO:0006414                  | translational elongation                                                   | 2                                          | 55                    | 0.001499183 |
| GO:0042254                  | ribosome biogenesis                                                        | 3                                          | 55                    | 0.001798132 |
| GO:0006422                  | aspartyl-tRNA aminoacylation                                               | 1                                          | 55                    | 0.002637257 |
| GO:0045486                  | naringenin 3-dioxygenase activity                                          | 1                                          | 55                    | 0.002637257 |
| GO:0050613                  | delta14-sterol reductase activity                                          | 1                                          | 55                    | 0.002637257 |
| GO:0051020                  | GTPase binding                                                             | 1                                          | 55                    | 0.002637257 |
| GO:0015934                  | large ribosomal subunit                                                    | 2                                          | 55                    | 0.003531236 |
| GO:0000170                  | sphingosine hydroxylase activity                                           | 1                                          | 55                    | 0.005260857 |
| GO:0004793                  | threonine aldolase activity                                                | 1                                          | 55                    | 0.005260857 |
| GO:0004815                  | aspartate-tRNA ligase activity                                             | 1                                          | 55                    | 0.005260857 |
| GO:0006183                  | GTP biosynthetic process                                                   | 1                                          | 55                    | 0.005260857 |
| GO:0006228                  | UTP biosynthetic process                                                   | 1                                          | 55                    | 0.005260857 |
| GO:0006241                  | CTP biosynthetic process                                                   | 1                                          | 55                    | 0.005260857 |
| GO:0006567                  | threonine catabolic process                                                | 1                                          | 55                    | 0.005260857 |
| GO:0010317                  | pyrophosphate-dependent phosphofructokinase complex, alpha-subunit complex | 1                                          | 55                    | 0.005260857 |
| GO:0016337                  | cell-cell adhesion                                                         | 1                                          | 55                    | 0.005260857 |
| GO:0046520                  | sphingoid biosynthetic process                                             | 1                                          | 55                    | 0.005260857 |
| GO:0046686                  | response to cadmium ion                                                    | 4                                          | 55                    | 0.005364563 |
| GO:0007568                  | aging                                                                      | 2                                          | 55                    | 0.006059268 |
| GO:0006334                  | nucleosome assembly                                                        | 2                                          | 55                    | 0.007402579 |
| GO:0000184                  | nuclear-transcribed mRNA catabolic process, nonsense-mediated decay        | 1                                          | 55                    | 0.00787085  |
| GO:0006542                  | glutamine biosynthetic process                                             | 1                                          | 55                    | 0.00787085  |
| GO:0045995                  | regulation of embryonic development                                        | 1                                          | 55                    | 0.00787085  |
| GO:0043481                  | anthocyanin accumulation in tissues in response to UV light                | 1                                          | 55                    | 0.010467289 |
| GO:0045793                  | positive regulation of cell size                                           | 1                                          | 55                    | 0.010467289 |
| GO:0046786                  | viral replication complex formation and maintenance                        | 1                                          | 55                    | 0.010467289 |
| GO:0047334                  | diphosphate-fructose-6-phosphate 1-phosphotransferase activity             | 1                                          | 55                    | 0.010467289 |
| GO:0004601                  | peroxidase activity                                                        | 2                                          | 55                    | 0.012443531 |
| GO:0004550                  | nucleoside diphosphate kinase activity                                     | 1                                          | 55                    | 0.013050226 |
| GO:0009346                  | citrate lyase complex                                                      | 1                                          | 55                    | 0.013050226 |
| GO:0016246                  | RNA interference                                                           | 1                                          | 55                    | 0.013050226 |
| GO:0016020                  | membrane                                                                   | 8                                          | 55                    | 0.015243643 |
| GO:0003878                  | ATP citrate synthase activity                                              | 1                                          | 55                    | 0.015619712 |
| GO:0006085                  | acetyl-CoA biosynthetic process                                            | 1                                          | 55                    | 0.015619712 |
| GO:0006916                  | anti-apoptosis                                                             | 1                                          | 55                    | 0.015619712 |
| GO:0009956                  | radial pattern formation                                                   | 1                                          | 55                    | 0.015619712 |
| GO:0045551                  | cinnamyl-alcohol dehydrogenase activity                                    | 1                                          | 55                    | 0.015619712 |
| GO:0022627                  | cytosolic small ribosomal subunit                                          | 2                                          | 55                    | 0.017687969 |
| GO:0004356                  | glutamate-ammonia ligase activity                                          | 1                                          | 55                    | 0.018175799 |
| GO:0005085                  | guanyl-nucleotide exchange factor activity                                 | 1                                          | 55                    | 0.018175799 |
| GO:0009840                  | chloroplastic endopeptidase Clp complex                                    | 1                                          | 55                    | 0.018175799 |
| GO:0010015                  | root morphogenesis                                                         | 1                                          | 55                    | 0.018175799 |
| GO:0004129                  | cytochrome-c oxidase activity                                              | 1                                          | 55                    | 0.020718538 |
| GO:0042128                  | nitrate assimilation                                                       | 1                                          | 55                    | 0.020718538 |

| Cluster 55<br>GO identifier<br>(con.) | Description                                                     | #<br>Associated<br>to the GO<br>in Cluster | Total # in<br>Cluster | p-value     |
|---------------------------------------|-----------------------------------------------------------------|--------------------------------------------|-----------------------|-------------|
| GO:0045298                            | tubulin complex                                                 | 1                                          | 55                    | 0.020718538 |
| GO:0005730                            | nucleolus                                                       | 3                                          | 55                    | 0.021344117 |
| GO:0004675                            | transmembrane receptor protein serine/threonine kinase activity | 1                                          | 55                    | 0.02324798  |
| GO:0010025                            | wax biosynthetic process                                        | 1                                          | 55                    | 0.025764175 |
| GO:0019252                            | starch biosynthetic process                                     | 1                                          | 55                    | 0.025764175 |
| GO:0030127                            | COPII vesicle coat                                              | 1                                          | 55                    | 0.025764175 |
| GO:0035251                            | UDP-glucosyltransferase activity                                | 1                                          | 55                    | 0.025764175 |
| GO:0005783                            | endoplasmic reticulum                                           | 3                                          | 55                    | 0.027555944 |
| GO:0003724                            | RNA helicase activity                                           | 1                                          | 55                    | 0.028267175 |
| GO:0009534                            | chloroplast thylakoid                                           | 1                                          | 55                    | 0.03075703  |
| GO:0000059                            | protein import into nucleus, docking                            | 1                                          | 55                    | 0.03323379  |
| GO:0005654                            | nucleoplasm                                                     | 1                                          | 55                    | 0.03323379  |
| GO:0009933                            | meristem structural organization                                | 1                                          | 55                    | 0.03323379  |
| GO:0009651                            | response to salt stress                                         | 3                                          | 55                    | 0.03366747  |
| GO:0004805                            | trehalose-phosphatase activity                                  | 1                                          | 55                    | 0.035697505 |
| GO:0016117                            | carotenoid biosynthetic process                                 | 1                                          | 55                    | 0.035697505 |
| GO:0005618                            | cell wall                                                       | 3                                          | 55                    | 0.037467674 |
| GO:0007017                            | microtubule-based process                                       | 1                                          | 55                    | 0.038148227 |
| GO:0009269                            | response to desiccation                                         | 1                                          | 55                    | 0.038148227 |
| GO:0005794                            | Golgi apparatus                                                 | 2                                          | 55                    | 0.040240628 |
| GO:0009532                            | plastid stroma                                                  | 1                                          | 55                    | 0.040586003 |
| GO:0003713                            | transcription coactivator activity                              | 1                                          | 55                    | 0.043010885 |
| GO:0010087                            | phloem or xylem histogenesis                                    | 1                                          | 55                    | 0.043010885 |
| GO:0010305                            | leaf vascular tissue pattern formation                          | 1                                          | 55                    | 0.043010885 |
| GO:0005992                            | trehalose biosynthetic process                                  | 1                                          | 55                    | 0.045422921 |
| GO:0005839                            | proteasome core complex                                         | 1                                          | 55                    | 0.050208655 |
| GO:0010182                            | sugar mediated signaling                                        | 1                                          | 55                    | 0.052582451 |
| GO:0016126                            | sterol biosynthetic process                                     | 1                                          | 55                    | 0.054943598 |
| GO:0005643                            | nuclear pore                                                    | 1                                          | 55                    | 0.057292145 |
| GO:0005200                            | structural constituent of cytoskeleton                          | 1                                          | 55                    | 0.061951632 |
| GO:0008283                            | cell proliferation                                              | 1                                          | 55                    | 0.064262668 |
| GO:0009813                            | flavonoid biosynthetic process                                  | 1                                          | 55                    | 0.064262668 |
| GO:0009911                            | positive regulation of flower development                       | 1                                          | 55                    | 0.064262668 |
| GO:0015995                            | chlorophyll biosynthetic process                                | 1                                          | 55                    | 0.064262668 |
| GO:0005829                            | cytosol                                                         | 2                                          | 55                    | 0.065042851 |
| GO:0009620                            | response to fungus                                              | 1                                          | 55                    | 0.068847569 |
| GO:0009809                            | lignin biosynthetic process                                     | 1                                          | 55                    | 0.073383224 |
| GO:0009790                            | embryonic development                                           | 1                                          | 55                    | 0.075632703 |
| GO:0005737                            | cytoplasm                                                       | 3                                          | 55                    | 0.075707831 |
| GO:0010224                            | response to UV-B                                                | 1                                          | 55                    | 0.077870013 |
| GO:0005773                            | vacuole                                                         | 3                                          | 55                    | 0.082290385 |
| GO:0043565                            | sequence-specific DNA binding                                   | 1                                          | 55                    | 0.086698502 |
| GO:0009640                            | photomorphogenesis                                              | 1                                          | 55                    | 0.08887567  |
| GO:0009744                            | response to sucrose stimulus                                    | 1                                          | 55                    | 0.08887567  |
| GO:0042538                            | hyperosmotic salinity response                                  | 1                                          | 55                    | 0.08887567  |
| GO:0008643                            | carbohydrate transport                                          | 1                                          | 55                    | 0.091040949 |
| GO:0006096                            | glycolysis                                                      | 1                                          | 55                    | 0.101690621 |
| GO:0006633                            | fatty acid biosynthetic process                                 | 1                                          | 55                    | 0.110001027 |
| GO:0008415                            | acyltransferase activity                                        | 1                                          | 55                    | 0.133845873 |
| GO:0005524                            | ATP binding                                                     | 3                                          | 55                    | 0.145251197 |
| GO:0008026                            | ATP-dependent helicase activity                                 | 1                                          | 55                    | 0.150694471 |
| GO:0006810                            | transport                                                       | 2                                          | 55                    | 0.153641485 |

| Cluster 55<br>GO identifier<br>(con.) | Description                                        | #<br>Associated<br>to the GO<br>in Cluster | Total # in<br>Cluster | p-value     |
|---------------------------------------|----------------------------------------------------|--------------------------------------------|-----------------------|-------------|
| GO:0008565                            | protein transporter activity                       | 1                                          | 55                    | 0.156119656 |
| GO:0009055                            | electron carrier activity                          | 1                                          | 55                    | 0.161451208 |
| GO:0048366                            | leaf development                                   | 1                                          | 55                    | 0.163207776 |
| GO:0006281                            | DNA repair                                         | 1                                          | 55                    | 0.164954105 |
| GO:0015144                            | carbohydrate transmembrane transporter activity    | 1                                          | 55                    | 0.164954105 |
| GO:0005351                            | sugar:hydrogen symporter activity                  | 1                                          | 55                    | 0.168416204 |
| GO:0005507                            | copper ion binding                                 | 1                                          | 55                    | 0.212778907 |
| GO:0005488                            | binding                                            | 2                                          | 55                    | 0.215047137 |
| GO:0007275                            | multicellular organismal development               | 1                                          | 55                    | 0.241350617 |
| GO:0042742                            | defense response to bacterium                      | 1                                          | 55                    | 0.250044971 |
| GO:0005525                            | GTP binding                                        | 1                                          | 55                    | 0.293387961 |
| GO:0009409                            | response to cold                                   | 1                                          | 55                    | 0.304646383 |
| GO:0006511                            | ubiquitin-dependent protein catabolic process      | 1                                          | 55                    | 0.306280431 |
| GO:0006979                            | response to oxidative stress                       | 1                                          | 55                    | 0.30788897  |
| GO:0005215                            | transporter activity                               | 1                                          | 55                    | 0.330329203 |
| GO:0009793                            | embryonic development ending in seed dormancy      | 1                                          | 55                    | 0.356138391 |
| GO:0003723                            | RNA binding                                        | 1                                          | 55                    | 0.361051912 |
| GO:0016757                            | transferase activity, transferring glycosyl groups | 1                                          | 55                    | 0.361592749 |
| GO:0009570                            | chloroplast stroma                                 | 1                                          | 55                    | 0.370909758 |
| GO:0003824                            | catalytic activity                                 | 1                                          | 55                    | 0.371648878 |
| GO:0009941                            | chloroplast envelope                               | 1                                          | 55                    | 0.371648878 |

### Cluster 55

| GO Identifier | #Loci | Associated Loci (Left to Right) |           |           |           |           |           |
|---------------|-------|---------------------------------|-----------|-----------|-----------|-----------|-----------|
| GO:0000059    | 1     | AT3G59020                       |           |           |           |           |           |
| GO:0000170    | 1     | AT1G14290                       |           |           |           |           |           |
| GO:0000184    | 1     | AT5G47010                       |           |           |           |           |           |
| GO:0003713    | 1     | AT5G14520                       |           |           |           |           |           |
| GO:0003723    | 1     | AT4G32720                       |           |           |           |           |           |
| GO:0003724    | 1     | AT5G47010                       |           |           |           |           |           |
| GO:0003735    | 8     | AT1G01100                       | AT1G14320 | AT3G02080 | AT3G11250 | AT3G22230 | AT4G25740 |
|               |       | AT5G48760                       | AT5G60670 |           |           |           |           |
| GO:0003824    | 1     | AT1G14290                       |           |           |           |           |           |
| GO:0003878    | 1     | AT1G10670                       |           |           |           |           |           |
| GO:0004129    | 1     | AT4G21105                       |           |           |           |           |           |
| GO:0004356    | 1     | AT3G17820                       |           |           |           |           |           |
| GO:0004550    | 1     | AT4G23900                       |           |           |           |           |           |
| GO:0004601    | 2     | AT1G05260                       | AT4G11290 |           |           |           |           |
| GO:0004675    | 1     | AT5G38280                       |           |           |           |           |           |
| GO:0004793    | 1     | AT3G04520                       |           |           |           |           |           |
| GO:0004805    | 1     | AT5G10100                       |           |           |           |           |           |
| GO:0004815    | 1     | AT4G31180                       |           |           |           |           |           |
| GO:0005085    | 1     | AT4G16340                       |           |           |           |           |           |
| GO:0005200    | 1     | AT2G29550                       |           |           |           |           |           |
| GO:0005215    | 1     | AT4G14160                       |           |           |           |           |           |
| GO:0005351    | 1     | AT1G75220                       |           |           |           |           |           |
| GO:0005488    | 2     | AT2G34040                       | AT4G16340 |           |           |           |           |
| GO:0005507    | 1     | AT3G17820                       |           |           |           |           |           |
| GO:0005524    | 3     | AT3G53230                       | AT4G23900 | AT4G31180 |           |           |           |
| GO:0005525    | 1     | AT4G16340                       |           |           |           |           |           |
| GO:0005618    | 3     | AT2G29550                       | AT3G02080 | AT4G32720 |           |           |           |
| GO:0005643    | 1     | AT3G59020                       |           |           |           |           |           |
| GO:0005654    | 1     | AT4G32720                       |           |           |           |           |           |
| GO:0005730    | 3     | AT1G14320                       | AT3G19760 | AT3G53230 |           |           |           |
| GO:0005737    | 3     | AT3G59020                       | AT4G26110 | AT4G31180 |           |           |           |

**Cluster 55 (con.)**

| <b>GO Identifier</b> | <b>#Loci</b> | <b>Associated Loci (Left to Right)</b> |           |           |           |           |           |  |
|----------------------|--------------|----------------------------------------|-----------|-----------|-----------|-----------|-----------|--|
| GO:0005773           | 3            | AT1G14320                              | AT1G32400 | AT2G29550 |           |           |           |  |
| GO:0005783           | 3            | AT1G05260                              | AT1G14290 | AT5G27330 |           |           |           |  |
| GO:0005794           | 2            | AT1G14290                              | AT3G55830 |           |           |           |           |  |
| GO:0005829           | 2            | AT1G10670                              | AT3G17820 |           |           |           |           |  |
| GO:0005839           | 1            | AT1G79210                              |           |           |           |           |           |  |
| GO:0005840           | 5            | AT1G01100                              | AT3G02080 | AT3G11250 | AT3G22230 | AT5G60670 |           |  |
| GO:0005886           | 12           | AT1G01100                              | AT1G14320 | AT1G75220 | AT2G29550 | AT3G17820 | AT3G25290 |  |
|                      |              | AT3G53230                              | AT4G16340 | AT4G21105 | AT4G26110 | AT5G46700 | AT5G47010 |  |
| GO:0005992           | 1            | AT5G10100                              |           |           |           |           |           |  |
| GO:0006085           | 1            | AT1G10670                              |           |           |           |           |           |  |
| GO:0006096           | 1            | AT1G76550                              |           |           |           |           |           |  |
| GO:0006183           | 1            | AT4G23900                              |           |           |           |           |           |  |
| GO:0006228           | 1            | AT4G23900                              |           |           |           |           |           |  |
| GO:0006241           | 1            | AT4G23900                              |           |           |           |           |           |  |
| GO:0006281           | 1            | AT4G26110                              |           |           |           |           |           |  |
| GO:0006334           | 2            | AT1G07790                              | AT4G26110 |           |           |           |           |  |
| GO:0006412           | 6            | AT1G14320                              | AT3G02080 | AT3G11250 | AT3G22230 | AT4G25740 | AT5G48760 |  |
| GO:0006414           | 2            | AT1G01100                              | AT3G11250 |           |           |           |           |  |
| GO:0006422           | 1            | AT4G31180                              |           |           |           |           |           |  |
| GO:0006511           | 1            | AT1G79210                              |           |           |           |           |           |  |
| GO:0006542           | 1            | AT3G17820                              |           |           |           |           |           |  |
| GO:0006567           | 1            | AT3G04520                              |           |           |           |           |           |  |
| GO:0006633           | 1            | AT1G10670                              |           |           |           |           |           |  |
| GO:0006810           | 2            | AT1G75220                              | AT4G14160 |           |           |           |           |  |
| GO:0006916           | 1            | AT2G34040                              |           |           |           |           |           |  |
| GO:0006979           | 1            | AT4G11290                              |           |           |           |           |           |  |
| GO:0007017           | 1            | AT2G29550                              |           |           |           |           |           |  |
| GO:0007275           | 1            | AT3G25290                              |           |           |           |           |           |  |
| GO:0007568           | 2            | AT1G10670                              | AT5G46700 |           |           |           |           |  |
| GO:0008026           | 1            | AT3G19760                              |           |           |           |           |           |  |
| GO:0008283           | 1            | AT5G14520                              |           |           |           |           |           |  |
| GO:0008415           | 1            | AT1G63050                              |           |           |           |           |           |  |
| GO:0008565           | 1            | AT3G59020                              |           |           |           |           |           |  |
| GO:0008643           | 1            | AT1G75220                              |           |           |           |           |           |  |
| GO:0009055           | 1            | AT4G21105                              |           |           |           |           |           |  |
| GO:0009269           | 1            | AT1G05260                              |           |           |           |           |           |  |
| GO:0009346           | 1            | AT1G10670                              |           |           |           |           |           |  |
| GO:0009409           | 1            | AT1G05260                              |           |           |           |           |           |  |
| GO:0009532           | 1            | AT1G66670                              |           |           |           |           |           |  |
| GO:0009534           | 1            | AT1G66670                              |           |           |           |           |           |  |
| GO:0009570           | 1            | AT1G66670                              |           |           |           |           |           |  |
| GO:0009620           | 1            | AT5G38280                              |           |           |           |           |           |  |
| GO:0009640           | 1            | AT1G14290                              |           |           |           |           |           |  |
| GO:0009651           | 3            | AT1G73230                              | AT2G29550 | AT3G11250 |           |           |           |  |
| GO:0009744           | 1            | AT5G47010                              |           |           |           |           |           |  |
| GO:0009790           | 1            | AT4G32720                              |           |           |           |           |           |  |
| GO:0009793           | 1            | AT3G52940                              |           |           |           |           |           |  |
| GO:0009809           | 1            | AT3G19450                              |           |           |           |           |           |  |
| GO:0009813           | 1            | AT3G51240                              |           |           |           |           |           |  |
| GO:0009840           | 1            | AT1G66670                              |           |           |           |           |           |  |
| GO:0009911           | 1            | AT1G10670                              |           |           |           |           |           |  |
| GO:0009933           | 1            | AT5G46700                              |           |           |           |           |           |  |
| GO:0009941           | 1            | AT1G66670                              |           |           |           |           |           |  |
| GO:0009956           | 1            | AT5G46700                              |           |           |           |           |           |  |
| GO:0010015           | 1            | AT5G46700                              |           |           |           |           |           |  |
| GO:0010025           | 1            | AT1G10670                              |           |           |           |           |           |  |
| GO:0010087           | 1            | AT3G55830                              |           |           |           |           |           |  |
| GO:0010182           | 1            | AT5G47010                              |           |           |           |           |           |  |
| GO:0010224           | 1            | AT3G51240                              |           |           |           |           |           |  |
| GO:0010305           | 1            | AT5G46700                              |           |           |           |           |           |  |

**Cluster 55 (con.)**

| <u>GO Identifier</u> | <u>#Loci</u> | <u>Associated Loci (Left to Right)</u> |           |           |           |           |           |  |
|----------------------|--------------|----------------------------------------|-----------|-----------|-----------|-----------|-----------|--|
| GO:0010317           | 1            | AT1G76550                              |           |           |           |           |           |  |
| GO:0015144           | 1            | AT1G75220                              |           |           |           |           |           |  |
| GO:0015934           | 2            | AT1G14320                              | AT5G48760 |           |           |           |           |  |
| GO:0015995           | 1            | AT1G10670                              |           |           |           |           |           |  |
| GO:0016020           | 8            | AT1G32400                              | AT1G63050 | AT1G75220 | AT3G11250 | AT3G19760 | AT3G25290 |  |
|                      |              | AT3G52940                              | AT4G25740 |           |           |           |           |  |
| GO:0016117           | 1            | AT1G10670                              |           |           |           |           |           |  |
| GO:0016126           | 1            | AT3G52940                              |           |           |           |           |           |  |
| GO:0016246           | 1            | AT5G47010                              |           |           |           |           |           |  |
| GO:0016337           | 1            | AT3G55830                              |           |           |           |           |           |  |
| GO:0016757           | 1            | AT3G55830                              |           |           |           |           |           |  |
| GO:0019252           | 1            | AT1G10670                              |           |           |           |           |           |  |
| GO:0022625           | 4            | AT1G14320                              | AT3G22230 | AT5G48760 | AT5G60670 |           |           |  |
| GO:0022626           | 8            | AT1G01100                              | AT1G14320 | AT3G02080 | AT3G11250 | AT3G17820 | AT3G22230 |  |
|                      |              | AT4G25740                              | AT5G48760 |           |           |           |           |  |
| GO:0022627           | 2            | AT3G02080                              | AT4G25740 |           |           |           |           |  |
| GO:0030127           | 1            | AT4G14160                              |           |           |           |           |           |  |
| GO:0035251           | 1            | AT3G55830                              |           |           |           |           |           |  |
| GO:0042128           | 1            | AT3G17820                              |           |           |           |           |           |  |
| GO:0042254           | 3            | AT3G22230                              | AT4G32720 | AT5G60670 |           |           |           |  |
| GO:0042538           | 1            | AT1G05260                              |           |           |           |           |           |  |
| GO:0042742           | 1            | AT1G79210                              |           |           |           |           |           |  |
| GO:0043481           | 1            | AT1G10670                              |           |           |           |           |           |  |
| GO:0043565           | 1            | AT4G12750                              |           |           |           |           |           |  |
| GO:0045298           | 1            | AT2G29550                              |           |           |           |           |           |  |
| GO:0045486           | 1            | AT3G51240                              |           |           |           |           |           |  |
| GO:0045551           | 1            | AT3G19450                              |           |           |           |           |           |  |
| GO:0045793           | 1            | AT1G10670                              |           |           |           |           |           |  |
| GO:0045995           | 1            | AT1G10670                              |           |           |           |           |           |  |
| GO:0046520           | 1            | AT1G14290                              |           |           |           |           |           |  |
| GO:0046686           | 4            | AT2G29550                              | AT3G17820 | AT3G53230 | AT4G31180 |           |           |  |
| GO:0046786           | 1            | AT1G32400                              |           |           |           |           |           |  |
| GO:0047334           | 1            | AT1G76550                              |           |           |           |           |           |  |
| GO:0048366           | 1            | AT1G10670                              |           |           |           |           |           |  |
| GO:0050613           | 1            | AT3G52940                              |           |           |           |           |           |  |
| GO:0051020           | 1            | AT4G16340                              |           |           |           |           |           |  |

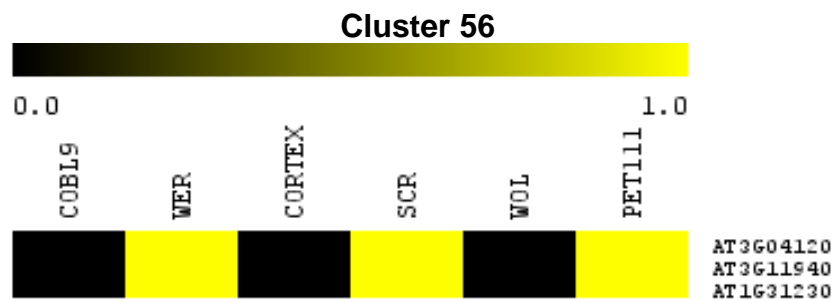

**Cluster 56**  
AT1G31230  
AT3G04120  
AT3G11940

| Cluster 56<br>GO identifier | Description                                                         | #<br>Associated<br>to the GO<br>in Cluster | Total # in<br>Cluster | p-value     |
|-----------------------------|---------------------------------------------------------------------|--------------------------------------------|-----------------------|-------------|
| GO:0004365                  | glyceraldehyde-3-phosphate dehydrogenase (phosphorylating) activity | 1                                          | 3                     | 1.44E-04    |
| GO:0004072                  | aspartate kinase activity                                           | 1                                          | 3                     | 4.31E-04    |
| GO:0004412                  | homoserine dehydrogenase activity                                   | 1                                          | 3                     | 4.31E-04    |
| GO:0009067                  | aspartate family amino acid biosynthetic process                    | 1                                          | 3                     | 4.31E-04    |
| GO:0008943                  | glyceraldehyde-3-phosphate dehydrogenase activity                   | 1                                          | 3                     | 7.19E-04    |
| GO:0006094                  | gluconeogenesis                                                     | 1                                          | 3                     | 0.00129366  |
| GO:0005740                  | mitochondrial envelope                                              | 1                                          | 3                     | 0.002011395 |
| GO:0010154                  | fruit development                                                   | 1                                          | 3                     | 0.003015067 |
| GO:0048316                  | seed development                                                    | 1                                          | 3                     | 0.003587987 |
| GO:0042542                  | response to hydrogen peroxide                                       | 1                                          | 3                     | 0.004589537 |
| GO:0009744                  | response to sucrose stimulus                                        | 1                                          | 3                     | 0.005304104 |
| GO:0006096                  | glycolysis                                                          | 1                                          | 3                     | 0.006160676 |
| GO:0006950                  | response to stress                                                  | 1                                          | 3                     | 0.012128977 |
| GO:0009408                  | response to heat                                                    | 1                                          | 3                     | 0.013401599 |
| GO:0005829                  | cytosol                                                             | 1                                          | 3                     | 0.024338155 |
| GO:0006979                  | response to oxidative stress                                        | 1                                          | 3                     | 0.027115656 |
| GO:0009507                  | chloroplast                                                         | 2                                          | 3                     | 0.03349462  |
| GO:0048046                  | apoplast                                                            | 1                                          | 3                     | 0.03387456  |
| GO:0046686                  | response to cadmium ion                                             | 1                                          | 3                     | 0.038935069 |
| GO:0009651                  | response to salt stress                                             | 1                                          | 3                     | 0.040432401 |
| GO:0009570                  | chloroplast stroma                                                  | 1                                          | 3                     | 0.049213621 |
| GO:0005739                  | mitochondrion                                                       | 1                                          | 3                     | 0.102623018 |
| GO:0016020                  | membrane                                                            | 1                                          | 3                     | 0.168256477 |
| GO:0005886                  | plasma membrane                                                     | 1                                          | 3                     | 0.203214985 |
| GO:0005634                  | nucleus                                                             | 1                                          | 3                     | 0.207019295 |

### Cluster 56

| <u>GO Identifier</u> | <u>#Loci</u> | <u>Associated Loci (Left to Right)</u> |
|----------------------|--------------|----------------------------------------|
| GO:0004072           | 1            | AT1G31230                              |
| GO:0004365           | 1            | AT3G04120                              |
| GO:0004412           | 1            | AT1G31230                              |
| GO:0005634           | 1            | AT3G04120                              |
| GO:0005739           | 1            | AT3G04120                              |
| GO:0005740           | 1            | AT3G04120                              |
| GO:0005829           | 1            | AT3G04120                              |
| GO:0005886           | 1            | AT3G04120                              |
| GO:0006094           | 1            | AT3G04120                              |
| GO:0006096           | 1            | AT3G04120                              |
| GO:0006950           | 1            | AT3G04120                              |
| GO:0006979           | 1            | AT3G04120                              |
| GO:0008943           | 1            | AT3G04120                              |
| GO:0009067           | 1            | AT1G31230                              |
| GO:0009408           | 1            | AT3G04120                              |
| GO:0009507           | 2            | AT1G31230 AT3G04120                    |
| GO:0009570           | 1            | AT1G31230                              |
| GO:0009651           | 1            | AT3G04120                              |
| GO:0009744           | 1            | AT3G04120                              |
| GO:0010154           | 1            | AT3G04120                              |
| GO:0016020           | 1            | AT3G04120                              |
| GO:0042542           | 1            | AT3G04120                              |
| GO:0046686           | 1            | AT3G04120                              |
| GO:0048046           | 1            | AT3G04120                              |
| GO:0048316           | 1            | AT3G04120                              |

### Cluster 57

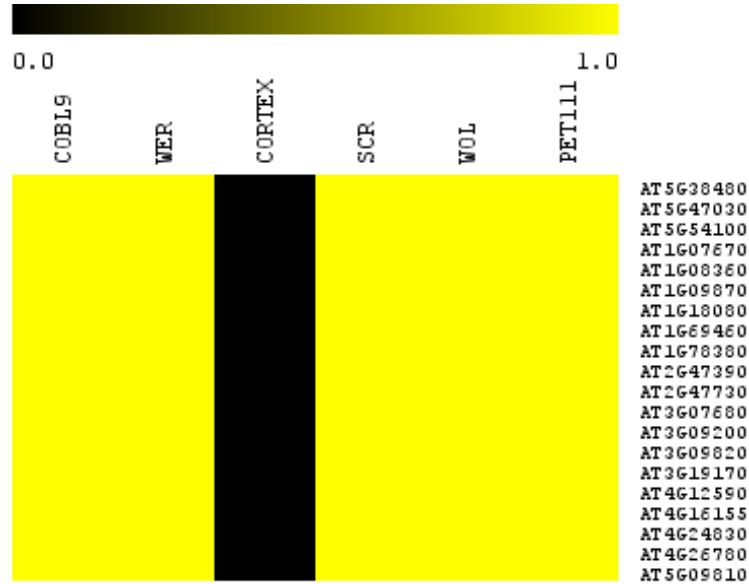

### Cluster 57

AT1G07670  
 AT1G08360  
 AT1G09870  
 AT1G18080  
 AT1G69460  
 AT1G78380  
 AT2G47390  
 AT2G47730  
 AT3G07680  
 AT3G09200  
 AT3G09820  
 AT3G19170  
 AT4G12590  
 AT4G16155  
 AT4G24830  
 AT4G26780  
 AT5G09810  
 AT5G38480  
 AT5G47030  
 AT5G54100

| Cluster 57<br>GO identifier | Description                      | #<br>Associated<br>to the GO<br>in Cluster | Total # in<br>Cluster | p-value  |
|-----------------------------|----------------------------------|--------------------------------------------|-----------------------|----------|
| GO:0009570                  | chloroplast stroma               | 5                                          | 20                    | 1.65E-05 |
| GO:0009507                  | chloroplast                      | 10                                         | 20                    | 1.75E-05 |
| GO:0043295                  | glutathione binding              | 2                                          | 20                    | 1.83E-05 |
| GO:0005886                  | plasma membrane                  | 8                                          | 20                    | 7.70E-05 |
| GO:0046686                  | response to cadmium ion          | 4                                          | 20                    | 1.21E-04 |
| GO:0022626                  | cytosolic ribosome               | 3                                          | 20                    | 5.03E-04 |
| GO:0005739                  | mitochondrion                    | 5                                          | 20                    | 5.96E-04 |
| GO:0009407                  | toxin catabolic process          | 2                                          | 20                    | 6.93E-04 |
| GO:0004364                  | glutathione transferase activity | 2                                          | 20                    | 7.97E-04 |

| Cluster 57<br>GO identifier<br>(con.) | Description                                                                 | #<br>Associated<br>to the GO<br>in Cluster | Total # in<br>Cluster | p-value     |
|---------------------------------------|-----------------------------------------------------------------------------|--------------------------------------------|-----------------------|-------------|
| GO:0004055                            | argininosuccinate synthase activity                                         | 1                                          | 20                    | 9.59E-04    |
| GO:0000275                            | mitochondrial proton-transporting ATP synthase complex, catalytic core F(1) | 1                                          | 20                    | 0.001916258 |
| GO:0004001                            | adenosine kinase activity                                                   | 1                                          | 20                    | 0.001916258 |
| GO:0006169                            | adenosine salvage                                                           | 1                                          | 20                    | 0.001916258 |
| GO:0051605                            | protein maturation via proteolysis                                          | 1                                          | 20                    | 0.001916258 |
| GO:0009651                            | response to salt stress                                                     | 3                                          | 20                    | 0.002374136 |
| GO:0000774                            | adenyl-nucleotide exchange factor activity                                  | 1                                          | 20                    | 0.002871768 |
| GO:0004148                            | dihydrolipoyl dehydrogenase activity                                        | 1                                          | 20                    | 0.003825535 |
| GO:0005753                            | mitochondrial proton-transporting ATP synthase complex                      | 1                                          | 20                    | 0.003825535 |
| GO:0009941                            | chloroplast envelope                                                        | 3                                          | 20                    | 0.004669412 |
| GO:0042631                            | cellular response to water deprivation                                      | 1                                          | 20                    | 0.004777561 |
| GO:0008320                            | protein transmembrane transporter activity                                  | 1                                          | 20                    | 0.005727849 |
| GO:0006526                            | arginine biosynthetic process                                               | 1                                          | 20                    | 0.007623218 |
| GO:0051087                            | chaperone binding                                                           | 1                                          | 20                    | 0.007623218 |
| GO:0005856                            | cytoskeleton                                                                | 1                                          | 20                    | 0.008568304 |
| GO:0045309                            | protein phosphorylated amino acid binding                                   | 1                                          | 20                    | 0.011393194 |
| GO:0005840                            | ribosome                                                                    | 2                                          | 20                    | 0.012562263 |
| GO:0009409                            | response to cold                                                            | 2                                          | 20                    | 0.013070281 |
| GO:0046933                            | hydrogen ion transporting ATP synthase activity, rotational mechanism       | 1                                          | 20                    | 0.01420258  |
| GO:0004252                            | serine-type endopeptidase activity                                          | 1                                          | 20                    | 0.015135606 |
| GO:0007010                            | cytoskeleton organization                                                   | 1                                          | 20                    | 0.018850598 |
| GO:0005730                            | nucleolus                                                                   | 2                                          | 20                    | 0.020075554 |
| GO:0048046                            | apoplast                                                                    | 2                                          | 20                    | 0.020532057 |
| GO:0006414                            | translational elongation                                                    | 1                                          | 20                    | 0.020697855 |
| GO:0005200                            | structural constituent of cytoskeleton                                      | 1                                          | 20                    | 0.023455993 |
| GO:0003735                            | structural constituent of ribosome                                          | 2                                          | 20                    | 0.027477588 |
| GO:0010319                            | stromule                                                                    | 1                                          | 20                    | 0.028926594 |
| GO:0006412                            | translation                                                                 | 2                                          | 20                    | 0.029540929 |
| GO:0008236                            | serine-type peptidase activity                                              | 1                                          | 20                    | 0.029832465 |
| GO:0005618                            | cell wall                                                                   | 2                                          | 20                    | 0.030767824 |
| GO:0003993                            | acid phosphatase activity                                                   | 1                                          | 20                    | 0.033439189 |
| GO:0009845                            | seed germination                                                            | 1                                          | 20                    | 0.03433669  |
| GO:0006508                            | proteolysis                                                                 | 2                                          | 20                    | 0.036954543 |
| GO:0042803                            | protein homodimerization activity                                           | 1                                          | 20                    | 0.037910041 |
| GO:0045454                            | cell redox homeostasis                                                      | 1                                          | 20                    | 0.04233942  |
| GO:0005834                            | heterotrimeric G-protein complex                                            | 1                                          | 20                    | 0.048471393 |
| GO:0048364                            | root development                                                            | 1                                          | 20                    | 0.061342817 |
| GO:0022625                            | cytosolic large ribosomal subunit                                           | 1                                          | 20                    | 0.087606596 |
| GO:0005507                            | copper ion binding                                                          | 1                                          | 20                    | 0.092354033 |
| GO:0009416                            | response to light stimulus                                                  | 1                                          | 20                    | 0.09313993  |
| GO:0009611                            | response to wounding                                                        | 1                                          | 20                    | 0.09313993  |
| GO:0005524                            | ATP binding                                                                 | 2                                          | 20                    | 0.098676235 |
| GO:0006886                            | intracellular protein transport                                             | 1                                          | 20                    | 0.100144808 |
| GO:0042742                            | defense response to bacterium                                               | 1                                          | 20                    | 0.113790818 |
| GO:0009579                            | thylakoid                                                                   | 1                                          | 20                    | 0.139667891 |
| GO:0005829                            | cytosol                                                                     | 1                                          | 20                    | 0.141051556 |
| GO:0006979                            | response to oxidative stress                                                | 1                                          | 20                    | 0.154583884 |
| GO:0006457                            | protein folding                                                             | 1                                          | 20                    | 0.162441718 |
| GO:0000166                            | nucleotide binding                                                          | 1                                          | 20                    | 0.171366344 |
| GO:0009733                            | response to auxin stimulus                                                  | 1                                          | 20                    | 0.173868849 |
| GO:0005783                            | endoplasmic reticulum                                                       | 1                                          | 20                    | 0.199476876 |



| Cluster 57<br>GO identifier<br>(con.) | Description                       | #<br>Associated<br>to the GO<br>in Cluster | Total # in<br>Cluster | p-value     |
|---------------------------------------|-----------------------------------|--------------------------------------------|-----------------------|-------------|
| GO:0005515                            | protein binding                   | 2                                          | 20                    | 0.216591408 |
| GO:0006952                            | defense response                  | 1                                          | 20                    | 0.231937555 |
| GO:0016020                            | membrane                          | 2                                          | 20                    | 0.23679704  |
| GO:0006499                            | N-terminal protein myristoylation | 1                                          | 20                    | 0.242121865 |
| GO:0005634                            | nucleus                           | 2                                          | 20                    | 0.27382333  |
| GO:0005737                            | cytoplasm                         | 1                                          | 20                    | 0.275433475 |
| GO:0005773                            | vacuole                           | 1                                          | 20                    | 0.282731363 |

### Cluster 57

| <u>GO Identifier</u> | <u>#Loci</u> | <u>Associated Loci (Left to Right)</u> |           |           |           |           |           |
|----------------------|--------------|----------------------------------------|-----------|-----------|-----------|-----------|-----------|
| GO:0000166           | 1            | AT1G18080                              |           |           |           |           |           |
| GO:0000275           | 1            | AT5G47030                              |           |           |           |           |           |
| GO:0000774           | 1            | AT4G26780                              |           |           |           |           |           |
| GO:0003735           | 2            | AT1G08360                              | AT3G09200 |           |           |           |           |
| GO:0003993           | 1            | AT1G09870                              |           |           |           |           |           |
| GO:0004001           | 1            | AT3G09820                              |           |           |           |           |           |
| GO:0004055           | 1            | AT4G24830                              |           |           |           |           |           |
| GO:0004148           | 1            | AT4G16155                              |           |           |           |           |           |
| GO:0004252           | 1            | AT2G47390                              |           |           |           |           |           |
| GO:0004364           | 2            | AT1G78380                              | AT2G47730 |           |           |           |           |
| GO:0005200           | 1            | AT5G09810                              |           |           |           |           |           |
| GO:0005507           | 1            | AT3G09820                              |           |           |           |           |           |
| GO:0005515           | 2            | AT4G26780                              | AT5G38480 |           |           |           |           |
| GO:0005524           | 2            | AT4G24830                              | AT5G38480 |           |           |           |           |
| GO:0005618           | 2            | AT5G09810                              | AT5G38480 |           |           |           |           |
| GO:0005634           | 2            | AT2G47730                              | AT3G09200 |           |           |           |           |
| GO:0005730           | 2            | AT3G09200                              | AT5G09810 |           |           |           |           |
| GO:0005737           | 1            | AT1G78380                              |           |           |           |           |           |
| GO:0005739           | 5            | AT3G19170                              | AT4G12590 | AT5G09810 | AT5G38480 | AT5G47030 |           |
| GO:0005753           | 1            | AT5G47030                              |           |           |           |           |           |
| GO:0005773           | 1            | AT5G38480                              |           |           |           |           |           |
| GO:0005783           | 1            | AT4G12590                              |           |           |           |           |           |
| GO:0005829           | 1            | AT3G09820                              |           |           |           |           |           |
| GO:0005834           | 1            | AT1G18080                              |           |           |           |           |           |
| GO:0005840           | 2            | AT1G08360                              | AT3G09200 |           |           |           |           |
| GO:0005856           | 1            | AT5G09810                              |           |           |           |           |           |
| GO:0005886           | 8            | AT1G08360                              | AT1G09870 | AT1G78380 | AT2G47730 | AT3G09200 | AT3G09820 |
|                      |              | AT5G09810                              | AT5G38480 |           |           |           |           |
| GO:0006169           | 1            | AT3G09820                              |           |           |           |           |           |
| GO:0006412           | 2            | AT1G08360                              | AT3G09200 |           |           |           |           |
| GO:0006414           | 1            | AT3G09200                              |           |           |           |           |           |
| GO:0006457           | 1            | AT4G26780                              |           |           |           |           |           |
| GO:0006499           | 1            | AT2G47730                              |           |           |           |           |           |
| GO:0006508           | 2            | AT2G47390                              | AT3G19170 |           |           |           |           |
| GO:0006526           | 1            | AT4G24830                              |           |           |           |           |           |
| GO:0006886           | 1            | AT3G07680                              |           |           |           |           |           |
| GO:0006952           | 1            | AT2G47730                              |           |           |           |           |           |
| GO:0006979           | 1            | AT1G78380                              |           |           |           |           |           |
| GO:0007010           | 1            | AT5G09810                              |           |           |           |           |           |
| GO:0008236           | 1            | AT2G47390                              |           |           |           |           |           |
| GO:0008320           | 1            | AT3G07680                              |           |           |           |           |           |
| GO:0009407           | 2            | AT1G78380                              | AT2G47730 |           |           |           |           |
| GO:0009409           | 2            | AT2G47730                              | AT3G09200 |           |           |           |           |
| GO:0009416           | 1            | AT5G09810                              |           |           |           |           |           |
| GO:0009507           | 10           | AT1G18080                              | AT1G78380 | AT2G47390 | AT2G47730 | AT3G09200 | AT3G09820 |
|                      |              | AT3G19170                              | AT4G16155 | AT4G24830 | AT5G38480 |           |           |

**Cluster 57 (con.)**

| <b>GO Identifier</b> | <b>#Loci</b> | <b>Associated Loci (Left to Right)</b> |           |           |           |           |
|----------------------|--------------|----------------------------------------|-----------|-----------|-----------|-----------|
| GO:0009570           | 5            | AT1G78380                              | AT2G47390 | AT2G47730 | AT3G19170 | AT4G24830 |
| GO:0009579           | 1            | AT2G47730                              |           |           |           |           |
| GO:0009611           | 1            | AT5G09810                              |           |           |           |           |
| GO:0009651           | 3            | AT2G47730                              | AT3G09200 | AT5G47030 |           |           |
| GO:0009733           | 1            | AT5G09810                              |           |           |           |           |
| GO:0009845           | 1            | AT5G09810                              |           |           |           |           |
| GO:0009941           | 3            | AT2G47730                              | AT3G19170 | AT4G16155 |           |           |
| GO:0010319           | 1            | AT2G47730                              |           |           |           |           |
| GO:0016020           | 2            | AT3G07680                              | AT3G09820 |           |           |           |
| GO:0022625           | 1            | AT1G08360                              |           |           |           |           |
| GO:0022626           | 3            | AT1G08360                              | AT1G18080 | AT3G09200 |           |           |
| GO:0042631           | 1            | AT1G78380                              |           |           |           |           |
| GO:0042742           | 1            | AT2G47730                              |           |           |           |           |
| GO:0042803           | 1            | AT4G26780                              |           |           |           |           |
| GO:0043295           | 2            | AT1G78380                              | AT2G47730 |           |           |           |
| GO:0045309           | 1            | AT5G38480                              |           |           |           |           |
| GO:0045454           | 1            | AT4G16155                              |           |           |           |           |
| GO:0046686           | 4            | AT1G18080                              | AT1G78380 | AT3G09820 | AT3G19170 |           |
| GO:0046933           | 1            | AT5G47030                              |           |           |           |           |
| GO:0048046           | 2            | AT3G09820                              | AT3G19170 |           |           |           |
| GO:0048364           | 1            | AT5G09810                              |           |           |           |           |
| GO:0051087           | 1            | AT4G26780                              |           |           |           |           |
| GO:0051605           | 1            | AT3G19170                              |           |           |           |           |

**Cluster 58**

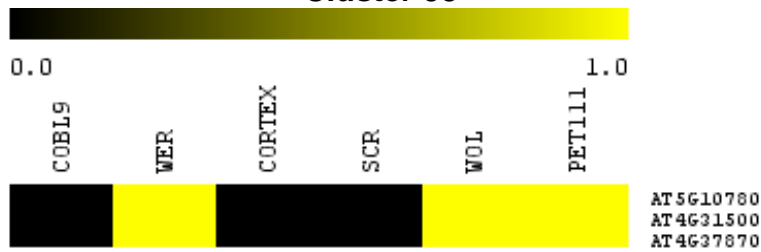

**Cluster 58**  
 AT4G31500  
 AT4G37870  
 AT5G10780

| Cluster 58<br>GO identifier | Description                                                                                                                                                                | #<br>Associated<br>to the GO<br>in Cluster | Total # in<br>Cluster | p-value     |
|-----------------------------|----------------------------------------------------------------------------------------------------------------------------------------------------------------------------|--------------------------------------------|-----------------------|-------------|
| GO:0004612                  | phosphoenolpyruvate carboxykinase (ATP) activity                                                                                                                           | 1                                          | 3                     | 1.44E-04    |
| GO:0048830                  | adventitious root development                                                                                                                                              | 1                                          | 3                     | 5.75E-04    |
| GO:0009759                  | indole glucosinolate biosynthetic process                                                                                                                                  | 1                                          | 3                     | 8.63E-04    |
| GO:0016709                  | oxidoreductase activity, acting on paired donors, with incorporation or reduction of molecular oxygen, NADH or NADPH as one donor, and incorporation of one atom of oxygen | 1                                          | 3                     | 8.63E-04    |
| GO:0009684                  | indoleacetic acid biosynthetic process                                                                                                                                     | 1                                          | 3                     | 0.001006373 |
| GO:0009641                  | shade avoidance                                                                                                                                                            | 1                                          | 3                     | 0.001150031 |
| GO:0006094                  | gluconeogenesis                                                                                                                                                            | 1                                          | 3                     | 0.00129366  |
| GO:0052544                  | callose deposition in cell wall during defense response                                                                                                                    | 1                                          | 3                     | 0.002298296 |
| GO:0000162                  | tryptophan biosynthetic process                                                                                                                                            | 1                                          | 3                     | 0.002728441 |
| GO:0010114                  | response to red light                                                                                                                                                      | 1                                          | 3                     | 0.005732514 |
| GO:0016020                  | membrane                                                                                                                                                                   | 2                                          | 3                     | 0.011499264 |

| Cluster 58<br>GO identifier<br>(con.) | Description                   | #<br>Associated<br>to the GO<br>in Cluster | Total # in<br>Cluster | p-value     |
|---------------------------------------|-------------------------------|--------------------------------------------|-----------------------|-------------|
| GO:0042742                            | defense response to bacterium | 1                                          | 3                     | 0.01903086  |
| GO:0019825                            | oxygen binding                | 1                                          | 3                     | 0.027115656 |
| GO:0005730                            | nucleolus                     | 1                                          | 3                     | 0.033462623 |
| GO:0005783                            | endoplasmic reticulum         | 1                                          | 3                     | 0.037161276 |
| GO:0046686                            | response to cadmium ion       | 1                                          | 3                     | 0.038935069 |
| GO:0005524                            | ATP binding                   | 1                                          | 3                     | 0.084606448 |
| GO:0005739                            | mitochondrion                 | 1                                          | 3                     | 0.102623018 |
| GO:0005886                            | plasma membrane               | 1                                          | 3                     | 0.203214985 |
| GO:0005575                            | cellular_component            | 1                                          | 3                     | 0.422237836 |
| GO:0003674                            | molecular_function            | 1                                          | 3                     | 0.424399891 |
| GO:0008150                            | biological_process            | 1                                          | 3                     | 0.443314275 |

### Cluster 58

**GO Identifier #Loci Associated Loci (Left to Right)**

|            |   |                     |
|------------|---|---------------------|
| GO:0000162 | 1 | AT4G31500           |
| GO:0003674 | 1 | AT5G10780           |
| GO:0004612 | 1 | AT4G37870           |
| GO:0005524 | 1 | AT4G37870           |
| GO:0005575 | 1 | AT5G10780           |
| GO:0005730 | 1 | AT4G37870           |
| GO:0005739 | 1 | AT4G31500           |
| GO:0005783 | 1 | AT4G31500           |
| GO:0005886 | 1 | AT4G31500           |
| GO:0006094 | 1 | AT4G37870           |
| GO:0008150 | 1 | AT5G10780           |
| GO:0009641 | 1 | AT4G31500           |
| GO:0009684 | 1 | AT4G31500           |
| GO:0009759 | 1 | AT4G31500           |
| GO:0010114 | 1 | AT4G31500           |
| GO:0016020 | 2 | AT4G31500 AT4G37870 |
| GO:0016709 | 1 | AT4G31500           |
| GO:0019825 | 1 | AT4G31500           |
| GO:0042742 | 1 | AT4G31500           |
| GO:0046686 | 1 | AT4G37870           |
| GO:0048830 | 1 | AT4G31500           |
| GO:0052544 | 1 | AT4G31500           |

### Cluster 59

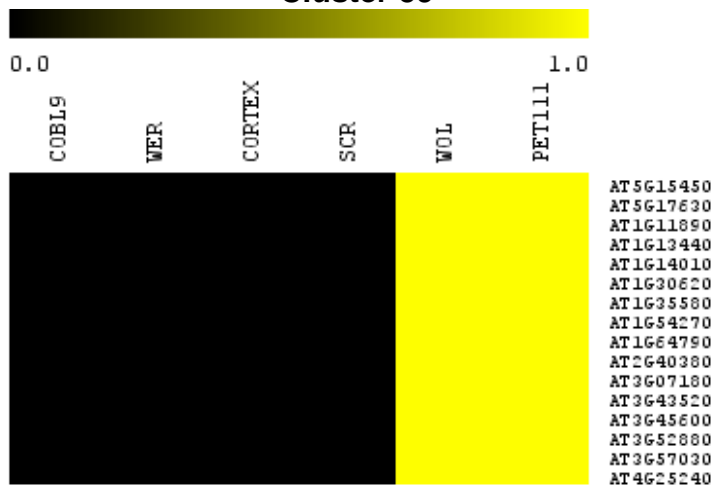

**Cluster 59**

AT1G11890  
 AT1G13440  
 AT1G14010  
 AT1G30620  
 AT1G35580  
 AT1G54270  
 AT1G64790  
 AT2G40380  
 AT3G07180  
 AT3G43520  
 AT3G45600  
 AT3G52880  
 AT3G57030  
 AT4G25240  
 AT5G15450  
 AT5G17630

| Cluster 59<br>GO identifier | Description                                       | #<br>Associated<br>to the GO<br>in Cluster | Total # in<br>Cluster | p-value     |
|-----------------------------|---------------------------------------------------|--------------------------------------------|-----------------------|-------------|
| GO:0005886                  | plasma membrane                                   | 9                                          | 16                    | 8.45E-07    |
| GO:0005782                  | peroxisomal matrix                                | 1                                          | 16                    | 7.67E-04    |
| GO:0019567                  | arabinose biosynthetic process                    | 1                                          | 16                    | 7.67E-04    |
| GO:0050373                  | UDP-arabinose 4-epimerase activity                | 1                                          | 16                    | 7.67E-04    |
| GO:0005783                  | endoplasmic reticulum                             | 3                                          | 16                    | 9.64E-04    |
| GO:0046686                  | response to cadmium ion                           | 3                                          | 16                    | 0.001104278 |
| GO:0015712                  | hexose phosphate transport                        | 1                                          | 16                    | 0.002298296 |
| GO:0016656                  | monodehydroascorbate reductase (NADH) activity    | 1                                          | 16                    | 0.003062191 |
| GO:0005355                  | glucose transmembrane transporter activity        | 1                                          | 16                    | 0.003824985 |
| GO:0008943                  | glyceraldehyde-3-phosphate dehydrogenase activity | 1                                          | 16                    | 0.003824985 |
| GO:0042744                  | hydrogen peroxide catabolic process               | 1                                          | 16                    | 0.003824985 |
| GO:0005794                  | Golgi apparatus                                   | 2                                          | 16                    | 0.004120354 |
| GO:0006094                  | gluconeogenesis                                   | 1                                          | 16                    | 0.00686518  |
| GO:0005829                  | cytosol                                           | 2                                          | 16                    | 0.007236366 |
| GO:0004564                  | beta-fructofuranosidase activity                  | 1                                          | 16                    | 0.008378704 |
| GO:0009821                  | alkaloid biosynthetic process                     | 1                                          | 16                    | 0.009133827 |
| GO:0016844                  | strictosidine synthase activity                   | 1                                          | 16                    | 0.010640799 |
| GO:0018119                  | peptidyl-cysteine S-nitrosylation                 | 1                                          | 16                    | 0.010640799 |
| GO:0009532                  | plastid stroma                                    | 1                                          | 16                    | 0.012143413 |
| GO:0006520                  | amino acid metabolic process                      | 1                                          | 16                    | 0.01289309  |
| GO:0009225                  | nucleotide-sugar metabolic process                | 1                                          | 16                    | 0.01364168  |
| GO:0016020                  | membrane                                          | 4                                          | 16                    | 0.013786955 |
| GO:0009832                  | plant-type cell wall biogenesis                   | 1                                          | 16                    | 0.018110476 |
| GO:0009507                  | chloroplast                                       | 5                                          | 16                    | 0.020914181 |
| GO:0009658                  | chloroplast organization                          | 1                                          | 16                    | 0.026931842 |
| GO:0006096                  | glycolysis                                        | 1                                          | 16                    | 0.032006674 |
| GO:0015297                  | antiporter activity                               | 1                                          | 16                    | 0.032727411 |
| GO:0007568                  | aging                                             | 1                                          | 16                    | 0.03344709  |
| GO:0046658                  | anchored to plasma membrane                       | 1                                          | 16                    | 0.044116207 |
| GO:0008026                  | ATP-dependent helicase activity                   | 1                                          | 16                    | 0.049710525 |
| GO:0003743                  | translation initiation factor activity            | 1                                          | 16                    | 0.051098772 |
| GO:0016192                  | vesicle-mediated transport                        | 1                                          | 16                    | 0.055238845 |
| GO:0009408                  | response to heat                                  | 1                                          | 16                    | 0.067439032 |
| GO:0005507                  | copper ion binding                                | 1                                          | 16                    | 0.075391365 |

| Cluster 59<br>GO identifier<br>(con.) | Description                    | #<br>Associated<br>to the GO<br>in Cluster | Total # in<br>Cluster | p-value     |
|---------------------------------------|--------------------------------|--------------------------------------------|-----------------------|-------------|
| GO:0005777                            | peroxisome                     | 1                                          | 16                    | 0.07866258  |
| GO:0016887                            | ATPase activity                | 1                                          | 16                    | 0.080613459 |
| GO:0042742                            | defense response to bacterium  | 1                                          | 16                    | 0.093394364 |
| GO:0006979                            | response to oxidative stress   | 1                                          | 16                    | 0.12830716  |
| GO:0031225                            | anchored to membrane           | 1                                          | 16                    | 0.135707028 |
| GO:0005215                            | transporter activity           | 1                                          | 16                    | 0.146250651 |
| GO:0005730                            | nucleolus                      | 1                                          | 16                    | 0.15381657  |
| GO:0009505                            | plant-type cell wall           | 1                                          | 16                    | 0.15381657  |
| GO:0048046                            | apoplast                       | 1                                          | 16                    | 0.155415703 |
| GO:0005975                            | carbohydrate metabolic process | 1                                          | 16                    | 0.184352888 |
| GO:0005618                            | cell wall                      | 1                                          | 16                    | 0.186763112 |
| GO:0009570                            | chloroplast stroma             | 1                                          | 16                    | 0.210213463 |
| GO:0003824                            | catalytic activity             | 1                                          | 16                    | 0.217155629 |
| GO:0009941                            | chloroplast envelope           | 1                                          | 16                    | 0.217155629 |
| GO:0005634                            | nucleus                        | 2                                          | 16                    | 0.24332888  |
| GO:0005488                            | binding                        | 1                                          | 16                    | 0.246438751 |
| GO:0005524                            | ATP binding                    | 1                                          | 16                    | 0.303962515 |
| GO:0005739                            | mitochondrion                  | 1                                          | 16                    | 0.335980303 |

#### Cluster 59

| <u>GO Identifier</u> | <u>#Loci</u> | <u>Associated Loci (Left to Right)</u> |           |           |           |           |           |  |
|----------------------|--------------|----------------------------------------|-----------|-----------|-----------|-----------|-----------|--|
| GO:0003743           | 1            | AT1G54270                              |           |           |           |           |           |  |
| GO:0003824           | 1            | AT1G30620                              |           |           |           |           |           |  |
| GO:0004564           | 1            | AT1G35580                              |           |           |           |           |           |  |
| GO:0005215           | 1            | AT1G11890                              |           |           |           |           |           |  |
| GO:0005355           | 1            | AT5G17630                              |           |           |           |           |           |  |
| GO:0005488           | 1            | AT1G64790                              |           |           |           |           |           |  |
| GO:0005507           | 1            | AT4G25240                              |           |           |           |           |           |  |
| GO:0005524           | 1            | AT5G15450                              |           |           |           |           |           |  |
| GO:0005618           | 1            | AT1G13440                              |           |           |           |           |           |  |
| GO:0005634           | 2            | AT1G13440                              | AT1G35580 |           |           |           |           |  |
| GO:0005730           | 1            | AT1G13440                              |           |           |           |           |           |  |
| GO:0005739           | 1            | AT1G13440                              |           |           |           |           |           |  |
| GO:0005777           | 1            | AT3G52880                              |           |           |           |           |           |  |
| GO:0005782           | 1            | AT3G52880                              |           |           |           |           |           |  |
| GO:0005783           | 3            | AT1G11890                              | AT3G07180 | AT3G57030 |           |           |           |  |
| GO:0005794           | 2            | AT1G11890                              | AT1G30620 |           |           |           |           |  |
| GO:0005829           | 2            | AT1G13440                              | AT1G35580 |           |           |           |           |  |
| GO:0005886           | 9            | AT1G11890                              | AT1G13440 | AT1G35580 | AT1G54270 | AT3G07180 | AT3G45600 |  |
|                      |              | AT3G52880                              | AT3G57030 | AT4G25240 |           |           |           |  |
| GO:0005975           | 1            | AT1G35580                              |           |           |           |           |           |  |
| GO:0006094           | 1            | AT1G13440                              |           |           |           |           |           |  |
| GO:0006096           | 1            | AT1G13440                              |           |           |           |           |           |  |
| GO:0006520           | 1            | AT1G35580                              |           |           |           |           |           |  |
| GO:0006979           | 1            | AT1G13440                              |           |           |           |           |           |  |
| GO:0007568           | 1            | AT3G45600                              |           |           |           |           |           |  |
| GO:0008026           | 1            | AT1G54270                              |           |           |           |           |           |  |
| GO:0008943           | 1            | AT1G13440                              |           |           |           |           |           |  |
| GO:0009225           | 1            | AT1G30620                              |           |           |           |           |           |  |
| GO:0009408           | 1            | AT5G15450                              |           |           |           |           |           |  |
| GO:0009505           | 1            | AT3G57030                              |           |           |           |           |           |  |
| GO:0009507           | 5            | AT1G13440                              | AT3G43520 | AT3G52880 | AT5G15450 | AT5G17630 |           |  |
| GO:0009532           | 1            | AT5G15450                              |           |           |           |           |           |  |
| GO:0009570           | 1            | AT5G15450                              |           |           |           |           |           |  |
| GO:0009658           | 1            | AT5G15450                              |           |           |           |           |           |  |

**Cluster 59 (con.)**

| <b>GO Identifier</b> | <b>#Loci</b> | <b>Associated Loci (Left to Right)</b> |           |           |           |
|----------------------|--------------|----------------------------------------|-----------|-----------|-----------|
| GO:0009821           | 1            | AT3G57030                              |           |           |           |
| GO:0009832           | 1            | AT1G30620                              |           |           |           |
| GO:0009941           | 1            | AT3G43520                              |           |           |           |
| GO:0015297           | 1            | AT5G17630                              |           |           |           |
| GO:0015712           | 1            | AT5G17630                              |           |           |           |
| GO:0016020           | 4            | AT1G11890                              | AT1G13440 | AT1G35580 | AT1G64790 |
| GO:0016192           | 1            | AT1G11890                              |           |           |           |
| GO:0016656           | 1            | AT3G52880                              |           |           |           |
| GO:0016844           | 1            | AT3G57030                              |           |           |           |
| GO:0016887           | 1            | AT5G15450                              |           |           |           |
| GO:0018119           | 1            | AT3G52880                              |           |           |           |
| GO:0019567           | 1            | AT1G30620                              |           |           |           |
| GO:0031225           | 1            | AT4G25240                              |           |           |           |
| GO:0042742           | 1            | AT1G13440                              |           |           |           |
| GO:0042744           | 1            | AT3G52880                              |           |           |           |
| GO:0046658           | 1            | AT4G25240                              |           |           |           |
| GO:0046686           | 3            | AT1G13440                              | AT1G54270 | AT3G52880 |           |
| GO:0048046           | 1            | AT3G52880                              |           |           |           |
| GO:0050373           | 1            | AT1G30620                              |           |           |           |

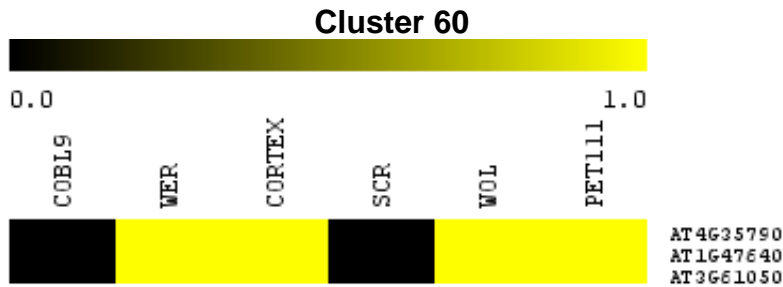

**Cluster 60**  
AT1G47640  
AT3G61050  
AT4G35790

| Cluster 60<br>GO identifier | Description                         | #<br>Associated<br>to the GO<br>in Cluster | Total # in<br>Cluster | p-value     |
|-----------------------------|-------------------------------------|--------------------------------------------|-----------------------|-------------|
| GO:0046473                  | phosphatidic acid metabolic process | 1                                          | 3                     | 1.44E-04    |
| GO:0015630                  | microtubule cytoskeleton            | 1                                          | 3                     | 5.75E-04    |
| GO:0012501                  | programmed cell death               | 1                                          | 3                     | 0.001437263 |
| GO:0004630                  | phospholipase D activity            | 1                                          | 3                     | 0.001724384 |
| GO:0009409                  | response to cold                    | 1                                          | 3                     | 0.026561027 |
| GO:0005773                  | vacuole                             | 1                                          | 3                     | 0.061052959 |
| GO:0005739                  | mitochondrion                       | 1                                          | 3                     | 0.102623018 |
| GO:0016020                  | membrane                            | 1                                          | 3                     | 0.168256477 |
| GO:0005886                  | plasma membrane                     | 1                                          | 3                     | 0.203214985 |
| GO:0003674                  | molecular_function                  | 1                                          | 3                     | 0.424399891 |
| GO:0008150                  | biological_process                  | 1                                          | 3                     | 0.443314275 |

**Cluster 60**

| <b>GO Identifier</b> | <b>#Loci</b> | <b>Associated Loci (Left to Right)</b> |
|----------------------|--------------|----------------------------------------|
| GO:0003674           | 1            | AT1G47640                              |
| GO:0004630           | 1            | AT4G35790                              |
| GO:0005739           | 1            | AT1G47640                              |
| GO:0005773           | 1            | AT4G35790                              |

**Cluster 60 (con.)**

| <b><u>GO Identifier</u></b> | <b><u>#Loci</u></b> | <b><u>Associated Loci (Left to Right)</u></b> |
|-----------------------------|---------------------|-----------------------------------------------|
| GO:0005886                  | 1                   | AT4G35790                                     |
| GO:0008150                  | 1                   | AT1G47640                                     |
| GO:0009409                  | 1                   | AT4G35790                                     |
| GO:0012501                  | 1                   | AT4G35790                                     |
| GO:0015630                  | 1                   | AT4G35790                                     |
| GO:0016020                  | 1                   | AT4G35790                                     |
| GO:0046473                  | 1                   | AT4G35790                                     |

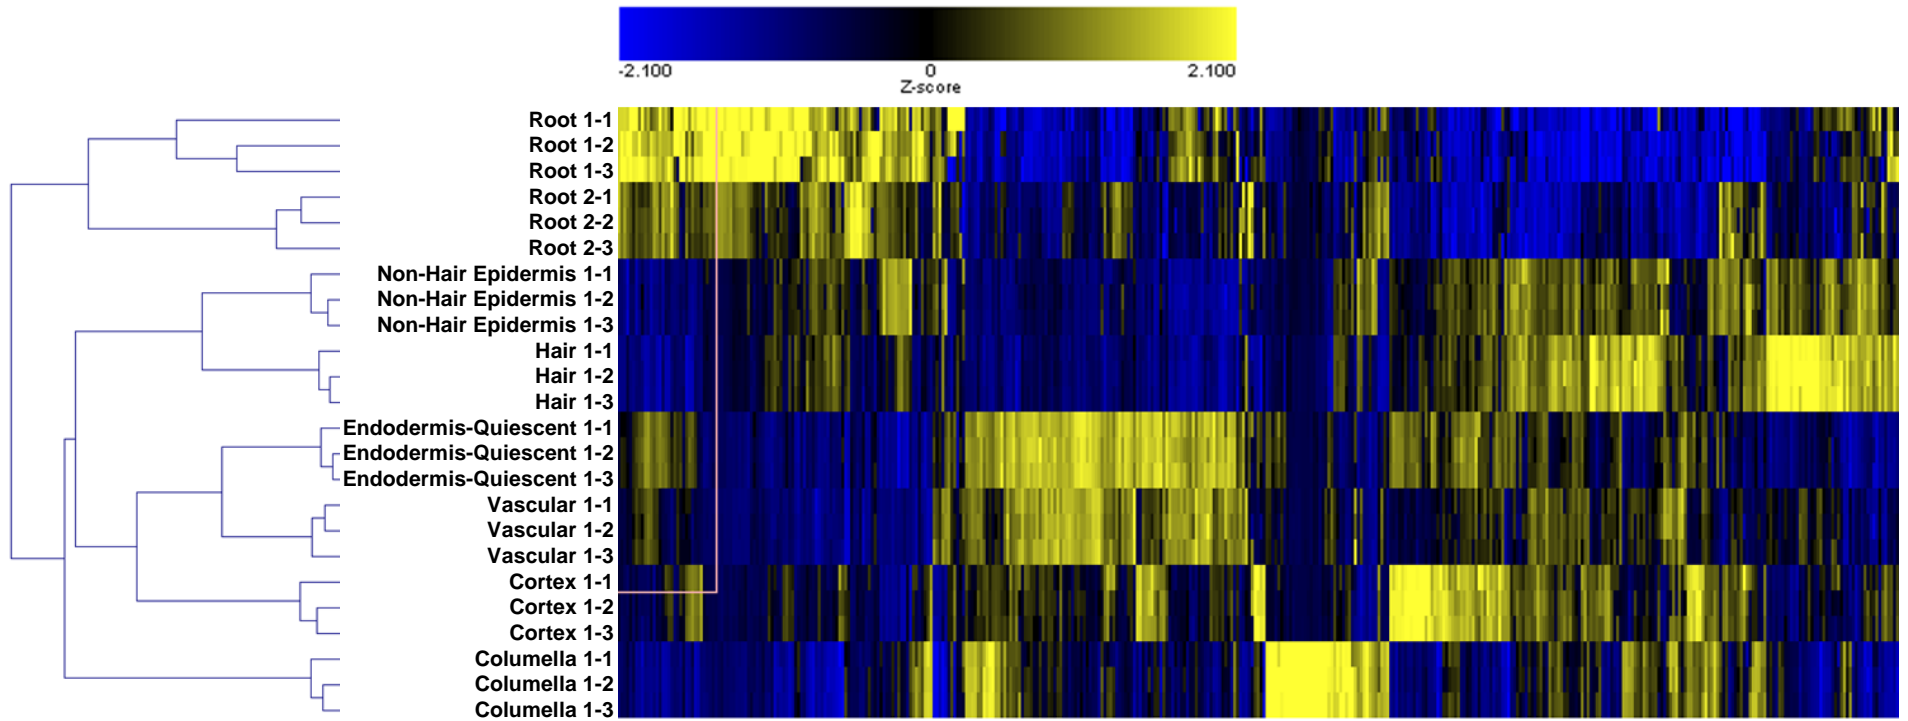

**Supplementary Figure S6.** Clustering of samples profiled by peak-integration proteomics.

A heat map of the unsupervised agglomerative cluster of samples profiled by peak-integration proteomics is shown. The y-axis shows technical and/or biological replicates of: whole sorted wild-type roots (Roots 1 and 2), non-hair epidermal cells, hair cells, endodermal/quiescent cells, cortex cells, and columella cells. The columns of the y-axis are Z-score protein expression values. Blue and yellow represent over 2-fold positive and negative enrichment, respectively. Note that technical replicates of the same sample cluster together, as do the biological replicates of whole wild-type roots. Striking differences between cell type profiles are visible; similarities between certain cell types are as well. For example, the epidermal hair and non-hair cells cluster together.



**Supplementary Table S1.** Raw data output from the Trans-Proteomic Pipeline of LTQ runs performed for the root cellular proteome. Tranche hash:  
2vxeLdEgJYUtGS1qbaktSbd1JuYRLQAHeB3YfAeF+F/ZfEiZwzE2ctZqD76Ocvsy  
uTHRXEWyWvO4KbhVIZYZHj36TEEAAAAAAAAAADxQ==

These raw data have been uploaded for public release and access at the Proteome Commons and are found at [www.proteomecommons.org/tranche](http://www.proteomecommons.org/tranche) under the project “The Protein Expression Landscape of the *Arabidopsis* Root”. The data files for Supplementary Table S1, which include all raw data of the root cellular proteome, were too large for the file formats allowed in the Supplementary Information section. Thus, these data are found at Proteome Commons under the aforementioned project title and are accessible with the following Tranche hash:

2vxeLdEgJYUtGS1qbaktSbd1JuYRLQAHeB3YfAeF+F/ZfEiZwzE2ctZqD76Ocvsy  
uTHRXEWyWvO4KbhVIZYZHj36TEEAAAAAAAAAADxQ==

All encryption at the tranche repository should be removed, but if a passphrase is requested, it is 'arabidopsis'.

A direct link to this table at the Proteome Commons is the following:  
<https://proteomecommons.org/dataset.jsp?i=76689>

Supplementary Table S1 can also be found at the Duke Genome Express Repository at the following link:

[https://discovery.genome.duke.edu/express/resources/2010/Final\\_Supplementary\\_Table\\_S1.xls](https://discovery.genome.duke.edu/express/resources/2010/Final_Supplementary_Table_S1.xls)

**Supplementary Tables pertaining to Figure 1**

**Supplementary Table S2. The 1,995 proteins of the root cellular proteome**

| <b>Locus</b> | <b>Root Hairs<br/>(COBL9)</b> | <b>Non-Hair<br/>Epidermis<br/>(WER)</b> | <b>Cortex<br/>(CORTEX)</b> | <b>Endodermis<br/>/Quiescent<br/>(SCR)</b> | <b>Vasculature<br/>(WOL)</b> | <b>Columella<br/>(PET111)</b> |
|--------------|-------------------------------|-----------------------------------------|----------------------------|--------------------------------------------|------------------------------|-------------------------------|
| AT1G01040    | 0                             | 0                                       | 0                          | 0                                          | 1                            | 0                             |
| AT1G01090    | 1                             | 1                                       | 1                          | 1                                          | 1                            | 1                             |
| AT1G01100    | 0                             | 0                                       | 0                          | 1                                          | 0                            | 0                             |
| AT1G01180    | 0                             | 0                                       | 0                          | 0                                          | 0                            | 1                             |
| AT1G01820    | 1                             | 0                                       | 0                          | 0                                          | 1                            | 1                             |
| AT1G01910    | 1                             | 0                                       | 0                          | 0                                          | 0                            | 0                             |
| AT1G01950    | 0                             | 1                                       | 0                          | 0                                          | 0                            | 0                             |
| AT1G01960    | 0                             | 0                                       | 1                          | 0                                          | 0                            | 0                             |
| AT1G02420    | 0                             | 0                                       | 1                          | 0                                          | 0                            | 0                             |
| AT1G02500    | 0                             | 0                                       | 1                          | 1                                          | 1                            | 0                             |
| AT1G02560    | 0                             | 0                                       | 0                          | 1                                          | 0                            | 1                             |
| AT1G03230    | 0                             | 1                                       | 0                          | 0                                          | 0                            | 0                             |
| AT1G03330    | 1                             | 0                                       | 0                          | 0                                          | 1                            | 0                             |
| AT1G03860    | 1                             | 1                                       | 1                          | 1                                          | 1                            | 1                             |
| AT1G03880    | 0                             | 0                                       | 0                          | 0                                          | 1                            | 0                             |
| AT1G04040    | 1                             | 0                                       | 1                          | 0                                          | 1                            | 0                             |
| AT1G04120    | 1                             | 0                                       | 1                          | 0                                          | 1                            | 0                             |
| AT1G04170    | 1                             | 0                                       | 0                          | 0                                          | 1                            | 0                             |
| AT1G04270    | 1                             | 0                                       | 0                          | 1                                          | 0                            | 1                             |
| AT1G04410    | 1                             | 1                                       | 1                          | 1                                          | 1                            | 1                             |
| AT1G04430    | 1                             | 1                                       | 1                          | 1                                          | 1                            | 0                             |
| AT1G04690    | 0                             | 0                                       | 0                          | 0                                          | 1                            | 0                             |
| AT1G04810    | 1                             | 0                                       | 0                          | 0                                          | 0                            | 0                             |
| AT1G04850    | 0                             | 0                                       | 0                          | 0                                          | 1                            | 0                             |
| AT1G04910    | 0                             | 1                                       | 1                          | 0                                          | 1                            | 0                             |
| AT1G04980    | 1                             | 0                                       | 1                          | 0                                          | 1                            | 1                             |
| AT1G05260    | 0                             | 0                                       | 0                          | 1                                          | 0                            | 0                             |
| AT1G05500    | 1                             | 0                                       | 0                          | 0                                          | 0                            | 1                             |
| AT1G05620    | 1                             | 0                                       | 0                          | 0                                          | 0                            | 0                             |
| AT1G06000    | 0                             | 0                                       | 0                          | 0                                          | 1                            | 0                             |
| AT1G06220    | 1                             | 0                                       | 0                          | 0                                          | 1                            | 0                             |
| AT1G06290    | 1                             | 1                                       | 1                          | 1                                          | 1                            | 1                             |
| AT1G06400    | 1                             | 0                                       | 0                          | 0                                          | 1                            | 0                             |
| AT1G06430    | 0                             | 0                                       | 1                          | 0                                          | 0                            | 0                             |
| AT1G06530    | 1                             | 0                                       | 1                          | 0                                          | 1                            | 0                             |
| AT1G06800    | 0                             | 0                                       | 1                          | 0                                          | 0                            | 0                             |
| AT1G06890    | 1                             | 0                                       | 0                          | 0                                          | 0                            | 0                             |
| AT1G06900    | 1                             | 0                                       | 0                          | 0                                          | 1                            | 0                             |
| AT1G06950    | 1                             | 1                                       | 1                          | 1                                          | 1                            | 1                             |
| AT1G07410    | 0                             | 1                                       | 0                          | 0                                          | 0                            | 0                             |
| AT1G07670    | 1                             | 1                                       | 0                          | 1                                          | 1                            | 1                             |
| AT1G07750    | 0                             | 0                                       | 0                          | 0                                          | 1                            | 0                             |
| AT1G07790    | 0                             | 0                                       | 0                          | 1                                          | 0                            | 0                             |
| AT1G07810    | 1                             | 1                                       | 1                          | 0                                          | 1                            | 0                             |
| AT1G07890    | 1                             | 0                                       | 1                          | 0                                          | 1                            | 1                             |
| AT1G07960    | 0                             | 0                                       | 1                          | 0                                          | 0                            | 1                             |
| AT1G08110    | 1                             | 0                                       | 0                          | 0                                          | 1                            | 1                             |
| AT1G08200    | 0                             | 0                                       | 0                          | 1                                          | 1                            | 0                             |
| AT1G08220    | 1                             | 0                                       | 0                          | 0                                          | 1                            | 0                             |

**Supplementary Tables pertaining to Figure 1**

**Supplementary Table S2. The 1,995 proteins of the root cellular proteome**

| <b>Locus</b> | <b>Root Hairs<br/>(COBL9)</b> | <b>Non-Hair<br/>Epidermis<br/>(WER)</b> | <b>Cortex<br/>(CORTEX)</b> | <b>Endodermis<br/>/Quiescent<br/>(SCR)</b> | <b>Vasculature<br/>(WOL)</b> | <b>Columella<br/>(PET111)</b> |
|--------------|-------------------------------|-----------------------------------------|----------------------------|--------------------------------------------|------------------------------|-------------------------------|
| AT1G08360    | 1                             | 1                                       | 0                          | 1                                          | 1                            | 1                             |
| AT1G08450    | 1                             | 0                                       | 0                          | 0                                          | 0                            | 0                             |
| AT1G08470    | 1                             | 0                                       | 0                          | 0                                          | 1                            | 1                             |
| AT1G08480    | 0                             | 0                                       | 0                          | 1                                          | 1                            | 1                             |
| AT1G08640    | 0                             | 0                                       | 0                          | 0                                          | 1                            | 0                             |
| AT1G08830    | 1                             | 0                                       | 1                          | 0                                          | 1                            | 1                             |
| AT1G08840    | 0                             | 0                                       | 0                          | 0                                          | 1                            | 0                             |
| AT1G09210    | 1                             | 1                                       | 1                          | 1                                          | 1                            | 1                             |
| AT1G09270    | 1                             | 0                                       | 0                          | 0                                          | 1                            | 0                             |
| AT1G09620    | 0                             | 1                                       | 0                          | 1                                          | 1                            | 0                             |
| AT1G09630    | 1                             | 0                                       | 1                          | 0                                          | 1                            | 0                             |
| AT1G09640    | 1                             | 0                                       | 1                          | 1                                          | 1                            | 1                             |
| AT1G09760    | 1                             | 0                                       | 0                          | 0                                          | 1                            | 0                             |
| AT1G09780    | 1                             | 0                                       | 1                          | 1                                          | 1                            | 1                             |
| AT1G09830    | 1                             | 0                                       | 0                          | 0                                          | 1                            | 0                             |
| AT1G09850    | 1                             | 0                                       | 1                          | 0                                          | 1                            | 0                             |
| AT1G09870    | 1                             | 1                                       | 0                          | 1                                          | 1                            | 1                             |
| AT1G10130    | 1                             | 0                                       | 0                          | 0                                          | 1                            | 1                             |
| AT1G10270    | 1                             | 0                                       | 0                          | 0                                          | 1                            | 0                             |
| AT1G10290    | 1                             | 0                                       | 0                          | 1                                          | 1                            | 1                             |
| AT1G10510    | 0                             | 1                                       | 0                          | 0                                          | 0                            | 0                             |
| AT1G10590    | 1                             | 0                                       | 0                          | 0                                          | 1                            | 0                             |
| AT1G10670    | 0                             | 0                                       | 0                          | 1                                          | 0                            | 0                             |
| AT1G10760    | 1                             | 1                                       | 0                          | 1                                          | 0                            | 1                             |
| AT1G10840    | 0                             | 0                                       | 0                          | 1                                          | 1                            | 0                             |
| AT1G10950    | 1                             | 1                                       | 1                          | 1                                          | 1                            | 1                             |
| AT1G11580    | 0                             | 0                                       | 1                          | 1                                          | 1                            | 0                             |
| AT1G11680    | 1                             | 1                                       | 1                          | 1                                          | 1                            | 0                             |
| AT1G11840    | 1                             | 0                                       | 1                          | 1                                          | 1                            | 1                             |
| AT1G11860    | 1                             | 1                                       | 1                          | 1                                          | 1                            | 1                             |
| AT1G11890    | 0                             | 0                                       | 0                          | 0                                          | 1                            | 1                             |
| AT1G11910    | 1                             | 1                                       | 1                          | 1                                          | 1                            | 1                             |
| AT1G12000    | 0                             | 0                                       | 1                          | 1                                          | 1                            | 0                             |
| AT1G12230    | 1                             | 1                                       | 1                          | 1                                          | 1                            | 1                             |
| AT1G12240    | 1                             | 0                                       | 1                          | 0                                          | 1                            | 0                             |
| AT1G12310    | 0                             | 0                                       | 0                          | 0                                          | 1                            | 0                             |
| AT1G12640    | 1                             | 0                                       | 1                          | 0                                          | 0                            | 0                             |
| AT1G12840    | 1                             | 1                                       | 1                          | 1                                          | 1                            | 1                             |
| AT1G13000    | 1                             | 0                                       | 0                          | 0                                          | 0                            | 1                             |
| AT1G13060    | 1                             | 0                                       | 0                          | 0                                          | 1                            | 0                             |
| AT1G13280    | 1                             | 1                                       | 1                          | 1                                          | 1                            | 1                             |
| AT1G13440    | 0                             | 0                                       | 0                          | 0                                          | 1                            | 1                             |
| AT1G13560    | 0                             | 0                                       | 0                          | 0                                          | 1                            | 0                             |
| AT1G14010    | 0                             | 0                                       | 0                          | 0                                          | 1                            | 1                             |
| AT1G14060    | 1                             | 0                                       | 0                          | 0                                          | 0                            | 0                             |
| AT1G14080    | 1                             | 1                                       | 0                          | 0                                          | 1                            | 1                             |
| AT1G14210    | 1                             | 0                                       | 0                          | 0                                          | 0                            | 0                             |
| AT1G14220    | 1                             | 0                                       | 0                          | 0                                          | 1                            | 0                             |
| AT1G14290    | 0                             | 0                                       | 0                          | 1                                          | 0                            | 0                             |

**Supplementary Tables pertaining to Figure 1**

**Supplementary Table S2. The 1,995 proteins of the root cellular proteome**

| <b>Locus</b> | <b>Root Hairs<br/>(COBL9)</b> | <b>Non-Hair<br/>Epidermis<br/>(WER)</b> | <b>Cortex<br/>(CORTEX)</b> | <b>Endodermis<br/>/Quiescent<br/>(SCR)</b> | <b>Vasculature<br/>(WOL)</b> | <b>Columella<br/>(PET111)</b> |
|--------------|-------------------------------|-----------------------------------------|----------------------------|--------------------------------------------|------------------------------|-------------------------------|
| AT1G14320    | 0                             | 0                                       | 0                          | 1                                          | 0                            | 0                             |
| AT1G14360    | 1                             | 1                                       | 1                          | 0                                          | 0                            | 0                             |
| AT1G14410    | 1                             | 0                                       | 1                          | 1                                          | 1                            | 0                             |
| AT1G14610    | 1                             | 0                                       | 0                          | 0                                          | 1                            | 0                             |
| AT1G14620    | 1                             | 0                                       | 0                          | 0                                          | 1                            | 0                             |
| AT1G14670    | 1                             | 0                                       | 1                          | 0                                          | 1                            | 0                             |
| AT1G14710    | 1                             | 0                                       | 0                          | 0                                          | 0                            | 0                             |
| AT1G14810    | 1                             | 1                                       | 1                          | 1                                          | 1                            | 1                             |
| AT1G14830    | 1                             | 1                                       | 1                          | 0                                          | 1                            | 1                             |
| AT1G14850    | 1                             | 0                                       | 0                          | 0                                          | 1                            | 0                             |
| AT1G14980    | 1                             | 0                                       | 1                          | 1                                          | 1                            | 1                             |
| AT1G15120    | 1                             | 0                                       | 1                          | 0                                          | 0                            | 0                             |
| AT1G15210    | 1                             | 0                                       | 1                          | 1                                          | 1                            | 0                             |
| AT1G15480    | 1                             | 1                                       | 0                          | 0                                          | 1                            | 0                             |
| AT1G15500    | 1                             | 1                                       | 1                          | 1                                          | 1                            | 1                             |
| AT1G15690    | 1                             | 1                                       | 1                          | 1                                          | 1                            | 1                             |
| AT1G15710    | 1                             | 0                                       | 0                          | 0                                          | 0                            | 0                             |
| AT1G15750    | 0                             | 0                                       | 0                          | 0                                          | 1                            | 0                             |
| AT1G15930    | 1                             | 0                                       | 0                          | 1                                          | 1                            | 1                             |
| AT1G16300    | 1                             | 0                                       | 0                          | 0                                          | 0                            | 0                             |
| AT1G16350    | 0                             | 0                                       | 0                          | 0                                          | 1                            | 0                             |
| AT1G16560    | 0                             | 0                                       | 1                          | 0                                          | 0                            | 0                             |
| AT1G16700    | 0                             | 0                                       | 0                          | 1                                          | 1                            | 1                             |
| AT1G16870    | 1                             | 0                                       | 0                          | 0                                          | 1                            | 0                             |
| AT1G16890    | 0                             | 0                                       | 0                          | 0                                          | 1                            | 0                             |
| AT1G16920    | 1                             | 0                                       | 0                          | 0                                          | 1                            | 0                             |
| AT1G17160    | 1                             | 0                                       | 0                          | 0                                          | 0                            | 0                             |
| AT1G17180    | 1                             | 0                                       | 0                          | 0                                          | 0                            | 1                             |
| AT1G17190    | 1                             | 0                                       | 0                          | 0                                          | 0                            | 1                             |
| AT1G17290    | 1                             | 1                                       | 1                          | 1                                          | 1                            | 1                             |
| AT1G17745    | 1                             | 1                                       | 0                          | 0                                          | 1                            | 0                             |
| AT1G17890    | 1                             | 0                                       | 0                          | 0                                          | 0                            | 0                             |
| AT1G18080    | 1                             | 1                                       | 0                          | 1                                          | 1                            | 1                             |
| AT1G18260    | 1                             | 1                                       | 1                          | 0                                          | 1                            | 0                             |
| AT1G18500    | 1                             | 1                                       | 0                          | 0                                          | 1                            | 0                             |
| AT1G18540    | 1                             | 0                                       | 1                          | 1                                          | 1                            | 0                             |
| AT1G18630    | 1                             | 0                                       | 0                          | 0                                          | 1                            | 0                             |
| AT1G18640    | 1                             | 0                                       | 0                          | 1                                          | 0                            | 0                             |
| AT1G18700    | 1                             | 0                                       | 0                          | 0                                          | 1                            | 0                             |
| AT1G19130    | 1                             | 0                                       | 0                          | 0                                          | 0                            | 0                             |
| AT1G19140    | 1                             | 0                                       | 0                          | 0                                          | 0                            | 0                             |
| AT1G19360    | 1                             | 1                                       | 1                          | 1                                          | 1                            | 1                             |
| AT1G19370    | 0                             | 0                                       | 1                          | 0                                          | 1                            | 1                             |
| AT1G19440    | 0                             | 0                                       | 0                          | 0                                          | 1                            | 0                             |
| AT1G19520    | 1                             | 1                                       | 0                          | 0                                          | 1                            | 0                             |
| AT1G19580    | 1                             | 0                                       | 1                          | 1                                          | 0                            | 1                             |
| AT1G19800    | 0                             | 0                                       | 0                          | 0                                          | 1                            | 0                             |
| AT1G19900    | 0                             | 0                                       | 0                          | 0                                          | 1                            | 0                             |
| AT1G19920    | 0                             | 0                                       | 0                          | 0                                          | 1                            | 0                             |

**Supplementary Tables pertaining to Figure 1**  
**Supplementary Table S2. The 1,995 proteins of the root cellular proteome**

| Locus     | Root Hairs<br>(COBL9) | Non-Hair<br>Epidermis<br>(WER) | Cortex<br>(CORTEX) | Endodermis<br>/Quiescent<br>(SCR) | Vasculature<br>(WOL) | Columella<br>(PET111) |
|-----------|-----------------------|--------------------------------|--------------------|-----------------------------------|----------------------|-----------------------|
| AT1G20050 | 1                     | 1                              | 0                  | 1                                 | 0                    | 1                     |
| AT1G20090 | 0                     | 0                              | 0                  | 0                                 | 1                    | 0                     |
| AT1G20200 | 1                     | 0                              | 0                  | 0                                 | 1                    | 0                     |
| AT1G20230 | 1                     | 0                              | 0                  | 0                                 | 0                    | 0                     |
| AT1G20300 | 0                     | 1                              | 0                  | 0                                 | 0                    | 0                     |
| AT1G20330 | 1                     | 1                              | 1                  | 1                                 | 1                    | 1                     |
| AT1G20430 | 1                     | 0                              | 1                  | 0                                 | 1                    | 1                     |
| AT1G20450 | 0                     | 0                              | 0                  | 0                                 | 0                    | 1                     |
| AT1G20510 | 1                     | 1                              | 0                  | 0                                 | 0                    | 0                     |
| AT1G20560 | 1                     | 0                              | 0                  | 0                                 | 0                    | 0                     |
| AT1G20575 | 1                     | 0                              | 1                  | 1                                 | 1                    | 1                     |
| AT1G20580 | 1                     | 0                              | 0                  | 0                                 | 1                    | 0                     |
| AT1G20620 | 0                     | 0                              | 1                  | 0                                 | 0                    | 0                     |
| AT1G20630 | 0                     | 0                              | 0                  | 0                                 | 0                    | 1                     |
| AT1G20840 | 1                     | 0                              | 0                  | 1                                 | 0                    | 0                     |
| AT1G20950 | 0                     | 0                              | 0                  | 0                                 | 1                    | 0                     |
| AT1G20960 | 1                     | 0                              | 0                  | 0                                 | 1                    | 1                     |
| AT1G21160 | 0                     | 0                              | 0                  | 0                                 | 1                    | 0                     |
| AT1G21370 | 1                     | 0                              | 0                  | 0                                 | 0                    | 0                     |
| AT1G21560 | 1                     | 0                              | 0                  | 0                                 | 0                    | 0                     |
| AT1G21650 | 1                     | 0                              | 1                  | 0                                 | 0                    | 0                     |
| AT1G21690 | 0                     | 0                              | 0                  | 0                                 | 1                    | 0                     |
| AT1G21720 | 0                     | 1                              | 0                  | 1                                 | 0                    | 0                     |
| AT1G21750 | 1                     | 1                              | 1                  | 1                                 | 1                    | 1                     |
| AT1G21900 | 1                     | 0                              | 1                  | 0                                 | 0                    | 1                     |
| AT1G22200 | 0                     | 0                              | 0                  | 0                                 | 1                    | 0                     |
| AT1G22300 | 1                     | 1                              | 1                  | 1                                 | 1                    | 1                     |
| AT1G22410 | 1                     | 1                              | 1                  | 1                                 | 1                    | 0                     |
| AT1G22450 | 1                     | 1                              | 1                  | 0                                 | 1                    | 0                     |
| AT1G22460 | 0                     | 0                              | 0                  | 0                                 | 1                    | 0                     |
| AT1G22520 | 1                     | 0                              | 1                  | 1                                 | 0                    | 0                     |
| AT1G22530 | 0                     | 0                              | 1                  | 0                                 | 1                    | 0                     |
| AT1G22840 | 1                     | 0                              | 1                  | 0                                 | 1                    | 1                     |
| AT1G23100 | 1                     | 0                              | 0                  | 0                                 | 1                    | 0                     |
| AT1G23170 | 1                     | 0                              | 0                  | 0                                 | 0                    | 0                     |
| AT1G23190 | 1                     | 0                              | 0                  | 0                                 | 1                    | 1                     |
| AT1G23310 | 0                     | 0                              | 0                  | 0                                 | 0                    | 1                     |
| AT1G23820 | 1                     | 0                              | 1                  | 1                                 | 1                    | 0                     |
| AT1G24090 | 0                     | 0                              | 0                  | 0                                 | 0                    | 1                     |
| AT1G24180 | 1                     | 1                              | 1                  | 1                                 | 1                    | 1                     |
| AT1G24280 | 0                     | 1                              | 0                  | 0                                 | 0                    | 0                     |
| AT1G24360 | 1                     | 1                              | 1                  | 1                                 | 1                    | 1                     |
| AT1G24510 | 1                     | 0                              | 0                  | 1                                 | 1                    | 0                     |
| AT1G25375 | 1                     | 0                              | 0                  | 0                                 | 1                    | 0                     |
| AT1G25380 | 1                     | 0                              | 0                  | 0                                 | 0                    | 0                     |
| AT1G25490 | 1                     | 0                              | 0                  | 0                                 | 1                    | 0                     |
| AT1G26160 | 1                     | 0                              | 0                  | 0                                 | 0                    | 0                     |
| AT1G26460 | 1                     | 1                              | 1                  | 0                                 | 1                    | 0                     |
| AT1G26630 | 1                     | 0                              | 0                  | 0                                 | 1                    | 1                     |

**Supplementary Tables pertaining to Figure 1**  
**Supplementary Table S2. The 1,995 proteins of the root cellular proteome**

| <b>Locus</b> | <b>Root Hairs<br/>(COBL9)</b> | <b>Non-Hair<br/>Epidermis<br/>(WER)</b> | <b>Cortex<br/>(CORTEX)</b> | <b>Endodermis<br/>/Quiescent<br/>(SCR)</b> | <b>Vasculature<br/>(WOL)</b> | <b>Columella<br/>(PET111)</b> |
|--------------|-------------------------------|-----------------------------------------|----------------------------|--------------------------------------------|------------------------------|-------------------------------|
| AT1G26850    | 1                             | 1                                       | 1                          | 1                                          | 1                            | 1                             |
| AT1G26940    | 1                             | 0                                       | 1                          | 0                                          | 1                            | 0                             |
| AT1G27310    | 0                             | 0                                       | 0                          | 0                                          | 1                            | 0                             |
| AT1G27390    | 1                             | 0                                       | 0                          | 0                                          | 1                            | 0                             |
| AT1G27400    | 1                             | 0                                       | 1                          | 1                                          | 0                            | 0                             |
| AT1G27450    | 1                             | 0                                       | 0                          | 0                                          | 0                            | 1                             |
| AT1G27680    | 1                             | 0                                       | 1                          | 0                                          | 0                            | 0                             |
| AT1G27770    | 1                             | 1                                       | 1                          | 0                                          | 0                            | 1                             |
| AT1G27930    | 1                             | 1                                       | 1                          | 1                                          | 1                            | 0                             |
| AT1G27970    | 0                             | 0                                       | 0                          | 0                                          | 1                            | 0                             |
| AT1G27980    | 0                             | 0                                       | 1                          | 0                                          | 0                            | 0                             |
| AT1G28130    | 0                             | 0                                       | 0                          | 0                                          | 0                            | 1                             |
| AT1G28440    | 0                             | 1                                       | 0                          | 0                                          | 0                            | 0                             |
| AT1G28510    | 0                             | 0                                       | 0                          | 0                                          | 0                            | 1                             |
| AT1G29020    | 0                             | 0                                       | 1                          | 0                                          | 0                            | 0                             |
| AT1G29150    | 1                             | 0                                       | 0                          | 1                                          | 1                            | 0                             |
| AT1G29250    | 1                             | 0                                       | 0                          | 0                                          | 0                            | 0                             |
| AT1G29330    | 0                             | 1                                       | 0                          | 0                                          | 0                            | 0                             |
| AT1G29470    | 1                             | 1                                       | 1                          | 1                                          | 1                            | 1                             |
| AT1G29790    | 1                             | 1                                       | 1                          | 0                                          | 1                            | 1                             |
| AT1G29880    | 1                             | 0                                       | 0                          | 0                                          | 1                            | 0                             |
| AT1G29900    | 1                             | 1                                       | 1                          | 1                                          | 1                            | 1                             |
| AT1G29940    | 1                             | 0                                       | 0                          | 1                                          | 0                            | 0                             |
| AT1G30000    | 1                             | 0                                       | 1                          | 0                                          | 1                            | 0                             |
| AT1G30120    | 0                             | 0                                       | 0                          | 1                                          | 0                            | 1                             |
| AT1G30230    | 0                             | 0                                       | 0                          | 1                                          | 1                            | 0                             |
| AT1G30360    | 0                             | 0                                       | 1                          | 0                                          | 1                            | 1                             |
| AT1G30400    | 1                             | 1                                       | 0                          | 0                                          | 1                            | 1                             |
| AT1G30450    | 1                             | 0                                       | 0                          | 0                                          | 0                            | 0                             |
| AT1G30510    | 1                             | 1                                       | 1                          | 1                                          | 1                            | 1                             |
| AT1G30580    | 0                             | 0                                       | 0                          | 1                                          | 1                            | 0                             |
| AT1G30620    | 0                             | 0                                       | 0                          | 0                                          | 1                            | 1                             |
| AT1G30630    | 1                             | 0                                       | 0                          | 1                                          | 1                            | 1                             |
| AT1G30690    | 0                             | 0                                       | 0                          | 0                                          | 1                            | 0                             |
| AT1G30870    | 1                             | 0                                       | 0                          | 0                                          | 0                            | 0                             |
| AT1G31180    | 1                             | 1                                       | 1                          | 0                                          | 1                            | 1                             |
| AT1G31220    | 1                             | 0                                       | 0                          | 0                                          | 1                            | 0                             |
| AT1G31230    | 0                             | 1                                       | 0                          | 1                                          | 0                            | 1                             |
| AT1G31730    | 0                             | 0                                       | 0                          | 0                                          | 1                            | 0                             |
| AT1G31812    | 0                             | 0                                       | 0                          | 0                                          | 0                            | 1                             |
| AT1G31817    | 1                             | 1                                       | 1                          | 0                                          | 1                            | 0                             |
| AT1G31850    | 1                             | 1                                       | 1                          | 0                                          | 1                            | 0                             |
| AT1G31860    | 1                             | 0                                       | 0                          | 0                                          | 0                            | 0                             |
| AT1G31950    | 0                             | 1                                       | 0                          | 0                                          | 0                            | 0                             |
| AT1G32380    | 1                             | 1                                       | 0                          | 0                                          | 0                            | 0                             |
| AT1G32400    | 0                             | 0                                       | 0                          | 1                                          | 0                            | 0                             |
| AT1G32440    | 1                             | 0                                       | 1                          | 0                                          | 0                            | 0                             |
| AT1G32900    | 0                             | 0                                       | 0                          | 0                                          | 0                            | 1                             |
| AT1G33040    | 0                             | 0                                       | 0                          | 0                                          | 1                            | 0                             |

**Supplementary Tables pertaining to Figure 1**  
**Supplementary Table S2. The 1,995 proteins of the root cellular proteome**

| <b>Locus</b> | <b>Root Hairs<br/>(COBL9)</b> | <b>Non-Hair<br/>Epidermis<br/>(WER)</b> | <b>Cortex<br/>(CORTEX)</b> | <b>Endodermis<br/>/Quiescent<br/>(SCR)</b> | <b>Vasculature<br/>(WOL)</b> | <b>Columella<br/>(PET111)</b> |
|--------------|-------------------------------|-----------------------------------------|----------------------------|--------------------------------------------|------------------------------|-------------------------------|
| AT1G33230    | 0                             | 0                                       | 0                          | 0                                          | 0                            | 1                             |
| AT1G33680    | 0                             | 0                                       | 0                          | 0                                          | 1                            | 0                             |
| AT1G33750    | 1                             | 1                                       | 0                          | 0                                          | 0                            | 1                             |
| AT1G33800    | 1                             | 1                                       | 0                          | 0                                          | 1                            | 0                             |
| AT1G33810    | 0                             | 0                                       | 0                          | 0                                          | 1                            | 0                             |
| AT1G34130    | 1                             | 1                                       | 1                          | 1                                          | 1                            | 1                             |
| AT1G34430    | 1                             | 1                                       | 1                          | 1                                          | 1                            | 1                             |
| AT1G35160    | 1                             | 0                                       | 1                          | 1                                          | 1                            | 0                             |
| AT1G35580    | 0                             | 0                                       | 0                          | 0                                          | 1                            | 1                             |
| AT1G35620    | 1                             | 1                                       | 1                          | 1                                          | 1                            | 1                             |
| AT1G35720    | 1                             | 1                                       | 1                          | 1                                          | 1                            | 1                             |
| AT1G36050    | 0                             | 0                                       | 1                          | 0                                          | 0                            | 0                             |
| AT1G41880    | 0                             | 0                                       | 0                          | 1                                          | 0                            | 0                             |
| AT1G42960    | 1                             | 0                                       | 0                          | 0                                          | 1                            | 1                             |
| AT1G43170    | 1                             | 0                                       | 1                          | 1                                          | 1                            | 1                             |
| AT1G43890    | 1                             | 1                                       | 0                          | 0                                          | 1                            | 0                             |
| AT1G44170    | 1                             | 0                                       | 1                          | 0                                          | 1                            | 1                             |
| AT1G44835    | 0                             | 0                                       | 0                          | 0                                          | 1                            | 0                             |
| AT1G47128    | 0                             | 0                                       | 1                          | 0                                          | 0                            | 0                             |
| AT1G47260    | 1                             | 1                                       | 1                          | 1                                          | 1                            | 1                             |
| AT1G47290    | 1                             | 1                                       | 1                          | 0                                          | 1                            | 0                             |
| AT1G47420    | 1                             | 0                                       | 1                          | 0                                          | 1                            | 1                             |
| AT1G47600    | 0                             | 0                                       | 0                          | 0                                          | 0                            | 1                             |
| AT1G47640    | 0                             | 1                                       | 1                          | 0                                          | 1                            | 1                             |
| AT1G48030    | 1                             | 1                                       | 1                          | 1                                          | 1                            | 1                             |
| AT1G48200    | 0                             | 0                                       | 0                          | 1                                          | 0                            | 0                             |
| AT1G48230    | 1                             | 0                                       | 0                          | 0                                          | 0                            | 0                             |
| AT1G48600    | 0                             | 0                                       | 0                          | 1                                          | 0                            | 0                             |
| AT1G48610    | 1                             | 0                                       | 0                          | 0                                          | 0                            | 0                             |
| AT1G48630    | 1                             | 0                                       | 0                          | 1                                          | 1                            | 0                             |
| AT1G48850    | 1                             | 1                                       | 0                          | 1                                          | 0                            | 1                             |
| AT1G48860    | 1                             | 0                                       | 0                          | 1                                          | 0                            | 0                             |
| AT1G48900    | 1                             | 0                                       | 0                          | 0                                          | 0                            | 0                             |
| AT1G48920    | 1                             | 1                                       | 0                          | 0                                          | 1                            | 0                             |
| AT1G49140    | 1                             | 0                                       | 0                          | 0                                          | 0                            | 0                             |
| AT1G49300    | 0                             | 0                                       | 0                          | 0                                          | 0                            | 1                             |
| AT1G49410    | 0                             | 0                                       | 0                          | 0                                          | 1                            | 0                             |
| AT1G49630    | 0                             | 1                                       | 0                          | 0                                          | 0                            | 0                             |
| AT1G49670    | 1                             | 0                                       | 0                          | 0                                          | 0                            | 1                             |
| AT1G49760    | 1                             | 0                                       | 0                          | 1                                          | 1                            | 0                             |
| AT1G50030    | 0                             | 0                                       | 0                          | 0                                          | 1                            | 0                             |
| AT1G50110    | 0                             | 0                                       | 0                          | 0                                          | 1                            | 0                             |
| AT1G50140    | 1                             | 0                                       | 0                          | 0                                          | 0                            | 0                             |
| AT1G50200    | 1                             | 0                                       | 1                          | 1                                          | 1                            | 0                             |
| AT1G50380    | 0                             | 1                                       | 1                          | 0                                          | 1                            | 0                             |
| AT1G50430    | 1                             | 0                                       | 1                          | 1                                          | 0                            | 0                             |
| AT1G50500    | 1                             | 0                                       | 0                          | 0                                          | 0                            | 0                             |
| AT1G50510    | 1                             | 0                                       | 0                          | 0                                          | 1                            | 0                             |
| AT1G50700    | 0                             | 0                                       | 1                          | 0                                          | 0                            | 0                             |

**Supplementary Tables pertaining to Figure 1**  
**Supplementary Table S2. The 1,995 proteins of the root cellular proteome**

| Locus     | Root Hairs<br>(COBL9) | Non-Hair<br>Epidermis<br>(WER) | Cortex<br>(CORTEX) | Endodermis<br>/Quiescent<br>(SCR) | Vasculature<br>(WOL) | Columella<br>(PET111) |
|-----------|-----------------------|--------------------------------|--------------------|-----------------------------------|----------------------|-----------------------|
| AT1G50940 | 0                     | 1                              | 0                  | 0                                 | 0                    | 0                     |
| AT1G51160 | 0                     | 0                              | 0                  | 0                                 | 1                    | 0                     |
| AT1G51570 | 0                     | 0                              | 1                  | 0                                 | 1                    | 0                     |
| AT1G51630 | 1                     | 1                              | 1                  | 0                                 | 1                    | 0                     |
| AT1G51650 | 0                     | 0                              | 0                  | 0                                 | 0                    | 1                     |
| AT1G51710 | 0                     | 0                              | 0                  | 0                                 | 1                    | 0                     |
| AT1G51980 | 1                     | 1                              | 1                  | 1                                 | 1                    | 1                     |
| AT1G52060 | 1                     | 1                              | 0                  | 0                                 | 0                    | 0                     |
| AT1G52070 | 1                     | 1                              | 0                  | 0                                 | 1                    | 1                     |
| AT1G52280 | 0                     | 0                              | 0                  | 0                                 | 0                    | 1                     |
| AT1G52360 | 1                     | 0                              | 1                  | 0                                 | 1                    | 0                     |
| AT1G52600 | 1                     | 0                              | 1                  | 1                                 | 1                    | 1                     |
| AT1G52670 | 1                     | 1                              | 0                  | 0                                 | 0                    | 0                     |
| AT1G52740 | 0                     | 0                              | 0                  | 0                                 | 1                    | 0                     |
| AT1G52760 | 0                     | 0                              | 1                  | 0                                 | 1                    | 0                     |
| AT1G52780 | 1                     | 0                              | 1                  | 0                                 | 1                    | 0                     |
| AT1G53000 | 1                     | 1                              | 1                  | 0                                 | 1                    | 1                     |
| AT1G53210 | 1                     | 1                              | 0                  | 1                                 | 0                    | 1                     |
| AT1G53240 | 1                     | 1                              | 1                  | 1                                 | 1                    | 1                     |
| AT1G53310 | 1                     | 0                              | 0                  | 1                                 | 1                    | 0                     |
| AT1G53645 | 1                     | 0                              | 0                  | 0                                 | 0                    | 0                     |
| AT1G53750 | 0                     | 0                              | 0                  | 1                                 | 1                    | 0                     |
| AT1G53760 | 1                     | 1                              | 1                  | 0                                 | 1                    | 1                     |
| AT1G53840 | 1                     | 1                              | 1                  | 0                                 | 1                    | 0                     |
| AT1G54000 | 1                     | 1                              | 1                  | 1                                 | 1                    | 1                     |
| AT1G54010 | 1                     | 1                              | 1                  | 0                                 | 1                    | 1                     |
| AT1G54030 | 1                     | 1                              | 1                  | 0                                 | 1                    | 1                     |
| AT1G54100 | 1                     | 0                              | 0                  | 0                                 | 1                    | 0                     |
| AT1G54220 | 1                     | 1                              | 0                  | 0                                 | 0                    | 0                     |
| AT1G54270 | 0                     | 0                              | 0                  | 0                                 | 1                    | 1                     |
| AT1G54320 | 1                     | 0                              | 0                  | 0                                 | 0                    | 1                     |
| AT1G54550 | 0                     | 0                              | 1                  | 0                                 | 0                    | 0                     |
| AT1G54990 | 0                     | 1                              | 1                  | 0                                 | 1                    | 0                     |
| AT1G55160 | 1                     | 0                              | 0                  | 0                                 | 0                    | 1                     |
| AT1G55490 | 1                     | 0                              | 0                  | 1                                 | 1                    | 0                     |
| AT1G55850 | 1                     | 1                              | 1                  | 0                                 | 0                    | 0                     |
| AT1G55890 | 1                     | 1                              | 1                  | 0                                 | 1                    | 0                     |
| AT1G55900 | 1                     | 1                              | 1                  | 0                                 | 1                    | 1                     |
| AT1G56070 | 1                     | 1                              | 1                  | 1                                 | 1                    | 1                     |
| AT1G56110 | 1                     | 1                              | 0                  | 1                                 | 1                    | 0                     |
| AT1G56190 | 1                     | 1                              | 1                  | 1                                 | 1                    | 0                     |
| AT1G56330 | 1                     | 1                              | 1                  | 0                                 | 0                    | 1                     |
| AT1G56340 | 1                     | 1                              | 1                  | 1                                 | 1                    | 1                     |
| AT1G56423 | 1                     | 0                              | 0                  | 1                                 | 0                    | 0                     |
| AT1G56450 | 1                     | 0                              | 0                  | 1                                 | 1                    | 1                     |
| AT1G56550 | 1                     | 0                              | 0                  | 0                                 | 0                    | 0                     |
| AT1G57620 | 0                     | 1                              | 0                  | 0                                 | 0                    | 1                     |
| AT1G57720 | 1                     | 1                              | 1                  | 1                                 | 1                    | 1                     |
| AT1G58080 | 1                     | 0                              | 1                  | 0                                 | 0                    | 0                     |



**Supplementary Tables pertaining to Figure 1**  
**Supplementary Table S2. The 1,995 proteins of the root cellular proteome**

| Locus     | Root Hairs<br>(COBL9) | Non-Hair<br>Epidermis<br>(WER) | Cortex<br>(CORTEX) | Endodermis<br>/Quiescent<br>(SCR) | Vasculature<br>(WOL) | Columella<br>(PET111) |
|-----------|-----------------------|--------------------------------|--------------------|-----------------------------------|----------------------|-----------------------|
| AT1G58270 | 1                     | 1                              | 1                  | 0                                 | 1                    | 1                     |
| AT1G59610 | 1                     | 1                              | 1                  | 1                                 | 1                    | 1                     |
| AT1G59780 | 0                     | 0                              | 1                  | 0                                 | 0                    | 0                     |
| AT1G59820 | 1                     | 0                              | 0                  | 0                                 | 1                    | 0                     |
| AT1G59900 | 1                     | 0                              | 0                  | 0                                 | 0                    | 1                     |
| AT1G60770 | 1                     | 1                              | 0                  | 0                                 | 1                    | 0                     |
| AT1G61730 | 0                     | 0                              | 0                  | 0                                 | 1                    | 0                     |
| AT1G61770 | 1                     | 1                              | 0                  | 0                                 | 1                    | 1                     |
| AT1G61790 | 1                     | 1                              | 1                  | 1                                 | 1                    | 1                     |
| AT1G61870 | 1                     | 1                              | 0                  | 0                                 | 1                    | 0                     |
| AT1G62020 | 1                     | 0                              | 1                  | 1                                 | 1                    | 1                     |
| AT1G62130 | 0                     | 0                              | 1                  | 0                                 | 0                    | 0                     |
| AT1G62330 | 0                     | 1                              | 1                  | 0                                 | 1                    | 0                     |
| AT1G62640 | 1                     | 1                              | 1                  | 1                                 | 1                    | 0                     |
| AT1G62660 | 1                     | 1                              | 1                  | 1                                 | 1                    | 1                     |
| AT1G62730 | 1                     | 0                              | 0                  | 0                                 | 0                    | 0                     |
| AT1G62810 | 1                     | 0                              | 0                  | 0                                 | 0                    | 0                     |
| AT1G63000 | 1                     | 1                              | 0                  | 0                                 | 1                    | 1                     |
| AT1G63010 | 1                     | 1                              | 0                  | 0                                 | 0                    | 0                     |
| AT1G63050 | 0                     | 0                              | 0                  | 1                                 | 0                    | 0                     |
| AT1G63110 | 1                     | 0                              | 0                  | 0                                 | 0                    | 0                     |
| AT1G63450 | 1                     | 0                              | 0                  | 0                                 | 0                    | 0                     |
| AT1G63660 | 0                     | 0                              | 0                  | 0                                 | 1                    | 0                     |
| AT1G63770 | 1                     | 0                              | 1                  | 1                                 | 1                    | 1                     |
| AT1G63940 | 1                     | 1                              | 1                  | 1                                 | 1                    | 1                     |
| AT1G64090 | 1                     | 1                              | 1                  | 1                                 | 1                    | 1                     |
| AT1G64190 | 1                     | 1                              | 1                  | 1                                 | 1                    | 1                     |
| AT1G64520 | 1                     | 0                              | 0                  | 0                                 | 1                    | 0                     |
| AT1G64650 | 1                     | 0                              | 1                  | 1                                 | 1                    | 1                     |
| AT1G64790 | 0                     | 0                              | 0                  | 0                                 | 1                    | 1                     |
| AT1G64850 | 0                     | 0                              | 0                  | 0                                 | 0                    | 1                     |
| AT1G64880 | 1                     | 1                              | 1                  | 1                                 | 1                    | 0                     |
| AT1G65020 | 0                     | 0                              | 0                  | 0                                 | 1                    | 0                     |
| AT1G65220 | 0                     | 0                              | 0                  | 0                                 | 1                    | 0                     |
| AT1G65260 | 0                     | 0                              | 0                  | 0                                 | 0                    | 1                     |
| AT1G65270 | 1                     | 1                              | 1                  | 1                                 | 1                    | 1                     |
| AT1G65540 | 1                     | 0                              | 0                  | 0                                 | 0                    | 0                     |
| AT1G65820 | 0                     | 0                              | 0                  | 0                                 | 0                    | 1                     |
| AT1G65930 | 1                     | 0                              | 1                  | 1                                 | 1                    | 1                     |
| AT1G66270 | 1                     | 1                              | 1                  | 1                                 | 1                    | 1                     |
| AT1G66280 | 1                     | 1                              | 1                  | 1                                 | 1                    | 1                     |
| AT1G66430 | 0                     | 0                              | 0                  | 0                                 | 1                    | 0                     |
| AT1G66580 | 1                     | 0                              | 0                  | 0                                 | 0                    | 0                     |
| AT1G66670 | 0                     | 0                              | 0                  | 1                                 | 0                    | 0                     |
| AT1G67120 | 0                     | 0                              | 0                  | 0                                 | 1                    | 0                     |
| AT1G67230 | 1                     | 0                              | 0                  | 0                                 | 1                    | 0                     |
| AT1G67330 | 1                     | 1                              | 1                  | 0                                 | 1                    | 0                     |
| AT1G67360 | 0                     | 1                              | 0                  | 0                                 | 1                    | 0                     |
| AT1G67430 | 0                     | 0                              | 0                  | 0                                 | 1                    | 0                     |

**Supplementary Tables pertaining to Figure 1**

**Supplementary Table S2. The 1,995 proteins of the root cellular proteome**

| <b>Locus</b> | <b>Root Hairs<br/>(COBL9)</b> | <b>Non-Hair<br/>Epidermis<br/>(WER)</b> | <b>Cortex<br/>(CORTEX)</b> | <b>Endodermis<br/>/Quiescent<br/>(SCR)</b> | <b>Vasculature<br/>(WOL)</b> | <b>Columella<br/>(PET111)</b> |
|--------------|-------------------------------|-----------------------------------------|----------------------------|--------------------------------------------|------------------------------|-------------------------------|
| AT1G67490    | 1                             | 0                                       | 1                          | 0                                          | 1                            | 0                             |
| AT1G67500    | 0                             | 0                                       | 1                          | 0                                          | 0                            | 0                             |
| AT1G67560    | 0                             | 1                                       | 0                          | 0                                          | 0                            | 0                             |
| AT1G67730    | 1                             | 1                                       | 1                          | 1                                          | 1                            | 1                             |
| AT1G67850    | 0                             | 0                                       | 0                          | 0                                          | 0                            | 1                             |
| AT1G67930    | 1                             | 0                                       | 0                          | 0                                          | 0                            | 0                             |
| AT1G69460    | 1                             | 1                                       | 0                          | 1                                          | 1                            | 1                             |
| AT1G69526    | 0                             | 0                                       | 0                          | 0                                          | 0                            | 1                             |
| AT1G69640    | 1                             | 0                                       | 0                          | 0                                          | 1                            | 0                             |
| AT1G69740    | 0                             | 0                                       | 1                          | 0                                          | 1                            | 0                             |
| AT1G69830    | 0                             | 0                                       | 0                          | 0                                          | 0                            | 1                             |
| AT1G70190    | 0                             | 1                                       | 0                          | 0                                          | 0                            | 0                             |
| AT1G70310    | 1                             | 0                                       | 0                          | 1                                          | 0                            | 0                             |
| AT1G70330    | 1                             | 0                                       | 1                          | 0                                          | 0                            | 0                             |
| AT1G70410    | 1                             | 0                                       | 0                          | 0                                          | 0                            | 0                             |
| AT1G70570    | 0                             | 0                                       | 1                          | 0                                          | 0                            | 0                             |
| AT1G70580    | 0                             | 0                                       | 0                          | 0                                          | 1                            | 0                             |
| AT1G70600    | 1                             | 0                                       | 1                          | 1                                          | 1                            | 1                             |
| AT1G70730    | 1                             | 0                                       | 0                          | 0                                          | 0                            | 0                             |
| AT1G70770    | 1                             | 1                                       | 1                          | 1                                          | 1                            | 1                             |
| AT1G70940    | 0                             | 0                                       | 0                          | 0                                          | 0                            | 1                             |
| AT1G71070    | 1                             | 0                                       | 1                          | 0                                          | 1                            | 0                             |
| AT1G71220    | 1                             | 1                                       | 1                          | 1                                          | 1                            | 1                             |
| AT1G71260    | 0                             | 1                                       | 0                          | 0                                          | 0                            | 0                             |
| AT1G71780    | 1                             | 0                                       | 0                          | 0                                          | 1                            | 0                             |
| AT1G72150    | 0                             | 0                                       | 0                          | 0                                          | 1                            | 0                             |
| AT1G72175    | 0                             | 0                                       | 0                          | 0                                          | 0                            | 1                             |
| AT1G72270    | 0                             | 0                                       | 1                          | 0                                          | 0                            | 1                             |
| AT1G72280    | 1                             | 0                                       | 0                          | 0                                          | 0                            | 0                             |
| AT1G72370    | 1                             | 0                                       | 1                          | 1                                          | 1                            | 1                             |
| AT1G72480    | 1                             | 0                                       | 0                          | 0                                          | 0                            | 0                             |
| AT1G72540    | 0                             | 0                                       | 0                          | 0                                          | 1                            | 0                             |
| AT1G72730    | 0                             | 0                                       | 1                          | 0                                          | 0                            | 0                             |
| AT1G72750    | 1                             | 0                                       | 1                          | 0                                          | 1                            | 0                             |
| AT1G72860    | 0                             | 0                                       | 1                          | 0                                          | 0                            | 0                             |
| AT1G73160    | 1                             | 0                                       | 0                          | 0                                          | 0                            | 0                             |
| AT1G73180    | 0                             | 0                                       | 0                          | 0                                          | 1                            | 0                             |
| AT1G73230    | 0                             | 0                                       | 0                          | 1                                          | 0                            | 0                             |
| AT1G73590    | 0                             | 0                                       | 0                          | 0                                          | 1                            | 0                             |
| AT1G73940    | 0                             | 0                                       | 1                          | 0                                          | 0                            | 0                             |
| AT1G74020    | 1                             | 1                                       | 1                          | 1                                          | 0                            | 1                             |
| AT1G74030    | 1                             | 1                                       | 0                          | 1                                          | 0                            | 1                             |
| AT1G74260    | 1                             | 1                                       | 1                          | 1                                          | 1                            | 0                             |
| AT1G74380    | 1                             | 1                                       | 1                          | 0                                          | 1                            | 0                             |
| AT1G74560    | 0                             | 0                                       | 0                          | 0                                          | 1                            | 0                             |
| AT1G74910    | 1                             | 0                                       | 0                          | 0                                          | 0                            | 0                             |
| AT1G74920    | 1                             | 0                                       | 0                          | 0                                          | 0                            | 0                             |
| AT1G74960    | 1                             | 1                                       | 0                          | 0                                          | 0                            | 0                             |
| AT1G75140    | 0                             | 0                                       | 1                          | 0                                          | 0                            | 0                             |

**Supplementary Tables pertaining to Figure 1**  
**Supplementary Table S2. The 1,995 proteins of the root cellular proteome**

| <b>Locus</b> | <b>Root Hairs<br/>(COBL9)</b> | <b>Non-Hair<br/>Epidermis<br/>(WER)</b> | <b>Cortex<br/>(CORTEX)</b> | <b>Endodermis<br/>/Quiescent<br/>(SCR)</b> | <b>Vasculature<br/>(WOL)</b> | <b>Columella<br/>(PET111)</b> |
|--------------|-------------------------------|-----------------------------------------|----------------------------|--------------------------------------------|------------------------------|-------------------------------|
| AT1G75220    | 0                             | 0                                       | 0                          | 1                                          | 0                            | 0                             |
| AT1G75270    | 1                             | 0                                       | 0                          | 1                                          | 0                            | 1                             |
| AT1G75280    | 0                             | 0                                       | 0                          | 0                                          | 1                            | 0                             |
| AT1G75330    | 1                             | 1                                       | 0                          | 0                                          | 1                            | 1                             |
| AT1G75640    | 0                             | 0                                       | 0                          | 0                                          | 1                            | 0                             |
| AT1G75680    | 0                             | 1                                       | 1                          | 0                                          | 1                            | 0                             |
| AT1G75780    | 1                             | 0                                       | 1                          | 0                                          | 0                            | 0                             |
| AT1G75940    | 1                             | 0                                       | 0                          | 0                                          | 0                            | 0                             |
| AT1G75990    | 0                             | 0                                       | 0                          | 0                                          | 1                            | 0                             |
| AT1G76010    | 1                             | 1                                       | 0                          | 0                                          | 0                            | 0                             |
| AT1G76030    | 0                             | 0                                       | 0                          | 0                                          | 0                            | 1                             |
| AT1G76090    | 1                             | 1                                       | 1                          | 1                                          | 1                            | 0                             |
| AT1G76140    | 1                             | 0                                       | 0                          | 0                                          | 1                            | 0                             |
| AT1G76200    | 0                             | 0                                       | 0                          | 0                                          | 0                            | 1                             |
| AT1G76400    | 1                             | 1                                       | 1                          | 1                                          | 1                            | 1                             |
| AT1G76490    | 0                             | 0                                       | 1                          | 1                                          | 0                            | 0                             |
| AT1G76550    | 0                             | 0                                       | 0                          | 1                                          | 0                            | 0                             |
| AT1G76690    | 1                             | 0                                       | 0                          | 0                                          | 0                            | 0                             |
| AT1G76860    | 0                             | 0                                       | 0                          | 0                                          | 1                            | 0                             |
| AT1G77260    | 1                             | 0                                       | 0                          | 0                                          | 1                            | 0                             |
| AT1G77330    | 1                             | 0                                       | 0                          | 0                                          | 0                            | 1                             |
| AT1G77510    | 1                             | 1                                       | 1                          | 1                                          | 1                            | 1                             |
| AT1G77590    | 1                             | 0                                       | 1                          | 1                                          | 1                            | 0                             |
| AT1G77710    | 1                             | 0                                       | 0                          | 0                                          | 0                            | 0                             |
| AT1G77940    | 1                             | 0                                       | 1                          | 0                                          | 1                            | 1                             |
| AT1G78240    | 0                             | 1                                       | 1                          | 0                                          | 1                            | 0                             |
| AT1G78300    | 1                             | 1                                       | 1                          | 1                                          | 1                            | 0                             |
| AT1G78380    | 1                             | 1                                       | 0                          | 1                                          | 1                            | 1                             |
| AT1G78570    | 0                             | 0                                       | 1                          | 0                                          | 1                            | 0                             |
| AT1G78660    | 1                             | 0                                       | 0                          | 0                                          | 0                            | 0                             |
| AT1G78850    | 1                             | 0                                       | 0                          | 0                                          | 1                            | 0                             |
| AT1G78860    | 0                             | 0                                       | 0                          | 1                                          | 0                            | 0                             |
| AT1G78900    | 1                             | 1                                       | 1                          | 1                                          | 1                            | 1                             |
| AT1G78920    | 1                             | 1                                       | 1                          | 0                                          | 1                            | 1                             |
| AT1G79010    | 1                             | 1                                       | 1                          | 0                                          | 1                            | 1                             |
| AT1G79210    | 0                             | 0                                       | 0                          | 1                                          | 0                            | 0                             |
| AT1G79230    | 1                             | 1                                       | 1                          | 0                                          | 1                            | 1                             |
| AT1G79440    | 1                             | 1                                       | 1                          | 0                                          | 1                            | 1                             |
| AT1G79500    | 0                             | 0                                       | 0                          | 0                                          | 1                            | 0                             |
| AT1G79530    | 1                             | 1                                       | 1                          | 1                                          | 1                            | 1                             |
| AT1G79550    | 1                             | 1                                       | 1                          | 1                                          | 1                            | 1                             |
| AT1G79690    | 1                             | 1                                       | 1                          | 0                                          | 1                            | 0                             |
| AT1G79750    | 1                             | 1                                       | 1                          | 1                                          | 1                            | 1                             |
| AT1G79930    | 0                             | 0                                       | 0                          | 1                                          | 0                            | 1                             |
| AT1G79940    | 1                             | 1                                       | 1                          | 0                                          | 1                            | 1                             |
| AT1G79990    | 0                             | 0                                       | 0                          | 1                                          | 1                            | 0                             |
| AT1G80070    | 1                             | 0                                       | 0                          | 0                                          | 1                            | 0                             |
| AT1G80230    | 1                             | 0                                       | 1                          | 0                                          | 1                            | 1                             |
| AT1G80270    | 1                             | 1                                       | 1                          | 0                                          | 1                            | 0                             |

**Supplementary Tables pertaining to Figure 1**

**Supplementary Table S2. The 1,995 proteins of the root cellular proteome**

| <b>Locus</b> | <b>Root Hairs<br/>(COBL9)</b> | <b>Non-Hair<br/>Epidermis<br/>(WER)</b> | <b>Cortex<br/>(CORTEX)</b> | <b>Endodermis<br/>/Quiescent<br/>(SCR)</b> | <b>Vasculature<br/>(WOL)</b> | <b>Columella<br/>(PET111)</b> |
|--------------|-------------------------------|-----------------------------------------|----------------------------|--------------------------------------------|------------------------------|-------------------------------|
| AT1G80480    | 0                             | 1                                       | 0                          | 0                                          | 0                            | 0                             |
| AT1G80500    | 0                             | 0                                       | 0                          | 0                                          | 1                            | 0                             |
| AT1G80560    | 1                             | 1                                       | 1                          | 0                                          | 1                            | 1                             |
| AT1G80600    | 1                             | 1                                       | 1                          | 1                                          | 1                            | 1                             |
| AT1G80670    | 1                             | 0                                       | 0                          | 0                                          | 0                            | 0                             |
| AT2G01140    | 1                             | 1                                       | 1                          | 1                                          | 1                            | 1                             |
| AT2G01250    | 1                             | 0                                       | 1                          | 1                                          | 1                            | 1                             |
| AT2G01410    | 1                             | 1                                       | 1                          | 0                                          | 1                            | 1                             |
| AT2G01470    | 1                             | 1                                       | 1                          | 0                                          | 1                            | 1                             |
| AT2G01690    | 0                             | 0                                       | 0                          | 0                                          | 1                            | 0                             |
| AT2G01720    | 1                             | 1                                       | 1                          | 0                                          | 1                            | 1                             |
| AT2G01970    | 1                             | 0                                       | 1                          | 1                                          | 1                            | 1                             |
| AT2G02040    | 1                             | 0                                       | 1                          | 0                                          | 0                            | 0                             |
| AT2G02050    | 1                             | 0                                       | 1                          | 0                                          | 1                            | 1                             |
| AT2G02740    | 1                             | 0                                       | 1                          | 0                                          | 0                            | 0                             |
| AT2G03120    | 0                             | 0                                       | 0                          | 0                                          | 0                            | 1                             |
| AT2G03510    | 1                             | 0                                       | 1                          | 0                                          | 1                            | 1                             |
| AT2G04030    | 1                             | 1                                       | 1                          | 1                                          | 1                            | 0                             |
| AT2G04280    | 1                             | 1                                       | 0                          | 0                                          | 1                            | 0                             |
| AT2G04350    | 0                             | 0                                       | 0                          | 0                                          | 0                            | 1                             |
| AT2G04400    | 1                             | 1                                       | 0                          | 1                                          | 0                            | 1                             |
| AT2G04780    | 0                             | 0                                       | 1                          | 0                                          | 0                            | 0                             |
| AT2G05710    | 1                             | 1                                       | 1                          | 1                                          | 1                            | 1                             |
| AT2G05840    | 1                             | 0                                       | 0                          | 0                                          | 1                            | 0                             |
| AT2G05990    | 1                             | 1                                       | 1                          | 1                                          | 1                            | 1                             |
| AT2G06050    | 1                             | 1                                       | 1                          | 0                                          | 1                            | 1                             |
| AT2G07050    | 1                             | 1                                       | 1                          | 1                                          | 1                            | 1                             |
| AT2G09990    | 1                             | 0                                       | 1                          | 0                                          | 1                            | 0                             |
| AT2G13560    | 1                             | 0                                       | 0                          | 0                                          | 1                            | 0                             |
| AT2G14170    | 1                             | 1                                       | 1                          | 1                                          | 1                            | 1                             |
| AT2G14720    | 1                             | 0                                       | 1                          | 0                                          | 0                            | 1                             |
| AT2G15270    | 0                             | 0                                       | 0                          | 0                                          | 1                            | 0                             |
| AT2G15390    | 1                             | 0                                       | 0                          | 0                                          | 0                            | 0                             |
| AT2G15620    | 1                             | 0                                       | 1                          | 0                                          | 1                            | 1                             |
| AT2G16005    | 1                             | 0                                       | 0                          | 0                                          | 0                            | 1                             |
| AT2G16460    | 1                             | 0                                       | 1                          | 1                                          | 1                            | 0                             |
| AT2G16570    | 1                             | 0                                       | 0                          | 0                                          | 0                            | 0                             |
| AT2G16600    | 1                             | 0                                       | 0                          | 1                                          | 1                            | 1                             |
| AT2G16640    | 0                             | 0                                       | 0                          | 0                                          | 1                            | 0                             |
| AT2G16760    | 0                             | 0                                       | 0                          | 0                                          | 1                            | 0                             |
| AT2G17130    | 1                             | 1                                       | 1                          | 0                                          | 1                            | 1                             |
| AT2G17265    | 1                             | 1                                       | 0                          | 0                                          | 0                            | 0                             |
| AT2G17420    | 1                             | 1                                       | 1                          | 1                                          | 1                            | 1                             |
| AT2G17500    | 1                             | 0                                       | 0                          | 0                                          | 0                            | 0                             |
| AT2G17630    | 1                             | 1                                       | 1                          | 0                                          | 1                            | 1                             |
| AT2G17720    | 1                             | 1                                       | 1                          | 0                                          | 1                            | 0                             |
| AT2G17790    | 0                             | 0                                       | 0                          | 0                                          | 1                            | 0                             |
| AT2G18020    | 1                             | 1                                       | 1                          | 1                                          | 1                            | 1                             |
| AT2G18030    | 1                             | 0                                       | 0                          | 0                                          | 0                            | 0                             |

**Supplementary Tables pertaining to Figure 1**

**Supplementary Table S2. The 1,995 proteins of the root cellular proteome**

| <b>Locus</b> | <b>Root Hairs<br/>(COBL9)</b> | <b>Non-Hair<br/>Epidermis<br/>(WER)</b> | <b>Cortex<br/>(CORTEX)</b> | <b>Endodermis<br/>/Quiescent<br/>(SCR)</b> | <b>Vasculature<br/>(WOL)</b> | <b>Columella<br/>(PET111)</b> |
|--------------|-------------------------------|-----------------------------------------|----------------------------|--------------------------------------------|------------------------------|-------------------------------|
| AT2G18230    | 0                             | 0                                       | 0                          | 0                                          | 0                            | 1                             |
| AT2G18330    | 1                             | 0                                       | 1                          | 0                                          | 1                            | 0                             |
| AT2G18520    | 1                             | 0                                       | 0                          | 0                                          | 1                            | 0                             |
| AT2G18960    | 1                             | 1                                       | 1                          | 1                                          | 1                            | 1                             |
| AT2G18980    | 1                             | 0                                       | 0                          | 0                                          | 0                            | 0                             |
| AT2G19080    | 1                             | 0                                       | 0                          | 1                                          | 1                            | 1                             |
| AT2G19160    | 1                             | 0                                       | 0                          | 0                                          | 0                            | 0                             |
| AT2G19520    | 0                             | 0                                       | 0                          | 0                                          | 1                            | 0                             |
| AT2G19730    | 1                             | 0                                       | 0                          | 0                                          | 1                            | 0                             |
| AT2G19760    | 0                             | 0                                       | 0                          | 0                                          | 0                            | 1                             |
| AT2G19860    | 1                             | 0                                       | 0                          | 0                                          | 0                            | 0                             |
| AT2G19880    | 1                             | 0                                       | 1                          | 0                                          | 1                            | 0                             |
| AT2G19940    | 1                             | 1                                       | 1                          | 0                                          | 1                            | 1                             |
| AT2G20060    | 1                             | 1                                       | 0                          | 0                                          | 1                            | 1                             |
| AT2G20360    | 1                             | 1                                       | 1                          | 1                                          | 1                            | 1                             |
| AT2G20370    | 1                             | 0                                       | 0                          | 0                                          | 1                            | 0                             |
| AT2G20420    | 1                             | 1                                       | 1                          | 1                                          | 1                            | 1                             |
| AT2G20530    | 1                             | 1                                       | 1                          | 1                                          | 1                            | 1                             |
| AT2G20580    | 1                             | 0                                       | 1                          | 1                                          | 1                            | 0                             |
| AT2G20680    | 0                             | 0                                       | 1                          | 0                                          | 0                            | 0                             |
| AT2G20810    | 0                             | 0                                       | 1                          | 0                                          | 1                            | 0                             |
| AT2G20890    | 0                             | 0                                       | 0                          | 0                                          | 1                            | 0                             |
| AT2G20940    | 1                             | 1                                       | 1                          | 0                                          | 1                            | 0                             |
| AT2G20990    | 1                             | 1                                       | 1                          | 0                                          | 1                            | 1                             |
| AT2G21160    | 1                             | 1                                       | 1                          | 1                                          | 1                            | 0                             |
| AT2G21170    | 1                             | 1                                       | 1                          | 1                                          | 1                            | 1                             |
| AT2G21250    | 1                             | 0                                       | 0                          | 0                                          | 0                            | 0                             |
| AT2G21390    | 1                             | 0                                       | 0                          | 1                                          | 1                            | 1                             |
| AT2G21410    | 1                             | 1                                       | 0                          | 0                                          | 0                            | 1                             |
| AT2G21590    | 0                             | 0                                       | 0                          | 0                                          | 0                            | 1                             |
| AT2G21600    | 0                             | 0                                       | 1                          | 0                                          | 1                            | 1                             |
| AT2G21620    | 0                             | 0                                       | 0                          | 0                                          | 1                            | 0                             |
| AT2G21660    | 1                             | 1                                       | 1                          | 1                                          | 1                            | 1                             |
| AT2G21870    | 1                             | 1                                       | 1                          | 1                                          | 1                            | 1                             |
| AT2G22125    | 1                             | 0                                       | 0                          | 0                                          | 0                            | 0                             |
| AT2G22170    | 1                             | 0                                       | 1                          | 0                                          | 1                            | 1                             |
| AT2G22230    | 0                             | 0                                       | 1                          | 1                                          | 0                            | 1                             |
| AT2G22250    | 1                             | 0                                       | 0                          | 0                                          | 1                            | 0                             |
| AT2G22420    | 0                             | 0                                       | 0                          | 0                                          | 0                            | 1                             |
| AT2G22480    | 1                             | 1                                       | 1                          | 1                                          | 1                            | 0                             |
| AT2G22500    | 1                             | 0                                       | 0                          | 0                                          | 0                            | 0                             |
| AT2G22780    | 1                             | 1                                       | 1                          | 1                                          | 1                            | 1                             |
| AT2G22795    | 1                             | 1                                       | 1                          | 0                                          | 1                            | 1                             |
| AT2G22970    | 1                             | 0                                       | 0                          | 0                                          | 0                            | 0                             |
| AT2G23070    | 0                             | 0                                       | 0                          | 0                                          | 1                            | 0                             |
| AT2G23350    | 1                             | 0                                       | 0                          | 1                                          | 1                            | 0                             |
| AT2G23370    | 0                             | 1                                       | 0                          | 0                                          | 0                            | 0                             |
| AT2G24170    | 1                             | 0                                       | 0                          | 0                                          | 0                            | 0                             |
| AT2G24180    | 1                             | 1                                       | 1                          | 0                                          | 0                            | 1                             |

**Supplementary Tables pertaining to Figure 1**

**Supplementary Table S2. The 1,995 proteins of the root cellular proteome**

| <b>Locus</b> | <b>Root Hairs<br/>(COBL9)</b> | <b>Non-Hair<br/>Epidermis<br/>(WER)</b> | <b>Cortex<br/>(CORTEX)</b> | <b>Endodermis<br/>/Quiescent<br/>(SCR)</b> | <b>Vasculature<br/>(WOL)</b> | <b>Columella<br/>(PET111)</b> |
|--------------|-------------------------------|-----------------------------------------|----------------------------|--------------------------------------------|------------------------------|-------------------------------|
| AT2G24200    | 1                             | 1                                       | 1                          | 1                                          | 1                            | 1                             |
| AT2G24420    | 1                             | 0                                       | 0                          | 0                                          | 1                            | 0                             |
| AT2G25110    | 1                             | 0                                       | 0                          | 0                                          | 1                            | 1                             |
| AT2G25160    | 0                             | 0                                       | 1                          | 0                                          | 0                            | 0                             |
| AT2G25830    | 1                             | 0                                       | 0                          | 0                                          | 0                            | 0                             |
| AT2G25980    | 1                             | 1                                       | 0                          | 0                                          | 1                            | 1                             |
| AT2G26080    | 1                             | 1                                       | 1                          | 1                                          | 1                            | 1                             |
| AT2G26140    | 1                             | 1                                       | 1                          | 0                                          | 1                            | 0                             |
| AT2G26230    | 1                             | 1                                       | 1                          | 1                                          | 1                            | 1                             |
| AT2G26240    | 0                             | 1                                       | 0                          | 0                                          | 0                            | 0                             |
| AT2G26640    | 1                             | 0                                       | 1                          | 0                                          | 0                            | 0                             |
| AT2G26730    | 0                             | 0                                       | 0                          | 0                                          | 1                            | 0                             |
| AT2G27000    | 0                             | 0                                       | 0                          | 0                                          | 1                            | 0                             |
| AT2G27020    | 1                             | 0                                       | 1                          | 1                                          | 1                            | 1                             |
| AT2G27040    | 0                             | 0                                       | 0                          | 0                                          | 1                            | 0                             |
| AT2G27190    | 1                             | 0                                       | 0                          | 0                                          | 0                            | 0                             |
| AT2G27530    | 1                             | 1                                       | 1                          | 1                                          | 1                            | 1                             |
| AT2G27720    | 0                             | 1                                       | 0                          | 0                                          | 1                            | 0                             |
| AT2G27730    | 1                             | 1                                       | 1                          | 0                                          | 1                            | 1                             |
| AT2G27860    | 1                             | 0                                       | 0                          | 0                                          | 0                            | 1                             |
| AT2G28000    | 1                             | 1                                       | 1                          | 1                                          | 1                            | 1                             |
| AT2G28190    | 1                             | 0                                       | 1                          | 1                                          | 1                            | 1                             |
| AT2G28430    | 1                             | 0                                       | 0                          | 0                                          | 0                            | 1                             |
| AT2G28490    | 0                             | 0                                       | 0                          | 0                                          | 1                            | 0                             |
| AT2G28520    | 1                             | 0                                       | 1                          | 0                                          | 0                            | 1                             |
| AT2G28760    | 0                             | 0                                       | 0                          | 0                                          | 0                            | 1                             |
| AT2G28790    | 0                             | 0                                       | 0                          | 1                                          | 1                            | 0                             |
| AT2G28900    | 0                             | 0                                       | 0                          | 0                                          | 0                            | 1                             |
| AT2G29080    | 1                             | 1                                       | 1                          | 0                                          | 1                            | 1                             |
| AT2G29550    | 0                             | 0                                       | 0                          | 1                                          | 0                            | 0                             |
| AT2G29960    | 1                             | 0                                       | 1                          | 0                                          | 1                            | 1                             |
| AT2G30050    | 1                             | 0                                       | 0                          | 1                                          | 1                            | 0                             |
| AT2G30110    | 1                             | 0                                       | 0                          | 0                                          | 1                            | 0                             |
| AT2G30200    | 1                             | 1                                       | 1                          | 1                                          | 1                            | 1                             |
| AT2G30490    | 1                             | 1                                       | 1                          | 1                                          | 1                            | 1                             |
| AT2G30860    | 1                             | 0                                       | 0                          | 1                                          | 1                            | 1                             |
| AT2G30870    | 1                             | 1                                       | 1                          | 1                                          | 1                            | 0                             |
| AT2G30920    | 1                             | 0                                       | 0                          | 0                                          | 0                            | 0                             |
| AT2G30930    | 1                             | 0                                       | 0                          | 0                                          | 1                            | 0                             |
| AT2G30950    | 0                             | 0                                       | 0                          | 0                                          | 0                            | 1                             |
| AT2G30970    | 1                             | 1                                       | 1                          | 1                                          | 1                            | 1                             |
| AT2G31060    | 1                             | 1                                       | 0                          | 0                                          | 0                            | 0                             |
| AT2G31140    | 1                             | 0                                       | 0                          | 0                                          | 1                            | 1                             |
| AT2G31320    | 0                             | 0                                       | 0                          | 0                                          | 1                            | 0                             |
| AT2G31360    | 0                             | 0                                       | 0                          | 0                                          | 1                            | 0                             |
| AT2G31390    | 1                             | 1                                       | 1                          | 1                                          | 1                            | 1                             |
| AT2G31610    | 1                             | 0                                       | 1                          | 0                                          | 1                            | 0                             |
| AT2G31670    | 1                             | 0                                       | 1                          | 1                                          | 1                            | 0                             |
| AT2G31810    | 1                             | 0                                       | 0                          | 0                                          | 1                            | 0                             |

**Supplementary Tables pertaining to Figure 1**

**Supplementary Table S2. The 1,995 proteins of the root cellular proteome**

| <b>Locus</b> | <b>Root Hairs<br/>(COBL9)</b> | <b>Non-Hair<br/>Epidermis<br/>(WER)</b> | <b>Cortex<br/>(CORTEX)</b> | <b>Endodermis<br/>/Quiescent<br/>(SCR)</b> | <b>Vasculature<br/>(WOL)</b> | <b>Columella<br/>(PET111)</b> |
|--------------|-------------------------------|-----------------------------------------|----------------------------|--------------------------------------------|------------------------------|-------------------------------|
| AT2G32060    | 0                             | 0                                       | 0                          | 0                                          | 1                            | 0                             |
| AT2G32240    | 1                             | 0                                       | 0                          | 0                                          | 1                            | 0                             |
| AT2G32520    | 0                             | 0                                       | 0                          | 0                                          | 0                            | 1                             |
| AT2G32730    | 0                             | 0                                       | 0                          | 0                                          | 1                            | 0                             |
| AT2G32920    | 1                             | 1                                       | 1                          | 1                                          | 1                            | 1                             |
| AT2G33040    | 1                             | 1                                       | 1                          | 1                                          | 1                            | 1                             |
| AT2G33150    | 1                             | 1                                       | 1                          | 1                                          | 1                            | 1                             |
| AT2G33210    | 1                             | 1                                       | 1                          | 1                                          | 1                            | 1                             |
| AT2G33220    | 1                             | 0                                       | 1                          | 1                                          | 1                            | 1                             |
| AT2G33340    | 0                             | 0                                       | 0                          | 0                                          | 1                            | 0                             |
| AT2G34040    | 0                             | 0                                       | 0                          | 1                                          | 0                            | 0                             |
| AT2G34300    | 1                             | 1                                       | 1                          | 1                                          | 1                            | 1                             |
| AT2G34480    | 1                             | 0                                       | 1                          | 1                                          | 1                            | 1                             |
| AT2G34560    | 1                             | 0                                       | 0                          | 0                                          | 0                            | 0                             |
| AT2G34585    | 1                             | 0                                       | 0                          | 0                                          | 0                            | 0                             |
| AT2G34590    | 1                             | 0                                       | 1                          | 1                                          | 1                            | 0                             |
| AT2G34630    | 1                             | 1                                       | 0                          | 0                                          | 1                            | 0                             |
| AT2G34660    | 1                             | 0                                       | 1                          | 1                                          | 1                            | 1                             |
| AT2G35010    | 1                             | 0                                       | 0                          | 0                                          | 1                            | 1                             |
| AT2G35040    | 1                             | 1                                       | 1                          | 0                                          | 1                            | 0                             |
| AT2G35100    | 1                             | 0                                       | 1                          | 0                                          | 1                            | 0                             |
| AT2G35120    | 1                             | 0                                       | 1                          | 0                                          | 0                            | 0                             |
| AT2G35490    | 0                             | 0                                       | 0                          | 0                                          | 0                            | 1                             |
| AT2G35605    | 1                             | 0                                       | 0                          | 0                                          | 1                            | 0                             |
| AT2G35610    | 1                             | 1                                       | 0                          | 0                                          | 1                            | 0                             |
| AT2G35630    | 0                             | 0                                       | 0                          | 0                                          | 1                            | 0                             |
| AT2G35720    | 1                             | 0                                       | 1                          | 0                                          | 1                            | 0                             |
| AT2G35790    | 1                             | 0                                       | 0                          | 0                                          | 0                            | 0                             |
| AT2G35810    | 1                             | 0                                       | 0                          | 0                                          | 0                            | 0                             |
| AT2G36070    | 1                             | 0                                       | 0                          | 0                                          | 1                            | 0                             |
| AT2G36130    | 1                             | 0                                       | 0                          | 0                                          | 1                            | 0                             |
| AT2G36160    | 1                             | 0                                       | 1                          | 0                                          | 0                            | 1                             |
| AT2G36290    | 0                             | 0                                       | 1                          | 1                                          | 0                            | 0                             |
| AT2G36380    | 1                             | 0                                       | 0                          | 0                                          | 1                            | 0                             |
| AT2G36460    | 0                             | 0                                       | 0                          | 0                                          | 0                            | 1                             |
| AT2G36530    | 1                             | 1                                       | 1                          | 1                                          | 1                            | 1                             |
| AT2G36580    | 0                             | 0                                       | 0                          | 0                                          | 1                            | 0                             |
| AT2G36850    | 1                             | 0                                       | 1                          | 1                                          | 1                            | 1                             |
| AT2G36880    | 0                             | 1                                       | 1                          | 0                                          | 1                            | 0                             |
| AT2G36910    | 0                             | 0                                       | 0                          | 0                                          | 1                            | 0                             |
| AT2G37020    | 0                             | 0                                       | 0                          | 0                                          | 1                            | 0                             |
| AT2G37040    | 0                             | 0                                       | 0                          | 0                                          | 1                            | 0                             |
| AT2G37050    | 0                             | 0                                       | 0                          | 0                                          | 1                            | 0                             |
| AT2G37170    | 1                             | 0                                       | 1                          | 1                                          | 1                            | 0                             |
| AT2G37230    | 1                             | 1                                       | 1                          | 0                                          | 1                            | 0                             |
| AT2G37250    | 1                             | 1                                       | 0                          | 0                                          | 1                            | 0                             |
| AT2G37500    | 1                             | 0                                       | 0                          | 0                                          | 1                            | 0                             |
| AT2G37550    | 1                             | 0                                       | 0                          | 0                                          | 0                            | 0                             |
| AT2G37670    | 1                             | 0                                       | 0                          | 0                                          | 0                            | 0                             |

**Supplementary Tables pertaining to Figure 1**  
**Supplementary Table S2. The 1,995 proteins of the root cellular proteome**

| <b>Locus</b> | <b>Root Hairs<br/>(COBL9)</b> | <b>Non-Hair<br/>Epidermis<br/>(WER)</b> | <b>Cortex<br/>(CORTEX)</b> | <b>Endodermis<br/>/Quiescent<br/>(SCR)</b> | <b>Vasculature<br/>(WOL)</b> | <b>Columella<br/>(PET111)</b> |
|--------------|-------------------------------|-----------------------------------------|----------------------------|--------------------------------------------|------------------------------|-------------------------------|
| AT2G37690    | 1                             | 1                                       | 1                          | 1                                          | 1                            | 0                             |
| AT2G37860    | 1                             | 0                                       | 1                          | 0                                          | 1                            | 1                             |
| AT2G38040    | 1                             | 1                                       | 1                          | 1                                          | 1                            | 1                             |
| AT2G38230    | 0                             | 0                                       | 0                          | 0                                          | 0                            | 1                             |
| AT2G38280    | 1                             | 0                                       | 0                          | 1                                          | 0                            | 0                             |
| AT2G38360    | 1                             | 0                                       | 0                          | 0                                          | 1                            | 0                             |
| AT2G38550    | 1                             | 0                                       | 0                          | 1                                          | 1                            | 1                             |
| AT2G38650    | 1                             | 0                                       | 0                          | 0                                          | 0                            | 0                             |
| AT2G38670    | 1                             | 1                                       | 0                          | 0                                          | 0                            | 1                             |
| AT2G38750    | 1                             | 1                                       | 1                          | 0                                          | 1                            | 1                             |
| AT2G38760    | 1                             | 1                                       | 1                          | 0                                          | 1                            | 1                             |
| AT2G38840    | 0                             | 1                                       | 1                          | 0                                          | 0                            | 0                             |
| AT2G38960    | 1                             | 0                                       | 1                          | 0                                          | 1                            | 0                             |
| AT2G39040    | 0                             | 0                                       | 0                          | 0                                          | 1                            | 0                             |
| AT2G39630    | 1                             | 0                                       | 0                          | 0                                          | 0                            | 1                             |
| AT2G39750    | 0                             | 0                                       | 0                          | 0                                          | 0                            | 1                             |
| AT2G39800    | 0                             | 0                                       | 1                          | 0                                          | 0                            | 0                             |
| AT2G39960    | 1                             | 1                                       | 1                          | 1                                          | 1                            | 1                             |
| AT2G39990    | 1                             | 0                                       | 0                          | 0                                          | 1                            | 0                             |
| AT2G40290    | 0                             | 0                                       | 0                          | 0                                          | 1                            | 0                             |
| AT2G40380    | 0                             | 0                                       | 0                          | 0                                          | 1                            | 1                             |
| AT2G40510    | 1                             | 0                                       | 0                          | 0                                          | 1                            | 0                             |
| AT2G40600    | 0                             | 0                                       | 0                          | 1                                          | 0                            | 0                             |
| AT2G40660    | 0                             | 0                                       | 0                          | 0                                          | 1                            | 0                             |
| AT2G40800    | 1                             | 0                                       | 0                          | 0                                          | 0                            | 0                             |
| AT2G40840    | 1                             | 0                                       | 0                          | 0                                          | 0                            | 1                             |
| AT2G40890    | 0                             | 0                                       | 1                          | 0                                          | 0                            | 0                             |
| AT2G41150    | 0                             | 0                                       | 1                          | 0                                          | 0                            | 0                             |
| AT2G41220    | 1                             | 1                                       | 1                          | 1                                          | 1                            | 1                             |
| AT2G41475    | 1                             | 0                                       | 0                          | 0                                          | 1                            | 0                             |
| AT2G41530    | 1                             | 0                                       | 1                          | 1                                          | 1                            | 0                             |
| AT2G41600    | 1                             | 0                                       | 0                          | 0                                          | 0                            | 0                             |
| AT2G41620    | 1                             | 0                                       | 0                          | 0                                          | 1                            | 0                             |
| AT2G41740    | 1                             | 0                                       | 0                          | 0                                          | 1                            | 0                             |
| AT2G41770    | 1                             | 0                                       | 1                          | 0                                          | 1                            | 0                             |
| AT2G41790    | 0                             | 0                                       | 0                          | 0                                          | 1                            | 0                             |
| AT2G41840    | 1                             | 0                                       | 0                          | 1                                          | 1                            | 0                             |
| AT2G42210    | 1                             | 1                                       | 1                          | 0                                          | 1                            | 1                             |
| AT2G42490    | 1                             | 1                                       | 1                          | 0                                          | 1                            | 1                             |
| AT2G42590    | 1                             | 0                                       | 0                          | 0                                          | 1                            | 0                             |
| AT2G42710    | 1                             | 1                                       | 0                          | 0                                          | 1                            | 0                             |
| AT2G42770    | 0                             | 0                                       | 0                          | 0                                          | 1                            | 0                             |
| AT2G42790    | 1                             | 0                                       | 0                          | 0                                          | 0                            | 1                             |
| AT2G42810    | 0                             | 0                                       | 0                          | 0                                          | 1                            | 0                             |
| AT2G42910    | 1                             | 0                                       | 0                          | 1                                          | 1                            | 0                             |
| AT2G43070    | 1                             | 0                                       | 0                          | 0                                          | 0                            | 0                             |
| AT2G43090    | 1                             | 0                                       | 0                          | 1                                          | 1                            | 1                             |
| AT2G43350    | 0                             | 1                                       | 0                          | 0                                          | 0                            | 0                             |
| AT2G43360    | 1                             | 0                                       | 0                          | 0                                          | 1                            | 0                             |



**Supplementary Tables pertaining to Figure 1**  
**Supplementary Table S2. The 1,995 proteins of the root cellular proteome**

| <b>Locus</b> | <b>Root Hairs<br/>(COBL9)</b> | <b>Non-Hair<br/>Epidermis<br/>(WER)</b> | <b>Cortex<br/>(CORTEX)</b> | <b>Endodermis<br/>/Quiescent<br/>(SCR)</b> | <b>Vasculature<br/>(WOL)</b> | <b>Columella<br/>(PET111)</b> |
|--------------|-------------------------------|-----------------------------------------|----------------------------|--------------------------------------------|------------------------------|-------------------------------|
| AT2G43400    | 0                             | 0                                       | 0                          | 0                                          | 1                            | 0                             |
| AT2G43610    | 0                             | 1                                       | 0                          | 0                                          | 0                            | 1                             |
| AT2G43630    | 0                             | 0                                       | 0                          | 0                                          | 1                            | 0                             |
| AT2G43710    | 1                             | 1                                       | 1                          | 1                                          | 1                            | 0                             |
| AT2G43750    | 1                             | 1                                       | 1                          | 1                                          | 1                            | 1                             |
| AT2G43770    | 0                             | 0                                       | 0                          | 0                                          | 1                            | 0                             |
| AT2G43950    | 1                             | 0                                       | 1                          | 0                                          | 1                            | 1                             |
| AT2G44040    | 1                             | 0                                       | 0                          | 0                                          | 0                            | 0                             |
| AT2G44050    | 1                             | 1                                       | 1                          | 0                                          | 1                            | 1                             |
| AT2G44060    | 1                             | 0                                       | 1                          | 0                                          | 1                            | 1                             |
| AT2G44100    | 0                             | 0                                       | 0                          | 0                                          | 1                            | 0                             |
| AT2G44120    | 1                             | 0                                       | 0                          | 1                                          | 1                            | 0                             |
| AT2G44350    | 1                             | 1                                       | 1                          | 1                                          | 1                            | 1                             |
| AT2G44530    | 1                             | 0                                       | 1                          | 0                                          | 0                            | 0                             |
| AT2G44610    | 1                             | 0                                       | 1                          | 0                                          | 1                            | 0                             |
| AT2G44640    | 0                             | 0                                       | 1                          | 1                                          | 1                            | 0                             |
| AT2G44790    | 1                             | 0                                       | 1                          | 1                                          | 1                            | 1                             |
| AT2G45030    | 0                             | 1                                       | 0                          | 0                                          | 1                            | 0                             |
| AT2G45060    | 1                             | 0                                       | 1                          | 1                                          | 1                            | 1                             |
| AT2G45070    | 1                             | 0                                       | 0                          | 0                                          | 0                            | 0                             |
| AT2G45140    | 1                             | 0                                       | 0                          | 0                                          | 1                            | 0                             |
| AT2G45290    | 0                             | 1                                       | 0                          | 1                                          | 1                            | 0                             |
| AT2G45300    | 1                             | 1                                       | 0                          | 1                                          | 1                            | 0                             |
| AT2G45440    | 0                             | 1                                       | 0                          | 0                                          | 0                            | 0                             |
| AT2G45740    | 0                             | 0                                       | 0                          | 0                                          | 0                            | 1                             |
| AT2G45750    | 1                             | 0                                       | 0                          | 0                                          | 1                            | 0                             |
| AT2G45790    | 1                             | 0                                       | 0                          | 0                                          | 1                            | 1                             |
| AT2G45820    | 0                             | 0                                       | 0                          | 0                                          | 1                            | 0                             |
| AT2G45960    | 1                             | 1                                       | 1                          | 1                                          | 1                            | 1                             |
| AT2G45990    | 1                             | 0                                       | 0                          | 0                                          | 0                            | 0                             |
| AT2G46170    | 0                             | 0                                       | 0                          | 1                                          | 0                            | 1                             |
| AT2G46280    | 1                             | 0                                       | 0                          | 1                                          | 1                            | 0                             |
| AT2G46470    | 1                             | 0                                       | 1                          | 0                                          | 1                            | 0                             |
| AT2G46520    | 1                             | 0                                       | 0                          | 1                                          | 0                            | 0                             |
| AT2G47000    | 1                             | 1                                       | 0                          | 0                                          | 1                            | 1                             |
| AT2G47380    | 0                             | 0                                       | 0                          | 0                                          | 0                            | 1                             |
| AT2G47390    | 1                             | 1                                       | 0                          | 1                                          | 1                            | 1                             |
| AT2G47470    | 1                             | 1                                       | 1                          | 1                                          | 1                            | 1                             |
| AT2G47510    | 1                             | 1                                       | 1                          | 1                                          | 1                            | 1                             |
| AT2G47540    | 1                             | 0                                       | 0                          | 0                                          | 0                            | 0                             |
| AT2G47610    | 1                             | 0                                       | 0                          | 1                                          | 1                            | 0                             |
| AT2G47650    | 1                             | 0                                       | 1                          | 1                                          | 1                            | 1                             |
| AT2G47730    | 1                             | 1                                       | 0                          | 1                                          | 1                            | 1                             |
| AT2G47800    | 1                             | 1                                       | 0                          | 0                                          | 0                            | 1                             |
| AT2G47840    | 1                             | 0                                       | 1                          | 0                                          | 1                            | 1                             |
| AT2G48020    | 0                             | 0                                       | 1                          | 0                                          | 0                            | 0                             |
| AT3G01120    | 1                             | 1                                       | 1                          | 1                                          | 1                            | 1                             |
| AT3G01190    | 1                             | 0                                       | 0                          | 0                                          | 0                            | 0                             |
| AT3G01280    | 1                             | 1                                       | 1                          | 1                                          | 1                            | 1                             |

**Supplementary Tables pertaining to Figure 1**  
**Supplementary Table S2. The 1,995 proteins of the root cellular proteome**

| <b>Locus</b> | <b>Root Hairs<br/>(COBL9)</b> | <b>Non-Hair<br/>Epidermis<br/>(WER)</b> | <b>Cortex<br/>(CORTEX)</b> | <b>Endodermis<br/>/Quiescent<br/>(SCR)</b> | <b>Vasculature<br/>(WOL)</b> | <b>Columella<br/>(PET111)</b> |
|--------------|-------------------------------|-----------------------------------------|----------------------------|--------------------------------------------|------------------------------|-------------------------------|
| AT3G01290    | 1                             | 0                                       | 0                          | 0                                          | 0                            | 0                             |
| AT3G01380    | 1                             | 0                                       | 0                          | 0                                          | 1                            | 0                             |
| AT3G01390    | 1                             | 0                                       | 1                          | 0                                          | 1                            | 1                             |
| AT3G01720    | 1                             | 0                                       | 0                          | 0                                          | 1                            | 0                             |
| AT3G01800    | 1                             | 1                                       | 0                          | 0                                          | 1                            | 0                             |
| AT3G01910    | 1                             | 1                                       | 1                          | 0                                          | 1                            | 0                             |
| AT3G02080    | 0                             | 0                                       | 0                          | 1                                          | 0                            | 0                             |
| AT3G02090    | 1                             | 1                                       | 1                          | 1                                          | 1                            | 1                             |
| AT3G02200    | 0                             | 0                                       | 0                          | 1                                          | 1                            | 0                             |
| AT3G02230    | 1                             | 1                                       | 1                          | 1                                          | 1                            | 1                             |
| AT3G02260    | 0                             | 0                                       | 0                          | 0                                          | 1                            | 0                             |
| AT3G02350    | 1                             | 1                                       | 1                          | 0                                          | 1                            | 0                             |
| AT3G02360    | 1                             | 0                                       | 0                          | 1                                          | 1                            | 0                             |
| AT3G02420    | 1                             | 0                                       | 1                          | 0                                          | 0                            | 0                             |
| AT3G02520    | 1                             | 0                                       | 1                          | 1                                          | 1                            | 1                             |
| AT3G02530    | 1                             | 0                                       | 0                          | 1                                          | 1                            | 0                             |
| AT3G02560    | 1                             | 0                                       | 0                          | 0                                          | 1                            | 0                             |
| AT3G02630    | 1                             | 1                                       | 0                          | 1                                          | 1                            | 0                             |
| AT3G02650    | 1                             | 1                                       | 1                          | 0                                          | 1                            | 0                             |
| AT3G02660    | 1                             | 0                                       | 0                          | 0                                          | 0                            | 0                             |
| AT3G02780    | 1                             | 0                                       | 1                          | 0                                          | 1                            | 1                             |
| AT3G02880    | 1                             | 0                                       | 1                          | 0                                          | 1                            | 0                             |
| AT3G02900    | 1                             | 0                                       | 0                          | 0                                          | 0                            | 1                             |
| AT3G03050    | 1                             | 0                                       | 0                          | 0                                          | 0                            | 0                             |
| AT3G03060    | 0                             | 1                                       | 0                          | 1                                          | 0                            | 0                             |
| AT3G03100    | 1                             | 0                                       | 1                          | 1                                          | 1                            | 1                             |
| AT3G03220    | 0                             | 0                                       | 0                          | 0                                          | 1                            | 0                             |
| AT3G03250    | 1                             | 1                                       | 1                          | 1                                          | 1                            | 1                             |
| AT3G03330    | 0                             | 0                                       | 0                          | 0                                          | 1                            | 0                             |
| AT3G03600    | 1                             | 0                                       | 0                          | 1                                          | 1                            | 1                             |
| AT3G03640    | 1                             | 1                                       | 0                          | 0                                          | 0                            | 1                             |
| AT3G03810    | 0                             | 0                                       | 0                          | 0                                          | 0                            | 1                             |
| AT3G03960    | 1                             | 0                                       | 1                          | 1                                          | 1                            | 0                             |
| AT3G03990    | 0                             | 0                                       | 0                          | 0                                          | 1                            | 0                             |
| AT3G04080    | 1                             | 0                                       | 1                          | 0                                          | 1                            | 1                             |
| AT3G04120    | 0                             | 1                                       | 0                          | 1                                          | 0                            | 1                             |
| AT3G04520    | 0                             | 0                                       | 0                          | 1                                          | 0                            | 0                             |
| AT3G04570    | 1                             | 0                                       | 0                          | 0                                          | 0                            | 0                             |
| AT3G04600    | 0                             | 0                                       | 0                          | 0                                          | 1                            | 0                             |
| AT3G04790    | 1                             | 0                                       | 0                          | 1                                          | 0                            | 0                             |
| AT3G04820    | 0                             | 0                                       | 0                          | 0                                          | 1                            | 0                             |
| AT3G04830    | 1                             | 1                                       | 1                          | 1                                          | 1                            | 1                             |
| AT3G04840    | 1                             | 1                                       | 1                          | 1                                          | 1                            | 1                             |
| AT3G04920    | 1                             | 0                                       | 1                          | 1                                          | 1                            | 0                             |
| AT3G04940    | 0                             | 0                                       | 0                          | 0                                          | 1                            | 0                             |
| AT3G05060    | 1                             | 0                                       | 0                          | 1                                          | 1                            | 0                             |
| AT3G05100    | 0                             | 0                                       | 1                          | 0                                          | 0                            | 0                             |
| AT3G05230    | 1                             | 1                                       | 1                          | 1                                          | 1                            | 1                             |
| AT3G05420    | 1                             | 0                                       | 0                          | 0                                          | 0                            | 0                             |

**Supplementary Tables pertaining to Figure 1**  
**Supplementary Table S2. The 1,995 proteins of the root cellular proteome**

| Locus     | Root Hairs<br>(COBL9) | Non-Hair<br>Epidermis<br>(WER) | Cortex<br>(CORTEX) | Endodermis<br>/Quiescent<br>(SCR) | Vasculature<br>(WOL) | Columella<br>(PET111) |
|-----------|-----------------------|--------------------------------|--------------------|-----------------------------------|----------------------|-----------------------|
| AT3G05560 | 1                     | 0                              | 1                  | 0                                 | 0                    | 1                     |
| AT3G05970 | 1                     | 1                              | 1                  | 0                                 | 1                    | 1                     |
| AT3G06040 | 1                     | 0                              | 0                  | 0                                 | 0                    | 0                     |
| AT3G06050 | 1                     | 0                              | 1                  | 0                                 | 1                    | 1                     |
| AT3G06300 | 1                     | 1                              | 1                  | 0                                 | 1                    | 1                     |
| AT3G06350 | 1                     | 1                              | 0                  | 0                                 | 1                    | 0                     |
| AT3G06530 | 1                     | 0                              | 0                  | 0                                 | 1                    | 0                     |
| AT3G06650 | 1                     | 0                              | 1                  | 0                                 | 1                    | 0                     |
| AT3G06810 | 1                     | 1                              | 0                  | 0                                 | 0                    | 1                     |
| AT3G06860 | 1                     | 1                              | 1                  | 0                                 | 1                    | 1                     |
| AT3G07060 | 1                     | 1                              | 1                  | 0                                 | 1                    | 0                     |
| AT3G07100 | 0                     | 0                              | 0                  | 0                                 | 1                    | 0                     |
| AT3G07110 | 1                     | 0                              | 0                  | 1                                 | 1                    | 0                     |
| AT3G07140 | 0                     | 0                              | 1                  | 0                                 | 1                    | 0                     |
| AT3G07160 | 0                     | 0                              | 0                  | 0                                 | 1                    | 0                     |
| AT3G07180 | 0                     | 0                              | 0                  | 0                                 | 1                    | 1                     |
| AT3G07290 | 0                     | 0                              | 1                  | 0                                 | 0                    | 0                     |
| AT3G07330 | 0                     | 1                              | 0                  | 0                                 | 0                    | 0                     |
| AT3G07390 | 0                     | 0                              | 0                  | 0                                 | 1                    | 0                     |
| AT3G07430 | 1                     | 0                              | 1                  | 0                                 | 1                    | 0                     |
| AT3G07470 | 1                     | 0                              | 0                  | 0                                 | 0                    | 0                     |
| AT3G07480 | 1                     | 0                              | 1                  | 1                                 | 1                    | 1                     |
| AT3G07610 | 0                     | 0                              | 0                  | 0                                 | 1                    | 0                     |
| AT3G07630 | 1                     | 0                              | 0                  | 0                                 | 1                    | 0                     |
| AT3G07680 | 1                     | 1                              | 0                  | 1                                 | 1                    | 1                     |
| AT3G07770 | 1                     | 1                              | 1                  | 1                                 | 1                    | 1                     |
| AT3G07950 | 1                     | 0                              | 0                  | 0                                 | 0                    | 0                     |
| AT3G08530 | 1                     | 0                              | 1                  | 0                                 | 1                    | 1                     |
| AT3G08550 | 1                     | 0                              | 0                  | 0                                 | 0                    | 0                     |
| AT3G08580 | 1                     | 1                              | 1                  | 1                                 | 1                    | 1                     |
| AT3G08590 | 1                     | 0                              | 1                  | 1                                 | 1                    | 0                     |
| AT3G08610 | 0                     | 0                              | 0                  | 0                                 | 0                    | 1                     |
| AT3G08630 | 1                     | 1                              | 1                  | 0                                 | 1                    | 1                     |
| AT3G08640 | 1                     | 0                              | 0                  | 0                                 | 0                    | 1                     |
| AT3G08950 | 1                     | 0                              | 1                  | 0                                 | 1                    | 0                     |
| AT3G09200 | 1                     | 1                              | 0                  | 1                                 | 1                    | 1                     |
| AT3G09260 | 1                     | 1                              | 1                  | 1                                 | 1                    | 1                     |
| AT3G09300 | 0                     | 0                              | 0                  | 0                                 | 1                    | 0                     |
| AT3G09410 | 0                     | 0                              | 1                  | 0                                 | 0                    | 0                     |
| AT3G09440 | 1                     | 0                              | 1                  | 1                                 | 1                    | 0                     |
| AT3G09500 | 1                     | 0                              | 0                  | 0                                 | 1                    | 0                     |
| AT3G09630 | 1                     | 0                              | 0                  | 1                                 | 1                    | 0                     |
| AT3G09690 | 1                     | 0                              | 0                  | 0                                 | 0                    | 0                     |
| AT3G09740 | 1                     | 0                              | 0                  | 0                                 | 0                    | 0                     |
| AT3G09810 | 1                     | 1                              | 0                  | 0                                 | 1                    | 1                     |
| AT3G09820 | 1                     | 1                              | 0                  | 1                                 | 1                    | 1                     |
| AT3G09840 | 1                     | 1                              | 0                  | 1                                 | 1                    | 0                     |
| AT3G10050 | 1                     | 0                              | 0                  | 0                                 | 0                    | 0                     |
| AT3G10260 | 1                     | 0                              | 0                  | 0                                 | 0                    | 0                     |

**Supplementary Tables pertaining to Figure 1**

**Supplementary Table S2. The 1,995 proteins of the root cellular proteome**

| <b>Locus</b> | <b>Root Hairs<br/>(COBL9)</b> | <b>Non-Hair<br/>Epidermis<br/>(WER)</b> | <b>Cortex<br/>(CORTEX)</b> | <b>Endodermis<br/>/Quiescent<br/>(SCR)</b> | <b>Vasculature<br/>(WOL)</b> | <b>Columella<br/>(PET111)</b> |
|--------------|-------------------------------|-----------------------------------------|----------------------------|--------------------------------------------|------------------------------|-------------------------------|
| AT3G10370    | 1                             | 0                                       | 1                          | 0                                          | 1                            | 1                             |
| AT3G10380    | 0                             | 0                                       | 0                          | 0                                          | 1                            | 0                             |
| AT3G10410    | 1                             | 0                                       | 0                          | 0                                          | 0                            | 1                             |
| AT3G10690    | 1                             | 1                                       | 1                          | 0                                          | 1                            | 0                             |
| AT3G10730    | 0                             | 0                                       | 1                          | 0                                          | 0                            | 0                             |
| AT3G10920    | 1                             | 1                                       | 1                          | 1                                          | 1                            | 1                             |
| AT3G11070    | 1                             | 0                                       | 1                          | 0                                          | 1                            | 1                             |
| AT3G11130    | 1                             | 1                                       | 1                          | 1                                          | 1                            | 1                             |
| AT3G11170    | 1                             | 0                                       | 0                          | 0                                          | 0                            | 0                             |
| AT3G11250    | 0                             | 0                                       | 0                          | 1                                          | 0                            | 0                             |
| AT3G11400    | 1                             | 0                                       | 1                          | 0                                          | 1                            | 0                             |
| AT3G11630    | 1                             | 1                                       | 1                          | 0                                          | 1                            | 1                             |
| AT3G11710    | 1                             | 0                                       | 0                          | 0                                          | 1                            | 0                             |
| AT3G11730    | 1                             | 0                                       | 0                          | 0                                          | 0                            | 0                             |
| AT3G11830    | 1                             | 0                                       | 0                          | 1                                          | 1                            | 0                             |
| AT3G11940    | 0                             | 1                                       | 0                          | 1                                          | 0                            | 1                             |
| AT3G11964    | 1                             | 0                                       | 0                          | 0                                          | 1                            | 0                             |
| AT3G12030    | 1                             | 0                                       | 1                          | 0                                          | 1                            | 0                             |
| AT3G12050    | 0                             | 0                                       | 0                          | 0                                          | 1                            | 0                             |
| AT3G12120    | 1                             | 1                                       | 1                          | 1                                          | 1                            | 0                             |
| AT3G12260    | 1                             | 1                                       | 1                          | 1                                          | 1                            | 1                             |
| AT3G12290    | 1                             | 0                                       | 0                          | 0                                          | 0                            | 0                             |
| AT3G12370    | 1                             | 0                                       | 0                          | 0                                          | 0                            | 0                             |
| AT3G12670    | 0                             | 0                                       | 0                          | 0                                          | 1                            | 0                             |
| AT3G12780    | 1                             | 1                                       | 1                          | 1                                          | 1                            | 1                             |
| AT3G12800    | 1                             | 0                                       | 1                          | 0                                          | 0                            | 0                             |
| AT3G13110    | 0                             | 1                                       | 0                          | 0                                          | 0                            | 0                             |
| AT3G13160    | 1                             | 1                                       | 1                          | 1                                          | 1                            | 1                             |
| AT3G13300    | 0                             | 0                                       | 0                          | 0                                          | 1                            | 0                             |
| AT3G13460    | 1                             | 0                                       | 0                          | 0                                          | 0                            | 0                             |
| AT3G13470    | 1                             | 1                                       | 0                          | 1                                          | 1                            | 0                             |
| AT3G13530    | 0                             | 1                                       | 0                          | 0                                          | 0                            | 0                             |
| AT3G13580    | 1                             | 0                                       | 0                          | 1                                          | 0                            | 0                             |
| AT3G13772    | 1                             | 0                                       | 1                          | 1                                          | 1                            | 1                             |
| AT3G13860    | 1                             | 1                                       | 1                          | 1                                          | 1                            | 1                             |
| AT3G13870    | 1                             | 1                                       | 1                          | 0                                          | 1                            | 1                             |
| AT3G13920    | 1                             | 0                                       | 1                          | 1                                          | 1                            | 1                             |
| AT3G13930    | 1                             | 1                                       | 1                          | 1                                          | 1                            | 1                             |
| AT3G14067    | 1                             | 0                                       | 0                          | 0                                          | 1                            | 0                             |
| AT3G14220    | 1                             | 1                                       | 0                          | 0                                          | 0                            | 1                             |
| AT3G14290    | 0                             | 0                                       | 0                          | 0                                          | 0                            | 1                             |
| AT3G14390    | 1                             | 1                                       | 0                          | 0                                          | 0                            | 0                             |
| AT3G14790    | 0                             | 1                                       | 0                          | 0                                          | 0                            | 0                             |
| AT3G14840    | 0                             | 0                                       | 1                          | 0                                          | 0                            | 0                             |
| AT3G14990    | 0                             | 0                                       | 0                          | 1                                          | 0                            | 1                             |
| AT3G15000    | 1                             | 0                                       | 1                          | 0                                          | 1                            | 1                             |
| AT3G15020    | 1                             | 1                                       | 1                          | 1                                          | 1                            | 1                             |
| AT3G15090    | 1                             | 1                                       | 1                          | 1                                          | 1                            | 1                             |
| AT3G15290    | 1                             | 0                                       | 0                          | 0                                          | 0                            | 0                             |

**Supplementary Tables pertaining to Figure 1**

**Supplementary Table S2. The 1,995 proteins of the root cellular proteome**

| <b>Locus</b> | <b>Root Hairs<br/>(COBL9)</b> | <b>Non-Hair<br/>Epidermis<br/>(WER)</b> | <b>Cortex<br/>(CORTEX)</b> | <b>Endodermis<br/>/Quiescent<br/>(SCR)</b> | <b>Vasculature<br/>(WOL)</b> | <b>Columella<br/>(PET111)</b> |
|--------------|-------------------------------|-----------------------------------------|----------------------------|--------------------------------------------|------------------------------|-------------------------------|
| AT3G15640    | 1                             | 0                                       | 1                          | 0                                          | 1                            | 1                             |
| AT3G15660    | 1                             | 0                                       | 0                          | 0                                          | 0                            | 0                             |
| AT3G15730    | 1                             | 0                                       | 1                          | 1                                          | 1                            | 1                             |
| AT3G15950    | 1                             | 1                                       | 1                          | 1                                          | 1                            | 1                             |
| AT3G15980    | 1                             | 0                                       | 1                          | 0                                          | 1                            | 0                             |
| AT3G16110    | 1                             | 1                                       | 1                          | 0                                          | 1                            | 0                             |
| AT3G16200    | 1                             | 0                                       | 0                          | 0                                          | 0                            | 0                             |
| AT3G16400    | 0                             | 0                                       | 0                          | 0                                          | 1                            | 0                             |
| AT3G16410    | 1                             | 1                                       | 0                          | 0                                          | 1                            | 1                             |
| AT3G16420    | 1                             | 1                                       | 1                          | 0                                          | 1                            | 1                             |
| AT3G16430    | 1                             | 1                                       | 0                          | 0                                          | 0                            | 1                             |
| AT3G16450    | 1                             | 1                                       | 0                          | 0                                          | 0                            | 1                             |
| AT3G16460    | 1                             | 1                                       | 1                          | 0                                          | 1                            | 1                             |
| AT3G16480    | 1                             | 1                                       | 1                          | 1                                          | 1                            | 1                             |
| AT3G16640    | 1                             | 0                                       | 1                          | 1                                          | 1                            | 1                             |
| AT3G16950    | 1                             | 1                                       | 1                          | 1                                          | 1                            | 1                             |
| AT3G17210    | 0                             | 0                                       | 0                          | 0                                          | 1                            | 0                             |
| AT3G17240    | 1                             | 1                                       | 1                          | 1                                          | 1                            | 1                             |
| AT3G17390    | 1                             | 1                                       | 1                          | 0                                          | 1                            | 1                             |
| AT3G17465    | 1                             | 1                                       | 0                          | 0                                          | 1                            | 0                             |
| AT3G17810    | 1                             | 1                                       | 0                          | 1                                          | 0                            | 1                             |
| AT3G17820    | 0                             | 0                                       | 0                          | 1                                          | 0                            | 0                             |
| AT3G17910    | 1                             | 0                                       | 0                          | 0                                          | 0                            | 0                             |
| AT3G17940    | 0                             | 0                                       | 1                          | 0                                          | 1                            | 1                             |
| AT3G17970    | 1                             | 1                                       | 0                          | 1                                          | 0                            | 0                             |
| AT3G18000    | 0                             | 0                                       | 1                          | 0                                          | 0                            | 1                             |
| AT3G18060    | 0                             | 0                                       | 0                          | 0                                          | 1                            | 0                             |
| AT3G18130    | 0                             | 1                                       | 0                          | 1                                          | 1                            | 0                             |
| AT3G18190    | 1                             | 0                                       | 0                          | 1                                          | 1                            | 0                             |
| AT3G18240    | 0                             | 1                                       | 1                          | 0                                          | 0                            | 0                             |
| AT3G18410    | 1                             | 0                                       | 1                          | 0                                          | 0                            | 0                             |
| AT3G18430    | 0                             | 0                                       | 0                          | 0                                          | 0                            | 1                             |
| AT3G18580    | 1                             | 0                                       | 0                          | 0                                          | 1                            | 0                             |
| AT3G18760    | 1                             | 0                                       | 0                          | 0                                          | 0                            | 0                             |
| AT3G18820    | 1                             | 0                                       | 0                          | 0                                          | 1                            | 0                             |
| AT3G18830    | 0                             | 1                                       | 0                          | 0                                          | 0                            | 0                             |
| AT3G18860    | 1                             | 0                                       | 0                          | 0                                          | 1                            | 0                             |
| AT3G19170    | 1                             | 1                                       | 0                          | 1                                          | 1                            | 1                             |
| AT3G19390    | 1                             | 0                                       | 0                          | 0                                          | 1                            | 0                             |
| AT3G19430    | 0                             | 1                                       | 0                          | 0                                          | 0                            | 1                             |
| AT3G19450    | 0                             | 0                                       | 0                          | 1                                          | 0                            | 0                             |
| AT3G19508    | 1                             | 0                                       | 0                          | 0                                          | 0                            | 0                             |
| AT3G19760    | 0                             | 0                                       | 0                          | 1                                          | 0                            | 0                             |
| AT3G19820    | 1                             | 1                                       | 1                          | 1                                          | 1                            | 1                             |
| AT3G19870    | 0                             | 0                                       | 0                          | 0                                          | 0                            | 1                             |
| AT3G20000    | 1                             | 1                                       | 1                          | 1                                          | 1                            | 1                             |
| AT3G20050    | 1                             | 0                                       | 0                          | 1                                          | 1                            | 0                             |
| AT3G20130    | 1                             | 1                                       | 1                          | 0                                          | 0                            | 0                             |
| AT3G20320    | 0                             | 0                                       | 1                          | 1                                          | 0                            | 0                             |

**Supplementary Tables pertaining to Figure 1**

**Supplementary Table S2. The 1,995 proteins of the root cellular proteome**

| <b>Locus</b> | <b>Root Hairs<br/>(COBL9)</b> | <b>Non-Hair<br/>Epidermis<br/>(WER)</b> | <b>Cortex<br/>(CORTEX)</b> | <b>Endodermis<br/>/Quiescent<br/>(SCR)</b> | <b>Vasculature<br/>(WOL)</b> | <b>Columella<br/>(PET111)</b> |
|--------------|-------------------------------|-----------------------------------------|----------------------------|--------------------------------------------|------------------------------|-------------------------------|
| AT3G20330    | 1                             | 0                                       | 0                          | 0                                          | 1                            | 0                             |
| AT3G20370    | 1                             | 1                                       | 1                          | 0                                          | 1                            | 1                             |
| AT3G20390    | 1                             | 0                                       | 1                          | 0                                          | 1                            | 1                             |
| AT3G20410    | 0                             | 0                                       | 0                          | 0                                          | 1                            | 0                             |
| AT3G20670    | 0                             | 0                                       | 0                          | 0                                          | 0                            | 1                             |
| AT3G20790    | 0                             | 0                                       | 0                          | 0                                          | 1                            | 0                             |
| AT3G20940    | 1                             | 1                                       | 1                          | 0                                          | 1                            | 1                             |
| AT3G21110    | 1                             | 1                                       | 0                          | 0                                          | 0                            | 0                             |
| AT3G21140    | 1                             | 1                                       | 0                          | 1                                          | 1                            | 0                             |
| AT3G21160    | 0                             | 1                                       | 0                          | 0                                          | 0                            | 0                             |
| AT3G21190    | 1                             | 1                                       | 1                          | 0                                          | 0                            | 0                             |
| AT3G21400    | 1                             | 0                                       | 0                          | 0                                          | 0                            | 0                             |
| AT3G21465    | 1                             | 0                                       | 0                          | 0                                          | 0                            | 0                             |
| AT3G21540    | 1                             | 0                                       | 0                          | 0                                          | 0                            | 0                             |
| AT3G22110    | 1                             | 0                                       | 1                          | 1                                          | 1                            | 0                             |
| AT3G22200    | 1                             | 1                                       | 1                          | 1                                          | 1                            | 1                             |
| AT3G22230    | 0                             | 0                                       | 0                          | 1                                          | 0                            | 0                             |
| AT3G22290    | 1                             | 0                                       | 1                          | 0                                          | 1                            | 0                             |
| AT3G22310    | 1                             | 1                                       | 0                          | 0                                          | 1                            | 0                             |
| AT3G22320    | 1                             | 0                                       | 0                          | 0                                          | 1                            | 0                             |
| AT3G22330    | 0                             | 0                                       | 0                          | 1                                          | 1                            | 0                             |
| AT3G22370    | 1                             | 0                                       | 1                          | 0                                          | 0                            | 0                             |
| AT3G22630    | 1                             | 0                                       | 0                          | 0                                          | 1                            | 1                             |
| AT3G22845    | 1                             | 1                                       | 0                          | 0                                          | 0                            | 1                             |
| AT3G22890    | 0                             | 1                                       | 1                          | 1                                          | 1                            | 1                             |
| AT3G22960    | 1                             | 1                                       | 1                          | 1                                          | 1                            | 1                             |
| AT3G23160    | 0                             | 0                                       | 1                          | 0                                          | 0                            | 0                             |
| AT3G23180    | 1                             | 1                                       | 0                          | 0                                          | 0                            | 1                             |
| AT3G23190    | 1                             | 0                                       | 0                          | 0                                          | 0                            | 0                             |
| AT3G23300    | 1                             | 1                                       | 1                          | 0                                          | 1                            | 1                             |
| AT3G23400    | 1                             | 0                                       | 1                          | 0                                          | 0                            | 1                             |
| AT3G23510    | 1                             | 0                                       | 0                          | 0                                          | 0                            | 0                             |
| AT3G23530    | 1                             | 1                                       | 1                          | 0                                          | 1                            | 0                             |
| AT3G23600    | 1                             | 0                                       | 0                          | 0                                          | 0                            | 0                             |
| AT3G23750    | 1                             | 1                                       | 1                          | 0                                          | 1                            | 0                             |
| AT3G23820    | 1                             | 1                                       | 1                          | 0                                          | 1                            | 0                             |
| AT3G23940    | 1                             | 1                                       | 1                          | 1                                          | 1                            | 1                             |
| AT3G23990    | 1                             | 1                                       | 1                          | 1                                          | 1                            | 1                             |
| AT3G24040    | 1                             | 0                                       | 1                          | 0                                          | 1                            | 0                             |
| AT3G24160    | 1                             | 0                                       | 0                          | 0                                          | 1                            | 0                             |
| AT3G24170    | 1                             | 0                                       | 1                          | 1                                          | 0                            | 0                             |
| AT3G24200    | 1                             | 1                                       | 0                          | 0                                          | 0                            | 0                             |
| AT3G24503    | 1                             | 0                                       | 0                          | 0                                          | 0                            | 0                             |
| AT3G24830    | 1                             | 1                                       | 0                          | 1                                          | 1                            | 0                             |
| AT3G25110    | 1                             | 1                                       | 0                          | 1                                          | 1                            | 0                             |
| AT3G25140    | 1                             | 0                                       | 1                          | 0                                          | 1                            | 0                             |
| AT3G25220    | 0                             | 0                                       | 1                          | 0                                          | 0                            | 1                             |
| AT3G25230    | 0                             | 0                                       | 1                          | 1                                          | 1                            | 0                             |
| AT3G25290    | 0                             | 0                                       | 0                          | 1                                          | 0                            | 0                             |

**Supplementary Tables pertaining to Figure 1**  
**Supplementary Table S2. The 1,995 proteins of the root cellular proteome**

| Locus     | Root Hairs<br>(COBL9) | Non-Hair<br>Epidermis<br>(WER) | Cortex<br>(CORTEX) | Endodermis<br>/Quiescent<br>(SCR) | Vasculature<br>(WOL) | Columella<br>(PET111) |
|-----------|-----------------------|--------------------------------|--------------------|-----------------------------------|----------------------|-----------------------|
| AT3G25520 | 1                     | 0                              | 0                  | 1                                 | 0                    | 0                     |
| AT3G25530 | 1                     | 0                              | 0                  | 0                                 | 1                    | 0                     |
| AT3G25585 | 0                     | 0                              | 1                  | 0                                 | 0                    | 0                     |
| AT3G25780 | 1                     | 0                              | 1                  | 0                                 | 1                    | 1                     |
| AT3G25800 | 0                     | 0                              | 0                  | 0                                 | 1                    | 0                     |
| AT3G25860 | 1                     | 1                              | 1                  | 1                                 | 1                    | 1                     |
| AT3G26370 | 1                     | 0                              | 1                  | 0                                 | 1                    | 0                     |
| AT3G26520 | 1                     | 1                              | 1                  | 1                                 | 1                    | 1                     |
| AT3G26720 | 1                     | 1                              | 1                  | 1                                 | 1                    | 0                     |
| AT3G26950 | 0                     | 0                              | 1                  | 0                                 | 0                    | 0                     |
| AT3G27020 | 1                     | 0                              | 0                  | 0                                 | 0                    | 0                     |
| AT3G27080 | 1                     | 0                              | 0                  | 0                                 | 1                    | 0                     |
| AT3G27230 | 1                     | 0                              | 0                  | 0                                 | 0                    | 0                     |
| AT3G27240 | 1                     | 1                              | 1                  | 1                                 | 1                    | 1                     |
| AT3G27280 | 1                     | 1                              | 1                  | 1                                 | 0                    | 1                     |
| AT3G27300 | 1                     | 0                              | 0                  | 0                                 | 0                    | 0                     |
| AT3G27325 | 1                     | 0                              | 1                  | 0                                 | 0                    | 0                     |
| AT3G27380 | 1                     | 1                              | 1                  | 1                                 | 1                    | 1                     |
| AT3G27430 | 1                     | 0                              | 0                  | 0                                 | 0                    | 0                     |
| AT3G27570 | 1                     | 1                              | 0                  | 0                                 | 1                    | 0                     |
| AT3G27740 | 1                     | 1                              | 1                  | 1                                 | 1                    | 0                     |
| AT3G27890 | 1                     | 0                              | 0                  | 0                                 | 0                    | 0                     |
| AT3G27930 | 1                     | 0                              | 0                  | 0                                 | 1                    | 0                     |
| AT3G28480 | 1                     | 0                              | 0                  | 0                                 | 0                    | 0                     |
| AT3G28710 | 1                     | 0                              | 1                  | 1                                 | 1                    | 0                     |
| AT3G28715 | 1                     | 1                              | 1                  | 1                                 | 1                    | 1                     |
| AT3G28720 | 1                     | 1                              | 1                  | 0                                 | 1                    | 0                     |
| AT3G28860 | 0                     | 0                              | 1                  | 1                                 | 1                    | 0                     |
| AT3G29250 | 1                     | 0                              | 0                  | 0                                 | 0                    | 0                     |
| AT3G29320 | 1                     | 1                              | 0                  | 0                                 | 0                    | 1                     |
| AT3G29360 | 1                     | 0                              | 0                  | 0                                 | 0                    | 0                     |
| AT3G32980 | 0                     | 0                              | 0                  | 1                                 | 0                    | 0                     |
| AT3G42050 | 1                     | 1                              | 1                  | 1                                 | 1                    | 1                     |
| AT3G43300 | 1                     | 0                              | 1                  | 0                                 | 1                    | 1                     |
| AT3G43520 | 0                     | 0                              | 0                  | 0                                 | 1                    | 1                     |
| AT3G44100 | 1                     | 0                              | 1                  | 0                                 | 1                    | 1                     |
| AT3G44110 | 0                     | 0                              | 0                  | 0                                 | 1                    | 0                     |
| AT3G44160 | 0                     | 1                              | 0                  | 0                                 | 0                    | 0                     |
| AT3G44190 | 0                     | 0                              | 1                  | 0                                 | 0                    | 0                     |
| AT3G44310 | 0                     | 0                              | 1                  | 0                                 | 0                    | 0                     |
| AT3G44320 | 0                     | 0                              | 1                  | 1                                 | 0                    | 0                     |
| AT3G44330 | 1                     | 1                              | 1                  | 1                                 | 1                    | 1                     |
| AT3G44830 | 0                     | 0                              | 0                  | 0                                 | 0                    | 1                     |
| AT3G45300 | 0                     | 0                              | 0                  | 0                                 | 0                    | 1                     |
| AT3G45600 | 0                     | 0                              | 0                  | 0                                 | 1                    | 1                     |
| AT3G46040 | 0                     | 0                              | 0                  | 0                                 | 0                    | 1                     |
| AT3G46210 | 0                     | 0                              | 0                  | 0                                 | 1                    | 0                     |
| AT3G46560 | 1                     | 0                              | 0                  | 0                                 | 0                    | 0                     |
| AT3G46740 | 1                     | 1                              | 1                  | 1                                 | 1                    | 1                     |

**Supplementary Tables pertaining to Figure 1**

**Supplementary Table S2. The 1,995 proteins of the root cellular proteome**

| <b>Locus</b> | <b>Root Hairs<br/>(COBL9)</b> | <b>Non-Hair<br/>Epidermis<br/>(WER)</b> | <b>Cortex<br/>(CORTEX)</b> | <b>Endodermis<br/>/Quiescent<br/>(SCR)</b> | <b>Vasculature<br/>(WOL)</b> | <b>Columella<br/>(PET111)</b> |
|--------------|-------------------------------|-----------------------------------------|----------------------------|--------------------------------------------|------------------------------|-------------------------------|
| AT3G46830    | 1                             | 0                                       | 1                          | 0                                          | 1                            | 1                             |
| AT3G46940    | 0                             | 0                                       | 0                          | 0                                          | 1                            | 0                             |
| AT3G46970    | 1                             | 0                                       | 0                          | 0                                          | 0                            | 1                             |
| AT3G47370    | 0                             | 0                                       | 0                          | 0                                          | 1                            | 0                             |
| AT3G47520    | 1                             | 1                                       | 1                          | 1                                          | 1                            | 1                             |
| AT3G47670    | 0                             | 1                                       | 0                          | 0                                          | 0                            | 0                             |
| AT3G47730    | 0                             | 0                                       | 0                          | 0                                          | 0                            | 1                             |
| AT3G47930    | 1                             | 1                                       | 1                          | 0                                          | 1                            | 1                             |
| AT3G47960    | 0                             | 0                                       | 1                          | 0                                          | 0                            | 0                             |
| AT3G48000    | 1                             | 1                                       | 1                          | 1                                          | 1                            | 1                             |
| AT3G48110    | 1                             | 0                                       | 0                          | 0                                          | 0                            | 0                             |
| AT3G48140    | 1                             | 0                                       | 1                          | 0                                          | 0                            | 0                             |
| AT3G48170    | 1                             | 1                                       | 0                          | 0                                          | 0                            | 1                             |
| AT3G48340    | 1                             | 1                                       | 1                          | 0                                          | 1                            | 1                             |
| AT3G48410    | 1                             | 0                                       | 1                          | 0                                          | 1                            | 1                             |
| AT3G48560    | 1                             | 1                                       | 0                          | 0                                          | 0                            | 0                             |
| AT3G48680    | 1                             | 0                                       | 1                          | 0                                          | 0                            | 1                             |
| AT3G48730    | 1                             | 0                                       | 1                          | 0                                          | 0                            | 0                             |
| AT3G48870    | 0                             | 1                                       | 1                          | 1                                          | 1                            | 0                             |
| AT3G48890    | 1                             | 0                                       | 0                          | 0                                          | 0                            | 0                             |
| AT3G48930    | 0                             | 0                                       | 1                          | 0                                          | 1                            | 0                             |
| AT3G49010    | 1                             | 0                                       | 0                          | 0                                          | 1                            | 0                             |
| AT3G49080    | 1                             | 0                                       | 0                          | 0                                          | 1                            | 0                             |
| AT3G49190    | 0                             | 1                                       | 0                          | 0                                          | 0                            | 0                             |
| AT3G49240    | 0                             | 1                                       | 0                          | 0                                          | 1                            | 0                             |
| AT3G49560    | 1                             | 1                                       | 0                          | 0                                          | 1                            | 0                             |
| AT3G49680    | 1                             | 1                                       | 1                          | 0                                          | 1                            | 0                             |
| AT3G49720    | 1                             | 1                                       | 1                          | 1                                          | 1                            | 1                             |
| AT3G49910    | 1                             | 0                                       | 0                          | 1                                          | 1                            | 1                             |
| AT3G51050    | 1                             | 0                                       | 1                          | 0                                          | 1                            | 0                             |
| AT3G51100    | 0                             | 0                                       | 0                          | 0                                          | 1                            | 0                             |
| AT3G51160    | 1                             | 0                                       | 0                          | 0                                          | 0                            | 1                             |
| AT3G51240    | 0                             | 0                                       | 0                          | 1                                          | 0                            | 0                             |
| AT3G51260    | 1                             | 1                                       | 1                          | 1                                          | 1                            | 1                             |
| AT3G51440    | 1                             | 0                                       | 0                          | 0                                          | 0                            | 0                             |
| AT3G51460    | 1                             | 0                                       | 1                          | 0                                          | 1                            | 0                             |
| AT3G51550    | 0                             | 0                                       | 1                          | 0                                          | 0                            | 0                             |
| AT3G51670    | 0                             | 0                                       | 0                          | 0                                          | 1                            | 0                             |
| AT3G51800    | 1                             | 0                                       | 0                          | 0                                          | 1                            | 0                             |
| AT3G51830    | 1                             | 0                                       | 0                          | 0                                          | 0                            | 0                             |
| AT3G51840    | 1                             | 1                                       | 1                          | 0                                          | 1                            | 1                             |
| AT3G51980    | 1                             | 0                                       | 0                          | 0                                          | 0                            | 0                             |
| AT3G52140    | 0                             | 0                                       | 0                          | 0                                          | 1                            | 0                             |
| AT3G52180    | 0                             | 0                                       | 0                          | 0                                          | 0                            | 1                             |
| AT3G52190    | 1                             | 0                                       | 0                          | 0                                          | 0                            | 0                             |
| AT3G52200    | 1                             | 1                                       | 1                          | 0                                          | 1                            | 1                             |
| AT3G52230    | 0                             | 0                                       | 0                          | 0                                          | 0                            | 1                             |
| AT3G52300    | 1                             | 1                                       | 1                          | 1                                          | 1                            | 1                             |
| AT3G52570    | 1                             | 0                                       | 0                          | 0                                          | 0                            | 0                             |



**Supplementary Tables pertaining to Figure 1**

**Supplementary Table S2. The 1,995 proteins of the root cellular proteome**

| <b>Locus</b> | <b>Root Hairs<br/>(COBL9)</b> | <b>Non-Hair<br/>Epidermis<br/>(WER)</b> | <b>Cortex<br/>(CORTEX)</b> | <b>Endodermis<br/>/Quiescent<br/>(SCR)</b> | <b>Vasculature<br/>(WOL)</b> | <b>Columella<br/>(PET111)</b> |
|--------------|-------------------------------|-----------------------------------------|----------------------------|--------------------------------------------|------------------------------|-------------------------------|
| AT3G52580    | 0                             | 0                                       | 0                          | 0                                          | 1                            | 0                             |
| AT3G52640    | 1                             | 0                                       | 0                          | 0                                          | 0                            | 0                             |
| AT3G52730    | 1                             | 0                                       | 0                          | 0                                          | 1                            | 0                             |
| AT3G52850    | 0                             | 0                                       | 1                          | 0                                          | 0                            | 0                             |
| AT3G52880    | 0                             | 0                                       | 0                          | 0                                          | 1                            | 1                             |
| AT3G52930    | 1                             | 1                                       | 1                          | 1                                          | 1                            | 1                             |
| AT3G52940    | 0                             | 0                                       | 0                          | 1                                          | 0                            | 0                             |
| AT3G52960    | 1                             | 1                                       | 1                          | 1                                          | 1                            | 0                             |
| AT3G53180    | 1                             | 0                                       | 0                          | 0                                          | 0                            | 0                             |
| AT3G53230    | 0                             | 0                                       | 0                          | 1                                          | 0                            | 0                             |
| AT3G53420    | 0                             | 0                                       | 1                          | 1                                          | 0                            | 1                             |
| AT3G53430    | 0                             | 1                                       | 0                          | 0                                          | 0                            | 0                             |
| AT3G53460    | 0                             | 1                                       | 0                          | 0                                          | 0                            | 0                             |
| AT3G53480    | 1                             | 1                                       | 0                          | 0                                          | 0                            | 1                             |
| AT3G53520    | 1                             | 1                                       | 1                          | 1                                          | 1                            | 1                             |
| AT3G53580    | 1                             | 1                                       | 0                          | 0                                          | 1                            | 1                             |
| AT3G53740    | 1                             | 0                                       | 0                          | 0                                          | 1                            | 0                             |
| AT3G53900    | 1                             | 0                                       | 0                          | 0                                          | 0                            | 0                             |
| AT3G53990    | 1                             | 0                                       | 0                          | 0                                          | 0                            | 0                             |
| AT3G54110    | 1                             | 1                                       | 1                          | 1                                          | 1                            | 1                             |
| AT3G54470    | 0                             | 0                                       | 0                          | 0                                          | 1                            | 0                             |
| AT3G54640    | 0                             | 1                                       | 0                          | 0                                          | 0                            | 0                             |
| AT3G54660    | 1                             | 0                                       | 1                          | 0                                          | 0                            | 0                             |
| AT3G54840    | 1                             | 0                                       | 0                          | 0                                          | 0                            | 0                             |
| AT3G54960    | 1                             | 1                                       | 1                          | 1                                          | 1                            | 1                             |
| AT3G54980    | 0                             | 1                                       | 0                          | 0                                          | 1                            | 0                             |
| AT3G55010    | 1                             | 0                                       | 0                          | 1                                          | 1                            | 1                             |
| AT3G55030    | 1                             | 0                                       | 0                          | 0                                          | 0                            | 1                             |
| AT3G55360    | 1                             | 1                                       | 1                          | 1                                          | 1                            | 0                             |
| AT3G55410    | 1                             | 1                                       | 1                          | 1                                          | 1                            | 1                             |
| AT3G55440    | 1                             | 1                                       | 1                          | 1                                          | 1                            | 1                             |
| AT3G55610    | 0                             | 0                                       | 1                          | 0                                          | 0                            | 0                             |
| AT3G55760    | 0                             | 1                                       | 0                          | 0                                          | 0                            | 0                             |
| AT3G55830    | 0                             | 0                                       | 0                          | 1                                          | 0                            | 0                             |
| AT3G55920    | 1                             | 0                                       | 0                          | 0                                          | 0                            | 0                             |
| AT3G56070    | 1                             | 1                                       | 1                          | 1                                          | 1                            | 1                             |
| AT3G56090    | 1                             | 1                                       | 1                          | 1                                          | 1                            | 0                             |
| AT3G56150    | 1                             | 1                                       | 1                          | 1                                          | 1                            | 0                             |
| AT3G56170    | 0                             | 0                                       | 0                          | 0                                          | 0                            | 1                             |
| AT3G56190    | 1                             | 0                                       | 1                          | 1                                          | 1                            | 1                             |
| AT3G56310    | 1                             | 0                                       | 1                          | 0                                          | 0                            | 1                             |
| AT3G56460    | 1                             | 1                                       | 0                          | 0                                          | 1                            | 1                             |
| AT3G56490    | 0                             | 0                                       | 0                          | 0                                          | 1                            | 0                             |
| AT3G56900    | 1                             | 0                                       | 0                          | 0                                          | 0                            | 0                             |
| AT3G56950    | 1                             | 0                                       | 0                          | 0                                          | 0                            | 0                             |
| AT3G57010    | 0                             | 1                                       | 1                          | 1                                          | 1                            | 1                             |
| AT3G57020    | 1                             | 0                                       | 1                          | 0                                          | 1                            | 1                             |
| AT3G57030    | 0                             | 0                                       | 0                          | 0                                          | 1                            | 1                             |
| AT3G57050    | 1                             | 0                                       | 1                          | 0                                          | 1                            | 1                             |

**Supplementary Tables pertaining to Figure 1**  
**Supplementary Table S2. The 1,995 proteins of the root cellular proteome**

| Locus     | Root Hairs<br>(COBL9) | Non-Hair<br>Epidermis<br>(WER) | Cortex<br>(CORTEX) | Endodermis<br>/Quiescent<br>(SCR) | Vasculature<br>(WOL) | Columella<br>(PET111) |
|-----------|-----------------------|--------------------------------|--------------------|-----------------------------------|----------------------|-----------------------|
| AT3G57150 | 1                     | 0                              | 0                  | 1                                 | 1                    | 0                     |
| AT3G57220 | 0                     | 0                              | 0                  | 0                                 | 1                    | 0                     |
| AT3G57280 | 1                     | 1                              | 1                  | 0                                 | 1                    | 1                     |
| AT3G57290 | 1                     | 0                              | 0                  | 0                                 | 1                    | 0                     |
| AT3G57410 | 0                     | 0                              | 0                  | 0                                 | 1                    | 0                     |
| AT3G57420 | 0                     | 0                              | 1                  | 0                                 | 0                    | 0                     |
| AT3G57560 | 1                     | 0                              | 0                  | 0                                 | 0                    | 0                     |
| AT3G57610 | 1                     | 1                              | 1                  | 1                                 | 1                    | 1                     |
| AT3G57630 | 1                     | 0                              | 0                  | 0                                 | 0                    | 0                     |
| AT3G57650 | 1                     | 0                              | 0                  | 1                                 | 1                    | 1                     |
| AT3G57660 | 1                     | 0                              | 0                  | 0                                 | 0                    | 0                     |
| AT3G57680 | 0                     | 1                              | 0                  | 0                                 | 0                    | 0                     |
| AT3G58010 | 0                     | 0                              | 0                  | 0                                 | 0                    | 1                     |
| AT3G58140 | 1                     | 0                              | 0                  | 0                                 | 0                    | 0                     |
| AT3G58510 | 0                     | 0                              | 0                  | 0                                 | 1                    | 0                     |
| AT3G58610 | 1                     | 1                              | 1                  | 1                                 | 1                    | 1                     |
| AT3G58730 | 1                     | 1                              | 1                  | 1                                 | 1                    | 1                     |
| AT3G58750 | 1                     | 1                              | 0                  | 0                                 | 1                    | 1                     |
| AT3G58840 | 1                     | 0                              | 0                  | 0                                 | 0                    | 0                     |
| AT3G59020 | 0                     | 0                              | 0                  | 1                                 | 0                    | 0                     |
| AT3G59280 | 0                     | 0                              | 0                  | 0                                 | 1                    | 0                     |
| AT3G59360 | 0                     | 1                              | 0                  | 0                                 | 0                    | 0                     |
| AT3G59650 | 1                     | 0                              | 0                  | 0                                 | 1                    | 0                     |
| AT3G59760 | 1                     | 1                              | 1                  | 1                                 | 1                    | 1                     |
| AT3G59820 | 1                     | 1                              | 0                  | 0                                 | 1                    | 0                     |
| AT3G59890 | 0                     | 0                              | 0                  | 0                                 | 1                    | 0                     |
| AT3G59920 | 1                     | 0                              | 1                  | 1                                 | 1                    | 0                     |
| AT3G59970 | 1                     | 0                              | 0                  | 1                                 | 0                    | 0                     |
| AT3G59990 | 0                     | 0                              | 0                  | 0                                 | 1                    | 0                     |
| AT3G60100 | 0                     | 0                              | 1                  | 0                                 | 0                    | 0                     |
| AT3G60245 | 0                     | 0                              | 0                  | 0                                 | 1                    | 0                     |
| AT3G60340 | 0                     | 0                              | 0                  | 0                                 | 0                    | 1                     |
| AT3G60440 | 1                     | 0                              | 0                  | 0                                 | 0                    | 0                     |
| AT3G60600 | 1                     | 0                              | 0                  | 0                                 | 1                    | 0                     |
| AT3G60750 | 1                     | 1                              | 1                  | 1                                 | 1                    | 1                     |
| AT3G60770 | 0                     | 0                              | 0                  | 0                                 | 1                    | 0                     |
| AT3G60820 | 1                     | 1                              | 1                  | 0                                 | 1                    | 1                     |
| AT3G60850 | 1                     | 0                              | 0                  | 0                                 | 0                    | 0                     |
| AT3G60860 | 0                     | 0                              | 0                  | 0                                 | 1                    | 0                     |
| AT3G60900 | 0                     | 1                              | 0                  | 0                                 | 0                    | 1                     |
| AT3G61050 | 0                     | 1                              | 1                  | 0                                 | 1                    | 1                     |
| AT3G61070 | 1                     | 1                              | 1                  | 1                                 | 1                    | 1                     |
| AT3G61130 | 1                     | 0                              | 1                  | 0                                 | 0                    | 1                     |
| AT3G61430 | 1                     | 0                              | 1                  | 1                                 | 0                    | 1                     |
| AT3G61440 | 1                     | 0                              | 1                  | 1                                 | 1                    | 1                     |
| AT3G61520 | 1                     | 0                              | 0                  | 0                                 | 0                    | 0                     |
| AT3G61580 | 0                     | 0                              | 0                  | 0                                 | 1                    | 0                     |
| AT3G62030 | 1                     | 1                              | 0                  | 1                                 | 0                    | 1                     |
| AT3G62360 | 1                     | 1                              | 1                  | 1                                 | 1                    | 1                     |

**Supplementary Tables pertaining to Figure 1**

**Supplementary Table S2. The 1,995 proteins of the root cellular proteome**

| <b>Locus</b> | <b>Root Hairs<br/>(COBL9)</b> | <b>Non-Hair<br/>Epidermis<br/>(WER)</b> | <b>Cortex<br/>(CORTEX)</b> | <b>Endodermis<br/>/Quiescent<br/>(SCR)</b> | <b>Vasculature<br/>(WOL)</b> | <b>Columella<br/>(PET111)</b> |
|--------------|-------------------------------|-----------------------------------------|----------------------------|--------------------------------------------|------------------------------|-------------------------------|
| AT3G62530    | 1                             | 0                                       | 0                          | 0                                          | 1                            | 1                             |
| AT3G62580    | 0                             | 0                                       | 1                          | 0                                          | 0                            | 0                             |
| AT3G62600    | 1                             | 1                                       | 1                          | 0                                          | 1                            | 1                             |
| AT3G62700    | 0                             | 0                                       | 1                          | 1                                          | 1                            | 0                             |
| AT3G62830    | 1                             | 1                                       | 1                          | 1                                          | 1                            | 1                             |
| AT3G62870    | 0                             | 0                                       | 0                          | 1                                          | 0                            | 1                             |
| AT3G63130    | 0                             | 0                                       | 0                          | 0                                          | 1                            | 0                             |
| AT3G63150    | 1                             | 0                                       | 0                          | 0                                          | 1                            | 0                             |
| AT3G63190    | 1                             | 0                                       | 0                          | 0                                          | 0                            | 0                             |
| AT3G63410    | 0                             | 1                                       | 1                          | 1                                          | 1                            | 1                             |
| AT3G63460    | 1                             | 0                                       | 1                          | 1                                          | 1                            | 1                             |
| AT3G66654    | 1                             | 0                                       | 1                          | 0                                          | 1                            | 0                             |
| AT3G66658    | 1                             | 0                                       | 1                          | 1                                          | 1                            | 0                             |
| AT4G00040    | 1                             | 0                                       | 0                          | 0                                          | 0                            | 0                             |
| AT4G00090    | 1                             | 0                                       | 0                          | 0                                          | 1                            | 0                             |
| AT4G00100    | 1                             | 0                                       | 0                          | 0                                          | 0                            | 0                             |
| AT4G00290    | 1                             | 0                                       | 0                          | 0                                          | 0                            | 0                             |
| AT4G00430    | 0                             | 1                                       | 0                          | 0                                          | 0                            | 0                             |
| AT4G00490    | 1                             | 1                                       | 0                          | 0                                          | 0                            | 1                             |
| AT4G00570    | 1                             | 1                                       | 1                          | 0                                          | 1                            | 1                             |
| AT4G00620    | 1                             | 1                                       | 0                          | 0                                          | 0                            | 0                             |
| AT4G00630    | 1                             | 1                                       | 1                          | 0                                          | 1                            | 1                             |
| AT4G00710    | 1                             | 0                                       | 0                          | 0                                          | 0                            | 0                             |
| AT4G00740    | 1                             | 1                                       | 1                          | 0                                          | 1                            | 1                             |
| AT4G00750    | 0                             | 0                                       | 0                          | 0                                          | 0                            | 1                             |
| AT4G00860    | 1                             | 0                                       | 1                          | 1                                          | 1                            | 1                             |
| AT4G01100    | 1                             | 1                                       | 1                          | 1                                          | 1                            | 1                             |
| AT4G01210    | 0                             | 0                                       | 0                          | 0                                          | 1                            | 0                             |
| AT4G01320    | 1                             | 1                                       | 1                          | 1                                          | 1                            | 0                             |
| AT4G01610    | 1                             | 0                                       | 1                          | 0                                          | 0                            | 0                             |
| AT4G01660    | 1                             | 0                                       | 0                          | 0                                          | 0                            | 0                             |
| AT4G01690    | 0                             | 1                                       | 0                          | 0                                          | 0                            | 1                             |
| AT4G01750    | 0                             | 0                                       | 0                          | 0                                          | 0                            | 1                             |
| AT4G01850    | 1                             | 1                                       | 1                          | 0                                          | 1                            | 0                             |
| AT4G01900    | 1                             | 0                                       | 1                          | 0                                          | 1                            | 0                             |
| AT4G02450    | 1                             | 0                                       | 1                          | 0                                          | 1                            | 0                             |
| AT4G02500    | 1                             | 1                                       | 1                          | 0                                          | 1                            | 0                             |
| AT4G02510    | 1                             | 1                                       | 1                          | 1                                          | 0                            | 0                             |
| AT4G02580    | 1                             | 1                                       | 1                          | 1                                          | 1                            | 1                             |
| AT4G02620    | 1                             | 0                                       | 1                          | 0                                          | 0                            | 1                             |
| AT4G02930    | 1                             | 1                                       | 1                          | 1                                          | 1                            | 1                             |
| AT4G03190    | 0                             | 0                                       | 0                          | 0                                          | 1                            | 0                             |
| AT4G03550    | 0                             | 0                                       | 1                          | 0                                          | 1                            | 0                             |
| AT4G03560    | 1                             | 0                                       | 1                          | 1                                          | 1                            | 1                             |
| AT4G04190    | 0                             | 0                                       | 1                          | 0                                          | 0                            | 0                             |
| AT4G04470    | 1                             | 0                                       | 0                          | 0                                          | 0                            | 0                             |
| AT4G04860    | 1                             | 0                                       | 0                          | 0                                          | 0                            | 0                             |
| AT4G04910    | 1                             | 0                                       | 0                          | 0                                          | 1                            | 0                             |
| AT4G04940    | 0                             | 0                                       | 0                          | 0                                          | 1                            | 0                             |

**Supplementary Tables pertaining to Figure 1**  
**Supplementary Table S2. The 1,995 proteins of the root cellular proteome**

| <b>Locus</b> | <b>Root Hairs<br/>(COBL9)</b> | <b>Non-Hair<br/>Epidermis<br/>(WER)</b> | <b>Cortex<br/>(CORTEX)</b> | <b>Endodermis<br/>/Quiescent<br/>(SCR)</b> | <b>Vasculature<br/>(WOL)</b> | <b>Columella<br/>(PET111)</b> |
|--------------|-------------------------------|-----------------------------------------|----------------------------|--------------------------------------------|------------------------------|-------------------------------|
| AT4G05020    | 1                             | 1                                       | 1                          | 1                                          | 1                            | 1                             |
| AT4G05160    | 1                             | 1                                       | 1                          | 0                                          | 1                            | 1                             |
| AT4G05390    | 1                             | 0                                       | 1                          | 0                                          | 1                            | 1                             |
| AT4G05400    | 1                             | 0                                       | 0                          | 0                                          | 1                            | 0                             |
| AT4G05420    | 0                             | 0                                       | 0                          | 1                                          | 1                            | 0                             |
| AT4G05530    | 1                             | 0                                       | 0                          | 0                                          | 0                            | 1                             |
| AT4G08390    | 1                             | 1                                       | 1                          | 1                                          | 1                            | 1                             |
| AT4G08520    | 0                             | 0                                       | 0                          | 0                                          | 1                            | 0                             |
| AT4G08770    | 0                             | 0                                       | 0                          | 1                                          | 1                            | 0                             |
| AT4G08790    | 0                             | 0                                       | 0                          | 0                                          | 1                            | 0                             |
| AT4G08810    | 1                             | 0                                       | 1                          | 0                                          | 0                            | 0                             |
| AT4G09000    | 1                             | 1                                       | 1                          | 1                                          | 1                            | 1                             |
| AT4G09020    | 1                             | 1                                       | 0                          | 0                                          | 0                            | 1                             |
| AT4G09320    | 1                             | 1                                       | 1                          | 1                                          | 1                            | 1                             |
| AT4G09720    | 1                             | 1                                       | 0                          | 0                                          | 0                            | 1                             |
| AT4G09990    | 1                             | 0                                       | 0                          | 0                                          | 0                            | 0                             |
| AT4G10260    | 0                             | 0                                       | 0                          | 0                                          | 1                            | 0                             |
| AT4G10280    | 0                             | 0                                       | 0                          | 1                                          | 0                            | 0                             |
| AT4G10320    | 1                             | 0                                       | 0                          | 1                                          | 1                            | 0                             |
| AT4G10450    | 1                             | 0                                       | 0                          | 1                                          | 1                            | 0                             |
| AT4G10480    | 1                             | 0                                       | 1                          | 1                                          | 1                            | 0                             |
| AT4G10750    | 1                             | 1                                       | 1                          | 0                                          | 1                            | 1                             |
| AT4G11010    | 1                             | 1                                       | 1                          | 1                                          | 1                            | 1                             |
| AT4G11120    | 1                             | 1                                       | 0                          | 0                                          | 0                            | 0                             |
| AT4G11150    | 1                             | 1                                       | 1                          | 1                                          | 1                            | 1                             |
| AT4G11290    | 0                             | 0                                       | 0                          | 1                                          | 0                            | 0                             |
| AT4G11380    | 1                             | 0                                       | 0                          | 0                                          | 1                            | 0                             |
| AT4G11420    | 0                             | 0                                       | 0                          | 1                                          | 1                            | 0                             |
| AT4G11600    | 1                             | 0                                       | 0                          | 0                                          | 0                            | 0                             |
| AT4G11610    | 1                             | 0                                       | 0                          | 0                                          | 1                            | 0                             |
| AT4G11820    | 1                             | 0                                       | 0                          | 1                                          | 1                            | 0                             |
| AT4G11850    | 0                             | 0                                       | 0                          | 0                                          | 1                            | 0                             |
| AT4G12130    | 1                             | 0                                       | 0                          | 0                                          | 0                            | 0                             |
| AT4G12420    | 0                             | 1                                       | 1                          | 0                                          | 0                            | 0                             |
| AT4G12590    | 1                             | 1                                       | 0                          | 1                                          | 1                            | 1                             |
| AT4G12600    | 1                             | 0                                       | 0                          | 1                                          | 1                            | 0                             |
| AT4G12650    | 1                             | 1                                       | 1                          | 1                                          | 1                            | 1                             |
| AT4G12750    | 0                             | 0                                       | 0                          | 1                                          | 0                            | 0                             |
| AT4G13050    | 1                             | 0                                       | 0                          | 0                                          | 0                            | 0                             |
| AT4G13200    | 1                             | 0                                       | 0                          | 0                                          | 0                            | 0                             |
| AT4G13430    | 1                             | 1                                       | 1                          | 1                                          | 1                            | 1                             |
| AT4G13720    | 1                             | 0                                       | 0                          | 0                                          | 1                            | 0                             |
| AT4G13780    | 0                             | 0                                       | 0                          | 1                                          | 1                            | 0                             |
| AT4G13850    | 1                             | 0                                       | 0                          | 0                                          | 1                            | 0                             |
| AT4G13930    | 1                             | 1                                       | 1                          | 1                                          | 1                            | 1                             |
| AT4G13940    | 1                             | 1                                       | 1                          | 1                                          | 1                            | 1                             |
| AT4G14160    | 0                             | 0                                       | 0                          | 1                                          | 0                            | 0                             |
| AT4G14360    | 0                             | 0                                       | 1                          | 0                                          | 1                            | 0                             |
| AT4G14420    | 1                             | 0                                       | 0                          | 0                                          | 1                            | 1                             |

**Supplementary Tables pertaining to Figure 1**  
**Supplementary Table S2. The 1,995 proteins of the root cellular proteome**

| <b>Locus</b> | <b>Root Hairs<br/>(COBL9)</b> | <b>Non-Hair<br/>Epidermis<br/>(WER)</b> | <b>Cortex<br/>(CORTEX)</b> | <b>Endodermis<br/>/Quiescent<br/>(SCR)</b> | <b>Vasculature<br/>(WOL)</b> | <b>Columella<br/>(PET111)</b> |
|--------------|-------------------------------|-----------------------------------------|----------------------------|--------------------------------------------|------------------------------|-------------------------------|
| AT4G14430    | 0                             | 0                                       | 0                          | 0                                          | 0                            | 1                             |
| AT4G14570    | 1                             | 0                                       | 0                          | 1                                          | 1                            | 0                             |
| AT4G14680    | 0                             | 0                                       | 0                          | 0                                          | 1                            | 0                             |
| AT4G14800    | 1                             | 0                                       | 0                          | 1                                          | 1                            | 0                             |
| AT4G14880    | 1                             | 1                                       | 1                          | 0                                          | 1                            | 1                             |
| AT4G15000    | 0                             | 0                                       | 0                          | 1                                          | 1                            | 0                             |
| AT4G15640    | 1                             | 0                                       | 1                          | 0                                          | 1                            | 0                             |
| AT4G16120    | 0                             | 0                                       | 1                          | 0                                          | 1                            | 0                             |
| AT4G16143    | 0                             | 0                                       | 0                          | 1                                          | 1                            | 0                             |
| AT4G16155    | 1                             | 1                                       | 0                          | 1                                          | 1                            | 1                             |
| AT4G16170    | 1                             | 1                                       | 1                          | 0                                          | 0                            | 0                             |
| AT4G16180    | 1                             | 0                                       | 0                          | 0                                          | 0                            | 0                             |
| AT4G16210    | 1                             | 0                                       | 0                          | 0                                          | 0                            | 0                             |
| AT4G16340    | 0                             | 0                                       | 0                          | 1                                          | 0                            | 0                             |
| AT4G16450    | 1                             | 0                                       | 1                          | 1                                          | 1                            | 1                             |
| AT4G16500    | 1                             | 0                                       | 0                          | 0                                          | 0                            | 0                             |
| AT4G16660    | 1                             | 1                                       | 1                          | 1                                          | 1                            | 1                             |
| AT4G16760    | 1                             | 1                                       | 1                          | 1                                          | 1                            | 0                             |
| AT4G17040    | 1                             | 0                                       | 0                          | 0                                          | 0                            | 0                             |
| AT4G17140    | 1                             | 0                                       | 0                          | 0                                          | 0                            | 1                             |
| AT4G17170    | 1                             | 0                                       | 0                          | 0                                          | 1                            | 1                             |
| AT4G17270    | 0                             | 0                                       | 0                          | 0                                          | 1                            | 0                             |
| AT4G17420    | 1                             | 0                                       | 0                          | 0                                          | 0                            | 0                             |
| AT4G17530    | 1                             | 0                                       | 0                          | 0                                          | 0                            | 1                             |
| AT4G18030    | 1                             | 1                                       | 1                          | 1                                          | 1                            | 1                             |
| AT4G18100    | 1                             | 0                                       | 0                          | 1                                          | 1                            | 0                             |
| AT4G18230    | 1                             | 0                                       | 0                          | 0                                          | 0                            | 0                             |
| AT4G18360    | 0                             | 0                                       | 1                          | 0                                          | 0                            | 0                             |
| AT4G18440    | 1                             | 0                                       | 0                          | 0                                          | 1                            | 0                             |
| AT4G18760    | 0                             | 0                                       | 1                          | 0                                          | 0                            | 0                             |
| AT4G18800    | 0                             | 1                                       | 0                          | 0                                          | 0                            | 1                             |
| AT4G18830    | 0                             | 0                                       | 0                          | 0                                          | 1                            | 0                             |
| AT4G19006    | 0                             | 0                                       | 0                          | 0                                          | 1                            | 0                             |
| AT4G19120    | 1                             | 0                                       | 1                          | 0                                          | 1                            | 0                             |
| AT4G19460    | 0                             | 0                                       | 0                          | 0                                          | 0                            | 1                             |
| AT4G19640    | 0                             | 0                                       | 0                          | 0                                          | 0                            | 1                             |
| AT4G19710    | 1                             | 1                                       | 0                          | 0                                          | 0                            | 0                             |
| AT4G20020    | 1                             | 0                                       | 0                          | 0                                          | 0                            | 0                             |
| AT4G20360    | 1                             | 1                                       | 0                          | 0                                          | 0                            | 0                             |
| AT4G20460    | 1                             | 0                                       | 0                          | 0                                          | 0                            | 0                             |
| AT4G20830    | 1                             | 0                                       | 0                          | 0                                          | 1                            | 0                             |
| AT4G20850    | 1                             | 1                                       | 1                          | 1                                          | 1                            | 1                             |
| AT4G20890    | 0                             | 1                                       | 0                          | 0                                          | 0                            | 0                             |
| AT4G20980    | 0                             | 0                                       | 0                          | 0                                          | 1                            | 0                             |
| AT4G21105    | 0                             | 0                                       | 0                          | 1                                          | 0                            | 0                             |
| AT4G21150    | 1                             | 1                                       | 1                          | 1                                          | 1                            | 1                             |
| AT4G21180    | 1                             | 0                                       | 0                          | 0                                          | 0                            | 0                             |
| AT4G21540    | 1                             | 0                                       | 0                          | 0                                          | 0                            | 0                             |
| AT4G21570    | 1                             | 0                                       | 0                          | 0                                          | 0                            | 0                             |

**Supplementary Tables pertaining to Figure 1**

**Supplementary Table S2. The 1,995 proteins of the root cellular proteome**

| <b>Locus</b> | <b>Root Hairs<br/>(COBL9)</b> | <b>Non-Hair<br/>Epidermis<br/>(WER)</b> | <b>Cortex<br/>(CORTEX)</b> | <b>Endodermis<br/>/Quiescent<br/>(SCR)</b> | <b>Vasculature<br/>(WOL)</b> | <b>Columella<br/>(PET111)</b> |
|--------------|-------------------------------|-----------------------------------------|----------------------------|--------------------------------------------|------------------------------|-------------------------------|
| AT4G21710    | 0                             | 1                                       | 0                          | 1                                          | 0                            | 0                             |
| AT4G22214    | 1                             | 0                                       | 0                          | 0                                          | 0                            | 0                             |
| AT4G22240    | 1                             | 0                                       | 0                          | 0                                          | 0                            | 1                             |
| AT4G22310    | 0                             | 0                                       | 0                          | 0                                          | 0                            | 1                             |
| AT4G22330    | 0                             | 0                                       | 0                          | 1                                          | 1                            | 1                             |
| AT4G22930    | 1                             | 1                                       | 1                          | 1                                          | 1                            | 0                             |
| AT4G23100    | 1                             | 0                                       | 1                          | 1                                          | 1                            | 0                             |
| AT4G23430    | 0                             | 1                                       | 0                          | 0                                          | 0                            | 0                             |
| AT4G23460    | 0                             | 0                                       | 0                          | 0                                          | 1                            | 0                             |
| AT4G23540    | 0                             | 0                                       | 0                          | 0                                          | 1                            | 0                             |
| AT4G23590    | 1                             | 1                                       | 0                          | 0                                          | 0                            | 1                             |
| AT4G23620    | 1                             | 0                                       | 1                          | 0                                          | 1                            | 0                             |
| AT4G23630    | 0                             | 0                                       | 0                          | 0                                          | 0                            | 1                             |
| AT4G23640    | 1                             | 0                                       | 0                          | 0                                          | 0                            | 0                             |
| AT4G23650    | 0                             | 0                                       | 0                          | 0                                          | 1                            | 0                             |
| AT4G23690    | 0                             | 0                                       | 0                          | 0                                          | 1                            | 0                             |
| AT4G23710    | 1                             | 0                                       | 0                          | 0                                          | 1                            | 0                             |
| AT4G23850    | 0                             | 0                                       | 0                          | 0                                          | 0                            | 1                             |
| AT4G23900    | 0                             | 0                                       | 0                          | 1                                          | 0                            | 0                             |
| AT4G23920    | 0                             | 0                                       | 0                          | 0                                          | 0                            | 1                             |
| AT4G24190    | 1                             | 1                                       | 1                          | 1                                          | 1                            | 1                             |
| AT4G24280    | 1                             | 1                                       | 1                          | 1                                          | 1                            | 0                             |
| AT4G24310    | 0                             | 1                                       | 0                          | 0                                          | 0                            | 0                             |
| AT4G24330    | 1                             | 1                                       | 1                          | 1                                          | 1                            | 1                             |
| AT4G24520    | 1                             | 0                                       | 0                          | 0                                          | 1                            | 0                             |
| AT4G24550    | 0                             | 0                                       | 0                          | 0                                          | 1                            | 0                             |
| AT4G24620    | 1                             | 1                                       | 1                          | 1                                          | 1                            | 1                             |
| AT4G24820    | 1                             | 0                                       | 1                          | 1                                          | 1                            | 0                             |
| AT4G24830    | 1                             | 1                                       | 0                          | 1                                          | 1                            | 1                             |
| AT4G25240    | 0                             | 0                                       | 0                          | 0                                          | 1                            | 1                             |
| AT4G25360    | 0                             | 0                                       | 1                          | 0                                          | 0                            | 0                             |
| AT4G25450    | 0                             | 0                                       | 0                          | 0                                          | 0                            | 1                             |
| AT4G25570    | 1                             | 0                                       | 0                          | 0                                          | 0                            | 0                             |
| AT4G25630    | 1                             | 0                                       | 0                          | 1                                          | 1                            | 0                             |
| AT4G25740    | 0                             | 0                                       | 0                          | 1                                          | 0                            | 0                             |
| AT4G26010    | 1                             | 0                                       | 0                          | 0                                          | 0                            | 0                             |
| AT4G26110    | 0                             | 0                                       | 0                          | 1                                          | 0                            | 0                             |
| AT4G26210    | 0                             | 0                                       | 0                          | 0                                          | 1                            | 0                             |
| AT4G26300    | 1                             | 0                                       | 0                          | 1                                          | 1                            | 0                             |
| AT4G26410    | 1                             | 1                                       | 1                          | 1                                          | 1                            | 1                             |
| AT4G26570    | 1                             | 0                                       | 0                          | 0                                          | 0                            | 1                             |
| AT4G26610    | 0                             | 0                                       | 0                          | 1                                          | 0                            | 0                             |
| AT4G26780    | 1                             | 1                                       | 0                          | 1                                          | 1                            | 1                             |
| AT4G26900    | 1                             | 1                                       | 1                          | 1                                          | 1                            | 0                             |
| AT4G26910    | 1                             | 1                                       | 1                          | 0                                          | 1                            | 1                             |
| AT4G26970    | 1                             | 1                                       | 0                          | 0                                          | 1                            | 1                             |
| AT4G27080    | 0                             | 1                                       | 0                          | 0                                          | 0                            | 0                             |
| AT4G27090    | 1                             | 0                                       | 0                          | 1                                          | 1                            | 1                             |
| AT4G27160    | 0                             | 0                                       | 0                          | 0                                          | 1                            | 0                             |

**Supplementary Tables pertaining to Figure 1**  
**Supplementary Table S2. The 1,995 proteins of the root cellular proteome**

| Locus     | Root Hairs<br>(COBL9) | Non-Hair<br>Epidermis<br>(WER) | Cortex<br>(CORTEX) | Endodermis<br>/Quiescent<br>(SCR) | Vasculature<br>(WOL) | Columella<br>(PET111) |
|-----------|-----------------------|--------------------------------|--------------------|-----------------------------------|----------------------|-----------------------|
| AT4G27170 | 0                     | 0                              | 0                  | 0                                 | 1                    | 0                     |
| AT4G27400 | 0                     | 0                              | 0                  | 0                                 | 0                    | 1                     |
| AT4G27500 | 1                     | 0                              | 0                  | 0                                 | 1                    | 0                     |
| AT4G27585 | 1                     | 1                              | 1                  | 0                                 | 1                    | 1                     |
| AT4G27640 | 1                     | 0                              | 0                  | 0                                 | 0                    | 0                     |
| AT4G27720 | 1                     | 0                              | 0                  | 0                                 | 0                    | 0                     |
| AT4G27760 | 1                     | 1                              | 1                  | 0                                 | 1                    | 1                     |
| AT4G27860 | 1                     | 1                              | 0                  | 0                                 | 0                    | 0                     |
| AT4G28050 | 1                     | 0                              | 0                  | 0                                 | 0                    | 0                     |
| AT4G28220 | 1                     | 1                              | 0                  | 0                                 | 0                    | 1                     |
| AT4G28390 | 0                     | 0                              | 0                  | 0                                 | 0                    | 1                     |
| AT4G28510 | 1                     | 1                              | 1                  | 1                                 | 1                    | 1                     |
| AT4G28520 | 0                     | 0                              | 1                  | 0                                 | 1                    | 0                     |
| AT4G29010 | 1                     | 1                              | 1                  | 0                                 | 1                    | 1                     |
| AT4G29120 | 0                     | 0                              | 0                  | 0                                 | 1                    | 0                     |
| AT4G29130 | 1                     | 1                              | 1                  | 1                                 | 1                    | 1                     |
| AT4G29350 | 1                     | 0                              | 1                  | 0                                 | 1                    | 0                     |
| AT4G29430 | 1                     | 0                              | 0                  | 0                                 | 0                    | 0                     |
| AT4G29480 | 1                     | 0                              | 1                  | 0                                 | 1                    | 1                     |
| AT4G29520 | 1                     | 1                              | 1                  | 1                                 | 1                    | 1                     |
| AT4G29680 | 1                     | 1                              | 1                  | 0                                 | 0                    | 1                     |
| AT4G29690 | 1                     | 1                              | 1                  | 0                                 | 1                    | 1                     |
| AT4G29840 | 1                     | 1                              | 1                  | 1                                 | 1                    | 1                     |
| AT4G29900 | 0                     | 0                              | 0                  | 0                                 | 1                    | 0                     |
| AT4G30010 | 1                     | 0                              | 1                  | 1                                 | 1                    | 1                     |
| AT4G30080 | 0                     | 0                              | 0                  | 0                                 | 1                    | 0                     |
| AT4G30160 | 1                     | 0                              | 0                  | 0                                 | 1                    | 0                     |
| AT4G30170 | 1                     | 0                              | 1                  | 0                                 | 0                    | 0                     |
| AT4G30190 | 1                     | 1                              | 1                  | 0                                 | 1                    | 1                     |
| AT4G30210 | 1                     | 0                              | 0                  | 0                                 | 1                    | 0                     |
| AT4G30440 | 0                     | 0                              | 1                  | 0                                 | 1                    | 0                     |
| AT4G30920 | 1                     | 0                              | 1                  | 0                                 | 1                    | 0                     |
| AT4G30930 | 1                     | 1                              | 0                  | 1                                 | 1                    | 0                     |
| AT4G30996 | 1                     | 1                              | 1                  | 0                                 | 1                    | 0                     |
| AT4G31180 | 0                     | 0                              | 0                  | 1                                 | 0                    | 0                     |
| AT4G31300 | 1                     | 0                              | 0                  | 1                                 | 1                    | 0                     |
| AT4G31340 | 1                     | 1                              | 1                  | 1                                 | 1                    | 1                     |
| AT4G31460 | 1                     | 0                              | 0                  | 0                                 | 0                    | 0                     |
| AT4G31480 | 0                     | 0                              | 0                  | 1                                 | 0                    | 0                     |
| AT4G31500 | 0                     | 1                              | 0                  | 0                                 | 1                    | 1                     |
| AT4G31700 | 0                     | 0                              | 0                  | 0                                 | 1                    | 0                     |
| AT4G31810 | 1                     | 1                              | 1                  | 0                                 | 1                    | 1                     |
| AT4G31880 | 1                     | 0                              | 0                  | 0                                 | 1                    | 0                     |
| AT4G31990 | 1                     | 1                              | 1                  | 1                                 | 1                    | 1                     |
| AT4G32120 | 0                     | 1                              | 0                  | 0                                 | 0                    | 0                     |
| AT4G32130 | 1                     | 1                              | 0                  | 0                                 | 1                    | 1                     |
| AT4G32400 | 1                     | 0                              | 1                  | 0                                 | 1                    | 1                     |
| AT4G32410 | 1                     | 1                              | 1                  | 1                                 | 1                    | 0                     |
| AT4G32470 | 1                     | 1                              | 1                  | 0                                 | 1                    | 1                     |

**Supplementary Tables pertaining to Figure 1**  
**Supplementary Table S2. The 1,995 proteins of the root cellular proteome**

| <b>Locus</b> | <b>Root Hairs<br/>(COBL9)</b> | <b>Non-Hair<br/>Epidermis<br/>(WER)</b> | <b>Cortex<br/>(CORTEX)</b> | <b>Endodermis<br/>/Quiescent<br/>(SCR)</b> | <b>Vasculature<br/>(WOL)</b> | <b>Columella<br/>(PET111)</b> |
|--------------|-------------------------------|-----------------------------------------|----------------------------|--------------------------------------------|------------------------------|-------------------------------|
| AT4G32520    | 1                             | 1                                       | 1                          | 0                                          | 1                            | 0                             |
| AT4G32720    | 0                             | 0                                       | 0                          | 1                                          | 0                            | 0                             |
| AT4G32880    | 1                             | 0                                       | 0                          | 0                                          | 0                            | 0                             |
| AT4G32920    | 0                             | 0                                       | 0                          | 0                                          | 0                            | 1                             |
| AT4G33010    | 1                             | 1                                       | 1                          | 1                                          | 1                            | 0                             |
| AT4G33090    | 1                             | 1                                       | 1                          | 1                                          | 1                            | 1                             |
| AT4G33120    | 1                             | 1                                       | 1                          | 0                                          | 1                            | 1                             |
| AT4G33250    | 1                             | 0                                       | 0                          | 0                                          | 1                            | 0                             |
| AT4G33360    | 1                             | 1                                       | 1                          | 1                                          | 1                            | 1                             |
| AT4G33530    | 1                             | 0                                       | 0                          | 0                                          | 1                            | 0                             |
| AT4G33580    | 1                             | 1                                       | 0                          | 1                                          | 0                            | 0                             |
| AT4G33650    | 0                             | 0                                       | 0                          | 0                                          | 1                            | 0                             |
| AT4G33680    | 1                             | 1                                       | 1                          | 1                                          | 1                            | 1                             |
| AT4G34140    | 1                             | 0                                       | 0                          | 0                                          | 0                            | 0                             |
| AT4G34180    | 1                             | 0                                       | 0                          | 0                                          | 0                            | 0                             |
| AT4G34200    | 1                             | 1                                       | 1                          | 1                                          | 1                            | 1                             |
| AT4G34450    | 1                             | 1                                       | 1                          | 1                                          | 1                            | 1                             |
| AT4G34640    | 1                             | 1                                       | 1                          | 0                                          | 1                            | 1                             |
| AT4G34670    | 0                             | 0                                       | 0                          | 1                                          | 1                            | 0                             |
| AT4G34700    | 1                             | 1                                       | 1                          | 1                                          | 1                            | 1                             |
| AT4G34870    | 1                             | 1                                       | 1                          | 1                                          | 1                            | 1                             |
| AT4G34960    | 0                             | 1                                       | 0                          | 1                                          | 0                            | 0                             |
| AT4G35000    | 1                             | 1                                       | 1                          | 1                                          | 1                            | 1                             |
| AT4G35090    | 1                             | 1                                       | 1                          | 1                                          | 1                            | 1                             |
| AT4G35100    | 1                             | 1                                       | 1                          | 1                                          | 1                            | 1                             |
| AT4G35260    | 1                             | 1                                       | 1                          | 1                                          | 1                            | 1                             |
| AT4G35490    | 0                             | 0                                       | 0                          | 0                                          | 1                            | 0                             |
| AT4G35580    | 0                             | 0                                       | 0                          | 0                                          | 1                            | 0                             |
| AT4G35630    | 1                             | 0                                       | 1                          | 1                                          | 1                            | 1                             |
| AT4G35790    | 0                             | 1                                       | 1                          | 0                                          | 1                            | 1                             |
| AT4G35830    | 1                             | 0                                       | 1                          | 1                                          | 1                            | 1                             |
| AT4G35850    | 1                             | 1                                       | 1                          | 0                                          | 1                            | 1                             |
| AT4G35860    | 1                             | 0                                       | 0                          | 0                                          | 0                            | 0                             |
| AT4G36080    | 0                             | 0                                       | 1                          | 0                                          | 1                            | 0                             |
| AT4G36195    | 1                             | 0                                       | 1                          | 0                                          | 0                            | 0                             |
| AT4G36250    | 1                             | 1                                       | 0                          | 0                                          | 0                            | 0                             |
| AT4G36480    | 1                             | 0                                       | 1                          | 0                                          | 1                            | 0                             |
| AT4G36680    | 1                             | 1                                       | 0                          | 0                                          | 1                            | 0                             |
| AT4G37190    | 0                             | 0                                       | 0                          | 0                                          | 1                            | 0                             |
| AT4G37640    | 1                             | 0                                       | 1                          | 0                                          | 1                            | 1                             |
| AT4G37820    | 1                             | 1                                       | 0                          | 0                                          | 1                            | 1                             |
| AT4G37830    | 1                             | 0                                       | 1                          | 0                                          | 1                            | 1                             |
| AT4G37870    | 0                             | 1                                       | 0                          | 0                                          | 1                            | 1                             |
| AT4G37910    | 1                             | 1                                       | 1                          | 1                                          | 1                            | 1                             |
| AT4G38220    | 1                             | 1                                       | 1                          | 1                                          | 1                            | 1                             |
| AT4G38350    | 1                             | 0                                       | 1                          | 0                                          | 1                            | 1                             |
| AT4G38510    | 1                             | 1                                       | 1                          | 0                                          | 1                            | 1                             |
| AT4G38630    | 0                             | 0                                       | 0                          | 0                                          | 1                            | 0                             |
| AT4G38740    | 1                             | 0                                       | 1                          | 1                                          | 1                            | 1                             |



**Supplementary Tables pertaining to Figure 1**  
**Supplementary Table S2. The 1,995 proteins of the root cellular proteome**

| Locus     | Root Hairs<br>(COBL9) | Non-Hair<br>Epidermis<br>(WER) | Cortex<br>(CORTEX) | Endodermis<br>/Quiescent<br>(SCR) | Vasculature<br>(WOL) | Columella<br>(PET111) |
|-----------|-----------------------|--------------------------------|--------------------|-----------------------------------|----------------------|-----------------------|
| AT4G38790 | 0                     | 0                              | 0                  | 0                                 | 0                    | 1                     |
| AT4G38800 | 0                     | 0                              | 0                  | 1                                 | 1                    | 0                     |
| AT4G39080 | 1                     | 1                              | 1                  | 1                                 | 1                    | 1                     |
| AT4G39120 | 1                     | 0                              | 0                  | 0                                 | 1                    | 0                     |
| AT4G39200 | 0                     | 0                              | 0                  | 0                                 | 1                    | 0                     |
| AT4G39260 | 1                     | 0                              | 0                  | 1                                 | 1                    | 1                     |
| AT4G39460 | 0                     | 1                              | 0                  | 0                                 | 0                    | 0                     |
| AT4G39660 | 1                     | 1                              | 1                  | 1                                 | 1                    | 1                     |
| AT4G39690 | 1                     | 1                              | 1                  | 0                                 | 1                    | 0                     |
| AT4G39730 | 0                     | 0                              | 1                  | 0                                 | 0                    | 1                     |
| AT4G39740 | 1                     | 0                              | 0                  | 0                                 | 1                    | 0                     |
| AT4G39980 | 1                     | 1                              | 1                  | 0                                 | 1                    | 0                     |
| AT5G01220 | 1                     | 0                              | 0                  | 0                                 | 0                    | 0                     |
| AT5G01500 | 0                     | 0                              | 1                  | 0                                 | 1                    | 1                     |
| AT5G01600 | 0                     | 0                              | 1                  | 1                                 | 0                    | 0                     |
| AT5G01750 | 0                     | 0                              | 1                  | 0                                 | 0                    | 0                     |
| AT5G02050 | 1                     | 0                              | 0                  | 0                                 | 0                    | 0                     |
| AT5G02240 | 0                     | 0                              | 0                  | 0                                 | 0                    | 1                     |
| AT5G02260 | 0                     | 1                              | 0                  | 0                                 | 0                    | 0                     |
| AT5G02500 | 1                     | 1                              | 1                  | 1                                 | 1                    | 1                     |
| AT5G02530 | 0                     | 0                              | 0                  | 0                                 | 1                    | 0                     |
| AT5G02740 | 1                     | 1                              | 1                  | 1                                 | 1                    | 1                     |
| AT5G02870 | 1                     | 0                              | 0                  | 0                                 | 1                    | 0                     |
| AT5G02960 | 1                     | 0                              | 0                  | 0                                 | 1                    | 0                     |
| AT5G03080 | 1                     | 0                              | 0                  | 0                                 | 0                    | 1                     |
| AT5G03160 | 1                     | 1                              | 1                  | 0                                 | 1                    | 1                     |
| AT5G03290 | 1                     | 1                              | 1                  | 0                                 | 1                    | 1                     |
| AT5G03300 | 0                     | 0                              | 0                  | 1                                 | 1                    | 0                     |
| AT5G03630 | 1                     | 1                              | 1                  | 1                                 | 1                    | 1                     |
| AT5G03860 | 0                     | 0                              | 1                  | 0                                 | 0                    | 0                     |
| AT5G04430 | 1                     | 0                              | 0                  | 0                                 | 1                    | 0                     |
| AT5G04590 | 1                     | 1                              | 1                  | 1                                 | 1                    | 1                     |
| AT5G04610 | 0                     | 0                              | 0                  | 0                                 | 0                    | 1                     |
| AT5G04710 | 1                     | 0                              | 0                  | 0                                 | 0                    | 0                     |
| AT5G04740 | 1                     | 0                              | 1                  | 0                                 | 0                    | 0                     |
| AT5G04830 | 0                     | 0                              | 1                  | 0                                 | 0                    | 1                     |
| AT5G04960 | 1                     | 0                              | 0                  | 0                                 | 0                    | 0                     |
| AT5G04990 | 1                     | 1                              | 0                  | 0                                 | 0                    | 0                     |
| AT5G05000 | 1                     | 0                              | 1                  | 1                                 | 1                    | 0                     |
| AT5G05010 | 1                     | 0                              | 1                  | 0                                 | 1                    | 0                     |
| AT5G05170 | 1                     | 1                              | 1                  | 1                                 | 1                    | 0                     |
| AT5G05520 | 1                     | 1                              | 1                  | 0                                 | 1                    | 1                     |
| AT5G05670 | 1                     | 0                              | 0                  | 0                                 | 1                    | 0                     |
| AT5G05690 | 0                     | 0                              | 0                  | 0                                 | 1                    | 0                     |
| AT5G05780 | 1                     | 0                              | 0                  | 0                                 | 1                    | 0                     |
| AT5G05990 | 1                     | 0                              | 0                  | 0                                 | 0                    | 0                     |
| AT5G06060 | 0                     | 0                              | 0                  | 0                                 | 1                    | 0                     |
| AT5G07340 | 1                     | 1                              | 1                  | 0                                 | 1                    | 1                     |
| AT5G07350 | 1                     | 0                              | 0                  | 0                                 | 0                    | 0                     |

**Supplementary Tables pertaining to Figure 1**

**Supplementary Table S2. The 1,995 proteins of the root cellular proteome**

| <b>Locus</b> | <b>Root Hairs<br/>(COBL9)</b> | <b>Non-Hair<br/>Epidermis<br/>(WER)</b> | <b>Cortex<br/>(CORTEX)</b> | <b>Endodermis<br/>/Quiescent<br/>(SCR)</b> | <b>Vasculature<br/>(WOL)</b> | <b>Columella<br/>(PET111)</b> |
|--------------|-------------------------------|-----------------------------------------|----------------------------|--------------------------------------------|------------------------------|-------------------------------|
| AT5G07440    | 1                             | 1                                       | 1                          | 1                                          | 1                            | 1                             |
| AT5G07980    | 0                             | 0                                       | 1                          | 0                                          | 0                            | 0                             |
| AT5G07990    | 0                             | 0                                       | 1                          | 0                                          | 0                            | 0                             |
| AT5G08060    | 1                             | 0                                       | 1                          | 1                                          | 1                            | 1                             |
| AT5G08160    | 1                             | 1                                       | 1                          | 1                                          | 1                            | 1                             |
| AT5G08180    | 1                             | 0                                       | 0                          | 0                                          | 1                            | 0                             |
| AT5G08280    | 1                             | 0                                       | 0                          | 1                                          | 1                            | 0                             |
| AT5G08300    | 1                             | 1                                       | 1                          | 1                                          | 1                            | 1                             |
| AT5G08530    | 1                             | 1                                       | 1                          | 1                                          | 1                            | 1                             |
| AT5G08540    | 1                             | 1                                       | 0                          | 0                                          | 1                            | 1                             |
| AT5G08580    | 0                             | 0                                       | 0                          | 0                                          | 0                            | 1                             |
| AT5G08610    | 0                             | 0                                       | 0                          | 0                                          | 1                            | 0                             |
| AT5G08670    | 0                             | 0                                       | 0                          | 0                                          | 1                            | 0                             |
| AT5G09420    | 0                             | 0                                       | 0                          | 0                                          | 1                            | 0                             |
| AT5G09450    | 1                             | 0                                       | 0                          | 0                                          | 0                            | 0                             |
| AT5G09510    | 0                             | 0                                       | 0                          | 0                                          | 1                            | 0                             |
| AT5G09590    | 1                             | 1                                       | 1                          | 1                                          | 1                            | 1                             |
| AT5G09650    | 1                             | 1                                       | 1                          | 0                                          | 1                            | 1                             |
| AT5G09810    | 1                             | 1                                       | 0                          | 1                                          | 1                            | 1                             |
| AT5G09840    | 1                             | 0                                       | 0                          | 0                                          | 1                            | 0                             |
| AT5G09900    | 1                             | 0                                       | 0                          | 0                                          | 1                            | 0                             |
| AT5G10100    | 0                             | 0                                       | 0                          | 1                                          | 0                            | 0                             |
| AT5G10160    | 1                             | 1                                       | 1                          | 1                                          | 1                            | 1                             |
| AT5G10450    | 1                             | 0                                       | 0                          | 1                                          | 1                            | 0                             |
| AT5G10540    | 0                             | 0                                       | 0                          | 0                                          | 1                            | 0                             |
| AT5G10560    | 0                             | 0                                       | 0                          | 0                                          | 0                            | 1                             |
| AT5G10730    | 1                             | 0                                       | 1                          | 0                                          | 1                            | 1                             |
| AT5G10780    | 0                             | 1                                       | 0                          | 0                                          | 1                            | 1                             |
| AT5G10830    | 1                             | 0                                       | 0                          | 0                                          | 0                            | 0                             |
| AT5G10840    | 1                             | 1                                       | 1                          | 1                                          | 1                            | 1                             |
| AT5G10860    | 1                             | 1                                       | 0                          | 0                                          | 0                            | 1                             |
| AT5G10920    | 1                             | 1                                       | 0                          | 0                                          | 1                            | 0                             |
| AT5G11240    | 0                             | 0                                       | 0                          | 0                                          | 1                            | 0                             |
| AT5G11520    | 1                             | 1                                       | 1                          | 0                                          | 1                            | 1                             |
| AT5G11560    | 1                             | 1                                       | 1                          | 1                                          | 1                            | 1                             |
| AT5G11670    | 1                             | 0                                       | 0                          | 0                                          | 1                            | 1                             |
| AT5G11700    | 0                             | 0                                       | 0                          | 0                                          | 1                            | 0                             |
| AT5G11730    | 0                             | 0                                       | 1                          | 0                                          | 0                            | 0                             |
| AT5G11770    | 1                             | 1                                       | 1                          | 1                                          | 1                            | 1                             |
| AT5G11880    | 1                             | 1                                       | 1                          | 1                                          | 1                            | 1                             |
| AT5G12040    | 1                             | 0                                       | 1                          | 1                                          | 1                            | 0                             |
| AT5G12200    | 1                             | 0                                       | 0                          | 0                                          | 0                            | 0                             |
| AT5G12290    | 1                             | 1                                       | 0                          | 0                                          | 1                            | 0                             |
| AT5G12470    | 1                             | 1                                       | 1                          | 1                                          | 1                            | 1                             |
| AT5G12860    | 1                             | 0                                       | 1                          | 1                                          | 1                            | 0                             |
| AT5G12950    | 0                             | 1                                       | 0                          | 0                                          | 0                            | 0                             |
| AT5G13000    | 0                             | 0                                       | 0                          | 0                                          | 1                            | 0                             |
| AT5G13110    | 0                             | 0                                       | 0                          | 1                                          | 1                            | 0                             |
| AT5G13120    | 1                             | 0                                       | 0                          | 1                                          | 1                            | 0                             |

**Supplementary Tables pertaining to Figure 1**  
**Supplementary Table S2. The 1,995 proteins of the root cellular proteome**

| Locus     | Root Hairs<br>(COBL9) | Non-Hair<br>Epidermis<br>(WER) | Cortex<br>(CORTEX) | Endodermis<br>/Quiescent<br>(SCR) | Vasculature<br>(WOL) | Columella<br>(PET111) |
|-----------|-----------------------|--------------------------------|--------------------|-----------------------------------|----------------------|-----------------------|
| AT5G13280 | 1                     | 1                              | 0                  | 0                                 | 0                    | 0                     |
| AT5G13420 | 1                     | 1                              | 1                  | 1                                 | 1                    | 1                     |
| AT5G13450 | 1                     | 1                              | 1                  | 1                                 | 1                    | 1                     |
| AT5G13490 | 1                     | 1                              | 1                  | 1                                 | 1                    | 1                     |
| AT5G13520 | 0                     | 0                              | 0                  | 0                                 | 1                    | 0                     |
| AT5G13640 | 1                     | 0                              | 1                  | 0                                 | 0                    | 0                     |
| AT5G13710 | 1                     | 1                              | 1                  | 1                                 | 1                    | 1                     |
| AT5G13930 | 0                     | 0                              | 1                  | 0                                 | 1                    | 0                     |
| AT5G13980 | 1                     | 0                              | 0                  | 0                                 | 1                    | 1                     |
| AT5G14030 | 1                     | 1                              | 1                  | 1                                 | 1                    | 1                     |
| AT5G14040 | 1                     | 1                              | 1                  | 1                                 | 1                    | 1                     |
| AT5G14060 | 1                     | 0                              | 0                  | 0                                 | 0                    | 0                     |
| AT5G14105 | 0                     | 0                              | 0                  | 0                                 | 1                    | 0                     |
| AT5G14220 | 0                     | 0                              | 1                  | 0                                 | 0                    | 0                     |
| AT5G14430 | 0                     | 1                              | 1                  | 0                                 | 0                    | 0                     |
| AT5G14520 | 0                     | 0                              | 0                  | 1                                 | 0                    | 0                     |
| AT5G14580 | 1                     | 0                              | 0                  | 0                                 | 0                    | 0                     |
| AT5G14590 | 1                     | 1                              | 0                  | 0                                 | 1                    | 0                     |
| AT5G14950 | 1                     | 1                              | 1                  | 0                                 | 1                    | 0                     |
| AT5G15090 | 1                     | 1                              | 1                  | 1                                 | 1                    | 1                     |
| AT5G15200 | 1                     | 0                              | 0                  | 1                                 | 1                    | 1                     |
| AT5G15350 | 1                     | 0                              | 1                  | 1                                 | 1                    | 0                     |
| AT5G15450 | 0                     | 0                              | 0                  | 0                                 | 1                    | 1                     |
| AT5G15490 | 0                     | 0                              | 0                  | 0                                 | 0                    | 1                     |
| AT5G15520 | 0                     | 0                              | 0                  | 0                                 | 0                    | 1                     |
| AT5G15530 | 1                     | 1                              | 0                  | 0                                 | 0                    | 0                     |
| AT5G15550 | 1                     | 0                              | 0                  | 0                                 | 1                    | 0                     |
| AT5G15610 | 0                     | 0                              | 0                  | 0                                 | 1                    | 0                     |
| AT5G15640 | 1                     | 0                              | 1                  | 1                                 | 1                    | 0                     |
| AT5G15650 | 1                     | 1                              | 1                  | 1                                 | 1                    | 1                     |
| AT5G15910 | 1                     | 0                              | 1                  | 0                                 | 1                    | 1                     |
| AT5G15940 | 0                     | 1                              | 0                  | 0                                 | 0                    | 0                     |
| AT5G15980 | 1                     | 1                              | 1                  | 0                                 | 1                    | 0                     |
| AT5G16050 | 1                     | 0                              | 1                  | 1                                 | 1                    | 0                     |
| AT5G16130 | 1                     | 0                              | 0                  | 1                                 | 0                    | 0                     |
| AT5G16170 | 0                     | 0                              | 0                  | 0                                 | 0                    | 1                     |
| AT5G16230 | 0                     | 1                              | 0                  | 0                                 | 0                    | 0                     |
| AT5G16290 | 1                     | 0                              | 0                  | 0                                 | 0                    | 0                     |
| AT5G16370 | 0                     | 1                              | 0                  | 0                                 | 0                    | 0                     |
| AT5G16390 | 1                     | 0                              | 0                  | 0                                 | 0                    | 0                     |
| AT5G16440 | 1                     | 0                              | 0                  | 0                                 | 1                    | 0                     |
| AT5G16450 | 0                     | 0                              | 0                  | 0                                 | 1                    | 0                     |
| AT5G16510 | 1                     | 0                              | 1                  | 0                                 | 1                    | 0                     |
| AT5G16550 | 0                     | 0                              | 0                  | 0                                 | 1                    | 0                     |
| AT5G16590 | 1                     | 0                              | 1                  | 1                                 | 1                    | 0                     |
| AT5G16620 | 1                     | 0                              | 0                  | 0                                 | 1                    | 0                     |
| AT5G16660 | 1                     | 0                              | 0                  | 0                                 | 0                    | 0                     |
| AT5G16930 | 1                     | 0                              | 0                  | 0                                 | 0                    | 0                     |
| AT5G17190 | 0                     | 1                              | 0                  | 0                                 | 0                    | 1                     |

**Supplementary Tables pertaining to Figure 1**  
**Supplementary Table S2. The 1,995 proteins of the root cellular proteome**

| <b>Locus</b> | <b>Root Hairs<br/>(COBL9)</b> | <b>Non-Hair<br/>Epidermis<br/>(WER)</b> | <b>Cortex<br/>(CORTEX)</b> | <b>Endodermis<br/>/Quiescent<br/>(SCR)</b> | <b>Vasculature<br/>(WOL)</b> | <b>Columella<br/>(PET111)</b> |
|--------------|-------------------------------|-----------------------------------------|----------------------------|--------------------------------------------|------------------------------|-------------------------------|
| AT5G17310    | 0                             | 1                                       | 1                          | 1                                          | 1                            | 0                             |
| AT5G17530    | 1                             | 1                                       | 0                          | 0                                          | 1                            | 0                             |
| AT5G17630    | 0                             | 0                                       | 0                          | 0                                          | 1                            | 1                             |
| AT5G17710    | 0                             | 1                                       | 0                          | 0                                          | 1                            | 0                             |
| AT5G17770    | 1                             | 1                                       | 1                          | 1                                          | 1                            | 1                             |
| AT5G17820    | 1                             | 1                                       | 0                          | 1                                          | 1                            | 0                             |
| AT5G17920    | 1                             | 1                                       | 1                          | 1                                          | 1                            | 1                             |
| AT5G18170    | 1                             | 1                                       | 1                          | 1                                          | 1                            | 1                             |
| AT5G18280    | 1                             | 0                                       | 1                          | 1                                          | 0                            | 0                             |
| AT5G18380    | 0                             | 0                                       | 0                          | 1                                          | 1                            | 1                             |
| AT5G18480    | 1                             | 1                                       | 1                          | 0                                          | 1                            | 1                             |
| AT5G18520    | 0                             | 0                                       | 1                          | 0                                          | 1                            | 1                             |
| AT5G18900    | 1                             | 0                                       | 0                          | 0                                          | 0                            | 0                             |
| AT5G19130    | 0                             | 0                                       | 0                          | 0                                          | 1                            | 0                             |
| AT5G19370    | 1                             | 0                                       | 0                          | 0                                          | 0                            | 0                             |
| AT5G19440    | 1                             | 0                                       | 1                          | 0                                          | 1                            | 0                             |
| AT5G19510    | 1                             | 0                                       | 0                          | 0                                          | 1                            | 0                             |
| AT5G19520    | 0                             | 0                                       | 1                          | 1                                          | 0                            | 1                             |
| AT5G19550    | 1                             | 0                                       | 0                          | 0                                          | 1                            | 0                             |
| AT5G19690    | 1                             | 1                                       | 1                          | 1                                          | 1                            | 1                             |
| AT5G19750    | 0                             | 1                                       | 0                          | 0                                          | 0                            | 0                             |
| AT5G19760    | 1                             | 1                                       | 1                          | 1                                          | 1                            | 1                             |
| AT5G19820    | 1                             | 0                                       | 0                          | 1                                          | 1                            | 0                             |
| AT5G20000    | 0                             | 0                                       | 0                          | 1                                          | 1                            | 0                             |
| AT5G20080    | 1                             | 0                                       | 1                          | 1                                          | 1                            | 1                             |
| AT5G20090    | 0                             | 0                                       | 1                          | 0                                          | 0                            | 1                             |
| AT5G20290    | 1                             | 1                                       | 0                          | 1                                          | 1                            | 0                             |
| AT5G20350    | 1                             | 0                                       | 0                          | 0                                          | 0                            | 0                             |
| AT5G20490    | 1                             | 0                                       | 0                          | 0                                          | 0                            | 0                             |
| AT5G20500    | 1                             | 0                                       | 1                          | 0                                          | 1                            | 1                             |
| AT5G20520    | 1                             | 0                                       | 0                          | 0                                          | 1                            | 0                             |
| AT5G20660    | 1                             | 0                                       | 0                          | 0                                          | 1                            | 1                             |
| AT5G20680    | 1                             | 0                                       | 1                          | 0                                          | 0                            | 0                             |
| AT5G20720    | 1                             | 1                                       | 1                          | 1                                          | 1                            | 1                             |
| AT5G20890    | 0                             | 0                                       | 0                          | 1                                          | 1                            | 0                             |
| AT5G20950    | 0                             | 0                                       | 1                          | 0                                          | 0                            | 0                             |
| AT5G20960    | 0                             | 0                                       | 1                          | 1                                          | 0                            | 1                             |
| AT5G20980    | 1                             | 0                                       | 0                          | 0                                          | 0                            | 0                             |
| AT5G22020    | 0                             | 0                                       | 1                          | 0                                          | 0                            | 0                             |
| AT5G22060    | 0                             | 0                                       | 1                          | 0                                          | 0                            | 0                             |
| AT5G22330    | 1                             | 0                                       | 0                          | 0                                          | 0                            | 0                             |
| AT5G22350    | 1                             | 0                                       | 0                          | 0                                          | 0                            | 0                             |
| AT5G22440    | 1                             | 1                                       | 0                          | 1                                          | 1                            | 0                             |
| AT5G22640    | 1                             | 0                                       | 1                          | 0                                          | 1                            | 0                             |
| AT5G22650    | 1                             | 0                                       | 0                          | 0                                          | 1                            | 0                             |
| AT5G22740    | 1                             | 0                                       | 0                          | 0                                          | 0                            | 0                             |
| AT5G22790    | 0                             | 0                                       | 0                          | 0                                          | 0                            | 1                             |
| AT5G22880    | 1                             | 0                                       | 1                          | 0                                          | 1                            | 1                             |
| AT5G23140    | 0                             | 1                                       | 0                          | 0                                          | 0                            | 1                             |

**Supplementary Tables pertaining to Figure 1**  
**Supplementary Table S2. The 1,995 proteins of the root cellular proteome**

| <b>Locus</b> | <b>Root Hairs<br/>(COBL9)</b> | <b>Non-Hair<br/>Epidermis<br/>(WER)</b> | <b>Cortex<br/>(CORTEX)</b> | <b>Endodermis<br/>/Quiescent<br/>(SCR)</b> | <b>Vasculature<br/>(WOL)</b> | <b>Columella<br/>(PET111)</b> |
|--------------|-------------------------------|-----------------------------------------|----------------------------|--------------------------------------------|------------------------------|-------------------------------|
| AT5G23250    | 1                             | 0                                       | 0                          | 0                                          | 1                            | 0                             |
| AT5G23300    | 1                             | 1                                       | 1                          | 1                                          | 1                            | 1                             |
| AT5G23540    | 1                             | 0                                       | 0                          | 0                                          | 1                            | 0                             |
| AT5G23575    | 1                             | 1                                       | 1                          | 1                                          | 1                            | 1                             |
| AT5G23630    | 1                             | 1                                       | 1                          | 0                                          | 1                            | 1                             |
| AT5G23670    | 1                             | 0                                       | 0                          | 0                                          | 1                            | 0                             |
| AT5G23740    | 1                             | 0                                       | 0                          | 0                                          | 0                            | 0                             |
| AT5G23820    | 1                             | 1                                       | 1                          | 0                                          | 1                            | 1                             |
| AT5G23830    | 1                             | 1                                       | 1                          | 0                                          | 1                            | 1                             |
| AT5G24350    | 0                             | 0                                       | 0                          | 0                                          | 1                            | 0                             |
| AT5G24400    | 1                             | 0                                       | 1                          | 0                                          | 1                            | 0                             |
| AT5G24650    | 1                             | 0                                       | 0                          | 1                                          | 1                            | 0                             |
| AT5G24690    | 0                             | 0                                       | 0                          | 0                                          | 1                            | 0                             |
| AT5G24960    | 0                             | 0                                       | 0                          | 0                                          | 0                            | 1                             |
| AT5G25100    | 1                             | 1                                       | 1                          | 0                                          | 1                            | 1                             |
| AT5G25265    | 1                             | 1                                       | 1                          | 0                                          | 1                            | 0                             |
| AT5G25940    | 1                             | 0                                       | 0                          | 0                                          | 0                            | 0                             |
| AT5G26030    | 1                             | 1                                       | 1                          | 0                                          | 1                            | 0                             |
| AT5G26260    | 1                             | 1                                       | 1                          | 1                                          | 1                            | 1                             |
| AT5G26280    | 1                             | 1                                       | 1                          | 1                                          | 0                            | 1                             |
| AT5G26360    | 0                             | 0                                       | 0                          | 1                                          | 1                            | 0                             |
| AT5G26570    | 0                             | 1                                       | 0                          | 0                                          | 0                            | 1                             |
| AT5G26667    | 1                             | 0                                       | 0                          | 1                                          | 0                            | 0                             |
| AT5G26710    | 1                             | 0                                       | 0                          | 0                                          | 1                            | 0                             |
| AT5G26780    | 1                             | 1                                       | 1                          | 1                                          | 1                            | 0                             |
| AT5G26830    | 1                             | 0                                       | 0                          | 1                                          | 1                            | 0                             |
| AT5G26860    | 1                             | 0                                       | 1                          | 0                                          | 1                            | 0                             |
| AT5G27120    | 1                             | 1                                       | 0                          | 1                                          | 1                            | 0                             |
| AT5G27330    | 0                             | 0                                       | 0                          | 1                                          | 0                            | 0                             |
| AT5G27395    | 1                             | 0                                       | 0                          | 0                                          | 0                            | 0                             |
| AT5G27430    | 1                             | 0                                       | 0                          | 0                                          | 0                            | 0                             |
| AT5G27540    | 1                             | 1                                       | 1                          | 1                                          | 1                            | 1                             |
| AT5G27600    | 0                             | 1                                       | 1                          | 0                                          | 0                            | 0                             |
| AT5G27640    | 0                             | 0                                       | 0                          | 0                                          | 1                            | 0                             |
| AT5G27670    | 0                             | 0                                       | 0                          | 0                                          | 0                            | 1                             |
| AT5G27770    | 0                             | 0                                       | 0                          | 0                                          | 1                            | 0                             |
| AT5G27850    | 1                             | 0                                       | 1                          | 1                                          | 1                            | 1                             |
| AT5G28060    | 0                             | 0                                       | 0                          | 1                                          | 1                            | 0                             |
| AT5G28220    | 1                             | 0                                       | 0                          | 0                                          | 0                            | 0                             |
| AT5G28540    | 1                             | 1                                       | 1                          | 1                                          | 1                            | 1                             |
| AT5G33320    | 1                             | 1                                       | 1                          | 1                                          | 1                            | 1                             |
| AT5G34850    | 1                             | 1                                       | 1                          | 1                                          | 1                            | 1                             |
| AT5G35080    | 0                             | 0                                       | 1                          | 0                                          | 1                            | 0                             |
| AT5G35160    | 1                             | 0                                       | 1                          | 1                                          | 1                            | 1                             |
| AT5G35360    | 1                             | 1                                       | 1                          | 1                                          | 1                            | 1                             |
| AT5G35590    | 1                             | 0                                       | 1                          | 1                                          | 1                            | 0                             |
| AT5G35630    | 1                             | 1                                       | 1                          | 1                                          | 1                            | 1                             |
| AT5G35940    | 1                             | 1                                       | 0                          | 0                                          | 1                            | 1                             |
| AT5G36210    | 1                             | 0                                       | 0                          | 0                                          | 1                            | 0                             |

**Supplementary Tables pertaining to Figure 1**  
**Supplementary Table S2. The 1,995 proteins of the root cellular proteome**

| Locus     | Root Hairs<br>(COBL9) | Non-Hair<br>Epidermis<br>(WER) | Cortex<br>(CORTEX) | Endodermis<br>/Quiescent<br>(SCR) | Vasculature<br>(WOL) | Columella<br>(PET111) |
|-----------|-----------------------|--------------------------------|--------------------|-----------------------------------|----------------------|-----------------------|
| AT5G36230 | 1                     | 0                              | 1                  | 1                                 | 1                    | 0                     |
| AT5G36880 | 1                     | 1                              | 0                  | 0                                 | 1                    | 0                     |
| AT5G37310 | 1                     | 0                              | 0                  | 0                                 | 0                    | 1                     |
| AT5G37510 | 1                     | 1                              | 1                  | 1                                 | 1                    | 1                     |
| AT5G37830 | 0                     | 0                              | 0                  | 0                                 | 1                    | 0                     |
| AT5G38280 | 0                     | 0                              | 0                  | 1                                 | 0                    | 0                     |
| AT5G38460 | 1                     | 0                              | 0                  | 0                                 | 0                    | 0                     |
| AT5G38480 | 1                     | 1                              | 0                  | 1                                 | 1                    | 1                     |
| AT5G38530 | 1                     | 1                              | 1                  | 0                                 | 0                    | 0                     |
| AT5G39320 | 1                     | 0                              | 0                  | 0                                 | 1                    | 0                     |
| AT5G39410 | 1                     | 1                              | 1                  | 0                                 | 0                    | 0                     |
| AT5G39730 | 0                     | 0                              | 0                  | 0                                 | 0                    | 1                     |
| AT5G39740 | 0                     | 0                              | 0                  | 0                                 | 1                    | 0                     |
| AT5G40480 | 1                     | 1                              | 1                  | 1                                 | 1                    | 1                     |
| AT5G40510 | 1                     | 1                              | 0                  | 0                                 | 1                    | 0                     |
| AT5G40580 | 1                     | 0                              | 0                  | 0                                 | 0                    | 0                     |
| AT5G40650 | 1                     | 0                              | 0                  | 0                                 | 1                    | 0                     |
| AT5G40660 | 0                     | 1                              | 0                  | 0                                 | 0                    | 0                     |
| AT5G40770 | 1                     | 1                              | 1                  | 1                                 | 1                    | 1                     |
| AT5G40810 | 1                     | 1                              | 1                  | 1                                 | 1                    | 1                     |
| AT5G40890 | 1                     | 1                              | 1                  | 0                                 | 1                    | 1                     |
| AT5G40930 | 1                     | 0                              | 0                  | 0                                 | 1                    | 0                     |
| AT5G41210 | 1                     | 0                              | 0                  | 0                                 | 0                    | 1                     |
| AT5G41520 | 1                     | 0                              | 0                  | 1                                 | 1                    | 0                     |
| AT5G41600 | 1                     | 1                              | 1                  | 0                                 | 0                    | 1                     |
| AT5G41670 | 1                     | 1                              | 1                  | 1                                 | 1                    | 1                     |
| AT5G41970 | 0                     | 0                              | 1                  | 1                                 | 1                    | 0                     |
| AT5G42020 | 1                     | 1                              | 1                  | 1                                 | 1                    | 1                     |
| AT5G42080 | 1                     | 1                              | 1                  | 1                                 | 1                    | 1                     |
| AT5G42090 | 1                     | 0                              | 1                  | 0                                 | 1                    | 1                     |
| AT5G42150 | 1                     | 1                              | 1                  | 0                                 | 1                    | 1                     |
| AT5G42390 | 0                     | 1                              | 0                  | 0                                 | 0                    | 0                     |
| AT5G42420 | 0                     | 0                              | 0                  | 0                                 | 0                    | 1                     |
| AT5G42570 | 1                     | 0                              | 1                  | 1                                 | 1                    | 1                     |
| AT5G42590 | 0                     | 1                              | 1                  | 0                                 | 0                    | 1                     |
| AT5G42650 | 1                     | 1                              | 0                  | 0                                 | 0                    | 0                     |
| AT5G42740 | 0                     | 0                              | 0                  | 1                                 | 1                    | 0                     |
| AT5G42790 | 1                     | 0                              | 0                  | 1                                 | 1                    | 1                     |
| AT5G42960 | 1                     | 1                              | 1                  | 1                                 | 1                    | 1                     |
| AT5G42980 | 1                     | 1                              | 1                  | 0                                 | 1                    | 1                     |
| AT5G43010 | 0                     | 0                              | 0                  | 0                                 | 1                    | 0                     |
| AT5G43060 | 1                     | 1                              | 1                  | 1                                 | 1                    | 1                     |
| AT5G43430 | 1                     | 0                              | 0                  | 0                                 | 0                    | 0                     |
| AT5G43600 | 0                     | 0                              | 1                  | 0                                 | 0                    | 0                     |
| AT5G43780 | 0                     | 0                              | 1                  | 0                                 | 0                    | 0                     |
| AT5G43830 | 1                     | 0                              | 0                  | 0                                 | 0                    | 0                     |
| AT5G43940 | 1                     | 0                              | 1                  | 0                                 | 1                    | 0                     |
| AT5G43970 | 1                     | 0                              | 1                  | 0                                 | 0                    | 1                     |
| AT5G44020 | 1                     | 1                              | 1                  | 0                                 | 1                    | 1                     |

**Supplementary Tables pertaining to Figure 1**  
**Supplementary Table S2. The 1,995 proteins of the root cellular proteome**

| Locus     | Root Hairs<br>(COBL9) | Non-Hair<br>Epidermis<br>(WER) | Cortex<br>(CORTEX) | Endodermis<br>/Quiescent<br>(SCR) | Vasculature<br>(WOL) | Columella<br>(PET111) |
|-----------|-----------------------|--------------------------------|--------------------|-----------------------------------|----------------------|-----------------------|
| AT5G44120 | 0                     | 1                              | 0                  | 0                                 | 1                    | 0                     |
| AT5G44240 | 0                     | 0                              | 1                  | 0                                 | 0                    | 0                     |
| AT5G44320 | 0                     | 1                              | 0                  | 0                                 | 1                    | 0                     |
| AT5G44510 | 0                     | 0                              | 0                  | 0                                 | 1                    | 0                     |
| AT5G44710 | 1                     | 0                              | 0                  | 0                                 | 0                    | 0                     |
| AT5G44820 | 1                     | 0                              | 0                  | 0                                 | 0                    | 0                     |
| AT5G45390 | 0                     | 1                              | 0                  | 0                                 | 0                    | 0                     |
| AT5G45620 | 1                     | 0                              | 0                  | 0                                 | 1                    | 0                     |
| AT5G45750 | 1                     | 0                              | 0                  | 0                                 | 1                    | 1                     |
| AT5G46160 | 1                     | 0                              | 0                  | 0                                 | 0                    | 0                     |
| AT5G46180 | 0                     | 0                              | 0                  | 0                                 | 0                    | 1                     |
| AT5G46290 | 1                     | 1                              | 1                  | 1                                 | 1                    | 1                     |
| AT5G46430 | 0                     | 0                              | 0                  | 0                                 | 1                    | 0                     |
| AT5G46700 | 0                     | 0                              | 0                  | 1                                 | 0                    | 0                     |
| AT5G46800 | 1                     | 1                              | 1                  | 1                                 | 0                    | 0                     |
| AT5G47010 | 0                     | 0                              | 0                  | 1                                 | 0                    | 0                     |
| AT5G47030 | 1                     | 1                              | 0                  | 1                                 | 1                    | 1                     |
| AT5G47040 | 1                     | 0                              | 0                  | 0                                 | 0                    | 0                     |
| AT5G47320 | 1                     | 0                              | 0                  | 0                                 | 1                    | 0                     |
| AT5G47420 | 1                     | 0                              | 0                  | 0                                 | 0                    | 0                     |
| AT5G47690 | 0                     | 0                              | 0                  | 0                                 | 1                    | 0                     |
| AT5G47770 | 1                     | 0                              | 1                  | 1                                 | 1                    | 0                     |
| AT5G47780 | 1                     | 0                              | 0                  | 0                                 | 0                    | 0                     |
| AT5G47890 | 1                     | 0                              | 0                  | 1                                 | 1                    | 1                     |
| AT5G47990 | 1                     | 1                              | 1                  | 0                                 | 1                    | 1                     |
| AT5G48000 | 1                     | 1                              | 1                  | 0                                 | 1                    | 1                     |
| AT5G48010 | 1                     | 1                              | 1                  | 0                                 | 1                    | 0                     |
| AT5G48030 | 0                     | 0                              | 0                  | 1                                 | 1                    | 0                     |
| AT5G48180 | 1                     | 0                              | 0                  | 0                                 | 0                    | 0                     |
| AT5G48230 | 1                     | 0                              | 1                  | 1                                 | 1                    | 0                     |
| AT5G48300 | 0                     | 0                              | 1                  | 0                                 | 0                    | 1                     |
| AT5G48480 | 0                     | 0                              | 0                  | 0                                 | 1                    | 0                     |
| AT5G48580 | 1                     | 1                              | 1                  | 0                                 | 1                    | 0                     |
| AT5G48760 | 0                     | 0                              | 0                  | 1                                 | 0                    | 0                     |
| AT5G48810 | 1                     | 1                              | 1                  | 0                                 | 1                    | 1                     |
| AT5G48880 | 0                     | 0                              | 1                  | 0                                 | 0                    | 0                     |
| AT5G49030 | 0                     | 1                              | 0                  | 0                                 | 0                    | 0                     |
| AT5G49270 | 1                     | 0                              | 0                  | 0                                 | 0                    | 0                     |
| AT5G49460 | 0                     | 1                              | 0                  | 1                                 | 1                    | 1                     |
| AT5G49555 | 0                     | 1                              | 0                  | 0                                 | 0                    | 0                     |
| AT5G49680 | 1                     | 0                              | 0                  | 0                                 | 0                    | 0                     |
| AT5G49720 | 1                     | 0                              | 1                  | 0                                 | 1                    | 0                     |
| AT5G49810 | 1                     | 0                              | 0                  | 0                                 | 1                    | 0                     |
| AT5G49910 | 0                     | 0                              | 0                  | 1                                 | 1                    | 0                     |
| AT5G50370 | 1                     | 0                              | 1                  | 1                                 | 1                    | 1                     |
| AT5G50375 | 0                     | 0                              | 1                  | 1                                 | 0                    | 0                     |
| AT5G50850 | 1                     | 1                              | 1                  | 1                                 | 1                    | 1                     |
| AT5G50920 | 1                     | 1                              | 1                  | 0                                 | 1                    | 1                     |
| AT5G51200 | 1                     | 0                              | 0                  | 0                                 | 1                    | 0                     |

**Supplementary Tables pertaining to Figure 1**  
**Supplementary Table S2. The 1,995 proteins of the root cellular proteome**

| <b>Locus</b> | <b>Root Hairs<br/>(COBL9)</b> | <b>Non-Hair<br/>Epidermis<br/>(WER)</b> | <b>Cortex<br/>(CORTEX)</b> | <b>Endodermis<br/>/Quiescent<br/>(SCR)</b> | <b>Vasculature<br/>(WOL)</b> | <b>Columella<br/>(PET111)</b> |
|--------------|-------------------------------|-----------------------------------------|----------------------------|--------------------------------------------|------------------------------|-------------------------------|
| AT5G51220    | 1                             | 1                                       | 1                          | 1                                          | 1                            | 1                             |
| AT5G51570    | 1                             | 0                                       | 1                          | 0                                          | 0                            | 0                             |
| AT5G51820    | 0                             | 0                                       | 0                          | 0                                          | 1                            | 0                             |
| AT5G52210    | 1                             | 0                                       | 0                          | 0                                          | 0                            | 0                             |
| AT5G52240    | 1                             | 1                                       | 0                          | 0                                          | 1                            | 1                             |
| AT5G52520    | 0                             | 1                                       | 0                          | 0                                          | 0                            | 0                             |
| AT5G52840    | 1                             | 1                                       | 1                          | 1                                          | 1                            | 1                             |
| AT5G52920    | 1                             | 1                                       | 1                          | 1                                          | 1                            | 0                             |
| AT5G53070    | 1                             | 1                                       | 1                          | 0                                          | 0                            | 0                             |
| AT5G53090    | 1                             | 0                                       | 0                          | 0                                          | 1                            | 0                             |
| AT5G53340    | 1                             | 0                                       | 0                          | 0                                          | 0                            | 0                             |
| AT5G53400    | 0                             | 0                                       | 0                          | 0                                          | 1                            | 0                             |
| AT5G53460    | 1                             | 1                                       | 1                          | 1                                          | 1                            | 1                             |
| AT5G53480    | 1                             | 0                                       | 1                          | 1                                          | 1                            | 0                             |
| AT5G53560    | 1                             | 1                                       | 1                          | 1                                          | 1                            | 1                             |
| AT5G53850    | 1                             | 0                                       | 0                          | 0                                          | 1                            | 0                             |
| AT5G54100    | 1                             | 1                                       | 0                          | 1                                          | 1                            | 1                             |
| AT5G54370    | 1                             | 1                                       | 0                          | 0                                          | 0                            | 1                             |
| AT5G54500    | 1                             | 0                                       | 0                          | 0                                          | 0                            | 0                             |
| AT5G54750    | 1                             | 0                                       | 0                          | 0                                          | 1                            | 0                             |
| AT5G54800    | 1                             | 0                                       | 1                          | 0                                          | 1                            | 1                             |
| AT5G54810    | 0                             | 1                                       | 0                          | 0                                          | 0                            | 0                             |
| AT5G54830    | 0                             | 1                                       | 0                          | 0                                          | 0                            | 0                             |
| AT5G55070    | 1                             | 1                                       | 1                          | 1                                          | 1                            | 1                             |
| AT5G55200    | 1                             | 0                                       | 0                          | 0                                          | 0                            | 0                             |
| AT5G55610    | 1                             | 1                                       | 1                          | 0                                          | 1                            | 1                             |
| AT5G55940    | 1                             | 1                                       | 1                          | 1                                          | 1                            | 1                             |
| AT5G56010    | 0                             | 0                                       | 0                          | 0                                          | 1                            | 0                             |
| AT5G56030    | 1                             | 0                                       | 0                          | 1                                          | 1                            | 0                             |
| AT5G56350    | 1                             | 0                                       | 0                          | 0                                          | 0                            | 0                             |
| AT5G56360    | 1                             | 1                                       | 1                          | 1                                          | 1                            | 1                             |
| AT5G56500    | 1                             | 1                                       | 1                          | 1                                          | 1                            | 1                             |
| AT5G56680    | 0                             | 0                                       | 0                          | 0                                          | 1                            | 0                             |
| AT5G56730    | 1                             | 0                                       | 0                          | 0                                          | 0                            | 0                             |
| AT5G56940    | 1                             | 0                                       | 1                          | 0                                          | 1                            | 0                             |
| AT5G57020    | 0                             | 0                                       | 0                          | 0                                          | 1                            | 0                             |
| AT5G57110    | 1                             | 0                                       | 0                          | 0                                          | 1                            | 1                             |
| AT5G57290    | 0                             | 0                                       | 0                          | 0                                          | 1                            | 0                             |
| AT5G57490    | 0                             | 1                                       | 1                          | 1                                          | 1                            | 1                             |
| AT5G57500    | 0                             | 1                                       | 0                          | 0                                          | 0                            | 1                             |
| AT5G57655    | 1                             | 1                                       | 1                          | 0                                          | 0                            | 1                             |
| AT5G57870    | 1                             | 0                                       | 0                          | 1                                          | 1                            | 0                             |
| AT5G58030    | 0                             | 0                                       | 0                          | 1                                          | 1                            | 0                             |
| AT5G58070    | 0                             | 0                                       | 0                          | 0                                          | 0                            | 1                             |
| AT5G58100    | 1                             | 0                                       | 1                          | 0                                          | 1                            | 0                             |
| AT5G58270    | 1                             | 0                                       | 0                          | 0                                          | 0                            | 0                             |
| AT5G58710    | 1                             | 1                                       | 0                          | 0                                          | 1                            | 1                             |
| AT5G58784    | 1                             | 0                                       | 0                          | 0                                          | 0                            | 0                             |
| AT5G59010    | 0                             | 0                                       | 0                          | 0                                          | 1                            | 0                             |



**Supplementary Tables pertaining to Figure 1**

**Supplementary Table S2. The 1,995 proteins of the root cellular proteome**

| <b>Locus</b> | <b>Root Hairs<br/>(COBL9)</b> | <b>Non-Hair<br/>Epidermis<br/>(WER)</b> | <b>Cortex<br/>(CORTEX)</b> | <b>Endodermis<br/>/Quiescent<br/>(SCR)</b> | <b>Vasculature<br/>(WOL)</b> | <b>Columella<br/>(PET111)</b> |
|--------------|-------------------------------|-----------------------------------------|----------------------------|--------------------------------------------|------------------------------|-------------------------------|
| AT5G59290    | 0                             | 1                                       | 0                          | 0                                          | 0                            | 1                             |
| AT5G59870    | 1                             | 0                                       | 1                          | 1                                          | 0                            | 1                             |
| AT5G59880    | 1                             | 0                                       | 1                          | 0                                          | 0                            | 1                             |
| AT5G59910    | 1                             | 0                                       | 0                          | 0                                          | 0                            | 0                             |
| AT5G59980    | 0                             | 0                                       | 1                          | 0                                          | 0                            | 0                             |
| AT5G60040    | 0                             | 0                                       | 0                          | 0                                          | 1                            | 0                             |
| AT5G60120    | 0                             | 0                                       | 1                          | 0                                          | 0                            | 0                             |
| AT5G60160    | 1                             | 1                                       | 1                          | 1                                          | 1                            | 0                             |
| AT5G60640    | 1                             | 1                                       | 1                          | 1                                          | 1                            | 1                             |
| AT5G60660    | 1                             | 0                                       | 1                          | 0                                          | 1                            | 1                             |
| AT5G60670    | 0                             | 0                                       | 0                          | 1                                          | 0                            | 0                             |
| AT5G60700    | 1                             | 1                                       | 0                          | 0                                          | 0                            | 1                             |
| AT5G60730    | 1                             | 0                                       | 0                          | 0                                          | 0                            | 0                             |
| AT5G60920    | 0                             | 0                                       | 1                          | 0                                          | 1                            | 0                             |
| AT5G60960    | 1                             | 0                                       | 0                          | 0                                          | 1                            | 0                             |
| AT5G60980    | 1                             | 0                                       | 0                          | 0                                          | 1                            | 0                             |
| AT5G61020    | 0                             | 0                                       | 0                          | 0                                          | 1                            | 0                             |
| AT5G61030    | 1                             | 0                                       | 0                          | 0                                          | 1                            | 0                             |
| AT5G61140    | 0                             | 0                                       | 0                          | 0                                          | 1                            | 0                             |
| AT5G61170    | 0                             | 0                                       | 0                          | 0                                          | 1                            | 0                             |
| AT5G61240    | 1                             | 1                                       | 1                          | 0                                          | 1                            | 1                             |
| AT5G61580    | 1                             | 0                                       | 0                          | 0                                          | 0                            | 0                             |
| AT5G61780    | 0                             | 0                                       | 0                          | 1                                          | 1                            | 0                             |
| AT5G61790    | 1                             | 1                                       | 1                          | 1                                          | 1                            | 1                             |
| AT5G61840    | 0                             | 0                                       | 1                          | 0                                          | 0                            | 0                             |
| AT5G62190    | 0                             | 0                                       | 0                          | 0                                          | 1                            | 0                             |
| AT5G62200    | 0                             | 0                                       | 0                          | 0                                          | 0                            | 1                             |
| AT5G62270    | 1                             | 0                                       | 0                          | 0                                          | 0                            | 0                             |
| AT5G62390    | 1                             | 0                                       | 0                          | 1                                          | 1                            | 1                             |
| AT5G62530    | 1                             | 1                                       | 1                          | 1                                          | 1                            | 1                             |
| AT5G62670    | 0                             | 0                                       | 0                          | 0                                          | 1                            | 0                             |
| AT5G62740    | 0                             | 0                                       | 0                          | 0                                          | 0                            | 1                             |
| AT5G62890    | 0                             | 1                                       | 0                          | 0                                          | 1                            | 0                             |
| AT5G63310    | 0                             | 0                                       | 1                          | 0                                          | 0                            | 0                             |
| AT5G63400    | 1                             | 1                                       | 1                          | 1                                          | 1                            | 1                             |
| AT5G63510    | 1                             | 1                                       | 0                          | 0                                          | 1                            | 0                             |
| AT5G63570    | 1                             | 1                                       | 0                          | 1                                          | 1                            | 0                             |
| AT5G63620    | 0                             | 1                                       | 0                          | 0                                          | 0                            | 0                             |
| AT5G63840    | 1                             | 1                                       | 1                          | 1                                          | 1                            | 1                             |
| AT5G63890    | 1                             | 0                                       | 1                          | 1                                          | 1                            | 0                             |
| AT5G64030    | 1                             | 1                                       | 1                          | 0                                          | 1                            | 1                             |
| AT5G64050    | 1                             | 1                                       | 0                          | 0                                          | 0                            | 0                             |
| AT5G64100    | 1                             | 0                                       | 1                          | 0                                          | 0                            | 0                             |
| AT5G64270    | 0                             | 0                                       | 0                          | 0                                          | 1                            | 0                             |
| AT5G64290    | 1                             | 0                                       | 1                          | 1                                          | 1                            | 0                             |
| AT5G64300    | 1                             | 1                                       | 0                          | 0                                          | 0                            | 0                             |
| AT5G64350    | 0                             | 0                                       | 0                          | 0                                          | 0                            | 1                             |
| AT5G64440    | 1                             | 1                                       | 1                          | 1                                          | 0                            | 1                             |
| AT5G64670    | 1                             | 0                                       | 0                          | 0                                          | 0                            | 0                             |

**Supplementary Tables pertaining to Figure 1**  
**Supplementary Table S2. The 1,995 proteins of the root cellular proteome**

| Locus                      | Root Hairs<br>(COBL9) | Non-Hair<br>Epidermis<br>(WER) | Cortex<br>(CORTEX) | Endodermis<br>/Quiescent<br>(SCR) | Vasculature<br>(WOL) | Columella<br>(PET111) |
|----------------------------|-----------------------|--------------------------------|--------------------|-----------------------------------|----------------------|-----------------------|
| AT5G64740                  | 1                     | 0                              | 0                  | 0                                 | 1                    | 0                     |
| AT5G64860                  | 1                     | 0                              | 0                  | 0                                 | 0                    | 1                     |
| AT5G65020                  | 1                     | 1                              | 1                  | 1                                 | 1                    | 1                     |
| AT5G65110                  | 1                     | 1                              | 0                  | 0                                 | 0                    | 1                     |
| AT5G65270                  | 0                     | 0                              | 0                  | 0                                 | 1                    | 0                     |
| AT5G65430                  | 1                     | 0                              | 0                  | 1                                 | 1                    | 0                     |
| AT5G65620                  | 1                     | 0                              | 0                  | 0                                 | 1                    | 0                     |
| AT5G65700                  | 0                     | 0                              | 0                  | 0                                 | 1                    | 0                     |
| AT5G65720                  | 1                     | 1                              | 0                  | 0                                 | 1                    | 0                     |
| AT5G65750                  | 1                     | 1                              | 0                  | 0                                 | 0                    | 1                     |
| AT5G65780                  | 1                     | 1                              | 0                  | 0                                 | 1                    | 0                     |
| AT5G65810                  | 1                     | 1                              | 1                  | 0                                 | 1                    | 1                     |
| AT5G65940                  | 1                     | 0                              | 0                  | 0                                 | 1                    | 1                     |
| AT5G66060                  | 1                     | 0                              | 0                  | 0                                 | 0                    | 0                     |
| AT5G66120                  | 1                     | 0                              | 1                  | 1                                 | 1                    | 0                     |
| AT5G66140                  | 1                     | 0                              | 0                  | 1                                 | 1                    | 1                     |
| AT5G66280                  | 0                     | 0                              | 0                  | 0                                 | 0                    | 1                     |
| AT5G66510                  | 1                     | 1                              | 1                  | 1                                 | 1                    | 1                     |
| AT5G66530                  | 1                     | 0                              | 1                  | 0                                 | 0                    | 0                     |
| AT5G66680                  | 1                     | 1                              | 1                  | 1                                 | 1                    | 1                     |
| AT5G66760                  | 1                     | 1                              | 1                  | 1                                 | 1                    | 1                     |
| AT5G66860                  | 1                     | 1                              | 1                  | 1                                 | 1                    | 1                     |
| AT5G67500                  | 1                     | 1                              | 1                  | 1                                 | 1                    | 1                     |
| AT5G67590                  | 1                     | 0                              | 1                  | 1                                 | 1                    | 1                     |
| ATCG00120                  | 0                     | 1                              | 1                  | 0                                 | 1                    | 0                     |
| ATCG00480                  | 1                     | 1                              | 1                  | 1                                 | 1                    | 0                     |
| ATCG00490                  | 0                     | 0                              | 1                  | 0                                 | 0                    | 0                     |
| ATCG00500                  | 1                     | 1                              | 1                  | 1                                 | 1                    | 0                     |
| ATCG01130                  | 1                     | 0                              | 1                  | 1                                 | 1                    | 0                     |
| ATMG00070                  | 1                     | 1                              | 1                  | 1                                 | 1                    | 1                     |
| ATMG00160                  | 1                     | 0                              | 1                  | 0                                 | 1                    | 0                     |
| ATMG00510                  | 1                     | 1                              | 1                  | 1                                 | 1                    | 1                     |
| ATMG00560                  | 1                     | 0                              | 0                  | 0                                 | 0                    | 0                     |
| ATMG00580                  | 1                     | 0                              | 0                  | 0                                 | 1                    | 0                     |
| ATMG00640                  | 1                     | 1                              | 1                  | 1                                 | 1                    | 1                     |
| False Discovery Rate (FDR) | 0.0320233             |                                |                    |                                   |                      |                       |
| REV_AT1G06230              | 0                     | 1                              | 0                  | 0                                 | 0                    | 0                     |
| REV_AT1G07630              | 1                     | 0                              | 0                  | 0                                 | 0                    | 0                     |
| REV_AT1G08590              | 1                     | 0                              | 0                  | 0                                 | 0                    | 0                     |
| REV_AT1G09020              | 0                     | 1                              | 0                  | 1                                 | 0                    | 0                     |
| REV_AT1G13490              | 0                     | 0                              | 0                  | 1                                 | 0                    | 0                     |
| REV_AT1G26640              | 0                     | 0                              | 1                  | 0                                 | 0                    | 0                     |
| REV_AT1G31730              | 1                     | 0                              | 0                  | 0                                 | 0                    | 0                     |
| REV_AT1G34930              | 1                     | 0                              | 0                  | 0                                 | 0                    | 0                     |
| REV_AT1G36180              | 0                     | 0                              | 0                  | 0                                 | 1                    | 0                     |
| REV_AT1G50380              | 0                     | 0                              | 0                  | 0                                 | 1                    | 0                     |
| REV_AT1G55040              | 1                     | 0                              | 0                  | 0                                 | 0                    | 0                     |
| REV_AT1G59790              | 1                     | 0                              | 0                  | 0                                 | 0                    | 0                     |

**Supplementary Tables pertaining to Figure 1**  
**Supplementary Table S2. The 1,995 proteins of the root cellular proteome**

| Locus         | Root Hairs<br>(COBL9) | Non-Hair<br>Epidermis<br>(WER) | Cortex<br>(CORTEX) | Endodermis<br>/Quiescent<br>(SCR) | Vasculature<br>(WOL) | Columella<br>(PET111) |
|---------------|-----------------------|--------------------------------|--------------------|-----------------------------------|----------------------|-----------------------|
| REV_AT1G67110 | 1                     | 0                              | 0                  | 0                                 | 0                    | 0                     |
| REV_AT1G80760 | 0                     | 1                              | 0                  | 0                                 | 0                    | 0                     |
| REV_AT2G03450 | 1                     | 0                              | 0                  | 0                                 | 0                    | 0                     |
| REV_AT2G17880 | 1                     | 0                              | 0                  | 0                                 | 0                    | 0                     |
| REV_AT2G20330 | 0                     | 0                              | 1                  | 0                                 | 0                    | 0                     |
| REV_AT2G27120 | 1                     | 0                              | 0                  | 0                                 | 0                    | 0                     |
| REV_AT2G31830 | 0                     | 0                              | 0                  | 0                                 | 1                    | 0                     |
| REV_AT2G32750 | 0                     | 0                              | 1                  | 0                                 | 0                    | 0                     |
| REV_AT2G33050 | 1                     | 1                              | 1                  | 0                                 | 1                    | 0                     |
| REV_AT2G37670 | 0                     | 0                              | 0                  | 0                                 | 0                    | 1                     |
| REV_AT3G06490 | 1                     | 0                              | 0                  | 0                                 | 0                    | 0                     |
| REV_AT3G06860 | 0                     | 0                              | 0                  | 0                                 | 1                    | 0                     |
| REV_AT3G12950 | 0                     | 0                              | 0                  | 0                                 | 1                    | 0                     |
| REV_AT3G13180 | 0                     | 0                              | 1                  | 0                                 | 0                    | 0                     |
| REV_AT3G14670 | 1                     | 0                              | 0                  | 0                                 | 1                    | 0                     |
| REV_AT3G15120 | 1                     | 0                              | 1                  | 0                                 | 1                    | 0                     |
| REV_AT3G18110 | 1                     | 0                              | 0                  | 0                                 | 0                    | 0                     |
| REV_AT3G18310 | 1                     | 0                              | 0                  | 0                                 | 1                    | 0                     |
| REV_AT3G19040 | 0                     | 0                              | 0                  | 0                                 | 1                    | 0                     |
| REV_AT3G22790 | 0                     | 0                              | 0                  | 0                                 | 1                    | 0                     |
| REV_AT3G28840 | 1                     | 0                              | 1                  | 0                                 | 1                    | 0                     |
| REV_AT3G29300 | 0                     | 0                              | 0                  | 1                                 | 0                    | 0                     |
| REV_AT3G50870 | 0                     | 0                              | 1                  | 0                                 | 0                    | 0                     |
| REV_AT3G54760 | 0                     | 0                              | 1                  | 0                                 | 0                    | 0                     |
| REV_AT3G57350 | 0                     | 0                              | 0                  | 0                                 | 0                    | 1                     |
| REV_AT4G00440 | 0                     | 0                              | 0                  | 0                                 | 1                    | 0                     |
| REV_AT4G01200 | 0                     | 1                              | 0                  | 0                                 | 0                    | 0                     |
| REV_AT4G10120 | 0                     | 0                              | 1                  | 0                                 | 0                    | 0                     |
| REV_AT4G10710 | 0                     | 0                              | 1                  | 0                                 | 1                    | 0                     |
| REV_AT4G11660 | 0                     | 0                              | 0                  | 0                                 | 1                    | 0                     |
| REV_AT4G14370 | 0                     | 0                              | 0                  | 0                                 | 1                    | 0                     |
| REV_AT4G14850 | 1                     | 0                              | 0                  | 0                                 | 0                    | 0                     |
| REV_AT4G18820 | 1                     | 0                              | 0                  | 0                                 | 0                    | 0                     |
| REV_AT4G20650 | 1                     | 0                              | 0                  | 0                                 | 0                    | 0                     |
| REV_AT4G21860 | 0                     | 0                              | 1                  | 0                                 | 0                    | 0                     |
| REV_AT4G24900 | 1                     | 0                              | 0                  | 0                                 | 0                    | 0                     |
| REV_AT4G25820 | 0                     | 0                              | 1                  | 0                                 | 0                    | 0                     |
| REV_AT4G26640 | 1                     | 0                              | 0                  | 0                                 | 0                    | 0                     |
| REV_AT4G32430 | 0                     | 0                              | 1                  | 0                                 | 0                    | 0                     |
| REV_AT4G32850 | 0                     | 0                              | 0                  | 0                                 | 1                    | 0                     |
| REV_AT4G36490 | 0                     | 0                              | 1                  | 0                                 | 0                    | 0                     |
| REV_AT5G07210 | 0                     | 0                              | 0                  | 0                                 | 1                    | 0                     |
| REV_AT5G07390 | 1                     | 0                              | 0                  | 0                                 | 0                    | 0                     |
| REV_AT5G12300 | 0                     | 0                              | 0                  | 0                                 | 1                    | 0                     |
| REV_AT5G15700 | 0                     | 0                              | 1                  | 0                                 | 0                    | 0                     |
| REV_AT5G16420 | 0                     | 0                              | 1                  | 0                                 | 0                    | 0                     |
| REV_AT5G21120 | 1                     | 0                              | 0                  | 0                                 | 0                    | 0                     |
| REV_AT5G22220 | 0                     | 1                              | 0                  | 0                                 | 0                    | 0                     |
| REV_AT5G24740 | 0                     | 0                              | 0                  | 0                                 | 1                    | 0                     |

**Supplementary Tables pertaining to Figure 1****Supplementary Table S2. The 1,995 proteins of the root cellular proteome**

| <b>Locus</b>  | <b>Root Hairs<br/>(COBL9)</b> | <b>Non-Hair<br/>Epidermis<br/>(WER)</b> | <b>Cortex<br/>(CORTEX)</b> | <b>Endodermis<br/>/Quiescent<br/>(SCR)</b> | <b>Vasculature<br/>(WOL)</b> | <b>Columella<br/>(PET111)</b> |
|---------------|-------------------------------|-----------------------------------------|----------------------------|--------------------------------------------|------------------------------|-------------------------------|
| REV_AT5G44750 | 0                             | 0                                       | 0                          | 0                                          | 0                            | 1                             |
| REV_AT5G44790 | 0                             | 0                                       | 1                          | 0                                          | 0                            | 0                             |
| REV_AT5G45370 | 0                             | 0                                       | 1                          | 0                                          | 0                            | 0                             |
| REV_AT5G48780 | 0                             | 0                                       | 0                          | 0                                          | 1                            | 0                             |
| REV_AT5G61190 | 0                             | 0                                       | 0                          | 0                                          | 1                            | 0                             |

**Supplementary Tables pertaining to Figure 1**  
**Supplementary Table S3. Root proteins found in a single cell population**

| <b>Root Hairs<br/>(COBL9)</b> | <b>Non-Hair<br/>Epidermis<br/>(WER)</b> | <b>Cortex<br/>(CORTEX)</b> | <b>Endodermis<br/>/Quiescent<br/>(SCR)</b> | <b>Vasculature<br/>(WOL)</b> | <b>Columella<br/>(PET111)</b> |
|-------------------------------|-----------------------------------------|----------------------------|--------------------------------------------|------------------------------|-------------------------------|
| AT1G01910                     | AT1G01950                               | AT1G01960                  | AT1G01100                                  | AT1G01040                    | AT1G01180                     |
| AT1G04810                     | AT1G03230                               | AT1G02420                  | AT1G05260                                  | AT1G03880                    | AT1G20450                     |
| AT1G05620                     | AT1G07410                               | AT1G06430                  | AT1G07790                                  | AT1G04690                    | AT1G20630                     |
| AT1G06890                     | AT1G10510                               | AT1G06800                  | AT1G10670                                  | AT1G04850                    | AT1G23310                     |
| AT1G08450                     | AT1G20300                               | AT1G16560                  | AT1G14290                                  | AT1G06000                    | AT1G24090                     |
| AT1G14060                     | AT1G24280                               | AT1G20620                  | AT1G14320                                  | AT1G07750                    | AT1G28130                     |
| AT1G14210                     | AT1G28440                               | AT1G27980                  | AT1G32400                                  | AT1G08640                    | AT1G28510                     |
| AT1G14710                     | AT1G29330                               | AT1G29020                  | AT1G41880                                  | AT1G08840                    | AT1G31812                     |
| AT1G15710                     | AT1G31950                               | AT1G36050                  | AT1G48200                                  | AT1G12310                    | AT1G32900                     |
| AT1G16300                     | AT1G49630                               | AT1G47128                  | AT1G48600                                  | AT1G13560                    | AT1G33230                     |
| AT1G17160                     | AT1G50940                               | AT1G50700                  | AT1G63050                                  | AT1G15750                    | AT1G47600                     |
| AT1G17890                     | AT1G67560                               | AT1G54550                  | AT1G66670                                  | AT1G16350                    | AT1G49300                     |
| AT1G19130                     | AT1G70190                               | AT1G59780                  | AT1G73230                                  | AT1G16890                    | AT1G51650                     |
| AT1G19140                     | AT1G71260                               | AT1G62130                  | AT1G75220                                  | AT1G19440                    | AT1G52280                     |
| AT1G20230                     | AT1G80480                               | AT1G67500                  | AT1G76550                                  | AT1G19800                    | AT1G64850                     |
| AT1G20560                     | AT2G23370                               | AT1G70570                  | AT1G78860                                  | AT1G19900                    | AT1G65260                     |
| AT1G21370                     | AT2G26240                               | AT1G72730                  | AT1G79210                                  | AT1G19920                    | AT1G65820                     |
| AT1G21560                     | AT2G43350                               | AT1G72860                  | AT2G29550                                  | AT1G20090                    | AT1G67850                     |
| AT1G23170                     | AT2G45440                               | AT1G73940                  | AT2G34040                                  | AT1G20950                    | AT1G69526                     |
| AT1G25380                     | AT3G07330                               | AT1G75140                  | AT2G40600                                  | AT1G21160                    | AT1G69830                     |
| AT1G26160                     | AT3G13110                               | AT2G04780                  | AT3G02080                                  | AT1G21690                    | AT1G70940                     |
| AT1G29250                     | AT3G13530                               | AT2G20680                  | AT3G04520                                  | AT1G22200                    | AT1G72175                     |
| AT1G30450                     | AT3G14790                               | AT2G25160                  | AT3G11250                                  | AT1G22460                    | AT1G76030                     |
| AT1G30870                     | AT3G18830                               | AT2G39800                  | AT3G17820                                  | AT1G27310                    | AT1G76200                     |
| AT1G31860                     | AT3G21160                               | AT2G40890                  | AT3G19450                                  | AT1G27970                    | AT2G03120                     |
| AT1G48230                     | AT3G44160                               | AT2G41150                  | AT3G19760                                  | AT1G30690                    | AT2G04350                     |
| AT1G48610                     | AT3G47670                               | AT2G48020                  | AT3G22230                                  | AT1G31730                    | AT2G18230                     |
| AT1G48900                     | AT3G49190                               | AT3G05100                  | AT3G25290                                  | AT1G33040                    | AT2G19760                     |
| AT1G49140                     | AT3G53430                               | AT3G07290                  | AT3G32980                                  | AT1G33680                    | AT2G21590                     |
| AT1G50140                     | AT3G53460                               | AT3G09410                  | AT3G51240                                  | AT1G33810                    | AT2G22420                     |
| AT1G50500                     | AT3G54640                               | AT3G10730                  | AT3G52940                                  | AT1G44835                    | AT2G28760                     |
| AT1G53645                     | AT3G55760                               | AT3G14840                  | AT3G53230                                  | AT1G49410                    | AT2G28900                     |
| AT1G56550                     | AT3G57680                               | AT3G23160                  | AT3G55830                                  | AT1G50030                    | AT2G30950                     |
| AT1G62730                     | AT3G59360                               | AT3G25585                  | AT3G59020                                  | AT1G50110                    | AT2G32520                     |
| AT1G62810                     | AT4G00430                               | AT3G26950                  | AT4G10280                                  | AT1G51160                    | AT2G35490                     |
| AT1G63110                     | AT4G20890                               | AT3G44190                  | AT4G11290                                  | AT1G51710                    | AT2G36460                     |
| AT1G63450                     | AT4G23430                               | AT3G44310                  | AT4G12750                                  | AT1G52740                    | AT2G38230                     |
| AT1G65540                     | AT4G24310                               | AT3G47960                  | AT4G14160                                  | AT1G61730                    | AT2G39750                     |
| AT1G66580                     | AT4G27080                               | AT3G51550                  | AT4G16340                                  | AT1G63660                    | AT2G45740                     |
| AT1G67930                     | AT4G32120                               | AT3G52850                  | AT4G21105                                  | AT1G65020                    | AT2G47380                     |
| AT1G70410                     | AT4G39460                               | AT3G55610                  | AT4G23900                                  | AT1G65220                    | AT3G03810                     |
| AT1G70730                     | AT5G02260                               | AT3G57420                  | AT4G25740                                  | AT1G66430                    | AT3G08610                     |
| AT1G72280                     | AT5G12950                               | AT3G60100                  | AT4G26110                                  | AT1G67120                    | AT3G14290                     |
| AT1G72480                     | AT5G15940                               | AT3G62580                  | AT4G26610                                  | AT1G67430                    | AT3G18430                     |
| AT1G73160                     | AT5G16230                               | AT4G04190                  | AT4G31180                                  | AT1G70580                    | AT3G19870                     |
| AT1G74910                     | AT5G16370                               | AT4G18360                  | AT4G31480                                  | AT1G72150                    | AT3G20670                     |
| AT1G74920                     | AT5G19750                               | AT4G18760                  | AT4G32720                                  | AT1G72540                    | AT3G44830                     |
| AT1G75940                     | AT5G40660                               | AT4G25360                  | AT5G10100                                  | AT1G73180                    | AT3G45300                     |
| AT1G76690                     | AT5G42390                               | AT5G01750                  | AT5G14520                                  | AT1G73590                    | AT3G46040                     |

**Supplementary Tables pertaining to Figure 1**  
**Supplementary Table S3. Root proteins found in a single cell population**

| Root Hairs<br>(COBL9) | Non-Hair<br>Epidermis<br>(WER) | Cortex<br>(CORTEX) | Endodermis<br>/Quiescent<br>(SCR) | Vasculature<br>(WOL) | Columella<br>(PET111) |
|-----------------------|--------------------------------|--------------------|-----------------------------------|----------------------|-----------------------|
| AT1G77710             | AT5G45390                      | AT5G03860          | AT5G27330                         | AT1G74560            | AT3G47730             |
| AT1G78660             | AT5G49030                      | AT5G07980          | AT5G38280                         | AT1G75280            | AT3G52180             |
| AT1G80670             | AT5G49555                      | AT5G07990          | AT5G46700                         | AT1G75640            | AT3G52230             |
| AT2G15390             | AT5G52520                      | AT5G11730          | AT5G47010                         | AT1G75990            | AT3G56170             |
| AT2G16570             | AT5G54810                      | AT5G14220          | AT5G48760                         | AT1G76860            | AT3G58010             |
| AT2G17500             | AT5G54830                      | AT5G20950          | AT5G60670                         | AT1G79500            | AT3G60340             |
| AT2G18030             | AT5G63620                      | AT5G22020          |                                   | AT1G80500            | AT4G00750             |
| AT2G18980             |                                | AT5G22060          |                                   | AT2G01690            | AT4G01750             |
| AT2G19160             |                                | AT5G43600          |                                   | AT2G15270            | AT4G14430             |
| AT2G19860             |                                | AT5G43780          |                                   | AT2G16640            | AT4G19460             |
| AT2G21250             |                                | AT5G44240          |                                   | AT2G16760            | AT4G19640             |
| AT2G22125             |                                | AT5G48880          |                                   | AT2G17790            | AT4G22310             |
| AT2G22500             |                                | AT5G59980          |                                   | AT2G19520            | AT4G23630             |
| AT2G22970             |                                | AT5G60120          |                                   | AT2G20890            | AT4G23850             |
| AT2G24170             |                                | AT5G61840          |                                   | AT2G21620            | AT4G23920             |
| AT2G25830             |                                | AT5G63310          |                                   | AT2G23070            | AT4G25450             |
| AT2G27190             |                                | ATCG00490          |                                   | AT2G26730            | AT4G27400             |
| AT2G30920             |                                |                    |                                   | AT2G27000            | AT4G28390             |
| AT2G34560             |                                |                    |                                   | AT2G27040            | AT4G32920             |
| AT2G34585             |                                |                    |                                   | AT2G28490            | AT4G38790             |
| AT2G35790             |                                |                    |                                   | AT2G31320            | AT5G02240             |
| AT2G35810             |                                |                    |                                   | AT2G31360            | AT5G04610             |
| AT2G37550             |                                |                    |                                   | AT2G32060            | AT5G08580             |
| AT2G37670             |                                |                    |                                   | AT2G32730            | AT5G10560             |
| AT2G38650             |                                |                    |                                   | AT2G33340            | AT5G15490             |
| AT2G40800             |                                |                    |                                   | AT2G35630            | AT5G15520             |
| AT2G41600             |                                |                    |                                   | AT2G36580            | AT5G16170             |
| AT2G43070             |                                |                    |                                   | AT2G36910            | AT5G22790             |
| AT2G44040             |                                |                    |                                   | AT2G37020            | AT5G24960             |
| AT2G45070             |                                |                    |                                   | AT2G37040            | AT5G27670             |
| AT2G45990             |                                |                    |                                   | AT2G37050            | AT5G39730             |
| AT2G47540             |                                |                    |                                   | AT2G39040            | AT5G42420             |
| AT3G01190             |                                |                    |                                   | AT2G40290            | AT5G46180             |
| AT3G01290             |                                |                    |                                   | AT2G40660            | AT5G58070             |
| AT3G02660             |                                |                    |                                   | AT2G41790            | AT5G62200             |
| AT3G03050             |                                |                    |                                   | AT2G42770            | AT5G62740             |
| AT3G04570             |                                |                    |                                   | AT2G42810            | AT5G64350             |
| AT3G05420             |                                |                    |                                   | AT2G43400            | AT5G66280             |
| AT3G06040             |                                |                    |                                   | AT2G43630            |                       |
| AT3G07470             |                                |                    |                                   | AT2G43770            |                       |
| AT3G07950             |                                |                    |                                   | AT2G44100            |                       |
| AT3G08550             |                                |                    |                                   | AT2G45820            |                       |
| AT3G09690             |                                |                    |                                   | AT3G02260            |                       |
| AT3G09740             |                                |                    |                                   | AT3G03220            |                       |
| AT3G10050             |                                |                    |                                   | AT3G03330            |                       |
| AT3G10260             |                                |                    |                                   | AT3G03990            |                       |
| AT3G11170             |                                |                    |                                   | AT3G04600            |                       |
| AT3G11730             |                                |                    |                                   | AT3G04820            |                       |
| AT3G12290             |                                |                    |                                   | AT3G04940            |                       |

**Supplementary Tables pertaining to Figure 1**  
**Supplementary Table S3. Root proteins found in a single cell population**

| Root Hairs<br>(COBL9) | Non-Hair<br>Epidermis<br>(WER) | Cortex<br>(CORTEX) | Endodermis<br>/Quiescent<br>(SCR) | Vasculature<br>(WOL) | Columella<br>(PET111) |
|-----------------------|--------------------------------|--------------------|-----------------------------------|----------------------|-----------------------|
| AT3G12370             |                                |                    |                                   | AT3G07100            |                       |
| AT3G13460             |                                |                    |                                   | AT3G07160            |                       |
| AT3G15290             |                                |                    |                                   | AT3G07390            |                       |
| AT3G15660             |                                |                    |                                   | AT3G07610            |                       |
| AT3G16200             |                                |                    |                                   | AT3G09300            |                       |
| AT3G17910             |                                |                    |                                   | AT3G10380            |                       |
| AT3G18760             |                                |                    |                                   | AT3G12050            |                       |
| AT3G19508             |                                |                    |                                   | AT3G12670            |                       |
| AT3G21400             |                                |                    |                                   | AT3G13300            |                       |
| AT3G21465             |                                |                    |                                   | AT3G16400            |                       |
| AT3G21540             |                                |                    |                                   | AT3G17210            |                       |
| AT3G23190             |                                |                    |                                   | AT3G18060            |                       |
| AT3G23510             |                                |                    |                                   | AT3G20410            |                       |
| AT3G23600             |                                |                    |                                   | AT3G20790            |                       |
| AT3G24503             |                                |                    |                                   | AT3G25800            |                       |
| AT3G27020             |                                |                    |                                   | AT3G44110            |                       |
| AT3G27230             |                                |                    |                                   | AT3G46210            |                       |
| AT3G27300             |                                |                    |                                   | AT3G46940            |                       |
| AT3G27430             |                                |                    |                                   | AT3G47370            |                       |
| AT3G27890             |                                |                    |                                   | AT3G51100            |                       |
| AT3G28480             |                                |                    |                                   | AT3G51670            |                       |
| AT3G29250             |                                |                    |                                   | AT3G52140            |                       |
| AT3G29360             |                                |                    |                                   | AT3G52580            |                       |
| AT3G46560             |                                |                    |                                   | AT3G54470            |                       |
| AT3G48110             |                                |                    |                                   | AT3G56490            |                       |
| AT3G48890             |                                |                    |                                   | AT3G57220            |                       |
| AT3G51440             |                                |                    |                                   | AT3G57410            |                       |
| AT3G51830             |                                |                    |                                   | AT3G58510            |                       |
| AT3G51980             |                                |                    |                                   | AT3G59280            |                       |
| AT3G52190             |                                |                    |                                   | AT3G59890            |                       |
| AT3G52570             |                                |                    |                                   | AT3G59990            |                       |
| AT3G52640             |                                |                    |                                   | AT3G60245            |                       |
| AT3G53180             |                                |                    |                                   | AT3G60770            |                       |
| AT3G53900             |                                |                    |                                   | AT3G60860            |                       |
| AT3G53990             |                                |                    |                                   | AT3G61580            |                       |
| AT3G54840             |                                |                    |                                   | AT3G63130            |                       |
| AT3G55920             |                                |                    |                                   | AT4G01210            |                       |
| AT3G56900             |                                |                    |                                   | AT4G03190            |                       |
| AT3G56950             |                                |                    |                                   | AT4G04940            |                       |
| AT3G57560             |                                |                    |                                   | AT4G08520            |                       |
| AT3G57630             |                                |                    |                                   | AT4G08790            |                       |
| AT3G57660             |                                |                    |                                   | AT4G10260            |                       |
| AT3G58140             |                                |                    |                                   | AT4G11850            |                       |
| AT3G58840             |                                |                    |                                   | AT4G14680            |                       |
| AT3G60440             |                                |                    |                                   | AT4G17270            |                       |
| AT3G60850             |                                |                    |                                   | AT4G18830            |                       |
| AT3G61520             |                                |                    |                                   | AT4G19006            |                       |
| AT3G63190             |                                |                    |                                   | AT4G20980            |                       |
| AT4G00040             |                                |                    |                                   | AT4G23460            |                       |

**Supplementary Tables pertaining to Figure 1**  
**Supplementary Table S3. Root proteins found in a single cell population**

| Root Hairs<br>(COBL9) | Non-Hair<br>Epidermis<br>(WER) | Cortex<br>(CORTEX) | Endodermis<br>/Quiescent<br>(SCR) | Vasculature<br>(WOL) | Columella<br>(PET111) |
|-----------------------|--------------------------------|--------------------|-----------------------------------|----------------------|-----------------------|
| AT4G00100             |                                |                    |                                   | AT4G23540            |                       |
| AT4G00290             |                                |                    |                                   | AT4G23650            |                       |
| AT4G00710             |                                |                    |                                   | AT4G23690            |                       |
| AT4G01660             |                                |                    |                                   | AT4G24550            |                       |
| AT4G04470             |                                |                    |                                   | AT4G26210            |                       |
| AT4G04860             |                                |                    |                                   | AT4G27160            |                       |
| AT4G09990             |                                |                    |                                   | AT4G27170            |                       |
| AT4G11600             |                                |                    |                                   | AT4G29120            |                       |
| AT4G12130             |                                |                    |                                   | AT4G29900            |                       |
| AT4G13050             |                                |                    |                                   | AT4G30080            |                       |
| AT4G13200             |                                |                    |                                   | AT4G31700            |                       |
| AT4G16180             |                                |                    |                                   | AT4G33650            |                       |
| AT4G16210             |                                |                    |                                   | AT4G35490            |                       |
| AT4G16500             |                                |                    |                                   | AT4G35580            |                       |
| AT4G17040             |                                |                    |                                   | AT4G37190            |                       |
| AT4G17420             |                                |                    |                                   | AT4G38630            |                       |
| AT4G18230             |                                |                    |                                   | AT4G39200            |                       |
| AT4G20020             |                                |                    |                                   | AT5G02530            |                       |
| AT4G20460             |                                |                    |                                   | AT5G05690            |                       |
| AT4G21180             |                                |                    |                                   | AT5G06060            |                       |
| AT4G21540             |                                |                    |                                   | AT5G08610            |                       |
| AT4G21570             |                                |                    |                                   | AT5G08670            |                       |
| AT4G22214             |                                |                    |                                   | AT5G09420            |                       |
| AT4G23640             |                                |                    |                                   | AT5G09510            |                       |
| AT4G25570             |                                |                    |                                   | AT5G10540            |                       |
| AT4G26010             |                                |                    |                                   | AT5G11240            |                       |
| AT4G27640             |                                |                    |                                   | AT5G11700            |                       |
| AT4G27720             |                                |                    |                                   | AT5G13000            |                       |
| AT4G28050             |                                |                    |                                   | AT5G13520            |                       |
| AT4G29430             |                                |                    |                                   | AT5G14105            |                       |
| AT4G31460             |                                |                    |                                   | AT5G15610            |                       |
| AT4G32880             |                                |                    |                                   | AT5G16450            |                       |
| AT4G34140             |                                |                    |                                   | AT5G16550            |                       |
| AT4G34180             |                                |                    |                                   | AT5G19130            |                       |
| AT4G35860             |                                |                    |                                   | AT5G24350            |                       |
| AT5G01220             |                                |                    |                                   | AT5G24690            |                       |
| AT5G02050             |                                |                    |                                   | AT5G27640            |                       |
| AT5G04710             |                                |                    |                                   | AT5G27770            |                       |
| AT5G04960             |                                |                    |                                   | AT5G37830            |                       |
| AT5G05990             |                                |                    |                                   | AT5G39740            |                       |
| AT5G07350             |                                |                    |                                   | AT5G43010            |                       |
| AT5G09450             |                                |                    |                                   | AT5G44510            |                       |
| AT5G10830             |                                |                    |                                   | AT5G46430            |                       |
| AT5G12200             |                                |                    |                                   | AT5G47690            |                       |
| AT5G14060             |                                |                    |                                   | AT5G48480            |                       |
| AT5G14580             |                                |                    |                                   | AT5G51820            |                       |
| AT5G16290             |                                |                    |                                   | AT5G53400            |                       |
| AT5G16390             |                                |                    |                                   | AT5G56010            |                       |
| AT5G16660             |                                |                    |                                   | AT5G56680            |                       |



**Supplementary Tables pertaining to Figure 1**  
**Supplementary Table S3. Root proteins found in a single cell population**

| Root Hairs<br>(COBL9) | Non-Hair<br>Epidermis<br>(WER) | Cortex<br>(CORTEX) | Endodermis<br>/Quiescent<br>(SCR) | Vasculature<br>(WOL) | Columella<br>(PET111) |
|-----------------------|--------------------------------|--------------------|-----------------------------------|----------------------|-----------------------|
| AT5G16930             |                                |                    |                                   | AT5G57020            |                       |
| AT5G18900             |                                |                    |                                   | AT5G57290            |                       |
| AT5G19370             |                                |                    |                                   | AT5G59010            |                       |
| AT5G20350             |                                |                    |                                   | AT5G60040            |                       |
| AT5G20490             |                                |                    |                                   | AT5G61020            |                       |
| AT5G20980             |                                |                    |                                   | AT5G61140            |                       |
| AT5G22330             |                                |                    |                                   | AT5G61170            |                       |
| AT5G22350             |                                |                    |                                   | AT5G62190            |                       |
| AT5G22740             |                                |                    |                                   | AT5G62670            |                       |
| AT5G23740             |                                |                    |                                   | AT5G64270            |                       |
| AT5G25940             |                                |                    |                                   | AT5G65270            |                       |
| AT5G27395             |                                |                    |                                   | AT5G65700            |                       |
| AT5G27430             |                                |                    |                                   |                      |                       |
| AT5G28220             |                                |                    |                                   |                      |                       |
| AT5G38460             |                                |                    |                                   |                      |                       |
| AT5G40580             |                                |                    |                                   |                      |                       |
| AT5G43430             |                                |                    |                                   |                      |                       |
| AT5G43830             |                                |                    |                                   |                      |                       |
| AT5G44710             |                                |                    |                                   |                      |                       |
| AT5G44820             |                                |                    |                                   |                      |                       |
| AT5G46160             |                                |                    |                                   |                      |                       |
| AT5G47040             |                                |                    |                                   |                      |                       |
| AT5G47420             |                                |                    |                                   |                      |                       |
| AT5G47780             |                                |                    |                                   |                      |                       |
| AT5G48180             |                                |                    |                                   |                      |                       |
| AT5G49270             |                                |                    |                                   |                      |                       |
| AT5G49680             |                                |                    |                                   |                      |                       |
| AT5G52210             |                                |                    |                                   |                      |                       |
| AT5G53340             |                                |                    |                                   |                      |                       |
| AT5G54500             |                                |                    |                                   |                      |                       |
| AT5G55200             |                                |                    |                                   |                      |                       |
| AT5G56350             |                                |                    |                                   |                      |                       |
| AT5G56730             |                                |                    |                                   |                      |                       |
| AT5G58270             |                                |                    |                                   |                      |                       |
| AT5G58784             |                                |                    |                                   |                      |                       |
| AT5G59910             |                                |                    |                                   |                      |                       |
| AT5G60730             |                                |                    |                                   |                      |                       |
| AT5G61580             |                                |                    |                                   |                      |                       |
| AT5G62270             |                                |                    |                                   |                      |                       |
| AT5G64670             |                                |                    |                                   |                      |                       |
| AT5G66060             |                                |                    |                                   |                      |                       |
| ATMG00560             |                                |                    |                                   |                      |                       |

**Supplementary Tables pertaining to Figure 1**

**Supplementary Table S4. Proteins from the root cellular proteome also identified as root organ-specific biomarkers by Baerenfaller et al. 2008**

| Locus     | Annotation                                                                                                                                                                                                                                                       | Root Hairs (COBL9) | Non-Hair Epidermis (WER) | Cortex (CORTEX) | Endodermis/ Quiescent (SCR) | Vasculature (WOL) | Columella (PET111) |
|-----------|------------------------------------------------------------------------------------------------------------------------------------------------------------------------------------------------------------------------------------------------------------------|--------------------|--------------------------|-----------------|-----------------------------|-------------------|--------------------|
| AT1G14220 | ribonuclease T2 family protein, contains similarity to S-like ribonuclease PD1 GI:9957752 from ( <i>Prunus dulcis</i> ); contains ribonuclease T2 family histidine protein motif                                                                                 | 1                  | 0                        | 0               | 0                           | 1                 | 0                  |
| AT1G15210 | ABC transporter family protein, Similar to gb:Z70524 GI:1514643 PDR5-like ABC transporter from <i>Spirodela polyrrhiza</i> and is a member of the PF:00005 ABC transporter family. ESTs gb:N97039 and gb:T43169 come from this gene                              | 1                  | 0                        | 1               | 1                           | 1                 | 0                  |
| AT1G17180 | ATGSTU25__glutathione S-transferase, putative, Second of three repeated putative glutathione transferases. 72% identical to glutathione transferase ( <i>Arabidopsis thaliana</i> ) (gi:4006934). Location of ests 191A10T7 (gb:R90188) and 171N13T7 (gb:R65532) | 1                  | 0                        | 0               | 0                           | 0                 | 1                  |
| AT1G30870 | cationic peroxidase, putative, similar to cationic peroxidase (gi:1232069); similar to EST gb:AI100412                                                                                                                                                           | 1                  | 0                        | 0               | 0                           | 0                 | 0                  |
| AT1G47600 | glycosyl hydrolase family 1 protein, contains Pfam PF00232 : Glycosyl hydrolase family 1 domain; TIGRFAM TIGR01233: 6-phospho-beta-galactosidase; similar to thioglucosidase (GI:871992) ( <i>Arabidopsis thaliana</i> )                                         | 0                  | 0                        | 0               | 0                           | 0                 | 1                  |
| AT1G56550 | expressed protein                                                                                                                                                                                                                                                | 1                  | 0                        | 0               | 0                           | 0                 | 0                  |

**Supplementary Tables pertaining to Figure 1**

**Supplementary Table S4. Proteins from the root cellular proteome also identified as root organ-specific biomarkers by Baerenfaller et al. 2008**

| Locus     | Annotation                                                                                                                                                                                                                                                                                                                               | Root Hairs (COBL9) | Non-Hair Epidermis (WER) | Cortex (CORTEX) | Endodermis/ Quiescent (SCR) | Vasculature (WOL) | Columella (PET111) |
|-----------|------------------------------------------------------------------------------------------------------------------------------------------------------------------------------------------------------------------------------------------------------------------------------------------------------------------------------------------|--------------------|--------------------------|-----------------|-----------------------------|-------------------|--------------------|
| AT1G66270 | beta-glucosidase (PSR3.2), nearly identical to GI:2286069 from ( <i>Arabidopsis thaliana</i> ) (Plant Mol. Biol. 34 (1), 57-68 (1997)); similar to thioglucoside glucohydrolase (GI:984052) ( <i>Arabidopsis thaliana</i> )                                                                                                              | 1                  | 1                        | 1               | 1                           | 1                 | 1                  |
| AT1G67330 | expressed protein, contains Pfam profile PF04669: Protein of unknown function (DUF579)                                                                                                                                                                                                                                                   | 1                  | 1                        | 1               | 0                           | 1                 | 0                  |
| AT1G78860 | curculin-like (mannose-binding) lectin family protein, low similarity to Ser/Thr protein kinase ( <i>Zea mays</i> ) GI:2598067; contains Pfam profile PF01453: Lectin (probable mannose binding) but not the protein kinase domain of the <i>Z. mays</i> protein                                                                         | 0                  | 0                        | 0               | 1                           | 0                 | 0                  |
| AT2G15390 | FUT4_ATFUT4_xyloglucan fucosyltransferase, putative (FUT4), identical to SP:Q9SJP2 Probable fucosyltransferase 4 (EC 2.4.1.-) (AtFUT4) { <i>Arabidopsis thaliana</i> }; similar to SP:Q9SWH5 Galactoside 2-alpha-L-fucosyltransferase (EC 2.4.1.69) (Xyloglucan alpha-(1,2)-fucosyltransferase) (AtFUT1) { <i>Arabidopsis thaliana</i> } | 1                  | 0                        | 0               | 0                           | 0                 | 0                  |
| AT2G16005 | MD-2-related lipid recognition domain-containing protein / ML domain-containing protein, contains Pfam profile PF02221: ML domain                                                                                                                                                                                                        | 1                  | 0                        | 0               | 0                           | 0                 | 1                  |
| AT2G18980 | peroxidase, putative, identical to peroxidase ATP22a ( <i>Arabidopsis thaliana</i> )<br>gi:1620369:emb:CAA70034                                                                                                                                                                                                                          | 1                  | 0                        | 0               | 0                           | 0                 | 0                  |

**Supplementary Tables pertaining to Figure 1**

**Supplementary Table S4. Proteins from the root cellular proteome also identified as root organ-specific biomarkers by Baerenfaller et al. 2008**

| Locus     | Annotation                                                                                                                                                                                                                                                                          | Root Hairs (COBL9) | Non-Hair Epidermis (WER) | Cortex (CORTEX) | Endodermis/ Quiescent (SCR) | Vasculature (WOL) | Columella (PET111) |
|-----------|-------------------------------------------------------------------------------------------------------------------------------------------------------------------------------------------------------------------------------------------------------------------------------------|--------------------|--------------------------|-----------------|-----------------------------|-------------------|--------------------|
| AT2G38840 | guanylate-binding family protein, similar to SP:Q01514 Interferon-induced guanylate-binding protein 1 (Guanine nucleotide-binding protein 1) (Interferon-gamma inducible protein MAG-1) {Mus musculus}; contains Pfam profile PF02263: Guanylate-binding protein, N-terminal domain | 0                  | 1                        | 1               | 0                           | 0                 | 0                  |
| AT3G01190 | peroxidase 27 (PER27) (P27) (PRXR7), identical to SP:Q43735 Peroxidase 27 precursor (EC 1.11.1.7) (Atperox P27) (PRXR7) (ATP12a) {Arabidopsis thaliana}                                                                                                                             | 1                  | 0                        | 0               | 0                           | 0                 | 0                  |
| AT3G01720 | expressed protein                                                                                                                                                                                                                                                                   | 1                  | 0                        | 0               | 0                           | 1                 | 0                  |
| AT3G08610 | expressed protein                                                                                                                                                                                                                                                                   | 0                  | 0                        | 0               | 0                           | 0                 | 1                  |
| AT3G16410 | jacalin lectin family protein, similar to myrosinase-binding protein homolog (Arabidopsis thaliana) GI:2997767, epithiospecifier (Arabidopsis thaliana) GI:16118845; contains Pfam profiles PF01419 jacalin-like lectin family, PF01344 Kelch motif                                 | 1                  | 1                        | 0               | 0                           | 1                 | 1                  |
| AT3G16430 | jacalin lectin family protein, similar to myrosinase binding protein (Brassica napus) GI:1711296; contains Pfam profile PF01419 jacalin-like lectin domain                                                                                                                          | 1                  | 1                        | 0               | 0                           | 0                 | 1                  |
| AT3G19390 | cysteine proteinase, putative / thiol protease, putative, contains similarity to cysteine proteinase RD21A (thiol protease) GI:435619, SP:P43297 from (Arabidopsis thaliana)                                                                                                        | 1                  | 0                        | 0               | 0                           | 1                 | 0                  |

**Supplementary Tables pertaining to Figure 1**

**Supplementary Table S4. Proteins from the root cellular proteome also identified as root organ-specific biomarkers by Baerenfaller et al. 2008**

| Locus     | Annotation                                                                                                                                                                                                                                                                                                        | Root Hairs (COBL9) | Non-Hair Epidermis (WER) | Cortex (CORTEX) | Endodermis/ Quiescent (SCR) | Vasculature (WOL) | Columella (PET111) |
|-----------|-------------------------------------------------------------------------------------------------------------------------------------------------------------------------------------------------------------------------------------------------------------------------------------------------------------------|--------------------|--------------------------|-----------------|-----------------------------|-------------------|--------------------|
| AT3G21400 | expressed protein                                                                                                                                                                                                                                                                                                 | 1                  | 0                        | 0               | 0                           | 0                 | 0                  |
| AT3G48340 | similar to cysteine proteinase, putative [Arabidopsis thaliana] (TAIR:At3g48350.1); similar to cysteine proteinase [Glycine max] (GB:BAC77522.1); contains InterPro domain Papain cysteine protease (C1) (InterPro:IPR000668); contains InterPro domain Eukaryotic thiol (cysteine) protease (InterPro:IPR000169) | 1                  | 1                        | 1               | 0                           | 1                 | 1                  |
| AT3G53480 | ABC transporter family protein, PDR5-like ABC transporter, Spirodela polyrrhiza, EMBL:Z70524                                                                                                                                                                                                                      | 1                  | 1                        | 0               | 0                           | 0                 | 1                  |
| AT4G08770 | peroxidase, putative, identical to class III peroxidase ATP38 (Arabidopsis thaliana) gi:17530568:gb:AAL40851; similar to peroxidase C2 precursor (Armoracia rusticana) SWISS-PROT: P17179; identical to cDNA class III peroxidase ATP38 GI:17530567                                                               | 0                  | 0                        | 0               | 1                           | 1                 | 0                  |
| AT4G23710 | vacuolar ATP synthase subunit G 2 (VATG2) / V-ATPase G subunit 2 (VAG2) / vacuolar proton pump G subunit 2, identical to Swiss-Prot:O82629 vacuolar ATP synthase subunit G 2 (V-ATPase G subunit 2, Vacuolar proton pump G subunit 2) (Arabidopsis thaliana)                                                      | 1                  | 0                        | 0               | 0                           | 1                 | 0                  |

**Supplementary Tables pertaining to Figure 1**

**Supplementary Table S4. Proteins from the root cellular proteome also identified as root organ-specific biomarkers by Baerenfaller et al. 2008**

| Locus     | Annotation                                                                                                                                                                                                                                                                                                                                                                              | Root Hairs (COBL9) | Non-Hair Epidermis (WER) | Cortex (CORTEX) | Endodermis/ Quiescent (SCR) | Vasculature (WOL) | Columella (PET111) |
|-----------|-----------------------------------------------------------------------------------------------------------------------------------------------------------------------------------------------------------------------------------------------------------------------------------------------------------------------------------------------------------------------------------------|--------------------|--------------------------|-----------------|-----------------------------|-------------------|--------------------|
| AT4G26010 | peroxidase, putative, peroxidase ATP13a - Arabidopsis thaliana, PID:e264765; identical to cDNA class III peroxidase ATP35, GI:17530565                                                                                                                                                                                                                                                  | 1                  | 0                        | 0               | 0                           | 0                 | 0                  |
| AT4G27860 | integral membrane family protein, contains Pfam PF01988: Integral membrane protein                                                                                                                                                                                                                                                                                                      | 1                  | 1                        | 0               | 0                           | 0                 | 0                  |
| AT4G29690 | type I phosphodiesterase/nucleotide pyrophosphatase family protein, similar to SP:P22413 Ectonucleotide pyrophosphatase/phosphodiesterase 1 (Plasma-cell membrane glycoprotein PC-1) (Includes: Alkaline phosphodiesterase I (EC 3.1.4.1); Nucleotide pyrophosphatase (EC 3.6.1.9) {Homo sapiens}; contains Pfam profile PF01663: Type I phosphodiesterase / nucleotide pyrophosphatase | 1                  | 1                        | 1               | 0                           | 1                 | 1                  |
| AT4G30170 | peroxidase, putative, identical to peroxidase ATP8a (Arabidopsis thaliana) gi:1546706:emb:CAA67361                                                                                                                                                                                                                                                                                      | 1                  | 0                        | 1               | 0                           | 0                 | 0                  |
| AT5G02260 | ATEXPA9_ATEXP9_ATHEXP ALPHA 1.10_EXP9__expansin, putative (EXP9), similar to expansin precursor GI:4138914 from (Lycopersicon esculentum); alpha-expansin gene family, PMID:11641069                                                                                                                                                                                                    | 0                  | 1                        | 0               | 0                           | 0                 | 0                  |

**Supplementary Tables pertaining to Figure 1**

**Supplementary Table S4. Proteins from the root cellular proteome also identified as root organ-specific biomarkers by Baerenfaller et al. 2008**

| Locus     | Annotation                                                                                                                                                                                                    | Root Hairs (COBL9) | Non-Hair Epidermis (WER) | Cortex (CORTEX) | Endodermis/ Quiescent (SCR) | Vasculature (WOL) | Columella (PET111) |
|-----------|---------------------------------------------------------------------------------------------------------------------------------------------------------------------------------------------------------------|--------------------|--------------------------|-----------------|-----------------------------|-------------------|--------------------|
| AT5G04960 | pectinesterase family protein, contains Pfam profile: PF01095 pectinesterase                                                                                                                                  | 1                  | 0                        | 0               | 0                           | 0                 | 0                  |
| AT5G17820 | peroxidase 57 (PER57) (P57) (PRXR10), identical to SP:Q43729 Peroxidase 57 precursor (EC 1.11.1.7) (Atperox P57) (PRXR10) (ATP13a) (Arabidopsis thaliana)                                                     | 1                  | 1                        | 0               | 1                           | 1                 | 0                  |
| AT5G23830 | MD-2-related lipid recognition domain-containing protein / ML domain-containing protein, contains Pfam profile PF02221: ML domain                                                                             | 1                  | 1                        | 1               | 0                           | 1                 | 1                  |
| AT5G26260 | meprin and TRAF homology domain-containing protein / MATH domain-containing protein, similar to ubiquitin-specific protease 12 (Arabidopsis thaliana) GI:11993471; contains Pfam profile PF00917: MATH domain | 1                  | 1                        | 1               | 1                           | 1                 | 1                  |
| AT5G35940 | jacalin lectin family protein, similar to myrosinase-binding protein homolog (Arabidopsis thaliana) GI:2997767; contains Pfam profile PF01419 jacalin-like lectin domain                                      | 1                  | 1                        | 0               | 0                           | 1                 | 1                  |
| AT5G40510 | expressed protein                                                                                                                                                                                             | 1                  | 1                        | 0               | 0                           | 1                 | 0                  |
| AT5G42590 | CYP71A16__cytochrome P450 71A16, putative (CYP71A16), Identical to Cytochrome P450 71A16 (SP:Q9FH66) (Arabidopsis thaliana)                                                                                   | 0                  | 1                        | 1               | 0                           | 0                 | 1                  |
| AT5G47990 | CYP705A5__cytochrome P450 family protein, similar to Cytochrome P450 93A3 (P450 CP5) (SP:O81973) (Glycine max);                                                                                               | 1                  | 1                        | 1               | 0                           | 1                 | 1                  |

**Supplementary Tables pertaining to Figure 1**

**Supplementary Table S4. Proteins from the root cellular proteome also identified as root organ-specific biomarkers by Baerenfaller et al. 2008**

| Locus     | Annotation                                                                                                                                 | Root Hairs (COBL9) | Non-Hair Epidermis (WER) | Cortex (CORTEX) | Endodermis/ Quiescent (SCR) | Vasculature (WOL) | Columella (PET111) |
|-----------|--------------------------------------------------------------------------------------------------------------------------------------------|--------------------|--------------------------|-----------------|-----------------------------|-------------------|--------------------|
| AT5G48000 | CYP708A2__cytochrome P450 family protein, similar to steroid 22-alpha-hydroxylase; DWF4; CYP90B1 (GI:2935342) (Arabidopsis thaliana)       | 1                  | 1                        | 1               | 0                           | 1                 | 1                  |
| AT5G48010 | ATPEN1_04C11__Encodes an oxidosqualene cyclase involved in the biosynthesis of thalianol, a tricyclic triterpenoid of unknown function.    | 1                  | 1                        | 1               | 0                           | 1                 | 0                  |
| AT5G60660 | PIP2;4_PIP2F__major intrinsic family protein / MIP family protein, similar to mipC protein GI:1657948 from (Mesembryanthemum crystallinum) | 1                  | 0                        | 1               | 0                           | 1                 | 1                  |
| AT5G64100 | peroxidase, putative, identical to peroxidase ATP3a (Arabidopsis thaliana) gi:1546698:emb:CAA67340                                         | 1                  | 0                        | 1               | 0                           | 0                 | 0                  |



## Supplementary Tables pertaining to Figure 1

### Supplementary Table S5. Known regulators of cellular development detected in a single root cell population

| Locus     | Protein Name                       | Root Cells Identified | Literature reference supporting a root developmental role                                                                                                                                                                                                                       |
|-----------|------------------------------------|-----------------------|---------------------------------------------------------------------------------------------------------------------------------------------------------------------------------------------------------------------------------------------------------------------------------|
| At3g03050 | CELLULOSE SYNTHASE-LIKE D3 (CSLD3) | Root Hairs (COBL9)    | CSLD3. Wang X, Cnops G, Vanderhaeghen R, De Block S, Van Montagu M, Van Lijsebettens M (2001) AtCSLD3, a cellulose synthase-like gene important for root hair growth in Arabidopsis. <i>Plant Physiol</i> 126:575-586                                                           |
|           | KOJAK (KJK)                        |                       | KJK. Favery B, Ryan E, Foreman J, Linstead P, Boudonck K, Steer M, Shaw P, Dolan L (2001) KOJAK encodes a cellulose synthase-like protein required for root hair cell morphogenesis in Arabidopsis. <i>Genes Dev</i> 15:79-89                                                   |
| At3g08550 | ABA-INSENSITIVE8 (ABI8)            | Root Hairs (COBL9)    | ABI8. Brocard-Gifford I, Lynch TJ, Garcia ME, Malhotra B, Finkelstein RR (2004) The Arabidopsis thaliana ABSCISIC ACID-INSENSITIVE8 encodes a novel protein mediating abscisic acid and sugar responses essential for growth. <i>Plant Cell</i> 16:406-421                      |
|           | ELONGATION DEFECTIVE 1 (ELD1)      |                       | ELD1. Cheng JC, Lertpiriyapong K, Wang S, Sung ZR (2000) The role of the Arabidopsis ELD1 gene in cell development and photomorphogenesis in darkness. <i>Plant Physiol</i> 123:509-520                                                                                         |
|           | KOBITO1 (KOB1)                     |                       | KOB1. Pagant S, Bichet A, Sugimoto K, Lerouxel O, Desprez T, McCann M, Lerouge P, Vernhettes S, Höfte H (2002) KOBITO1 encodes a novel plasma membrane protein necessary for normal synthesis of cellulose during cell expansion in Arabidopsis. <i>Plant Cell</i> 14:2001-2013 |
| At4g23640 | TINY ROOT HAIR 1 (TRH1)            | Root Hairs (COBL9)    | TRH1. Rigas S, Debrosses G, Haralampidis K, Vicente-Agullo F, Feldmann KA, Grabov A, Dolan L, Hatzopoulos P (2001) TRH1 encodes a potassium transporter required for tip growth in Arabidopsis root hairs. <i>Plant Cell</i> 13:139-151                                         |
| At5g20350 | TIP GROWTH DEFECTIVE 1 (TIP1)      | Root Hairs (COBL9)    | TIP1. Schiefelbein J, Galway M, Masucci J, Ford S (1993) Pollen tube and root-hair tip growth is disrupted in a mutant of Arabidopsis thaliana. <i>Plant Physiol</i> 103:979-985                                                                                                |
|           |                                    |                       | TIP1. Hemsley PA, Kemp AC, Grierson CS (2005) The TIP GROWTH DEFECTIVE1 S-acyl transferase regulates plant cell growth in Arabidopsis. <i>Plant Cell</i> 17:2554-2563                                                                                                           |
| At5g49270 | COBRA-LIKE 9 (COBL9)               | Root Hairs (COBL9)    | COBL9. Roudier F, Schindelman G, DeSalle R, Benfey PN (2002) The COBRA family of putative GPI-anchored proteins in Arabidopsis. A new fellowship in expansion. <i>Plant Physiol</i> 130:538-548                                                                                 |
|           | DEFORMED ROOT HAIRS 9 (DER9)       |                       | DER9. Ringli C, Baumberger N, Keller B (2005) The Arabidopsis root hair mutants der2-der9 are affected at different stages of root hair development. <i>Plant Cell Physiol</i> 46:1046-1053                                                                                     |
|           | MUTANT ROOT HAIRS 4 (MRH4)         |                       | MRH4. Jones MA, Raymond MJ, Smirnov N (2006) Analysis of the root-hair morphogenesis transcriptome reveals the molecular identity of six genes with roles in root-hair development in Arabidopsis. <i>Plant J</i> 45:83-100                                                     |

**Supplementary Tables pertaining to Figure 1**

**Supplementary Table S5. Known regulators of cellular development detected in a single root cell population**

| Locus     | Protein Name                                                    | Root Cells Identified      | Literature reference supporting a root developmental role                                                                                                                                                                                                                                                                                                                                                       |
|-----------|-----------------------------------------------------------------|----------------------------|-----------------------------------------------------------------------------------------------------------------------------------------------------------------------------------------------------------------------------------------------------------------------------------------------------------------------------------------------------------------------------------------------------------------|
|           | SHAVEN 2 (SHV2)                                                 |                            | SHV2. Parker JS, Cavell AC, Dolan L, Roberts K, Grierson CS (2000) Genetic interactions during root hair morphogenesis in Arabidopsis. <i>Plant Cell</i> 12:1961-1974                                                                                                                                                                                                                                           |
| At5g49680 | KINKY POLLEN (KIP)                                              | Root Hairs (COBL9)         | KIP. Procissi A, Guyon A, Pierson ES, Giritch A, Knuiman B, Grandjean O, Tonelli C, Derksen J, Pelletier G, Bonhomme S (2003) KINKY POLLEN encodes a SABRE-like protein required for tip growth in Arabidopsis and conserved among eukaryotes. <i>Plant J</i> 36:894-904                                                                                                                                        |
| At1g01950 | ARMADILLO REPEAT KINESIN2 (ARK2)                                | Non-Hair Epidermis (WER)   | ARK2. Sakai T, Honing H, Nishioka M, Uehara Y, Takahashi M, Fujisawa N, Saji K, Seki M, Shinozaki K, Jones MA, Smirnov N, Okada K, Wasteneys GO (2008) Armadillo repeat-containing kinesins and a NIMA-related kinase are required for epidermal-cell morphogenesis in Arabidopsis. <i>Plant J</i> 53:157-171.                                                                                                  |
| At3g54640 | TRYPTOPHAN-REQUIRING 3 (TRP3)                                   | Non-Hair Epidermis (WER)   | TRP3. Rutherford R, Gallois P, Masson PH (1998) Mutations in Arabidopsis thaliana genes involved in the tryptophan biosynthesis pathway affect root waving on tilted agar surfaces. <i>Plant J</i> 16:145-154                                                                                                                                                                                                   |
| At2g40890 | CYTOCHROME P450, FAMILY 98, SUBFAMILY1, POLYPEPTIDE 3 (CYP98A3) | Cortex (CORTEX)            | CYP98A3. Abdulrazzak N, Pollet B, Ehling J, Larsen K, Asnaghi C, Ronseau S, Proux C, Erhardt M, Seltzer V, Renou JP, Ullmann P, Pauly M, Lapierre C, Werck-Reichhart D (2006) A coumaroyl-ester-3-hydroxylase insertion mutant reveals the existence of nonredundant meta-hydroxylation pathways and essential roles for phenolic precursors in cell expansion and plant growth. <i>Plant Physiol</i> 140:30-48 |
| At3g52940 | FACKEL (FK)                                                     | Endodermis/Quiescent (SCR) | FK. Schrick K, Mayer U, Horrichs A, Kuhnt C, Bellini C, Dangl J, Schmidt J, Jürgens G (2000) FACKEL is a sterol C-14 reductase required for organized cell division and expansion in Arabidopsis embryogenesis. <i>Genes Dev</i> 14:1471-1484                                                                                                                                                                   |
|           | EXTRA-LONG-LIFESPAN 1 (ELL1)                                    |                            | ELL1. Jang JC, Fujioka S, Tasaka M, Seto H, Takatsuto S, Ishii A, Aida M, Yoshida S, Sheen J (2000) A critical role of sterols in embryonic patterning and meristem programming revealed by the fackel mutants of Arabidopsis thaliana. <i>Genes Dev</i> 14:1485-1497                                                                                                                                           |
|           | HYDRA2 (HYD2)                                                   |                            | HYD2. Souter M, Topping J, Pullen M, Friml J, Palme K, Hackett R, Grierson D, Lindsey K (2002) hydra Mutants of Arabidopsis are defective in sterol profiles and auxin and ethylene signaling. <i>Plant Cell</i> 14:1017-1031                                                                                                                                                                                   |
| At3g55830 | ECTOPICALLY PARTING CELLS (EPC1)                                | Endodermis/Quiescent (SCR) | EPC1. Singh SK, Eland C, Harholt J, Scheller HV, Marchant A (2005) Cell adhesion in Arabidopsis thaliana is mediated by ECTOPICALLY PARTING CELLS 1--a glycosyltransferase (GT64) related to the animal exostosins. <i>Plant J</i> 43:384-397                                                                                                                                                                   |

**Supplementary Tables pertaining to Figure 1**

**Supplementary Table S5. Known regulators of cellular development detected in a single root cell population**

| Locus     | Protein Name                                          | Root Cells Identified | Literature reference supporting a root developmental role                                                                                                                                                                                                                                       |
|-----------|-------------------------------------------------------|-----------------------|-------------------------------------------------------------------------------------------------------------------------------------------------------------------------------------------------------------------------------------------------------------------------------------------------|
| At1g01040 | SHORT INTEGUMENTS (SIN1)                              | Vasculature (WOL)     | SIN1. Robinson-Beers K, Pruitt RE, Gasser CS (1992) Ovule Development in Wild-Type Arabidopsis and Two Female-Sterile Mutants. <i>Plant Cell</i> 4:1237-1249                                                                                                                                    |
|           | SUSPENSOR1 (SUS1)                                     |                       | SUS1. Schwartz BW, Yeung EC, Meinke DW (1994) Disruption of morphogenesis and transformation of the suspensor in abnormal suspensor mutants of Arabidopsis. <i>Development</i> 120:3235-3245                                                                                                    |
|           | CARPEL FACTORY (CAF)                                  |                       | CAF1. Jacobsen SE, Running MP, Meyerowitz EM (1999) Disruption of an RNA helicase/RNase III gene in Arabidopsis causes unregulated cell division in floral meristems. <i>Development</i> 126:5231-5243                                                                                          |
|           | DICER-LIKE1 (DCL1)                                    |                       | DCL1. SIN1. SUS1. CAF1. Golden TA, Schauer SE, Lang JD, Pien S, Mushegian AR, Grossniklaus U, Meinke DW, Ray A (2002) SHORT INTEGUMENTS1/SUSPENSOR1/CARPEL FACTORY, a Dicer homolog, is a maternal effect gene required for embryo development in Arabidopsis. <i>Plant Physiol</i> 130:808-822 |
| At1g15750 | TOPLESS                                               |                       | TPL. Long JA, Woody S, Poethig S, Meyerowitz EM, Barton MK (2002) Transformation of shoots into roots in Arabidopsis embryos mutant at the TOPLESS locus. <i>Development</i> 129:2797-2806                                                                                                      |
|           |                                                       |                       | TPL. Smith ZR, Long JA (2010) Control of Arabidopsis apical-basal embryo polarity by antagonistic transcription factors. <i>Nature</i> 464:423-426                                                                                                                                              |
| At1g50030 | TARGET OF RAPAMYCIN (TOR)                             | Vasculature (WOL)     | TOR. Menand B, Desnos T, Nussaume L, Berger F, Bouchez D, Meyer C, Robaglia C (2002) Expression and disruption of the Arabidopsis TOR (target of rapamycin) gene. <i>PNAS</i> 99:6422-6427                                                                                                      |
|           |                                                       |                       | TOR. Deprost D, Yao L, Sormani R, Moreau M, Leterreux G, Nicolai M, Bedu M, Robaglia C, Meyer C (2007) The Arabidopsis TOR kinase links plant growth, yield, stress resistance and mRNA translation. <i>EMBO Rep</i> 8:864-870                                                                  |
| At1g73590 | PIN-FORMED (PIN1)                                     | Vasculature (WOL)     | PIN1. Okada K, Ueda J, Komaki MK, Bell CJ, Shimura Y (1991) Requirement of the Auxin Polar Transport System in Early Stages of Arabidopsis Floral Bud Formation. <i>Plant Cell</i> 3:677-684                                                                                                    |
|           |                                                       |                       | PIN1. Gälweiler L, Guan C, Müller A, Wisman E, Mendgen K, Yephremov A, Palme K (1998) Regulation of polar auxin transport by AtPIN1 in Arabidopsis vascular tissue. <i>Science</i> 282:2226-2230                                                                                                |
| At2g35630 | MICROTUBULE ORGANIZATION 1 (MOR1)                     | Vasculature (WOL)     | MOR1. Whittington AT, Vugrek O, Wei KJ, Hasenbein NG, Sugimoto K, Rashbrooke MC, Wasteneys GO (2001) MOR1 is essential for organizing cortical microtubules in plants. <i>Nature</i> 411:610-613                                                                                                |
| At2g36910 | Arabidopsis thaliana P-GLYCOPROTEIN PROTEIN1 (AtPGP1) | Vasculature (WOL)     | AtPGP1. Sidler M, Hassa P, Hasan S, Ringli C, Dudler R (1998) Involvement of an ABC transporter in a developmental pathway regulating hypocotyl cell elongation in the light. <i>Plant Cell</i> 10:1623-1636                                                                                    |

**Supplementary Tables pertaining to Figure 1**

**Supplementary Table S5. Known regulators of cellular development detected in a single root cell population**

| Locus     | Protein Name                          | Root Cells Identified | Literature reference supporting a root developmental role                                                                                                                                                                                                                                                                     |
|-----------|---------------------------------------|-----------------------|-------------------------------------------------------------------------------------------------------------------------------------------------------------------------------------------------------------------------------------------------------------------------------------------------------------------------------|
|           |                                       |                       | PGP1. Blakeslee JJ, Bandyopadhyay A, Lee OR, Mravec J, Titapiwatanakun B, Sauer M, Makam SN, Cheng Y, Bouchard R, Adamec J, Geisler M, Nagashima A, Sakai T, Martinoia E, Friml J, Peer WA, Murphy AS (2007) Interactions among PIN-FORMED and P-glycoprotein auxin transporters in Arabidopsis. <i>Plant Cell</i> 19:131-147 |
| At3g02260 | TRANSPORT INHIBITOR RESISTANT3 (TIR3) | Vasculature (WOL)     | TIR3. Ruegger M, Dewey E, Hobbie L, Brown D, Bernasconi P, Turner J, Muday G, Estelle M (1997) Reduced naphthylphthalamic acid binding in the tir3 mutant of Arabidopsis is associated with a reduction in polar auxin transport and diverse morphological defects. <i>Plant Cell</i> 9:745-757                               |
|           | BIG                                   |                       | BIG. Gil P, Dewey E, Friml J, Zhao Y, Snowden KC, Putterill J, Palme K, Estelle M, Chory J (2001) BIG: a calossin-like protein required for polar auxin transport in Arabidopsis. <i>Genes Dev</i> 15:1985-1997                                                                                                               |
| At3g13300 | VARICOSE (VCS)                        | Vasculature (WOL)     | VCS1. Deyholos MK, Cavaness GF, Hall B, King E, Punwani J, Van Norman J, Sieburth LE (2003) VARICOSE, a WD-domain protein, is required for leaf blade development. <i>Development</i> 130:6577-6588                                                                                                                           |
|           |                                       |                       | VCS1. Xu J, Yang JY, Niu QW, Chua NH (2006) Arabidopsis DCP2, DCP1, and VARICOSE form a decapping complex required for postembryonic development. <i>Plant Cell</i> 18:3386-3398                                                                                                                                              |
|           |                                       |                       | VCS1. Goeres DC, Van Norman JM, Zhang W, Fauver NA, Spencer ML, Sieburth LE (2007) Components of the Arabidopsis mRNA decapping complex are required for early seedling development. <i>Plant Cell</i> 19:1549-1564                                                                                                           |
| At4g03190 | AUXIN SIGNALING F BOX 1 (AFB1)        | Vasculature (WOL)     | AFB1. Dharmasiri N, Dharmasiri S, Weijers D, Lechner E, Yamada M, Hobbie L, Ehrismann JS, Jürgens G, Estelle M (2005) Plant development is regulated by a family of auxin receptor F box proteins. <i>Dev Cell</i> 9:109-119                                                                                                  |
| At1g70940 | PIN-FORMED 3 (PIN3)                   | Columella (PET111)    | PIN3. Friml J, Wiśniewska J, Benková E, Mendgen K, Palme K (2002) Lateral relocation of auxin efflux regulator PIN3 mediates tropism in Arabidopsis. <i>Nature</i> 415:806-809                                                                                                                                                |

**Supplementary Tables pertaining to Figure 1**

**Supplementary Table S6. Proteins of the root cellular proteome that lack RNA expression data**

| Locus     | Annotation                                                                                                                                                                                                                                                                                                                                                                                         | Root Hairs (COBL9) | Non-Hair Epidermis (WER) | Cortex (CORTEX) | Endodermis/ Quiescent (SCR) | Vasculature (WOL) | Columella (PET111) |
|-----------|----------------------------------------------------------------------------------------------------------------------------------------------------------------------------------------------------------------------------------------------------------------------------------------------------------------------------------------------------------------------------------------------------|--------------------|--------------------------|-----------------|-----------------------------|-------------------|--------------------|
| AT1G03230 | extracellular dermal glycoprotein, putative / EDGP, putative, similar to extracellular dermal glycoprotein EDGP precursor ( <i>Daucus carota</i> ) GI:285741                                                                                                                                                                                                                                       | 0                  | 1                        | 0               | 0                           | 0                 | 0                  |
| AT1G04910 | expressed protein, contains Pfam PF03138: Plant protein family. The function of this family of plant proteins is unknown; previously annotated as `growth regulator protein` based on similarity to axi 1 protein (GB:X80301) (GI:559920) from ( <i>Nicotiana tabacum</i> ), which, due to scientific fraud was retracted. Retraction in: Schell J. EMBO J 1999 May 17;18(10):2908. PMID:10400497. | 0                  | 1                        | 1               | 0                           | 1                 | 0                  |
| AT1G06220 | elongation factor Tu family protein, similar to <i>Cryptosporidium parvum</i> elongation factor-2 GB:U21667 GI:706974 from ( <i>Cryptosporidium parvum</i> )                                                                                                                                                                                                                                       | 1                  | 0                        | 0               | 0                           | 1                 | 0                  |
| AT1G07670 | calcium-transporting ATPase 4, endoplasmic reticulum-type (ECA4), identical to SP:Q9XES1 Calcium-transporting ATPase 4, endoplasmic reticulum-type (EC 3.6.3.8) ( <i>Arabidopsis thaliana</i> ); contains InterPro Accession IPR006069: Cation transporting ATPase                                                                                                                                 | 1                  | 1                        | 0               | 1                           | 1                 | 1                  |
| AT1G07810 | ECA1_ACA3_ATECA1__calcium-transporting ATPase 1, endoplasmic reticulum-type (ECA1), identical to SP:P92939 Calcium-transporting ATPase 1, endoplasmic reticulum-type (EC 3.6.3.8) ( <i>Arabidopsis thaliana</i> ); contains InterPro Accession                                                                                                                                                     | 1                  | 1                        | 1               | 0                           | 1                 | 0                  |

**Supplementary Tables pertaining to Figure 1**

**Supplementary Table S6. Proteins of the root cellular proteome that lack RNA expression data**

| Locus     | Annotation                                                                                                                                                                                                                                                                                                                                                                                                                       | Root Hairs (COBL9) | Non-Hair Epidermis (WER) | Cortex (CORTEX) | Endodermis/Quiescent (SCR) | Vasculature (WOL) | Columella (PET111) |
|-----------|----------------------------------------------------------------------------------------------------------------------------------------------------------------------------------------------------------------------------------------------------------------------------------------------------------------------------------------------------------------------------------------------------------------------------------|--------------------|--------------------------|-----------------|----------------------------|-------------------|--------------------|
|           | IPR006069: Cation transporting ATPase                                                                                                                                                                                                                                                                                                                                                                                            |                    |                          |                 |                            |                   |                    |
| AT1G08200 | AXS2_expressed protein                                                                                                                                                                                                                                                                                                                                                                                                           | 0                  | 0                        | 0               | 1                          | 1                 | 0                  |
| AT1G11680 | EMB1738_CYP51G1_CYP51_CYP51A2_obtusifoliol 14-demethylase (CYP51), identical to obtusifoliol 14-demethylase (GI:14624983) (Arabidopsis thaliana)                                                                                                                                                                                                                                                                                 | 1                  | 1                        | 1               | 1                          | 1                 | 0                  |
| AT1G13440 | glyceraldehyde 3-phosphate dehydrogenase, cytosolic, putative / NAD-dependent glyceraldehyde-3-phosphate dehydrogenase, putative, very strong similarity to SP:P25858 Glyceraldehyde 3-phosphate dehydrogenase, cytosolic (EC 1.2.1.12) {Arabidopsis thaliana}; contains Pfam profiles PF02800: Glyceraldehyde 3-phosphate dehydrogenase C-terminal domain, PF00044: Glyceraldehyde 3-phosphate dehydrogenase NAD binding domain | 0                  | 0                        | 0               | 0                          | 1                 | 1                  |
| AT1G14010 | emp24/gp25L/p24 family protein, similar to SP:P49755 Transmembrane protein Tmp21 precursor (21 kDa Transmembrane trafficking protein) {Homo sapiens}; contains Pfam profile PF01105: emp24/gp25L/p24 family                                                                                                                                                                                                                      | 0                  | 0                        | 0               | 0                          | 1                 | 1                  |
| AT1G16300 | glyceraldehyde 3-phosphate dehydrogenase, cytosolic, putative / NAD-dependent glyceraldehyde-3-phosphate dehydrogenase, putative, similar to glyceraldehyde-3-phosphate dehydrogenase (Pinus sylvestris) GI:1100223; contains Pfam profiles PF02800: Glyceraldehyde 3-phosphate                                                                                                                                                  | 1                  | 0                        | 0               | 0                          | 0                 | 0                  |

**Supplementary Tables pertaining to Figure 1**

**Supplementary Table S6. Proteins of the root cellular proteome that lack RNA expression data**

| Locus     | Annotation                                                                                                                                                                                                                                                                                                                                                                   | Root Hairs (COBL9) | Non-Hair Epidermis (WER) | Cortex (CORTEX) | Endodermis/ Quiescent (SCR) | Vasculature (WOL) | Columella (PET111) |
|-----------|------------------------------------------------------------------------------------------------------------------------------------------------------------------------------------------------------------------------------------------------------------------------------------------------------------------------------------------------------------------------------|--------------------|--------------------------|-----------------|-----------------------------|-------------------|--------------------|
|           | dehydrogenase C-terminal domain, PF00044: Glyceraldehyde 3-phosphate dehydrogenase NAD binding domain                                                                                                                                                                                                                                                                        |                    |                          |                 |                             |                   |                    |
| AT1G16700 | NADH-ubiquinone oxidoreductase 23 kDa subunit, mitochondrial, putative, very strong similarity to SP:Q42599 NADH-ubiquinone oxidoreductase 23 kDa subunit, mitochondrial precursor (EC 1.6.5.3) (EC 1.6.99.3) (Complex I-23KD) (CI-23KD) (Complex I- 28.5KD) (CI-28.5KD) { <i>Arabidopsis thaliana</i> }; contains Pfam profile PF00037: iron-sulfur cluster-binding protein | 0                  | 0                        | 0               | 1                           | 1                 | 1                  |
| AT1G16890 | ubiquitin-conjugating enzyme, putative, nearly identical to ubiquitin-conjugating enzyme E2 ( <i>Catharanthus roseus</i> ) GI:5381319; contains Pfam profile PF00179: Ubiquitin-conjugating enzyme                                                                                                                                                                           | 0                  | 0                        | 0               | 0                           | 1                 | 0                  |
| AT1G17745 | PGDH__D-3-phosphoglycerate dehydrogenase / 3-PGDH, identical to SP:O04130                                                                                                                                                                                                                                                                                                    | 1                  | 1                        | 0               | 0                           | 1                 | 0                  |
| AT1G23170 | expressed protein, Location of ESTs gb:AA395014, gb:T23026, gb:N65311 and gb:N37226; expression supported by MPSS                                                                                                                                                                                                                                                            | 1                  | 0                        | 0               | 0                           | 0                 | 0                  |
| AT1G30230 | elongation factor 1-beta / EF-1-beta, identical to SP:P48006 Elongation factor 1-beta (EF-1-beta) { <i>Arabidopsis thaliana</i> }                                                                                                                                                                                                                                            | 0                  | 0                        | 0               | 1                           | 1                 | 0                  |
| AT1G30450 | CCC1_ATCCC1__cation-chloride cotransporter, putative, similar to cation-chloride co-transporter GB:AAC49874 GI:2582381 from ( <i>Nicotiana tabacum</i> ), Cation-Chloride Cotransporter (CCC) Family Member, PMID:11500563                                                                                                                                                   | 1                  | 0                        | 0               | 0                           | 0                 | 0                  |

**Supplementary Tables pertaining to Figure 1**

**Supplementary Table S6. Proteins of the root cellular proteome that lack RNA expression data**

| Locus     | Annotation                                                                                                                                                                                                                                                                                        | Root Hairs (COBL9) | Non-Hair Epidermis (WER) | Cortex (CORTEX) | Endodermis/ Quiescent (SCR) | Vasculature (WOL) | Columella (PET111) |
|-----------|---------------------------------------------------------------------------------------------------------------------------------------------------------------------------------------------------------------------------------------------------------------------------------------------------|--------------------|--------------------------|-----------------|-----------------------------|-------------------|--------------------|
| AT1G31180 | 3-isopropylmalate dehydrogenase, chloroplast, putative, strong similarity to SP:P29102 3-isopropylmalate dehydrogenase, chloroplast precursor {Brassica napus}; EST gb:F14478 comes from this gene                                                                                                | 1                  | 1                        | 1               | 0                           | 1                 | 1                  |
| AT1G32380 | ribose-phosphate pyrophosphokinase 2 / phosphoribosyl diphosphate synthetase 2 (PRS2), identical to SP:Q42583 from (Arabidopsis thaliana); strong similarity to phosphoribosyl diphosphate synthetase 1 (ribose-phosphate pyrophosphokinase 1 (PRS I) (Arabidopsis thaliana) GI:633140, SP:Q42581 | 1                  | 1                        | 0               | 0                           | 0                 | 0                  |
| AT1G35160 | GRF4_GF14 PHI__14-3-3 protein GF14 phi (GRF4), identical to GF14 protein phi chain GI:1493805, SP:P46077 from (Arabidopsis thaliana)                                                                                                                                                              | 1                  | 0                        | 1               | 1                           | 1                 | 0                  |
| AT1G47600 | glycosyl hydrolase family 1 protein, contains Pfam PF00232 : Glycosyl hydrolase family 1 domain; TIGRFAM TIGR01233: 6-phospho-beta-galactosidase; similar to thioglucosidase (GI:871992) (Arabidopsis thaliana)                                                                                   | 0                  | 0                        | 0               | 0                           | 0                 | 1                  |
| AT1G47640 | expressed protein, similar to seven transmembrane domain protein GI:3550427 from (Homo sapiens)                                                                                                                                                                                                   | 0                  | 1                        | 1               | 0                           | 1                 | 1                  |
| AT1G48860 | 3-phosphoshikimate 1-carboxyvinyltransferase, putative / 5-enolpyruvylshikimate-3-phosphate, putative / EPSP synthase, putative, strong similarity to 5-enolpyruvylshikimate-3-phosphate                                                                                                          | 1                  | 0                        | 0               | 1                           | 0                 | 0                  |



**Supplementary Tables pertaining to Figure 1**

**Supplementary Table S6. Proteins of the root cellular proteome that lack RNA expression data**

| Locus     | Annotation                                                                                                                                                                                                                                                                 | Root Hairs (COBL9) | Non-Hair Epidermis (WER) | Cortex (CORTEX) | Endodermis/ Quiescent (SCR) | Vasculature (WOL) | Columella (PET111) |
|-----------|----------------------------------------------------------------------------------------------------------------------------------------------------------------------------------------------------------------------------------------------------------------------------|--------------------|--------------------------|-----------------|-----------------------------|-------------------|--------------------|
|           | (EPSP) synthase SP:P05466 from ( <i>Arabidopsis thaliana</i> )                                                                                                                                                                                                             |                    |                          |                 |                             |                   |                    |
| AT1G48900 | signal recognition particle 54 kDa protein 3 / SRP54 (SRP-54C), identical to SP:P49967 Signal recognition particle 54 kDa protein 3 (SRP54) { <i>Arabidopsis thaliana</i> }                                                                                                | 1                  | 0                        | 0               | 0                           | 0                 | 0                  |
| AT1G51630 | expressed protein, contains Pfam PF03138: Plant protein family. The function of this family of plant proteins is unknown;                                                                                                                                                  | 1                  | 1                        | 1               | 0                           | 1                 | 0                  |
| AT1G52780 | expressed protein                                                                                                                                                                                                                                                          | 1                  | 0                        | 1               | 0                           | 1                 | 0                  |
| AT1G54000 | myrosinase-associated protein, putative, similar to myrosinase-associated proteins GI:1769968, GI:1769970, GI:1216391, GI:1216389 from ( <i>Brassica napus</i> ); contains Pfam profile PF00657: GDSL-like Lipase/Acylhydrolase; contains 1 predicted transmembrane domain | 1                  | 1                        | 1               | 1                           | 1                 | 1                  |
| AT1G54010 | myrosinase-associated protein, putative, similar to myrosinase-associated protein GI:1769969 from ( <i>Brassica napus</i> ); contains Pfam profile PF00657: Lipase/Acylhydrolase with GDSL-like motif                                                                      | 1                  | 1                        | 1               | 0                           | 1                 | 1                  |
| AT1G54270 | EIF4A1_RH4_TIF4A1	EIF4A-2_eukaryotic translation initiation factor 4A-2 / eIF-4A-2, similar to eukaryotic translation initiation factor 4A GI:19696 from ( <i>Nicotiana plumbaginifolia</i> )                                                                              | 0                  | 0                        | 0               | 0                           | 1                 | 1                  |
| AT1G56190 | phosphoglycerate kinase, putative, similar to SP:P41758 Phosphoglycerate kinase, chloroplast precursor (EC                                                                                                                                                                 | 1                  | 1                        | 1               | 1                           | 1                 | 0                  |

**Supplementary Tables pertaining to Figure 1**

**Supplementary Table S6. Proteins of the root cellular proteome that lack RNA expression data**

| Locus     | Annotation                                                                                                                                                                                                           | Root Hairs (COBL9) | Non-Hair Epidermis (WER) | Cortex (CORTEX) | Endodermis/ Quiescent (SCR) | Vasculature (WOL) | Columella (PET111) |
|-----------|----------------------------------------------------------------------------------------------------------------------------------------------------------------------------------------------------------------------|--------------------|--------------------------|-----------------|-----------------------------|-------------------|--------------------|
|           | 2.7.2.3) {Chlamydomonas reinhardtii}; contains Pfam profile PF00162: phosphoglycerate kinase                                                                                                                         |                    |                          |                 |                             |                   |                    |
| AT1G56423 |                                                                                                                                                                                                                      | 1                  | 0                        | 0               | 1                           | 0                 | 0                  |
| AT1G56550 | expressed protein                                                                                                                                                                                                    | 1                  | 0                        | 0               | 0                           | 0                 | 0                  |
| AT1G57720 | elongation factor 1B-gamma, putative / eEF-1B gamma, putative, similar to elongation factor 1B gamma GI:3868758 from (Oryza sativa)                                                                                  | 1                  | 1                        | 1               | 1                           | 1                 | 1                  |
| AT1G65540 | calcium-binding EF hand family protein, similar to leucine zipper-EF-hand containing transmembrane protein 1 (Homo sapiens) GI:4235226; contains Pfam profile PF00036: EF hand                                       | 1                  | 0                        | 0               | 0                           | 0                 | 0                  |
| AT1G66270 | beta-glucosidase (PSR3.2), nearly identical to GI:2286069 from (Arabidopsis thaliana) (Plant Mol. Biol. 34 (1), 57-68 (1997)); similar to thioglucoside glucohydrolase (GI:984052) (Arabidopsis thaliana)            | 1                  | 1                        | 1               | 1                           | 1                 | 1                  |
| AT1G66280 | glycosyl hydrolase family 1 protein, contains Pfam PF00232 : Glycosyl hydrolase family 1 domain; TIGRFAM TIGR01233: 6-phospho-beta-galactosidase; similar to beta-glucosidase 1 (GI:12043529) (Arabidopsis thaliana) | 1                  | 1                        | 1               | 1                           | 1                 | 1                  |
| AT1G66580 | 60S ribosomal protein L10 (RPL10C), contains Pfam profile: PF00826: Ribosomal L10                                                                                                                                    | 1                  | 0                        | 0               | 0                           | 0                 | 0                  |
| AT1G69460 | emp24/gp25L/p24 family protein, similar to SP:Q28735 Transmembrane protein Tmp21 precursor (21 kDa Transmembrane trafficking protein) {Oryctolagus cuniculus}; contains Pfam                                         | 1                  | 1                        | 0               | 1                           | 1                 | 1                  |

**Supplementary Tables pertaining to Figure 1**

**Supplementary Table S6. Proteins of the root cellular proteome that lack RNA expression data**

| Locus     | Annotation                                                                                                                                                                                                                                                                                                                                                                                                                                            | Root Hairs (COBL9) | Non-Hair Epidermis (WER) | Cortex (CORTEX) | Endodermis/Quiescent (SCR) | Vasculature (WOL) | Columella (PET111) |
|-----------|-------------------------------------------------------------------------------------------------------------------------------------------------------------------------------------------------------------------------------------------------------------------------------------------------------------------------------------------------------------------------------------------------------------------------------------------------------|--------------------|--------------------------|-----------------|----------------------------|-------------------|--------------------|
|           | profile: PF01105: emp24/gp25L/p24 family                                                                                                                                                                                                                                                                                                                                                                                                              |                    |                          |                 |                            |                   |                    |
| AT1G70330 | ENT1,AT__equilibrative nucleoside transporter family protein, contains similarity to SWISS-PROT:Q14542 equilibrative nucleoside transporter 2 (Equilibrative nitrobenzylmercaptapurine riboside-insensitive nucleoside transporter, Equilibrative NBMPR-insensitive nucleoside transporter, Nucleoside transporter, ei-type, 36 kDa nucleolar protein HNP36, Hydrophobic nucleolar protein, 36 kDa, Delayed-early response protein 12) (Homo sapiens) | 1                  | 0                        | 1               | 0                          | 0                 | 0                  |
| AT1G70600 | 60S ribosomal protein L27A (RPL27aC), identical to 60S ribosomal protein L27A GB:P49637 (Arabidopsis thaliana)                                                                                                                                                                                                                                                                                                                                        | 1                  | 0                        | 1               | 1                          | 1                 | 1                  |
| AT1G76690 | OPR2__12-oxophytodienoate reductase (OPR2), identical to 12-oxophytodienoate reductase OPR2 GB:AAC78441 (Arabidopsis thaliana)                                                                                                                                                                                                                                                                                                                        | 1                  | 0                        | 0               | 0                          | 0                 | 0                  |
| AT1G78570 | RHM1__NAD-dependent epimerase/dehydratase family protein, similar to dTDP-glucose 4,6-dehydratase from Aneurinibacillus thermoaerophilus GI:16357461, RmlB from Leptospira borgpetersenii GI:4234803; contains Pfam profile PF01370 NAD dependent epimerase/dehydratase family                                                                                                                                                                        | 0                  | 0                        | 1               | 0                          | 1                 | 0                  |
| AT1G78850 | curculin-like (mannose-binding) lectin family protein, low similarity to ser/thr protein kinase from Zea mays                                                                                                                                                                                                                                                                                                                                         | 1                  | 0                        | 0               | 0                          | 1                 | 0                  |

**Supplementary Tables pertaining to Figure 1**

**Supplementary Table S6. Proteins of the root cellular proteome that lack RNA expression data**

| Locus     | Annotation                                                                                                                                                                                                          | Root Hairs (COBL9) | Non-Hair Epidermis (WER) | Cortex (CORTEX) | Endodermis/ Quiescent (SCR) | Vasculature (WOL) | Columella (PET111) |
|-----------|---------------------------------------------------------------------------------------------------------------------------------------------------------------------------------------------------------------------|--------------------|--------------------------|-----------------|-----------------------------|-------------------|--------------------|
|           | (GI:2598067); contains Pfam lectin (probable mannose binding) domain PF01453 but not the protein kinase domain of the <i>Z. mays</i> protein                                                                        |                    |                          |                 |                             |                   |                    |
| AT1G79930 | HSP91__heat shock protein, putative, contains Pfam profile: PF00012 Heat shock hsp70 proteins; similar to heat-shock proteins GB:CAA94389, GB:AAD55461 ( <i>Arabidopsis thaliana</i> )                              | 0                  | 0                        | 0               | 1                           | 0                 | 1                  |
| AT2G01410 | expressed protein                                                                                                                                                                                                   | 1                  | 1                        | 1               | 0                           | 1                 | 1                  |
| AT2G09990 | 40S ribosomal protein S16 (RPS16A), Same as GB:Q42340                                                                                                                                                               | 1                  | 0                        | 1               | 0                           | 1                 | 0                  |
| AT2G14720 | VSR-2__vacuolar sorting receptor, putative, identical to GB:U79960 GI:1737220; contains a calcium-binding EGF-like domain signature                                                                                 | 1                  | 0                        | 1               | 0                           | 0                 | 1                  |
| AT2G19160 | expressed protein, contains Pfam profile PF03267: Arabidopsis protein of unknown function, DUF266                                                                                                                   | 1                  | 0                        | 0               | 0                           | 0                 | 0                  |
| AT2G21250 | mannose 6-phosphate reductase (NADPH-dependent), putative, 6-phosphate reductase ( <i>Apium graveolens</i> )(GI:1835701), NADP-dependent D-sorbitol-6-phosphate dehydrogenase ( <i>Malus domestica</i> )(SP:P28475) | 1                  | 0                        | 0               | 0                           | 0                 | 0                  |
| AT2G22795 | expressed protein                                                                                                                                                                                                   | 1                  | 1                        | 1               | 0                           | 1                 | 1                  |
| AT2G22970 | SCPL11__serine carboxypeptidase S10 family protein, similar to serine carboxypeptidase I precursor (SP:P37890) ( <i>Oryza sativa</i> )                                                                              | 1                  | 0                        | 0               | 0                           | 0                 | 0                  |
| AT2G23370 | expressed protein                                                                                                                                                                                                   | 0                  | 1                        | 0               | 0                           | 0                 | 0                  |
| AT2G26640 | beta-ketoacyl-CoA synthase, putative, similar to beta-ketoacyl-CoA synthase ( <i>Simmondsia chinensis</i> )(GI:1045614)                                                                                             | 1                  | 0                        | 1               | 0                           | 0                 | 0                  |

**Supplementary Tables pertaining to Figure 1**

**Supplementary Table S6. Proteins of the root cellular proteome that lack RNA expression data**

| Locus     | Annotation                                                                                                                                                                                                                                                                          | Root Hairs (COBL9) | Non-Hair Epidermis (WER) | Cortex (CORTEX) | Endodermis/ Quiescent (SCR) | Vasculature (WOL) | Columella (PET111) |
|-----------|-------------------------------------------------------------------------------------------------------------------------------------------------------------------------------------------------------------------------------------------------------------------------------------|--------------------|--------------------------|-----------------|-----------------------------|-------------------|--------------------|
| AT2G30870 | ATGSTF10_ATGSTF4_ERD13__ glutathione S-transferase, putative, supported by cDNA GI:443698 GB:D17673                                                                                                                                                                                 | 1                  | 1                        | 1               | 1                           | 1                 | 0                  |
| AT2G30950 | VAR2_FTSH2__FtsH protease (VAR2), identical to zinc dependent protease VAR2 GI:7650138 from (Arabidopsis thaliana)                                                                                                                                                                  | 0                  | 0                        | 0               | 0                           | 0                 | 1                  |
| AT2G31140 | expressed protein                                                                                                                                                                                                                                                                   | 1                  | 0                        | 0               | 0                           | 1                 | 1                  |
| AT2G37170 | PIP2B_PIP2;2__plasma membrane intrinsic protein 2B (PIP2B) / aquaporin PIP2.2 (PIP2.2), identical to SP:P43287 Plasma membrane intrinsic protein 2B {Arabidopsis thaliana}                                                                                                          | 1                  | 0                        | 1               | 1                           | 1                 | 0                  |
| AT2G37230 | pentatricopeptide (PPR) repeat-containing protein, contains Pfam profile PF01535: PPR repeat                                                                                                                                                                                        | 1                  | 1                        | 1               | 0                           | 1                 | 0                  |
| AT2G38230 | ATPDX1.1__Encodes a protein predicted to function in tandem with PDX2 to form glutamine amidotransferase complex with involved in vitamin B6 biosynthesis.                                                                                                                          | 0                  | 0                        | 0               | 0                           | 0                 | 1                  |
| AT2G38840 | guanylate-binding family protein, similar to SP:Q01514 Interferon-induced guanylate-binding protein 1 (Guanine nucleotide-binding protein 1) (Interferon-gamma inducible protein MAG-1) {Mus musculus}; contains Pfam profile PF02263: Guanylate-binding protein, N-terminal domain | 0                  | 1                        | 1               | 0                           | 0                 | 0                  |
| AT2G39800 | P5CS1_ATP5CS__delta 1-pyrroline-5-carboxylate synthetase A / P5CS A (P5CS1), identical to SP:P54887:P5C1_ARATH                                                                                                                                                                      | 0                  | 0                        | 1               | 0                           | 0                 | 0                  |
| AT2G40380 | prenylated rab acceptor (PRA1) family protein, contains Pfam profile PF03208:                                                                                                                                                                                                       | 0                  | 0                        | 0               | 0                           | 1                 | 1                  |

**Supplementary Tables pertaining to Figure 1**

**Supplementary Table S6. Proteins of the root cellular proteome that lack RNA expression data**

| Locus     | Annotation                                                                                                                                                                                                                                                                                                             | Root Hairs (COBL9) | Non-Hair Epidermis (WER) | Cortex (CORTEX) | Endodermis/ Quiescent (SCR) | Vasculature (WOL) | Columella (PET111) |
|-----------|------------------------------------------------------------------------------------------------------------------------------------------------------------------------------------------------------------------------------------------------------------------------------------------------------------------------|--------------------|--------------------------|-----------------|-----------------------------|-------------------|--------------------|
|           | Prenylated rab acceptor (PRA1)                                                                                                                                                                                                                                                                                         |                    |                          |                 |                             |                   |                    |
| AT2G40510 | 40S ribosomal protein S26 (RPS26A)                                                                                                                                                                                                                                                                                     | 1                  | 0                        | 0               | 0                           | 1                 | 0                  |
| AT2G41150 | expressed protein, an isoform contains a GA donor splice site supported by FL-cDNA alignment which truncates the ORF.                                                                                                                                                                                                  | 0                  | 0                        | 1               | 0                           | 0                 | 0                  |
| AT2G41475 |                                                                                                                                                                                                                                                                                                                        | 1                  | 0                        | 0               | 0                           | 1                 | 0                  |
| AT2G41770 | expressed protein, contains Pfam domain PF03385: Protein of unknown function, DUF288                                                                                                                                                                                                                                   | 1                  | 0                        | 1               | 0                           | 1                 | 0                  |
| AT2G45030 | mitochondrial elongation factor, putative, similar to SP:P25039 Elongation factor G 1, mitochondrial precursor (mEF-G-1) {Saccharomyces cerevisiae}; contains Pfam profiles PF00009: Elongation factor Tu GTP binding domain, PF03764: Elongation factor G domain IV, PF00679: Elongation factor G C-terminus          | 0                  | 1                        | 0               | 0                           | 1                 | 0                  |
| AT2G45300 | 3-phosphoshikimate 1-carboxyvinyltransferase / 5-enolpyruvylshikimate-3-phosphate / EPSP synthase, nearly identical to SP:P05466                                                                                                                                                                                       | 1                  | 1                        | 0               | 1                           | 1                 | 0                  |
| AT2G46280 | TRIP-1_TIF311__eukaryotic translation initiation factor 3 subunit 2 / TGF-beta receptor interacting protein 1 / eIF-3 beta / eIF3i / TRIP-1 (TIF311), identical to eukaryotic translation initiation factor 3 subunit 2 (SP:Q38884) {Arabidopsis thaliana}; contains Pfam PF00400: WD domain, G-beta repeat (5 copies) | 1                  | 0                        | 0               | 1                           | 1                 | 0                  |
| AT2G47380 | cytochrome c oxidase subunit Vc family protein / COX5C family protein, contains Pfam profile: PF05799                                                                                                                                                                                                                  | 0                  | 0                        | 0               | 0                           | 0                 | 1                  |

**Supplementary Tables pertaining to Figure 1**

**Supplementary Table S6. Proteins of the root cellular proteome that lack RNA expression data**

| Locus     | Annotation                                                                                                                                                                                                                                                                             | Root Hairs (COBL9) | Non-Hair Epidermis (WER) | Cortex (CORTEX) | Endodermis/Quiescent (SCR) | Vasculature (WOL) | Columella (PET111) |
|-----------|----------------------------------------------------------------------------------------------------------------------------------------------------------------------------------------------------------------------------------------------------------------------------------------|--------------------|--------------------------|-----------------|----------------------------|-------------------|--------------------|
|           | cytochrome c oxidase subunit Vc (COX5C)                                                                                                                                                                                                                                                |                    |                          |                 |                            |                   |                    |
| AT2G47510 | FUM1__fumarate hydratase, putative / fumarase, putative, similar to SP:P55250 Fumarate hydratase, mitochondrial precursor (EC 4.2.1.2) (Fumarase) {Rhizopus oryzae}; contains Pfam profile PF00206: Lyase                                                                              | 1                  | 1                        | 1               | 1                          | 1                 | 1                  |
| AT3G04120 | GAPC__glyceraldehyde-3-phosphate dehydrogenase, cytosolic (GAPC) / NAD-dependent glyceraldehyde-3-phosphate dehydrogenase, identical to SP:P25858 Glyceraldehyde 3-phosphate dehydrogenase, cytosolic (EC 1.2.1.12) {Arabidopsis thaliana}                                             | 0                  | 1                        | 0               | 1                          | 0                 | 1                  |
| AT3G06810 | acyl-CoA dehydrogenase-related, low similarity to acyl-CoA dehydrogenase (Acinetobacter sp. NCIMB9871) GI:14587418; contains Pfam profiles PF01636: Phosphotransferase enzyme family, PF00441: Acyl-CoA dehydrogenase C-terminal domain, PF02770: Acyl-CoA dehydrogenase middle domain | 1                  | 1                        | 0               | 0                          | 0                 | 1                  |
| AT3G07290 | pentatricopeptide (PPR) repeat-containing protein, contains Pfam profile: PF01535: PPR repeat                                                                                                                                                                                          | 0                  | 0                        | 1               | 0                          | 0                 | 0                  |
| AT3G08530 | clathrin heavy chain, putative, similar to Swiss-Prot:Q00610 clathrin heavy chain 1 (CLH-17) (Homo sapiens)                                                                                                                                                                            | 1                  | 0                        | 1               | 0                          | 1                 | 1                  |
| AT3G09410 | pectinacetylerase family protein, similar to pectinacetylerase precursor GB:CAA67728 (Vigna radiata); contains Pfam profile: PF03283 pectinacetylerase                                                                                                                                 | 0                  | 0                        | 1               | 0                          | 0                 | 0                  |

**Supplementary Tables pertaining to Figure 1**

**Supplementary Table S6. Proteins of the root cellular proteome that lack RNA expression data**

| Locus     | Annotation                                                                                                                                                                                                                                                                                                     | Root Hairs (COBL9) | Non-Hair Epidermis (WER) | Cortex (CORTEX) | Endodermis/Quiescent (SCR) | Vasculature (WOL) | Columella (PET111) |
|-----------|----------------------------------------------------------------------------------------------------------------------------------------------------------------------------------------------------------------------------------------------------------------------------------------------------------------|--------------------|--------------------------|-----------------|----------------------------|-------------------|--------------------|
| AT3G09630 | 60S ribosomal protein L4/L1 (RPL4A), strong similarity to 60S ribosomal protein L1 GB:P49691                                                                                                                                                                                                                   | 1                  | 0                        | 0               | 1                          | 1                 | 0                  |
| AT3G11070 | outer membrane OMP85 family protein, contains Pfam profile PF01103: outer membrane protein, OMP85 family                                                                                                                                                                                                       | 1                  | 0                        | 1               | 0                          | 1                 | 1                  |
| AT3G11130 | clathrin heavy chain, putative, similar to Swiss-Prot:Q00610 clathrin heavy chain 1 (CLH-17) (Homo sapiens)                                                                                                                                                                                                    | 1                  | 1                        | 1               | 1                          | 1                 | 1                  |
| AT3G11170 | FAD7_FADD__omega-3 fatty acid desaturase, chloroplast (FAD7) (FADD), identical to omega-3 fatty acid desaturase, chloroplast precursor SP:P46310 (Arabidopsis thaliana (Mouse-ear cress)); identical to Pfam profile PF00487: Fatty acid desaturase; identical to cDNA plastid fatty acid desaturase GI:809491 | 1                  | 0                        | 0               | 0                          | 0                 | 0                  |
| AT3G11940 | ATRPS5A_AML1__40S ribosomal protein S5 (RPS5B), similar to 40S ribosomal protein S5 GB:AAC98068 GI:4056502 from (Arabidopsis thaliana)                                                                                                                                                                         | 0                  | 1                        | 0               | 1                          | 0                 | 1                  |
| AT3G12800 | short-chain dehydrogenase/reductase (SDR) family protein, contains Pfam profile PF00106:oxidoreductase, short chain dehydrogenase/reductase family                                                                                                                                                             | 1                  | 0                        | 1               | 0                          | 0                 | 0                  |
| AT3G13300 | VCS__transducin family protein / WD-40 repeat family protein, contains 2 WD-40 repeats (PF00400); autoantigen locus HUMAUTANT (GI:533202) (Homo sapiens) and autoantigen locus HSU17474 (GI:596134) (Homo sapiens)                                                                                             | 0                  | 0                        | 0               | 0                          | 1                 | 0                  |
| AT3G13530 | MAPKKK7__MAP3K epsilon protein kinase, identical to MAP3K epsilon                                                                                                                                                                                                                                              | 0                  | 1                        | 0               | 0                          | 0                 | 0                  |



**Supplementary Tables pertaining to Figure 1**

**Supplementary Table S6. Proteins of the root cellular proteome that lack RNA expression data**

| Locus     | Annotation                                                                                                                                                                                                                                                                                                                  | Root Hairs (COBL9) | Non-Hair Epidermis (WER) | Cortex (CORTEX) | Endodermis/ Quiescent (SCR) | Vasculature (WOL) | Columella (PET111) |
|-----------|-----------------------------------------------------------------------------------------------------------------------------------------------------------------------------------------------------------------------------------------------------------------------------------------------------------------------------|--------------------|--------------------------|-----------------|-----------------------------|-------------------|--------------------|
|           | protein kinase ( <i>Arabidopsis thaliana</i> )<br>gi:3549652;emb:CAA12272                                                                                                                                                                                                                                                   |                    |                          |                 |                             |                   |                    |
| AT3G13920 | EIF4A1_RH4_TIF4A1	EIF4A-2__eukaryotic translation initiation factor 4A-1 / eIF-4A-1, eIF-4A-1<br>gi:15293046, gi:15450485; contains Pfam profile PF00270: DEAD/DEAH box helicase; contains Pfam profile PF00271: Helicase conserved C-terminal domain                                                                       | 1                  | 0                        | 1               | 1                           | 1                 | 1                  |
| AT3G14390 | diaminopimelate decarboxylase, putative / DAP carboxylase, putative, similar to diaminopimelate decarboxylase ( <i>Arabidopsis thaliana</i> )<br>GI:6562332; contains Pfam profiles PF02784: Pyridoxal-dependent decarboxylase pyridoxal binding domain, PF00278: Pyridoxal-dependent decarboxylase C-terminal sheet domain | 1                  | 1                        | 0               | 0                           | 0                 | 0                  |
| AT3G16400 | ATMLP-470__jacalin lectin family protein, similar to myrosinase-binding protein homolog ( <i>Arabidopsis thaliana</i> )<br>GI:2997767, epithiospecifier ( <i>Arabidopsis thaliana</i> ) GI:16118845; contains Pfam profiles PF01419 jacalin-like lectin family, PF01344 Kelch motif                                         | 0                  | 0                        | 0               | 0                           | 1                 | 0                  |
| AT3G16410 | jacalin lectin family protein, similar to myrosinase-binding protein homolog ( <i>Arabidopsis thaliana</i> ) GI:2997767, epithiospecifier ( <i>Arabidopsis thaliana</i> )<br>GI:16118845; contains Pfam profiles PF01419 jacalin-like lectin family, PF01344 Kelch motif                                                    | 1                  | 1                        | 0               | 0                           | 1                 | 1                  |
| AT3G16420 | PBP1__jacalin lectin family protein, similar to myrosinase binding protein                                                                                                                                                                                                                                                  | 1                  | 1                        | 1               | 0                           | 1                 | 1                  |

**Supplementary Tables pertaining to Figure 1**

**Supplementary Table S6. Proteins of the root cellular proteome that lack RNA expression data**

| Locus     | Annotation                                                                                                                                                                                                                                                                                                                                                                                          | Root Hairs (COBL9) | Non-Hair Epidermis (WER) | Cortex (CORTEX) | Endodermis/Quiescent (SCR) | Vasculature (WOL) | Columella (PET111) |
|-----------|-----------------------------------------------------------------------------------------------------------------------------------------------------------------------------------------------------------------------------------------------------------------------------------------------------------------------------------------------------------------------------------------------------|--------------------|--------------------------|-----------------|----------------------------|-------------------|--------------------|
|           | (Brassica napus) GI:1711296; contains Pfam profile: PF01419 jacalin-like lectin domain                                                                                                                                                                                                                                                                                                              |                    |                          |                 |                            |                   |                    |
| AT3G16430 | jacalin lectin family protein, similar to myrosinase binding protein (Brassica napus) GI:1711296; contains Pfam profile PF01419 jacalin-like lectin domain                                                                                                                                                                                                                                          | 1                  | 1                        | 0               | 0                          | 0                 | 1                  |
| AT3G17390 | MTO3_SAMS3__S-adenosylmethionine synthetase, putative, similar to S-adenosylmethionine synthetase 2 (Methionine adenosyltransferase 2, AdoMet synthetase 2) (Catharanthus roseus) SWISS-PROT:Q96552                                                                                                                                                                                                 | 1                  | 1                        | 1               | 0                          | 1                 | 1                  |
| AT3G17970 | chloroplast outer membrane translocon subunit, putative, similar to Toc64 (Pisum sativum) GI:7453538; contains Pfam profile PF00515 TPR Domain                                                                                                                                                                                                                                                      | 1                  | 1                        | 0               | 1                          | 0                 | 0                  |
| AT3G18000 | NMT1__phosphoethanolamine N-methyltransferase 1 / PEAMT 1 (NMT1), identical to Phosphoethanolamine N-methyltransferase 1 (EC 2.1.1.103) (PEAMT 1) (AtNMT1) (SP:Q9FR44){Arabidopsis thaliana}; strong similarity to phosphoethanolamine N-methyltransferase from (Spinacia oleracea) GI:7407189, (Triticum aestivum) GI:17887465; contains Pfam profile PF01209: methyltransferase, UbiE/COQ5 family | 0                  | 0                        | 1               | 0                          | 0                 | 1                  |
| AT3G18240 | expressed protein                                                                                                                                                                                                                                                                                                                                                                                   | 0                  | 1                        | 1               | 0                          | 0                 | 0                  |
| AT3G18410 | NADH-ubiquinone oxidoreductase-related, similar to NADH-ubiquinone                                                                                                                                                                                                                                                                                                                                  | 1                  | 0                        | 1               | 0                          | 0                 | 0                  |

**Supplementary Tables pertaining to Figure 1**

**Supplementary Table S6. Proteins of the root cellular proteome that lack RNA expression data**

| Locus     | Annotation                                                                                                                                                                                                                                                                                          | Root Hairs (COBL9) | Non-Hair Epidermis (WER) | Cortex (CORTEX) | Endodermis/ Quiescent (SCR) | Vasculature (WOL) | Columella (PET111) |
|-----------|-----------------------------------------------------------------------------------------------------------------------------------------------------------------------------------------------------------------------------------------------------------------------------------------------------|--------------------|--------------------------|-----------------|-----------------------------|-------------------|--------------------|
|           | oxidoreductase 12 kDa subunit, mitochondrial precursor (EC 1.6.5.3) (EC 1.6.99.3) (Complex I-12KD) (CI-12KD). (Swiss-Prot:Q03015) ( <i>Neurospora crassa</i> )                                                                                                                                      |                    |                          |                 |                             |                   |                    |
| AT3G18580 | single-strand-binding family protein, contains Pfam domain PF00436: Single-strand binding protein family                                                                                                                                                                                            | 1                  | 0                        | 0               | 0                           | 1                 | 0                  |
| AT3G19508 |                                                                                                                                                                                                                                                                                                     | 1                  | 0                        | 0               | 0                           | 0                 | 0                  |
| AT3G22290 | expressed protein                                                                                                                                                                                                                                                                                   | 1                  | 0                        | 1               | 0                           | 1                 | 0                  |
| AT3G22330 | DEAD box RNA helicase, putative, similar to RNA helicases GI:3775995, GI:3775987 from ( <i>Arabidopsis thaliana</i> ); contains Pfam profiles PF00270: DEAD/DEAH box helicase, PF00271: Helicase conserved C-terminal domain                                                                        | 0                  | 0                        | 0               | 1                           | 1                 | 0                  |
| AT3G23180 | lesion inducing protein-related, similar to ORF, able to induce HR-like lesions ( <i>Nicotiana tabacum</i> )                                                                                                                                                                                        | 1                  | 1                        | 0               | 0                           | 0                 | 1                  |
| AT3G23510 | cyclopropane fatty acid synthase, putative / CPA-FA synthase, putative, similar to cyclopropane synthase ( <i>Sterculia foetida</i> ) GI:21069167; contains Pfam profile PF02353: Cyclopropane-fatty-acyl-phospholipid synthase                                                                     | 1                  | 0                        | 0               | 0                           | 0                 | 0                  |
| AT3G28710 | H <sup>+</sup> -transporting two-sector ATPase, putative, similar to SP:P54641 Vacuolar ATP synthase subunit d (EC 3.6.3.14) (Vacuolar proton pump d subunit) (V-ATPase 41 kDa accessory protein) ( <i>Dictyostelium discoideum</i> ); contains Pfam profile PF01992: ATP synthase (C/AC39) subunit | 1                  | 0                        | 1               | 1                           | 1                 | 0                  |
| AT3G28715 | H <sup>+</sup> -transporting two-sector ATPase,                                                                                                                                                                                                                                                     | 1                  | 1                        | 1               | 1                           | 1                 | 1                  |

**Supplementary Tables pertaining to Figure 1**

**Supplementary Table S6. Proteins of the root cellular proteome that lack RNA expression data**

| Locus     | Annotation                                                                                                                                                                                                                                                                                                                          | Root Hairs (COBL9) | Non-Hair Epidermis (WER) | Cortex (CORTEX) | Endodermis/ Quiescent (SCR) | Vasculature (WOL) | Columella (PET111) |
|-----------|-------------------------------------------------------------------------------------------------------------------------------------------------------------------------------------------------------------------------------------------------------------------------------------------------------------------------------------|--------------------|--------------------------|-----------------|-----------------------------|-------------------|--------------------|
|           | putative, similar to SP:P54641 Vacuolar ATP synthase subunit d (EC 3.6.3.14) (Vacuolar proton pump d subunit) (V-ATPase 41 KDa accessory protein) { <i>Dictyostelium discoideum</i> }; contains Pfam profile PF01992: ATP synthase (C/AC39) subunit                                                                                 |                    |                          |                 |                             |                   |                    |
| AT3G32980 | peroxidase 32 (PER32) (P32) (PRXR3), identical to SP:Q9LHB9 Peroxidase 32 precursor (EC 1.11.1.7) (Atperox P32) (PRXR3) (ATP16a) { <i>Arabidopsis thaliana</i> }                                                                                                                                                                    | 0                  | 0                        | 0               | 1                           | 0                 | 0                  |
| AT3G44160 | chloroplast outer membrane protein-related, low similarity to chloroplastic outer envelope membrane protein (OEP75) ( <i>Pisum sativum</i> ) GI:633607                                                                                                                                                                              | 0                  | 1                        | 0               | 0                           | 0                 | 0                  |
| AT3G44310 | ATNIT1_NIT1__The protein undergoes thiolation following treatment with the oxidant tert-butylhydroperoxide.                                                                                                                                                                                                                         | 0                  | 0                        | 1               | 0                           | 0                 | 0                  |
| AT3G47960 | proton-dependent oligopeptide transport (POT) family protein, contains Pfam profile: PF00854 POT family                                                                                                                                                                                                                             | 0                  | 0                        | 1               | 0                           | 0                 | 0                  |
| AT3G48340 | similar to cysteine proteinase, putative [ <i>Arabidopsis thaliana</i> ] (TAIR:At3g48350.1); similar to cysteine proteinase [ <i>Glycine max</i> ] (GB:BAC77522.1); contains InterPro domain Papain cysteine protease (C1) (InterPro:IPR000668); contains InterPro domain Eukaryotic thiol (cysteine) protease (InterPro:IPR000169) | 1                  | 1                        | 1               | 0                           | 1                 | 1                  |
| AT3G48680 | bacterial transferase hexapeptide repeat-containing protein, contains Pfam profile PF00132: Bacterial transferase hexapeptide (four repeats);                                                                                                                                                                                       | 1                  | 0                        | 1               | 0                           | 0                 | 1                  |

**Supplementary Tables pertaining to Figure 1**

**Supplementary Table S6. Proteins of the root cellular proteome that lack RNA expression data**

| Locus     | Annotation                                                                                                                                                                                                                                                                                                                   | Root Hairs (COBL9) | Non-Hair Epidermis (WER) | Cortex (CORTEX) | Endodermis/Quiescent (SCR) | Vasculature (WOL) | Columella (PET111) |
|-----------|------------------------------------------------------------------------------------------------------------------------------------------------------------------------------------------------------------------------------------------------------------------------------------------------------------------------------|--------------------|--------------------------|-----------------|----------------------------|-------------------|--------------------|
|           | ferripyochelin binding protein - Methanobacterium thermoautotrophicum, EMBL:AE000918.1                                                                                                                                                                                                                                       |                    |                          |                 |                            |                   |                    |
| AT3G48870 | ATHSP93-III_HSP93-III_ATCLPC__Similar to ATP-dependent Clp protease ATP-binding subunit (ClpC), identical to AtClpC GI:5360574 from (Arabidopsis thaliana); contains Pfam profiles PF02861: Clp amino terminal domain and PF02151: UvrB/uvrC motif. May function redundantly with TIC complex in chloroplast protein import. | 0                  | 1                        | 1               | 1                          | 1                 | 0                  |
| AT3G49080 | ribosomal protein S9 family protein, contains Pfam profile PF00380: ribosomal protein S9                                                                                                                                                                                                                                     | 1                  | 0                        | 0               | 0                          | 1                 | 0                  |
| AT3G51980 | expressed protein                                                                                                                                                                                                                                                                                                            | 1                  | 0                        | 0               | 0                          | 0                 | 0                  |
| AT3G52640 | nicastrin-related, contains weak similarity to Nicastrin precursor (Swiss-Prot:Q92542) (Homo sapiens)                                                                                                                                                                                                                        | 1                  | 0                        | 0               | 0                          | 0                 | 0                  |
| AT3G54470 | uridine 5'-monophosphate synthase / UMP synthase (PYRE-F) (UMPS), identical to SP:Q42586 Uridine 5'-monophosphate synthase (UMP synthase) (Includes: Orotate phosphoribosyltransferase (EC 2.4.2.10) (OPRtase); Orotidine 5'-phosphate decarboxylase (EC 4.1.1.23) (OMPdecase)) {Arabidopsis thaliana}                       | 0                  | 0                        | 0               | 0                          | 1                 | 0                  |
| AT3G55610 | delta 1-pyrroline-5-carboxylate synthetase B / P5CS B (P5CS2), identical to SP:P54888                                                                                                                                                                                                                                        | 0                  | 0                        | 1               | 0                          | 0                 | 0                  |
| AT3G59890 | dihydrodipicolinate reductase family protein, weak similarity to SP:Q52419                                                                                                                                                                                                                                                   | 0                  | 0                        | 0               | 0                          | 1                 | 0                  |

**Supplementary Tables pertaining to Figure 1**

**Supplementary Table S6. Proteins of the root cellular proteome that lack RNA expression data**

| Locus     | Annotation                                                                                                                                                                                                                                                                                                                                        | Root Hairs (COBL9) | Non-Hair Epidermis (WER) | Cortex (CORTEX) | Endodermis/Quiescent (SCR) | Vasculature (WOL) | Columella (PET111) |
|-----------|---------------------------------------------------------------------------------------------------------------------------------------------------------------------------------------------------------------------------------------------------------------------------------------------------------------------------------------------------|--------------------|--------------------------|-----------------|----------------------------|-------------------|--------------------|
|           | Dihydrodipicolinate reductase (EC 1.3.1.26) (DHPR) { <i>Pseudomonas syringae</i> }; contains Pfam profiles PF01113: Dihydrodipicolinate reductase N-terminus, PF05173: Dihydrodipicolinate reductase C-terminus                                                                                                                                   |                    |                          |                 |                            |                   |                    |
| AT3G59970 | MTHFR1__methylenetetrahydrofolate reductase 1 (MTHFR1), identical to methylenetetrahydrofolate reductase MTHFR1 ( <i>Arabidopsis thaliana</i> ) GI:5911425                                                                                                                                                                                        | 1                  | 0                        | 0               | 1                          | 0                 | 0                  |
| AT3G61520 | pentatricopeptide (PPR) repeat-containing protein, contains Pfam profile PF01535: PPR repeat                                                                                                                                                                                                                                                      | 1                  | 0                        | 0               | 0                          | 0                 | 0                  |
| AT3G62530 | PBS lyase HEAT-like repeat-containing protein, contains Pfam profile: PF03130 PBS lyase HEAT-like repeat                                                                                                                                                                                                                                          | 1                  | 0                        | 0               | 0                          | 1                 | 1                  |
| AT3G62830 | AUD1_UXS2_ATUXS2__NAD-dependent epimerase/dehydratase family protein, similar to UDP-glucuronic acid decarboxylase Uxs1p from <i>Filobasidiella neoformans</i> GI:14318327; contains Pfam profile PF01370 NAD dependent epimerase/dehydratase family; contains non-consensus CA donor splice site at exon 1 and TA acceptor splice site at exon 2 | 1                  | 1                        | 1               | 1                          | 1                 | 1                  |
| AT3G66654 | peptidyl-prolyl cis-trans isomerase cyclophilin-type family protein, contains Pfam domain, PF00160: peptidyl-prolyl cis-trans isomerase, cyclophilin-type                                                                                                                                                                                         | 1                  | 0                        | 1               | 0                          | 1                 | 0                  |
| AT4G00290 | mechanosensitive ion channel domain-containing protein / MS ion channel domain-containing protein, weak                                                                                                                                                                                                                                           | 1                  | 0                        | 0               | 0                          | 0                 | 0                  |

**Supplementary Tables pertaining to Figure 1**

**Supplementary Table S6. Proteins of the root cellular proteome that lack RNA expression data**

| Locus     | Annotation                                                                                                                                                                                                                                                                                                                                                                                                                                                                                                                   | Root Hairs (COBL9) | Non-Hair Epidermis (WER) | Cortex (CORTEX) | Endodermis/Quiescent (SCR) | Vasculature (WOL) | Columella (PET111) |
|-----------|------------------------------------------------------------------------------------------------------------------------------------------------------------------------------------------------------------------------------------------------------------------------------------------------------------------------------------------------------------------------------------------------------------------------------------------------------------------------------------------------------------------------------|--------------------|--------------------------|-----------------|----------------------------|-------------------|--------------------|
|           | similarity to SP:P77338 Potassium efflux system kefA {Escherichia coli}; contains Pfam profile PF00924: Mechanosensitive ion channel                                                                                                                                                                                                                                                                                                                                                                                         |                    |                          |                 |                            |                   |                    |
| AT4G00620 | tetrahydrofolate dehydrogenase/cyclohydrolase, putative, similar to SP:P07245 C-1-tetrahydrofolate synthase, cytoplasmic (C1-THF synthase) (Includes: Methylenetetrahydrofolate dehydrogenase (EC 1.5.1.5); Methenyltetrahydrofolate cyclohydrolase (EC 3.5.4.9); Formyltetrahydrofolate synthetase (EC 6.3.4.3)) {Saccharomyces cerevisiae}; contains Pfam profiles PF02882: Tetrahydrofolate dehydrogenase/cyclohydrolase, NAD(P)-binding domain, PF00763: Tetrahydrofolate dehydrogenase/cyclohydrolase, catalytic domain | 1                  | 1                        | 0               | 0                          | 0                 | 0                  |
| AT4G01660 | ABC1At_ATATH10__ABC1 family protein, contains Pfam domain, PF03109: ABC1 family                                                                                                                                                                                                                                                                                                                                                                                                                                              | 1                  | 0                        | 0               | 0                          | 0                 | 0                  |
| AT4G01750 | expressed protein, T15B16.8                                                                                                                                                                                                                                                                                                                                                                                                                                                                                                  | 0                  | 0                        | 0               | 0                          | 0                 | 1                  |
| AT4G03190 | GRH1_ATGER1_ATGRH1__F-box family protein (FBL18), almost identical to GRR1-like protein 1 GI:12658970 from (Arabidopsis thaliana); similar to leucine-rich repeats containing F-box protein FBL3 (GI:5919219) (Homo sapiens); similar to F-box protein FBL2 (GI:6063090) (Homo sapiens)                                                                                                                                                                                                                                      | 0                  | 0                        | 0               | 0                          | 1                 | 0                  |
| AT4G08520 | clathrin adaptor complex small chain                                                                                                                                                                                                                                                                                                                                                                                                                                                                                         | 0                  | 0                        | 0               | 0                          | 1                 | 0                  |

**Supplementary Tables pertaining to Figure 1**

**Supplementary Table S6. Proteins of the root cellular proteome that lack RNA expression data**

| Locus     | Annotation                                                                                                                                                                                                                                                                                      | Root Hairs (COBL9) | Non-Hair Epidermis (WER) | Cortex (CORTEX) | Endodermis/ Quiescent (SCR) | Vasculature (WOL) | Columella (PET111) |
|-----------|-------------------------------------------------------------------------------------------------------------------------------------------------------------------------------------------------------------------------------------------------------------------------------------------------|--------------------|--------------------------|-----------------|-----------------------------|-------------------|--------------------|
|           | family protein, contains Pfam profile: PF01217 clathrin adaptor complex small chain                                                                                                                                                                                                             |                    |                          |                 |                             |                   |                    |
| AT4G08810 | SUB1__expressed protein                                                                                                                                                                                                                                                                         | 1                  | 0                        | 1               | 0                           | 0                 | 0                  |
| AT4G11850 | phospholipase D gamma 1 / PLD gamma 1 (PLDGAMMA1), identical to phospholipase D gamma 1 SP:Q9T053 from ( <i>Arabidopsis thaliana</i> )                                                                                                                                                          | 0                  | 0                        | 0               | 0                           | 1                 | 0                  |
| AT4G13930 | SHM4__glycine hydroxymethyltransferase, putative / serine hydroxymethyltransferase, putative / serine/threonine aldolase, putative, similar to serine hydroxymethyltransferase ( <i>Chlamydomonas reinhardtii</i> ) GI:17066746; contains Pfam profile PF00464: serine hydroxymethyltransferase | 1                  | 1                        | 1               | 1                           | 1                 | 1                  |
| AT4G17140 | pleckstrin homology (PH) domain-containing protein, contains Pfam profile PF00169: PH domain                                                                                                                                                                                                    | 1                  | 0                        | 0               | 0                           | 0                 | 1                  |
| AT4G17530 | RAB1C__Ras-related GTP-binding protein, putative, very strong similarity to RAB1C ( <i>Lotus corniculatus</i> var. <i>japonicus</i> ) GI:1370166; contains Pfam profile PF00071: Ras family                                                                                                     | 1                  | 0                        | 0               | 0                           | 0                 | 1                  |
| AT4G18760 | leucine-rich repeat family protein, contains leucine rich-repeat domains Pfam:PF00560, INTERPRO:IPR001611                                                                                                                                                                                       | 0                  | 0                        | 1               | 0                           | 0                 | 0                  |
| AT4G18830 | ATOFP5_OF5__ovate family protein, 52% similar to ovate protein (GI:23429649) ( <i>Lycopersicon esculentum</i> ); contains TIGRFAM TIGR01568 : uncharacterized plant-specific domain TIGR01568                                                                                                   | 0                  | 0                        | 0               | 0                           | 1                 | 0                  |



**Supplementary Tables pertaining to Figure 1**

**Supplementary Table S6. Proteins of the root cellular proteome that lack RNA expression data**

| Locus     | Annotation                                                                                                                                                                                                                            | Root Hairs (COBL9) | Non-Hair Epidermis (WER) | Cortex (CORTEX) | Endodermis/ Quiescent (SCR) | Vasculature (WOL) | Columella (PET111) |
|-----------|---------------------------------------------------------------------------------------------------------------------------------------------------------------------------------------------------------------------------------------|--------------------|--------------------------|-----------------|-----------------------------|-------------------|--------------------|
| AT4G19006 | 26S proteasome regulatory subunit, putative (RPN9), similar to 26S proteasome subunit p40.5 (Homo sapiens) gi:3618343:dbj:BAA33214                                                                                                    | 0                  | 0                        | 0               | 0                           | 1                 | 0                  |
| AT4G21180 | DNAJ heat shock N-terminal domain-containing protein / sec63 domain-containing protein, similar to SP:Q9UGP8 Translocation protein SEC63 homolog {Homo sapiens}; contains Pfam profiles PF00226 DnaJ domain, PF02889 Sec63 domain     | 1                  | 0                        | 0               | 0                           | 0                 | 0                  |
| AT4G21540 | Encodes a putative sphingosine kinase (SphK) containing the five conserved domains (C1-C5) previously identified in SphKs.                                                                                                            | 1                  | 0                        | 0               | 0                           | 0                 | 0                  |
| AT4G21570 | expressed protein, contains Pfam profile PF03619: Domain of unknown function                                                                                                                                                          | 1                  | 0                        | 0               | 0                           | 0                 | 0                  |
| AT4G22214 | Encodes a defensin-like (DEFL) family protein.                                                                                                                                                                                        | 1                  | 0                        | 0               | 0                           | 0                 | 0                  |
| AT4G22240 | plastid-lipid associated protein PAP, putative, similar to plastid-lipid associated proteins PAP2 (Brassica rapa) GI:14248550 GI:14248556; contains Pfam profile PF04755: PAP_fibrillin                                               | 1                  | 0                        | 0               | 0                           | 0                 | 1                  |
| AT4G23430 | short-chain dehydrogenase/reductase (SDR) family protein, contains INTERPRO family IPR002198 Short-chain dehydrogenase/reductase (SDR) superfamily; contains Pfam PF00106: oxidoreductase, short chain dehydrogenase/reductase family | 0                  | 1                        | 0               | 0                           | 0                 | 0                  |
| AT4G24310 | expressed protein, contains Pfam profile PF05078: Protein of unknown                                                                                                                                                                  | 0                  | 1                        | 0               | 0                           | 0                 | 0                  |

**Supplementary Tables pertaining to Figure 1**

**Supplementary Table S6. Proteins of the root cellular proteome that lack RNA expression data**

| Locus     | Annotation                                                                                                                                                                                                                                                                                            | Root Hairs (COBL9) | Non-Hair Epidermis (WER) | Cortex (CORTEX) | Endodermis/ Quiescent (SCR) | Vasculature (WOL) | Columella (PET111) |
|-----------|-------------------------------------------------------------------------------------------------------------------------------------------------------------------------------------------------------------------------------------------------------------------------------------------------------|--------------------|--------------------------|-----------------|-----------------------------|-------------------|--------------------|
|           | function (DUF679)                                                                                                                                                                                                                                                                                     |                    |                          |                 |                             |                   |                    |
| AT4G25450 | ATNAP8__ABC transporter family protein, similar to multidrug resistance protein 2 SP:P21440 from ( <i>Mus musculus</i> )                                                                                                                                                                              | 0                  | 0                        | 0               | 0                           | 0                 | 1                  |
| AT4G27585 | band 7 family protein, similar to stomatin-like protein ( <i>Zea mays</i> ) GI:7716464; contains Pfam profile PF01145: SPFH domain / Band 7 family                                                                                                                                                    | 1                  | 1                        | 1               | 0                           | 1                 | 1                  |
| AT4G28510 | ATPHB1__prohibitin, putative, similar to SP:P24142 Prohibitin (B-cell receptor associated protein 32) ( <i>Rattus norvegicus</i> ); contains Pfam profile PF01145: SPFH domain / Band 7 family                                                                                                        | 1                  | 1                        | 1               | 1                           | 1                 | 1                  |
| AT4G29120 | 6-phosphogluconate dehydrogenase NAD-binding domain-containing protein, similar to SP:P23523 2-hydroxy-3-oxopropionate reductase (EC 1.1.1.60) (Tartronate semialdehyde reductase) ( <i>Escherichia coli</i> ); contains Pfam profile PF03446: NAD binding domain of 6-phosphogluconate dehydrogenase | 0                  | 0                        | 0               | 0                           | 1                 | 0                  |
| AT4G30920 | cytosol aminopeptidase family protein, contains Pfam profiles: PF00883 cytosol aminopeptidase family catalytic domain, PF02789: cytosol aminopeptidase family N-terminal domain                                                                                                                       | 1                  | 0                        | 1               | 0                           | 1                 | 0                  |
| AT4G31480 | coatomer beta subunit, putative / beta-coat protein, putative / beta-COP, putative, similar to Coatomer beta subunit (Beta-coat protein) (Beta-COP) from ( <i>Rattus norvegicus</i> ) SP:P23514, ( <i>Mus musculus</i> ) SP:Q9JIF7, ( <i>Homo sapiens</i> ) SP:P53618; contains Pfam                  | 0                  | 0                        | 0               | 1                           | 0                 | 0                  |

**Supplementary Tables pertaining to Figure 1**

**Supplementary Table S6. Proteins of the root cellular proteome that lack RNA expression data**

| Locus     | Annotation                                                                                                                                                                                                                                                                                   | Root Hairs (COBL9) | Non-Hair Epidermis (WER) | Cortex (CORTEX) | Endodermis/ Quiescent (SCR) | Vasculature (WOL) | Columella (PET111) |
|-----------|----------------------------------------------------------------------------------------------------------------------------------------------------------------------------------------------------------------------------------------------------------------------------------------------|--------------------|--------------------------|-----------------|-----------------------------|-------------------|--------------------|
|           | profile: PF01602 Adaptin N terminal region                                                                                                                                                                                                                                                   |                    |                          |                 |                             |                   |                    |
| AT4G33120 | coclaurine N-methyltransferase, putative, similar to coclaurine N-methyltransferase ( <i>Coptis japonica</i> )<br>GI:16754879                                                                                                                                                                | 1                  | 1                        | 1               | 0                           | 1                 | 1                  |
| AT4G33580 | carbonic anhydrase family protein / carbonate dehydratase family protein, similar to SP:P46512 Carbonic anhydrase 1 (EC 4.2.1.1) ( <i>Carbonate dehydratase 1</i> ) { <i>Flaveria linearis</i> }; contains Pfam profile PF00484: Carbonic anhydrase                                          | 1                  | 1                        | 0               | 1                           | 0                 | 0                  |
| AT4G35100 | PIP3_PIP2;7_PIP3A_SIMIP__plasma membrane intrinsic protein (SIMIP), nearly identical to plasma membrane intrinsic protein ( <i>Arabidopsis thaliana</i> )<br>GI:2306917                                                                                                                      | 1                  | 1                        | 1               | 1                           | 1                 | 1                  |
| AT4G35630 | PSAT__phosphoserine aminotransferase, chloroplast (PSAT), identical to Phosphoserine aminotransferase, chloroplast precursor (PSAT) (SP:Q96255)( <i>Arabidopsis thaliana</i> ); contains TIGRFAM TIGR01364: phosphoserine aminotransferase; contains Pfam PF00266: aminotransferase, class V | 1                  | 0                        | 1               | 1                           | 1                 | 1                  |
| AT4G35860 | ATGB2__Ras-related GTP-binding protein, putative, similar to Rab2-like GTP-binding protein GI:1765896 from ( <i>Arabidopsis thaliana</i> )                                                                                                                                                   | 1                  | 0                        | 0               | 0                           | 0                 | 0                  |
| AT4G36080 | FAT domain-containing protein / phosphatidylinositol 3- and 4-kinase family protein, contains Pfam profiles PF00454: Phosphatidylinositol 3- and 4-                                                                                                                                          | 0                  | 0                        | 1               | 0                           | 1                 | 0                  |

**Supplementary Tables pertaining to Figure 1**

**Supplementary Table S6. Proteins of the root cellular proteome that lack RNA expression data**

| Locus     | Annotation                                                                                                                                                                                                                                                              | Root Hairs (COBL9) | Non-Hair Epidermis (WER) | Cortex (CORTEX) | Endodermis/Quiescent (SCR) | Vasculature (WOL) | Columella (PET111) |
|-----------|-------------------------------------------------------------------------------------------------------------------------------------------------------------------------------------------------------------------------------------------------------------------------|--------------------|--------------------------|-----------------|----------------------------|-------------------|--------------------|
|           | kinase, PF02259: FAT domain, PF02260: FATC domain                                                                                                                                                                                                                       |                    |                          |                 |                            |                   |                    |
| AT4G36195 | serine carboxypeptidase S28 family protein, contains Pfam PF05577: Serine carboxypeptidase S28                                                                                                                                                                          | 1                  | 0                        | 1               | 0                          | 0                 | 0                  |
| AT4G38790 | ER lumen protein retaining receptor family protein, similar to SP:P35402 ER lumen protein retaining receptor (HDEL receptor) {Arabidopsis thaliana}; contains Pfam profile PF00810: ER lumen protein retaining receptor                                                 | 0                  | 0                        | 0               | 0                          | 0                 | 1                  |
| AT4G39200 | 40S ribosomal protein S25 (RPS25E), ribosomal protein S25, Lycopersicon esculentum, PIR2:S40089                                                                                                                                                                         | 0                  | 0                        | 0               | 0                          | 1                 | 0                  |
| AT5G02960 | 40S ribosomal protein S23 (RPS23B), ribosomal protein S23, Fragaria x ananassa, PIR:S56673                                                                                                                                                                              | 1                  | 0                        | 0               | 0                          | 1                 | 0                  |
| AT5G04990 | sad1/unc-84 protein-related, contains weak similarity to Sad1/unc-84 protein-like 1 (Swiss-Prot:O94901) (Homo sapiens)                                                                                                                                                  | 1                  | 1                        | 0               | 0                          | 0                 | 0                  |
| AT5G07980 | dentin sialophosphoprotein-related, contains weak similarity to Swiss-Prot:Q9NZW4 dentin sialophosphoprotein precursor (Homo sapiens)                                                                                                                                   | 0                  | 0                        | 1               | 0                          | 0                 | 0                  |
| AT5G08610 | DEAD box RNA helicase (RH26), strong similarity to RNA helicase RH26 (Arabidopsis thaliana) GI:3776025; contains Pfam profiles PF00270: DEAD/DEAH box helicase, PF00271: Helicase conserved C-terminal domain; identical to cDNA DEAD box RNA helicase, RH26 GI:3776024 | 0                  | 0                        | 0               | 0                          | 1                 | 0                  |
| AT5G08670 | ATP synthase beta chain 1,                                                                                                                                                                                                                                              | 0                  | 0                        | 0               | 0                          | 1                 | 0                  |

**Supplementary Tables pertaining to Figure 1**

**Supplementary Table S6. Proteins of the root cellular proteome that lack RNA expression data**

| Locus     | Annotation                                                                                                                                                                                                                                                                                                                                                                                                                                                                                                         | Root Hairs (COBL9) | Non-Hair Epidermis (WER) | Cortex (CORTEX) | Endodermis/ Quiescent (SCR) | Vasculature (WOL) | Columella (PET111) |
|-----------|--------------------------------------------------------------------------------------------------------------------------------------------------------------------------------------------------------------------------------------------------------------------------------------------------------------------------------------------------------------------------------------------------------------------------------------------------------------------------------------------------------------------|--------------------|--------------------------|-----------------|-----------------------------|-------------------|--------------------|
|           | mitochondrial, identical to SP:P83483 ATP synthase beta chain 1, mitochondrial precursor (EC 3.6.3.14) { <i>Arabidopsis thaliana</i> }; strong similarity to SP:P17614 ATP synthase beta chain, mitochondrial precursor (EC 3.6.3.14) { <i>Nicotiana plumbaginifolia</i> }; contains Pfam profiles PF00006: ATP synthase alpha/beta family nucleotide-binding domain, PF00306: ATP synthase ab C terminal, PF02874: ATP synthase alpha/beta family beta-barrel domain; supporting cDNA gi:26452102:dbj:AK118538.1: |                    |                          |                 |                             |                   |                    |
| AT5G10840 | endomembrane protein 70, putative, TM4 family;                                                                                                                                                                                                                                                                                                                                                                                                                                                                     | 1                  | 1                        | 1               | 1                           | 1                 | 1                  |
| AT5G11880 | diaminopimelate decarboxylase, putative / DAP carboxylase, putative, similar to diaminopimelate decarboxylase ( <i>Arabidopsis thaliana</i> ) GI:6562332; contains Pfam profiles PF02784: Pyridoxal-dependent decarboxylase pyridoxal binding domain, PF00278: Pyridoxal-dependent decarboxylase C-terminal sheet domain                                                                                                                                                                                           | 1                  | 1                        | 1               | 1                           | 1                 | 1                  |
| AT5G12950 | expressed protein, putative secreted protein SCF41.30c, <i>Streptomyces coelicolor</i> , EMBL:SCF41_30                                                                                                                                                                                                                                                                                                                                                                                                             | 0                  | 1                        | 0               | 0                           | 0                 | 0                  |
| AT5G14060 | CARAB-AK-LYS__aspartate kinase, lysine-sensitive, nearly identical to gi:2257743                                                                                                                                                                                                                                                                                                                                                                                                                                   | 1                  | 0                        | 0               | 0                           | 0                 | 0                  |
| AT5G15200 | 40S ribosomal protein S9 (RPS9B), 40S ribosomal protein S9, <i>Chlamydomonas</i> sp., EMBL:AU066528                                                                                                                                                                                                                                                                                                                                                                                                                | 1                  | 0                        | 0               | 1                           | 1                 | 1                  |
| AT5G15650 | RGP2__reversibly glycosylated                                                                                                                                                                                                                                                                                                                                                                                                                                                                                      | 1                  | 1                        | 1               | 1                           | 1                 | 1                  |

**Supplementary Tables pertaining to Figure 1**

**Supplementary Table S6. Proteins of the root cellular proteome that lack RNA expression data**

| Locus     | Annotation                                                                                                                                                                                                                                                    | Root Hairs (COBL9) | Non-Hair Epidermis (WER) | Cortex (CORTEX) | Endodermis/Quiescent (SCR) | Vasculature (WOL) | Columella (PET111) |
|-----------|---------------------------------------------------------------------------------------------------------------------------------------------------------------------------------------------------------------------------------------------------------------|--------------------|--------------------------|-----------------|----------------------------|-------------------|--------------------|
|           | polypeptide-2 (RGP2), identical to reversibly glycosylated polypeptide-2 ( <i>Arabidopsis thaliana</i> ) GI:2317731                                                                                                                                           |                    |                          |                 |                            |                   |                    |
| AT5G16170 | expressed protein, contains Pfam profile PF03267: <i>Arabidopsis</i> protein of unknown function, DUF266                                                                                                                                                      | 0                  | 0                        | 0               | 0                          | 0                 | 1                  |
| AT5G16370 | AMP-binding protein, putative, similar to AMP-binding protein GI:1903034 from ( <i>Brassica napus</i> ); contains Pfam AMP-binding domain PF00501; identical to cDNA adenosine monophosphate binding protein 5 AMPBP5 (AMPBP5) GI:20799718                    | 0                  | 1                        | 0               | 0                          | 0                 | 0                  |
| AT5G17630 | glucose-6-phosphate/phosphate translocator, putative, similar to glucose-6-phosphate/phosphate-translocator precursor ( <i>Solanum tuberosum</i> ) gi:2997593:gb:AAC08526                                                                                     | 0                  | 0                        | 0               | 0                          | 1                 | 1                  |
| AT5G17920 | ATMETS_ATMS1_ATCIMS__The protein undergoes thiolation following treatment with the oxidant tert-butylhydroperoxide.                                                                                                                                           | 1                  | 1                        | 1               | 1                          | 1                 | 1                  |
| AT5G18380 | 40S ribosomal protein S16 (RPS16C)                                                                                                                                                                                                                            | 0                  | 0                        | 0               | 1                          | 1                 | 1                  |
| AT5G18480 | glycogenin glucosyltransferase (glycogenin)-related, low similarity to glycogenin-1 from <i>Mus musculus</i> (SP:Q9R062), <i>Rattus norvegicus</i> (SP:O08730), <i>Homo sapiens</i> (SP:P46976); contains Pfam profile PF01501: Glycosyl transferase family 8 | 1                  | 1                        | 1               | 0                          | 1                 | 1                  |
| AT5G20000 | RPT6A_26S proteasome AAA-ATPase subunit, putative, almost identical to 26S proteasome AAA-ATPase subunit RPT6a GI:6652888 from ( <i>Arabidopsis thaliana</i> ); almost                                                                                        | 0                  | 0                        | 0               | 1                          | 1                 | 0                  |

**Supplementary Tables pertaining to Figure 1**

**Supplementary Table S6. Proteins of the root cellular proteome that lack RNA expression data**

| Locus     | Annotation                                                                                                                                                                                                             | Root Hairs (COBL9) | Non-Hair Epidermis (WER) | Cortex (CORTEX) | Endodermis/ Quiescent (SCR) | Vasculature (WOL) | Columella (PET111) |
|-----------|------------------------------------------------------------------------------------------------------------------------------------------------------------------------------------------------------------------------|--------------------|--------------------------|-----------------|-----------------------------|-------------------|--------------------|
|           | identical to a member of conserved Sug1 CAD family AtSUG1 GI:13537115 from ( <i>Arabidopsis thaliana</i> )                                                                                                             |                    |                          |                 |                             |                   |                    |
| AT5G20490 | XIK_ATXIK__myosin, putative, similar to myosin (GI:433663) ( <i>Arabidopsis thaliana</i> ); myosin-like protein my5, common sunflower, PIR:T14279                                                                      | 1                  | 0                        | 0               | 0                           | 0                 | 0                  |
| AT5G22020 | strictosidine synthase family protein, similar to SP:P15324 Strictosidine synthase precursor (EC 4.3.3.2) { <i>Rauvolfia mannii</i> }; contains Pfam profile PF03088: Strictosidine synthase                           | 0                  | 0                        | 1               | 0                           | 0                 | 0                  |
| AT5G22350 | expressed protein                                                                                                                                                                                                      | 1                  | 0                        | 0               | 0                           | 0                 | 0                  |
| AT5G23575 | transmembrane protein, putative, similar to cleft lip and palate transmembrane protein 1 ( <i>Homo sapiens</i> ) GI:4039014; contains Pfam profile PF05602: Cleft lip and palate transmembrane protein 1 (CLPTM1)      | 1                  | 1                        | 1               | 1                           | 1                 | 1                  |
| AT5G24690 | expressed protein                                                                                                                                                                                                      | 0                  | 0                        | 0               | 0                           | 1                 | 0                  |
| AT5G24960 | CYP71A14__cytochrome P450 71A14, putative (CYP71A14), identical to Cytochrome P450 71A14 (SP:P58045) ( <i>Arabidopsis thaliana</i> ); cytochrome P450 - <i>Nepeta racemosa</i> , EMBL:Y09423                           | 0                  | 0                        | 0               | 0                           | 0                 | 1                  |
| AT5G25265 | expressed protein                                                                                                                                                                                                      | 1                  | 1                        | 1               | 0                           | 1                 | 0                  |
| AT5G26260 | meprin and TRAF homology domain-containing protein / MATH domain-containing protein, similar to ubiquitin-specific protease 12 ( <i>Arabidopsis thaliana</i> ) GI:11993471; contains Pfam profile PF00917: MATH domain | 1                  | 1                        | 1               | 1                           | 1                 | 1                  |
| AT5G26280 | meprin and TRAF homology domain-containing protein / MATH domain-                                                                                                                                                      | 1                  | 1                        | 1               | 1                           | 0                 | 1                  |

**Supplementary Tables pertaining to Figure 1**

**Supplementary Table S6. Proteins of the root cellular proteome that lack RNA expression data**

| Locus     | Annotation                                                                                                                                                                                                                                                                     | Root Hairs (COBL9) | Non-Hair Epidermis (WER) | Cortex (CORTEX) | Endodermis/ Quiescent (SCR) | Vasculature (WOL) | Columella (PET111) |
|-----------|--------------------------------------------------------------------------------------------------------------------------------------------------------------------------------------------------------------------------------------------------------------------------------|--------------------|--------------------------|-----------------|-----------------------------|-------------------|--------------------|
|           | containing protein, low similarity to ubiquitin-specific protease 12 ( <i>Arabidopsis thaliana</i> ) GI:11993471; contains Pfam profile PF00917: MATH domain                                                                                                                   |                    |                          |                 |                             |                   |                    |
| AT5G26667 | uridylylate kinase / uridine monophosphate kinase / UMP kinase (PYR6), identical to uridylylate kinase / UMP/CMP kinase SP:O04905 from ( <i>Arabidopsis thaliana</i> )                                                                                                         | 1                  | 0                        | 0               | 1                           | 0                 | 0                  |
| AT5G27120 | SAR DNA-binding protein, putative, strong similarity to SAR DNA-binding protein-1 ( <i>Pisum sativum</i> ) GI:3132696; contains Pfam profile PF01798: Putative snoRNA binding domain; has similarity to MAR binding NOP58 protein                                              | 1                  | 1                        | 0               | 1                           | 1                 | 0                  |
| AT5G27395 |                                                                                                                                                                                                                                                                                | 1                  | 0                        | 0               | 0                           | 0                 | 0                  |
| AT5G27640 | TIF3B1_ATEIF3B-1_ATTIF3B1 EIF3B EIF3B-1__eukaryotic translation initiation factor 3 subunit 9 / eIF-3 eta / eIF3b (TIF3B1), nearly identical to SP:Q9C5Z1 Eukaryotic translation initiation factor 3 subunit 9 (eIF-3 eta) (eIF3 p110) (eIF3b) { <i>Arabidopsis thaliana</i> } | 0                  | 0                        | 0               | 0                           | 1                 | 0                  |
| AT5G28540 | luminal binding protein 1 (BiP-1) (BP1), SWISS-PROT:Q9LKR3 PMID:8888624                                                                                                                                                                                                        | 1                  | 1                        | 1               | 1                           | 1                 | 1                  |
| AT5G33320 | CUE1_ARAPPT_PPT__triose phosphate/phosphate translocator, putative, similar to SWISS-PROT:P52178 triose phosphate/phosphate translocator ( <i>Cauliflower</i> ) { <i>Brassica oleracea</i> }                                                                                   | 1                  | 1                        | 1               | 1                           | 1                 | 1                  |



**Supplementary Tables pertaining to Figure 1**

**Supplementary Table S6. Proteins of the root cellular proteome that lack RNA expression data**

| Locus     | Annotation                                                                                                                                                                                                                                                       | Root Hairs (COBL9) | Non-Hair Epidermis (WER) | Cortex (CORTEX) | Endodermis/Quiescent (SCR) | Vasculature (WOL) | Columella (PET111) |
|-----------|------------------------------------------------------------------------------------------------------------------------------------------------------------------------------------------------------------------------------------------------------------------|--------------------|--------------------------|-----------------|----------------------------|-------------------|--------------------|
| AT5G35590 | PAA1__20S proteasome alpha subunit A1 (PAA1) (PRC1), identical to proteasome subunit alpha type 6-1 SP:O81146 GI:12643647 from ( <i>Arabidopsis thaliana</i> ); identical to cDNA proteasome subunit prc1 GI:2511587                                             | 1                  | 0                        | 1               | 1                          | 1                 | 0                  |
| AT5G39740 | 60S ribosomal protein L5 (RPL5B), ribosomal protein L5, rice                                                                                                                                                                                                     | 0                  | 0                        | 0               | 0                          | 1                 | 0                  |
| AT5G41210 | ATGSTT1_GST10__glutathione S-transferase (GST10), identical to glutathione transferase AtGST 10 ( <i>Arabidopsis thaliana</i> ) GI:4049401                                                                                                                       | 1                  | 0                        | 0               | 0                          | 0                 | 1                  |
| AT5G42020 | BIP__luminal binding protein 2 (BiP-2) (BP2), similar to SWISS-PROT: Q39043; GI:1303695; luminal binding protein (BiP) ( <i>Arabidopsis thaliana</i> )                                                                                                           | 1                  | 1                        | 1               | 1                          | 1                 | 1                  |
| AT5G44820 | expressed protein, similar to unknown protein (pir::T04881)                                                                                                                                                                                                      | 1                  | 0                        | 0               | 0                          | 0                 | 0                  |
| AT5G46430 | 60S ribosomal protein L32 (RPL32B)                                                                                                                                                                                                                               | 0                  | 0                        | 0               | 0                          | 1                 | 0                  |
| AT5G53480 | importin beta-2, putative, similar to importin-beta2 ( <i>Oryza sativa</i> (japonica cultivar-group)) GI:3983665; contains Pfam profile PF03810: Importin-beta N-terminal domain                                                                                 | 1                  | 0                        | 1               | 1                          | 1                 | 0                  |
| AT5G54810 | TSB1_TRP2_TRPB__tryptophan synthase, beta subunit 1 (TSB1), identical to SP:P14671                                                                                                                                                                               | 0                  | 1                        | 0               | 0                          | 0                 | 0                  |
| AT5G56010 | HSP81-3__heat shock protein, putative, strong similarity to SP:P55737 Heat shock protein 81-2 (HSP81-2) { <i>Arabidopsis thaliana</i> }; contains Pfam profiles PF02518: ATPase, histidine kinase-, DNA gyrase B-, and HSP90-like domain protein, PF00183: Hsp90 | 0                  | 0                        | 0               | 0                          | 1                 | 0                  |

**Supplementary Tables pertaining to Figure 1**

**Supplementary Table S6. Proteins of the root cellular proteome that lack RNA expression data**

| Locus     | Annotation                                                                                                                                         | Root Hairs (COBL9) | Non-Hair Epidermis (WER) | Cortex (CORTEX) | Endodermis/ Quiescent (SCR) | Vasculature (WOL) | Columella (PET111) |
|-----------|----------------------------------------------------------------------------------------------------------------------------------------------------|--------------------|--------------------------|-----------------|-----------------------------|-------------------|--------------------|
|           | protein                                                                                                                                            |                    |                          |                 |                             |                   |                    |
| AT5G56030 | HSP81-2__heat shock protein 81-2 (HSP81-2), nearly identical to SP:P55737 Heat shock protein 81-2 (HSP81-2) {Arabidopsis thaliana}                 | 1                  | 0                        | 0               | 1                           | 1                 | 0                  |
| AT5G56680 | EMB2755__asparaginyl-tRNA synthetase 1, cytoplasmic / asparagine-tRNA ligase 1 (SYNC1), identical to SP:Q9SW96                                     | 0                  | 0                        | 0               | 0                           | 1                 | 0                  |
| AT5G57020 | NMT1_ATNMT1__myristoyl-CoA:protein N-myristoyltransferase 1 (NMT1), identical to N-myristoyltransferase 1 (NMT1) (Arabidopsis thaliana) GI:7339834 | 0                  | 0                        | 0               | 0                           | 1                 | 0                  |
| AT5G60700 | glycosyltransferase family protein 2, contains Pfam profile PF00535: glycosyl transferase, group 2 family protein                                  | 1                  | 1                        | 0               | 0                           | 0                 | 1                  |
| AT5G62270 | expressed protein                                                                                                                                  | 1                  | 0                        | 0               | 0                           | 0                 | 0                  |
| AT5G66860 | expressed protein                                                                                                                                  | 1                  | 1                        | 1               | 1                           | 1                 | 1                  |
| ATCG01130 | YCF1.2__hypothetical protein                                                                                                                       | 1                  | 0                        | 1               | 1                           | 1                 | 0                  |
| ATMG00560 | RPL2__encodes a mitochondrial ribosomal protein L2, a constituent of the large subunit of the ribosomal complex                                    | 1                  | 0                        | 0               | 0                           | 0                 | 0                  |

Supplementary Tables pertaining to Figures 1 and 2

Supplementary Table S7. GO analysis of root proteins found in a single cell type

The p-values of statistical enrichment for the GO identifiers in each of the cell types; p-values  $\leq 0.005$  are in bold and considered to be enriched GO terms

| GO Identifier | GO Term Description                                     | Root Hairs (COBL9) Cluster 33 p-value | Columella (PET111) Cluster 7 p-value | Vasculature (WOL) Cluster 6 p-value | Non-Hair Epidermis (WER) Cluster 34 p-value | Endodermis (SCR) Cluster 55 p-value | Cortex (COR) Cluster 25 p-value |
|---------------|---------------------------------------------------------|---------------------------------------|--------------------------------------|-------------------------------------|---------------------------------------------|-------------------------------------|---------------------------------|
| GO:0000095    | S-adenosylmethionine transmembrane transporter activity | 1                                     | 1                                    | 1                                   | <b>0.002685207</b>                          | 1                                   | 1                               |
| GO:0000910    | cytokinesis                                             | 1                                     | 1                                    | <b>0.001088727</b>                  | 1                                           | 1                                   | 1                               |
| GO:0003735    | structural constituent of ribosome                      | <b>0.001161272</b>                    | 0.216797404                          | <b>8.9622E-07</b>                   | 0.13630355                                  | <b>6.9726E-07</b>                   | 1                               |
| GO:0004474    | malate synthase activity                                | 1                                     | 1                                    | 1                                   | 1                                           | 1                                   | <b>0.003116759</b>              |
| GO:0004587    | ornithine-oxo-acid transaminase activity                | 1                                     | <b>0.004171661</b>                   | 1                                   | 1                                           | 1                                   | 1                               |
| GO:0004781    | sulfate adenylyltransferase (ATP) activity              | 1                                     | 1                                    | <b>0.00058232</b>                   | 1                                           | 1                                   | 0.012352598                     |
| GO:0004812    | aminoacyl-tRNA ligase activity                          | 0.20345508                            | 1                                    | 0.184170328                         | <b>0.001696729</b>                          | 1                                   | 1                               |
| GO:0005046    | KDEL sequence binding                                   | 1                                     | 1                                    | 1                                   | <b>0.002685207</b>                          | 1                                   | 1                               |
| GO:0005365    | myo-inositol transmembrane transporter activity         | 1                                     | 1                                    | 1                                   | <b>0.002685207</b>                          | 1                                   | 1                               |
| GO:0005635    | nuclear envelope                                        | 1                                     | 1                                    | <b>2.01368E-05</b>                  | 1                                           | 1                                   | 0.050441304                     |
| GO:0005730    | nucleolus                                               | 0.150610182                           | 0.059931641                          | <b>1.09458E-07</b>                  | 1                                           | 0.021344117                         | 1                               |
| GO:0005737    | cytoplasm                                               | 0.142586898                           | 0.158911764                          | <b>0.002479565</b>                  | 1                                           | 0.07570783                          | 1                               |
| GO:0005739    | mitochondrion                                           | <b>1.64491E-05</b>                    | <b>1.39672E-05</b>                   | 1                                   | <b>6.36441E-07</b>                          | 1                                   | 0.059012425                     |
| GO:0005759    | mitochondrial matrix                                    | <b>0.003948399</b>                    | 0.107751418                          | 1                                   | 1                                           | 1                                   | 1                               |

**Supplementary Tables pertaining to Figures 1 and 2**

**Supplementary Table S7. GO analysis of root proteins found in a single cell type**

The p-values of statistical enrichment for the GO identifiers in each of the cell types; p-values  $\leq 0.005$  are in bold and considered to be enriched GO terms

| GO Identifier | GO Term Description                         | Root Hairs (COBL9) Cluster 33 p-value | Columella (PET111) Cluster 7 p-value | Vasculature (WOL) Cluster 6 p-value | Non-Hair Epidermis (WER) Cluster 34 p-value | Endodermis (SCR) Cluster 55 p-value | Cortex (COR) Cluster 25 p-value |
|---------------|---------------------------------------------|---------------------------------------|--------------------------------------|-------------------------------------|---------------------------------------------|-------------------------------------|---------------------------------|
| GO:0005773    | vacuole                                     | 0.007903408                           | <b>1.99823E-06</b>                   | 0.078678573                         | 1                                           | 0.082290385                         | 0.110630464                     |
| GO:0005777    | peroxisome                                  | 0.094722455                           | <b>0.001102895</b>                   | 0.204234749                         | 1                                           | 1                                   | <b>0.004643314</b>              |
| GO:0005783    | endoplasmic reticulum                       | <b>0.000709048</b>                    | <b>0.004204992</b>                   | 0.012061162                         | 0.352785108                                 | 0.027555944                         | 0.007994995                     |
| GO:0005794    | Golgi apparatus                             | <b>0.000551139</b>                    | 0.315427882                          | 1                                   | <b>0.004550286</b>                          | 0.040240628                         | 0.053040507                     |
| GO:0005840    | ribosome                                    | 0.013698279                           | 0.359131328                          | <b>8.30651E-05</b>                  | 0.304080007                                 | <b>0.000114399</b>                  | 1                               |
| GO:0005886    | plasma membrane                             | 0.015383636                           | <b>0.000317324</b>                   | <b>1.30189E-10</b>                  | 1                                           | <b>0.000825516</b>                  | 0.008471668                     |
| GO:0006014    | D-ribose metabolic process                  | 0.102575599                           | 1                                    | <b>0.004114794</b>                  | 1                                           | 1                                   | 1                               |
| GO:0006177    | GMP biosynthetic process                    | 1                                     | 1                                    | <b>0.000294065</b>                  | 1                                           | 1                                   | 1                               |
| GO:0006412    | translation                                 | <b>0.000449235</b>                    | 0.224118866                          | <b>7.47586E-06</b>                  | 0.362676123                                 | <b>0.000113364</b>                  | 1                               |
| GO:0006414    | translational elongation                    | 1                                     | 1                                    | 0.177930872                         | 1                                           | <b>0.001499183</b>                  | 1                               |
| GO:0006418    | tRNA aminoacylation for protein translation | 0.216164466                           | 1                                    | 0.023633949                         | <b>0.002001514</b>                          | 1                                   | 1                               |
| GO:0006422    | aspartyl-tRNA aminoacylation                | 1                                     | 1                                    | 1                                   | 1                                           | <b>0.002637257</b>                  | 1                               |
| GO:0006606    | protein import into nucleus                 | 1                                     | 1                                    | <b>5.21273E-05</b>                  | 1                                           | 1                                   | 1                               |
| GO:0006621    | protein retention in ER lumen               | 1                                     | 1                                    | 1                                   | <b>0.002685207</b>                          | 1                                   | 1                               |
| GO:0006744    | ubiquinone biosynthetic process             | <b>0.001843583</b>                    | 1                                    | 1                                   | 1                                           | 1                                   | 1                               |
| GO:0006913    | nucleocytoplasmic transport                 | 1                                     | 1                                    | <b>0.000688081</b>                  | 0.046210993                                 | 1                                   | 1                               |
| GO:0008026    | ATP-dependent                               | 1                                     | 1                                    | <b>0.000528917</b>                  | 1                                           | 0.150694471                         | 0.172438039                     |

Supplementary Tables pertaining to Figures 1 and 2

Supplementary Table S7. GO analysis of root proteins found in a single cell type

The p-values of statistical enrichment for the GO identifiers in each of the cell types; p-values  $\leq 0.005$  are in bold and considered to be enriched GO terms

| GO Identifier | GO Term Description                                | Root Hairs (COBL9) Cluster 33 p-value | Columella (PET111) Cluster 7 p-value | Vasculature (WOL) Cluster 6 p-value | Non-Hair Epidermis (WER) Cluster 34 p-value | Endodermis (SCR) Cluster 55 p-value | Cortex (COR) Cluster 25 p-value |
|---------------|----------------------------------------------------|---------------------------------------|--------------------------------------|-------------------------------------|---------------------------------------------|-------------------------------------|---------------------------------|
|               | helicase activity                                  |                                       |                                      |                                     |                                             |                                     |                                 |
| GO:0008470    | isovaleryl-CoA dehydrogenase activity              | 1                                     | <b>0.004171661</b>                   | 1                                   | 1                                           | 1                                   | 1                               |
| GO:0008540    | proteasome regulatory particle, base subcomplex    | 0.083950502                           | 1                                    | <b>5.21273E-05</b>                  | 1                                           | 1                                   | 1                               |
| GO:0009225    | nucleotide-sugar metabolic process                 | 0.168558262                           | <b>0.002465571</b>                   | 1                                   | 0.046210993                                 | 1                                   | 1                               |
| GO:0009411    | response to UV                                     | 1                                     | 1                                    | 1                                   | 1                                           | 1                                   | <b>2.25502E-05</b>              |
| GO:0009507    | chloroplast                                        | 0.032838734                           | 0.027947013                          | 0.028861089                         | <b>4.44343E-06</b>                          | 1                                   | 0.051240009                     |
| GO:0009535    | chloroplast thylakoid membrane                     | 0.225518358                           | <b>0.003221857</b>                   | 0.215178789                         | 0.345505753                                 | 1                                   | 0.360144099                     |
| GO:0009570    | chloroplast stroma                                 | 0.106148019                           | 0.123164952                          | 0.192383583                         | <b>3.89768E-05</b>                          | 0.370909759                         | 0.204151046                     |
| GO:0009606    | tropism                                            | 1                                     | <b>0.004171661</b>                   | 1                                   | 1                                           | 1                                   | 1                               |
| GO:0009658    | chloroplast organization                           | 1                                     | 1                                    | 0.253161042                         | <b>0.004084833</b>                          | 1                                   | 1                               |
| GO:0009733    | response to auxin stimulus                         | 1                                     | 0.369762843                          | <b>0.005240254</b>                  | 1                                           | 1                                   | 1                               |
| GO:0009813    | flavonoid biosynthetic process                     | 1                                     | 1                                    | 1                                   | 1                                           | 0.064262668                         | <b>0.002890829</b>              |
| GO:0009926    | auxin polar transport                              | 0.274599331                           | 0.129940908                          | <b>0.005038795</b>                  | 1                                           | 1                                   | 1                               |
| GO:0009932    | cell tip growth                                    | <b>0.00011377</b>                     | 1                                    | 1                                   | 1                                           | 1                                   | 1                               |
| GO:0009940    | amino-terminal vacuolar sorting propeptide binding | 1                                     | 1                                    | 1                                   | 1                                           | 1                                   | <b>0.003116759</b>              |

**Supplementary Tables pertaining to Figures 1 and 2**

**Supplementary Table S7. GO analysis of root proteins found in a single cell type**

The p-values of statistical enrichment for the GO identifiers in each of the cell types; p-values  $\leq 0.005$  are in bold and considered to be enriched GO terms

| GO Identifier | GO Term Description                             | Root Hairs (COBL9) Cluster 33 p-value | Columella (PET111) Cluster 7 p-value | Vasculature (WOL) Cluster 6 p-value | Non-Hair Epidermis (WER) Cluster 34 p-value | Endodermis (SCR) Cluster 55 p-value | Cortex (COR) Cluster 25 p-value |
|---------------|-------------------------------------------------|---------------------------------------|--------------------------------------|-------------------------------------|---------------------------------------------|-------------------------------------|---------------------------------|
| GO:0009941    | chloroplast envelope                            | 0.165965595                           | <b>0.00013303</b>                    | <b>0.002869342</b>                  | 0.014243383                                 | 0.371648878                         | 0.022377523                     |
| GO:0010109    | regulation of photosynthesis                    | 1                                     | 1                                    | 1                                   | <b>0.002685207</b>                          | 1                                   | 1                               |
| GO:0010170    | glucose-1-phosphate adenylyltransferase complex | 1                                     | <b>0.004171661</b>                   | 1                                   | 1                                           | 1                                   | 1                               |
| GO:0010483    | pollen tube reception                           | 1                                     | 1                                    | 1                                   | 1                                           | 1                                   | <b>0.003116759</b>              |
| GO:0012506    | vesicle membrane                                | 1                                     | <b>0.004171661</b>                   | 1                                   | 1                                           | 1                                   | 1                               |
| GO:0015148    | D-xylose transmembrane transporter activity     | 1                                     | 1                                    | 1                                   | <b>0.002685207</b>                          | 1                                   | 1                               |
| GO:0015575    | mannitol transmembrane transporter activity     | 1                                     | 1                                    | 1                                   | <b>0.002685207</b>                          | 1                                   | 1                               |
| GO:0015576    | sorbitol transmembrane transporter activity     | 1                                     | 1                                    | 1                                   | <b>0.002685207</b>                          | 1                                   | 1                               |
| GO:0015591    | D-ribose transmembrane transporter activity     | 1                                     | 1                                    | 1                                   | <b>0.002685207</b>                          | 1                                   | 1                               |
| GO:0015629    | actin cytoskeleton                              | 1                                     | <b>0.000912038</b>                   | 1                                   | 1                                           | 1                                   | 1                               |
| GO:0015805    | S-adenosylmethionine transport                  | 1                                     | 1                                    | 1                                   | <b>0.002685207</b>                          | 1                                   | 1                               |
| GO:0015934    | large ribosomal subunit                         | 0.265324623                           | 1                                    | 1                                   | 0.083671869                                 | <b>0.003531236</b>                  | 1                               |
| GO:0016020    | membrane                                        | 0.089648457                           | 0.005807738                          | 0.060769552                         | 0.08175283                                  | 0.015243643                         | <b>0.001832108</b>              |

Supplementary Tables pertaining to Figures 1 and 2

Supplementary Table S7. GO analysis of root proteins found in a single cell type

The p-values of statistical enrichment for the GO identifiers in each of the cell types; p-values  $\leq 0.005$  are in bold and considered to be enriched GO terms

| GO Identifier | GO Term Description                                                                                   | Root Hairs (COBL9) Cluster 33 p-value | Columella (PET111) Cluster 7 p-value | Vasculature (WOL) Cluster 6 p-value | Non-Hair Epidermis (WER) Cluster 34 p-value | Endodermis (SCR) Cluster 55 p-value | Cortex (COR) Cluster 25 p-value |
|---------------|-------------------------------------------------------------------------------------------------------|---------------------------------------|--------------------------------------|-------------------------------------|---------------------------------------------|-------------------------------------|---------------------------------|
| GO:0016035    | zeta DNA polymerase complex                                                                           | 1                                     | 1                                    | 1                                   | 1                                           | 1                                   | <b>0.003116759</b>              |
| GO:0016036    | cellular response to phosphate starvation                                                             | <b>0.002600203</b>                    | 0.094439263                          | 1                                   | 1                                           | 1                                   | 0.072374962                     |
| GO:0016328    | lateral plasma membrane                                                                               | 1                                     | <b>0.004171661</b>                   | 1                                   | 1                                           | 1                                   | 1                               |
| GO:0016337    | cell-cell adhesion                                                                                    | 1                                     | 1                                    | 1                                   | 1                                           | 0.005260857                         | 1                               |
| GO:0016705    | oxidoreductase activity, acting on paired donors, with incorporation or reduction of molecular oxygen | 1                                     | 1                                    | 1                                   | <b>0.002685207</b>                          | 1                                   | 1                               |
| GO:0016711    | flavonoid 3'-monooxygenase activity                                                                   | 1                                     | 1                                    | 1                                   | 1                                           | 1                                   | <b>0.003116759</b>              |
| GO:0016757    | transferase activity, transferring glycosyl groups                                                    | <b>0.004904106</b>                    | 0.224705427                          | 0.226765563                         | 0.362927861                                 | 0.361592749                         | 1                               |
| GO:0018401    | peptidyl-proline hydroxylation to 4-hydroxy-L-proline                                                 | <b>0.000160705</b>                    | 1                                    | 1                                   | 1                                           | 1                                   | 1                               |
| GO:0022625    | cytosolic large ribosomal subunit                                                                     | 1                                     | 1                                    | <b>0.002789866</b>                  | 0.206616656                                 | <b>0.000134093</b>                  | 1                               |
| GO:0022626    | cytosolic ribosome                                                                                    | 0.27270635                            | 0.027503954                          | <b>6.15069E-06</b>                  | 1                                           | <b>1.21267E-08</b>                  | 0.311850841                     |
| GO:0022627    | cytosolic small ribosomal subunit                                                                     | 0.049858161                           | 0.039508169                          | <b>1.23734E-06</b>                  | 1                                           | 0.017687969                         | 1                               |
| GO:0030149    | sphingolipid                                                                                          | 1                                     | 1                                    | 1                                   | 1                                           | 1                                   | <b>0.003116759</b>              |

Supplementary Tables pertaining to Figures 1 and 2

Supplementary Table S7. GO analysis of root proteins found in a single cell type

The p-values of statistical enrichment for the GO identifiers in each of the cell types; p-values  $\leq 0.005$  are in bold and considered to be enriched GO terms

| GO Identifier | GO Term Description                | Root Hairs (COBL9) Cluster 33 p-value | Columella (PET111) Cluster 7 p-value | Vasculature (WOL) Cluster 6 p-value | Non-Hair Epidermis (WER) Cluster 34 p-value | Endodermis (SCR) Cluster 55 p-value | Cortex (COR) Cluster 25 p-value |
|---------------|------------------------------------|---------------------------------------|--------------------------------------|-------------------------------------|---------------------------------------------|-------------------------------------|---------------------------------|
|               | catabolic process                  |                                       |                                      |                                     |                                             |                                     |                                 |
| GO:0030276    | clathrin binding                   | 1                                     | 1                                    | <b>0.00332469</b>                   | 1                                           | 1                                   | 1                               |
| GO:0031210    | phosphatidylcholine binding        | 1                                     | <b>0.004171661</b>                   | 1                                   | 1                                           | 1                                   | 1                               |
| GO:0042254    | ribosome biogenesis                | 1                                     | 1                                    | 0.052058885                         | 0.195755272                                 | <b>0.001798132</b>                  | 1                               |
| GO:0043680    | filiform apparatus                 | 1                                     | 1                                    | 1                                   | 1                                           | 1                                   | <b>0.003116759</b>              |
| GO:0045486    | naringenin 3-dioxygenase activity  | 1                                     | 1                                    | 1                                   | 1                                           | <b>0.002637257</b>                  | 1                               |
| GO:0045735    | nutrient reservoir activity        | 1                                     | 1                                    | <b>0.000154281</b>                  | 1                                           | 1                                   | 1                               |
| GO:0046409    | p-coumarate 3-hydroxylase activity | 1                                     | 1                                    | 1                                   | 1                                           | 1                                   | <b>0.003116759</b>              |
| GO:0048481    | ovule development                  | 1                                     | 1                                    | 1                                   | <b>0.002329645</b>                          | 1                                   | 1                               |
| GO:0048589    | developmental growth               | 1                                     | 1                                    | <b>0.000960945</b>                  | 1                                           | 1                                   | 1                               |
| GO:0050613    | delta14-sterol reductase activity  | 1                                     | 1                                    | 1                                   | 1                                           | <b>0.002637257</b>                  | 1                               |
| GO:0050660    | FAD binding                        | 0.228197404                           | 1                                    | 1                                   | <b>0.002329645</b>                          | 1                                   | 1                               |
| GO:0051020    | GTPase binding                     | 1                                     | 1                                    | 1                                   | 1                                           | <b>0.002637257</b>                  | 1                               |
| GO:0003824    | catalytic                          | 1                                     | 0.371648878                          | 0.087760987                         | 0.035335458                                 | 0.371693061                         | <b>0.003622847</b>              |
| GO:0015031    | protein transport                  | 1                                     | 1                                    | 0.150515996                         | 0.053894255                                 | 0.019526495                         | <b>0.004662127</b>              |



**Supplementary Tables pertaining to Figure 2**

**Supplementary Table S8. Proteins of the root cellular proteome that are in the AraCyc Plant Metabolic Network**

| Locus     | Annotation                                                                                                                                                                                                                                                                                                           | Root Hairs (COBL9) | Non-Hair Epidermis (WER) | Cortex (CORTEX) | Endodermis/Quiescent (SCR) | Vasculature (WOL) | Columella (PET111) |
|-----------|----------------------------------------------------------------------------------------------------------------------------------------------------------------------------------------------------------------------------------------------------------------------------------------------------------------------|--------------------|--------------------------|-----------------|----------------------------|-------------------|--------------------|
| AT1G01090 | CA1_PDH-E1 ALPHA__pyruvate dehydrogenase E1 component alpha subunit, chloroplast, identical to pyruvate dehydrogenase E1 alpha subunit GB:AAB86803 GI:2454182 from ( <i>Arabidopsis thaliana</i> ); identical to cDNA pyruvate dehydrogenase E1 alpha subunit mRNA, nuclear gene encoding plastid protein GI:2454181 | 1                  | 1                        | 1               | 1                          | 1                 | 1                  |
| AT1G02500 | SAM1_SAM-1__S-adenosylmethionine synthetase 1 (SAM1), identical to S-adenosylmethionine synthetase 1 (Methionine adenosyltransferase 1, AdoMet synthetase 1) ( <i>Arabidopsis thaliana</i> ) SWISS-PROT:P23686                                                                                                       | 0                  | 0                        | 1               | 1                          | 1                 | 0                  |
| AT1G04410 | malate dehydrogenase, cytosolic, putative, strong similarity to malate dehydrogenase from <i>Mesembryanthemum crystallinum</i> (SP:O24047), <i>Medicago sativa</i> (SP:O48905), <i>Prunus persica</i> (GI:15982948); contains InterPro entry IPR001236: Lactate/malate dehydrogenase                                 | 1                  | 1                        | 1               | 1                          | 1                 | 1                  |
| AT1G05620 | inosine-uridine preferring nucleoside hydrolase family protein, similar to Chain A, Crystal Structure Of Nucleoside Hydrolase From <i>Leishmania Major</i> GI:8569431; contains Pfam profile PF01156: Inosine-uridine preferring nucleoside hydrolase                                                                | 1                  | 0                        | 0               | 0                          | 0                 | 0                  |
| AT1G06000 | UDP-glucuronosyl/UDP-glucosyl transferase family protein, contains similarity to UDPG glucosyltransferase GB:AAB62270 GI:2232354 from ( <i>Solanum berthaultii</i> )                                                                                                                                                 | 0                  | 0                        | 0               | 0                          | 1                 | 0                  |
| AT1G06290 | ACX3_ATACX3__acyl-CoA oxidase (ACX3), identical to acyl-CoA oxidase ACX3 ( <i>Arabidopsis thaliana</i> ) GI:8163758, GI:8515709                                                                                                                                                                                      | 1                  | 1                        | 1               | 1                          | 1                 | 1                  |
| AT1G06800 | lipase class 3 family protein, similar to DEFECTIVE IN ANther DEHISCENCE1 ( <i>Arabidopsis thaliana</i> ) GI:16215706; contains Pfam profile PF01764: Lipase                                                                                                                                                         | 0                  | 0                        | 1               | 0                          | 0                 | 0                  |

**Supplementary Tables pertaining to Figure 2**

**Supplementary Table S8. Proteins of the root cellular proteome that are in the AraCyc Plant Metabolic Network**

| Locus     | Annotation                                                                                                                                                                                                                                                                                                                                                                                                                                                                                                                                                                                                                                                                                                                                                                                                                                  | Root Hairs (COBL9) | Non-Hair Epidermis (WER) | Cortex (CORTEX) | Endodermis/Quiescent (SCR) | Vasculature (WOL) | Columella (PET111) |
|-----------|---------------------------------------------------------------------------------------------------------------------------------------------------------------------------------------------------------------------------------------------------------------------------------------------------------------------------------------------------------------------------------------------------------------------------------------------------------------------------------------------------------------------------------------------------------------------------------------------------------------------------------------------------------------------------------------------------------------------------------------------------------------------------------------------------------------------------------------------|--------------------|--------------------------|-----------------|----------------------------|-------------------|--------------------|
| AT1G07890 | APX1_CS1__L-ascorbate peroxidase 1, cytosolic (APX1), identical to SP:Q05431 L-ascorbate peroxidase, cytosolic (EC 1.11.1.11) (AP) {Arabidopsis thaliana}, L-ascorbate peroxidase (Arabidopsis thaliana) gi:16173:emb:CAA42168; strong similarity to cytosolic ascorbate peroxidase (Spinacia oleracea) gi:1384110:dbj:BAA12890                                                                                                                                                                                                                                                                                                                                                                                                                                                                                                             | 1                  | 0                        | 1               | 0                          | 1                 | 1                  |
| AT1G08110 | lactoylglutathione lyase, putative / glyoxalase I, putative, similar to lactoylglutathione lyase SP:O04885 from (Brassica juncea)                                                                                                                                                                                                                                                                                                                                                                                                                                                                                                                                                                                                                                                                                                           | 1                  | 0                        | 0               | 0                          | 1                 | 1                  |
| AT1G08200 | AXS2__expressed protein                                                                                                                                                                                                                                                                                                                                                                                                                                                                                                                                                                                                                                                                                                                                                                                                                     | 0                  | 0                        | 0               | 1                          | 1                 | 0                  |
| AT1G08480 | expressed protein                                                                                                                                                                                                                                                                                                                                                                                                                                                                                                                                                                                                                                                                                                                                                                                                                           | 0                  | 0                        | 0               | 1                          | 1                 | 1                  |
| AT1G08830 | CSD1__superoxide dismutase (Cu-Zn) (SODCC) / copper/zinc superoxide dismutase (CSD1), identical to SWISS-PROT: P24704                                                                                                                                                                                                                                                                                                                                                                                                                                                                                                                                                                                                                                                                                                                       | 1                  | 0                        | 1               | 0                          | 1                 | 1                  |
| AT1G09620 | similar to leucyl-tRNA synthetase, putative / leucine--tRNA ligase, putative [Arabidopsis thaliana] (TAIR:At4g04350.1); similar to leucyl tRNA synthetase [Homo sapiens] (GB:BAA95667.1); similar to SYLC_HUMAN Leucyl-tRNA synthetase, cytoplasmic (Leucine--tRNA ligase) (LeuRS) (GB:Q9P2J5); similar to KIAA1352 protein [Homo sapiens] (GB:BAA92590.1); similar to MGC82093 protein [Xenopus laevis] (GB:AAH79713.1); similar to PREDICTED: similar to Leucyl-tRNA synthetase, cytoplasmic (Leucine--tRNA ligase) (LeuRS) [Canis familiaris] (GB:XP_535229.1); contains InterPro domain Aminoacyl-tRNA synthetase, class I (InterPro:IPR001412); contains InterPro domain Leucyl-tRNA synthetase archae/euk cytosolic, class Ia (InterPro:IPR004493); contains InterPro domain Aminoacyl-tRNA synthetase, class Ia (InterPro:IPR002300) | 0                  | 1                        | 0               | 1                          | 1                 | 0                  |

**Supplementary Tables pertaining to Figure 2**

**Supplementary Table S8. Proteins of the root cellular proteome that are in the AraCyc Plant Metabolic Network**

| Locus     | Annotation                                                                                                                                                                                                                                                                                                                                                          | Root Hairs (COBL9) | Non-Hair Epidermis (WER) | Cortex (CORTEX) | Endodermis/ Quiescent (SCR) | Vasculature (WOL) | Columella (PET111) |
|-----------|---------------------------------------------------------------------------------------------------------------------------------------------------------------------------------------------------------------------------------------------------------------------------------------------------------------------------------------------------------------------|--------------------|--------------------------|-----------------|-----------------------------|-------------------|--------------------|
| AT1G09780 | 2,3-biphosphoglycerate-independent phosphoglycerate mutase, putative / phosphoglyceromutase, putative, strong similarity to SP:Q42908 2,3-bisphosphoglycerate-independent phosphoglycerate mutase (EC 5.4.2.1) (Phosphoglyceromutase) {Mesembryanthemum crystallinum}; contains Pfam profile PF01676: Metalloenzyme superfamily                                     | 1                  | 0                        | 1               | 1                           | 1                 | 1                  |
| AT1G09830 | phosphoribosylamine--glycine ligase (PUR2), identical to phosphoribosylamine--glycine ligase, chloroplast (precursor) SP:P52420 from ( <i>Arabidopsis thaliana</i> )                                                                                                                                                                                                | 1                  | 0                        | 0               | 0                           | 1                 | 0                  |
| AT1G10670 | ACLA-1__ expressed protein                                                                                                                                                                                                                                                                                                                                          | 0                  | 0                        | 0               | 1                           | 0                 | 0                  |
| AT1G11580 | pectin methylesterase, putative, similar to pectin methylesterase GI:1617583 from ( <i>Lycopersicon esculentum</i> )                                                                                                                                                                                                                                                | 0                  | 0                        | 1               | 1                           | 1                 | 0                  |
| AT1G11840 | ATGLX1__lactoylglutathione lyase, putative / glyoxalase I, putative, highly similar to putative lactoylglutathione lyase SP:Q39366 from ( <i>Brassica oleracea</i> )                                                                                                                                                                                                | 1                  | 0                        | 1               | 1                           | 1                 | 1                  |
| AT1G11860 | aminomethyltransferase, putative, similar to aminomethyltransferase, mitochondrial precursor SP:O49849 from ( <i>Flaveria anomala</i> )                                                                                                                                                                                                                             | 1                  | 1                        | 1               | 1                           | 1                 | 1                  |
| AT1G12000 | pyrophosphate--fructose-6-phosphate 1-phosphotransferase beta subunit, putative / pyrophosphate-dependent 6-phosphofructose-1-kinase, putative, strong similarity to SP:Q41141 Pyrophosphate--fructose 6-phosphate 1-phosphotransferase beta subunit (EC 2.7.1.90) (PFP) ((PPI-PFK) { <i>Ricinus communis</i> }; contains Pfam profile PF00365: Phosphofructokinase | 0                  | 0                        | 1               | 1                           | 1                 | 0                  |

**Supplementary Tables pertaining to Figure 2**

**Supplementary Table S8. Proteins of the root cellular proteome that are in the AraCyc Plant Metabolic Network**

| Locus     | Annotation                                                                                                                                                                                                                                                                                                                                                                                                                                | Root Hairs (COBL9) | Non-Hair Epidermis (WER) | Cortex (CORTEX) | Endodermis/ Quiescent (SCR) | Vasculature (WOL) | Columella (PET111) |
|-----------|-------------------------------------------------------------------------------------------------------------------------------------------------------------------------------------------------------------------------------------------------------------------------------------------------------------------------------------------------------------------------------------------------------------------------------------------|--------------------|--------------------------|-----------------|-----------------------------|-------------------|--------------------|
| AT1G12240 | ATBETAFRUCT4__beta-fructosidase (BFRUCT4) / beta-fructofuranosidase / invertase, vacuolar, identical to beta-fructosidase GI:1871503 from ( <i>Arabidopsis thaliana</i> ); contains Pfam profile PF00251:Glycosyl hydrolases family 32; identical to cDNA beta-fructosidase (vacuolar form) GI:1321683; similar to SP:Q43857                                                                                                              | 1                  | 0                        | 1               | 0                           | 1                 | 0                  |
| AT1G12640 | membrane bound O-acyl transferase (MBOAT) family protein, low similarity to porcupine from ( <i>Xenopus laevis</i> ) GI:6714514, GI:6714520, GI:6714518, GI:6714516; contains Pfam profile PF03062: MBOAT family                                                                                                                                                                                                                          | 1                  | 0                        | 1               | 0                           | 0                 | 0                  |
| AT1G13280 | AOC4__allene oxide cyclase family protein, similar to ERD12 (GI:15320414), allene oxide cyclase GI:8977961 from ( <i>Lycopersicon esculentum</i> ); contains Pfam profile PF06351: Allene oxide cyclase                                                                                                                                                                                                                                   | 1                  | 1                        | 1               | 1                           | 1                 | 1                  |
| AT1G13440 | glyceraldehyde 3-phosphate dehydrogenase, cytosolic, putative / NAD-dependent glyceraldehyde-3-phosphate dehydrogenase, putative, very strong similarity to SP:P25858 Glyceraldehyde 3-phosphate dehydrogenase, cytosolic (EC 1.2.1.12) { <i>Arabidopsis thaliana</i> }; contains Pfam profiles PF02800: Glyceraldehyde 3-phosphate dehydrogenase C-terminal domain, PF00044: Glyceraldehyde 3-phosphate dehydrogenase NAD binding domain | 0                  | 0                        | 0               | 0                           | 1                 | 1                  |
| AT1G13560 | AAPT1__aminoalcoholphosphotransferase (AAPT1), identical to aminoalcoholphosphotransferase GI:3661593 from ( <i>Arabidopsis thaliana</i> )                                                                                                                                                                                                                                                                                                | 0                  | 0                        | 0               | 0                           | 1                 | 0                  |
| AT1G14290 | acid phosphatase, putative, similar to acid phosphatase ( <i>Lupinus albus</i> ) GI:5360721; contains Pfam profile PF01598 sterol desaturase                                                                                                                                                                                                                                                                                              | 0                  | 0                        | 0               | 1                           | 0                 | 0                  |

**Supplementary Tables pertaining to Figure 2**

**Supplementary Table S8. Proteins of the root cellular proteome that are in the AraCyc Plant Metabolic Network**

| Locus     | Annotation                                                                                                                                                                                                                                                                                                                                                                            | Root Hairs (COBL9) | Non-Hair Epidermis (WER) | Cortex (CORTEX) | Endodermis/ Quiescent (SCR) | Vasculature (WOL) | Columella (PET111) |
|-----------|---------------------------------------------------------------------------------------------------------------------------------------------------------------------------------------------------------------------------------------------------------------------------------------------------------------------------------------------------------------------------------------|--------------------|--------------------------|-----------------|-----------------------------|-------------------|--------------------|
| AT1G14610 | TWN2_VALRS__valyl-tRNA synthetase / valine--tRNA ligase (VALRS), nearly identical to SP:P93736 Valyl-tRNA synthetase (EC 6.1.1.9) (Valine--tRNA ligase) (ValRS) {Arabidopsis thaliana}                                                                                                                                                                                                | 1                  | 0                        | 0               | 0                           | 1                 | 0                  |
| AT1G14810 | semialdehyde dehydrogenase family protein, similar to SP:O31219 Aspartate-semialdehyde dehydrogenase (EC 1.2.1.11) (ASA dehydrogenase) (ASADH) {Legionella pneumophila}; contains Pfam profiles PF02774: Semialdehyde dehydrogenase dimerisation domain, PF01118: Semialdehyde dehydrogenase NAD binding domain                                                                       | 1                  | 1                        | 1               | 1                           | 1                 | 1                  |
| AT1G15690 | AVP1_ATAVP3_AVP-3__pyrophosphate-energized vacuolar membrane proton pump / pyrophosphate-energized inorganic pyrophosphatase (AVP-3), identical to pyrophosphate-energized vacuolar membrane proton pump (pyrophosphate-energized inorganic pyrophosphatase) SP:P31414 from (Arabidopsis thaliana)                                                                                    | 1                  | 1                        | 1               | 1                           | 1                 | 1                  |
| AT1G15710 | prephenate dehydrogenase family protein, contains Pfam profile: PF02153 prephenate dehydrogenase                                                                                                                                                                                                                                                                                      | 1                  | 0                        | 0               | 0                           | 0                 | 0                  |
| AT1G16300 | glyceraldehyde 3-phosphate dehydrogenase, cytosolic, putative / NAD-dependent glyceraldehyde-3-phosphate dehydrogenase, putative, similar to glyceraldehyde-3-phosphate dehydrogenase (Pinus sylvestris) GI:1100223; contains Pfam profiles PF02800: Glyceraldehyde 3-phosphate dehydrogenase C-terminal domain, PF00044: Glyceraldehyde 3-phosphate dehydrogenase NAD binding domain | 1                  | 0                        | 0               | 0                           | 0                 | 0                  |

## Supplementary Tables pertaining to Figure 2

### Supplementary Table S8. Proteins of the root cellular proteome that are in the AraCyc Plant Metabolic Network

| Locus     | Annotation                                                                                                                                                                                                                                                                                                                                                         | Root Hairs (COBL9) | Non-Hair Epidermis (WER) | Cortex (CORTEX) | Endodermis/ Quiescent (SCR) | Vasculature (WOL) | Columella (PET111) |
|-----------|--------------------------------------------------------------------------------------------------------------------------------------------------------------------------------------------------------------------------------------------------------------------------------------------------------------------------------------------------------------------|--------------------|--------------------------|-----------------|-----------------------------|-------------------|--------------------|
| AT1G16350 | inosine-5'-monophosphate dehydrogenase, putative, strong similarity to SP:P47996 gb:L34684 inosine monophosphate dehydrogenase (IMPDH) from Arabidopsis thaliana; member of the PF:00478 IMP dehydrogenase family                                                                                                                                                  | 0                  | 0                        | 0               | 0                           | 1                 | 0                  |
| AT1G16700 | NADH-ubiquinone oxidoreductase 23 kDa subunit, mitochondrial, putative, very strong similarity to SP:Q42599 NADH-ubiquinone oxidoreductase 23 kDa subunit, mitochondrial precursor (EC 1.6.5.3) (EC 1.6.99.3) (Complex I-23KD) (CI-23KD) (Complex I-28.5KD) (CI-28.5KD) {Arabidopsis thaliana}; contains Pfam profile PF00037: iron-sulfur cluster-binding protein | 0                  | 0                        | 0               | 1                           | 1                 | 1                  |
| AT1G17290 | ALAAT1__alanine aminotransferase, putative, similar to alanine aminotransferase from Panicum miliaceum (SP:P34106), GB:AAC62456 GI:3694807 from (Zea mays), GI:4730884 from Oryza sativa                                                                                                                                                                           | 1                  | 1                        | 1               | 1                           | 1                 | 1                  |
| AT1G17745 | PGDH__D-3-phosphoglycerate dehydrogenase / 3-PGDH, identical to SP:O04130                                                                                                                                                                                                                                                                                          | 1                  | 1                        | 0               | 0                           | 1                 | 0                  |
| AT1G17890 | GDP-4-keto-6-deoxy-D-mannose-3,5-epimerase-4-reductase, putative, similar to GDP-4-keto-6-deoxy-D-mannose-3,5-epimerase-4-reductase (GER1)GI:6016479 from (Arabidopsis thaliana)                                                                                                                                                                                   | 1                  | 0                        | 0               | 0                           | 0                 | 0                  |
| AT1G18500 | 2-isopropylmalate synthase, putative, strong similarity to 2-isopropylmalate synthase (IMS1) (Arabidopsis thaliana) GI:12330687; contains Pfam profile PF00682: HMGL-like                                                                                                                                                                                          | 1                  | 1                        | 0               | 0                           | 1                 | 0                  |
| AT1G18640 | PSP__3-phosphoserine phosphatase (PSP), nearly identical to 3-phosphoserine phosphatase GI:3759177 from (Arabidopsis thaliana)                                                                                                                                                                                                                                     | 1                  | 0                        | 0               | 1                           | 0                 | 0                  |
| AT1G19440 | very-long-chain fatty acid condensing enzyme, putative, similar to GB:AAD37122 from (Arabidopsis thaliana)                                                                                                                                                                                                                                                         | 0                  | 0                        | 0               | 0                           | 1                 | 0                  |

**Supplementary Tables pertaining to Figure 2**

**Supplementary Table S8. Proteins of the root cellular proteome that are in the AraCyc Plant Metabolic Network**

| Locus     | Annotation                                                                                                                                                                                                                                         | Root Hairs (COBL9) | Non-Hair Epidermis (WER) | Cortex (CORTEX) | Endodermis/ Quiescent (SCR) | Vasculature (WOL) | Columella (PET111) |
|-----------|----------------------------------------------------------------------------------------------------------------------------------------------------------------------------------------------------------------------------------------------------|--------------------|--------------------------|-----------------|-----------------------------|-------------------|--------------------|
| AT1G19580 | bacterial transferase hexapeptide repeat-containing protein, contains Pfam profile PF00132: Bacterial transferase hexapeptide (four repeats)                                                                                                       | 1                  | 0                        | 1               | 1                           | 0                 | 1                  |
| AT1G19920 | APS2_ASA1_AMT1_TRP5_WEI2__sulfate adenylyltransferase 2 / ATP-sulfurylase 2 (ASA1) (MET3-1) (APS2), identical to ATP sulfurylase (APS2) (Arabidopsis thaliana) GI:1575324                                                                          | 0                  | 0                        | 0               | 0                           | 1                 | 0                  |
| AT1G20510 | 4-coumarate--CoA ligase family protein / 4-coumaroyl-CoA synthase family protein, similar to SP:P14912 and SP:P14913 from Petroselinum crispum; contains Pfam AMP-binding enzyme domain PF00501                                                    | 1                  | 1                        | 0               | 0                           | 0                 | 0                  |
| AT1G20575 | dolichyl-phosphate beta-D-mannosyltransferase, putative / dolichol-phosphate mannosyltransferase, putative / mannose-P-dolichol synthase, putative, similar to DPM1 from Homo sapiens (SP:O60762); member of glycosyltransferase family 2          | 1                  | 0                        | 1               | 1                           | 1                 | 1                  |
| AT1G20620 | CAT3_SEN2_ATSEN2__catalase 3 (SEN2), almost identical to catalase 3 SP:Q42547, GI:3123188 from (Arabidopsis thaliana); identical to catalase 3 (SEN2) mRNA, partial cds GI:3158369                                                                 | 0                  | 0                        | 1               | 0                           | 0                 | 0                  |
| AT1G20630 | CAT1__catalase 1, identical to catalase 1 GI:2511725 from (Arabidopsis thaliana)                                                                                                                                                                   | 0                  | 0                        | 0               | 0                           | 0                 | 1                  |
| AT1G20950 | pyrophosphate--fructose-6-phosphate 1-phosphotransferase-related / pyrophosphate-dependent 6-phosphofructose-1-kinase-related, similar to pyrophosphate--fructose 6-phosphate 1-phosphotransferase alpha subunit SP:Q41140 from (Ricinus communis) | 0                  | 0                        | 0               | 0                           | 1                 | 0                  |

**Supplementary Tables pertaining to Figure 2**

**Supplementary Table S8. Proteins of the root cellular proteome that are in the AraCyc Plant Metabolic Network**

| Locus     | Annotation                                                                                                                                                                                                                                                                                                                                                    | Root Hairs (COBL9) | Non-Hair Epidermis (WER) | Cortex (CORTEX) | Endodermis/ Quiescent (SCR) | Vasculature (WOL) | Columella (PET111) |
|-----------|---------------------------------------------------------------------------------------------------------------------------------------------------------------------------------------------------------------------------------------------------------------------------------------------------------------------------------------------------------------|--------------------|--------------------------|-----------------|-----------------------------|-------------------|--------------------|
| AT1G22410 | 2-dehydro-3-deoxyphosphoheptonate aldolase, putative / 3-deoxy-D-arabino-heptulosonate 7-phosphate synthase, putative / DAHP synthetase, putative, similar to 3-deoxy-D-arabino-heptulosonate 7-phosphate GI:170224 from ( <i>Nicotiana tabacum</i> ), SP:P21357 from <i>Solanum tuberosum</i> ; contains Pfam Class-II DAHP synthetase family domain PF01474 | 1                  | 1                        | 1               | 1                           | 1                 | 0                  |
| AT1G22450 | COX6B_ATCOX6B2__cytochrome c oxidase subunit 6b, putative (COX6b), nearly identical to subunit 6b of cytochrome c oxidase ( <i>Arabidopsis thaliana</i> ) GI:6518353                                                                                                                                                                                          | 1                  | 1                        | 1               | 0                           | 1                 | 0                  |
| AT1G23190 | phosphoglucomutase, cytoplasmic, putative / glucose phosphomutase, putative, strong similarity to SP:P93805 Phosphoglucomutase, cytoplasmic 2 (EC 5.4.2.2) (Glucose phosphomutase 2) (PGM 2) { <i>Zea mays</i> }; contains InterPro accession IPR006352: Phosphoglucosamine mutase                                                                            | 1                  | 0                        | 0               | 0                           | 1                 | 1                  |
| AT1G23310 | GGT1_AOAT1__glutamate:glyoxylate aminotransferase 1 (GGT1), identical to glutamate:glyoxylate aminotransferase 1 ( <i>Arabidopsis thaliana</i> ) GI:24461827; similar to alanine aminotransferase GI:4730884 from ( <i>Oryza sativa</i> ); contains Pfam profile PF00155: aminotransferase, classes I and II                                                  | 0                  | 0                        | 0               | 0                           | 0                 | 1                  |
| AT1G23820 | SPDS1__spermidine synthase 1 (SPDSYN1) / putrescine aminopropyltransferase 1, identical to SP:Q9ZUB3 Spermidine synthase 1 (EC 2.5.1.16) (Putrescine aminopropyltransferase 1) (SPDSY 1) { <i>Arabidopsis thaliana</i> }                                                                                                                                      | 1                  | 0                        | 1               | 1                           | 1                 | 0                  |



## Supplementary Tables pertaining to Figure 2

### Supplementary Table S8. Proteins of the root cellular proteome that are in the AraCyc Plant Metabolic Network

| Locus     | Annotation                                                                                                                                                                                                                                                                                 | Root Hairs<br>(COBL9) | Non-Hair<br>Epidermis<br>(WER) | Cortex<br>(CORTEX) | Endodermis/<br>Quiescent<br>(SCR) | Vasculature<br>(WOL) | Columella<br>(PET111) |
|-----------|--------------------------------------------------------------------------------------------------------------------------------------------------------------------------------------------------------------------------------------------------------------------------------------------|-----------------------|--------------------------------|--------------------|-----------------------------------|----------------------|-----------------------|
| AT1G24180 | IAR4__pyruvate dehydrogenase E1 component alpha subunit, mitochondrial, putative, similar to SP:P52901 Pyruvate dehydrogenase E1 component alpha subunit, mitochondrial precursor (EC 1.2.4.1) (PDHE1-A) {Arabidopsis thaliana}; contains Pfam profile PF00676: Dehydrogenase E1 component | 1                     | 1                              | 1                  | 1                                 | 1                    | 1                     |
| AT1G24280 | G6PD3__Encodes a plastidic glucose-6-phosphate dehydrogenase that is sensitive to reduction by DTT and whose mRNA is most highly expressed in root.                                                                                                                                        | 0                     | 1                              | 0                  | 0                                 | 0                    | 0                     |
| AT1G24360 | 3-oxoacyl-(acyl-carrier protein) reductase, chloroplast / 3-ketoacyl-acyl carrier protein reductase, identical to 3-oxoacyl-(acyl-carrier protein) reductase SP:P33207 from (Arabidopsis thaliana)                                                                                         | 1                     | 1                              | 1                  | 1                                 | 1                    | 1                     |
| AT1G27450 | APT1_APRT_APT_ATAPT1_ATAPT1__adenine phosphoribosyltransferase 1 (APT1), nearly identical to SP:P31166 Adenine phosphoribosyltransferase 1 (EC 2.4.2.7) (APRT) {Arabidopsis thaliana}                                                                                                      | 1                     | 0                              | 0                  | 0                                 | 0                    | 1                     |
| AT1G27680 | APL2__glucose-1-phosphate adenylyltransferase large subunit 2 (APL2) / ADP-glucose pyrophosphorylase, identical to SP:P55230                                                                                                                                                               | 1                     | 0                              | 1                  | 0                                 | 0                    | 0                     |
| AT1G28130 | GH3.17__encodes an IAA-amido synthase that conjugates Asp and other amino acids to auxin in vitro. Lines carrying insertions in this gene are hypersensitive to auxin.                                                                                                                     | 0                     | 0                              | 0                  | 0                                 | 0                    | 1                     |
| AT1G29880 | glycyl-tRNA synthetase / glycine--tRNA ligase, identical to SP:O23627 Glycyl-tRNA synthetase (EC 6.1.1.14) (Glycine--tRNA ligase) (GlyRS) {Arabidopsis thaliana}                                                                                                                           | 1                     | 0                              | 0                  | 0                                 | 1                    | 0                     |

**Supplementary Tables pertaining to Figure 2**

**Supplementary Table S8. Proteins of the root cellular proteome that are in the AraCyc Plant Metabolic Network**

| Locus     | Annotation                                                                                                                                                                                                                                                                                                                                                                   | Root Hairs (COBL9) | Non-Hair Epidermis (WER) | Cortex (CORTEX) | Endodermis/ Quiescent (SCR) | Vasculature (WOL) | Columella (PET111) |
|-----------|------------------------------------------------------------------------------------------------------------------------------------------------------------------------------------------------------------------------------------------------------------------------------------------------------------------------------------------------------------------------------|--------------------|--------------------------|-----------------|-----------------------------|-------------------|--------------------|
| AT1G29900 | CARB__carbamoyl-phosphate synthase family protein, similar to carbamoylphosphate synthetase GI:6552726 from ( <i>Medicago sativa</i> ); contains Pfam profiles PF02786: Carbamoyl-phosphate synthase L chain ATP binding domain, PF00289: Carbamoyl-phosphate synthase L chain N-terminal domain, PF02787: Carbamoyl-phosphate synthetase large chain oligomerisation domain | 1                  | 1                        | 1               | 1                           | 1                 | 1                  |
| AT1G30120 | PDH-E1 BETA__pyruvate dehydrogenase E1 component beta subunit, chloroplast, identical to pyruvate dehydrogenase E1 beta subunit ( <i>Arabidopsis thaliana</i> ) GI:2454184; identical to cDNA pyruvate dehydrogenase E1 beta subunit mRNA, nuclear gene encoding plastid protein GI:2454183                                                                                  | 0                  | 0                        | 0               | 1                           | 0                 | 1                  |
| AT1G30620 | MUR4_UXE1__UDP-D-xylose 4-epimerase, putative (MUR4), similar to SP:P55180 UDP-glucose 4-epimerase (EC 5.1.3.2) from <i>Bacillus subtilis</i> , GI:3021357 UDP-galactose 4-epimerase from <i>Cyamopsis tetragonoloba</i> ; contains Pfam profile PF01370 NAD dependent epimerase/dehydratase family; contains TIGRfam profile TIGR01179: UDP-glucose 4-epimerase             | 0                  | 0                        | 0               | 0                           | 1                 | 1                  |
| AT1G31180 | 3-isopropylmalate dehydrogenase, chloroplast, putative, strong similarity to SP:P29102 3-isopropylmalate dehydrogenase, chloroplast precursor { <i>Brassica napus</i> }; EST gb:F14478 comes from this gene                                                                                                                                                                  | 1                  | 1                        | 1               | 0                           | 1                 | 1                  |
| AT1G31220 | phosphoribosylglycinamide formyltransferase, similar to phosphoribosylglycinamide formyltransferase, chloroplast precursor ( <i>Arabidopsis thaliana</i> ) SWISS-PROT:P52422                                                                                                                                                                                                 | 1                  | 0                        | 0               | 0                           | 1                 | 0                  |

**Supplementary Tables pertaining to Figure 2**

**Supplementary Table S8. Proteins of the root cellular proteome that are in the AraCyc Plant Metabolic Network**

| Locus     | Annotation                                                                                                                                                                                                                                                                                                             | Root Hairs (COBL9) | Non-Hair Epidermis (WER) | Cortex (CORTEX) | Endodermis/ Quiescent (SCR) | Vasculature (WOL) | Columella (PET111) |
|-----------|------------------------------------------------------------------------------------------------------------------------------------------------------------------------------------------------------------------------------------------------------------------------------------------------------------------------|--------------------|--------------------------|-----------------|-----------------------------|-------------------|--------------------|
| AT1G31230 | AK-HSDH I__bifunctional aspartate kinase/homoserine dehydrogenase / AK-HSDH, nearly identical to gb:X71364 (PIR:S46497) aspartate kinase / homoserine dehydrogenase from <i>Arabidopsis thaliana</i> ; contains ACT domain                                                                                             | 0                  | 1                        | 0               | 1                           | 0                 | 1                  |
| AT1G31860 | AT-IE__histidine biosynthesis bifunctional protein (HISIE), identical to histidine biosynthesis bifunctional protein hisIE, chloroplast (precursor) SP: O82768 from ( <i>Arabidopsis thaliana</i> ); identical to cDNA phosphoribosyl-ATP pyrophosphohydrolase GI:3461883                                              | 1                  | 0                        | 0               | 0                           | 0                 | 0                  |
| AT1G32380 | ribose-phosphate pyrophosphokinase 2 / phosphoribosyl diphosphate synthetase 2 (PRS2), identical to SP:Q42583 from ( <i>Arabidopsis thaliana</i> ); strong similarity to phosphoribosyl diphosphate synthetase 1 (ribose-phosphate pyrophosphokinase 1 (PRS I) ( <i>Arabidopsis thaliana</i> ) GI:633140, SP:Q42581    | 1                  | 1                        | 0               | 0                           | 0                 | 0                  |
| AT1G32440 | pyruvate kinase, putative, similar to pyruvate kinase isozyme G, chloroplast precursor ( <i>Nicotiana tabacum</i> ) SWISS-PROT:Q40546                                                                                                                                                                                  | 1                  | 0                        | 1               | 0                           | 0                 | 0                  |
| AT1G34430 | EMB3003__dihydrolipoamide S-acetyltransferase, putative, similar to dihydrolipoamide S-acetyltransferase (LTA2) ( <i>Arabidopsis thaliana</i> ) GI:5881963; contains Pfam profiles PF00198: 2-oxo acid dehydrogenases acyltransferase (catalytic domain), PF00364: Biotin-requiring enzyme, PF02817: e3 binding domain | 1                  | 1                        | 1               | 1                           | 1                 | 1                  |
| AT1G35580 | beta-fructofuranosidase, putative / invertase, putative / saccharase, putative / beta-fructosidase, putative, similar to neutral invertase ( <i>Daucus carota</i> ) GI:4200165; contains Pfam profile PF04853: Plant neutral invertase                                                                                 | 0                  | 0                        | 0               | 0                           | 1                 | 1                  |

**Supplementary Tables pertaining to Figure 2**

**Supplementary Table S8. Proteins of the root cellular proteome that are in the AraCyc Plant Metabolic Network**

| Locus     | Annotation                                                                                                                                                                                                                                                                                                                     | Root Hairs (COBL9) | Non-Hair Epidermis (WER) | Cortex (CORTEX) | Endodermis/ Quiescent (SCR) | Vasculature (WOL) | Columella (PET111) |
|-----------|--------------------------------------------------------------------------------------------------------------------------------------------------------------------------------------------------------------------------------------------------------------------------------------------------------------------------------|--------------------|--------------------------|-----------------|-----------------------------|-------------------|--------------------|
| AT1G44170 | ALDH3H1_ALDH4__aldehyde dehydrogenase, putative (ALDH), similar to aldehyde dehydrogenase ALDH (Craterostigma plantagineum) gi:17065918:emb:CAC84900                                                                                                                                                                           | 1                  | 0                        | 1               | 0                           | 1                 | 1                  |
| AT1G47260 | APFI__bacterial transferase hexapeptide repeat-containing protein, contains Pfam profile PF00132: Bacterial transferase hexapeptide (four repeats)                                                                                                                                                                             | 1                  | 1                        | 1               | 1                           | 1                 | 1                  |
| AT1G47420 | expressed protein, identical to hypothetical protein GB:AAD46040 GI:5668814 from (Arabidopsis thaliana)                                                                                                                                                                                                                        | 1                  | 0                        | 1               | 0                           | 1                 | 1                  |
| AT1G48600 | phosphoethanolamine N-methyltransferase 2, putative (NMT2), very similar to :PEM2_ARATH Putative phosphoethanolamine N-methyltransferase 2 (EC 2.1.1.103) (SP:Q944H0){Arabidopsis thaliana}; very similar to Halotolerance protein Hal3b (SP:P94063)(Arabidopsis thaliana); to similar to GB:AAF61950 from (Spinacia oleracea) | 0                  | 0                        | 0               | 1                           | 0                 | 0                  |
| AT1G48850 | EMB1144__chorismate synthase, putative / 5-enolpyruvylshikimate-3-phosphate phospholyase, putative, similar to chorismate synthase from Lycopersicon esculentum (SP:Q42884), Corydalis sempervirens (SP:P27793); contains Pfam chorismate synthase domain PF01264                                                              | 1                  | 1                        | 0               | 1                           | 0                 | 1                  |
| AT1G48860 | 3-phosphoshikimate 1-carboxyvinyltransferase, putative / 5-enolpyruvylshikimate-3-phosphate, putative / EPSP synthase, putative, strong similarity to 5-enolpyruvylshikimate-3-phosphate (EPSP) synthase SP:P05466 from (Arabidopsis thaliana)                                                                                 | 1                  | 0                        | 0               | 1                           | 0                 | 0                  |

**Supplementary Tables pertaining to Figure 2**

**Supplementary Table S8. Proteins of the root cellular proteome that are in the AraCyc Plant Metabolic Network**

| Locus     | Annotation                                                                                                                                                                                                                                                                                                                                                                                                       | Root Hairs (COBL9) | Non-Hair Epidermis (WER) | Cortex (CORTEX) | Endodermis/Quiescent (SCR) | Vasculature (WOL) | Columella (PET111) |
|-----------|------------------------------------------------------------------------------------------------------------------------------------------------------------------------------------------------------------------------------------------------------------------------------------------------------------------------------------------------------------------------------------------------------------------|--------------------|--------------------------|-----------------|----------------------------|-------------------|--------------------|
| AT1G49140 | NADH-ubiquinone oxidoreductase-related, similar to NADH-ubiquinone oxidoreductase 12 kDa subunit, mitochondrial precursor (EC 1.6.5.3) (EC 1.6.99.3) (Complex I-12KD) (CI-12KD). (Swiss-Prot:Q03015) ( <i>Neurospora crassa</i> )                                                                                                                                                                                | 1                  | 0                        | 0               | 0                          | 0                 | 0                  |
| AT1G50200 | ALATS_ACD__aminoacyl-tRNA synthetase family protein, contains Pfam profiles: PF01411 tRNA synthetases class II (A), PF02272 DHHA1 domain                                                                                                                                                                                                                                                                         | 1                  | 0                        | 1               | 1                          | 1                 | 0                  |
| AT1G53000 | cytidyltransferase family, contains Pfam profile: PF02348 cytidyltransferase                                                                                                                                                                                                                                                                                                                                     | 1                  | 1                        | 1               | 0                          | 1                 | 1                  |
| AT1G53240 | malate dehydrogenase (NAD), mitochondrial, identical to mitochondrial NAD-dependent malate dehydrogenase GI:3929649 SP:Q9ZP06 from ( <i>Arabidopsis thaliana</i> ); contains InterPro entry IPR001236: Lactate/malate dehydrogenase                                                                                                                                                                              | 1                  | 1                        | 1               | 1                          | 1                 | 1                  |
| AT1G53840 | ATPME1__pectinesterase family protein, contains Pfam profile: PF01095 pectinesterase                                                                                                                                                                                                                                                                                                                             | 1                  | 1                        | 1               | 0                          | 1                 | 0                  |
| AT1G54100 | ALDH7B4__aldehyde dehydrogenase, putative / antiquitin, putative, strong similarity to SP:Q41247 Aldehyde dehydrogenase family 7 member A1 (EC 1.2.1.3) (Antiquitin 1) ( <i>Brassica turgor-responsive/drought-induced gene 26 protein</i> ) (Btg-26) ( <i>Brassica napus</i> ); similar to turgor-responsive protein 26G (aldehyde dehydrogenase family 7 member A1) ( <i>Pisum sativum</i> ) SWISS-PROT:P25795 | 1                  | 0                        | 0               | 0                          | 1                 | 0                  |
| AT1G54220 | dihydrolipoamide S-acetyltransferase, putative, similar to dihydrolipoamide S-acetyltransferase GI:5669871 ( <i>Zea mays</i> ); contains Pfam profiles PF00198: 2-oxo acid dehydrogenases acyltransferase (catalytic domain), PF00364: Biotin-requiring enzyme, PF02817: e3 binding domain                                                                                                                       | 1                  | 1                        | 0               | 0                          | 0                 | 0                  |

**Supplementary Tables pertaining to Figure 2**

**Supplementary Table S8. Proteins of the root cellular proteome that are in the AraCyc Plant Metabolic Network**

| Locus     | Annotation                                                                                                                                                                                                                                                                                                                                          | Root Hairs (COBL9) | Non-Hair Epidermis (WER) | Cortex (CORTEX) | Endodermis/ Quiescent (SCR) | Vasculature (WOL) | Columella (PET111) |
|-----------|-----------------------------------------------------------------------------------------------------------------------------------------------------------------------------------------------------------------------------------------------------------------------------------------------------------------------------------------------------|--------------------|--------------------------|-----------------|-----------------------------|-------------------|--------------------|
| AT1G55850 | ATCSLE1_CSLE1__cellulose synthase family protein, similar to cellulose synthase catalytic subunit (gi:13925881) from <i>Nicotiana glauca</i> , cellulose synthase-5 (gi:9622882) from <i>Zea mays</i>                                                                                                                                               | 1                  | 1                        | 1               | 0                           | 0                 | 0                  |
| AT1G56190 | phosphoglycerate kinase, putative, similar to SP:P41758 Phosphoglycerate kinase, chloroplast precursor (EC 2.7.2.3) { <i>Chlamydomonas reinhardtii</i> }; contains Pfam profile PF00162: phosphoglycerate kinase                                                                                                                                    | 1                  | 1                        | 1               | 1                           | 1                 | 0                  |
| AT1G58080 | ATATP-PRT1_ATATP-PRT2__ATP phosphoribosyl transferase 1 (ATP-PRT1), identical to ATP phosphoribosyl transferase GI:6683617 from ( <i>Arabidopsis thaliana</i> )                                                                                                                                                                                     | 1                  | 0                        | 1               | 0                           | 0                 | 0                  |
| AT1G59900 | AT-E1 ALPHA__pyruvate dehydrogenase E1 component alpha subunit, mitochondrial (PDHE1-A), identical to SP:P52901 Pyruvate dehydrogenase E1 component alpha subunit, mitochondrial precursor (EC 1.2.4.1) (PDHE1-A) { <i>Arabidopsis thaliana</i> }                                                                                                   | 1                  | 0                        | 0               | 0                           | 0                 | 1                  |
| AT1G62640 | KAS III__3-oxoacyl-(acyl-carrier-protein) synthase III, chloroplast / beta-ketoacyl-ACP synthase III / 3-ketoacyl-acyl carrier protein synthase III (KAS III), identical to SP:P49243 3-oxoacyl-(acyl-carrier-protein) synthase III, chloroplast precursor (EC 2.3.1.41) (Beta-ketoacyl-ACP synthase III) (KAS III) { <i>Arabidopsis thaliana</i> } | 1                  | 1                        | 1               | 1                           | 1                 | 0                  |
| AT1G63000 | NRS/ER__expressed protein                                                                                                                                                                                                                                                                                                                           | 1                  | 1                        | 0               | 0                           | 1                 | 1                  |
| AT1G63050 | membrane bound O-acyl transferase (MBOAT) family protein, low similarity to porcupine from ( <i>Xenopus laevis</i> ) GI:6714514, GI:6714520, GI:6714518, GI:6714516; contains Pfam profile PF03062: MBOAT family                                                                                                                                    | 0                  | 0                        | 0               | 1                           | 0                 | 0                  |

**Supplementary Tables pertaining to Figure 2**

**Supplementary Table S8. Proteins of the root cellular proteome that are in the AraCyc Plant Metabolic Network**

| Locus     | Annotation                                                                                                                                                                                                                                                                                                | Root Hairs (COBL9) | Non-Hair Epidermis (WER) | Cortex (CORTEX) | Endodermis/ Quiescent (SCR) | Vasculature (WOL) | Columella (PET111) |
|-----------|-----------------------------------------------------------------------------------------------------------------------------------------------------------------------------------------------------------------------------------------------------------------------------------------------------------|--------------------|--------------------------|-----------------|-----------------------------|-------------------|--------------------|
| AT1G63660 | GMP synthase (glutamine-hydrolyzing), putative / glutamine amidotransferase, putative, similar to SP:P38625 GMP synthase (glutamine-hydrolyzing) (EC 6.3.5.2) (Glutamine amidotransferase) (GMP synthetase) {Saccharomyces cerevisiae}; contains Pfam profile PF00117: glutamine amidotransferase class-I | 0                  | 0                        | 0               | 0                           | 1                 | 0                  |
| AT1G64190 | 6-phosphogluconate dehydrogenase family protein, contains Pfam profiles: PF00393 6-phosphogluconate dehydrogenase C-terminal domain, PF03446 NAD binding domain of 6-phosphogluconate                                                                                                                     | 1                  | 1                        | 1               | 1                           | 1                 | 1                  |
| AT1G66430 | pfkB-type carbohydrate kinase family protein, contains Pfam profile: PF00294 pfkB family carbohydrate kinase                                                                                                                                                                                              | 0                  | 0                        | 0               | 0                           | 1                 | 0                  |
| AT1G67560 | lipoxygenase family protein, similar to 13-lipoxygenase GB:CAA65269 (Solanum tuberosum), gi:1654140 (Lycopersicon esculentum)                                                                                                                                                                             | 0                  | 1                        | 0               | 0                           | 0                 | 0                  |
| AT1G67730 | b-keto acyl reductase, putative (GLOSSY8), similar to b-keto acyl reductase GI:2586127 from (Hordeum vulgare)                                                                                                                                                                                             | 1                  | 1                        | 1               | 1                           | 1                 | 1                  |
| AT1G69640 | acid phosphatase, putative, similar to GI:5360721 from (Lupinus albus)                                                                                                                                                                                                                                    | 1                  | 0                        | 0               | 0                           | 1                 | 0                  |
| AT1G69740 | porphobilinogen synthase, putative / delta-aminolevulinic acid dehydratase, putative, similar to delta-aminolevulinic acid dehydratase (Alad) GI:493019 (SP:P43210) from Glycine max, SP:P24493 from Spinacia oleracea, SP:P30124 from Pisum sativum                                                      | 0                  | 0                        | 1               | 0                           | 1                 | 0                  |

## Supplementary Tables pertaining to Figure 2

### Supplementary Table S8. Proteins of the root cellular proteome that are in the AraCyc Plant Metabolic Network

| Locus     | Annotation                                                                                                                                                                                                                                                                                                                                           | Root Hairs (COBL9) | Non-Hair Epidermis (WER) | Cortex (CORTEX) | Endodermis/ Quiescent (SCR) | Vasculature (WOL) | Columella (PET111) |
|-----------|------------------------------------------------------------------------------------------------------------------------------------------------------------------------------------------------------------------------------------------------------------------------------------------------------------------------------------------------------|--------------------|--------------------------|-----------------|-----------------------------|-------------------|--------------------|
| AT1G69830 | AMY3_ATAMY3__Encodes a plastid-localized $\alpha$ -amylase. Expression is reduced in the SEX4 mutant. Loss of function mutations show normal diurnal pattern of starch accumulation/degradation. Expression follows circadian rhythms.                                                                                                               | 0                  | 0                        | 0               | 0                           | 0                 | 1                  |
| AT1G70310 | SPDS2__spermidine synthase 2 (SPDSYN2) / putrescine aminopropyltransferase 2, identical to SP:O48661 Spermidine synthase 2 (EC 2.5.1.16) (Putrescine aminopropyltransferase 2) (SPDSY 2) { <i>Arabidopsis thaliana</i> }                                                                                                                             | 1                  | 0                        | 0               | 1                           | 0                 | 0                  |
| AT1G70410 | carbonic anhydrase, putative / carbonate dehydratase, putative, similar to SP:P42737 Carbonic anhydrase 2 (EC 4.2.1.1) (Carbonate dehydratase 2) { <i>Arabidopsis thaliana</i> }; contains Pfam profile PF00484: Carbonic anhydrase                                                                                                                  | 1                  | 0                        | 0               | 0                           | 0                 | 0                  |
| AT1G70580 | AOAT2_GGT2__glutamate:glyoxylate aminotransferase 2 (GGT2), identical to glutamate:glyoxylate aminotransferase 2 ( <i>Arabidopsis thaliana</i> ) GI:24461829; similar to alanine aminotransferase from <i>Panicum miliaceum</i> (SP:P34106), GI:4730884 from <i>Oryza sativa</i> ; contains Pfam profile PF00155: aminotransferase, classes I and II | 0                  | 0                        | 0               | 0                           | 1                 | 0                  |
| AT1G70730 | phosphoglucomutase, cytoplasmic, putative / glucose phosphomutase, putative, strong similarity to SP:P93804 Phosphoglucomutase, cytoplasmic 1 (EC 5.4.2.2) (Glucose phosphomutase 1) (PGM 1) { <i>Zea mays</i> }; contains InterPro accession IPR006352: Phosphoglucosamine mutase                                                                   | 1                  | 0                        | 0               | 0                           | 0                 | 0                  |
| AT1G74030 | enolase, putative, similar to Swiss-Prot:P15007 enolase (EC 4.2.1.11) (2-phosphoglycerate dehydratase)(2-phospho-D- glycerate hydro-lyase) ( <i>Drosophila melanogaster</i> )                                                                                                                                                                        | 1                  | 1                        | 0               | 1                           | 0                 | 1                  |



**Supplementary Tables pertaining to Figure 2**

**Supplementary Table S8. Proteins of the root cellular proteome that are in the AraCyc Plant Metabolic Network**

| Locus     | Annotation                                                                                                                                                                                                                                                          | Root Hairs (COBL9) | Non-Hair Epidermis (WER) | Cortex (CORTEX) | Endodermis/Quiescent (SCR) | Vasculature (WOL) | Columella (PET111) |
|-----------|---------------------------------------------------------------------------------------------------------------------------------------------------------------------------------------------------------------------------------------------------------------------|--------------------|--------------------------|-----------------|----------------------------|-------------------|--------------------|
| AT1G74260 | AIR synthase-related family protein, contains Pfam profiles: PF00586 AIR synthase related protein, N-terminal domain, PF02769 AIR synthase related protein, C-terminal domain                                                                                       | 1                  | 1                        | 1               | 1                          | 1                 | 0                  |
| AT1G74920 | ALDH10A8__betaine-aldehyde dehydrogenase, putative, identical to betaine-aldehyde dehydrogenase, chloroplast precursor (BADH) (Arabidopsis thaliana) SWISS-PROT:Q9S795; strong similarity to betaine aldehyde dehydrogenase (Amaranthus hypochondriacus) GI:2388710 | 1                  | 0                        | 0               | 0                          | 0                 | 0                  |
| AT1G74960 | FAB1_KAS2__3-ketoacyl-ACP synthase, putative, similar to 3-ketoacyl-ACP synthase (Cuphea pulcherrima) gi:3800747:gb:AAC68860; identical to cDNA beta-ketoacyl-ACP synthetase 2 nuclear gene for plastid product GI:14582700                                         | 1                  | 1                        | 0               | 0                          | 0                 | 0                  |
| AT1G75270 | dehydroascorbate reductase, putative, similar to GI:6939839 from (Oryza sativa)                                                                                                                                                                                     | 1                  | 0                        | 0               | 1                          | 0                 | 1                  |
| AT1G75330 | OTC__ornithine carbamoyltransferase, chloroplast / ornithine transcarbamylase / OTCase (OTC), identical to SP:O50039 Ornithine carbamoyltransferase, chloroplast precursor (EC 2.1.3.3) (OTCase) (Ornithine transcarbamylase) {Arabidopsis thaliana}                | 1                  | 1                        | 0               | 0                          | 1                 | 1                  |
| AT1G75680 | glycosyl hydrolase family 9 protein, similar to endo-beta-1,4-glucanase GB:AAC12685 GI:3025470 from (Pinus radiata)                                                                                                                                                 | 0                  | 1                        | 1               | 0                          | 1                 | 0                  |

**Supplementary Tables pertaining to Figure 2**

**Supplementary Table S8. Proteins of the root cellular proteome that are in the AraCyc Plant Metabolic Network**

| Locus     | Annotation                                                                                                                                                                                                                                                                                                                                                                                                                                                                                                                                                                                                                                                                                                                                                                                                              | Root Hairs (COBL9) | Non-Hair Epidermis (WER) | Cortex (CORTEX) | Endodermis/ Quiescent (SCR) | Vasculature (WOL) | Columella (PET111) |
|-----------|-------------------------------------------------------------------------------------------------------------------------------------------------------------------------------------------------------------------------------------------------------------------------------------------------------------------------------------------------------------------------------------------------------------------------------------------------------------------------------------------------------------------------------------------------------------------------------------------------------------------------------------------------------------------------------------------------------------------------------------------------------------------------------------------------------------------------|--------------------|--------------------------|-----------------|-----------------------------|-------------------|--------------------|
| AT1G76490 | HMG1_HMGR1__similar to 3-hydroxy-3-methylglutaryl-CoA reductase 2 / HMG-CoA reductase 2 (HMGR2) [Arabidopsis thaliana] (TAIR:At2g17370.1); similar to 3-hydroxy-3-methylglutaryl coenzyme A reductase [Hevea brasiliensis] (GB:AAU08214.1); similar to HMG-CoA reductase [Cucumis melo] (GB:BAA36291.1); similar to 3-hydroxy-3-methylglutaryl-coenzyme A reductase [Hevea brasiliensis] (GB:AAQ63055.1); similar to hydroxymethylglutaryl-CoA reductase (NADPH) [Raphanus sativus] (GB:CAA48610.1); similar to 3-hydroxy-3-methylglutaryl coenzyme A reductase; HMG-CoA reductase; EuHMGR [Eucommia ulmoides] (GB:AAV54051.1); contains InterPro domain 3-hydroxy-3-methylglutaryl Coenzyme A reductase (InterPro:IPR004554); contains InterPro domain Hydroxymethylglutaryl-coenzyme A reductase (InterPro:IPR002202) | 0                  | 0                        | 1               | 1                           | 0                 | 0                  |
| AT1G76550 | pyrophosphate--fructose-6-phosphate 1-phosphotransferase alpha subunit, putative / pyrophosphate-dependent 6-phosphofructose-1-kinase, putative, strong similarity to SP:Q41140 Pyrophosphate--fructose 6-phosphate 1-phosphotransferase alpha subunit (EC 2.7.1.90) (PFP) (PPI-PFK) {Ricinus communis}; contains Pfam profile PF00365: Phosphofructokinase                                                                                                                                                                                                                                                                                                                                                                                                                                                             | 0                  | 0                        | 0               | 1                           | 0                 | 0                  |
| AT1G77590 | LACS9__long-chain-fatty-acid--CoA ligase family protein / long-chain acyl-CoA synthetase family protein (LACS9), similar to LACS 3 (SP:O95573) from Homo Sapiens, LACS 3 (SP:Q63151) from Rattus norvegicus; contains Pfam HMM hit: AMP-binding enzymes PF00501                                                                                                                                                                                                                                                                                                                                                                                                                                                                                                                                                         | 1                  | 0                        | 1               | 1                           | 1                 | 0                  |

**Supplementary Tables pertaining to Figure 2**

**Supplementary Table S8. Proteins of the root cellular proteome that are in the AraCyc Plant Metabolic Network**

| Locus     | Annotation                                                                                                                                                                                                                                                                      | Root Hairs (COBL9) | Non-Hair Epidermis (WER) | Cortex (CORTEX) | Endodermis/ Quiescent (SCR) | Vasculature (WOL) | Columella (PET111) |
|-----------|---------------------------------------------------------------------------------------------------------------------------------------------------------------------------------------------------------------------------------------------------------------------------------|--------------------|--------------------------|-----------------|-----------------------------|-------------------|--------------------|
| AT1G78570 | RHM1__NAD-dependent epimerase/dehydratase family protein, similar to dTDP-glucose 4,6-dehydratase from Aneurinibacillus thermoaerophilus GI:16357461, RmlB from Leptospira borgpetersenii GI:4234803; contains Pfam profile PF01370 NAD dependent epimerase/dehydratase family  | 0                  | 0                        | 1               | 0                           | 1                 | 0                  |
| AT1G78660 | ATGGH1__gamma-glutamyl hydrolase, putative / gamma-Glu-X carboxypeptidase, putative / conjugase, putative, similar to SP:O65355 Gamma-glutamyl hydrolase precursor (EC 3.4.19.9) (Gamma-Glu-X carboxypeptidase) (Conjugase) (GH) {Arabidopsis thaliana}                         | 1                  | 0                        | 0               | 0                           | 0                 | 0                  |
| AT1G78920 | AVP2__vacuolar-type H <sup>+</sup> -translocating inorganic pyrophosphatase (AVPL1), identical to vacuolar-type H <sup>+</sup> -translocating inorganic pyrophosphatase GI:6901676 from (Arabidopsis thaliana)                                                                  | 1                  | 1                        | 1               | 0                           | 1                 | 1                  |
| AT1G79010 | NADH-ubiquinone oxidoreductase 23 kDa subunit, mitochondrial (TYKY), identical to SP:Q42599 NADH-ubiquinone oxidoreductase 23 kDa subunit, mitochondrial precursor (EC 1.6.5.3) (EC 1.6.99.3) (Complex I-23KD) (CI-23KD) (Complex I- 28.5KD) (CI-28.5KD) {Arabidopsis thaliana} | 1                  | 1                        | 1               | 0                           | 1                 | 1                  |
| AT1G79230 | ST1_ATMST1_ATRDH1_MST1__mercaptopyruvate sulfurtransferase (MST1) (RDH1), identical to mercaptopyruvate sulfurtransferase GI:6009981 and thiosulfate sulfurtransferase GI:5834508 from (Arabidopsis thaliana)                                                                   | 1                  | 1                        | 1               | 0                           | 1                 | 1                  |

**Supplementary Tables pertaining to Figure 2**

**Supplementary Table S8. Proteins of the root cellular proteome that are in the AraCyc Plant Metabolic Network**

| Locus     | Annotation                                                                                                                                                                                                                                                                                                                                                                                                                                  | Root Hairs (COBL9) | Non-Hair Epidermis (WER) | Cortex (CORTEX) | Endodermis/ Quiescent (SCR) | Vasculature (WOL) | Columella (PET111) |
|-----------|---------------------------------------------------------------------------------------------------------------------------------------------------------------------------------------------------------------------------------------------------------------------------------------------------------------------------------------------------------------------------------------------------------------------------------------------|--------------------|--------------------------|-----------------|-----------------------------|-------------------|--------------------|
| AT1G79440 | ALDH5F1_SSADH_SSADH1__succinate-semialdehyde dehydrogenase (SSADH1), similar to succinate-semialdehyde dehydrogenase (NADP+) (SSDH) (Escherichia coli) SWISS-PROT:P25526; identical to succinic semialdehyde dehydrogenase mRNA, nuclear gene encoding mitochondrial protein GI:6684441; contains TIGRfam profile TIGR01780:succinic semialdehyde dehydrogenase; contains Pfam profile PF00171: aldehyde dehydrogenase (NAD) family protein | 1                  | 1                        | 1               | 0                           | 1                 | 1                  |
| AT1G79500 | KDSA__2-dehydro-3-deoxyphosphooctonate aldolase / phospho-2-dehydro-3-deoxyoctonate aldolase / 3-deoxy-D-manno-octulosonic acid 8-phosphate synthetase (KDSA), identical to Swiss-Prot:Q9AV97 2-dehydro-3-deoxyphosphooctonate aldolase (EC 4.1.2.16) (Phospho-2- dehydro-3-deoxyoctonate aldolase) (3-deoxy-D-manno-octulosonic acid 8-phosphate synthetase) (KDO-8-phosphate synthetase) (KDO 8-P synthase) (Arabidopsis thaliana)        | 0                  | 0                        | 0               | 0                           | 1                 | 0                  |
| AT1G79530 | GAPC__glyceraldehyde 3-phosphate dehydrogenase, cytosolic, putative / NAD-dependent glyceraldehyde-3-phosphate dehydrogenase, putative, similar to glyceraldehyde-3-phosphate dehydrogenase (Pinus sylvestris) GI:1100223; contains Pfam profiles PF02800: Glyceraldehyde 3-phosphate dehydrogenase C-terminal domain, PF00044: Glyceraldehyde 3-phosphate dehydrogenase NAD binding domain                                                 | 1                  | 1                        | 1               | 1                           | 1                 | 1                  |

**Supplementary Tables pertaining to Figure 2**

**Supplementary Table S8. Proteins of the root cellular proteome that are in the AraCyc Plant Metabolic Network**

| Locus     | Annotation                                                                                                                                                                                                                                                                                                                                                      | Root Hairs (COBL9) | Non-Hair Epidermis (WER) | Cortex (CORTEX) | Endodermis/ Quiescent (SCR) | Vasculature (WOL) | Columella (PET111) |
|-----------|-----------------------------------------------------------------------------------------------------------------------------------------------------------------------------------------------------------------------------------------------------------------------------------------------------------------------------------------------------------------|--------------------|--------------------------|-----------------|-----------------------------|-------------------|--------------------|
| AT1G79550 | PGK__phosphoglycerate kinase, putative, similar to SP:P41758 Phosphoglycerate kinase, chloroplast precursor (EC 2.7.2.3) {Chlamydomonas reinhardtii}; contains Pfam profile PF00162: phosphoglycerate kinase                                                                                                                                                    | 1                  | 1                        | 1               | 1                           | 1                 | 1                  |
| AT1G79690 | ATNUDT3__MutT/nudix family protein, contains Pfam NUDIX domain (PF00293); very low similarity to Chain A and Chain B of Escherichia coli isopentenyl diphosphate:dimethylallyl diphosphate isomerase (gi:15826361) (gi:15826360)                                                                                                                                | 1                  | 1                        | 1               | 0                           | 1                 | 0                  |
| AT1G80230 | cytochrome c oxidase family protein, contains Pfam domain, PF01215: Cytochrome c oxidase subunit Vb                                                                                                                                                                                                                                                             | 1                  | 0                        | 1               | 0                           | 1                 | 1                  |
| AT1G80560 | 3-isopropylmalate dehydrogenase, chloroplast, putative, strong similarity to 3-ISOPROPYLMALATE DEHYDROGENASE PRECURSOR GB:P29102 SP:P29102 from (Brassica napus)                                                                                                                                                                                                | 1                  | 1                        | 1               | 0                           | 1                 | 1                  |
| AT1G80600 | acetylornithine aminotransferase, mitochondrial, putative / acetylornithine transaminase, putative / AOTA, putative / ACOAT, putative, similar to SP:O04866 Acetylornithine aminotransferase, mitochondrial precursor (EC 2.6.1.11) (ACOAT) (Acetylornithine transaminase) (AOTA) {Alnus glutinosa}; contains Pfam profile PF00202: aminotransferase, class III | 1                  | 1                        | 1               | 1                           | 1                 | 1                  |
| AT2G01140 | fructose-bisphosphate aldolase, putative, similar to plastidic aldolase NPALDP1 from Nicotiana paniculata (GI:4827251); contains Pfam profile PF00274 Fructose-bisphosphate aldolase class-I                                                                                                                                                                    | 1                  | 1                        | 1               | 1                           | 1                 | 1                  |

**Supplementary Tables pertaining to Figure 2**

**Supplementary Table S8. Proteins of the root cellular proteome that are in the AraCyc Plant Metabolic Network**

| Locus     | Annotation                                                                                                                                                                                                                                                                                                                                                                                        | Root Hairs (COBL9) | Non-Hair Epidermis (WER) | Cortex (CORTEX) | Endodermis/ Quiescent (SCR) | Vasculature (WOL) | Columella (PET111) |
|-----------|---------------------------------------------------------------------------------------------------------------------------------------------------------------------------------------------------------------------------------------------------------------------------------------------------------------------------------------------------------------------------------------------------|--------------------|--------------------------|-----------------|-----------------------------|-------------------|--------------------|
| AT2G02050 | NADH-ubiquinone oxidoreductase B18 subunit, putative, contains Pfam PF05676: NADH-ubiquinone oxidoreductase B18 subunit (NDUFB7); similar to NADH-ubiquinone oxidoreductase B18 subunit (EC 1.6.5.3) (EC 1.6.99.3) (Complex I-B18) (CI-B18) (Cell adhesion protein SQM1) (Swiss-Prot:P17568) (Homo sapiens); similar to NADH:ubiquinone oxidoreductase NDUFB7 subunit (GI:9651635) (Homo sapiens) | 1                  | 0                        | 1               | 0                           | 1                 | 1                  |
| AT2G04350 | long-chain-fatty-acid--CoA ligase family protein / long-chain acyl-CoA synthetase family protein (LACS8), similar to LACS 4 (SP:O35547) from Rattus norvegicus, LACS 4 (SP:O60488) from Homo sapiens; contains Pfam HMM hit: AMP-binding enzymes PF00501                                                                                                                                          | 0                  | 0                        | 0               | 0                           | 0                 | 1                  |
| AT2G04400 | indole-3-glycerol phosphate synthase (IGPS), nearly identical to SP:P49572                                                                                                                                                                                                                                                                                                                        | 1                  | 1                        | 0               | 1                           | 0                 | 1                  |
| AT2G05710 | aconitate hydratase, cytoplasmic, putative / citrate hydro-lyase/aconitase, putative, nearly identical to SP:P49608 Aconitate hydratase, cytoplasmic (EC 4.2.1.3) (Citrate hydro-lyase) (Aconitase) {Cucurbita maxima}; contains Pfam profiles PF00330: Aconitase family (aconitate hydratase), PF00694: Aconitase C-terminal domain                                                              | 1                  | 1                        | 1               | 1                           | 1                 | 1                  |
| AT2G05990 | ENR1_ENR-A_MOD1_ENR1__enoyl-(acyl-carrier protein) reductase (NADH), chloroplast, putative / NADH-dependent enoyl-ACP reductase, putative, strong similarity to enoyl-(acyl-carrier protein) reductase (NADH) SP:P80030 from (Brassica napus)                                                                                                                                                     | 1                  | 1                        | 1               | 1                           | 1                 | 1                  |

**Supplementary Tables pertaining to Figure 2**

**Supplementary Table S8. Proteins of the root cellular proteome that are in the AraCyc Plant Metabolic Network**

| Locus     | Annotation                                                                                                                                                                                                                                                                                     | Root Hairs (COBL9) | Non-Hair Epidermis (WER) | Cortex (CORTEX) | Endodermis/ Quiescent (SCR) | Vasculature (WOL) | Columella (PET111) |
|-----------|------------------------------------------------------------------------------------------------------------------------------------------------------------------------------------------------------------------------------------------------------------------------------------------------|--------------------|--------------------------|-----------------|-----------------------------|-------------------|--------------------|
| AT2G06050 | OPR3_OPDA-REDUCTASE__12-oxophytodienoate reductase (OPR3) / delayed dehiscence1 (DDE1), nearly identical to DELAYED DEHISCENCE1 (GI:7688991) and to OPR3 (GI:10242314); contains Pfam profile PF00724:oxidoreductase, FAD/FMN-binding; identical to cDNA OPDA-reductase homolog GI:5059114     | 1                  | 1                        | 1               | 0                           | 1                 | 1                  |
| AT2G07050 | CAS1__cycloartenol synthase (CAS1) / 2,3-epoxysqualene--cycloartenol cyclase / (S)-2,3-epoxysqualene mutase, identical to cycloartenol synthase (SP:P38605 : GI:452446) (PMID:7505443)                                                                                                         | 1                  | 1                        | 1               | 1                           | 1                 | 1                  |
| AT2G14170 | ALDH6B2__methylmalonate-semialdehyde dehydrogenase, putative, similar to methylmalonate-semialdehyde dehydrogenase (acylating), mitochondrial precursor (MMSDH) (Rattus norvegicus) SWISS-PROT:Q02253                                                                                          | 1                  | 1                        | 1               | 1                           | 1                 | 1                  |
| AT2G15620 | NIR1_ATHNIR_NIR__ferredoxin--nitrite reductase, putative, strong similarity to ferredoxin-nitrite reductase (Nicotiana tabacum) GI:19893; contains Pfam profiles PF03460: Nitrite/Sulfite reductase ferredoxin-like half domain, PF01077: Nitrite and sulphite reductase 4Fe-4S domain         | 1                  | 0                        | 1               | 0                           | 1                 | 1                  |
| AT2G16570 | ATASE_ATASE1__amidophosphoribosyltransferase / glutamine phosphoribosylpyrophosphate amidotransferase / phosphoribosyldiphosphate 5-amidotransferase, identical to amidophosphoribosyltransferase (Arabidopsis thaliana) GI:469193; identical to cDNA amidophosphoribosyltransferase GI:469192 | 1                  | 0                        | 0               | 0                           | 0                 | 0                  |

**Supplementary Tables pertaining to Figure 2**

**Supplementary Table S8. Proteins of the root cellular proteome that are in the AraCyc Plant Metabolic Network**

| Locus     | Annotation                                                                                                                                                                                                                                                                                                                                                                                                                                                                                                                                                                                                                                                                                                                                                                                                        | Root Hairs (COBL9) | Non-Hair Epidermis (WER) | Cortex (CORTEX) | Endodermis/ Quiescent (SCR) | Vasculature (WOL) | Columella (PET111) |
|-----------|-------------------------------------------------------------------------------------------------------------------------------------------------------------------------------------------------------------------------------------------------------------------------------------------------------------------------------------------------------------------------------------------------------------------------------------------------------------------------------------------------------------------------------------------------------------------------------------------------------------------------------------------------------------------------------------------------------------------------------------------------------------------------------------------------------------------|--------------------|--------------------------|-----------------|-----------------------------|-------------------|--------------------|
| AT2G17130 | IDH2__isocitrate dehydrogenase subunit 2 / NAD+ isocitrate dehydrogenase subunit 2, nearly identical to NAD+ dependent isocitrate dehydrogenase subunit 2 (Arabidopsis thaliana) GI:1766048                                                                                                                                                                                                                                                                                                                                                                                                                                                                                                                                                                                                                       | 1                  | 1                        | 1               | 0                           | 1                 | 1                  |
| AT2G17265 | HSK__homoserine kinase (HSK), identical to homoserine kinase (Arabidopsis thaliana) gi:4927412:gb:AAD33097                                                                                                                                                                                                                                                                                                                                                                                                                                                                                                                                                                                                                                                                                                        | 1                  | 1                        | 0               | 0                           | 0                 | 0                  |
| AT2G17420 | NTRA_ATNTRA_NTR2__similar to thioredoxin reductase 1 / NADPH-dependent thioredoxin reductase 1 (NTR1) [Arabidopsis thaliana] (TAIR:At4g35460.1); similar to NADPH-thioredoxin reductase [Triticum aestivum] (GB:CAD19162.1); contains InterPro domain Thioredoxin reductase (InterPro:IPR005982); contains InterPro domain Pyridine nucleotide-disulphide oxidoreductase, class I (InterPro:IPR001100); contains InterPro domain FAD-dependent pyridine nucleotide-disulphide oxidoreductase (InterPro:IPR001327); contains InterPro domain Pyridine nucleotide-disulphide oxidoreductase, class-II, active site (InterPro:IPR008255); contains InterPro domain Adrenodoxin reductase (InterPro:IPR000759); contains InterPro domain Pyridine nucleotide-disulphide oxidoreductase, class-II (InterPro:IPR000103) | 1                  | 1                        | 1               | 1                           | 1                 | 1                  |
| AT2G17630 | phosphoserine aminotransferase, putative, similar to Phosphoserine aminotransferase, chloroplast precursor (PSAT) (SP:Q96255) (Arabidopsis thaliana); contains TIGRFAM TIGR01364: phosphoserine aminotransferase; contains Pfam PF00266: aminotransferase, class V                                                                                                                                                                                                                                                                                                                                                                                                                                                                                                                                                | 1                  | 1                        | 1               | 0                           | 1                 | 1                  |



## Supplementary Tables pertaining to Figure 2

### Supplementary Table S8. Proteins of the root cellular proteome that are in the AraCyc Plant Metabolic Network

| Locus     | Annotation                                                                                                                                                                                                                                                                                                                                                                                                                                                                                                                 | Root Hairs<br>(COBL9) | Non-Hair<br>Epidermis<br>(WER) | Cortex<br>(CORTEX) | Endodermis/<br>Quiescent<br>(SCR) | Vasculature<br>(WOL) | Columella<br>(PET111) |
|-----------|----------------------------------------------------------------------------------------------------------------------------------------------------------------------------------------------------------------------------------------------------------------------------------------------------------------------------------------------------------------------------------------------------------------------------------------------------------------------------------------------------------------------------|-----------------------|--------------------------------|--------------------|-----------------------------------|----------------------|-----------------------|
| AT2G18230 | inorganic pyrophosphatase (soluble) (PPA) / pyrophosphate phospho-hydrolase / PPase, nearly identical to SP:P21216 Soluble inorganic pyrophosphatase (EC 3.6.1.1) (Pyrophosphate phospho- hydrolase) (PPase) {Arabidopsis thaliana}                                                                                                                                                                                                                                                                                        | 0                     | 0                              | 0                  | 0                                 | 0                    | 1                     |
| AT2G19860 | ATHXK2__hexokinase 2 (HXK2), identical to hexokinase 2 (Arabidopsis thaliana) Swiss-Prot:P93834                                                                                                                                                                                                                                                                                                                                                                                                                            | 1                     | 0                              | 0                  | 0                                 | 0                    | 0                     |
| AT2G19940 | semialdehyde dehydrogenase family protein, similar to N-acetyl-glutamyl-phosphate reductase (Campylobacter jejuni) GI:6650362; contains Pfam profiles PF02774: Semialdehyde dehydrogenase dimerisation domain, PF01118: Semialdehyde dehydrogenase NAD binding domain                                                                                                                                                                                                                                                      | 1                     | 1                              | 1                  | 0                                 | 1                    | 1                     |
| AT2G20360 | expressed protein                                                                                                                                                                                                                                                                                                                                                                                                                                                                                                          | 1                     | 1                              | 1                  | 1                                 | 1                    | 1                     |
| AT2G20370 | MUR3__exostosin family protein, contains Pfam profile: PF03016                                                                                                                                                                                                                                                                                                                                                                                                                                                             | 1                     | 0                              | 0                  | 0                                 | 1                    | 0                     |
| AT2G20420 | succinyl-CoA ligase (GDP-forming) beta-chain, mitochondrial, putative / succinyl-CoA synthetase, beta chain, putative / SCS-beta, putative, identical to SP:O82662 Succinyl-CoA ligase (GDP-forming) beta-chain, mitochondrial precursor (EC 6.2.1.4) (Succinyl-CoA synthetase, beta chain) (SCS-beta) {Arabidopsis thaliana}; similar to SP:O97580 Succinyl-CoA ligase (ADP-forming) beta-chain, mitochondrial precursor (EC 6.2.1.5) {Sus scrofa}; contains Pfam profiles PF00549: CoA-ligase, PF02222: ATP-grasp domain | 1                     | 1                              | 1                  | 1                                 | 1                    | 1                     |
| AT2G20810 | glycosyl transferase family 8 protein, contains Pfam profile: PF01501 glycosyl transferase family 8                                                                                                                                                                                                                                                                                                                                                                                                                        | 0                     | 0                              | 1                  | 0                                 | 1                    | 0                     |

**Supplementary Tables pertaining to Figure 2**

**Supplementary Table S8. Proteins of the root cellular proteome that are in the AraCyc Plant Metabolic Network**

| Locus     | Annotation                                                                                                                                                                                                                                                                                                                                                                                                                   | Root Hairs (COBL9) | Non-Hair Epidermis (WER) | Cortex (CORTEX) | Endodermis/ Quiescent (SCR) | Vasculature (WOL) | Columella (PET111) |
|-----------|------------------------------------------------------------------------------------------------------------------------------------------------------------------------------------------------------------------------------------------------------------------------------------------------------------------------------------------------------------------------------------------------------------------------------|--------------------|--------------------------|-----------------|-----------------------------|-------------------|--------------------|
| AT2G21170 | TIM__triosephosphate isomerase, chloroplast, putative, similar to Triosephosphate isomerase, chloroplast precursor: SP:P48496 from <i>Spinacia oleracea</i> , SP:P46225 from <i>Secale cereale</i>                                                                                                                                                                                                                           | 1                  | 1                        | 1               | 1                           | 1                 | 1                  |
| AT2G21590 | APL4__glucose-1-phosphate adenylyltransferase large subunit, putative / ADP-glucose pyrophosphorylase, putative, strong similarity to SP:P55231                                                                                                                                                                                                                                                                              | 0                  | 0                        | 0               | 0                           | 0                 | 1                  |
| AT2G22230 | beta-hydroxyacyl-ACP dehydratase, putative, similar to beta-hydroxyacyl-ACP dehydratase from <i>Toxoplasma gondii</i> (GI:3850997); contains Pfam profile PF01377 Thioester dehydratase                                                                                                                                                                                                                                      | 0                  | 0                        | 1               | 1                           | 0                 | 1                  |
| AT2G22480 | phosphofructokinase family protein, similar to phosphofructokinase ( <i>Amycolatopsis methanolica</i> ) GI:17432243; contains Pfam profile PF00365: Phosphofructokinase                                                                                                                                                                                                                                                      | 1                  | 1                        | 1               | 1                           | 1                 | 0                  |
| AT2G22780 | PMDH1__malate dehydrogenase, glyoxysomal, putative, strong similarity to glyoxysomal malate dehydrogenase (EC 1.1.1.37) SP:P19446 { <i>Citrullus lanatus</i> }, SP:P46488 { <i>Cucumis sativus</i> }, ( <i>Medicago sativa</i> ) GI:2827078, SP:Q42972 { <i>Oryza sativa</i> }, SP:Q9ZP05 { <i>Arabidopsis thaliana</i> }, SP:P37228 { <i>Glycine max</i> }; contains InterPro entry IPR001236: Lactate/malate dehydrogenase | 1                  | 1                        | 1               | 1                           | 1                 | 1                  |
| AT2G26080 | glycine dehydrogenase (decarboxylating), putative / glycine decarboxylase, putative / glycine cleavage system P-protein, putative, strong similarity to SP:P26969 Glycine dehydrogenase (decarboxylating), mitochondrial precursor (EC 1.4.4.2) { <i>Pisum sativum</i> }; contains Pfam profile PF02347: Glycine cleavage system P-protein                                                                                   | 1                  | 1                        | 1               | 1                           | 1                 | 1                  |
| AT2G26230 | uricase / urate oxidase / nodulin 35, putative, identical to uricase SP:O04420 from ( <i>Arabidopsis thaliana</i> )                                                                                                                                                                                                                                                                                                          | 1                  | 1                        | 1               | 1                           | 1                 | 1                  |

**Supplementary Tables pertaining to Figure 2**

**Supplementary Table S8. Proteins of the root cellular proteome that are in the AraCyc Plant Metabolic Network**

| Locus     | Annotation                                                                                                                                                                                                                                                                                                                                                 | Root Hairs (COBL9) | Non-Hair Epidermis (WER) | Cortex (CORTEX) | Endodermis/ Quiescent (SCR) | Vasculature (WOL) | Columella (PET111) |
|-----------|------------------------------------------------------------------------------------------------------------------------------------------------------------------------------------------------------------------------------------------------------------------------------------------------------------------------------------------------------------|--------------------|--------------------------|-----------------|-----------------------------|-------------------|--------------------|
| AT2G26640 | beta-ketoacyl-CoA synthase, putative, similar to beta-ketoacyl-CoA synthase ( <i>Simmondsia chinensis</i> )(GI:1045614)                                                                                                                                                                                                                                    | 1                  | 0                        | 1               | 0                           | 0                 | 0                  |
| AT2G27730 | expressed protein, contains 1 transmembrane domain; similar to Unknown mitochondrial protein At2g27730 (Swiss-Prot:Q9ZUX4) ( <i>Arabidopsis thaliana</i> ) similar to F1F0-ATPase inhibitor protein (GI:5821432) ( <i>Oryza sativa</i> )                                                                                                                   | 1                  | 1                        | 1               | 0                           | 1                 | 1                  |
| AT2G27860 | AXS1__expressed protein                                                                                                                                                                                                                                                                                                                                    | 1                  | 0                        | 0               | 0                           | 0                 | 1                  |
| AT2G28190 | CSD2_CZSOD2__superoxide dismutase (Cu-Zn), chloroplast (SODCP) / copper/zinc superoxide dismutase (CSD2), identical to GP:3273753:AF061519                                                                                                                                                                                                                 | 1                  | 0                        | 1               | 1                           | 1                 | 1                  |
| AT2G28760 | NAD-dependent epimerase/dehydratase family protein, similar to UDP-glucuronic acid decarboxylase Uxs1p from <i>Filobasidiella neoformans</i> GI:14318327; contains Pfam profile PF01370 NAD dependent epimerase/dehydratase family                                                                                                                         | 0                  | 0                        | 0               | 0                           | 0                 | 1                  |
| AT2G30200 | expressed protein                                                                                                                                                                                                                                                                                                                                          | 1                  | 1                        | 1               | 1                           | 1                 | 1                  |
| AT2G30490 | ATC4H_C4H_CYP73A5__trans-cinnamate 4-monooxygenase / cinnamic acid 4-hydroxylase (C4H) (CA4H) / cytochrome P450 73 (CYP73) (CYP73A5), identical to SP:P92994: Trans-cinnamate 4-monooxygenase (EC 1.14.13.11) (Cinnamic acid 4-hydroxylase) (CA4H) (C4H) (P450C4H) (Cytochrome P450 73). { <i>Arabidopsis thaliana</i> }; molecular marker C4H (GB:U71080) | 1                  | 1                        | 1               | 1                           | 1                 | 1                  |
| AT2G30860 | ATGSTF9_ATGSTF7_GLUTTR__glutathione S-transferase, putative, identical to GB:Y12295                                                                                                                                                                                                                                                                        | 1                  | 0                        | 0               | 1                           | 1                 | 1                  |
| AT2G30870 | ATGSTF10_ATGSTF4_ERD13__glutathione S-transferase, putative, supported by cDNA GI:443698 GB:D17673                                                                                                                                                                                                                                                         | 1                  | 1                        | 1               | 1                           | 1                 | 0                  |

**Supplementary Tables pertaining to Figure 2**

**Supplementary Table S8. Proteins of the root cellular proteome that are in the AraCyc Plant Metabolic Network**

| Locus     | Annotation                                                                                                                                                                                                                                                                                                                       | Root Hairs (COBL9) | Non-Hair Epidermis (WER) | Cortex (CORTEX) | Endodermis/ Quiescent (SCR) | Vasculature (WOL) | Columella (PET111) |
|-----------|----------------------------------------------------------------------------------------------------------------------------------------------------------------------------------------------------------------------------------------------------------------------------------------------------------------------------------|--------------------|--------------------------|-----------------|-----------------------------|-------------------|--------------------|
| AT2G30920 | EMB3002_ATCOQ3_COQ3__hexaprenyldihydroxybenzoate methyltransferase, identical to hexaprenyldihydroxybenzoate methyltransferase SP:O49354 from ( <i>Arabidopsis thaliana</i> )                                                                                                                                                    | 1                  | 0                        | 0               | 0                           | 0                 | 0                  |
| AT2G30970 | ASP1__aspartate aminotransferase, mitochondrial / transaminase A (ASP1), identical to SP:P46643 Aspartate aminotransferase, mitochondrial precursor (EC 2.6.1.1) (Transaminase A) { <i>Arabidopsis thaliana</i> }                                                                                                                | 1                  | 1                        | 1               | 1                           | 1                 | 1                  |
| AT2G31360 | ADS2__delta 9 desaturase (ADS2), identical to delta 9 acyl-lipid desaturase (ADS2) GI:2970036 from ( <i>Arabidopsis thaliana</i> )                                                                                                                                                                                               | 0                  | 0                        | 0               | 0                           | 1                 | 0                  |
| AT2G31390 | STH__pfkB-type carbohydrate kinase family protein, contains Pfam profile: PF00294 pfkB family carbohydrate kinase                                                                                                                                                                                                                | 1                  | 1                        | 1               | 1                           | 1                 | 1                  |
| AT2G33150 | PED1__acetyl-CoA C-acyltransferase, putative / 3-ketoacyl-CoA thiolase, putative, similar to 3-ketoacyl-CoA thiolase (E.C. 2.3.1.16) from ( <i>Arabidopsis thaliana</i> ) GI:2981616, ( <i>Cucumis sativus</i> ) GI:393707, ( <i>Cucurbita</i> cv. Kurokawa Amakuri) GI:1694621; contains InterPro accession IPR002155: Thiolase | 1                  | 1                        | 1               | 1                           | 1                 | 1                  |
| AT2G33220 | expressed protein                                                                                                                                                                                                                                                                                                                | 1                  | 0                        | 1               | 1                           | 1                 | 1                  |
| AT2G34630 | geranyl diphosphate synthase, putative / GPPS, putative / dimethylallyltransferase, putative / prenyl transferase, putative, identical to GI:11322965 <i>A. thaliana</i> geranyl diphosphate synthase                                                                                                                            | 1                  | 1                        | 0               | 0                           | 1                 | 0                  |

**Supplementary Tables pertaining to Figure 2**

**Supplementary Table S8. Proteins of the root cellular proteome that are in the AraCyc Plant Metabolic Network**

| Locus     | Annotation                                                                                                                                                                                                                                                                                                                                                                                              | Root Hairs (COBL9) | Non-Hair Epidermis (WER) | Cortex (CORTEX) | Endodermis/Quiescent (SCR) | Vasculature (WOL) | Columella (PET111) |
|-----------|---------------------------------------------------------------------------------------------------------------------------------------------------------------------------------------------------------------------------------------------------------------------------------------------------------------------------------------------------------------------------------------------------------|--------------------|--------------------------|-----------------|----------------------------|-------------------|--------------------|
| AT2G35040 | AICARFT/IMPCHase bienzyme family protein, similar to SP:P12048 Bifunctional purine biosynthesis protein purH (Includes: Phosphoribosylaminoimidazolecarboxamide formyltransferase (EC 2.1.2.3) (AICAR transformylase); IMP cyclohydrolase (EC 3.5.4.10) (Inosinicase) (IMP synthetase) (ATIC)) {Bacillus subtilis}; contains Pfam profiles PF01808: AICARFT/IMPCHase bienzyme, PF02142: MGS-like domain | 1                  | 1                        | 1               | 0                          | 1                 | 0                  |
| AT2G35120 | glycine cleavage system H protein, mitochondrial, putative, similar to SP:Q39732 Glycine cleavage system H protein, mitochondrial precursor {Flaveria anomala}; contains Pfam profile PF01597: Glycine cleavage H-protein                                                                                                                                                                               | 1                  | 0                        | 1               | 0                          | 0                 | 0                  |
| AT2G36460 | fructose-bisphosphate aldolase, putative, similar to PIR:S65073 fructose-bisphosphate aldolase (EC 4.1.2.13) isoenzyme C-1, cytosolic (Oryza sativa); contains Pfam profile PF00274 Fructose-bisphosphate aldolase class-I                                                                                                                                                                              | 0                  | 0                        | 0               | 0                          | 0                 | 1                  |
| AT2G36530 | LOS2__enolase, identical to SWISS-PROT:P25696 enolase (EC 4.2.1.11) (2-phosphoglycerate dehydratase)(2-phospho-D-glycerate hydro-lyase) (Arabidopsis thaliana)                                                                                                                                                                                                                                          | 1                  | 1                        | 1               | 1                          | 1                 | 1                  |
| AT2G36580 | pyruvate kinase, putative, similar to pyruvate kinase, cytosolic isozyme (Glycine max) SWISS-PROT:Q42806                                                                                                                                                                                                                                                                                                | 0                  | 0                        | 0               | 0                          | 1                 | 0                  |
| AT2G36880 | S-adenosylmethionine synthetase, putative, similar to S-adenosylmethionine synthetase 3 (Methionine adenosyltransferase 3, AdoMet synthetase 3) (Lycopersicon esculentum) SWISS-PROT:P43282                                                                                                                                                                                                             | 0                  | 1                        | 1               | 0                          | 1                 | 0                  |
| AT2G37040 | PAL1__phenylalanine ammonia-lyase 1 (PAL1), nearly identical to SP:P35510                                                                                                                                                                                                                                                                                                                               | 0                  | 0                        | 0               | 0                          | 1                 | 0                  |

**Supplementary Tables pertaining to Figure 2**

**Supplementary Table S8. Proteins of the root cellular proteome that are in the AraCyc Plant Metabolic Network**

| Locus     | Annotation                                                                                                                                                                                                                                                                                                   | Root Hairs (COBL9) | Non-Hair Epidermis (WER) | Cortex (CORTEX) | Endodermis/ Quiescent (SCR) | Vasculature (WOL) | Columella (PET111) |
|-----------|--------------------------------------------------------------------------------------------------------------------------------------------------------------------------------------------------------------------------------------------------------------------------------------------------------------|--------------------|--------------------------|-----------------|-----------------------------|-------------------|--------------------|
| AT2G37250 | ADK_ATPADK1__adenylate kinase family protein, contains Pfam profile: PF00406 adenylate kinase                                                                                                                                                                                                                | 1                  | 1                        | 0               | 0                           | 1                 | 0                  |
| AT2G37690 | phosphoribosylaminoimidazole carboxylase, putative / AIR carboxylase, putative, similar to SP:P55195 Phosphoribosylaminoimidazole carboxylase, chloroplast precursor (EC 4.1.1.21) (AIR carboxylase) (AIRC) {Vigna aconitifolia}; contains Pfam profiles PF02222: ATP-grasp domain, PF00731: AIR carboxylase | 1                  | 1                        | 1               | 1                           | 1                 | 0                  |
| AT2G38040 | CAC3__acetyl co-enzyme A carboxylase carboxyltransferase alpha subunit family, contains Pfam profile: PF03255: Acetyl co-enzyme A carboxylase carboxyltransferase alpha subunit                                                                                                                              | 1                  | 1                        | 1               | 1                           | 1                 | 1                  |
| AT2G38280 | FAC1__AMP deaminase, putative / myoadenylate deaminase, putative, similar to SP:P15274 AMP deaminase (EC 3.5.4.6) (Myoadenylate deaminase) {Saccharomyces cerevisiae}; contains Pfam profile PF00962: Adenosine/AMP deaminase                                                                                | 1                  | 0                        | 0               | 1                           | 0                 | 0                  |
| AT2G38650 | glycosyl transferase family 8 protein, contains Pfam profile: PF01501 glycosyl transferase family 8                                                                                                                                                                                                          | 1                  | 0                        | 0               | 0                           | 0                 | 0                  |
| AT2G38670 | ethanolamine-phosphate cytidyltransferase, putative / phosphorylethanolamine transferase, putative / CTP:phosphoethanolamine cytidyltransferase, putative, similar to SP:Q99447 Ethanolamine-phosphate cytidyltransferase (EC 2.7.7.14) {Homo sapiens}; contains Pfam profile PF01467: Cytidyltransferase    | 1                  | 1                        | 0               | 0                           | 0                 | 1                  |
| AT2G39800 | P5CS1_ATP5CS__delta 1-pyrroline-5-carboxylate synthetase A / P5CS A (P5CS1), identical to SP:P54887:P5C1_ARATH                                                                                                                                                                                               | 0                  | 0                        | 1               | 0                           | 0                 | 0                  |

**Supplementary Tables pertaining to Figure 2**

**Supplementary Table S8. Proteins of the root cellular proteome that are in the AraCyc Plant Metabolic Network**

| Locus     | Annotation                                                                                                                                                                                                                                             | Root Hairs (COBL9) | Non-Hair Epidermis (WER) | Cortex (CORTEX) | Endodermis/ Quiescent (SCR) | Vasculature (WOL) | Columella (PET111) |
|-----------|--------------------------------------------------------------------------------------------------------------------------------------------------------------------------------------------------------------------------------------------------------|--------------------|--------------------------|-----------------|-----------------------------|-------------------|--------------------|
| AT2G40840 | DPE2__glycoside hydrolase family 77 protein, contains Pfam profiles PF02446: 4-alpha-glucanotransferase, PF00686: Starch binding domain; contains a non-consensus AT-AC intron between at intron 5                                                     | 1                  | 0                        | 0               | 0                           | 0                 | 1                  |
| AT2G40890 | CYP98A3_REF8__cytochrome P450 98A3, putative (CYP98A3), identical to Cytochrome P450 98A3 (SP:O22203) ( <i>Arabidopsis thaliana</i> ); similar to gi:17978651 from <i>Pinus taeda</i>                                                                  | 0                  | 0                        | 1               | 0                           | 0                 | 0                  |
| AT2G41220 | GLU2__glutamate synthase, chloroplast (GLU2) / ferredoxin-dependent glutamate synthase (Fd-GOGAT 2), identical to SP:Q9T0P4 Ferredoxin-dependent glutamate synthase 2, chloroplast precursor (EC 1.4.7.1) (Fd-GOGAT 2) { <i>Arabidopsis thaliana</i> } | 1                  | 1                        | 1               | 1                           | 1                 | 1                  |
| AT2G41530 | esterase, putative, similar to SP:P10768 Esterase D (EC 3.1.1.1) { <i>Homo sapiens</i> }; contains Pfam profile: PF00756 putative esterase                                                                                                             | 1                  | 0                        | 1               | 1                           | 1                 | 0                  |
| AT2G42790 | CSY3__citrate synthase, glyoxysomal, putative, strong similarity to SP:P49299 Citrate synthase, glyoxysomal precursor { <i>Cucurbita maxima</i> }; contains Pfam profile PF00285: Citrate synthase                                                     | 1                  | 0                        | 0               | 0                           | 0                 | 1                  |
| AT2G42910 | ribose-phosphate pyrophosphokinase 4 / phosphoribosyl diphosphate synthetase 4 (PRS4), identical to phosphoribosyl diphosphate synthase (prs4) ( <i>Arabidopsis thaliana</i> ) GI:4902472                                                              | 1                  | 0                        | 0               | 1                           | 1                 | 0                  |
| AT2G43350 | ATGPX3__glutathione peroxidase, putative                                                                                                                                                                                                               | 0                  | 1                        | 0               | 0                           | 0                 | 0                  |
| AT2G43360 | BIO2_BIOB__biotin synthase (BioB) (BIO2), identical to SP:P54967 Pfam profile PF04055: radical SAM domain protein                                                                                                                                      | 1                  | 0                        | 0               | 0                           | 1                 | 0                  |

**Supplementary Tables pertaining to Figure 2**

**Supplementary Table S8. Proteins of the root cellular proteome that are in the AraCyc Plant Metabolic Network**

| Locus     | Annotation                                                                                                                                                                                                                                                                                                                                                                         | Root Hairs (COBL9) | Non-Hair Epidermis (WER) | Cortex (CORTEX) | Endodermis/ Quiescent (SCR) | Vasculature (WOL) | Columella (PET111) |
|-----------|------------------------------------------------------------------------------------------------------------------------------------------------------------------------------------------------------------------------------------------------------------------------------------------------------------------------------------------------------------------------------------|--------------------|--------------------------|-----------------|-----------------------------|-------------------|--------------------|
| AT2G43710 | SSI2_FAB2__acyl-(acyl-carrier-protein) desaturase / stearoyl-ACP desaturase (SSI2), identical to gi:15149310; contains Pfam profile PF03405: Fatty acid desaturase; identical to cDNA stearoyl ACP desaturase (SSI2), SSI2-FAB2 allele, GI:15149309                                                                                                                                | 1                  | 1                        | 1               | 1                           | 1                 | 0                  |
| AT2G43750 | OASB_ACS1_ATCS-B_CPACS1__cysteine synthase, chloroplast / O-acetylserine (thiol)-lyase / O-acetylserine sulfhydrylase / cpACS1 (OASB), identical to SP:P47999 Cysteine synthase, chloroplast precursor (EC 4.2.99.8) (O-acetylserine sulfhydrylase) (O-acetylserine (Thiol)-lyase) (cpACS1) {Arabidopsis thaliana}; identical to cDNA O-acetylserine lyase (At.OAS.7-4) GI:6983575 | 1                  | 1                        | 1               | 1                           | 1                 | 1                  |
| AT2G44040 | dihydrodipicolinate reductase family protein, weak similarity to SP:Q52419 Dihydrodipicolinate reductase (EC 1.3.1.26) (DHPR) {Pseudomonas syringae} ; contains Pfam profiles PF01113: Dihydrodipicolinate reductase N-terminus, PF05173: Dihydrodipicolinate reductase C-terminus                                                                                                 | 1                  | 0                        | 0               | 0                           | 0                 | 0                  |
| AT2G44050 | COS1__6,7-dimethyl-8-ribityllumazine synthase / DMRL synthase / lumazine synthase / riboflavin synthase, identical to 6,7-dimethyl-8-ribityllumazine synthase, chloroplast (precursor) SP:O80575 from (Arabidopsis thaliana)                                                                                                                                                       | 1                  | 1                        | 1               | 0                           | 1                 | 1                  |
| AT2G44350 | ATCS_CSY4__citrate synthase, mitochondrial, putative, strong similarity to SP:P20115 Citrate synthase, mitochondrial precursor {Arabidopsis thaliana}; contains Pfam profile PF00285: Citrate synthase                                                                                                                                                                             | 1                  | 1                        | 1               | 1                           | 1                 | 1                  |



**Supplementary Tables pertaining to Figure 2**

**Supplementary Table S8. Proteins of the root cellular proteome that are in the AraCyc Plant Metabolic Network**

| Locus     | Annotation                                                                                                                                                                                                                                                                          | Root Hairs (COBL9) | Non-Hair Epidermis (WER) | Cortex (CORTEX) | Endodermis/ Quiescent (SCR) | Vasculature (WOL) | Columella (PET111) |
|-----------|-------------------------------------------------------------------------------------------------------------------------------------------------------------------------------------------------------------------------------------------------------------------------------------|--------------------|--------------------------|-----------------|-----------------------------|-------------------|--------------------|
| AT2G44530 | ribose-phosphate pyrophosphokinase, putative / phosphoribosyl diphosphate synthetase, putative, very strong similarity to phosphoribosyl pyrophosphate synthase ( <i>Spinacia oleracea</i> ) GI:4902849; contains Pfam profile PF00156: Phosphoribosyl transferase domain           | 1                  | 0                        | 1               | 0                           | 0                 | 0                  |
| AT2G45290 | transketolase, putative, strong similarity to transketolase 1 ( <i>Capsicum annuum</i> ) GI:3559814; contains Pfam profiles PF02779: Transketolase, pyridine binding domain, PF02780: Transketolase, C-terminal domain, PF00456: Transketolase, thiamine diphosphate binding domain | 0                  | 1                        | 0               | 1                           | 1                 | 0                  |
| AT2G45300 | 3-phosphoshikimate 1-carboxyvinyltransferase / 5-enolpyruvylshikimate-3-phosphate / EPSP synthase, nearly identical to SP:P05466                                                                                                                                                    | 1                  | 1                        | 0               | 1                           | 1                 | 0                  |
| AT2G45440 | DHDPS2__dihydrodipicolinate synthase 2 (DHDPS2), identical to dihydrodipicolinate synthase 2 (DHDPS2) ( <i>Arabidopsis thaliana</i> ) GI:11066382                                                                                                                                   | 0                  | 1                        | 0               | 0                           | 0                 | 0                  |
| AT2G45790 | eukaryotic phosphomannomutase family protein, contains Pfam profile: PF03332 eukaryotic phosphomannomutase                                                                                                                                                                          | 1                  | 0                        | 0               | 0                           | 1                 | 1                  |
| AT2G47380 | cytochrome c oxidase subunit Vc family protein / COX5C family protein, contains Pfam profile: PF05799 cytochrome c oxidase subunit Vc (COX5C)                                                                                                                                       | 0                  | 0                        | 0               | 0                           | 0                 | 1                  |
| AT2G47510 | FUM1__fumarate hydratase, putative / fumarase, putative, similar to SP:P55250 Fumarate hydratase, mitochondrial precursor (EC 4.2.1.2) (Fumarase) ( <i>Rhizopus oryzae</i> ); contains Pfam profile PF00206: Lyase                                                                  | 1                  | 1                        | 1               | 1                           | 1                 | 1                  |

**Supplementary Tables pertaining to Figure 2**

**Supplementary Table S8. Proteins of the root cellular proteome that are in the AraCyc Plant Metabolic Network**

| Locus     | Annotation                                                                                                                                                                                                                                                                                                                                          | Root Hairs (COBL9) | Non-Hair Epidermis (WER) | Cortex (CORTEX) | Endodermis/ Quiescent (SCR) | Vasculature (WOL) | Columella (PET111) |
|-----------|-----------------------------------------------------------------------------------------------------------------------------------------------------------------------------------------------------------------------------------------------------------------------------------------------------------------------------------------------------|--------------------|--------------------------|-----------------|-----------------------------|-------------------|--------------------|
| AT2G47650 | UXS4__NAD-dependent epimerase/dehydratase family protein, similar to UDP-glucuronic acid decarboxylase Uxs1p from <i>Filobasidiella neoformans</i> GI:14318327; contains Pfam profile PF01370 NAD dependent epimerase/dehydratase family; contains non-consensus AT donor splice site at exon 1 and non-consensus AC acceptor splice site at exon 2 | 1                  | 0                        | 1               | 1                           | 1                 | 1                  |
| AT3G01910 | SOX__sulfite oxidase, putative, similar to sulfite oxidase GB:3212610 SP:P07850 ( <i>Gallus gallus</i> ), Moco containing protein ( <i>Oryza sativa</i> (japonica cultivar-group)) GI:22759584; contains Pfam profiles: PF00174: Oxidoreductase molybdopterin binding domain and PF03404: Mo-co oxidoreductase dimerisation domain                  | 1                  | 1                        | 1               | 0                           | 1                 | 0                  |
| AT3G02350 | glycosyl transferase family 8 protein, contains Pfam profile: PF01501 glycosyl transferase family 8                                                                                                                                                                                                                                                 | 1                  | 1                        | 1               | 0                           | 1                 | 0                  |
| AT3G02360 | 6-phosphogluconate dehydrogenase family protein, contains Pfam profiles: PF00393 6-phosphogluconate dehydrogenase C-terminal domain, PF03446 NAD binding domain of 6-phosphogluconate ;similar to 6-phosphogluconate dehydrogenase GB:BAA22812 GI:2529229 ( <i>Glycine max</i> )                                                                    | 1                  | 0                        | 0               | 1                           | 1                 | 0                  |
| AT3G02630 | acyl-(acyl-carrier-protein) desaturase, putative / stearoyl-ACP desaturase, putative, similar to Acyl-(acyl-carrier protein) desaturase from <i>Sesamum indicum</i> GI:575942, <i>Cucumis sativus</i> SP:P32061, <i>Ricinus communis</i> SP:P22337; contains Pfam profile PF03405 Fatty acid desaturase                                             | 1                  | 1                        | 0               | 1                           | 1                 | 0                  |

**Supplementary Tables pertaining to Figure 2**

**Supplementary Table S8. Proteins of the root cellular proteome that are in the AraCyc Plant Metabolic Network**

| Locus     | Annotation                                                                                                                                                                                                                                                                                                                                                                    | Root Hairs (COBL9) | Non-Hair Epidermis (WER) | Cortex (CORTEX) | Endodermis/ Quiescent (SCR) | Vasculature (WOL) | Columella (PET111) |
|-----------|-------------------------------------------------------------------------------------------------------------------------------------------------------------------------------------------------------------------------------------------------------------------------------------------------------------------------------------------------------------------------------|--------------------|--------------------------|-----------------|-----------------------------|-------------------|--------------------|
| AT3G02780 | IPP2_IDI2_IPIAT1__isopentenyl-diphosphate delta-isomerase II / isopentenyl diphosphate:dimethylallyl diphosphate isomerase II (IPP2), identical to isopentenyl diphosphate:dimethylallyl diphosphate isomerase (IPP2) GB:U49259 (Arabidopsis thaliana)                                                                                                                        | 1                  | 0                        | 1               | 0                           | 1                 | 1                  |
| AT3G03050 | ATCSLD3_KOJAK_CSLD3_ATCSLD3_KJK__cellulose synthase family protein (CsID3), similar to cellulose synthase catalytic subunit gi:2827143 from (Arabidopsis thaliana), cellulose synthase-7 (gi:9622886) from Zea mays; contains Pfam profile PF03552: Cellulose synthase                                                                                                        | 1                  | 0                        | 0               | 0                           | 0                 | 0                  |
| AT3G03100 | NADH:ubiquinone oxidoreductase family protein, contains Pfam PF05071: NADH:ubiquinone oxidoreductase 17.2 kD subunit; similar to ethylene-regulated ER6 protein (GI:5669654) (Lycopersicon esculentum); identical to Probable NADH-ubiquinone oxidoreductase subunit B17.2 (EC 1.6.5.3) (EC 1.6.99.3) (Complex I-B17.2) (CI-B17.2) (Swiss-Prot:Q9M9M9) (Arabidopsis thaliana) | 1                  | 0                        | 1               | 1                           | 1                 | 1                  |
| AT3G03250 | UGP__Is thought to encodes a cytosolic UDP-glucose pyrophosphorylase with strong similarity to UTP--glucose-1-phosphate uridylyltransferase (SwissProt P19595, EC 2.7.7.9, UDP-glucose pyrophosphorylase Solanum tuberosum).                                                                                                                                                  | 1                  | 1                        | 1               | 1                           | 1                 | 1                  |
| AT3G04120 | GAPC__glyceraldehyde-3-phosphate dehydrogenase, cytosolic (GAPC) / NAD-dependent glyceraldehyde-3-phosphate dehydrogenase, identical to SP:P25858 Glyceraldehyde 3-phosphate dehydrogenase, cytosolic (EC 1.2.1.12) {Arabidopsis thaliana}                                                                                                                                    | 0                  | 1                        | 0               | 1                           | 0                 | 1                  |
| AT3G04520 | threonine aldolase family protein, similar to L-allo-threonine aldolase SP:O07051 from (Aeromonas jandaei)                                                                                                                                                                                                                                                                    | 0                  | 0                        | 0               | 1                           | 0                 | 0                  |

**Supplementary Tables pertaining to Figure 2**

**Supplementary Table S8. Proteins of the root cellular proteome that are in the AraCyc Plant Metabolic Network**

| Locus     | Annotation                                                                                                                                                                                                                                                                                                                                                                                                          | Root Hairs (COBL9) | Non-Hair Epidermis (WER) | Cortex (CORTEX) | Endodermis/ Quiescent (SCR) | Vasculature (WOL) | Columella (PET111) |
|-----------|---------------------------------------------------------------------------------------------------------------------------------------------------------------------------------------------------------------------------------------------------------------------------------------------------------------------------------------------------------------------------------------------------------------------|--------------------|--------------------------|-----------------|-----------------------------|-------------------|--------------------|
| AT3G04600 | tRNA synthetase class I (W and Y) family protein, contains Pfam profile: PF00579 tRNA synthetases class I (W and Y)                                                                                                                                                                                                                                                                                                 | 0                  | 0                        | 0               | 0                           | 1                 | 0                  |
| AT3G04790 | ribose 5-phosphate isomerase-related, similar to ribose-5-phosphate isomerase GI:18654317 from ( <i>Spinacia oleracea</i> )                                                                                                                                                                                                                                                                                         | 1                  | 0                        | 0               | 1                           | 0                 | 0                  |
| AT3G04940 | ATCYSD1__cysteine synthase, putative / O-acetylserine (thiol)-lyase, putative / O-acetylserine sulfhydrylase, putative, similar to O-acetylserine(thiol) lyase (EC 4.2.99.8) ( <i>Brassica juncea</i> ) GI:2245144; contains Pfam profile PF00291: Pyridoxal-phosphate dependent enzyme                                                                                                                             | 0                  | 0                        | 0               | 0                           | 1                 | 0                  |
| AT3G05970 | LACS6__long-chain-fatty-acid--CoA ligase / long-chain acyl-CoA synthetase (LACS6), strong similarity to AMP-binding protein (MF39P) gi:1617274 from <i>Brassica napus</i> , similar to putative long-chain-fatty-acid--CoA ligase (brain isozyme) GB:P33124 ( <i>Rattus norvegicus</i> ); contains Pfam AMP-binding enzyme domain PF00501; identical to cDNA AtLACS6 for long-chain acyl-CoA synthetase GI:22531705 | 1                  | 1                        | 1               | 0                           | 1                 | 1                  |
| AT3G06350 | EMB3004__dehydroquininate dehydratase, putative / shikimate dehydrogenase, putative, similar to dehydroquininate dehydratase/shikimate dehydrogenase ( <i>Nicotiana tabacum</i> )(GI:535771), dehydroquininate dehydratase/shikimate:NADP oxidoreductase ( <i>Lycopersicon esculentum</i> )(GI:3169883)                                                                                                             | 1                  | 1                        | 0               | 0                           | 1                 | 0                  |
| AT3G06650 | ACLB-1__ATP-citrate synthase, putative / ATP-citrate (pro-S-)-lyase, putative / citrate cleavage enzyme, putative, strong similarity to ATP:citrate lyase ( <i>Capsicum annuum</i> ) GI:13160653; contains Pfam profiles PF00549: CoA-ligase, PF02629: CoA binding domain                                                                                                                                           | 1                  | 0                        | 1               | 0                           | 1                 | 0                  |

**Supplementary Tables pertaining to Figure 2**

**Supplementary Table S8. Proteins of the root cellular proteome that are in the AraCyc Plant Metabolic Network**

| Locus     | Annotation                                                                                                                                                                                                                                                                                                                                                                                              | Root Hairs (COBL9) | Non-Hair Epidermis (WER) | Cortex (CORTEX) | Endodermis/ Quiescent (SCR) | Vasculature (WOL) | Columella (PET111) |
|-----------|---------------------------------------------------------------------------------------------------------------------------------------------------------------------------------------------------------------------------------------------------------------------------------------------------------------------------------------------------------------------------------------------------------|--------------------|--------------------------|-----------------|-----------------------------|-------------------|--------------------|
| AT3G06810 | acyl-CoA dehydrogenase-related, low similarity to acyl-CoA dehydrogenase ( <i>Acinetobacter</i> sp. NCIMB9871) GI:14587418; contains Pfam profiles PF01636: Phosphotransferase enzyme family, PF00441: Acyl-CoA dehydrogenase C-terminal domain, PF02770: Acyl-CoA dehydrogenase middle domain                                                                                                          | 1                  | 1                        | 0               | 0                           | 0                 | 1                  |
| AT3G06860 | MFP2_ATMPF2__fatty acid multifunctional protein (MFP2), identical to fatty acid multifunctional protein ( <i>AtMFP2</i> ) GB:AF123254 (gi:4337027) ( <i>Arabidopsis thaliana</i> ) (fatty acid beta-oxidation); contains Pfam profiles PF02737 (3-hydroxyacyl-CoA dehydrogenase, NAD binding domain), PF00378 (enoyl-CoA hydratase/isomerase family protein), PF00725 (3-hydroxyacyl-CoA dehydrogenase) | 1                  | 1                        | 1               | 0                           | 1                 | 1                  |
| AT3G07630 | prephenate dehydratase family protein, similar to P-protein: chorismate mutase, prephenate dehydratase GB:P43900 ( <i>Haemophilus influenzae</i> )                                                                                                                                                                                                                                                      | 1                  | 0                        | 0               | 0                           | 1                 | 0                  |
| AT3G08590 | 2,3-biphosphoglycerate-independent phosphoglycerate mutase, putative / phosphoglyceromutase, putative, strong similarity to SP:Q42908 2,3-bisphosphoglycerate-independent phosphoglycerate mutase (EC 5.4.2.1) (Phosphoglyceromutase) { <i>Mesembryanthemum crystallinum</i> }; contains Pfam profile PF01676: Metalloenzyme superfamily                                                                | 1                  | 0                        | 1               | 1                           | 1                 | 0                  |
| AT3G08610 | expressed protein                                                                                                                                                                                                                                                                                                                                                                                       | 0                  | 0                        | 0               | 0                           | 0                 | 1                  |
| AT3G09810 | AT3G09805__isocitrate dehydrogenase, putative / NAD+ isocitrate dehydrogenase, putative, strong similarity to isocitrate dehydrogenase (NAD+) GB:CAA65502 GI:3021506 ( <i>Nicotiana tabacum</i> )                                                                                                                                                                                                       | 1                  | 1                        | 0               | 0                           | 1                 | 1                  |

**Supplementary Tables pertaining to Figure 2**

**Supplementary Table S8. Proteins of the root cellular proteome that are in the AraCyc Plant Metabolic Network**

| Locus     | Annotation                                                                                                                                                                                                                                                                                                             | Root Hairs (COBL9) | Non-Hair Epidermis (WER) | Cortex (CORTEX) | Endodermis/ Quiescent (SCR) | Vasculature (WOL) | Columella (PET111) |
|-----------|------------------------------------------------------------------------------------------------------------------------------------------------------------------------------------------------------------------------------------------------------------------------------------------------------------------------|--------------------|--------------------------|-----------------|-----------------------------|-------------------|--------------------|
| AT3G09820 | ADK1__adenosine kinase 1 (ADK1) / adenosine 5'-phosphotransferase 1, identical to adenosine kinase 1 /adenosine 5'-phosphotransferase 1 SP:Q9SF85 from ( <i>Arabidopsis thaliana</i> )                                                                                                                                 | 1                  | 1                        | 0               | 1                           | 1                 | 1                  |
| AT3G10050 | OMR1__threonine ammonia-lyase / threonine dehydratase / threonine deaminase (OMR1), identical to SP:Q9ZSS6 Threonine dehydratase biosynthetic, chloroplast precursor (EC 4.3.1.19, formerly EC 4.2.1.16) (Threonine deaminase) (TD) { <i>Arabidopsis thaliana</i> }                                                    | 1                  | 0                        | 0               | 0                           | 0                 | 0                  |
| AT3G10370 | mitochondrial FAD-dependent glycerol-3-phosphate dehydrogenase. possibly involved in storage lipid catabolism and glycerol assimilation, and in glycerol-3-phosphate shuttle which transports reducing power from cytosol to mitochondrion.                                                                            | 1                  | 0                        | 1               | 0                           | 1                 | 1                  |
| AT3G10920 | MSD1__superoxide dismutase (Mn), mitochondrial (SODA) / manganese superoxide dismutase (MSD1), identical to manganese superoxide dismutase ( <i>Arabidopsis thaliana</i> ) gi:3273751:gb:AAC24832                                                                                                                      | 1                  | 1                        | 1               | 1                           | 1                 | 1                  |
| AT3G11170 | FAD7_FADD__omega-3 fatty acid desaturase, chloroplast (FAD7) (FADD), identical to omega-3 fatty acid desaturase, chloroplast precursor SP:P46310 ( <i>Arabidopsis thaliana</i> (Mouse-ear cress)); identical to Pfam profile PF00487: Fatty acid desaturase; identical to cDNA plastid fatty acid desaturase GI:809491 | 1                  | 0                        | 0               | 0                           | 0                 | 0                  |
| AT3G11710 | lysyl-tRNA synthetase, putative / lysine--tRNA ligase, putative, similar to SP:Q43776 Lysyl-tRNA synthetase (EC 6.1.1.6) (Lysine--tRNA ligase) { <i>Lycopersicon esculentum</i> }; contains Pfam profile PF00152: tRNA synthetases class II (D, K and N)                                                               | 1                  | 0                        | 0               | 0                           | 1                 | 0                  |

**Supplementary Tables pertaining to Figure 2**

**Supplementary Table S8. Proteins of the root cellular proteome that are in the AraCyc Plant Metabolic Network**

| Locus     | Annotation                                                                                                                                                                                                                                                                                                                                                                                                                                                                                                                   | Root Hairs (COBL9) | Non-Hair Epidermis (WER) | Cortex (CORTEX) | Endodermis/ Quiescent (SCR) | Vasculature (WOL) | Columella (PET111) |
|-----------|------------------------------------------------------------------------------------------------------------------------------------------------------------------------------------------------------------------------------------------------------------------------------------------------------------------------------------------------------------------------------------------------------------------------------------------------------------------------------------------------------------------------------|--------------------|--------------------------|-----------------|-----------------------------|-------------------|--------------------|
| AT3G12120 | FAD2__omega-6 fatty acid desaturase, endoplasmic reticulum (FAD2) / delta-12 desaturase, identical to omega-6 fatty acid desaturase, endoplasmic reticulum (FAD2) SP:P46313 (Arabidopsis thaliana (Mouse-ear cress)) (Plant Cell 6:147-158(1994))                                                                                                                                                                                                                                                                            | 1                  | 1                        | 1               | 1                           | 1                 | 0                  |
| AT3G12260 | complex 1 family protein / LVR family protein, contains Pfam PF05347: Complex 1 protein (LYR family)                                                                                                                                                                                                                                                                                                                                                                                                                         | 1                  | 1                        | 1               | 1                           | 1                 | 1                  |
| AT3G12290 | tetrahydrofolate dehydrogenase/cyclohydrolase, putative, similar to SP:P07245 C-1-tetrahydrofolate synthase, cytoplasmic (C1-THF synthase) (Includes: Methylenetetrahydrofolate dehydrogenase (EC 1.5.1.5); Methenyltetrahydrofolate cyclohydrolase (EC 3.5.4.9); Formyltetrahydrofolate synthetase (EC 6.3.4.3)) {Saccharomyces cerevisiae}; contains Pfam profiles PF02882: Tetrahydrofolate dehydrogenase/cyclohydrolase, NAD(P)-binding domain, PF00763: Tetrahydrofolate dehydrogenase/cyclohydrolase, catalytic domain | 1                  | 0                        | 0               | 0                           | 0                 | 0                  |
| AT3G12670 | EMB2742__CTP synthase, putative / UTP--ammonia ligase, putative, similar to SP:P17812 CTP synthase (EC 6.3.4.2) (UTP--ammonia ligase) {Homo sapiens}; contains Pfam profile PF00117: glutamine amidotransferase class-I                                                                                                                                                                                                                                                                                                      | 0                  | 0                        | 0               | 0                           | 1                 | 0                  |
| AT3G12780 | PGK1__phosphoglycerate kinase, putative, similar to SP:P41758 Phosphoglycerate kinase, chloroplast precursor (EC 2.7.2.3) {Chlamydomonas reinhardtii}; contains Pfam profile PF00162: phosphoglycerate kinase                                                                                                                                                                                                                                                                                                                | 1                  | 1                        | 1               | 1                           | 1                 | 1                  |
| AT3G13110 | AtSerat2;2_SAT-1_SAT-A__serine O-acetyltransferase (SAT-1), identical to serine acetyltransferase (Sat-1) GI:1184048 (Arabidopsis thaliana)                                                                                                                                                                                                                                                                                                                                                                                  | 0                  | 1                        | 0               | 0                           | 0                 | 0                  |

**Supplementary Tables pertaining to Figure 2**

**Supplementary Table S8. Proteins of the root cellular proteome that are in the AraCyc Plant Metabolic Network**

| Locus     | Annotation                                                                                                                                                                                                                                                                                                            | Root Hairs (COBL9) | Non-Hair Epidermis (WER) | Cortex (CORTEX) | Endodermis/ Quiescent (SCR) | Vasculature (WOL) | Columella (PET111) |
|-----------|-----------------------------------------------------------------------------------------------------------------------------------------------------------------------------------------------------------------------------------------------------------------------------------------------------------------------|--------------------|--------------------------|-----------------|-----------------------------|-------------------|--------------------|
| AT3G13930 | dihydrolipoamide S-acetyltransferase, putative, similar to dihydrolipoamide S-acetyltransferase (Zea mays) GI:5669871; contains Pfam profiles PF00198: 2-oxo acid dehydrogenases acyltransferase (catalytic domain), PF00364: Biotin-requiring enzyme, PF02817: e3 binding domain                                     | 1                  | 1                        | 1               | 1                           | 1                 | 1                  |
| AT3G14390 | diaminopimelate decarboxylase, putative / DAP carboxylase, putative, similar to diaminopimelate decarboxylase (Arabidopsis thaliana) GI:6562332; contains Pfam profiles PF02784: Pyridoxal-dependent decarboxylase pyridoxal binding domain, PF00278: Pyridoxal-dependent decarboxylase C-terminal sheet domain       | 1                  | 1                        | 0               | 0                           | 0                 | 0                  |
| AT3G14790 | RHM3__NAD-dependent epimerase/dehydratase family protein, similar to dTDP-glucose 4,6-dehydratase from Aneurinibacillus thermoaerophilus GI:16357461, Saccharopolyspora spinosa GI:15077647, RmlB from Leptospira borgpetersenii GI:4234803; contains Pfam profile PF01370 NAD dependent epimerase/dehydratase family | 0                  | 1                        | 0               | 0                           | 0                 | 0                  |
| AT3G15020 | malate dehydrogenase (NAD), mitochondrial, putative, similar to mitochondrial NAD-dependent malate dehydrogenase GB:CAA10320 SP:Q9ZP06 (Arabidopsis thaliana); contains InterPro entry IPR001236: Lactate/malate dehydrogenase                                                                                        | 1                  | 1                        | 1               | 1                           | 1                 | 1                  |



**Supplementary Tables pertaining to Figure 2**

**Supplementary Table S8. Proteins of the root cellular proteome that are in the AraCyc Plant Metabolic Network**

| Locus     | Annotation                                                                                                                                                                                                                                                                                                        | Root Hairs (COBL9) | Non-Hair Epidermis (WER) | Cortex (CORTEX) | Endodermis/ Quiescent (SCR) | Vasculature (WOL) | Columella (PET111) |
|-----------|-------------------------------------------------------------------------------------------------------------------------------------------------------------------------------------------------------------------------------------------------------------------------------------------------------------------|--------------------|--------------------------|-----------------|-----------------------------|-------------------|--------------------|
| AT3G15290 | 3-hydroxybutyryl-CoA dehydrogenase, putative, similar to S(+)-beta-hydroxybutyryl CoA dehydrogenase (3-hydroxybutyryl-CoA dehydrogenase) (Paracoccus denitrificans) GI:12003356; contains Pfam profiles PF02737: 3-hydroxyacyl-CoA dehydrogenase NAD binding, PF00725: 3-hydroxyacyl-CoA dehydrogenase C-terminal | 1                  | 0                        | 0               | 0                           | 0                 | 0                  |
| AT3G15640 | cytochrome c oxidase family protein, contains Pfam domain, PF01215: Cytochrome c oxidase subunit Vb                                                                                                                                                                                                               | 1                  | 0                        | 1               | 0                           | 1                 | 1                  |
| AT3G15730 | PLDALPHA1_PLD__phospholipase D alpha 1 / PLD alpha 1 (PLDALPHA1) (PLD1) / choline phosphatase 1, identical to SP:Q38882 Phospholipase D alpha 1 (EC 3.1.4.4) (AtPLDalpha1) (PLD alpha 1) (Choline phosphatase 1) (Phosphatidylcholine-hydrolyzing phospholipase D 1) (PLDalpha) (Arabidopsis thaliana)            | 1                  | 0                        | 1               | 1                           | 1                 | 1                  |
| AT3G16400 | ATMLP-470__jacalin lectin family protein, similar to myrosinase-binding protein homolog (Arabidopsis thaliana) GI:2997767, epithiospecifier (Arabidopsis thaliana) GI:16118845; contains Pfam profiles PF01419 jacalin-like lectin family, PF01344 Kelch motif                                                    | 0                  | 0                        | 0               | 0                           | 1                 | 0                  |
| AT3G16410 | jacalin lectin family protein, similar to myrosinase-binding protein homolog (Arabidopsis thaliana) GI:2997767, epithiospecifier (Arabidopsis thaliana) GI:16118845; contains Pfam profiles PF01419 jacalin-like lectin family, PF01344 Kelch motif                                                               | 1                  | 1                        | 0               | 0                           | 1                 | 1                  |

**Supplementary Tables pertaining to Figure 2**

**Supplementary Table S8. Proteins of the root cellular proteome that are in the AraCyc Plant Metabolic Network**

| Locus     | Annotation                                                                                                                                                                                                                                                                                                                                                                                                                              | Root Hairs<br>(COBL9) | Non-Hair<br>Epidermis<br>(WER) | Cortex<br>(CORTEX) | Endodermis/<br>Quiescent<br>(SCR) | Vasculature<br>(WOL) | Columella<br>(PET111) |
|-----------|-----------------------------------------------------------------------------------------------------------------------------------------------------------------------------------------------------------------------------------------------------------------------------------------------------------------------------------------------------------------------------------------------------------------------------------------|-----------------------|--------------------------------|--------------------|-----------------------------------|----------------------|-----------------------|
| AT3G17240 | LPD2__dihydrolipoamide dehydrogenase 2, mitochondrial / lipoamide dehydrogenase 2 (MTLPD2), nearly identical to GB:AAF34796 (gi:6984216) from ( <i>Arabidopsis thaliana</i> ); alternative splice form exists                                                                                                                                                                                                                           | 1                     | 1                              | 1                  | 1                                 | 1                    | 1                     |
| AT3G17390 | MTO3_SAMS3__S-adenosylmethionine synthetase, putative, similar to S-adenosylmethionine synthetase 2 (Methionine adenosyltransferase 2, AdoMet synthetase 2) ( <i>Catharanthus roseus</i> ) SWISS-PROT:Q96552                                                                                                                                                                                                                            | 1                     | 1                              | 1                  | 0                                 | 1                    | 1                     |
| AT3G17810 | dihydroorotate dehydrogenase family protein / dihydroorotate oxidase family protein, low similarity to SP:Q12882 Dihydropyrimidine dehydrogenase (NADP+) precursor (EC 1.3.1.2) (DPD) (DHPDHase) (Dihydrouracil dehydrogenase) (Dihydrothymine dehydrogenase) { <i>Homo sapiens</i> }; contains Pfam profile PF01180: Dihydroorotate dehydrogenase                                                                                      | 1                     | 1                              | 0                  | 1                                 | 0                    | 1                     |
| AT3G17820 | ATGSKB6__glutamine synthetase (GS1), identical to glutamine synthetase, cytosolic isozyme (glutamate-- ammonia ligase, GS1) ( <i>Arabidopsis thaliana</i> ) SWISS-PROT:Q9LVI8                                                                                                                                                                                                                                                           | 0                     | 0                              | 0                  | 1                                 | 0                    | 0                     |
| AT3G18000 | NMT1__phosphoethanolamine N-methyltransferase 1 / PEAMT 1 (NMT1), identical to Phosphoethanolamine N-methyltransferase 1 (EC 2.1.1.103) (PEAMT 1) ( <i>AtNMT1</i> ) (SP:Q9FR44){ <i>Arabidopsis thaliana</i> }; strong similarity to phosphoethanolamine N-methyltransferase from ( <i>Spinacia oleracea</i> ) GI:7407189, ( <i>Triticum aestivum</i> ) GI:17887465; contains Pfam profile PF01209: methyltransferase, UbiE/COQ5 family | 0                     | 0                              | 1                  | 0                                 | 0                    | 1                     |

**Supplementary Tables pertaining to Figure 2**

**Supplementary Table S8. Proteins of the root cellular proteome that are in the AraCyc Plant Metabolic Network**

| Locus     | Annotation                                                                                                                                                                                                                                                                                                                                                                                                                                                    | Root Hairs (COBL9) | Non-Hair Epidermis (WER) | Cortex (CORTEX) | Endodermis/ Quiescent (SCR) | Vasculature (WOL) | Columella (PET111) |
|-----------|---------------------------------------------------------------------------------------------------------------------------------------------------------------------------------------------------------------------------------------------------------------------------------------------------------------------------------------------------------------------------------------------------------------------------------------------------------------|--------------------|--------------------------|-----------------|-----------------------------|-------------------|--------------------|
| AT3G19450 | ATCAD4_CAD4_CAD-C_cinnamyl-alcohol dehydrogenase (CAD), identical to SP:P48523 Cinnamyl-alcohol dehydrogenase (EC 1.1.1.195) (CAD) (Arabidopsis thaliana)                                                                                                                                                                                                                                                                                                     | 0                  | 0                        | 0               | 1                           | 0                 | 0                  |
| AT3G20330 | aspartate carbamoyltransferase, chloroplast / aspartate transcarbamylase / ATCase (PYRB), identical to SP:P49077 Aspartate carbamoyltransferase, chloroplast precursor (EC 2.1.3.2) (Aspartate transcarbamylase) (ATCase) {Arabidopsis thaliana}                                                                                                                                                                                                              | 1                  | 0                        | 0               | 0                           | 1                 | 0                  |
| AT3G21110 | PUR7_PURC__phosphoribosylamidoimidazole-succinocarboxamide synthase / SAICAR synthetase (PUR7), identical to phosphoribosylamidoimidazole-succinocarboxamide synthase, chloroplast (precursor) SP:P38025 from (Arabidopsis thaliana)                                                                                                                                                                                                                          | 1                  | 1                        | 0               | 0                           | 0                 | 0                  |
| AT3G22200 | POP2_GABA-T__4-aminobutyrate aminotransferase / gamma-amino-N-butyrate transaminase / GABA transaminase / beta-alanine--oxoglutarate aminotransferase, identical to gamma-aminobutyrate transaminase subunit precursor (Arabidopsis thaliana) (EC 2.6.1.19) GI:14030435; contains Pfam profile PF00202: aminotransferase, class III; identical to cDNA gamma-aminobutyrate transaminase subunit precursor, nuclear gene for mitochondrial product GI:14030434 | 1                  | 1                        | 1               | 1                           | 1                 | 1                  |
| AT3G22370 | AOX1A__alternative oxidase 1a, mitochondrial (AOX1A), identical to GB:Q39219 (SP:Q39219) from (Arabidopsis thaliana)                                                                                                                                                                                                                                                                                                                                          | 1                  | 0                        | 1               | 0                           | 0                 | 0                  |
| AT3G22890 | APS1__sulfate adenylyltransferase 1 / ATP-sulfurylase 1 (APS1), nearly identical to ATP-sulfurylase (APS1) (Arabidopsis thaliana) GI:6606509                                                                                                                                                                                                                                                                                                                  | 0                  | 1                        | 1               | 1                           | 1                 | 1                  |

**Supplementary Tables pertaining to Figure 2**

**Supplementary Table S8. Proteins of the root cellular proteome that are in the AraCyc Plant Metabolic Network**

| Locus     | Annotation                                                                                                                                                                                                                                                                                                      | Root Hairs (COBL9) | Non-Hair Epidermis (WER) | Cortex (CORTEX) | Endodermis/ Quiescent (SCR) | Vasculature (WOL) | Columella (PET111) |
|-----------|-----------------------------------------------------------------------------------------------------------------------------------------------------------------------------------------------------------------------------------------------------------------------------------------------------------------|--------------------|--------------------------|-----------------|-----------------------------|-------------------|--------------------|
| AT3G22960 | pyruvate kinase, putative, similar to pyruvate kinase isozyme A, chloroplast precursor (Ricinus communis) SWISS-PROT:Q43117                                                                                                                                                                                     | 1                  | 1                        | 1               | 1                           | 1                 | 1                  |
| AT3G23820 | GAE6__NAD-dependent epimerase/dehydratase family protein, similar to nucleotide sugar epimerase from Vibrio vulnificus GI:3093975 (PID:g3093975), WbnF (Escherichia coli) GI:5739472, CAPI protein {Staphylococcus aureus} SP:P39858; contains Pfam profile: PF01370 NAD dependent epimerase/dehydratase family | 1                  | 1                        | 1               | 0                           | 1                 | 0                  |
| AT3G24170 | glutathione reductase, putative, identical to GB:P48641 from (Arabidopsis thaliana)                                                                                                                                                                                                                             | 1                  | 0                        | 1               | 1                           | 0                 | 0                  |
| AT3G24503 | ALDH2C4_ALDH1A_REF1__aldehyde dehydrogenase (ALDH1a), identical to aldehyde dehydrogenase ALDH1a (Arabidopsis thaliana) gi:20530143:gb:AAM27004                                                                                                                                                                 | 1                  | 0                        | 0               | 0                           | 0                 | 0                  |
| AT3G25110 | acyl-(acyl carrier protein) thioesterase / acyl-ACP thioesterase / oleoyl-(acyl-carrier protein) hydrolase / S-acyl fatty acid synthase thioesterase, identical to acyl-(acyl carrier protein) thioesterase (Arabidopsis thaliana) GI:804946                                                                    | 1                  | 1                        | 0               | 1                           | 1                 | 0                  |
| AT3G25140 | QUA1__glycosyl transferase family 8 protein, contains Pfam profile: PF01501 glycosyl transferase family 8                                                                                                                                                                                                       | 1                  | 0                        | 1               | 0                           | 1                 | 0                  |
| AT3G25585 | AAPT2__aminoalcoholphosphotransferase, putative, strong similarity to aminoalcoholphosphotransferase (Arabidopsis thaliana) GI:3661593; contains Pfam profile PF01066: CDP-alcohol phosphatidyltransferase                                                                                                      | 0                  | 0                        | 1               | 0                           | 0                 | 0                  |

**Supplementary Tables pertaining to Figure 2**

**Supplementary Table S8. Proteins of the root cellular proteome that are in the AraCyc Plant Metabolic Network**

| Locus     | Annotation                                                                                                                                                                                                                                                                                                                          | Root Hairs<br>(COBL9) | Non-Hair<br>Epidermis<br>(WER) | Cortex<br>(CORTEX) | Endodermis/<br>Quiescent<br>(SCR) | Vasculature<br>(WOL) | Columella<br>(PET111) |
|-----------|-------------------------------------------------------------------------------------------------------------------------------------------------------------------------------------------------------------------------------------------------------------------------------------------------------------------------------------|-----------------------|--------------------------------|--------------------|-----------------------------------|----------------------|-----------------------|
| AT3G25780 | AOC2__allene oxide cyclase, putative / early-responsive to dehydration protein, putative / ERD protein, putative, similar to allene oxide cyclase GI:8977961 from ( <i>Lycopersicon esculentum</i> ); similar to early-responsive to dehydration (ERD12) protein (GI:15320414); contains Pfam profile PF06351: Allene oxide cyclase | 1                     | 0                              | 1                  | 0                                 | 1                    | 1                     |
| AT3G25860 | LTA2_PLE2__dihydrolipoamide S-acetyltransferase (LTA2), identical to dihydrolipoamide S-acetyltransferase (LTA2) ( <i>Arabidopsis thaliana</i> ) GI:5881963                                                                                                                                                                         | 1                     | 1                              | 1                  | 1                                 | 1                    | 1                     |
| AT3G27300 | G6PD5__glucose-6-phosphate 1-dehydrogenase / G6PD (ACG9), identical to glucose-6-phosphate 1-dehydrogenase (acg9) ( <i>Arabidopsis thaliana</i> ) GI:5732195                                                                                                                                                                        | 1                     | 0                              | 0                  | 0                                 | 0                    | 0                     |
| AT3G27380 | SDH2-1__succinate dehydrogenase, iron-sulphur subunit, mitochondrial (SDH2-1), nearly identical to mitochondrial succinate dehydrogenase iron-sulphur subunit (sdh2-1) (gi:12049598) from <i>Arabidopsis thaliana</i>                                                                                                               | 1                     | 1                              | 1                  | 1                                 | 1                    | 1                     |
| AT3G27740 | CARA__carbamoyl-phosphate synthase (glutamine-hydrolyzing) (CARA) / glutamine-dependent carbamoyl-phosphate synthase small subunit, identical to carbamoyl phosphate synthetase small subunit GI:2462781 ( <i>Arabidopsis thaliana</i> )                                                                                            | 1                     | 1                              | 1                  | 1                                 | 1                    | 0                     |

**Supplementary Tables pertaining to Figure 2**

**Supplementary Table S8. Proteins of the root cellular proteome that are in the AraCyc Plant Metabolic Network**

| Locus     | Annotation                                                                                                                                                                                                                                                                                                                                                                                                                       | Root Hairs (COBL9) | Non-Hair Epidermis (WER) | Cortex (CORTEX) | Endodermis/ Quiescent (SCR) | Vasculature (WOL) | Columella (PET111) |
|-----------|----------------------------------------------------------------------------------------------------------------------------------------------------------------------------------------------------------------------------------------------------------------------------------------------------------------------------------------------------------------------------------------------------------------------------------|--------------------|--------------------------|-----------------|-----------------------------|-------------------|--------------------|
| AT3G29360 | UDP-glucose 6-dehydrogenase, putative, very strong similarity to SP:Q96558 UDP-glucose 6-dehydrogenase (EC 1.1.1.22) (UDP-Glc dehydrogenase) (UDP-GlcDH) (UDPGDH) {Glycine max}; contains Pfam profiles PF03721: UDP-glucose/GDP-mannose dehydrogenase family NAD binding domain, PF00984: UDP-glucose/GDP-mannose dehydrogenase family central domain, PF03720: UDP-glucose/GDP-mannose dehydrogenase family UDP binding domain | 1                  | 0                        | 0               | 0                           | 0                 | 0                  |
| AT3G44310 | ATNIT1_NIT1__The protein undergoes thiolation following treatment with the oxidant tert-butylhydroperoxide.                                                                                                                                                                                                                                                                                                                      | 0                  | 0                        | 1               | 0                           | 0                 | 0                  |
| AT3G44320 | NIT3__nitrilase 3 (NIT3), identical to SP:P46010 Nitrilase 3 (EC 3.5.5.1) {Arabidopsis thaliana}                                                                                                                                                                                                                                                                                                                                 | 0                  | 0                        | 1               | 1                           | 0                 | 0                  |
| AT3G44830 | lecithin:cholesterol acyltransferase family protein / LACT family protein, similar to lecithin:cholesterol acyltransferase (Rattus norvegicus) GI:2306762; contains Pfam profile PF02450: Lecithin:cholesterol acyltransferase (phosphatidylcholine-sterol acyltransferase)                                                                                                                                                      | 0                  | 0                        | 0               | 0                           | 0                 | 1                  |
| AT3G45300 | IVD_ATIVD__isovaleryl-CoA-dehydrogenase (IVD), identical to isovaleryl-CoA-dehydrogenase precursor (Arabidopsis thaliana) GI:5596622                                                                                                                                                                                                                                                                                             | 0                  | 0                        | 0               | 0                           | 0                 | 1                  |
| AT3G46940 | deoxyuridine 5'-triphosphate nucleotidohydrolase family, contains Pfam profile: PF00692 deoxyuridine 5'-triphosphate nucleotidohydrolase                                                                                                                                                                                                                                                                                         | 0                  | 0                        | 0               | 0                           | 1                 | 0                  |
| AT3G46970 | ATPHS2_PHS2__Encodes a cytosolic alpha-glucan phosphorylase.                                                                                                                                                                                                                                                                                                                                                                     | 1                  | 0                        | 0               | 0                           | 0                 | 1                  |

**Supplementary Tables pertaining to Figure 2**

**Supplementary Table S8. Proteins of the root cellular proteome that are in the AraCyc Plant Metabolic Network**

| Locus     | Annotation                                                                                                                                                                                                                                                                                                                                                         | Root Hairs (COBL9) | Non-Hair Epidermis (WER) | Cortex (CORTEX) | Endodermis/ Quiescent (SCR) | Vasculature (WOL) | Columella (PET111) |
|-----------|--------------------------------------------------------------------------------------------------------------------------------------------------------------------------------------------------------------------------------------------------------------------------------------------------------------------------------------------------------------------|--------------------|--------------------------|-----------------|-----------------------------|-------------------|--------------------|
| AT3G47520 | MDH__malate dehydrogenase (NAD), chloroplast (MDH), identical to chloroplast NAD-malate dehydrogenase (Arabidopsis thaliana) GI:3256066; contains InterPro entry IPR001236: Lactate/malate dehydrogenase; contains Pfam profiles PF00056: lactate/malate dehydrogenase, NAD binding domain and PF02866: lactate/malate dehydrogenase, alpha/beta C-terminal domain | 1                  | 1                        | 1               | 1                           | 1                 | 1                  |
| AT3G47930 | ATGLDH__L-galactono-1,4-lactone dehydrogenase, putative, strong similarity to L-galactono-1,4-lactone dehydrogenase, Brassica oleracea, Z97060 (gi:2760543), and gi:3986289 from Ipomea batatas                                                                                                                                                                    | 1                  | 1                        | 1               | 0                           | 1                 | 1                  |
| AT3G48000 | ALDH2B4_ALDH2__aldehyde dehydrogenase (ALDH2), identical to aldehyde dehydrogenase (Arabidopsis thaliana) GI:8574427; similar to mitochondrial aldehyde dehydrogenase (Arabidopsis thaliana) gi:19850249:gb:AAL99612; identical to cDNA aldehyde dehydrogenase AtALDH2a GI:20530140                                                                                | 1                  | 1                        | 1               | 1                           | 1                 | 1                  |
| AT3G48170 | ALDH10A9__betaine-aldehyde dehydrogenase, putative, similar to betaine-aldehyde dehydrogenase, chloroplast precursor (BADH) (Arabidopsis thaliana) SWISS-PROT:Q9S795                                                                                                                                                                                               | 1                  | 1                        | 0               | 0                           | 0                 | 1                  |
| AT3G48560 | CSR1_AHAS_ALS_IMR1_TZP5__acetolactate synthase, chloroplast / acetohydroxy-acid synthase (ALS), nearly identical to SP:P17597 Acetolactate synthase, chloroplast precursor (EC 2.2.1.6, formerly EC 4.1.3.18) (Acetohydroxy-acid synthase) (ALS) {Arabidopsis thaliana}                                                                                            | 1                  | 1                        | 0               | 0                           | 0                 | 0                  |

**Supplementary Tables pertaining to Figure 2**

**Supplementary Table S8. Proteins of the root cellular proteome that are in the AraCyc Plant Metabolic Network**

| Locus     | Annotation                                                                                                                                                                                                                                          | Root Hairs (COBL9) | Non-Hair Epidermis (WER) | Cortex (CORTEX) | Endodermis/ Quiescent (SCR) | Vasculature (WOL) | Columella (PET111) |
|-----------|-----------------------------------------------------------------------------------------------------------------------------------------------------------------------------------------------------------------------------------------------------|--------------------|--------------------------|-----------------|-----------------------------|-------------------|--------------------|
| AT3G48680 | bacterial transferase hexapeptide repeat-containing protein, contains Pfam profile PF00132: Bacterial transferase hexapeptide (four repeats); ferripyochelin binding protein - Methanobacterium thermoautotrophicum, EMBL:AE000918.1                | 1                  | 0                        | 1               | 0                           | 0                 | 1                  |
| AT3G48730 | glutamate-1-semialdehyde 2,1-aminomutase 2 (GSA 2) / glutamate-1-semialdehyde aminotransferase 2 (GSA-AT 2), identical to GSA2 (SP:Q42522)                                                                                                          | 1                  | 0                        | 1               | 0                           | 0                 | 0                  |
| AT3G49680 | branched-chain amino acid aminotransferase 3 / branched-chain amino acid transaminase 3 (BCAT3), identical to SP:Q9M401 Branched-chain amino acid aminotransferase 3, chloroplast precursor (EC 2.6.1.42) (Atbcat-3){ <i>Arabidopsis thaliana</i> } | 1                  | 1                        | 1               | 0                           | 1                 | 0                  |
| AT3G51160 | MUR1_GMD2_MUR_1__GDP-D-mannose-4,6-dehydratase (MUR1), almost identical to GDP-D-mannose-4,6-dehydratase (MUR1) GI:1764100 from ( <i>Arabidopsis thaliana</i> )                                                                                     | 1                  | 0                        | 0               | 0                           | 0                 | 1                  |
| AT3G51240 | F3H_TT6__naringenin 3-dioxygenase / flavanone 3-hydroxylase (F3H), identical to GI:3790548                                                                                                                                                          | 0                  | 0                        | 0               | 1                           | 0                 | 0                  |
| AT3G51840 | ACX4_ATG6_ATSCX__short-chain acyl-CoA oxidase, identical to Short-chain acyl CoA oxidase ( <i>Arabidopsis thaliana</i> ) GI:5478795; contains InterPro entry IPR006089: Acyl-CoA dehydrogenase                                                      | 1                  | 1                        | 1               | 0                           | 1                 | 1                  |
| AT3G52880 | ATMDAR1__monodehydroascorbate reductase, putative, monodehydroascorbate reductase (NADH), <i>Lycopersicon esculentum</i> , PIR:T06407                                                                                                               | 0                  | 0                        | 0               | 0                           | 1                 | 1                  |



**Supplementary Tables pertaining to Figure 2**

**Supplementary Table S8. Proteins of the root cellular proteome that are in the AraCyc Plant Metabolic Network**

| Locus     | Annotation                                                                                                                                                                                                                                                                                              | Root Hairs (COBL9) | Non-Hair Epidermis (WER) | Cortex (CORTEX) | Endodermis/ Quiescent (SCR) | Vasculature (WOL) | Columella (PET111) |
|-----------|---------------------------------------------------------------------------------------------------------------------------------------------------------------------------------------------------------------------------------------------------------------------------------------------------------|--------------------|--------------------------|-----------------|-----------------------------|-------------------|--------------------|
| AT3G52930 | fructose-bisphosphate aldolase, putative, similar to SP:O65735:ALF_CICAR Fructose-bisphosphate aldolase, cytoplasmic isozyme {Cicer arietinum}, cytosolic aldolase (Fragaria x ananassa) GI:10645188; contains Pfam profile PF00274 Fructose-bisphosphate aldolase class-I                              | 1                  | 1                        | 1               | 1                           | 1                 | 1                  |
| AT3G53520 | UXS1_ATUXS1__NAD-dependent epimerase/dehydratase family protein, similar to UDP-glucuronic acid decarboxylase Uxs1p from Filobasidiella neoformans GI:14318327; contains Pfam profile PF01370 NAD dependent epimerase/dehydratase family                                                                | 1                  | 1                        | 1               | 1                           | 1                 | 1                  |
| AT3G53580 | diaminopimelate epimerase family protein, contains Pfam profile PF01678: Diaminopimelate epimerase                                                                                                                                                                                                      | 1                  | 1                        | 0               | 0                           | 1                 | 1                  |
| AT3G53900 | uracil phosphoribosyltransferase, putative / UMP pyrophosphorylase, putative / UPRTase, putative, similar to SP:P50926 Uracil phosphoribosyltransferase (EC 2.4.2.9) (UMP pyrophosphorylase) (UPRTase) {Lactococcus lactis}; contains Pfam profile PF00156: Phosphoribosyl transferase domain           | 1                  | 0                        | 0               | 0                           | 0                 | 0                  |
| AT3G54470 | uridine 5'-monophosphate synthase / UMP synthase (PYRE-F) (UMPS), identical to SP:Q42586 Uridine 5'-monophosphate synthase (UMP synthase) (Includes: Orotate phosphoribosyltransferase (EC 2.4.2.10) (OPRtase); Orotidine 5'- phosphate decarboxylase (EC 4.1.1.23) (OMPdecase)) {Arabidopsis thaliana} | 0                  | 0                        | 0               | 0                           | 1                 | 0                  |
| AT3G54640 | TSA1_TRP3__tryptophan synthase, alpha subunit (TSA1), identical to gi:619753                                                                                                                                                                                                                            | 0                  | 1                        | 0               | 0                           | 0                 | 0                  |

**Supplementary Tables pertaining to Figure 2**

**Supplementary Table S8. Proteins of the root cellular proteome that are in the AraCyc Plant Metabolic Network**

| Locus     | Annotation                                                                                                                                                                                                                                                                                                                                                                                                                                                                                                                                                                                                                                                                                                | Root Hairs (COBL9) | Non-Hair Epidermis (WER) | Cortex (CORTEX) | Endodermis/ Quiescent (SCR) | Vasculature (WOL) | Columella (PET111) |
|-----------|-----------------------------------------------------------------------------------------------------------------------------------------------------------------------------------------------------------------------------------------------------------------------------------------------------------------------------------------------------------------------------------------------------------------------------------------------------------------------------------------------------------------------------------------------------------------------------------------------------------------------------------------------------------------------------------------------------------|--------------------|--------------------------|-----------------|-----------------------------|-------------------|--------------------|
| AT3G54660 | GR_EMB2360__glutathione reductase, chloroplast, nearly identical to SP:P42770<br>Glutathione reductase, chloroplast precursor (EC 1.8.1.7) (GR) (GRASE) {Arabidopsis thaliana}; identical to cDNA glutathione reductase GI:451197                                                                                                                                                                                                                                                                                                                                                                                                                                                                         | 1                  | 0                        | 1               | 0                           | 0                 | 0                  |
| AT3G55010 | phosphoribosylformylglycinamide cyclo-ligase, chloroplast / phosphoribosyl-aminoimidazole synthetase / AIR synthase (PUR5), identical to phosphoribosylformylglycinamide cyclo-ligase, chloroplast precursor SP:Q05728 from (Arabidopsis thaliana); contains Pfam profiles: PF02769 AIR synthase related protein, C-terminal domain, PF00586 AIR synthase related protein, N-terminal domain                                                                                                                                                                                                                                                                                                              | 1                  | 0                        | 0               | 1                           | 1                 | 1                  |
| AT3G55030 | phosphatidylglycerolphosphate synthase, putative, similar to phosphatidylglycerolphosphate synthase GI:13365519 from (Arabidopsis thaliana); contains non-consensus CG acceptor splice site at exon 4                                                                                                                                                                                                                                                                                                                                                                                                                                                                                                     | 1                  | 0                        | 0               | 0                           | 0                 | 1                  |
| AT3G55360 | CER10_ECR__Enoyl-CoA reductase (ECA) is involved in all very long chain fatty acids (VLCFA) elongation reactions that are required for cuticular wax, storage lipid and sphingolipid metabolism. The protein is located in the ER, but in contrast to its yeast homolog TSC13 is not particularly enriched in the nuclear envelope-vacuole junction. Mutants in this gene show abnormal organ morphology and stem glossiness. Cells in all tissues are only about 1/3 of the size of wild type cells. The morphological changes are most likely to result from the reduction in the VLCFA content of sphingolipids. Mutants also show abnormalities in the endocytic membrane organization and transport. | 1                  | 1                        | 1               | 1                           | 1                 | 0                  |

## Supplementary Tables pertaining to Figure 2

### Supplementary Table S8. Proteins of the root cellular proteome that are in the AraCyc Plant Metabolic Network

| Locus     | Annotation                                                                                                                                                                                                                                              | Root Hairs (COBL9) | Non-Hair Epidermis (WER) | Cortex (CORTEX) | Endodermis/ Quiescent (SCR) | Vasculature (WOL) | Columella (PET111) |
|-----------|---------------------------------------------------------------------------------------------------------------------------------------------------------------------------------------------------------------------------------------------------------|--------------------|--------------------------|-----------------|-----------------------------|-------------------|--------------------|
| AT3G55440 | ATCTIMC__triosephosphate isomerase, cytosolic, putative, strong similarity to triosephosphate isomerase, cytosolic from <i>Petunia hybrida</i> (SP:P48495), from <i>Coptis japonica</i> (SP:P21820)                                                     | 1                  | 1                        | 1               | 1                           | 1                 | 1                  |
| AT3G55610 | delta 1-pyrroline-5-carboxylate synthetase B / P5CS B (P5CS2), identical to SP:P54888                                                                                                                                                                   | 0                  | 0                        | 1               | 0                           | 0                 | 0                  |
| AT3G56310 | alpha-galactosidase, putative / melibiase, putative / alpha-D-galactoside galactohydrolase, putative, similar to alpha-galactosidase SP:Q42656 from ( <i>Coffea arabica</i> )                                                                           | 1                  | 0                        | 1               | 0                           | 0                 | 1                  |
| AT3G57050 | CBL__cystathionine beta-lyase, chloroplast / beta-cystathionase / cysteine lyase (CBL), identical to SP:P53780 Cystathionine beta-lyase, chloroplast precursor (EC 4.4.1.8) (CBL) (Beta-cystathionase) (Cysteine lyase) { <i>Arabidopsis thaliana</i> } | 1                  | 0                        | 1               | 0                           | 1                 | 1                  |
| AT3G57560 | aspartate/glutamate/uridylylate kinase family protein, similar to acetylglutamate kinase from <i>Porphyra purpurea</i> (SP:P31595), <i>Campylobacter jejuni</i> (GI:6650364) contains Pfam profile PF00696: Amino acid kinase family                    | 1                  | 0                        | 0               | 0                           | 0                 | 0                  |
| AT3G57610 | adenylosuccinate synthetase (ADSS), identical to adenylosuccinate synthetase, chloroplast precursor (EC 6.3.4.4) (IMP-- aspartate ligase) (AdSS) (AMPSase) (Swiss-Prot:Q96529) ( <i>Arabidopsis thaliana</i> )                                          | 1                  | 1                        | 1               | 1                           | 1                 | 1                  |
| AT3G57650 | LPAT2__acyl-CoA:1-acylglycerol-3-phosphate acyltransferase, putative, similar to acyl-CoA:1-acylglycerol-3-phosphate acyltransferase GI:4583544 from ( <i>Brassica napus</i> )                                                                          | 1                  | 0                        | 0               | 1                           | 1                 | 1                  |
| AT3G58140 | phenylalanyl-tRNA synthetase class IIc family protein, similar to phenylalanine-tRNA synthetase ( <i>Homo sapiens</i> ) GI:3983103; contains Pfam profile PF01409: tRNA synthetases class II core domain (F)                                            | 1                  | 0                        | 0               | 0                           | 0                 | 0                  |

**Supplementary Tables pertaining to Figure 2**

**Supplementary Table S8. Proteins of the root cellular proteome that are in the AraCyc Plant Metabolic Network**

| Locus     | Annotation                                                                                                                                                                                                                                                                                                    | Root Hairs (COBL9) | Non-Hair Epidermis (WER) | Cortex (CORTEX) | Endodermis/ Quiescent (SCR) | Vasculature (WOL) | Columella (PET111) |
|-----------|---------------------------------------------------------------------------------------------------------------------------------------------------------------------------------------------------------------------------------------------------------------------------------------------------------------|--------------------|--------------------------|-----------------|-----------------------------|-------------------|--------------------|
| AT3G58750 | CSY2__citrate synthase, glyoxysomal, putative, strong similarity to SP:P49299 Citrate synthase, glyoxysomal precursor {Cucurbita maxima}; contains Pfam profile PF00285: Citrate synthase                                                                                                                     | 1                  | 1                        | 0               | 0                           | 1                 | 1                  |
| AT3G59760 | OASC_ATCS-C__cysteine synthase, mitochondrial, putative / O-acetylserine (thiol)-lyase, putative / O-acetylserine sulfhydrylase, putative, similar to SP:Q43725 Cysteine synthase, mitochondrial precursor (EC 4.2.99.8) (O-acetylserine sulfhydrylase) (O-acetylserine (Thiol)-lyase) {Arabidopsis thaliana} | 1                  | 1                        | 1               | 1                           | 1                 | 1                  |
| AT3G59890 | dihydrodipicolinate reductase family protein, weak similarity to SP:Q52419 Dihydrodipicolinate reductase (EC 1.3.1.26) (DHPR) {Pseudomonas syringae}; contains Pfam profiles PF01113: Dihydrodipicolinate reductase N-terminus, PF05173: Dihydrodipicolinate reductase C-terminus                             | 0                  | 0                        | 0               | 0                           | 1                 | 0                  |
| AT3G59970 | MTHFR1__methylenetetrahydrofolate reductase 1 (MTHFR1), identical to methylenetetrahydrofolate reductase MTHFR1 (Arabidopsis thaliana) GI:5911425                                                                                                                                                             | 1                  | 0                        | 0               | 1                           | 0                 | 0                  |
| AT3G60100 | CSY5__citrate synthase, mitochondrial, putative, strong similarity to SP:Q43175 Citrate synthase, mitochondrial precursor {Solanum tuberosum}; contains Pfam profile PF00285: Citrate synthase                                                                                                                | 0                  | 0                        | 1               | 0                           | 0                 | 0                  |
| AT3G60750 | transketolase, putative, strong similarity to transketolase 1 (Capsicum annuum) GI:3559814; contains Pfam profiles PF02779: Transketolase, pyridine binding domain, PF02780: Transketolase, C-terminal domain, PF00456: Transketolase, thiamine diphosphate binding domain                                    | 1                  | 1                        | 1               | 1                           | 1                 | 1                  |
| AT3G61130 | glycosyl transferase family 8 protein, contains Pfam profile: PF01501 glycosyl transferase family 8                                                                                                                                                                                                           | 1                  | 0                        | 1               | 0                           | 0                 | 1                  |

**Supplementary Tables pertaining to Figure 2**

**Supplementary Table S8. Proteins of the root cellular proteome that are in the AraCyc Plant Metabolic Network**

| Locus     | Annotation                                                                                                                                                                                                                                                                                                                                        | Root Hairs (COBL9) | Non-Hair Epidermis (WER) | Cortex (CORTEX) | Endodermis/Quiescent (SCR) | Vasculature (WOL) | Columella (PET111) |
|-----------|---------------------------------------------------------------------------------------------------------------------------------------------------------------------------------------------------------------------------------------------------------------------------------------------------------------------------------------------------|--------------------|--------------------------|-----------------|----------------------------|-------------------|--------------------|
| AT3G61440 | ARATH;BSAS3;1_ATCYSC1__encodes a cysteine synthase isomer. The isomer is however less effective in cysteine biosynthesis. It is involved in beta-cyanoalanine biosynthesis, a intermediate of cyanide detoxification pathway.                                                                                                                     | 1                  | 0                        | 1               | 1                          | 1                 | 1                  |
| AT3G61580 | delta-8 sphingolipid desaturase (SLD1), identical to delta-8 sphingolipid desaturase Gl:3819710 from ( <i>Arabidopsis thaliana</i> ); contains Pfam profile PF00487: Fatty acid desaturase; contains Pfam profile PF00173: Heme/Steroid binding domain                                                                                            | 0                  | 0                        | 0               | 0                          | 1                 | 0                  |
| AT3G62830 | AUD1_UXS2_ATUXS2__NAD-dependent epimerase/dehydratase family protein, similar to UDP-glucuronic acid decarboxylase Uxs1p from <i>Filobasidiella neoformans</i> Gl:14318327; contains Pfam profile PF01370 NAD dependent epimerase/dehydratase family; contains non-consensus CA donor splice site at exon 1 and TA acceptor splice site at exon 2 | 1                  | 1                        | 1               | 1                          | 1                 | 1                  |
| AT3G63410 | APG1_VTE3__chloroplast inner envelope membrane protein, putative (APG1), similar to SP:P23525 37 kDa inner envelope membrane protein, chloroplast precursor (E37) ( <i>Spinacia oleracea</i> ); contains Pfam profile PF01209: methyltransferase, UbiE/COQ5 family                                                                                | 0                  | 1                        | 1               | 1                          | 1                 | 1                  |
| AT4G00490 | beta-amylase, putative / 1,4-alpha-D-glucan maltohydrolase, putative, similar to beta-amylase from SP:O64407 ( <i>Vigna unguiculata</i> ); contains Pfam profile PF01373: Glycosyl hydrolase family                                                                                                                                               | 1                  | 1                        | 0               | 0                          | 0                 | 1                  |

**Supplementary Tables pertaining to Figure 2**

**Supplementary Table S8. Proteins of the root cellular proteome that are in the AraCyc Plant Metabolic Network**

| Locus     | Annotation                                                                                                                                                                                                                                                                                                                                                                                                                                                                                                                             | Root Hairs (COBL9) | Non-Hair Epidermis (WER) | Cortex (CORTEX) | Endodermis/ Quiescent (SCR) | Vasculature (WOL) | Columella (PET111) |
|-----------|----------------------------------------------------------------------------------------------------------------------------------------------------------------------------------------------------------------------------------------------------------------------------------------------------------------------------------------------------------------------------------------------------------------------------------------------------------------------------------------------------------------------------------------|--------------------|--------------------------|-----------------|-----------------------------|-------------------|--------------------|
| AT4G00620 | tetrahydrofolate dehydrogenase/cyclohydrolase, putative, similar to SP:P07245 C-1-tetrahydrofolate synthase, cytoplasmic (C1-THF synthase) (Includes: Methylene tetrahydrofolate dehydrogenase (EC 1.5.1.5); Methenyltetrahydrofolate cyclohydrolase (EC 3.5.4.9); Formyltetrahydrofolate synthetase (EC 6.3.4.3)) { <i>Saccharomyces cerevisiae</i> }; contains Pfam profiles PF02882: Tetrahydrofolate dehydrogenase/cyclohydrolase, NAD(P)-binding domain, PF00763: Tetrahydrofolate dehydrogenase/cyclohydrolase, catalytic domain | 1                  | 1                        | 0               | 0                           | 0                 | 0                  |
| AT4G01690 | PPOX__protoporphyrinogen oxidase (PPOX), identical to SP:P55826                                                                                                                                                                                                                                                                                                                                                                                                                                                                        | 0                  | 1                        | 0               | 0                           | 0                 | 1                  |
| AT4G01850 | S-adenosylmethionine synthetase 2 (SAM2), identical to S-adenosylmethionine synthetase 2 (Methionine adenosyltransferase 2, AdoMet synthetase 2) ( <i>Arabidopsis thaliana</i> ) SWISS-PROT:P17562                                                                                                                                                                                                                                                                                                                                     | 1                  | 1                        | 1               | 0                           | 1                 | 0                  |
| AT4G02580 | NADH-ubiquinone oxidoreductase 24 kDa subunit, putative, similar to NADH-ubiquinone oxidoreductase 24 kDa subunit, mitochondrial precursor (EC 1.6.5.3) (EC 1.6.99.3) (Polypeptide II) (Swiss-Prot:P04394) ( <i>Bos taurus</i> )                                                                                                                                                                                                                                                                                                       | 1                  | 1                        | 1               | 1                           | 1                 | 1                  |
| AT4G08790 | nitrilase, putative, similar to nitrilase 1 ( <i>Mus musculus</i> ) GI:3228668; contains Pfam profile PF00795: hydrolase, carbon-nitrogen family                                                                                                                                                                                                                                                                                                                                                                                       | 0                  | 0                        | 0               | 0                           | 1                 | 0                  |
| AT4G09320 | NDPK1__nucleoside diphosphate kinase 1 (NDK1), identical to identical to Nucleoside diphosphate kinase I (NDK I) (NDP kinase I) (NDPK I) (SP:P39207) ( <i>Arabidopsis thaliana</i> ); contains Pfam PF00334 : Nucleoside diphosphate kinase domain;                                                                                                                                                                                                                                                                                    | 1                  | 1                        | 1               | 1                           | 1                 | 1                  |

**Supplementary Tables pertaining to Figure 2**

**Supplementary Table S8. Proteins of the root cellular proteome that are in the AraCyc Plant Metabolic Network**

| Locus     | Annotation                                                                                                                                                                                                                                                                                     | Root Hairs (COBL9) | Non-Hair Epidermis (WER) | Cortex (CORTEX) | Endodermis/ Quiescent (SCR) | Vasculature (WOL) | Columella (PET111) |
|-----------|------------------------------------------------------------------------------------------------------------------------------------------------------------------------------------------------------------------------------------------------------------------------------------------------|--------------------|--------------------------|-----------------|-----------------------------|-------------------|--------------------|
| AT4G10260 | pfkB-type carbohydrate kinase family protein, contains Pfam profile: PF00294 pfkB family carbohydrate kinase                                                                                                                                                                                   | 0                  | 0                        | 0               | 0                           | 1                 | 0                  |
| AT4G10320 | isoleucyl-tRNA synthetase, putative / isoleucine--tRNA ligase, putative, similar to SP:P41252 Isoleucyl-tRNA synthetase, cytoplasmic (EC 6.1.1.5) (Isoleucine--tRNA ligase) (IleRS) (IRS) {Homo sapiens}; contains Pfam profile PF00133: tRNA synthetases class I (I, L, M and V)              | 1                  | 0                        | 0               | 1                           | 1                 | 0                  |
| AT4G11010 | NDPK3__nucleoside diphosphate kinase 3, mitochondrial (NDK3), identical to Nucleoside diphosphate kinase III, mitochondrial precursor (NDK III) (NDP kinase III) (NDPK III) (SP:O49203) (Arabidopsis thaliana); contains Pfam PF00334 : Nucleoside diphosphate kinase domain;                  | 1                  | 1                        | 1               | 1                           | 1                 | 1                  |
| AT4G11600 | ATGPX6_LSC803_PHGPX__glutathione peroxidase, putative                                                                                                                                                                                                                                          | 1                  | 0                        | 0               | 0                           | 0                 | 0                  |
| AT4G11820 | BAP1_MVA1__hydroxymethylglutaryl-CoA synthase / HMG-CoA synthase / 3-hydroxy-3-methylglutaryl coenzyme A synthase, identical to Hydroxymethylglutaryl-CoA synthase (EC 4.1.3.5) (HMG-CoA synthase) (3-hydroxy-3-methylglutaryl coenzyme A synthase) (Swiss-Prot:P54873) (Arabidopsis thaliana) | 1                  | 0                        | 0               | 1                           | 1                 | 0                  |
| AT4G11850 | phospholipase D gamma 1 / PLD gamma 1 (PLDGAMMA1), identical to phospholipase D gamma 1 SP:Q9T053 from (Arabidopsis thaliana)                                                                                                                                                                  | 0                  | 0                        | 0               | 0                           | 1                 | 0                  |
| AT4G13430 | aconitase family protein / aconitate hydratase family protein, contains Pfam profile PF00330: Aconitase family (aconitate hydratase                                                                                                                                                            | 1                  | 1                        | 1               | 1                           | 1                 | 1                  |

**Supplementary Tables pertaining to Figure 2**

**Supplementary Table S8. Proteins of the root cellular proteome that are in the AraCyc Plant Metabolic Network**

| Locus     | Annotation                                                                                                                                                                                                                                                                                                                                             | Root Hairs (COBL9) | Non-Hair Epidermis (WER) | Cortex (CORTEX) | Endodermis/ Quiescent (SCR) | Vasculature (WOL) | Columella (PET111) |
|-----------|--------------------------------------------------------------------------------------------------------------------------------------------------------------------------------------------------------------------------------------------------------------------------------------------------------------------------------------------------------|--------------------|--------------------------|-----------------|-----------------------------|-------------------|--------------------|
| AT4G13780 | methionine--tRNA ligase, putative / methionyl-tRNA synthetase, putative / MetRS, putative, similar to methionyl-tRNA synthetase ( <i>Oryza sativa</i> ) GI:4091008; contains Pfam profiles PF00133: tRNA synthetases class I (I, L, M and V), PF01588: Putative tRNA binding domain                                                                    | 0                  | 0                        | 0               | 1                           | 1                 | 0                  |
| AT4G13930 | SHM4__glycine hydroxymethyltransferase, putative / serine hydroxymethyltransferase, putative / serine/threonine aldolase, putative, similar to serine hydroxymethyltransferase ( <i>Chlamydomonas reinhardtii</i> ) GI:17066746; contains Pfam profile PF00464: serine hydroxymethyltransferase                                                        | 1                  | 1                        | 1               | 1                           | 1                 | 1                  |
| AT4G13940 | EMB1395_HOG1_SAHH_SAHH1__adenosylhomocysteinase / S-adenosyl-L-homocysteine hydrolase / AdoHcyase (SAHH), identical to SP:O23255 Adenosylhomocysteinase (EC 3.3.1.1) (S-adenosyl-L-homocysteine hydrolase) (AdoHcyase) { <i>Arabidopsis thaliana</i> }; strong similarity to SP:P50248 Adenosylhomocysteinase (EC 3.3.1.1) { <i>Nicotiana glauca</i> } | 1                  | 1                        | 1               | 1                           | 1                 | 1                  |
| AT4G14430 | enoyl-CoA hydratase/isomerase family protein, low similarity to 2-cyclohexenylcarbonyl CoA isomerase ( <i>Streptomyces collinus</i> ) GI:8133118, enoyl-CoA isomerase ( <i>Escherichia coli</i> ) GI:2764829; contains Pfam profile PF00378 enoyl-CoA hydratase/isomerase family protein                                                               | 0                  | 0                        | 0               | 0                           | 0                 | 1                  |
| AT4G14680 | APS3__sulfate adenylyltransferase 3 / ATP-sulfurylase 3 (APS3), identical to ATP sulfurylase (APS3) ( <i>Arabidopsis thaliana</i> ) GI:1575327                                                                                                                                                                                                         | 0                  | 0                        | 0               | 0                           | 1                 | 0                  |



**Supplementary Tables pertaining to Figure 2**

**Supplementary Table S8. Proteins of the root cellular proteome that are in the AraCyc Plant Metabolic Network**

| Locus     | Annotation                                                                                                                                                                                                                                                                                                                | Root Hairs (COBL9) | Non-Hair Epidermis (WER) | Cortex (CORTEX) | Endodermis/ Quiescent (SCR) | Vasculature (WOL) | Columella (PET111) |
|-----------|---------------------------------------------------------------------------------------------------------------------------------------------------------------------------------------------------------------------------------------------------------------------------------------------------------------------------|--------------------|--------------------------|-----------------|-----------------------------|-------------------|--------------------|
| AT4G14880 | OASA1_CYTACS1__cysteine synthase / O-acetylserine (thiol)-lyase / O-acetylserine sulfhydrylase (OAS1), nearly identical to SP:P47998 Cysteine synthase (EC 4.2.99.8) (O-acetylserine sulfhydrylase) (O-acetylserine (Thiol)-lyase) {Arabidopsis thaliana}; identical to cDNA O-acetylserine lyase (At.OAS.5-8) GI:6983573 | 1                  | 1                        | 1               | 0                           | 1                 | 1                  |
| AT4G16210 | enoyl-CoA hydratase/isomerase family protein, similar to 3-hydroxybutyryl-CoA dehydratase (Crotonase) from Clostridium acetobutylicum (SP:P52046), FadB1x (enoyl-CoA hydratase) from Pseudomonas putida (GI:13310130); contains Pfam profile PF00378 enoyl-CoA hydratase/isomerase family protein                         | 1                  | 0                        | 0               | 0                           | 0                 | 0                  |
| AT4G16450 | expressed protein                                                                                                                                                                                                                                                                                                         | 1                  | 0                        | 1               | 1                           | 1                 | 1                  |
| AT4G16760 | ACX1_ATACX1__acyl-CoA oxidase (ACX1), identical to acyl-CoA oxidase (Arabidopsis thaliana) GI:3044214                                                                                                                                                                                                                     | 1                  | 1                        | 1               | 1                           | 1                 | 0                  |
| AT4G18360 | (S)-2-hydroxy-acid oxidase, peroxisomal, putative / glycolate oxidase, putative / short chain alpha-hydroxy acid oxidase, putative, similar to (S)-2-hydroxy-acid oxidase, peroxisomal (Glycolate oxidase, GOX) (Short chain alpha-hydroxy acid oxidase) (Spinacia oleracea) SWISS-PROT:P05414                            | 0                  | 0                        | 1               | 0                           | 0                 | 0                  |
| AT4G18440 | adenylosuccinate lyase, putative / adenylosuccinase, putative, similar to SP:P25739 Adenylosuccinate lyase (EC 4.3.2.2) (Adenylosuccinase) {Escherichia coli}; contains Pfam profile PF00206: Lyase                                                                                                                       | 1                  | 0                        | 0               | 0                           | 1                 | 0                  |
| AT4G19710 | AK-HSDH_AK-HSDH II__bifunctional aspartate kinase/homoserine dehydrogenase, putative / AK-HSDH, putative, similar to gb:X71364 (PIR:S46497) aspartate kinase / homoserine dehydrogenase from Arabidopsis thaliana                                                                                                         | 1                  | 1                        | 0               | 0                           | 0                 | 0                  |

**Supplementary Tables pertaining to Figure 2**

**Supplementary Table S8. Proteins of the root cellular proteome that are in the AraCyc Plant Metabolic Network**

| Locus     | Annotation                                                                                                                                                                                                                                                                                                                                                                                                                                                                             | Root Hairs (COBL9) | Non-Hair Epidermis (WER) | Cortex (CORTEX) | Endodermis/ Quiescent (SCR) | Vasculature (WOL) | Columella (PET111) |
|-----------|----------------------------------------------------------------------------------------------------------------------------------------------------------------------------------------------------------------------------------------------------------------------------------------------------------------------------------------------------------------------------------------------------------------------------------------------------------------------------------------|--------------------|--------------------------|-----------------|-----------------------------|-------------------|--------------------|
| AT4G20460 | NAD-dependent epimerase/dehydratase family protein, similar to UDP-galactose 4-epimerase from <i>Cyamopsis tetragonoloba</i> GI:3021357 (EMBL:AJ005082), <i>Bacillus subtilis</i> SP:P55180; contains Pfam profile PF01370 NAD dependent epimerase/dehydratase family                                                                                                                                                                                                                  | 1                  | 0                        | 0               | 0                           | 0                 | 0                  |
| AT4G21540 | Encodes a putative sphingosine kinase (SphK) containing the five conserved domains (C1-C5) previously identified in SphKs.                                                                                                                                                                                                                                                                                                                                                             | 1                  | 0                        | 0               | 0                           | 0                 | 0                  |
| AT4G22930 | PYR4_dihydroorotase, mitochondrial / DHOase (PYR4), identical to SP:O04904 Dihydroorotase, mitochondrial precursor (EC 3.5.2.3) (DHOase) { <i>Arabidopsis thaliana</i> }                                                                                                                                                                                                                                                                                                               | 1                  | 1                        | 1               | 1                           | 1                 | 0                  |
| AT4G23100 | GSH1_RML1_CAD2_GSH1__glutamate-cysteine ligase / gamma-glutamylcysteine synthetase (GSH1), identical to glutamate-cysteine ligase SP:P46309 from ( <i>Arabidopsis thaliana</i> ); contains Pfam profile: PF04107 glutamate-cysteine ligase family 2(GCS2). Two mRNA species are detected for this locus which differ in the length of their 5' UTRs. The ratio of the two species appears to be developmentally regulated. Both encode a protein that is localized to the chloroplast. | 1                  | 0                        | 1               | 1                           | 1                 | 0                  |
| AT4G23590 | aminotransferase class I and II family protein, similar to nicotianamine aminotransferase from <i>Hordeum vulgare</i> (GI:6498122, GI:6469087); contains Pfam profile PF00155 aminotransferase, classes I and II                                                                                                                                                                                                                                                                       | 1                  | 1                        | 0               | 0                           | 0                 | 1                  |
| AT4G23850 | long-chain-fatty-acid--CoA ligase / long-chain acyl-CoA synthetase, nearly identical to acyl-CoA synthetase (MF7P) from <i>Brassica napus</i> (gi:1617270)                                                                                                                                                                                                                                                                                                                             | 0                  | 0                        | 0               | 0                           | 0                 | 1                  |

**Supplementary Tables pertaining to Figure 2**

**Supplementary Table S8. Proteins of the root cellular proteome that are in the AraCyc Plant Metabolic Network**

| Locus     | Annotation                                                                                                                                                                                                                                                                                                                | Root Hairs (COBL9) | Non-Hair Epidermis (WER) | Cortex (CORTEX) | Endodermis/ Quiescent (SCR) | Vasculature (WOL) | Columella (PET111) |
|-----------|---------------------------------------------------------------------------------------------------------------------------------------------------------------------------------------------------------------------------------------------------------------------------------------------------------------------------|--------------------|--------------------------|-----------------|-----------------------------|-------------------|--------------------|
| AT4G23900 | nucleoside diphosphate kinase 4 (NDK4), contains Pfam PF00334 : Nucleoside diphosphate kinase domain; identical to nucleoside diphosphate kinase 4 (GI:11990430) ( <i>Arabidopsis thaliana</i> )                                                                                                                          | 0                  | 0                        | 0               | 1                           | 0                 | 0                  |
| AT4G23920 | UDP-glucose 4-epimerase, putative / UDP-galactose 4-epimerase, putative / Galactowaldenase, putative, similar to UDP-galactose 4-epimerase from <i>Arabidopsis thaliana</i> SP:Q42605, <i>Cyamopsis tetragonoloba</i> GI:3021357 (AJ005082)                                                                               | 0                  | 0                        | 0               | 0                           | 0                 | 1                  |
| AT4G24620 | PGI1_PGI__glucose-6-phosphate isomerase, putative, similar to glucose-6-phosphate isomerase ( <i>Spinacia oleracea</i> ) GI:3413511; contains Pfam profile PF00342: glucose-6-phosphate isomerase                                                                                                                         | 1                  | 1                        | 1               | 1                           | 1                 | 1                  |
| AT4G25570 | ACYB-2__cytochrome B561 family protein, contains Pfam domain, PF03188: Cytochrome b561                                                                                                                                                                                                                                    | 1                  | 0                        | 0               | 0                           | 0                 | 0                  |
| AT4G26300 | EMB1027__arginyl-tRNA synthetase, putative / arginine--tRNA ligase, putative, similar to SP:P37880 Arginyl-tRNA synthetase (EC 6.1.1.19) (Arginine--tRNA ligase) (ArgRS) { <i>Cricetulus longicaudatus</i> }; contains Pfam profiles PF00750: arginyl-tRNA synthetase, PF03485: arginyl-tRNA synthetase N-terminal domain | 1                  | 0                        | 0               | 1                           | 1                 | 0                  |
| AT4G26900 | AT-HF_HISHF__imidazole glycerol phosphate synthase hisHF, chloroplast / IGP synthase / ImGPP synthase / IGPS, identical to SP:Q9SZ30 Imidazole glycerol phosphate synthase hisHF, chloroplast precursor (IGP synthase) { <i>Arabidopsis thaliana</i> }                                                                    | 1                  | 1                        | 1               | 1                           | 1                 | 0                  |

**Supplementary Tables pertaining to Figure 2**

**Supplementary Table S8. Proteins of the root cellular proteome that are in the AraCyc Plant Metabolic Network**

| Locus     | Annotation                                                                                                                                                                                                                                                                                                                                | Root Hairs (COBL9) | Non-Hair Epidermis (WER) | Cortex (CORTEX) | Endodermis/ Quiescent (SCR) | Vasculature (WOL) | Columella (PET111) |
|-----------|-------------------------------------------------------------------------------------------------------------------------------------------------------------------------------------------------------------------------------------------------------------------------------------------------------------------------------------------|--------------------|--------------------------|-----------------|-----------------------------|-------------------|--------------------|
| AT4G26910 | 2-oxoacid dehydrogenase family protein, similar to SP:P36957 Dihydrolipoamide succinyltransferase component of 2-oxoglutarate dehydrogenase complex, mitochondrial precursor (EC 2.3.1.61) {Homo sapiens}; contains Pfam profiles PF00198: 2-oxo acid dehydrogenases acyltransferase (catalytic domain), PF00364: Biotin-requiring enzyme | 1                  | 1                        | 1               | 0                           | 1                 | 1                  |
| AT4G26970 | aconitate hydratase, cytoplasmic, putative / citrate hydro-lyase/aconitase, putative, strong similarity to SP:P49608 Aconitate hydratase, cytoplasmic (EC 4.2.1.3) (Citrate hydro-lyase) (Aconitase) {Cucurbita maxima}; contains Pfam profiles PF00330: Aconitase family (aconitate hydratase), PF00694: Aconitase C-terminal domain     | 1                  | 1                        | 0               | 0                           | 1                 | 1                  |
| AT4G29010 | AIM1__abnormal inflorescence meristem 1 / fatty acid multifunctional protein (AIM1), identical to gi:4337025; contains Pfam profiles PF02737 (3-hydroxyacyl-CoA dehydrogenase, NAD binding domain), PF00378 (enoyl-CoA hydratase/isomerase family protein), PF00725 (3-hydroxyacyl-CoA dehydrogenase)                                     | 1                  | 1                        | 1               | 0                           | 1                 | 1                  |
| AT4G29130 | ATHXK1_GIN2_HXK1__hexokinase 1 (HXK1), identical to hexokinase 1 (Arabidopsis thaliana) Swiss-Prot:Q42525                                                                                                                                                                                                                                 | 1                  | 1                        | 1               | 1                           | 1                 | 1                  |
| AT4G29840 | MTO2_TS__threonine synthase, chloroplast, identical to SP:Q9S7B5 Threonine synthase, chloroplast precursor (EC 4.2.3.1) (TS) {Arabidopsis thaliana}                                                                                                                                                                                       | 1                  | 1                        | 1               | 1                           | 1                 | 1                  |

**Supplementary Tables pertaining to Figure 2**

**Supplementary Table S8. Proteins of the root cellular proteome that are in the AraCyc Plant Metabolic Network**

| Locus     | Annotation                                                                                                                                                                                                                                                                                                                              | Root Hairs (COBL9) | Non-Hair Epidermis (WER) | Cortex (CORTEX) | Endodermis/ Quiescent (SCR) | Vasculature (WOL) | Columella (PET111) |
|-----------|-----------------------------------------------------------------------------------------------------------------------------------------------------------------------------------------------------------------------------------------------------------------------------------------------------------------------------------------|--------------------|--------------------------|-----------------|-----------------------------|-------------------|--------------------|
| AT4G30440 | GAE1__NAD-dependent epimerase/dehydratase family protein, similar to nucleotide sugar epimerase from <i>Vibrio vulnificus</i> GI:3093975 (PID:g3093975), WbnF ( <i>Escherichia coli</i> ) GI:5739472, CAPI protein { <i>Staphylococcus aureus</i> } SP:P39858; contains Pfam profile PF01370 NAD dependent epimerase/dehydratase family | 0                  | 0                        | 1               | 0                           | 1                 | 0                  |
| AT4G31180 | aspartyl-tRNA synthetase, putative / aspartate--tRNA ligase, putative, similar to Aspartyl-tRNA synthetase (Aspartate--tRNA ligase) (AsPRS) ( <i>Homo sapiens</i> ) GI:20178330                                                                                                                                                         | 0                  | 0                        | 0               | 1                           | 0                 | 0                  |
| AT4G31500 | CYP83B1_ATR4_RED1_RNT1_SUR2__cytochrome P450 83B1 (CYP83B1), Identical to Cytochrome P450 (SP:O65782 )( <i>Arabidopsis thaliana</i> )                                                                                                                                                                                                   | 0                  | 1                        | 0               | 0                           | 1                 | 1                  |
| AT4G31810 | enoyl-CoA hydratase/isomerase family protein, similar to CHY1 (gi:8572760); contains Pfam profile PF00388 enoyl-CoA hydratase/isomerase family protein                                                                                                                                                                                  | 1                  | 1                        | 1               | 0                           | 1                 | 1                  |
| AT4G31990 | ASP5_AAT3_ATAAT1__aspartate aminotransferase, chloroplast / transaminase A (ASP5) (AAT1), nearly identical to SP:P46248 Aspartate aminotransferase, chloroplast precursor (EC 2.6.1.1) (Transaminase A) { <i>Arabidopsis thaliana</i> }                                                                                                 | 1                  | 1                        | 1               | 1                           | 1                 | 1                  |
| AT4G32410 | CESA1_RSW1_CESA9_CESA09__cellulose synthase, catalytic subunit, putative, similar to cellulose synthase-1 (gi:9622874) and -2 (gi:9622876) from <i>Zea mays</i>                                                                                                                                                                         | 1                  | 1                        | 1               | 1                           | 1                 | 0                  |

**Supplementary Tables pertaining to Figure 2**

**Supplementary Table S8. Proteins of the root cellular proteome that are in the AraCyc Plant Metabolic Network**

| Locus     | Annotation                                                                                                                                                                                                                                                                                                                                              | Root Hairs (COBL9) | Non-Hair Epidermis (WER) | Cortex (CORTEX) | Endodermis/ Quiescent (SCR) | Vasculature (WOL) | Columella (PET111) |
|-----------|---------------------------------------------------------------------------------------------------------------------------------------------------------------------------------------------------------------------------------------------------------------------------------------------------------------------------------------------------------|--------------------|--------------------------|-----------------|-----------------------------|-------------------|--------------------|
| AT4G32520 | glycine hydroxymethyltransferase, putative / serine hydroxymethyltransferase, putative / serine/threonine aldolase, putative, similar to serine hydroxymethyltransferase (Chlamydomonas reinhardtii) GI:17066746; contains Pfam profile PF00464: serine hydroxymethyltransferase                                                                        | 1                  | 1                        | 1               | 0                           | 1                 | 0                  |
| AT4G33010 | glycine dehydrogenase (decarboxylating), putative / glycine decarboxylase, putative / glycine cleavage system P-protein, putative, strong similarity to SP:P49361 Glycine dehydrogenase (decarboxylating) A, mitochondrial precursor (EC 1.4.4.2) {Flaveria pringlei}; contains Pfam profile PF02347: Glycine cleavage system P-protein                 | 1                  | 1                        | 1               | 1                           | 1                 | 0                  |
| AT4G33580 | carbonic anhydrase family protein / carbonate dehydratase family protein, similar to SP:P46512 Carbonic anhydrase 1 (EC 4.2.1.1) (Carbonate dehydratase 1) {Flaveria linearis}; contains Pfam profile PF00484: Carbonic anhydrase                                                                                                                       | 1                  | 1                        | 0               | 1                           | 0                 | 0                  |
| AT4G33680 | AGD2__aminotransferase class I and II family protein, low similarity to Aromatic Aminotransferase from Pyrococcus horikoshii GP:14278621; contains Pfam profile PF00155 aminotransferase, classes I and II                                                                                                                                              | 1                  | 1                        | 1               | 1                           | 1                 | 1                  |
| AT4G34640 | SQS1_ERG9__farnesyl-diphosphate farnesyltransferase 1 / squalene synthase 1 (SQS1), identical to SP:P53799 Farnesyl-diphosphate farnesyltransferase (EC 2.5.1.21) (Squalene synthetase) (SQS) (SS) (FPP:FPP farnesyltransferase) {Arabidopsis thaliana}; non-consensus GC donor splice site at exon 3, squalene synthase 2 (SQS2), Arabidopsis thaliana | 1                  | 1                        | 1               | 0                           | 1                 | 1                  |

**Supplementary Tables pertaining to Figure 2**

**Supplementary Table S8. Proteins of the root cellular proteome that are in the AraCyc Plant Metabolic Network**

| Locus     | Annotation                                                                                                                                                                                                                                                                                                            | Root Hairs (COBL9) | Non-Hair Epidermis (WER) | Cortex (CORTEX) | Endodermis/ Quiescent (SCR) | Vasculature (WOL) | Columella (PET111) |
|-----------|-----------------------------------------------------------------------------------------------------------------------------------------------------------------------------------------------------------------------------------------------------------------------------------------------------------------------|--------------------|--------------------------|-----------------|-----------------------------|-------------------|--------------------|
| AT4G35000 | APX3__L-ascorbate peroxidase 3 (APX3), identical to ascorbate peroxidase 3 (Arabidopsis thaliana) GI:2444019, L-ascorbate peroxidase (Arabidopsis thaliana) gi:1523791:emb:CAA66926; similar to ascorbate peroxidase (Gossypium hirsutum) gi:1019946:gb:AAB52954                                                      | 1                  | 1                        | 1               | 1                           | 1                 | 1                  |
| AT4G35090 | CAT2__catalase 2, identical to catalase 2 SP:P25819, GI:17865693 from (Arabidopsis thaliana)                                                                                                                                                                                                                          | 1                  | 1                        | 1               | 1                           | 1                 | 1                  |
| AT4G35260 | IDH1__isocitrate dehydrogenase subunit 1 / NAD+ isocitrate dehydrogenase subunit 1, nearly identical to NAD+ dependent isocitrate dehydrogenase subunit 1 (Arabidopsis thaliana) GI:1766046                                                                                                                           | 1                  | 1                        | 1               | 1                           | 1                 | 1                  |
| AT4G35630 | PSAT__phosphoserine aminotransferase, chloroplast (PSAT), identical to Phosphoserine aminotransferase, chloroplast precursor (PSAT) (SP:Q96255)(Arabidopsis thaliana); contains TIGRFAM TIGR01364: phosphoserine aminotransferase; contains Pfam PF00266: aminotransferase, class V                                   | 1                  | 0                        | 1               | 1                           | 1                 | 1                  |
| AT4G35790 | ATPLDELTA_PLDELTA__phospholipase D delta / PLD delta (PLDELTA), identical to phospholipase D delta SP: Q9C5Y0 from (Arabidopsis thaliana); supporting cDNA gi:11761141:dbj:AB031047.1:                                                                                                                                | 0                  | 1                        | 1               | 0                           | 1                 | 1                  |
| AT4G35830 | aconitate hydratase, cytoplasmic / citrate hydro-lyase / aconitase (ACO), identical to SP:Q42560 Aconitate hydratase, cytoplasmic (EC 4.2.1.3) (Citrate hydro-lyase) (Aconitase) {Arabidopsis thaliana}; contains Pfam profiles PF00330: Aconitase family (aconitate hydratase), PF00694: Aconitase C-terminal domain | 1                  | 0                        | 1               | 1                           | 1                 | 1                  |

**Supplementary Tables pertaining to Figure 2**

**Supplementary Table S8. Proteins of the root cellular proteome that are in the AraCyc Plant Metabolic Network**

| Locus     | Annotation                                                                                                                                                                                                                                                                                                                                                                                        | Root Hairs (COBL9) | Non-Hair Epidermis (WER) | Cortex (CORTEX) | Endodermis/ Quiescent (SCR) | Vasculature (WOL) | Columella (PET111) |
|-----------|---------------------------------------------------------------------------------------------------------------------------------------------------------------------------------------------------------------------------------------------------------------------------------------------------------------------------------------------------------------------------------------------------|--------------------|--------------------------|-----------------|-----------------------------|-------------------|--------------------|
| AT4G36250 | ALDH3F1__aldehyde dehydrogenase family protein, contains aldehyde dehydrogenase (NADP) family protein domain, Pfam:PF00171                                                                                                                                                                                                                                                                        | 1                  | 1                        | 0               | 0                           | 0                 | 0                  |
| AT4G36480 | ATLCB1__aminotransferase class I and II family protein, similar to Serine palmitoyltransferase 1 (EC 2.3.1.50) from Homo sapiens (SP:O15269), Mus musculus (SP:O35704), Cricetus griseus (SP:O54695)                                                                                                                                                                                              | 1                  | 0                        | 1               | 0                           | 1                 | 0                  |
| AT4G37830 | cytochrome c oxidase-related, contains weak similarity to cytochrome c oxidase polypeptide VIa-liver, mitochondrial precursor (EC 1.9.3.1) (Swiss-Prot:P10818) (Rattus norvegicus)                                                                                                                                                                                                                | 1                  | 0                        | 1               | 0                           | 1                 | 1                  |
| AT4G37870 | phosphoenolpyruvate carboxykinase (ATP), putative / PEP carboxykinase, putative / PEPCK, putative, similar to phosphoenolpyruvate carboxykinase (Lycopersicon esculentum) GI:16950587, SP:Q9SLZ0 Phosphoenolpyruvate carboxykinase (ATP) (EC 4.1.1.49) (PEP carboxykinase) (Phosphoenolpyruvate carboxylase) (PEPCK) {Zea mays}; contains Pfam profile PF01293: phosphoenolpyruvate carboxykinase | 0                  | 1                        | 0               | 0                           | 1                 | 1                  |
| AT4G38800 | phosphorylase family protein, contains weak similarity to Swiss-Prot:O51931 nucleosidase (Includes: 5`-methylthioadenosine nucleosidase (EC 3.2.2.16); S-adenosylhomocysteine nucleosidase (Buchnera aphidicola)                                                                                                                                                                                  | 0                  | 0                        | 0               | 1                           | 1                 | 0                  |
| AT4G39120 | inositol monophosphatase family protein, low similarity to Mono-phosphatase (Streptomyces anulatus) GI:1045231; contains Pfam profile PF00459: Inositol monophosphatase family                                                                                                                                                                                                                    | 1                  | 0                        | 0               | 0                           | 1                 | 0                  |
| AT4G39980 | DHS1__2-dehydro-3-deoxyphosphoheptonate aldolase 1 / 3-deoxy-D-arabino-heptulosonate 7-phosphate synthase 1 / DAHP synthetase 1 (DHS1), nearly identical to SP:P29965                                                                                                                                                                                                                             | 1                  | 1                        | 1               | 0                           | 1                 | 0                  |



**Supplementary Tables pertaining to Figure 2**

**Supplementary Table S8. Proteins of the root cellular proteome that are in the AraCyc Plant Metabolic Network**

| Locus     | Annotation                                                                                                                                                                 | Root Hairs<br>(COBL9) | Non-Hair<br>Epidermis<br>(WER) | Cortex<br>(CORTEX) | Endodermis/<br>Quiescent<br>(SCR) | Vasculature<br>(WOL) | Columella<br>(PET111) |
|-----------|----------------------------------------------------------------------------------------------------------------------------------------------------------------------------|-----------------------|--------------------------------|--------------------|-----------------------------------|----------------------|-----------------------|
| AT5G01220 | SQD2__UDP-sulfoquinovose:DAG<br>sulfoquinovosyltransferase / sulfolipid synthase<br>(SQD2), identical to GI:20302857                                                       | 1                     | 0                              | 0                  | 0                                 | 0                    | 0                     |
| AT5G03290 | isocitrate dehydrogenase, putative / NAD+<br>isocitrate dehydrogenase, putative, strong<br>similarity to isocitrate dehydrogenase (NAD+)<br>(Nicotiana tabacum) GI:3021506 | 1                     | 1                              | 1                  | 0                                 | 1                    | 1                     |
| AT5G03300 | ADK2__adenosine kinase 2 (ADK2), contains<br>Pfam profile: PF00294 pfkB family carbohydrate<br>kinase; identical to cDNA adenosine kinase 2<br>(ADK2) GI:12017763          | 0                     | 0                              | 0                  | 1                                 | 1                    | 0                     |
| AT5G03630 | monodehydroascorbate reductase, putative,<br>monodehydroascorbate reductase (NADH),<br>cucumber, PIR:JU0182                                                                | 1                     | 1                              | 1                  | 1                                 | 1                    | 1                     |
| AT5G03860 | malate synthase, putative, strong similarity to<br>glyoxysomal malate synthase from Brassica<br>napus (SP:P13244)                                                          | 0                     | 0                              | 1                  | 0                                 | 0                    | 0                     |
| AT5G04590 | SIR__sulfite reductase / ferredoxin (SIR), identical<br>to sulfite reductase (Arabidopsis thaliana)<br>GI:804953, GI:2584721                                               | 1                     | 1                              | 1                  | 1                                 | 1                    | 1                     |
| AT5G04960 | pectinesterase family protein, contains Pfam<br>profile: PF01095 pectinesterase                                                                                            | 1                     | 0                              | 0                  | 0                                 | 0                    | 0                     |
| AT5G05170 | CESA3_ATCESA3_ATH-<br>B_CEV1_IXR1__cellulose synthase, catalytic<br>subunit (Ath-B), nearly identical to gi:2827143,<br>cellulose synthase, catalytic subunit (Ath-B)      | 1                     | 1                              | 1                  | 1                                 | 1                    | 0                     |
| AT5G05690 | CPD_CBB3_CYP90_CYP90A_CYP90A1_DWF3_<br>_cytochrome P450 90A1 (CYP90A1) (CYP90)<br>(CPD), identical to Cytochrome P450 90A1<br>(SP:Q42569) (Arabidopsis thaliana)           | 0                     | 0                              | 0                  | 0                                 | 1                    | 0                     |
| AT5G07440 | GDH2__glutamate dehydrogenase 2 (GDH2),<br>identical to glutamate dehydrogenase 2 (GDH 2)<br>(Arabidopsis thaliana) SWISS-PROT:Q38946                                      | 1                     | 1                              | 1                  | 1                                 | 1                    | 1                     |

**Supplementary Tables pertaining to Figure 2**

**Supplementary Table S8. Proteins of the root cellular proteome that are in the AraCyc Plant Metabolic Network**

| Locus     | Annotation                                                                                                                                                                                                                                                                                                                                                                                                                                                                                                                              | Root Hairs (COBL9) | Non-Hair Epidermis (WER) | Cortex (CORTEX) | Endodermis/ Quiescent (SCR) | Vasculature (WOL) | Columella (PET111) |
|-----------|-----------------------------------------------------------------------------------------------------------------------------------------------------------------------------------------------------------------------------------------------------------------------------------------------------------------------------------------------------------------------------------------------------------------------------------------------------------------------------------------------------------------------------------------|--------------------|--------------------------|-----------------|-----------------------------|-------------------|--------------------|
| AT5G07990 | TT7_CYP75B1_D501_F3`H__flavonoid 3`-monooxygenase / flavonoid 3`-hydroxylase (F3`H) / cytochrome P450 75B1 (CYP75B1) / transparent testa 7 protein (TT7), identical to SP:Q9SD85 Flavonoid 3`-monooxygenase (EC 1.14.13.21) (Flavonoid 3`-hydroxylase) (AtF3`H) (Cytochrome P450 75B1) (TRANSPARENT TESTA 7 protein) {Arabidopsis thaliana}; similar to gi:10334806, gi:10334808                                                                                                                                                        | 0                  | 0                        | 1               | 0                           | 0                 | 0                  |
| AT5G08280 | hydroxymethylbilane synthase / porphobilinogen deaminase, chloroplast / pre-uroporphyrinogen synthase, identical to SP:Q43316                                                                                                                                                                                                                                                                                                                                                                                                           | 1                  | 0                        | 0               | 1                           | 1                 | 0                  |
| AT5G08300 | succinyl-CoA ligase (GDP-forming) alpha-chain, mitochondrial, putative / succinyl-CoA synthetase, alpha chain, putative / SCS-alpha, putative, identical to SP:P53586 Succinyl-CoA ligase (GDP-forming) alpha-chain, mitochondrial precursor (EC 6.2.1.4) (Succinyl-CoA synthetase, alpha chain) (SCS-alpha) {Arabidopsis thaliana}; strong similarity to SP:P13086 Succinyl-CoA ligase (GDP-forming) alpha-chain, mitochondrial precursor {Rattus norvegicus}; contains Pfam profiles PF00549: CoA-ligase, PF02629: CoA binding domain | 1                  | 1                        | 1               | 1                           | 1                 | 1                  |
| AT5G08530 | NADH-ubiquinone oxidoreductase 51 kDa subunit, mitochondrial, putative, similar to NADH-ubiquinone oxidoreductase 51 kDa subunit, mitochondrial precursor (EC 1.6.5.3) (EC 1.6.99.3) from {Homo sapiens} SP:P49821, {Bos taurus} SP:P25708, {Aspergillus niger} SP:Q92406; contains Pfam profile PF01512: Respiratory-chain NADH dehydrogenase 51 Kd subunit                                                                                                                                                                            | 1                  | 1                        | 1               | 1                           | 1                 | 1                  |

**Supplementary Tables pertaining to Figure 2**

**Supplementary Table S8. Proteins of the root cellular proteome that are in the AraCyc Plant Metabolic Network**

| Locus     | Annotation                                                                                                                                                                                                                                                                                                                 | Root Hairs (COBL9) | Non-Hair Epidermis (WER) | Cortex (CORTEX) | Endodermis/ Quiescent (SCR) | Vasculature (WOL) | Columella (PET111) |
|-----------|----------------------------------------------------------------------------------------------------------------------------------------------------------------------------------------------------------------------------------------------------------------------------------------------------------------------------|--------------------|--------------------------|-----------------|-----------------------------|-------------------|--------------------|
| AT5G09420 | chloroplast outer membrane translocon subunit, putative, similar to component of chloroplast outer membrane translocon Toc64 ( <i>Pisum sativum</i> ) GI:7453538; contains Pfam profiles PF01425: Amidase, PF00515: TPR Domain                                                                                             | 0                  | 0                        | 0               | 0                           | 1                 | 0                  |
| AT5G09650 | inorganic pyrophosphatase family protein, similar to SP:Q15181 Inorganic pyrophosphatase (EC 3.6.1.1) (Pyrophosphate { <i>Homo sapiens</i> }); contains Pfam profile PF00719: inorganic pyrophosphatase                                                                                                                    | 1                  | 1                        | 1               | 0                           | 1                 | 1                  |
| AT5G10100 | trehalose-6-phosphate phosphatase, putative, similar to trehalose-6-phosphate phosphatase (AtTPPB) ( <i>Arabidopsis thaliana</i> ) GI:2944180; contains Pfam profile PF02358: Trehalose-phosphatase                                                                                                                        | 0                  | 0                        | 0               | 1                           | 0                 | 0                  |
| AT5G10920 | argininosuccinate lyase, putative / arginosuccinase, putative, similar to argininosuccinate lyase ( <i>Nostoc punctiforme</i> ) GI:7672743; contains Pfam profile PF00206: Lyase                                                                                                                                           | 1                  | 1                        | 0               | 0                           | 1                 | 0                  |
| AT5G11520 | ASP3_YLS4_YSL4__aspartate aminotransferase, chloroplast / transaminase A (ASP3) (YLS4), identical to SP:P46644 Aspartate aminotransferase, chloroplast precursor (EC 2.6.1.1) (Transaminase A) { <i>Arabidopsis thaliana</i> }; identical to cDNA YLS4 mRNA for aspartate aminotransferase (ASP3), partial cds GI:13122285 | 1                  | 1                        | 1               | 0                           | 1                 | 1                  |
| AT5G11770 | NADH-ubiquinone oxidoreductase 20 kDa subunit, mitochondrial, identical to NADH-ubiquinone oxidoreductase 20 kDa subunit mitochondrial (precursor) SP:Q42577 from ( <i>Arabidopsis thaliana</i> ); contains Pfam profile: PF01058 NADH ubiquinone oxidoreductase, 20 Kd subunit                                            | 1                  | 1                        | 1               | 1                           | 1                 | 1                  |

**Supplementary Tables pertaining to Figure 2**

**Supplementary Table S8. Proteins of the root cellular proteome that are in the AraCyc Plant Metabolic Network**

| Locus     | Annotation                                                                                                                                                                                                                                                                                                                               | Root Hairs (COBL9) | Non-Hair Epidermis (WER) | Cortex (CORTEX) | Endodermis/ Quiescent (SCR) | Vasculature (WOL) | Columella (PET111) |
|-----------|------------------------------------------------------------------------------------------------------------------------------------------------------------------------------------------------------------------------------------------------------------------------------------------------------------------------------------------|--------------------|--------------------------|-----------------|-----------------------------|-------------------|--------------------|
| AT5G11880 | diaminopimelate decarboxylase, putative / DAP carboxylase, putative, similar to diaminopimelate decarboxylase (Arabidopsis thaliana) GI:6562332; contains Pfam profiles PF02784: Pyridoxal-dependent decarboxylase pyridoxal binding domain, PF00278: Pyridoxal-dependent decarboxylase C-terminal sheet domain                          | 1                  | 1                        | 1               | 1                           | 1                 | 1                  |
| AT5G12200 | dihydropyrimidinase / DHPase / dihydropyrimidine amidohydrolase / hydantoinase (PYD2), identical to dihydropyrimidine amidohydrolase (PYD2) (Arabidopsis thaliana) GI:28194047; similar to SP:Q9EQF5 Dihydropyrimidinase (EC 3.5.2.2) (DHPase) (Hydantoinase) (DHP) {Mus musculus}; contains Pfam profile PF01979: Amidohydrolase family | 1                  | 0                        | 0               | 0                           | 0                 | 0                  |
| AT5G13110 | G6PD2__Encodes a plastidic glucose-6-phosphate dehydrogenase that is sensitive to reduction by DTT and whose mRNA is most highly expressed in root.                                                                                                                                                                                      | 0                  | 0                        | 0               | 1                           | 1                 | 0                  |
| AT5G13280 | AK-LYS1_AK__aspartate kinase, identical to aspartate kinase (Arabidopsis thaliana) GI:4376158                                                                                                                                                                                                                                            | 1                  | 1                        | 0               | 0                           | 0                 | 0                  |
| AT5G13640 | ATPDAT__lecithin:cholesterol acyltransferase family protein / LACT family protein, similar to SP:P40345 Phospholipid:diacylglycerol acyltransferase (EC 2.3.1.158) (PDAT) {Saccharomyces cerevisiae}; contains Pfam profile PF02450: Lecithin:cholesterol acyltransferase (phosphatidylcholine-sterol acyltransferase)                   | 1                  | 0                        | 1               | 0                           | 0                 | 0                  |
| AT5G13930 | CHS_ATCHS_TT4__chalcone synthase / naringenin-chalcone synthase, identical to SP:P13114                                                                                                                                                                                                                                                  | 0                  | 0                        | 1               | 0                           | 1                 | 0                  |
| AT5G14060 | CARAB-AK-LYS__aspartate kinase, lysine-sensitive, nearly identical to gi:2257743                                                                                                                                                                                                                                                         | 1                  | 0                        | 0               | 0                           | 0                 | 0                  |

**Supplementary Tables pertaining to Figure 2**

**Supplementary Table S8. Proteins of the root cellular proteome that are in the AraCyc Plant Metabolic Network**

| Locus     | Annotation                                                                                                                                                                                                                                                                                                                                                                                                                                | Root Hairs (COBL9) | Non-Hair Epidermis (WER) | Cortex (CORTEX) | Endodermis/ Quiescent (SCR) | Vasculature (WOL) | Columella (PET111) |
|-----------|-------------------------------------------------------------------------------------------------------------------------------------------------------------------------------------------------------------------------------------------------------------------------------------------------------------------------------------------------------------------------------------------------------------------------------------------|--------------------|--------------------------|-----------------|-----------------------------|-------------------|--------------------|
| AT5G14220 | protoporphyrinogen oxidase, putative, similar to protoporphyrinogen IX oxidase, mitochondrial (PPO II) from <i>Nicotiana tabacum</i> (SP:O24164), <i>Glycine max</i> , AB025102, <i>Spinacia oleracea</i> (GI:14349153); contains Pfam amine oxidase, flavin-containing domain (PF015930)                                                                                                                                                 | 0                  | 0                        | 1               | 0                           | 0                 | 0                  |
| AT5G14950 | glycosyl hydrolase family 38 protein, similar to alpha-mannosidase II SP:P27046 from ( <i>Mus musculus</i> )                                                                                                                                                                                                                                                                                                                              | 1                  | 1                        | 1               | 0                           | 1                 | 0                  |
| AT5G15490 | UDP-glucose 6-dehydrogenase, putative, very strong similarity to SP:Q96558 UDP-glucose 6-dehydrogenase (EC 1.1.1.22) (UDP-Glc dehydrogenase) (UDP-GlcDH) (UDPGDH) { <i>Glycine max</i> }; contains Pfam profiles PF03721: UDP-glucose/GDP-mannose dehydrogenase family NAD binding domain, PF00984: UDP-glucose/GDP-mannose dehydrogenase family central domain, PF03720: UDP-glucose/GDP-mannose dehydrogenase family UDP binding domain | 0                  | 0                        | 0               | 0                           | 0                 | 1                  |
| AT5G16230 | acyl-(acyl-carrier-protein) desaturase, putative / stearoyl-ACP desaturase, putative, similar to Acyl-(acyl-carrier protein) desaturase from <i>Spinacia oleracea</i> SP:P28645, <i>Ricinus communis</i> SP:P22337; contains Pfam profile PF03405 Fatty acid desaturase                                                                                                                                                                   | 0                  | 1                        | 0               | 0                           | 0                 | 0                  |
| AT5G16390 | CAC1_BCCP_BCCP1_CAC1A__biotin carboxyl carrier protein 1 (BCCP1), identical to biotin carboxyl carrier protein of acetyl-CoA carboxylase precursor ( <i>Arabidopsis thaliana</i> ) gi:9759121:dbj:BAB09606                                                                                                                                                                                                                                | 1                  | 0                        | 0               | 0                           | 0                 | 0                  |

**Supplementary Tables pertaining to Figure 2**

**Supplementary Table S8. Proteins of the root cellular proteome that are in the AraCyc Plant Metabolic Network**

| Locus     | Annotation                                                                                                                                                                                                                                                                                                                                                                                                                                                     | Root Hairs (COBL9) | Non-Hair Epidermis (WER) | Cortex (CORTEX) | Endodermis/ Quiescent (SCR) | Vasculature (WOL) | Columella (PET111) |
|-----------|----------------------------------------------------------------------------------------------------------------------------------------------------------------------------------------------------------------------------------------------------------------------------------------------------------------------------------------------------------------------------------------------------------------------------------------------------------------|--------------------|--------------------------|-----------------|-----------------------------|-------------------|--------------------|
| AT5G16440 | IPP1_IDI1__similar to MutT/nudix family protein [Arabidopsis thaliana] (TAIR:At1g79690.1); similar to isopentenyl pyrophosphate:dimethylallyl pyrophosphate isomerase [Adonis palaestina] (GB:AAF29973.1); similar to isopentenyl pyrophosphate isomerase [Pueraria montana var. lobata] (GB:AAQ84167.1); contains InterPro domain Isopentenyl-diphosphate delta-isomerase (InterPro:IPR002667); contains InterPro domain NUDIX hydrolase (InterPro:IPR000086) | 1                  | 0                        | 0               | 0                           | 1                 | 0                  |
| AT5G17310 | UTP--glucose-1-phosphate uridylyltransferase, putative / UDP-glucose pyrophosphorylase, putative / UGPase, putative, strong similarity to SP:P19595 UTP--glucose-1-phosphate uridylyltransferase (EC 2.7.7.9) (UDP-glucose pyrophosphorylase) (UDPGP) (UGPase) {Solanum tuberosum}; contains Pfam profile PF01704: UTP--glucose-1-phosphate uridylyltransferase                                                                                                | 0                  | 1                        | 1               | 1                           | 1                 | 0                  |
| AT5G17530 | phosphoglucosamine mutase family protein, low similarity to phosphoglucomutase/phosphomannomutase (Sphingomonas paucimobilis) GI:6103619; contains InterPro accession IPR006352: Phosphoglucosamine mutase                                                                                                                                                                                                                                                     | 1                  | 1                        | 0               | 0                           | 1                 | 0                  |
| AT5G17920 | ATMETS_ATMS1_ATCIMS__The protein undergoes thiolation following treatment with the oxidant tert-butylhydroperoxide.                                                                                                                                                                                                                                                                                                                                            | 1                  | 1                        | 1               | 1                           | 1                 | 1                  |
| AT5G18170 | GDH1__glutamate dehydrogenase 1 (GDH1), identical to glutamate dehydrogenase 1 (GDH 1) (Arabidopsis thaliana) SWISS-PROT:Q43314                                                                                                                                                                                                                                                                                                                                | 1                  | 1                        | 1               | 1                           | 1                 | 1                  |
| AT5G19440 | similar to Eucalyptus gunnii alcohol dehydrogenase of unknown physiological function (GI:1143445), apple tree, PIR:T16995; NOT a cinnamyl-alcohol dehydrogenase                                                                                                                                                                                                                                                                                                | 1                  | 0                        | 1               | 0                           | 1                 | 0                  |

**Supplementary Tables pertaining to Figure 2**

**Supplementary Table S8. Proteins of the root cellular proteome that are in the AraCyc Plant Metabolic Network**

| Locus     | Annotation                                                                                                                                                                                                                                                                                                                                                                                                                                                                                                                             | Root Hairs (COBL9) | Non-Hair Epidermis (WER) | Cortex (CORTEX) | Endodermis/ Quiescent (SCR) | Vasculature (WOL) | Columella (PET111) |
|-----------|----------------------------------------------------------------------------------------------------------------------------------------------------------------------------------------------------------------------------------------------------------------------------------------------------------------------------------------------------------------------------------------------------------------------------------------------------------------------------------------------------------------------------------------|--------------------|--------------------------|-----------------|-----------------------------|-------------------|--------------------|
| AT5G19550 | ASP2_AAT2__aspartate aminotransferase, cytoplasmic isozyme 1 / transaminase A (ASP2), identical to SP:P46645 Aspartate aminotransferase, cytoplasmic isozyme 1 (EC 2.6.1.1) (Transaminase A) {Arabidopsis thaliana}                                                                                                                                                                                                                                                                                                                    | 1                  | 0                        | 0               | 0                           | 1                 | 0                  |
| AT5G20960 | AAO1_AO1_ATAO_ATAO1__aldehyde oxidase 1 (AAO1), identical to aldehyde oxidase AAO1 from Arabidopsis thaliana (gi:3172023) isoform contains a GA-donor splice site at intron 10                                                                                                                                                                                                                                                                                                                                                         | 0                  | 0                        | 1               | 1                           | 0                 | 1                  |
| AT5G20980 | ATMS3__5-methyltetrahydropteroyltriglutamate--homocysteine methyltransferase, putative / vitamin-B12-independent methionine synthase, putative / cobalamin-independent methionine synthase, putative, strong similarity to SP:O50008 5-methyltetrahydropteroyltriglutamate--homocysteine methyltransferase (EC 2.1.1.14) (Vitamin-B12-independent methionine synthase isozyme) (Cobalamin-independent methionine synthase isozyme) {Arabidopsis thaliana}; contains Pfam profile PF01717: Methionine synthase, vitamin-B12 independent | 1                  | 0                        | 0               | 0                           | 0                 | 0                  |
| AT5G23250 | succinyl-CoA ligase (GDP-forming) alpha-chain, mitochondrial, putative / succinyl-CoA synthetase, alpha chain, putative / SCS-alpha, putative, similar to SP:P36967 Succinyl-CoA ligase (GDP-forming) alpha-chain, mitochondrial precursor (EC 6.2.1.4) (Succinyl-CoA synthetase, alpha chain) (SCS-alpha) {Dictyostelium discoideum}; contains Pfam profiles PF00549: CoA-ligase, PF02629: CoA binding domain                                                                                                                         | 1                  | 0                        | 0               | 0                           | 1                 | 0                  |

**Supplementary Tables pertaining to Figure 2**

**Supplementary Table S8. Proteins of the root cellular proteome that are in the AraCyc Plant Metabolic Network**

| Locus     | Annotation                                                                                                                                                                                                                                                                                                                         | Root Hairs (COBL9) | Non-Hair Epidermis (WER) | Cortex (CORTEX) | Endodermis/ Quiescent (SCR) | Vasculature (WOL) | Columella (PET111) |
|-----------|------------------------------------------------------------------------------------------------------------------------------------------------------------------------------------------------------------------------------------------------------------------------------------------------------------------------------------|--------------------|--------------------------|-----------------|-----------------------------|-------------------|--------------------|
| AT5G23300 | PYRD__dihydroorotate dehydrogenase, mitochondrial / dihydroorotate oxidase / DHOdehase (PYRD), nearly identical to SP:P32746 Dihydroorotate dehydrogenase, mitochondrial precursor (EC 1.3.3.1) (Dihydroorotate oxidase) (DHOdehase) {Arabidopsis thaliana}; identical to cDNA pyrD mRNA for dihydroorotate dehydrogenase GI:16448 | 1                  | 1                        | 1               | 1                           | 1                 | 1                  |
| AT5G23670 | LCB2_ATLCB2__serine C-palmitoyltransferase (LCB2), identical to serine palmitoyltransferase (Arabidopsis thaliana) GI:9309380; similar to serine palmitoyltransferase from Solanum tuberosum (GI:4995890), Homo sapiens (SP:O15270), Mus musculus (SP:P97363); contains Pfam profile PF00155: aminotransferase, classes I and II   | 1                  | 0                        | 0               | 0                           | 1                 | 0                  |
| AT5G26030 | ferrochelatase I, identical to Swiss-Prot:P42043 ferrochelatase I, chloroplast/mitochondrial precursor (EC 4.99.1.1) (Protoheme ferro-lyase) (Heme synthetase) (Arabidopsis thaliana)                                                                                                                                              | 1                  | 1                        | 1               | 0                           | 1                 | 0                  |
| AT5G26667 | uridylyate kinase / uridine monophosphate kinase / UMP kinase (PYR6), identical to uridylyate kinase / UMP/CMP kinase SP:O04905 from (Arabidopsis thaliana)                                                                                                                                                                        | 1                  | 0                        | 0               | 1                           | 0                 | 0                  |
| AT5G26710 | glutamate-tRNA ligase, putative / glutamyl-tRNA synthetase, putative / GluRS, putative, identical to gi:3435196                                                                                                                                                                                                                    | 1                  | 0                        | 0               | 0                           | 1                 | 0                  |



**Supplementary Tables pertaining to Figure 2**

**Supplementary Table S8. Proteins of the root cellular proteome that are in the AraCyc Plant Metabolic Network**

| Locus     | Annotation                                                                                                                                                                                                                                                                                                                                                                          | Root Hairs (COBL9) | Non-Hair Epidermis (WER) | Cortex (CORTEX) | Endodermis/ Quiescent (SCR) | Vasculature (WOL) | Columella (PET111) |
|-----------|-------------------------------------------------------------------------------------------------------------------------------------------------------------------------------------------------------------------------------------------------------------------------------------------------------------------------------------------------------------------------------------|--------------------|--------------------------|-----------------|-----------------------------|-------------------|--------------------|
| AT5G26780 | glycine hydroxymethyltransferase, putative / serine hydroxymethyltransferase, putative / serine/threonine aldolase, putative, strong similarity to SP:P50433 Serine hydroxymethyltransferase, mitochondrial precursor (EC 2.1.2.1) (Serine methylase) (Glycine hydroxymethyltransferase) (SHMT) {Solanum tuberosum}; contains Pfam profile PF00464: serine hydroxymethyltransferase | 1                  | 1                        | 1               | 1                           | 1                 | 0                  |
| AT5G26830 | threonyl-tRNA synthetase / threonine--tRNA ligase (THRRS), identical to SP:O04630 Threonyl-tRNA synthetase, mitochondrial precursor (EC 6.1.1.3) (Threonine--tRNA ligase) (ThrRS) {Arabidopsis thaliana}                                                                                                                                                                            | 1                  | 0                        | 0               | 1                           | 1                 | 0                  |
| AT5G27600 | LACS7__AMP-binding protein, putative, similar to AMP-binding protein (MF39P) gi:1617274 from Brassica napus, long-chain-fatty-acid--CoA ligase - Brassica napus, EMBL:Z72152; contains Pfam AMP-binding enzyme domain PF00501                                                                                                                                                       | 0                  | 1                        | 1               | 0                           | 0                 | 0                  |
| AT5G35360 | CAC2__acetyl-CoA carboxylase, biotin carboxylase subunit (CAC2), identical to acetyl-CoA carboxylase, biotin carboxylase subunit (CAC2) (Arabidopsis thaliana) GI:1905876                                                                                                                                                                                                           | 1                  | 1                        | 1               | 1                           | 1                 | 1                  |
| AT5G35630 | GS2_ATGSL1_GLN2__glutamine synthetase (GS2), identical to glutamine synthetase, chloroplast precursor (glutamate-- ammonia ligase, GS2) (Arabidopsis thaliana) SWISS-PROT:Q43127                                                                                                                                                                                                    | 1                  | 1                        | 1               | 1                           | 1                 | 1                  |
| AT5G36880 | acetyl-CoA synthetase, putative / acetate-CoA ligase, putative, similar to SP:P27550 (Escherichia coli) and gi:8439651 (Homo sapiens); contains Pfam AMP-binding enzyme domain PF00501                                                                                                                                                                                              | 1                  | 1                        | 0               | 0                           | 1                 | 0                  |

**Supplementary Tables pertaining to Figure 2**

**Supplementary Table S8. Proteins of the root cellular proteome that are in the AraCyc Plant Metabolic Network**

| Locus     | Annotation                                                                                                                                                                                                                                                                                                                                                                                                                       | Root Hairs (COBL9) | Non-Hair Epidermis (WER) | Cortex (CORTEX) | Endodermis/Quiescent (SCR) | Vasculature (WOL) | Columella (PET111) |
|-----------|----------------------------------------------------------------------------------------------------------------------------------------------------------------------------------------------------------------------------------------------------------------------------------------------------------------------------------------------------------------------------------------------------------------------------------|--------------------|--------------------------|-----------------|----------------------------|-------------------|--------------------|
| AT5G37510 | EMB1467__NADH-ubiquinone dehydrogenase, mitochondrial, putative, similar to NADH-ubiquinone oxidoreductase 75 kDa subunit, mitochondrial from <i>Solanum tuberosum</i> (SP:Q43644)                                                                                                                                                                                                                                               | 1                  | 1                        | 1               | 1                          | 1                 | 1                  |
| AT5G37830 | hydantoinase/oxoprolinase family protein, contains Pfam profiles: PF02538 hydantoinase B/oxoprolinase, PF01968 hydantoinase/oxoprolinase, PF05378 hydantoinase/oxoprolinase N-terminal region                                                                                                                                                                                                                                    | 0                  | 0                        | 0               | 0                          | 1                 | 0                  |
| AT5G39320 | UDP-glucose 6-dehydrogenase, putative, very strong similarity to SP:Q96558 UDP-glucose 6-dehydrogenase (EC 1.1.1.22) (UDP-Glc dehydrogenase) (UDP-GlcDH) (UDPGDH) {Glycine max}; contains Pfam profiles PF03721: UDP-glucose/GDP-mannose dehydrogenase family NAD binding domain, PF00984: UDP-glucose/GDP-mannose dehydrogenase family central domain, PF03720: UDP-glucose/GDP-mannose dehydrogenase family UDP binding domain | 1                  | 0                        | 0               | 0                          | 1                 | 0                  |
| AT5G40650 | SDH2-2__succinate dehydrogenase, iron-sulphur subunit, mitochondrial (SDH2-2), nearly identical to mitochondrial succinate dehydrogenase iron-sulphur subunit (sdh2-2) (gi:12049600) from <i>Arabidopsis thaliana</i>                                                                                                                                                                                                            | 1                  | 0                        | 0               | 0                          | 1                 | 0                  |
| AT5G41670 | 6-phosphogluconate dehydrogenase family protein, contains Pfam profiles: PF00393 6-phosphogluconate dehydrogenase C-terminal domain, PF03446 NAD binding domain of 6-phosphogluconate                                                                                                                                                                                                                                            | 1                  | 1                        | 1               | 1                          | 1                 | 1                  |

**Supplementary Tables pertaining to Figure 2**

**Supplementary Table S8. Proteins of the root cellular proteome that are in the AraCyc Plant Metabolic Network**

| Locus     | Annotation                                                                                                                                                                                                                                                                                                                        | Root Hairs (COBL9) | Non-Hair Epidermis (WER) | Cortex (CORTEX) | Endodermis/ Quiescent (SCR) | Vasculature (WOL) | Columella (PET111) |
|-----------|-----------------------------------------------------------------------------------------------------------------------------------------------------------------------------------------------------------------------------------------------------------------------------------------------------------------------------------|--------------------|--------------------------|-----------------|-----------------------------|-------------------|--------------------|
| AT5G42650 | AOS_CYP74A__allene oxide synthase (AOS) / hydroperoxide dehydrase / cytochrome P450 74A (CYP74A), identical to Allene oxide synthase, chloroplast precursor (Hydroperoxide dehydrase) (Cytochrome P450 74A) (SP:Q96242) { <i>Arabidopsis thaliana</i> }                                                                           | 1                  | 1                        | 0               | 0                           | 0                 | 0                  |
| AT5G42740 | glucose-6-phosphate isomerase, cytosolic (PGIC), identical to SP:P34795 Glucose-6-phosphate isomerase, cytosolic (EC 5.3.1.9) (GPI) (Phosphoglucose isomerase) (PGI) (Phosphohexose isomerase) (PHI) { <i>Arabidopsis thaliana</i> }; contains Pfam profile PF00342: glucose-6-phosphate isomerase                                | 0                  | 0                        | 0               | 1                           | 1                 | 0                  |
| AT5G43780 | APS4__sulfate adenylyltransferase 4 / ATP-sulfurylase 4 (APS4), identical to ATP sulfurylase precursor (APS4) ( <i>Arabidopsis thaliana</i> ) GI:4633131                                                                                                                                                                          | 0                  | 0                        | 1               | 0                           | 0                 | 0                  |
| AT5G43940 | alcohol dehydrogenase class III / glutathione-dependent formaldehyde dehydrogenase / GSH-FDH (ADHIII), identical to gi:1143388                                                                                                                                                                                                    | 1                  | 0                        | 1               | 0                           | 1                 | 0                  |
| AT5G46180 | delta-OAT__ornithine aminotransferase, putative / ornithine--oxo-acid aminotransferase, putative, similar to SP:Q92413 Ornithine aminotransferase (EC 2.6.1.13) (Ornithine--oxo-acid aminotransferase) ( <i>Aspergillus nidulans</i> ) { <i>Emericella nidulans</i> }; contains Pfam profile PF00202: aminotransferase, class III | 0                  | 0                        | 0               | 0                           | 0                 | 1                  |
| AT5G46290 | KAS I__3-oxoacyl-(acyl-carrier-protein) synthase I, identical to Swiss-Prot:P52410 3-oxoacyl-(acyl-carrier-protein) synthase I, chloroplast precursor (EC 2.3.1.41) (Beta-ketoacyl-ACP synthase I) (KAS I) ( <i>Arabidopsis thaliana</i> )                                                                                        | 1                  | 1                        | 1               | 1                           | 1                 | 1                  |

**Supplementary Tables pertaining to Figure 2**

**Supplementary Table S8. Proteins of the root cellular proteome that are in the AraCyc Plant Metabolic Network**

| Locus     | Annotation                                                                                                                                                                                                                                                                                                                                                                                           | Root Hairs (COBL9) | Non-Hair Epidermis (WER) | Cortex (CORTEX) | Endodermis/ Quiescent (SCR) | Vasculature (WOL) | Columella (PET111) |
|-----------|------------------------------------------------------------------------------------------------------------------------------------------------------------------------------------------------------------------------------------------------------------------------------------------------------------------------------------------------------------------------------------------------------|--------------------|--------------------------|-----------------|-----------------------------|-------------------|--------------------|
| AT5G47770 | FPS1__farnesyl pyrophosphate synthetase 1, mitochondrial (FPS1) / FPP synthetase 1 / farnesyl diphosphate synthase 1, identical to SP:Q09152 Farnesyl pyrophosphate synthetase 1, mitochondrial precursor (FPP synthetase 1) (FPS 1) (Farnesyl diphosphate synthetase 1) (Includes: Dimethylallyltransferase (EC 2.5.1.1); Geranyltranstransferase (EC 2.5.1.10))<br>{ <i>Arabidopsis thaliana</i> } | 1                  | 0                        | 1               | 1                           | 1                 | 0                  |
| AT5G47780 | glycosyl transferase family 8 protein, contains Pfam profile: PF01501 glycosyl transferase family 8; strong similarity to unknown protein (emb:CAB71043.1)                                                                                                                                                                                                                                           | 1                  | 0                        | 0               | 0                           | 0                 | 0                  |
| AT5G47990 | CYP705A5__cytochrome P450 family protein, similar to Cytochrome P450 93A3 (P450 CP5) (SP:O81973) ( <i>Glycine max</i> );                                                                                                                                                                                                                                                                             | 1                  | 1                        | 1               | 0                           | 1                 | 1                  |
| AT5G48000 | CYP708A2__cytochrome P450 family protein, similar to steroid 22-alpha-hydroxylase; DWF4; CYP90B1 (GI:2935342) ( <i>Arabidopsis thaliana</i> )                                                                                                                                                                                                                                                        | 1                  | 1                        | 1               | 0                           | 1                 | 1                  |
| AT5G48010 | ATPEN1_04C11__Encodes an oxidosqualene cyclase involved in the biosynthesis of thalianol, a tricyclic triterpenoid of unknown function.                                                                                                                                                                                                                                                              | 1                  | 1                        | 1               | 0                           | 1                 | 0                  |
| AT5G48180 | kelch repeat-containing protein, contains Pfam PF01344: Kelch motif (5 repeats) ;similar to Tip elongation aberrant protein 1 (Cell polarity protein tea1) (SP:P87061) ( <i>Schizosaccharomyces pombe</i> )                                                                                                                                                                                          | 1                  | 0                        | 0               | 0                           | 0                 | 0                  |
| AT5G48230 | EMB1276__acetyl-CoA C-acyltransferase, putative / 3-ketoacyl-CoA thiolase, putative, strong similarity to Acetoacetyl-coenzyme A thiolase (E.C. 2.3.1.9) ( <i>Raphanus sativus</i> ) GI:1542941; contains InterPro accession IPR002155: Thiolase                                                                                                                                                     | 1                  | 0                        | 1               | 1                           | 1                 | 0                  |

**Supplementary Tables pertaining to Figure 2**

**Supplementary Table S8. Proteins of the root cellular proteome that are in the AraCyc Plant Metabolic Network**

| Locus     | Annotation                                                                                                                                                                                                                                                                                                     | Root Hairs<br>(COBL9) | Non-Hair<br>Epidermis<br>(WER) | Cortex<br>(CORTEX) | Endodermis/<br>Quiescent<br>(SCR) | Vasculature<br>(WOL) | Columella<br>(PET111) |
|-----------|----------------------------------------------------------------------------------------------------------------------------------------------------------------------------------------------------------------------------------------------------------------------------------------------------------------|-----------------------|--------------------------------|--------------------|-----------------------------------|----------------------|-----------------------|
| AT5G48300 | ADG1_APS1__glucose-1-phosphate adenylyltransferase small subunit 1 (APS1) / ADP-glucose pyrophosphorylase (ADG1), identical to SP:P55228                                                                                                                                                                       | 0                     | 0                              | 1                  | 0                                 | 0                    | 1                     |
| AT5G48880 | PKT1_PKT2_KAT5__acetyl-CoA C-acyltransferase 1 / 3-ketoacyl-CoA thiolase 1 (PKT1), identical to 3-keto-acyl-CoA-thiolase 1 (Arabidopsis thaliana) GI:3169568                                                                                                                                                   | 0                     | 0                              | 1                  | 0                                 | 0                    | 0                     |
| AT5G49030 | tRNA synthetase class I (I, L, M and V) family protein, similar to SP:P41972 Isoleucyl-tRNA synthetase (EC 6.1.1.5) (Isoleucine--tRNA ligase) (IleRS) {Staphylococcus aureus}; contains Pfam profile PF00133: tRNA synthetases class I (I, L, M and V)                                                         | 0                     | 1                              | 0                  | 0                                 | 0                    | 0                     |
| AT5G49460 | ACLB-2__ATP-citrate synthase, putative / ATP-citrate (pro-S-)-lyase, putative / citrate cleavage enzyme, putative, strong similarity to ATP:citrate lyase (Capsicum annuum) GI:13160653; contains Pfam profiles PF00549: CoA-ligase, PF02629: CoA binding domain                                               | 0                     | 1                              | 0                  | 1                                 | 1                    | 1                     |
| AT5G49720 | KOR1_DEC_KOR_OR16PEP_RSW2__endo-1,4-beta-glucanase KORRIGAN (KOR) / cellulase (OR16pep), identical to endo-1,4-beta-D-glucanase KORRIGAN (Arabidopsis thaliana) GI:3978258; similar to endo-1,4-beta-D-glucanase; cellulase GI:5689613 from (Brassica napus); identical to cDNA cellulase (OR16pep) GI:1022806 | 1                     | 0                              | 1                  | 0                                 | 1                    | 0                     |
| AT5G49810 | MMT__methionine S-methyltransferase, identical to methionine S-methyltransferase (Arabidopsis thaliana) GI:5733429                                                                                                                                                                                             | 1                     | 0                              | 0                  | 0                                 | 1                    | 0                     |
| AT5G50370 | adenylate kinase, putative, similar to adenylate kinase (ATP-AMP transphosphorylase) (Arabidopsis thaliana) SWISS-PROT:O82514                                                                                                                                                                                  | 1                     | 0                              | 1                  | 1                                 | 1                    | 1                     |

**Supplementary Tables pertaining to Figure 2**

**Supplementary Table S8. Proteins of the root cellular proteome that are in the AraCyc Plant Metabolic Network**

| Locus     | Annotation                                                                                                                                                                                                                                                                                                                                              | Root Hairs (COBL9) | Non-Hair Epidermis (WER) | Cortex (CORTEX) | Endodermis/ Quiescent (SCR) | Vasculature (WOL) | Columella (PET111) |
|-----------|---------------------------------------------------------------------------------------------------------------------------------------------------------------------------------------------------------------------------------------------------------------------------------------------------------------------------------------------------------|--------------------|--------------------------|-----------------|-----------------------------|-------------------|--------------------|
| AT5G50850 | pyruvate dehydrogenase E1 component beta subunit, mitochondrial / PDHE1-B (PDH2), identical to SP:Q38799 Pyruvate dehydrogenase E1 component beta subunit, mitochondrial precursor (EC 1.2.4.1) (PDHE1-B) { <i>Arabidopsis thaliana</i> }                                                                                                               | 1                  | 1                        | 1               | 1                           | 1                 | 1                  |
| AT5G51820 | PGM_ATPGMP_PGM1_STF1__phosphoglucomutase, chloroplast (PGM) (PGMP) / glucose phosphomutase, identical to SP:Q9SCY0 Phosphoglucomutase, chloroplast precursor (EC 5.4.2.2) (Glucose phosphomutase) (PGM) { <i>Arabidopsis thaliana</i> }                                                                                                                 | 0                  | 0                        | 0               | 0                           | 1                 | 0                  |
| AT5G52840 | NADH-ubiquinone oxidoreductase-related, contains weak similarity to NADH-ubiquinone oxidoreductase 13 kDa-B subunit (EC 1.6.5.3) (EC 1.6.99.3) (Complex I-13Kd-B) (CI-13Kd-B) (Complex I subunit B13) (Swiss-Prot:Q63362) ( <i>Rattus norvegicus</i> )                                                                                                  | 1                  | 1                        | 1               | 1                           | 1                 | 1                  |
| AT5G52920 | pyruvate kinase, putative, similar to pyruvate kinase isozyme G, chloroplast precursor ( <i>Nicotiana tabacum</i> ) SWISS-PROT:Q40546                                                                                                                                                                                                                   | 1                  | 1                        | 1               | 1                           | 1                 | 0                  |
| AT5G53460 | GLT1__glutamate synthase (NADH), chloroplast, putative, similar to SP:Q03460 Glutamate synthase (NADH), chloroplast precursor (EC 1.4.1.14) (NADH- GOGAT) { <i>Medicago sativa</i> }                                                                                                                                                                    | 1                  | 1                        | 1               | 1                           | 1                 | 1                  |
| AT5G54810 | TSB1_TRP2_TRPB__tryptophan synthase, beta subunit 1 (TSB1), identical to SP:P14671                                                                                                                                                                                                                                                                      | 0                  | 1                        | 0               | 0                           | 0                 | 0                  |
| AT5G55070 | 2-oxoacid dehydrogenase family protein, similar to SP:Q01205 Dihydrolipoamide succinyltransferase component of 2-oxoglutarate dehydrogenase complex, mitochondrial precursor (EC 2.3.1.61) { <i>Rattus norvegicus</i> }; contains Pfam profiles PF00198: 2-oxo acid dehydrogenases acyltransferase (catalytic domain), PF00364: Biotin-requiring enzyme | 1                  | 1                        | 1               | 1                           | 1                 | 1                  |

**Supplementary Tables pertaining to Figure 2**

**Supplementary Table S8. Proteins of the root cellular proteome that are in the AraCyc Plant Metabolic Network**

| Locus     | Annotation                                                                                                                                                                                                                                                                                                                                                                      | Root Hairs (COBL9) | Non-Hair Epidermis (WER) | Cortex (CORTEX) | Endodermis/Quiescent (SCR) | Vasculature (WOL) | Columella (PET111) |
|-----------|---------------------------------------------------------------------------------------------------------------------------------------------------------------------------------------------------------------------------------------------------------------------------------------------------------------------------------------------------------------------------------|--------------------|--------------------------|-----------------|----------------------------|-------------------|--------------------|
| AT5G56350 | pyruvate kinase, putative, similar to pyruvate kinase, cytosolic isozyme ( <i>Nicotiana tabacum</i> ) SWISS-PROT:Q42954                                                                                                                                                                                                                                                         | 1                  | 0                        | 0               | 0                          | 0                 | 0                  |
| AT5G56680 | EMB2755__asparaginyl-tRNA synthetase 1, cytoplasmic / asparagine-tRNA ligase 1 (SYNC1), identical to SP:Q9SW96                                                                                                                                                                                                                                                                  | 0                  | 0                        | 0               | 0                          | 1                 | 0                  |
| AT5G57655 | xylose isomerase family protein, contains similarity to Xylose isomerase (EC 5.3.1.5) (Swiss-Prot:P22842) ( <i>Thermoanaerobacter ethanolicus</i> )                                                                                                                                                                                                                             | 1                  | 1                        | 1               | 0                          | 0                 | 1                  |
| AT5G59290 | UXS3_ATUXS3__UDP-glucuronic acid decarboxylase (UXS3), identical to UDP-glucuronic acid decarboxylase ( <i>Arabidopsis thaliana</i> ) GI:14595666; contains Pfam profile PF01370 NAD dependent epimerase/dehydratase family; identical to cDNA UDP-glucuronic acid decarboxylase (UXS3) GI:14595665                                                                             | 0                  | 1                        | 0               | 0                          | 0                 | 1                  |
| AT5G61580 | phosphofructokinase family protein, similar to phosphofructokinase ( <i>Amycolatopsis methanolica</i> ) GI:17432243; contains Pfam profile PF00365: Phosphofructokinase                                                                                                                                                                                                         | 1                  | 0                        | 0               | 0                          | 0                 | 0                  |
| AT5G63310 | NDPK2_NDPK1A_NDPK IA_NDPK IA IA__nucleotide diphosphate kinase II, chloroplast (NDPK2), identical to SP:O64903 Nucleoside diphosphate kinase II, chloroplast precursor (NDK II) (NDP kinase II) (NDPK II) (NDPK Ia) ( <i>Arabidopsis thaliana</i> ); contains Pfam PF00334 : Nucleoside diphosphate kinase domain; contains Pfam profile PF00334: Nucleoside diphosphate kinase | 0                  | 0                        | 1               | 0                          | 0                 | 0                  |
| AT5G63400 | ADK1__adenylate kinase, identical to adenylate kinase (ATP-AMP transphosphorylase) ( <i>Arabidopsis thaliana</i> ) SWISS-PROT:O82514                                                                                                                                                                                                                                            | 1                  | 1                        | 1               | 1                          | 1                 | 1                  |

**Supplementary Tables pertaining to Figure 2**

**Supplementary Table S8. Proteins of the root cellular proteome that are in the AraCyc Plant Metabolic Network**

| Locus     | Annotation                                                                                                                                                                                                                                                                                                                                                                                                                                                                                                              | Root Hairs (COBL9) | Non-Hair Epidermis (WER) | Cortex (CORTEX) | Endodermis/ Quiescent (SCR) | Vasculature (WOL) | Columella (PET111) |
|-----------|-------------------------------------------------------------------------------------------------------------------------------------------------------------------------------------------------------------------------------------------------------------------------------------------------------------------------------------------------------------------------------------------------------------------------------------------------------------------------------------------------------------------------|--------------------|--------------------------|-----------------|-----------------------------|-------------------|--------------------|
| AT5G63510 | bacterial transferase hexapeptide repeat-containing protein, contains similarity to acetyltransferase; contains Pfam profile PF00132: Bacterial transferase hexapeptide (four repeats)                                                                                                                                                                                                                                                                                                                                  | 1                  | 1                        | 0               | 0                           | 1                 | 0                  |
| AT5G63570 | GSA1__glutamate-1-semialdehyde 2,1-aminomutase 1 (GSA 1) / glutamate-1-semialdehyde aminotransferase 1 (GSA-AT 1), identical to GSA 1 (SP:P42799)                                                                                                                                                                                                                                                                                                                                                                       | 1                  | 1                        | 0               | 1                           | 1                 | 0                  |
| AT5G63890 | ATHDH__histidinol dehydrogenase, putative / HDH, putative, strong similarity to SP:P24226 Histidinol dehydrogenase, chloroplast precursor (EC 1.1.1.23) (HDH) {Brassica oleracea var.capitata}; contains Pfam profile PF00815: histidinol dehydrogenase                                                                                                                                                                                                                                                                 | 1                  | 0                        | 1               | 1                           | 1                 | 0                  |
| AT5G64050 | ATERS_ERS__glutamate-tRNA ligase family protein / glutamyl-tRNA synthetase family protein, similar to SP:P22250 from Bacillus subtilis, SP:P22249 from Bacillus stearothermophilus; contains Pfam tRNA synthetases class I (E and Q), catalytic domain PF00749                                                                                                                                                                                                                                                          | 1                  | 1                        | 0               | 0                           | 0                 | 0                  |
| AT5G64300 | ATGCH__similar to riboflavin biosynthesis protein, putative [Arabidopsis thaliana] (TAIR:At2g22450.1); similar to GTP cyclohydrolase II / 3,4-dihydroxy-2-butanone-4-phosphate synthase [Lycopersicon esculentum] (GB:CAA05308.1); similar to putative riboflavin biosynthesis protein ribA [Oryza sativa (japonica cultivar-group)] (GB:XP_483002.1); contains InterPro domain GTP cyclohydrolase II (InterPro:IPR000926); contains InterPro domain 3,4-Dihydroxy-2-butanone 4-phosphate synthase (InterPro:IPR000422) | 1                  | 1                        | 0               | 0                           | 0                 | 0                  |



## Supplementary Tables pertaining to Figure 2

### Supplementary Table S8. Proteins of the root cellular proteome that are in the AraCyc Plant Metabolic Network

| Locus     | Annotation                                                                                                                                                                                                                                                                                                                     | Root Hairs (COBL9) | Non-Hair Epidermis (WER) | Cortex (CORTEX) | Endodermis/ Quiescent (SCR) | Vasculature (WOL) | Columella (PET111) |
|-----------|--------------------------------------------------------------------------------------------------------------------------------------------------------------------------------------------------------------------------------------------------------------------------------------------------------------------------------|--------------------|--------------------------|-----------------|-----------------------------|-------------------|--------------------|
| AT5G64740 | CESA6_E112_IXR2_PRC1__cellulose synthase, catalytic subunit, putative, similar to gi:2827141 cellulose synthase catalytic subunit (Ath-A), <i>Arabidopsis thaliana</i>                                                                                                                                                         | 1                  | 0                        | 0               | 0                           | 1                 | 0                  |
| AT5G64860 | DPE1__4-alpha-glucanotransferase, putative / disproportionating enzyme, putative, similar to 4-alpha-glucanotransferase SP:Q06801 from ( <i>Solanum tuberosum</i> )                                                                                                                                                            | 1                  | 0                        | 0               | 0                           | 0                 | 1                  |
| AT5G65110 | ACX2_ATACX2__acyl-CoA oxidase (ACX2), identical to acyl-CoA oxidase ( <i>Arabidopsis thaliana</i> ) GI:3044212                                                                                                                                                                                                                 | 1                  | 1                        | 0               | 0                           | 0                 | 1                  |
| AT5G65720 | cysteine desulfurase, mitochondrial (NIFS), identical to Cysteine desulfurase, mitochondrial precursor (SP:O49543) { <i>Arabidopsis thaliana</i> }; identical to cDNA GI:12656131; contains Pfam profile PF00266: aminotransferase, class V                                                                                    | 1                  | 1                        | 0               | 0                           | 1                 | 0                  |
| AT5G65780 | branched-chain amino acid aminotransferase 5 / branched-chain amino acid transaminase 5 (BCAT5), nearly identical to SP:Q9FYA6 Branched-chain amino acid aminotransferase 5, chloroplast precursor (EC 2.6.1.42) ( <i>Atbcat-5</i> ) { <i>Arabidopsis thaliana</i> }; contains Pfam profile: PF01063 aminotransferase class IV | 1                  | 1                        | 0               | 0                           | 1                 | 0                  |
| AT5G65940 | CHY1__3-hydroxyisobutyryl-coenzyme A hydrolase / CoA-thioester hydrolase (CHY1), identical to gi:8572760; contains Pfam profile PF00388 enoyl-CoA hydratase/isomerase family protein                                                                                                                                           | 1                  | 0                        | 0               | 0                           | 1                 | 1                  |
| AT5G66120 | 3-dehydroquinate synthase, putative, similar to aroB ( <i>Neisseria gonorrhoeae</i> )(GI:2661441); contains 3-dehydroquinate synthase domain PF01761                                                                                                                                                                           | 1                  | 0                        | 1               | 1                           | 1                 | 0                  |
| AT5G66280 | GMD1__GDP-D-mannose 4,6-dehydratase, putative, strong similarity to GDP-D-mannose-4,6-dehydratase ( <i>Arabidopsis thaliana</i> ) GI:1764100                                                                                                                                                                                   | 0                  | 0                        | 0               | 0                           | 0                 | 1                  |

**Supplementary Tables pertaining to Figure 2**

**Supplementary Table S8. Proteins of the root cellular proteome that are in the AraCyc Plant Metabolic Network**

| Locus     | Annotation                                                                                                                                                                                                                                                                                                              | Root Hairs (COBL9) | Non-Hair Epidermis (WER) | Cortex (CORTEX) | Endodermis/ Quiescent (SCR) | Vasculature (WOL) | Columella (PET111) |
|-----------|-------------------------------------------------------------------------------------------------------------------------------------------------------------------------------------------------------------------------------------------------------------------------------------------------------------------------|--------------------|--------------------------|-----------------|-----------------------------|-------------------|--------------------|
| AT5G66510 | bacterial transferase hexapeptide repeat-containing protein, contains Pfam profile PF00132: Bacterial transferase hexapeptide (four repeats)                                                                                                                                                                            | 1                  | 1                        | 1               | 1                           | 1                 | 1                  |
| AT5G66760 | SDH1-1__succinate dehydrogenase (ubiquinone) flavoprotein subunit, mitochondrial / flavoprotein subunit of complex II, identical to SP:O82663 Succinate dehydrogenase (ubiquinone) flavoprotein subunit, mitochondrial (EC 1.3.5.1) (FP) (Flavoprotein subunit of complex II) { <i>Arabidopsis thaliana</i> }           | 1                  | 1                        | 1               | 1                           | 1                 | 1                  |
| AT5G67590 | FRO1__NADH-ubiquinone oxidoreductase-related, contains weak similarity to NADH-ubiquinone oxidoreductase 21 kDa subunit, mitochondrial precursor (EC 1.6.5.3) (EC 1.6.99.3) (Complex I-21KD) (CI-21KD). (Swiss-Prot:P25711) ( <i>Neurospora crassa</i> ); contains Pfam PF04800: ETC complex I subunit conserved region | 1                  | 0                        | 1               | 1                           | 1                 | 1                  |
| ATCG00490 | RBCL__large subunit of RUBISCO.                                                                                                                                                                                                                                                                                         | 0                  | 0                        | 1               | 0                           | 0                 | 0                  |
| ATCG00500 | ACCD__ACCD__carboxytransferase beta subunit                                                                                                                                                                                                                                                                             | 1                  | 1                        | 1               | 1                           | 1                 | 0                  |

**Supplementary Tables pertaining to Figure 2**

**Supplementary Table S9. Proteins of the root cellular proteome that are also found in The Arabidopsis Information Resource (TAIR) and BioGRID databases**

**Proteins of the Root Cellular Proteome found in TAIR and BioGRID databases**

| Locus     | Root Hairs (COBL9) | Non-Hair Epidermis (WER) | Cortex (CORTEX) | Endodermis/ Quiescent (SCR) | Vasculature (WOL) | Columella (PET111) |
|-----------|--------------------|--------------------------|-----------------|-----------------------------|-------------------|--------------------|
| AT1G01040 | 0                  | 0                        | 0               | 0                           | 1                 | 0                  |
| AT1G01090 | 1                  | 1                        | 1               | 1                           | 1                 | 1                  |
| AT1G04170 | 1                  | 0                        | 0               | 0                           | 1                 | 0                  |
| AT1G04410 | 1                  | 1                        | 1               | 1                           | 1                 | 1                  |
| AT1G04690 | 0                  | 0                        | 0               | 0                           | 1                 | 0                  |
| AT1G04850 | 0                  | 0                        | 0               | 0                           | 1                 | 0                  |
| AT1G05260 | 0                  | 0                        | 0               | 1                           | 0                 | 0                  |
| AT1G06220 | 1                  | 0                        | 0               | 0                           | 1                 | 0                  |
| AT1G06950 | 1                  | 1                        | 1               | 1                           | 1                 | 1                  |
| AT1G07890 | 1                  | 0                        | 1               | 0                           | 1                 | 1                  |
| AT1G10270 | 1                  | 0                        | 0               | 0                           | 1                 | 0                  |
| AT1G10290 | 1                  | 0                        | 0               | 1                           | 1                 | 1                  |
| AT1G10840 | 0                  | 0                        | 0               | 1                           | 1                 | 0                  |
| AT1G11910 | 1                  | 1                        | 1               | 1                           | 1                 | 1                  |
| AT1G12840 | 1                  | 1                        | 1               | 1                           | 1                 | 1                  |
| AT1G13440 | 0                  | 0                        | 0               | 0                           | 1                 | 1                  |
| AT1G14320 | 0                  | 0                        | 0               | 1                           | 0                 | 0                  |
| AT1G15750 | 0                  | 0                        | 0               | 0                           | 1                 | 0                  |
| AT1G16890 | 0                  | 0                        | 0               | 0                           | 1                 | 0                  |
| AT1G19920 | 0                  | 0                        | 0               | 0                           | 1                 | 0                  |
| AT1G20090 | 0                  | 0                        | 0               | 0                           | 1                 | 0                  |
| AT1G20200 | 1                  | 0                        | 0               | 0                           | 1                 | 0                  |
| AT1G20450 | 0                  | 0                        | 0               | 0                           | 0                 | 1                  |
| AT1G20620 | 0                  | 0                        | 1               | 0                           | 0                 | 0                  |
| AT1G20630 | 0                  | 0                        | 0               | 0                           | 0                 | 1                  |
| AT1G20950 | 0                  | 0                        | 0               | 0                           | 1                 | 0                  |
| AT1G20960 | 1                  | 0                        | 0               | 0                           | 1                 | 1                  |
| AT1G21560 | 1                  | 0                        | 0               | 0                           | 0                 | 0                  |
| AT1G21750 | 1                  | 1                        | 1               | 1                           | 1                 | 1                  |
| AT1G22300 | 1                  | 1                        | 1               | 1                           | 1                 | 1                  |
| AT1G22450 | 1                  | 1                        | 1               | 0                           | 1                 | 0                  |
| AT1G22840 | 1                  | 0                        | 1               | 0                           | 1                 | 1                  |

**Supplementary Tables pertaining to Figure 2**

**Supplementary Table S9. Proteins of the root cellular proteome that are also found in The Arabidopsis Information Resource (TAIR) and BioGRID databases**

**Proteins of the Root Cellular Proteome found in TAIR and BioGRID databases**

| Locus     | Root Hairs (COBL9) | Non-Hair Epidermis (WER) | Cortex (CORTEX) | Endodermis/ Quiescent (SCR) | Vasculature (WOL) | Columella (PET111) |
|-----------|--------------------|--------------------------|-----------------|-----------------------------|-------------------|--------------------|
| AT1G23190 | 1                  | 0                        | 0               | 0                           | 1                 | 1                  |
| AT1G23820 | 1                  | 0                        | 1               | 1                           | 1                 | 0                  |
| AT1G25490 | 1                  | 0                        | 0               | 0                           | 1                 | 0                  |
| AT1G27310 | 0                  | 0                        | 0               | 0                           | 1                 | 0                  |
| AT1G27390 | 1                  | 0                        | 0               | 0                           | 1                 | 0                  |
| AT1G27450 | 1                  | 0                        | 0               | 0                           | 0                 | 1                  |
| AT1G27970 | 0                  | 0                        | 0               | 0                           | 1                 | 0                  |
| AT1G29150 | 1                  | 0                        | 0               | 1                           | 1                 | 0                  |
| AT1G30400 | 1                  | 1                        | 0               | 0                           | 1                 | 1                  |
| AT1G31180 | 1                  | 1                        | 1               | 0                           | 1                 | 1                  |
| AT1G31817 | 1                  | 1                        | 1               | 0                           | 1                 | 0                  |
| AT1G32400 | 0                  | 0                        | 0               | 1                           | 0                 | 0                  |
| AT1G35160 | 1                  | 0                        | 1               | 1                           | 1                 | 0                  |
| AT1G35580 | 0                  | 0                        | 0               | 0                           | 1                 | 1                  |
| AT1G47128 | 0                  | 0                        | 1               | 0                           | 0                 | 0                  |
| AT1G47260 | 1                  | 1                        | 1               | 1                           | 1                 | 1                  |
| AT1G48030 | 1                  | 1                        | 1               | 1                           | 1                 | 1                  |
| AT1G50030 | 0                  | 0                        | 0               | 0                           | 1                 | 0                  |
| AT1G50940 | 0                  | 1                        | 0               | 0                           | 0                 | 0                  |
| AT1G51650 | 0                  | 0                        | 0               | 0                           | 0                 | 1                  |
| AT1G51710 | 0                  | 0                        | 0               | 0                           | 1                 | 0                  |
| AT1G51980 | 1                  | 1                        | 1               | 1                           | 1                 | 1                  |
| AT1G52070 | 1                  | 1                        | 0               | 0                           | 1                 | 1                  |
| AT1G52740 | 0                  | 0                        | 0               | 0                           | 1                 | 0                  |
| AT1G54010 | 1                  | 1                        | 1               | 0                           | 1                 | 1                  |
| AT1G54030 | 1                  | 1                        | 1               | 0                           | 1                 | 1                  |
| AT1G55490 | 1                  | 0                        | 0               | 1                           | 1                 | 0                  |
| AT1G56340 | 1                  | 1                        | 1               | 1                           | 1                 | 1                  |
| AT1G59820 | 1                  | 0                        | 0               | 0                           | 1                 | 0                  |
| AT1G62020 | 1                  | 0                        | 1               | 1                           | 1                 | 1                  |
| AT1G64520 | 1                  | 0                        | 0               | 0                           | 1                 | 0                  |
| AT1G65930 | 1                  | 0                        | 1               | 1                           | 1                 | 1                  |

**Supplementary Tables pertaining to Figure 2**

**Supplementary Table S9. Proteins of the root cellular proteome that are also found in The Arabidopsis Information Resource (TAIR) and BioGRID databases**

**Proteins of the Root Cellular Proteome found in TAIR and BioGRID databases**

| Locus     | Root Hairs (COBL9) | Non-Hair Epidermis (WER) | Cortex (CORTEX) | Endodermis/ Quiescent (SCR) | Vasculature (WOL) | Columella (PET111) |
|-----------|--------------------|--------------------------|-----------------|-----------------------------|-------------------|--------------------|
| AT1G70310 | 1                  | 0                        | 0               | 1                           | 0                 | 0                  |
| AT1G72150 | 0                  | 0                        | 0               | 0                           | 1                 | 0                  |
| AT1G73590 | 0                  | 0                        | 0               | 0                           | 1                 | 0                  |
| AT1G75990 | 0                  | 0                        | 0               | 0                           | 1                 | 0                  |
| AT1G76030 | 0                  | 0                        | 0               | 0                           | 0                 | 1                  |
| AT1G78300 | 1                  | 1                        | 1               | 1                           | 1                 | 0                  |
| AT1G78570 | 0                  | 0                        | 1               | 0                           | 1                 | 0                  |
| AT1G78900 | 1                  | 1                        | 1               | 1                           | 1                 | 1                  |
| AT1G79530 | 1                  | 1                        | 1               | 1                           | 1                 | 1                  |
| AT1G79690 | 1                  | 1                        | 1               | 0                           | 1                 | 0                  |
| AT1G80670 | 1                  | 0                        | 0               | 0                           | 0                 | 0                  |
| AT2G01250 | 1                  | 0                        | 1               | 1                           | 1                 | 1                  |
| AT2G01470 | 1                  | 1                        | 1               | 0                           | 1                 | 1                  |
| AT2G02050 | 1                  | 0                        | 1               | 0                           | 1                 | 1                  |
| AT2G04030 | 1                  | 1                        | 1               | 1                           | 1                 | 0                  |
| AT2G04400 | 1                  | 1                        | 0               | 1                           | 0                 | 1                  |
| AT2G06050 | 1                  | 1                        | 1               | 0                           | 1                 | 1                  |
| AT2G13560 | 1                  | 0                        | 0               | 0                           | 1                 | 0                  |
| AT2G15620 | 1                  | 0                        | 1               | 0                           | 1                 | 1                  |
| AT2G16640 | 0                  | 0                        | 0               | 0                           | 1                 | 0                  |
| AT2G17790 | 0                  | 0                        | 0               | 0                           | 1                 | 0                  |
| AT2G18960 | 1                  | 1                        | 1               | 1                           | 1                 | 1                  |
| AT2G19080 | 1                  | 0                        | 0               | 1                           | 1                 | 1                  |
| AT2G19520 | 0                  | 0                        | 0               | 0                           | 1                 | 0                  |
| AT2G19940 | 1                  | 1                        | 1               | 0                           | 1                 | 1                  |
| AT2G20370 | 1                  | 0                        | 0               | 0                           | 1                 | 0                  |
| AT2G20580 | 1                  | 0                        | 1               | 1                           | 1                 | 0                  |
| AT2G20890 | 0                  | 0                        | 0               | 0                           | 1                 | 0                  |
| AT2G21170 | 1                  | 1                        | 1               | 1                           | 1                 | 1                  |
| AT2G21390 | 1                  | 0                        | 0               | 1                           | 1                 | 1                  |
| AT2G21620 | 0                  | 0                        | 0               | 0                           | 1                 | 0                  |
| AT2G21660 | 1                  | 1                        | 1               | 1                           | 1                 | 1                  |

**Supplementary Tables pertaining to Figure 2**

**Supplementary Table S9. Proteins of the root cellular proteome that are also found in The Arabidopsis Information Resource (TAIR) and BioGRID databases**

**Proteins of the Root Cellular Proteome found in TAIR and BioGRID databases**

| Locus     | Root Hairs (COBL9) | Non-Hair Epidermis (WER) | Cortex (CORTEX) | Endodermis/ Quiescent (SCR) | Vasculature (WOL) | Columella (PET111) |
|-----------|--------------------|--------------------------|-----------------|-----------------------------|-------------------|--------------------|
| AT2G22780 | 1                  | 1                        | 1               | 1                           | 1                 | 1                  |
| AT2G26640 | 1                  | 0                        | 1               | 0                           | 0                 | 0                  |
| AT2G26730 | 0                  | 0                        | 0               | 0                           | 1                 | 0                  |
| AT2G27040 | 0                  | 0                        | 0               | 0                           | 1                 | 0                  |
| AT2G28000 | 1                  | 1                        | 1               | 1                           | 1                 | 1                  |
| AT2G28900 | 0                  | 0                        | 0               | 0                           | 0                 | 1                  |
| AT2G29960 | 1                  | 0                        | 1               | 0                           | 1                 | 1                  |
| AT2G30490 | 1                  | 1                        | 1               | 1                           | 1                 | 1                  |
| AT2G30870 | 1                  | 1                        | 1               | 1                           | 1                 | 0                  |
| AT2G30950 | 0                  | 0                        | 0               | 0                           | 0                 | 1                  |
| AT2G34480 | 1                  | 0                        | 1               | 1                           | 1                 | 1                  |
| AT2G34660 | 1                  | 0                        | 1               | 1                           | 1                 | 1                  |
| AT2G35720 | 1                  | 0                        | 1               | 0                           | 1                 | 0                  |
| AT2G36910 | 0                  | 0                        | 0               | 0                           | 1                 | 0                  |
| AT2G38230 | 0                  | 0                        | 0               | 0                           | 0                 | 1                  |
| AT2G38280 | 1                  | 0                        | 0               | 1                           | 0                 | 0                  |
| AT2G39630 | 1                  | 0                        | 0               | 0                           | 0                 | 1                  |
| AT2G42590 | 1                  | 0                        | 0               | 0                           | 1                 | 0                  |
| AT2G42810 | 0                  | 0                        | 0               | 0                           | 1                 | 0                  |
| AT2G43350 | 0                  | 1                        | 0               | 0                           | 0                 | 0                  |
| AT2G43750 | 1                  | 1                        | 1               | 1                           | 1                 | 1                  |
| AT2G44610 | 1                  | 0                        | 1               | 0                           | 1                 | 0                  |
| AT2G45140 | 1                  | 0                        | 0               | 0                           | 1                 | 0                  |
| AT2G45820 | 0                  | 0                        | 0               | 0                           | 1                 | 0                  |
| AT2G45960 | 1                  | 1                        | 1               | 1                           | 1                 | 1                  |
| AT2G46280 | 1                  | 0                        | 0               | 1                           | 1                 | 0                  |
| AT2G47730 | 1                  | 1                        | 0               | 1                           | 1                 | 1                  |
| AT3G01280 | 1                  | 1                        | 1               | 1                           | 1                 | 1                  |
| AT3G01290 | 1                  | 0                        | 0               | 0                           | 0                 | 0                  |
| AT3G02090 | 1                  | 1                        | 1               | 1                           | 1                 | 1                  |
| AT3G02230 | 1                  | 1                        | 1               | 1                           | 1                 | 1                  |
| AT3G02520 | 1                  | 0                        | 1               | 1                           | 1                 | 1                  |

**Supplementary Tables pertaining to Figure 2**

**Supplementary Table S9. Proteins of the root cellular proteome that are also found in The Arabidopsis Information Resource (TAIR) and BioGRID databases**

**Proteins of the Root Cellular Proteome found in TAIR and BioGRID databases**

| Locus     | Root Hairs<br>(COBL9) | Non-Hair<br>Epidermis<br>(WER) | Cortex<br>(CORTEX) | Endodermis/<br>Quiescent<br>(SCR) | Vasculature<br>(WOL) | Columella<br>(PET111) |
|-----------|-----------------------|--------------------------------|--------------------|-----------------------------------|----------------------|-----------------------|
| AT3G02880 | 1                     | 0                              | 1                  | 0                                 | 1                    | 0                     |
| AT3G03600 | 1                     | 0                              | 0                  | 1                                 | 1                    | 1                     |
| AT3G04940 | 0                     | 0                              | 0                  | 0                                 | 1                    | 0                     |
| AT3G05420 | 1                     | 0                              | 0                  | 0                                 | 0                    | 0                     |
| AT3G08530 | 1                     | 0                              | 1                  | 0                                 | 1                    | 1                     |
| AT3G09260 | 1                     | 1                              | 1                  | 1                                 | 1                    | 1                     |
| AT3G09440 | 1                     | 0                              | 1                  | 1                                 | 1                    | 0                     |
| AT3G09840 | 1                     | 1                              | 0                  | 1                                 | 1                    | 0                     |
| AT3G10380 | 0                     | 0                              | 0                  | 0                                 | 1                    | 0                     |
| AT3G10730 | 0                     | 0                              | 1                  | 0                                 | 0                    | 0                     |
| AT3G11070 | 1                     | 0                              | 1                  | 0                                 | 1                    | 1                     |
| AT3G11130 | 1                     | 1                              | 1                  | 1                                 | 1                    | 1                     |
| AT3G11730 | 1                     | 0                              | 0                  | 0                                 | 0                    | 0                     |
| AT3G13110 | 0                     | 1                              | 0                  | 0                                 | 0                    | 0                     |
| AT3G13300 | 0                     | 0                              | 0                  | 0                                 | 1                    | 0                     |
| AT3G13460 | 1                     | 0                              | 0                  | 0                                 | 0                    | 0                     |
| AT3G13580 | 1                     | 0                              | 0                  | 1                                 | 0                    | 0                     |
| AT3G13920 | 1                     | 0                              | 1                  | 1                                 | 1                    | 1                     |
| AT3G14220 | 1                     | 1                              | 0                  | 0                                 | 0                    | 1                     |
| AT3G15000 | 1                     | 0                              | 1                  | 0                                 | 1                    | 1                     |
| AT3G15730 | 1                     | 0                              | 1                  | 1                                 | 1                    | 1                     |
| AT3G15980 | 1                     | 0                              | 1                  | 0                                 | 1                    | 0                     |
| AT3G16420 | 1                     | 1                              | 1                  | 0                                 | 1                    | 1                     |
| AT3G16480 | 1                     | 1                              | 1                  | 1                                 | 1                    | 1                     |
| AT3G16640 | 1                     | 0                              | 1                  | 1                                 | 1                    | 1                     |
| AT3G17240 | 1                     | 1                              | 1                  | 1                                 | 1                    | 1                     |
| AT3G17970 | 1                     | 1                              | 0                  | 1                                 | 0                    | 0                     |
| AT3G19390 | 1                     | 0                              | 0                  | 0                                 | 1                    | 0                     |
| AT3G20000 | 1                     | 1                              | 1                  | 1                                 | 1                    | 1                     |
| AT3G20050 | 1                     | 0                              | 0                  | 1                                 | 1                    | 0                     |
| AT3G21160 | 0                     | 1                              | 0                  | 0                                 | 0                    | 0                     |
| AT3G22320 | 1                     | 0                              | 0                  | 0                                 | 1                    | 0                     |

**Supplementary Tables pertaining to Figure 2**

**Supplementary Table S9. Proteins of the root cellular proteome that are also found in The Arabidopsis Information Resource (TAIR) and BioGRID databases**

**Proteins of the Root Cellular Proteome found in TAIR and BioGRID databases**

| Locus     | Root Hairs<br>(COBL9) | Non-Hair<br>Epidermis<br>(WER) | Cortex<br>(CORTEX) | Endodermis/<br>Quiescent<br>(SCR) | Vasculature<br>(WOL) | Columella<br>(PET111) |
|-----------|-----------------------|--------------------------------|--------------------|-----------------------------------|----------------------|-----------------------|
| AT3G23820 | 1                     | 1                              | 1                  | 0                                 | 1                    | 0                     |
| AT3G24830 | 1                     | 1                              | 0                  | 1                                 | 1                    | 0                     |
| AT3G25230 | 0                     | 0                              | 1                  | 1                                 | 1                    | 0                     |
| AT3G27080 | 1                     | 0                              | 0                  | 0                                 | 1                    | 0                     |
| AT3G28860 | 0                     | 0                              | 1                  | 1                                 | 1                    | 0                     |
| AT3G32980 | 0                     | 0                              | 0                  | 1                                 | 0                    | 0                     |
| AT3G44110 | 0                     | 0                              | 0                  | 0                                 | 1                    | 0                     |
| AT3G48680 | 1                     | 0                              | 1                  | 0                                 | 0                    | 1                     |
| AT3G49080 | 1                     | 0                              | 0                  | 0                                 | 1                    | 0                     |
| AT3G49240 | 0                     | 1                              | 0                  | 0                                 | 1                    | 0                     |
| AT3G51160 | 1                     | 0                              | 0                  | 0                                 | 0                    | 1                     |
| AT3G51240 | 0                     | 0                              | 0                  | 1                                 | 0                    | 0                     |
| AT3G51260 | 1                     | 1                              | 1                  | 1                                 | 1                    | 1                     |
| AT3G52180 | 0                     | 0                              | 0                  | 0                                 | 0                    | 1                     |
| AT3G52300 | 1                     | 1                              | 1                  | 0                                 | 1                    | 1                     |
| AT3G52850 | 0                     | 0                              | 1                  | 0                                 | 0                    | 0                     |
| AT3G52930 | 1                     | 1                              | 1                  | 1                                 | 1                    | 1                     |
| AT3G52960 | 1                     | 1                              | 1                  | 1                                 | 1                    | 0                     |
| AT3G53420 | 0                     | 0                              | 1                  | 1                                 | 0                    | 1                     |
| AT3G53430 | 0                     | 1                              | 0                  | 0                                 | 0                    | 0                     |
| AT3G54660 | 1                     | 0                              | 1                  | 0                                 | 0                    | 0                     |
| AT3G54840 | 1                     | 0                              | 0                  | 0                                 | 0                    | 0                     |
| AT3G56070 | 1                     | 1                              | 1                  | 1                                 | 1                    | 1                     |
| AT3G56150 | 1                     | 1                              | 1                  | 1                                 | 1                    | 0                     |
| AT3G56460 | 1                     | 1                              | 0                  | 0                                 | 1                    | 1                     |
| AT3G57290 | 1                     | 0                              | 0                  | 0                                 | 1                    | 0                     |
| AT3G57560 | 1                     | 0                              | 0                  | 0                                 | 0                    | 0                     |
| AT3G59760 | 1                     | 1                              | 1                  | 1                                 | 1                    | 1                     |
| AT3G59920 | 1                     | 0                              | 1                  | 1                                 | 1                    | 0                     |
| AT3G60600 | 1                     | 0                              | 0                  | 0                                 | 1                    | 0                     |
| AT3G60750 | 1                     | 1                              | 1                  | 1                                 | 1                    | 1                     |
| AT3G62030 | 1                     | 1                              | 0                  | 1                                 | 0                    | 1                     |



**Supplementary Tables pertaining to Figure 2**

**Supplementary Table S9. Proteins of the root cellular proteome that are also found in The Arabidopsis Information Resource (TAIR) and BioGRID databases**

**Proteins of the Root Cellular Proteome found in TAIR and BioGRID databases**

| Locus     | Root Hairs<br>(COBL9) | Non-Hair<br>Epidermis<br>(WER) | Cortex<br>(CORTEX) | Endodermis/<br>Quiescent<br>(SCR) | Vasculature<br>(WOL) | Columella<br>(PET111) |
|-----------|-----------------------|--------------------------------|--------------------|-----------------------------------|----------------------|-----------------------|
| AT3G62830 | 1                     | 1                              | 1                  | 1                                 | 1                    | 1                     |
| AT3G63130 | 0                     | 0                              | 0                  | 0                                 | 1                    | 0                     |
| AT4G00570 | 1                     | 1                              | 1                  | 0                                 | 1                    | 1                     |
| AT4G01900 | 1                     | 0                              | 1                  | 0                                 | 1                    | 0                     |
| AT4G02510 | 1                     | 1                              | 1                  | 1                                 | 0                    | 0                     |
| AT4G03190 | 0                     | 0                              | 0                  | 0                                 | 1                    | 0                     |
| AT4G03560 | 1                     | 0                              | 1                  | 1                                 | 1                    | 1                     |
| AT4G05420 | 0                     | 0                              | 0                  | 1                                 | 1                    | 0                     |
| AT4G09000 | 1                     | 1                              | 1                  | 1                                 | 1                    | 1                     |
| AT4G09320 | 1                     | 1                              | 1                  | 1                                 | 1                    | 1                     |
| AT4G11420 | 0                     | 0                              | 0                  | 1                                 | 1                    | 0                     |
| AT4G11850 | 0                     | 0                              | 0                  | 0                                 | 1                    | 0                     |
| AT4G14880 | 1                     | 1                              | 1                  | 0                                 | 1                    | 1                     |
| AT4G16143 | 0                     | 0                              | 0                  | 1                                 | 1                    | 0                     |
| AT4G16760 | 1                     | 1                              | 1                  | 1                                 | 1                    | 0                     |
| AT4G17170 | 1                     | 0                              | 0                  | 0                                 | 1                    | 1                     |
| AT4G18830 | 0                     | 0                              | 0                  | 0                                 | 1                    | 0                     |
| AT4G19640 | 0                     | 0                              | 0                  | 0                                 | 0                    | 1                     |
| AT4G20850 | 1                     | 1                              | 1                  | 1                                 | 1                    | 1                     |
| AT4G20890 | 0                     | 1                              | 0                  | 0                                 | 0                    | 0                     |
| AT4G21105 | 0                     | 0                              | 0                  | 1                                 | 0                    | 0                     |
| AT4G23430 | 0                     | 1                              | 0                  | 0                                 | 0                    | 0                     |
| AT4G23630 | 0                     | 0                              | 0                  | 0                                 | 0                    | 1                     |
| AT4G23650 | 0                     | 0                              | 0                  | 0                                 | 1                    | 0                     |
| AT4G25630 | 1                     | 0                              | 0                  | 1                                 | 1                    | 0                     |
| AT4G26570 | 1                     | 0                              | 0                  | 0                                 | 0                    | 1                     |
| AT4G26610 | 0                     | 0                              | 0                  | 1                                 | 0                    | 0                     |
| AT4G27090 | 1                     | 0                              | 0                  | 1                                 | 1                    | 1                     |
| AT4G27160 | 0                     | 0                              | 0                  | 0                                 | 1                    | 0                     |
| AT4G27500 | 1                     | 0                              | 0                  | 0                                 | 1                    | 0                     |
| AT4G29130 | 1                     | 1                              | 1                  | 1                                 | 1                    | 1                     |
| AT4G29350 | 1                     | 0                              | 1                  | 0                                 | 1                    | 0                     |

**Supplementary Tables pertaining to Figure 2**

**Supplementary Table S9. Proteins of the root cellular proteome that are also found in The Arabidopsis Information Resource (TAIR) and BioGRID databases**

**Proteins of the Root Cellular Proteome found in TAIR and BioGRID databases**

| Locus     | Root Hairs (COBL9) | Non-Hair Epidermis (WER) | Cortex (CORTEX) | Endodermis/ Quiescent (SCR) | Vasculature (WOL) | Columella (PET111) |
|-----------|--------------------|--------------------------|-----------------|-----------------------------|-------------------|--------------------|
| AT4G30190 | 1                  | 1                        | 1               | 0                           | 1                 | 1                  |
| AT4G31480 | 0                  | 0                        | 0               | 1                           | 0                 | 0                  |
| AT4G31500 | 0                  | 1                        | 0               | 0                           | 1                 | 1                  |
| AT4G32410 | 1                  | 1                        | 1               | 1                           | 1                 | 0                  |
| AT4G32470 | 1                  | 1                        | 1               | 0                           | 1                 | 1                  |
| AT4G32880 | 1                  | 0                        | 0               | 0                           | 0                 | 0                  |
| AT4G33650 | 0                  | 0                        | 0               | 0                           | 1                 | 0                  |
| AT4G34450 | 1                  | 1                        | 1               | 1                           | 1                 | 1                  |
| AT4G34670 | 0                  | 0                        | 0               | 1                           | 1                 | 0                  |
| AT4G35000 | 1                  | 1                        | 1               | 1                           | 1                 | 1                  |
| AT4G35090 | 1                  | 1                        | 1               | 1                           | 1                 | 1                  |
| AT4G36250 | 1                  | 1                        | 0               | 0                           | 0                 | 0                  |
| AT4G37870 | 0                  | 1                        | 0               | 0                           | 1                 | 1                  |
| AT4G38510 | 1                  | 1                        | 1               | 0                           | 1                 | 1                  |
| AT4G38800 | 0                  | 0                        | 0               | 1                           | 1                 | 0                  |
| AT4G39260 | 1                  | 0                        | 0               | 1                           | 1                 | 1                  |
| AT5G02500 | 1                  | 1                        | 1               | 1                           | 1                 | 1                  |
| AT5G04830 | 0                  | 0                        | 1               | 0                           | 0                 | 1                  |
| AT5G04990 | 1                  | 1                        | 0               | 0                           | 0                 | 0                  |
| AT5G05000 | 1                  | 0                        | 1               | 1                           | 1                 | 0                  |
| AT5G05170 | 1                  | 1                        | 1               | 1                           | 1                 | 0                  |
| AT5G06060 | 0                  | 0                        | 0               | 0                           | 1                 | 0                  |
| AT5G09420 | 0                  | 0                        | 0               | 0                           | 1                 | 0                  |
| AT5G10450 | 1                  | 0                        | 0               | 1                           | 1                 | 0                  |
| AT5G11670 | 1                  | 0                        | 0               | 0                           | 1                 | 1                  |
| AT5G13120 | 1                  | 0                        | 0               | 1                           | 1                 | 0                  |
| AT5G13930 | 0                  | 0                        | 1               | 0                           | 1                 | 0                  |
| AT5G15650 | 1                  | 1                        | 1               | 1                           | 1                 | 1                  |
| AT5G16050 | 1                  | 0                        | 1               | 1                           | 1                 | 0                  |
| AT5G16620 | 1                  | 0                        | 0               | 0                           | 1                 | 0                  |
| AT5G17190 | 0                  | 1                        | 0               | 0                           | 0                 | 1                  |
| AT5G18520 | 0                  | 0                        | 1               | 0                           | 1                 | 1                  |

**Supplementary Tables pertaining to Figure 2**

**Supplementary Table S9. Proteins of the root cellular proteome that are also found in The Arabidopsis Information Resource (TAIR) and BioGRID databases**

**Proteins of the Root Cellular Proteome found in TAIR and BioGRID databases**

| Locus     | Root Hairs (COBL9) | Non-Hair Epidermis (WER) | Cortex (CORTEX) | Endodermis/ Quiescent (SCR) | Vasculature (WOL) | Columella (PET111) |
|-----------|--------------------|--------------------------|-----------------|-----------------------------|-------------------|--------------------|
| AT5G20290 | 1                  | 1                        | 0               | 1                           | 1                 | 0                  |
| AT5G22880 | 1                  | 0                        | 1               | 0                           | 1                 | 1                  |
| AT5G23540 | 1                  | 0                        | 0               | 0                           | 1                 | 0                  |
| AT5G26830 | 1                  | 0                        | 0               | 1                           | 1                 | 0                  |
| AT5G27600 | 0                  | 1                        | 1               | 0                           | 0                 | 0                  |
| AT5G27640 | 0                  | 0                        | 0               | 0                           | 1                 | 0                  |
| AT5G27850 | 1                  | 0                        | 1               | 1                           | 1                 | 1                  |
| AT5G35630 | 1                  | 1                        | 1               | 1                           | 1                 | 1                  |
| AT5G38480 | 1                  | 1                        | 0               | 1                           | 1                 | 1                  |
| AT5G38530 | 1                  | 1                        | 1               | 0                           | 0                 | 0                  |
| AT5G40810 | 1                  | 1                        | 1               | 1                           | 1                 | 1                  |
| AT5G40930 | 1                  | 0                        | 0               | 0                           | 1                 | 0                  |
| AT5G41600 | 1                  | 1                        | 1               | 0                           | 0                 | 1                  |
| AT5G41670 | 1                  | 1                        | 1               | 1                           | 1                 | 1                  |
| AT5G42020 | 1                  | 1                        | 1               | 1                           | 1                 | 1                  |
| AT5G42080 | 1                  | 1                        | 1               | 1                           | 1                 | 1                  |
| AT5G42650 | 1                  | 1                        | 0               | 0                           | 0                 | 0                  |
| AT5G42980 | 1                  | 1                        | 1               | 0                           | 1                 | 1                  |
| AT5G43060 | 1                  | 1                        | 1               | 1                           | 1                 | 1                  |
| AT5G43430 | 1                  | 0                        | 0               | 0                           | 0                 | 0                  |
| AT5G45390 | 0                  | 1                        | 0               | 0                           | 0                 | 0                  |
| AT5G46430 | 0                  | 0                        | 0               | 0                           | 1                 | 0                  |
| AT5G48810 | 1                  | 1                        | 1               | 0                           | 1                 | 1                  |
| AT5G50920 | 1                  | 1                        | 1               | 0                           | 1                 | 1                  |
| AT5G53560 | 1                  | 1                        | 1               | 1                           | 1                 | 1                  |
| AT5G56030 | 1                  | 0                        | 0               | 1                           | 1                 | 0                  |
| AT5G59880 | 1                  | 0                        | 1               | 0                           | 0                 | 1                  |
| AT5G62190 | 0                  | 0                        | 0               | 0                           | 1                 | 0                  |
| AT5G62740 | 0                  | 0                        | 0               | 0                           | 0                 | 1                  |
| AT5G63310 | 0                  | 0                        | 1               | 0                           | 0                 | 0                  |
| AT5G63510 | 1                  | 1                        | 0               | 0                           | 1                 | 0                  |
| AT5G63570 | 1                  | 1                        | 0               | 1                           | 1                 | 0                  |

**Supplementary Tables pertaining to Figure 2**

**Supplementary Table S9. Proteins of the root cellular proteome that are also found in The Arabidopsis Information Resource (TAIR) and BioGRID databases**

**Proteins of the Root Cellular Proteome found in TAIR and BioGRID databases**

| Locus     | Root Hairs (COBL9) | Non-Hair Epidermis (WER) | Cortex (CORTEX) | Endodermis/ Quiescent (SCR) | Vasculature (WOL) | Columella (PET111) |
|-----------|--------------------|--------------------------|-----------------|-----------------------------|-------------------|--------------------|
| AT5G64350 | 0                  | 0                        | 0               | 0                           | 0                 | 1                  |
| AT5G64740 | 1                  | 0                        | 0               | 0                           | 1                 | 0                  |
| AT5G65430 | 1                  | 0                        | 0               | 1                           | 1                 | 0                  |
| AT5G65720 | 1                  | 1                        | 0               | 0                           | 1                 | 0                  |
| AT5G66530 | 1                  | 0                        | 1               | 0                           | 0                 | 0                  |
| At1g01040 | 0                  | 0                        | 0               | 0                           | 1                 | 0                  |
| At1g01090 | 1                  | 1                        | 1               | 1                           | 1                 | 1                  |
| At1g01820 | 1                  | 0                        | 0               | 0                           | 1                 | 1                  |
| At1g03860 | 1                  | 1                        | 1               | 1                           | 1                 | 1                  |
| At1g04410 | 1                  | 1                        | 1               | 1                           | 1                 | 1                  |
| At1g04690 | 0                  | 0                        | 0               | 0                           | 1                 | 0                  |
| At1g04810 | 1                  | 0                        | 0               | 0                           | 0                 | 0                  |
| At1g04850 | 0                  | 0                        | 0               | 0                           | 1                 | 0                  |
| At1g06220 | 1                  | 0                        | 0               | 0                           | 1                 | 0                  |
| At1g06950 | 1                  | 1                        | 1               | 1                           | 1                 | 1                  |
| At1g07890 | 1                  | 0                        | 1               | 0                           | 1                 | 1                  |
| At1g08830 | 1                  | 0                        | 1               | 0                           | 1                 | 1                  |
| At1g09270 | 1                  | 0                        | 0               | 0                           | 1                 | 0                  |
| At1g09760 | 1                  | 0                        | 0               | 0                           | 1                 | 0                  |
| At1g10270 | 1                  | 0                        | 0               | 0                           | 1                 | 0                  |
| At1g10290 | 1                  | 0                        | 0               | 1                           | 1                 | 1                  |
| At1g10840 | 0                  | 0                        | 0               | 1                           | 1                 | 0                  |
| At1g11860 | 1                  | 1                        | 1               | 1                           | 1                 | 1                  |
| At1g11910 | 1                  | 1                        | 1               | 1                           | 1                 | 1                  |
| At1g13440 | 0                  | 0                        | 0               | 0                           | 1                 | 1                  |
| At1g14320 | 0                  | 0                        | 0               | 1                           | 0                 | 0                  |
| At1g14620 | 1                  | 0                        | 0               | 0                           | 1                 | 0                  |
| At1g14810 | 1                  | 1                        | 1               | 1                           | 1                 | 1                  |
| At1g14850 | 1                  | 0                        | 0               | 0                           | 1                 | 0                  |
| At1g15750 | 0                  | 0                        | 0               | 0                           | 1                 | 0                  |
| At1g16890 | 0                  | 0                        | 0               | 0                           | 1                 | 0                  |
| At1g18540 | 1                  | 0                        | 1               | 1                           | 1                 | 0                  |

**Supplementary Tables pertaining to Figure 2**

**Supplementary Table S9. Proteins of the root cellular proteome that are also found in The Arabidopsis Information Resource (TAIR) and BioGRID databases**

**Proteins of the Root Cellular Proteome found in TAIR and BioGRID databases**

| Locus     | Root Hairs (COBL9) | Non-Hair Epidermis (WER) | Cortex (CORTEX) | Endodermis/ Quiescent (SCR) | Vasculature (WOL) | Columella (PET111) |
|-----------|--------------------|--------------------------|-----------------|-----------------------------|-------------------|--------------------|
| At1g19520 | 1                  | 1                        | 0               | 0                           | 1                 | 0                  |
| At1g20090 | 0                  | 0                        | 0               | 0                           | 1                 | 0                  |
| At1g20200 | 1                  | 0                        | 0               | 0                           | 1                 | 0                  |
| At1g20450 | 0                  | 0                        | 0               | 0                           | 0                 | 1                  |
| At1g20620 | 0                  | 0                        | 1               | 0                           | 0                 | 0                  |
| At1g20630 | 0                  | 0                        | 0               | 0                           | 0                 | 1                  |
| At1g20960 | 1                  | 0                        | 0               | 0                           | 1                 | 1                  |
| At1g21750 | 1                  | 1                        | 1               | 1                           | 1                 | 1                  |
| At1g22300 | 1                  | 1                        | 1               | 1                           | 1                 | 1                  |
| At1g22450 | 1                  | 1                        | 1               | 0                           | 1                 | 0                  |
| At1g23190 | 1                  | 0                        | 0               | 0                           | 1                 | 1                  |
| At1g23310 | 0                  | 0                        | 0               | 0                           | 0                 | 1                  |
| At1g23820 | 1                  | 0                        | 1               | 1                           | 1                 | 0                  |
| At1g24510 | 1                  | 0                        | 0               | 1                           | 1                 | 0                  |
| At1g25490 | 1                  | 0                        | 0               | 0                           | 1                 | 0                  |
| At1g26630 | 1                  | 0                        | 0               | 0                           | 1                 | 1                  |
| At1g27310 | 0                  | 0                        | 0               | 0                           | 1                 | 0                  |
| At1g27970 | 0                  | 0                        | 0               | 0                           | 1                 | 0                  |
| At1g29150 | 1                  | 0                        | 0               | 1                           | 1                 | 0                  |
| At1g30400 | 1                  | 1                        | 0               | 0                           | 1                 | 1                  |
| At1g32380 | 1                  | 1                        | 0               | 0                           | 0                 | 0                  |
| At1g32400 | 0                  | 0                        | 0               | 1                           | 0                 | 0                  |
| At1g35160 | 1                  | 0                        | 1               | 1                           | 1                 | 0                  |
| At1g35580 | 0                  | 0                        | 0               | 0                           | 1                 | 1                  |
| At1g35720 | 1                  | 1                        | 1               | 1                           | 1                 | 1                  |
| At1g43170 | 1                  | 0                        | 1               | 1                           | 1                 | 1                  |
| At1g47128 | 0                  | 0                        | 1               | 0                           | 0                 | 0                  |
| At1g47260 | 1                  | 1                        | 1               | 1                           | 1                 | 1                  |
| At1g48600 | 0                  | 0                        | 0               | 1                           | 0                 | 0                  |
| At1g48920 | 1                  | 1                        | 0               | 0                           | 1                 | 0                  |
| At1g49760 | 1                  | 0                        | 0               | 1                           | 1                 | 0                  |
| At1g50030 | 0                  | 0                        | 0               | 0                           | 1                 | 0                  |

**Supplementary Tables pertaining to Figure 2**

**Supplementary Table S9. Proteins of the root cellular proteome that are also found in The Arabidopsis Information Resource (TAIR) and BioGRID databases**

**Proteins of the Root Cellular Proteome found in TAIR and BioGRID databases**

| Locus     | Root Hairs (COBL9) | Non-Hair Epidermis (WER) | Cortex (CORTEX) | Endodermis/ Quiescent (SCR) | Vasculature (WOL) | Columella (PET111) |
|-----------|--------------------|--------------------------|-----------------|-----------------------------|-------------------|--------------------|
| At1g51650 | 0                  | 0                        | 0               | 0                           | 0                 | 1                  |
| At1g51710 | 0                  | 0                        | 0               | 0                           | 1                 | 0                  |
| At1g51980 | 1                  | 1                        | 1               | 1                           | 1                 | 1                  |
| At1g52070 | 1                  | 1                        | 0               | 0                           | 1                 | 1                  |
| At1g52360 | 1                  | 0                        | 1               | 0                           | 1                 | 0                  |
| At1g52740 | 0                  | 0                        | 0               | 0                           | 1                 | 0                  |
| At1g53310 | 1                  | 0                        | 0               | 1                           | 1                 | 0                  |
| At1g53750 | 0                  | 0                        | 0               | 1                           | 1                 | 0                  |
| At1g54030 | 1                  | 1                        | 1               | 0                           | 1                 | 1                  |
| At1g54270 | 0                  | 0                        | 0               | 0                           | 1                 | 1                  |
| At1g55490 | 1                  | 0                        | 0               | 1                           | 1                 | 0                  |
| At1g55890 | 1                  | 1                        | 1               | 0                           | 1                 | 0                  |
| At1g56070 | 1                  | 1                        | 1               | 1                           | 1                 | 1                  |
| At1g56110 | 1                  | 1                        | 0               | 1                           | 1                 | 0                  |
| At1g56340 | 1                  | 1                        | 1               | 1                           | 1                 | 1                  |
| At1g57720 | 1                  | 1                        | 1               | 1                           | 1                 | 1                  |
| At1g59610 | 1                  | 1                        | 1               | 1                           | 1                 | 1                  |
| At1g61870 | 1                  | 1                        | 0               | 0                           | 1                 | 0                  |
| At1g64090 | 1                  | 1                        | 1               | 1                           | 1                 | 1                  |
| At1g64520 | 1                  | 0                        | 0               | 0                           | 1                 | 0                  |
| At1g65020 | 0                  | 0                        | 0               | 0                           | 1                 | 0                  |
| At1g65260 | 0                  | 0                        | 0               | 0                           | 0                 | 1                  |
| At1g70310 | 1                  | 0                        | 0               | 1                           | 0                 | 0                  |
| At1g72150 | 0                  | 0                        | 0               | 0                           | 1                 | 0                  |
| At1g72730 | 0                  | 0                        | 1               | 0                           | 0                 | 0                  |
| At1g74030 | 1                  | 1                        | 0               | 1                           | 0                 | 1                  |
| At1g75990 | 0                  | 0                        | 0               | 0                           | 1                 | 0                  |
| At1g76010 | 1                  | 1                        | 0               | 0                           | 0                 | 0                  |
| At1g76030 | 0                  | 0                        | 0               | 0                           | 0                 | 1                  |
| At1g78300 | 1                  | 1                        | 1               | 1                           | 1                 | 0                  |
| At1g78380 | 1                  | 1                        | 0               | 1                           | 1                 | 1                  |
| At1g78900 | 1                  | 1                        | 1               | 1                           | 1                 | 1                  |

**Supplementary Tables pertaining to Figure 2**

**Supplementary Table S9. Proteins of the root cellular proteome that are also found in The Arabidopsis Information Resource (TAIR) and BioGRID databases**

**Proteins of the Root Cellular Proteome found in TAIR and BioGRID databases**

| Locus     | Root Hairs<br>(COBL9) | Non-Hair<br>Epidermis<br>(WER) | Cortex<br>(CORTEX) | Endodermis/<br>Quiescent<br>(SCR) | Vasculature<br>(WOL) | Columella<br>(PET111) |
|-----------|-----------------------|--------------------------------|--------------------|-----------------------------------|----------------------|-----------------------|
| At1g79530 | 1                     | 1                              | 1                  | 1                                 | 1                    | 1                     |
| At1g79690 | 1                     | 1                              | 1                  | 0                                 | 1                    | 0                     |
| At1g79930 | 0                     | 0                              | 0                  | 1                                 | 0                    | 1                     |
| At1g80070 | 1                     | 0                              | 0                  | 0                                 | 1                    | 0                     |
| At1g80480 | 0                     | 1                              | 0                  | 0                                 | 0                    | 0                     |
| At1g80670 | 1                     | 0                              | 0                  | 0                                 | 0                    | 0                     |
| At2g01250 | 1                     | 0                              | 1                  | 1                                 | 1                    | 1                     |
| At2g01470 | 1                     | 1                              | 1                  | 0                                 | 1                    | 1                     |
| At2g04030 | 1                     | 1                              | 1                  | 1                                 | 1                    | 0                     |
| At2g05710 | 1                     | 1                              | 1                  | 1                                 | 1                    | 1                     |
| At2g13560 | 1                     | 0                              | 0                  | 0                                 | 1                    | 0                     |
| At2g16570 | 1                     | 0                              | 0                  | 0                                 | 0                    | 0                     |
| At2g16600 | 1                     | 0                              | 0                  | 1                                 | 1                    | 1                     |
| At2g16640 | 0                     | 0                              | 0                  | 0                                 | 1                    | 0                     |
| At2g18960 | 1                     | 1                              | 1                  | 1                                 | 1                    | 1                     |
| At2g19520 | 0                     | 0                              | 0                  | 0                                 | 1                    | 0                     |
| At2g20370 | 1                     | 0                              | 0                  | 0                                 | 1                    | 0                     |
| At2g20530 | 1                     | 1                              | 1                  | 1                                 | 1                    | 1                     |
| At2g20580 | 1                     | 0                              | 1                  | 1                                 | 1                    | 0                     |
| At2g20890 | 0                     | 0                              | 0                  | 0                                 | 1                    | 0                     |
| At2g21390 | 1                     | 0                              | 0                  | 1                                 | 1                    | 1                     |
| At2g21660 | 1                     | 1                              | 1                  | 1                                 | 1                    | 1                     |
| At2g22780 | 1                     | 1                              | 1                  | 1                                 | 1                    | 1                     |
| At2g23350 | 1                     | 0                              | 0                  | 1                                 | 1                    | 0                     |
| At2g26640 | 1                     | 0                              | 1                  | 0                                 | 0                    | 0                     |
| At2g27040 | 0                     | 0                              | 0                  | 0                                 | 1                    | 0                     |
| At2g28000 | 1                     | 1                              | 1                  | 1                                 | 1                    | 1                     |
| At2g28900 | 0                     | 0                              | 0                  | 0                                 | 0                    | 1                     |
| At2g29080 | 1                     | 1                              | 1                  | 0                                 | 1                    | 1                     |
| At2g29960 | 1                     | 0                              | 1                  | 0                                 | 1                    | 1                     |
| At2g30050 | 1                     | 0                              | 0                  | 1                                 | 1                    | 0                     |
| At2g30490 | 1                     | 1                              | 1                  | 1                                 | 1                    | 1                     |

**Supplementary Tables pertaining to Figure 2**

**Supplementary Table S9. Proteins of the root cellular proteome that are also found in The Arabidopsis Information Resource (TAIR) and BioGRID databases**

**Proteins of the Root Cellular Proteome found in TAIR and BioGRID databases**

| Locus     | Root Hairs (COBL9) | Non-Hair Epidermis (WER) | Cortex (CORTEX) | Endodermis/ Quiescent (SCR) | Vasculature (WOL) | Columella (PET111) |
|-----------|--------------------|--------------------------|-----------------|-----------------------------|-------------------|--------------------|
| At2g30950 | 0                  | 0                        | 0               | 0                           | 0                 | 1                  |
| At2g32730 | 0                  | 0                        | 0               | 0                           | 1                 | 0                  |
| At2g33210 | 1                  | 1                        | 1               | 1                           | 1                 | 1                  |
| At2g33340 | 0                  | 0                        | 0               | 0                           | 1                 | 0                  |
| At2g34660 | 1                  | 0                        | 1               | 1                           | 1                 | 1                  |
| At2g35040 | 1                  | 1                        | 1               | 0                           | 1                 | 0                  |
| At2g36130 | 1                  | 0                        | 0               | 0                           | 1                 | 0                  |
| At2g36910 | 0                  | 0                        | 0               | 0                           | 1                 | 0                  |
| At2g37690 | 1                  | 1                        | 1               | 1                           | 1                 | 0                  |
| At2g38280 | 1                  | 0                        | 0               | 1                           | 0                 | 0                  |
| At2g38750 | 1                  | 1                        | 1               | 0                           | 1                 | 1                  |
| At2g39630 | 1                  | 0                        | 0               | 0                           | 0                 | 1                  |
| At2g39800 | 0                  | 0                        | 1               | 0                           | 0                 | 0                  |
| At2g41620 | 1                  | 0                        | 0               | 0                           | 1                 | 0                  |
| At2g42590 | 1                  | 0                        | 0               | 0                           | 1                 | 0                  |
| At2g43350 | 0                  | 1                        | 0               | 0                           | 0                 | 0                  |
| At2g43710 | 1                  | 1                        | 1               | 1                           | 1                 | 0                  |
| At2g43750 | 1                  | 1                        | 1               | 1                           | 1                 | 1                  |
| At2g44350 | 1                  | 1                        | 1               | 1                           | 1                 | 1                  |
| At2g44530 | 1                  | 0                        | 1               | 0                           | 0                 | 0                  |
| At2g45740 | 0                  | 0                        | 0               | 0                           | 0                 | 1                  |
| At2g45820 | 0                  | 0                        | 0               | 0                           | 1                 | 0                  |
| At2g45960 | 1                  | 1                        | 1               | 1                           | 1                 | 1                  |
| At2g46280 | 1                  | 0                        | 0               | 1                           | 1                 | 0                  |
| At2g47470 | 1                  | 1                        | 1               | 1                           | 1                 | 1                  |
| At3g01280 | 1                  | 1                        | 1               | 1                           | 1                 | 1                  |
| At3g01290 | 1                  | 0                        | 0               | 0                           | 0                 | 0                  |
| At3g02090 | 1                  | 1                        | 1               | 1                           | 1                 | 1                  |
| At3g02230 | 1                  | 1                        | 1               | 1                           | 1                 | 1                  |
| At3g02520 | 1                  | 0                        | 1               | 1                           | 1                 | 1                  |
| At3g02530 | 1                  | 0                        | 0               | 1                           | 1                 | 0                  |
| At3g03600 | 1                  | 0                        | 0               | 1                           | 1                 | 1                  |



**Supplementary Tables pertaining to Figure 2**

**Supplementary Table S9. Proteins of the root cellular proteome that are also found in The Arabidopsis Information Resource (TAIR) and BioGRID databases**

**Proteins of the Root Cellular Proteome found in TAIR and BioGRID databases**

| Locus     | Root Hairs<br>(COBL9) | Non-Hair<br>Epidermis<br>(WER) | Cortex<br>(CORTEX) | Endodermis/<br>Quiescent<br>(SCR) | Vasculature<br>(WOL) | Columella<br>(PET111) |
|-----------|-----------------------|--------------------------------|--------------------|-----------------------------------|----------------------|-----------------------|
| At3g03960 | 1                     | 0                              | 1                  | 1                                 | 1                    | 0                     |
| At3g04940 | 0                     | 0                              | 0                  | 0                                 | 1                    | 0                     |
| At3g05060 | 1                     | 0                              | 0                  | 1                                 | 1                    | 0                     |
| At3g05420 | 1                     | 0                              | 0                  | 0                                 | 0                    | 0                     |
| At3g07160 | 0                     | 0                              | 0                  | 0                                 | 1                    | 0                     |
| At3g08530 | 1                     | 0                              | 1                  | 0                                 | 1                    | 1                     |
| At3g08580 | 1                     | 1                              | 1                  | 1                                 | 1                    | 1                     |
| At3g09260 | 1                     | 1                              | 1                  | 1                                 | 1                    | 1                     |
| At3g09440 | 1                     | 0                              | 1                  | 1                                 | 1                    | 0                     |
| At3g09840 | 1                     | 1                              | 0                  | 1                                 | 1                    | 0                     |
| At3g10690 | 1                     | 1                              | 1                  | 0                                 | 1                    | 0                     |
| At3g10730 | 0                     | 0                              | 1                  | 0                                 | 0                    | 0                     |
| At3g11070 | 1                     | 0                              | 1                  | 0                                 | 1                    | 1                     |
| At3g11130 | 1                     | 1                              | 1                  | 1                                 | 1                    | 1                     |
| At3g11630 | 1                     | 1                              | 1                  | 0                                 | 1                    | 1                     |
| At3g11730 | 1                     | 0                              | 0                  | 0                                 | 0                    | 0                     |
| At3g11830 | 1                     | 0                              | 0                  | 1                                 | 1                    | 0                     |
| At3g12780 | 1                     | 1                              | 1                  | 1                                 | 1                    | 1                     |
| At3g13110 | 0                     | 1                              | 0                  | 0                                 | 0                    | 0                     |
| At3g13300 | 0                     | 0                              | 0                  | 0                                 | 1                    | 0                     |
| At3g13460 | 1                     | 0                              | 0                  | 0                                 | 0                    | 0                     |
| At3g13470 | 1                     | 1                              | 0                  | 1                                 | 1                    | 0                     |
| At3g13580 | 1                     | 0                              | 0                  | 1                                 | 0                    | 0                     |
| At3g13920 | 1                     | 0                              | 1                  | 1                                 | 1                    | 1                     |
| At3g14790 | 0                     | 1                              | 0                  | 0                                 | 0                    | 0                     |
| At3g14990 | 0                     | 0                              | 0                  | 1                                 | 0                    | 1                     |
| At3g15730 | 1                     | 0                              | 1                  | 1                                 | 1                    | 1                     |
| At3g15980 | 1                     | 0                              | 1                  | 0                                 | 1                    | 0                     |
| At3g16200 | 1                     | 0                              | 0                  | 0                                 | 0                    | 0                     |
| At3g16420 | 1                     | 1                              | 1                  | 0                                 | 1                    | 1                     |
| At3g16480 | 1                     | 1                              | 1                  | 1                                 | 1                    | 1                     |
| At3g17210 | 0                     | 0                              | 0                  | 0                                 | 1                    | 0                     |

**Supplementary Tables pertaining to Figure 2**

**Supplementary Table S9. Proteins of the root cellular proteome that are also found in The Arabidopsis Information Resource (TAIR) and BioGRID databases**

**Proteins of the Root Cellular Proteome found in TAIR and BioGRID databases**

| Locus     | Root Hairs<br>(COBL9) | Non-Hair<br>Epidermis<br>(WER) | Cortex<br>(CORTEX) | Endodermis/<br>Quiescent<br>(SCR) | Vasculature<br>(WOL) | Columella<br>(PET111) |
|-----------|-----------------------|--------------------------------|--------------------|-----------------------------------|----------------------|-----------------------|
| At3g17970 | 1                     | 1                              | 0                  | 1                                 | 0                    | 0                     |
| At3g18000 | 0                     | 0                              | 1                  | 0                                 | 0                    | 1                     |
| At3g18190 | 1                     | 0                              | 0                  | 1                                 | 1                    | 0                     |
| At3g19390 | 1                     | 0                              | 0                  | 0                                 | 1                    | 0                     |
| At3g19760 | 0                     | 0                              | 0                  | 1                                 | 0                    | 0                     |
| At3g20050 | 1                     | 0                              | 0                  | 1                                 | 1                    | 0                     |
| At3g20390 | 1                     | 0                              | 1                  | 0                                 | 1                    | 1                     |
| At3g21140 | 1                     | 1                              | 0                  | 1                                 | 1                    | 0                     |
| At3g21160 | 0                     | 1                              | 0                  | 0                                 | 0                    | 0                     |
| At3g22310 | 1                     | 1                              | 0                  | 0                                 | 1                    | 0                     |
| At3g22320 | 1                     | 0                              | 0                  | 0                                 | 1                    | 0                     |
| At3g23820 | 1                     | 1                              | 1                  | 0                                 | 1                    | 0                     |
| At3g23990 | 1                     | 1                              | 1                  | 1                                 | 1                    | 1                     |
| At3g25230 | 0                     | 0                              | 1                  | 1                                 | 1                    | 0                     |
| At3g28860 | 0                     | 0                              | 1                  | 1                                 | 1                    | 0                     |
| At3g29360 | 1                     | 0                              | 0                  | 0                                 | 0                    | 0                     |
| At3g44110 | 0                     | 0                              | 0                  | 0                                 | 1                    | 0                     |
| At3g47930 | 1                     | 1                              | 1                  | 0                                 | 1                    | 1                     |
| At3g48680 | 1                     | 0                              | 1                  | 0                                 | 0                    | 1                     |
| At3g49240 | 0                     | 1                              | 0                  | 0                                 | 1                    | 0                     |
| At3g51160 | 1                     | 0                              | 0                  | 0                                 | 0                    | 1                     |
| At3g51260 | 1                     | 1                              | 1                  | 1                                 | 1                    | 1                     |
| At3g51550 | 0                     | 0                              | 1                  | 0                                 | 0                    | 0                     |
| At3g52180 | 0                     | 0                              | 0                  | 0                                 | 0                    | 1                     |
| At3g52850 | 0                     | 0                              | 1                  | 0                                 | 0                    | 0                     |
| At3g53230 | 0                     | 0                              | 0                  | 1                                 | 0                    | 0                     |
| At3g53430 | 0                     | 1                              | 0                  | 0                                 | 0                    | 0                     |
| At3g55010 | 1                     | 0                              | 0                  | 1                                 | 1                    | 1                     |
| At3g55440 | 1                     | 1                              | 1                  | 1                                 | 1                    | 1                     |
| At3g55610 | 0                     | 0                              | 1                  | 0                                 | 0                    | 0                     |
| At3g55760 | 0                     | 1                              | 0                  | 0                                 | 0                    | 0                     |
| At3g56150 | 1                     | 1                              | 1                  | 1                                 | 1                    | 0                     |

**Supplementary Tables pertaining to Figure 2**

**Supplementary Table S9. Proteins of the root cellular proteome that are also found in The Arabidopsis Information Resource (TAIR) and BioGRID databases**

**Proteins of the Root Cellular Proteome found in TAIR and BioGRID databases**

| Locus     | Root Hairs (COBL9) | Non-Hair Epidermis (WER) | Cortex (CORTEX) | Endodermis/ Quiescent (SCR) | Vasculature (WOL) | Columella (PET111) |
|-----------|--------------------|--------------------------|-----------------|-----------------------------|-------------------|--------------------|
| At3g56900 | 1                  | 0                        | 0               | 0                           | 0                 | 0                  |
| At3g57290 | 1                  | 0                        | 0               | 0                           | 1                 | 0                  |
| At3g57560 | 1                  | 0                        | 0               | 0                           | 0                 | 0                  |
| At3g59760 | 1                  | 1                        | 1               | 1                           | 1                 | 1                  |
| At3g60600 | 1                  | 0                        | 0               | 0                           | 1                 | 0                  |
| At3g60750 | 1                  | 1                        | 1               | 1                           | 1                 | 1                  |
| At3g61070 | 1                  | 1                        | 1               | 1                           | 1                 | 1                  |
| At3g62030 | 1                  | 1                        | 0               | 1                           | 0                 | 1                  |
| At3g62830 | 1                  | 1                        | 1               | 1                           | 1                 | 1                  |
| At3g63130 | 0                  | 0                        | 0               | 0                           | 1                 | 0                  |
| At3g63410 | 0                  | 1                        | 1               | 1                           | 1                 | 1                  |
| At4g00570 | 1                  | 1                        | 1               | 0                           | 1                 | 1                  |
| At4g01900 | 1                  | 0                        | 1               | 0                           | 1                 | 0                  |
| At4g02500 | 1                  | 1                        | 1               | 0                           | 1                 | 0                  |
| At4g02510 | 1                  | 1                        | 1               | 1                           | 0                 | 0                  |
| At4g03190 | 0                  | 0                        | 0               | 0                           | 1                 | 0                  |
| At4g05420 | 0                  | 0                        | 0               | 1                           | 1                 | 0                  |
| At4g09000 | 1                  | 1                        | 1               | 1                           | 1                 | 1                  |
| At4g09320 | 1                  | 1                        | 1               | 1                           | 1                 | 1                  |
| At4g11420 | 0                  | 0                        | 0               | 1                           | 1                 | 0                  |
| At4g13850 | 1                  | 0                        | 0               | 0                           | 1                 | 0                  |
| At4g14880 | 1                  | 1                        | 1               | 0                           | 1                 | 1                  |
| At4g16143 | 0                  | 0                        | 0               | 1                           | 1                 | 0                  |
| At4g16760 | 1                  | 1                        | 1               | 1                           | 1                 | 0                  |
| At4g18830 | 0                  | 0                        | 0               | 0                           | 1                 | 0                  |
| At4g19006 | 0                  | 0                        | 0               | 0                           | 1                 | 0                  |
| At4g19640 | 0                  | 0                        | 0               | 0                           | 0                 | 1                  |
| At4g20360 | 1                  | 1                        | 0               | 0                           | 0                 | 0                  |
| At4g20850 | 1                  | 1                        | 1               | 1                           | 1                 | 1                  |
| At4g20890 | 0                  | 1                        | 0               | 0                           | 0                 | 0                  |
| At4g23430 | 0                  | 1                        | 0               | 0                           | 0                 | 0                  |
| At4g23630 | 0                  | 0                        | 0               | 0                           | 0                 | 1                  |

**Supplementary Tables pertaining to Figure 2**

**Supplementary Table S9. Proteins of the root cellular proteome that are also found in The Arabidopsis Information Resource (TAIR) and BioGRID databases**

**Proteins of the Root Cellular Proteome found in TAIR and BioGRID databases**

| Locus     | Root Hairs (COBL9) | Non-Hair Epidermis (WER) | Cortex (CORTEX) | Endodermis/ Quiescent (SCR) | Vasculature (WOL) | Columella (PET111) |
|-----------|--------------------|--------------------------|-----------------|-----------------------------|-------------------|--------------------|
| At4g24190 | 1                  | 1                        | 1               | 1                           | 1                 | 1                  |
| At4g24280 | 1                  | 1                        | 1               | 1                           | 1                 | 0                  |
| At4g24820 | 1                  | 0                        | 1               | 1                           | 1                 | 0                  |
| At4g26570 | 1                  | 0                        | 0               | 0                           | 0                 | 1                  |
| At4g26610 | 0                  | 0                        | 0               | 1                           | 0                 | 0                  |
| At4g27160 | 0                  | 0                        | 0               | 0                           | 1                 | 0                  |
| At4g27500 | 1                  | 0                        | 0               | 0                           | 1                 | 0                  |
| At4g28510 | 1                  | 1                        | 1               | 1                           | 1                 | 1                  |
| At4g29130 | 1                  | 1                        | 1               | 1                           | 1                 | 1                  |
| At4g29350 | 1                  | 0                        | 1               | 0                           | 1                 | 0                  |
| At4g30190 | 1                  | 1                        | 1               | 0                           | 1                 | 1                  |
| At4g31480 | 0                  | 0                        | 0               | 1                           | 0                 | 0                  |
| At4g31500 | 0                  | 1                        | 0               | 0                           | 1                 | 1                  |
| At4g32410 | 1                  | 1                        | 1               | 1                           | 1                 | 0                  |
| At4g32470 | 1                  | 1                        | 1               | 0                           | 1                 | 1                  |
| At4g33650 | 0                  | 0                        | 0               | 0                           | 1                 | 0                  |
| At4g34450 | 1                  | 1                        | 1               | 1                           | 1                 | 1                  |
| At4g34670 | 0                  | 0                        | 0               | 1                           | 1                 | 0                  |
| At4g34870 | 1                  | 1                        | 1               | 1                           | 1                 | 1                  |
| At4g35000 | 1                  | 1                        | 1               | 1                           | 1                 | 1                  |
| At4g35090 | 1                  | 1                        | 1               | 1                           | 1                 | 1                  |
| At4g35830 | 1                  | 0                        | 1               | 1                           | 1                 | 1                  |
| At4g38740 | 1                  | 0                        | 1               | 1                           | 1                 | 1                  |
| At4g38800 | 0                  | 0                        | 0               | 1                           | 1                 | 0                  |
| At4g39260 | 1                  | 0                        | 0               | 1                           | 1                 | 1                  |
| At4g39690 | 1                  | 1                        | 1               | 0                           | 1                 | 0                  |
| At5g02500 | 1                  | 1                        | 1               | 1                           | 1                 | 1                  |
| At5g02530 | 0                  | 0                        | 0               | 0                           | 1                 | 0                  |
| At5g02870 | 1                  | 0                        | 0               | 0                           | 1                 | 0                  |
| At5g04830 | 0                  | 0                        | 1               | 0                           | 0                 | 1                  |
| At5g04990 | 1                  | 1                        | 0               | 0                           | 0                 | 0                  |
| At5g05000 | 1                  | 0                        | 1               | 1                           | 1                 | 0                  |

**Supplementary Tables pertaining to Figure 2**

**Supplementary Table S9. Proteins of the root cellular proteome that are also found in The Arabidopsis Information Resource (TAIR) and BioGRID databases**

**Proteins of the Root Cellular Proteome found in TAIR and BioGRID databases**

| Locus     | Root Hairs<br>(COBL9) | Non-Hair<br>Epidermis<br>(WER) | Cortex<br>(CORTEX) | Endodermis/<br>Quiescent<br>(SCR) | Vasculature<br>(WOL) | Columella<br>(PET111) |
|-----------|-----------------------|--------------------------------|--------------------|-----------------------------------|----------------------|-----------------------|
| At5g05170 | 1                     | 1                              | 1                  | 1                                 | 1                    | 0                     |
| At5g05780 | 1                     | 0                              | 0                  | 0                                 | 1                    | 0                     |
| At5g08670 | 0                     | 0                              | 0                  | 0                                 | 1                    | 0                     |
| At5g09900 | 1                     | 0                              | 0                  | 0                                 | 1                    | 0                     |
| At5g10450 | 1                     | 0                              | 0                  | 1                                 | 1                    | 0                     |
| At5g13110 | 0                     | 0                              | 0                  | 1                                 | 1                    | 0                     |
| At5g13120 | 1                     | 0                              | 0                  | 1                                 | 1                    | 0                     |
| At5g13420 | 1                     | 1                              | 1                  | 1                                 | 1                    | 1                     |
| At5g13490 | 1                     | 1                              | 1                  | 1                                 | 1                    | 1                     |
| At5g15650 | 1                     | 1                              | 1                  | 1                                 | 1                    | 1                     |
| At5g15980 | 1                     | 1                              | 1                  | 0                                 | 1                    | 0                     |
| At5g16050 | 1                     | 0                              | 1                  | 1                                 | 1                    | 0                     |
| At5g16620 | 1                     | 0                              | 0                  | 0                                 | 1                    | 0                     |
| At5g17770 | 1                     | 1                              | 1                  | 1                                 | 1                    | 1                     |
| At5g19440 | 1                     | 0                              | 1                  | 0                                 | 1                    | 0                     |
| At5g20290 | 1                     | 1                              | 0                  | 1                                 | 1                    | 0                     |
| At5g20890 | 0                     | 0                              | 0                  | 1                                 | 1                    | 0                     |
| At5g22330 | 1                     | 0                              | 0                  | 0                                 | 0                    | 0                     |
| At5g22650 | 1                     | 0                              | 0                  | 0                                 | 1                    | 0                     |
| At5g22880 | 1                     | 0                              | 1                  | 0                                 | 1                    | 1                     |
| At5g23540 | 1                     | 0                              | 0                  | 0                                 | 1                    | 0                     |
| At5g24690 | 0                     | 0                              | 0                  | 0                                 | 1                    | 0                     |
| At5g26360 | 0                     | 0                              | 0                  | 1                                 | 1                    | 0                     |
| At5g26710 | 1                     | 0                              | 0                  | 0                                 | 1                    | 0                     |
| At5g26830 | 1                     | 0                              | 0                  | 1                                 | 1                    | 0                     |
| At5g26860 | 1                     | 0                              | 1                  | 0                                 | 1                    | 0                     |
| At5g27120 | 1                     | 1                              | 0                  | 1                                 | 1                    | 0                     |
| At5g27600 | 0                     | 1                              | 1                  | 0                                 | 0                    | 0                     |
| At5g27640 | 0                     | 0                              | 0                  | 0                                 | 1                    | 0                     |
| At5g27850 | 1                     | 0                              | 1                  | 1                                 | 1                    | 1                     |
| At5g28540 | 1                     | 1                              | 1                  | 1                                 | 1                    | 1                     |
| At5g35630 | 1                     | 1                              | 1                  | 1                                 | 1                    | 1                     |

**Supplementary Tables pertaining to Figure 2**

**Supplementary Table S9. Proteins of the root cellular proteome that are also found in The Arabidopsis Information Resource (TAIR) and BioGRID databases**

**Proteins of the Root Cellular Proteome found in TAIR and BioGRID databases**

| Locus     | Root Hairs<br>(COBL9) | Non-Hair<br>Epidermis<br>(WER) | Cortex<br>(CORTEX) | Endodermis/<br>Quiescent<br>(SCR) | Vasculature<br>(WOL) | Columella<br>(PET111) |
|-----------|-----------------------|--------------------------------|--------------------|-----------------------------------|----------------------|-----------------------|
| At5g38480 | 1                     | 1                              | 0                  | 1                                 | 1                    | 1                     |
| At5g40480 | 1                     | 1                              | 1                  | 1                                 | 1                    | 1                     |
| At5g40770 | 1                     | 1                              | 1                  | 1                                 | 1                    | 1                     |
| At5g40810 | 1                     | 1                              | 1                  | 1                                 | 1                    | 1                     |
| At5g41600 | 1                     | 1                              | 1                  | 0                                 | 0                    | 1                     |
| At5g41670 | 1                     | 1                              | 1                  | 1                                 | 1                    | 1                     |
| At5g42020 | 1                     | 1                              | 1                  | 1                                 | 1                    | 1                     |
| At5g42080 | 1                     | 1                              | 1                  | 1                                 | 1                    | 1                     |
| At5g42650 | 1                     | 1                              | 0                  | 0                                 | 0                    | 0                     |
| At5g42740 | 0                     | 0                              | 0                  | 1                                 | 1                    | 0                     |
| At5g43060 | 1                     | 1                              | 1                  | 1                                 | 1                    | 1                     |
| At5g44120 | 0                     | 1                              | 0                  | 0                                 | 1                    | 0                     |
| At5g45390 | 0                     | 1                              | 0                  | 0                                 | 0                    | 0                     |
| At5g45620 | 1                     | 0                              | 0                  | 0                                 | 1                    | 0                     |
| At5g46430 | 0                     | 0                              | 0                  | 0                                 | 1                    | 0                     |
| At5g49910 | 0                     | 0                              | 0                  | 1                                 | 1                    | 0                     |
| At5g50920 | 1                     | 1                              | 1                  | 0                                 | 1                    | 1                     |
| At5g51200 | 1                     | 0                              | 0                  | 0                                 | 1                    | 0                     |
| At5g53480 | 1                     | 0                              | 1                  | 1                                 | 1                    | 0                     |
| At5g53560 | 1                     | 1                              | 1                  | 1                                 | 1                    | 1                     |
| At5g56030 | 1                     | 0                              | 0                  | 1                                 | 1                    | 0                     |
| At5g56500 | 1                     | 1                              | 1                  | 1                                 | 1                    | 1                     |
| At5g59880 | 1                     | 0                              | 1                  | 0                                 | 0                    | 1                     |
| At5g60960 | 1                     | 0                              | 0                  | 0                                 | 1                    | 0                     |
| At5g62270 | 1                     | 0                              | 0                  | 0                                 | 0                    | 0                     |
| At5g62390 | 1                     | 0                              | 0                  | 1                                 | 1                    | 1                     |
| At5g62740 | 0                     | 0                              | 0                  | 0                                 | 0                    | 1                     |
| At5g63310 | 0                     | 0                              | 1                  | 0                                 | 0                    | 0                     |
| At5g63510 | 1                     | 1                              | 0                  | 0                                 | 1                    | 0                     |
| At5g64350 | 0                     | 0                              | 0                  | 0                                 | 0                    | 1                     |
| At5g64740 | 1                     | 0                              | 0                  | 0                                 | 1                    | 0                     |
| At5g65430 | 1                     | 0                              | 0                  | 1                                 | 1                    | 0                     |

**Supplementary Tables pertaining to Figure 2**

**Supplementary Table S9. Proteins of the root cellular proteome that are also found in The Arabidopsis Information Resource (TAIR) and BioGRID databases**

**Proteins of the Root Cellular Proteome found in TAIR and BioGRID databases**

| Locus     | Root Hairs<br>(COBL9) | Non-Hair<br>Epidermis<br>(WER) | Cortex<br>(CORTEX) | Endodermis/<br>Quiescent<br>(SCR) | Vasculature<br>(WOL) | Columella<br>(PET111) |
|-----------|-----------------------|--------------------------------|--------------------|-----------------------------------|----------------------|-----------------------|
| At5g65700 | 0                     | 0                              | 0                  | 0                                 | 1                    | 0                     |

Supplementary Tables pertaining to Figure 2

Supplementary Table S9. Proteins of the root cellular proteome that are also found in The Arabidopsis Information Resource (TAIR) and BioGRID databases

Proteins of the Root Cellular Proteome found in TAIR and BioGRID databases

TAIR and BioGRID Interactors (No Neciprocal or Self-Interactions)

| Interactor A Locus | Interactor B Locus | A Root Hairs (COBL9) | A Non-Hair Epidermis (WER) | A Cortex (CORTEX) | A Endodermis/Quiescent (SCR) | A Vasculature (WOL) | A Columella (PET11) | B Root Hairs (COBL9) | B Non-Hair Epidermis (WER) | B Cortex (CORTEX) | B Endodermis/Quiescent (SCR) | B Vasculature (WOL) | B Columella (PET11) |
|--------------------|--------------------|----------------------|----------------------------|-------------------|------------------------------|---------------------|---------------------|----------------------|----------------------------|-------------------|------------------------------|---------------------|---------------------|
| AT5G42980          | AT1G04410          | 1                    | 1                          | 1                 | 0                            | 1                   | 1                   | 1                    | 1                          | 1                 | 1                            | 1                   | 1                   |
| AT2G16640          | AT1G06950          | 0                    | 0                          | 0                 | 0                            | 1                   | 0                   | 1                    | 1                          | 1                 | 1                            | 1                   | 1                   |
| AT4G02510          | AT1G06950          | 1                    | 1                          | 1                 | 1                            | 0                   | 0                   | 1                    | 1                          | 1                 | 1                            | 1                   | 1                   |
| AT5G42980          | AT1G07890          | 1                    | 1                          | 1                 | 0                            | 1                   | 1                   | 1                    | 0                          | 1                 | 0                            | 1                   | 1                   |
| AT3G14990          | AT1G08830          | 0                    | 0                          | 0                 | 1                            | 0                   | 1                   | 1                    | 0                          | 1                 | 0                            | 1                   | 1                   |
| AT3G56150          | AT1G10840          | 1                    | 1                          | 1                 | 1                            | 1                   | 0                   | 0                    | 0                          | 0                 | 1                            | 1                   | 0                   |
| AT4G11420          | AT1G10840          | 0                    | 0                          | 0                 | 1                            | 1                   | 0                   | 0                    | 0                          | 0                 | 1                            | 1                   | 0                   |
| AT2G41620          | AT1G13440          | 1                    | 0                          | 0                 | 0                            | 1                   | 0                   | 0                    | 0                          | 0                 | 0                            | 1                   | 1                   |
| AT2G41620          | AT1G14850          | 1                    | 0                          | 0                 | 0                            | 1                   | 0                   | 1                    | 0                          | 0                 | 0                            | 1                   | 0                   |
| AT2G20580          | AT1G20200          | 1                    | 0                          | 1                 | 1                            | 1                   | 0                   | 1                    | 0                          | 0                 | 0                            | 1                   | 0                   |
| AT2G41620          | AT1G20620          | 1                    | 0                          | 0                 | 0                            | 1                   | 0                   | 0                    | 0                          | 1                 | 0                            | 0                   | 0                   |
| AT4G09320          | AT1G20620          | 1                    | 1                          | 1                 | 1                            | 1                   | 1                   | 0                    | 0                          | 1                 | 0                            | 0                   | 0                   |
| AT4G09320          | AT1G20630          | 1                    | 1                          | 1                 | 1                            | 1                   | 1                   | 0                    | 0                          | 0                 | 0                            | 0                   | 1                   |
| AT1G06220          | AT1G20960          | 1                    | 0                          | 0                 | 0                            | 1                   | 0                   | 1                    | 0                          | 0                 | 0                            | 1                   | 1                   |
| AT5G42980          | AT1G21750          | 1                    | 1                          | 1                 | 0                            | 1                   | 1                   | 1                    | 1                          | 1                 | 1                            | 1                   | 1                   |
| AT1G73590          | AT1G25490          | 0                    | 0                          | 0                 | 0                            | 1                   | 0                   | 1                    | 0                          | 0                 | 0                            | 1                   | 0                   |
| AT2G20580          | AT1G29150          | 1                    | 0                          | 1                 | 1                            | 1                   | 0                   | 1                    | 0                          | 0                 | 1                            | 1                   | 0                   |
| AT4G30190          | AT1G35160          | 1                    | 1                          | 1                 | 0                            | 1                   | 1                   | 1                    | 0                          | 1                 | 1                            | 1                   | 0                   |
| AT1G21750          | AT1G47128          | 1                    | 1                          | 1                 | 1                            | 1                   | 1                   | 0                    | 0                          | 1                 | 0                            | 0                   | 0                   |
| AT2G41620          | AT1G48920          | 1                    | 0                          | 0                 | 0                            | 1                   | 0                   | 1                    | 1                          | 0                 | 0                            | 1                   | 0                   |
| AT2G20580          | AT1G51650          | 1                    | 0                          | 1                 | 1                            | 1                   | 0                   | 0                    | 0                          | 0                 | 0                            | 0                   | 1                   |
| AT2G20580          | AT1G53750          | 1                    | 0                          | 1                 | 1                            | 1                   | 0                   | 0                    | 0                          | 0                 | 1                            | 1                   | 0                   |
| AT4G23630          | AT1G64090          | 0                    | 0                          | 0                 | 0                            | 0                   | 1                   | 1                    | 1                          | 1                 | 1                            | 1                   | 1                   |
| AT2G20580          | AT1G64520          | 1                    | 0                          | 1                 | 1                            | 1                   | 0                   | 1                    | 0                          | 0                 | 0                            | 1                   | 0                   |
| AT5G42980          | AT1G65930          | 1                    | 1                          | 1                 | 0                            | 1                   | 1                   | 1                    | 0                          | 1                 | 1                            | 1                   | 1                   |
| AT1G23820          | AT1G70310          | 1                    | 0                          | 1                 | 1                            | 1                   | 0                   | 1                    | 0                          | 0                 | 1                            | 0                   | 0                   |



Supplementary Tables pertaining to Figure 2

Supplementary Table S9. Proteins of the root cellular proteome that are also found in The Arabidopsis Information Resource (TAIR) and BioGRID databases

Proteins of the Root Cellular Proteome found in TAIR and BioGRID databases

TAIR and BioGRID Interactors (No Neciprocal or Self-Interactions)

| Interactor A Locus | Interactor B Locus | A Root Hairs (COBL9) | A Non-Hair Epidermis (WER) | A Cortex (CORTEX) | A Endodermis/Quiescent (SCR) | A Vasculature (WOL) | A Columella (PET11) | B Root Hairs (COBL9) | B Non-Hair Epidermis (WER) | B Cortex (CORTEX) | B Endodermis/Quiescent (SCR) | B Vasculature (WOL) | B Columella (PET11) |
|--------------------|--------------------|----------------------|----------------------------|-------------------|------------------------------|---------------------|---------------------|----------------------|----------------------------|-------------------|------------------------------|---------------------|---------------------|
| AT2G36910          | AT1G73590          | 0                    | 0                          | 0                 | 0                            | 1                   | 0                   | 0                    | 0                          | 0                 | 0                            | 1                   | 0                   |
| AT2G38280          | AT2G01470          | 1                    | 0                          | 0                 | 1                            | 0                   | 0                   | 1                    | 1                          | 1                 | 0                            | 1                   | 1                   |
| AT5G42980          | AT2G15620          | 1                    | 1                          | 1                 | 0                            | 1                   | 1                   | 1                    | 0                          | 1                 | 0                            | 1                   | 1                   |
| AT5G05000          | AT2G16640          | 1                    | 0                          | 1                 | 1                            | 1                   | 0                   | 0                    | 0                          | 0                 | 0                            | 1                   | 0                   |
| AT5G42980          | AT2G21170          | 1                    | 1                          | 1                 | 0                            | 1                   | 1                   | 1                    | 1                          | 1                 | 1                            | 1                   | 1                   |
| AT4G01900          | AT2G21390          | 1                    | 0                          | 1                 | 0                            | 1                   | 0                   | 1                    | 0                          | 0                 | 1                            | 1                   | 1                   |
| AT2G20580          | AT2G32730          | 1                    | 0                          | 1                 | 1                            | 1                   | 0                   | 0                    | 0                          | 0                 | 0                            | 1                   | 0                   |
| AT1G35720          | AT2G38750          | 1                    | 1                          | 1                 | 1                            | 1                   | 1                   | 1                    | 1                          | 1                 | 0                            | 1                   | 1                   |
| AT5G42980          | AT2G47730          | 1                    | 1                          | 1                 | 0                            | 1                   | 1                   | 1                    | 1                          | 0                 | 1                            | 1                   | 1                   |
| AT2G38280          | AT3G09840          | 1                    | 0                          | 0                 | 1                            | 0                   | 0                   | 1                    | 1                          | 0                 | 1                            | 1                   | 0                   |
| AT5G04990          | AT3G10730          | 1                    | 1                          | 0                 | 0                            | 0                   | 0                   | 0                    | 0                          | 1                 | 0                            | 0                   | 0                   |
| AT2G41620          | AT3G12780          | 1                    | 0                          | 0                 | 0                            | 1                   | 0                   | 1                    | 1                          | 1                 | 1                            | 1                   | 1                   |
| AT3G53420          | AT3G15730          | 0                    | 0                          | 1                 | 1                            | 0                   | 1                   | 1                    | 0                          | 1                 | 1                            | 1                   | 1                   |
| AT4G01900          | AT3G15980          | 1                    | 0                          | 1                 | 0                            | 1                   | 0                   | 1                    | 0                          | 1                 | 0                            | 1                   | 0                   |
| AT3G09260          | AT3G16420          | 1                    | 1                          | 1                 | 1                            | 1                   | 1                   | 1                    | 1                          | 1                 | 0                            | 1                   | 1                   |
| AT1G21750          | AT3G19390          | 1                    | 1                          | 1                 | 1                            | 1                   | 1                   | 1                    | 0                          | 0                 | 0                            | 1                   | 0                   |
| AT1G27390          | AT3G20000          | 1                    | 0                          | 0                 | 0                            | 1                   | 0                   | 1                    | 1                          | 1                 | 1                            | 1                   | 1                   |
| AT2G19080          | AT3G20000          | 1                    | 0                          | 0                 | 1                            | 1                   | 1                   | 1                    | 1                          | 1                 | 1                            | 1                   | 1                   |
| AT5G09420          | AT3G20000          | 0                    | 0                          | 0                 | 0                            | 1                   | 0                   | 1                    | 1                          | 1                 | 1                            | 1                   | 1                   |
| AT3G20000          | AT3G27080          | 1                    | 1                          | 1                 | 1                            | 1                   | 1                   | 1                    | 0                          | 0                 | 0                            | 1                   | 0                   |
| AT1G73590          | AT3G28860          | 0                    | 0                          | 0                 | 0                            | 1                   | 0                   | 0                    | 0                          | 1                 | 1                            | 1                   | 0                   |
| AT1G47260          | AT3G48680          | 1                    | 1                          | 1                 | 1                            | 1                   | 1                   | 1                    | 0                          | 1                 | 0                            | 0                   | 1                   |
| AT1G20090          | AT3G51550          | 0                    | 0                          | 0                 | 0                            | 1                   | 0                   | 0                    | 0                          | 1                 | 0                            | 0                   | 0                   |
| AT5G42980          | AT3G52960          | 1                    | 1                          | 1                 | 0                            | 1                   | 1                   | 1                    | 1                          | 1                 | 1                            | 1                   | 0                   |
| AT1G27390          | AT3G54660          | 1                    | 0                          | 0                 | 0                            | 1                   | 0                   | 1                    | 0                          | 1                 | 0                            | 0                   | 0                   |
| AT2G19080          | AT3G54660          | 1                    | 0                          | 0                 | 1                            | 1                   | 1                   | 1                    | 0                          | 1                 | 0                            | 0                   | 0                   |

Supplementary Tables pertaining to Figure 2

Supplementary Table S9. Proteins of the root cellular proteome that are also found in The Arabidopsis Information Resource (TAIR) and BioGRID databases

Proteins of the Root Cellular Proteome found in TAIR and BioGRID databases

TAIR and BioGRID Interactors (No Neciprocal or Self-Interactions)

| Interactor A Locus | Interactor B Locus | A Root Hairs (COBL9) | A Non-Hair Epidermis (WER) | A Cortex (CORTEX) | A Endodermis/Quiescent (SCR) | A Vasculature (WOL) | A Columella (PET11) | B Root Hairs (COBL9) | B Non-Hair Epidermis (WER) | B Cortex (CORTEX) | B Endodermis/Quiescent (SCR) | B Vasculature (WOL) | B Columella (PET11) |
|--------------------|--------------------|----------------------|----------------------------|-------------------|------------------------------|---------------------|---------------------|----------------------|----------------------------|-------------------|------------------------------|---------------------|---------------------|
| AT3G27080          | AT3G54660          | 1                    | 0                          | 0                 | 0                            | 1                   | 0                   | 1                    | 0                          | 1                 | 0                            | 0                   | 0                   |
| AT5G09420          | AT3G54660          | 0                    | 0                          | 0                 | 0                            | 1                   | 0                   | 1                    | 0                          | 1                 | 0                            | 0                   | 0                   |
| AT5G40930          | AT3G54660          | 1                    | 0                          | 0                 | 0                            | 1                   | 0                   | 1                    | 0                          | 1                 | 0                            | 0                   | 0                   |
| AT3G57290          | AT3G56150          | 1                    | 0                          | 0                 | 0                            | 1                   | 0                   | 1                    | 1                          | 1                 | 1                            | 1                   | 0                   |
| AT5G27640          | AT3G56150          | 0                    | 0                          | 0                 | 0                            | 1                   | 0                   | 1                    | 1                          | 1                 | 1                            | 1                   | 0                   |
| AT1G10840          | AT3G57290          | 0                    | 0                          | 0                 | 1                            | 1                   | 0                   | 1                    | 0                          | 0                 | 0                            | 1                   | 0                   |
| AT5G27640          | AT3G57290          | 0                    | 0                          | 0                 | 0                            | 1                   | 0                   | 1                    | 0                          | 0                 | 0                            | 1                   | 0                   |
| AT3G13110          | AT3G59760          | 0                    | 1                          | 0                 | 0                            | 0                   | 0                   | 1                    | 1                          | 1                 | 1                            | 1                   | 1                   |
| AT5G42980          | AT3G60750          | 1                    | 1                          | 1                 | 0                            | 1                   | 1                   | 1                    | 1                          | 1                 | 1                            | 1                   | 1                   |
| AT2G41620          | AT3G62030          | 1                    | 0                          | 0                 | 0                            | 1                   | 0                   | 1                    | 1                          | 0                 | 1                            | 0                   | 1                   |
| AT5G42980          | AT3G62030          | 1                    | 1                          | 1                 | 0                            | 1                   | 1                   | 1                    | 1                          | 0                 | 1                            | 0                   | 1                   |
| AT1G62020          | AT4G01900          | 1                    | 0                          | 1                 | 1                            | 1                   | 1                   | 1                    | 0                          | 1                 | 0                            | 1                   | 0                   |
| AT3G57560          | AT4G01900          | 1                    | 0                          | 0                 | 0                            | 0                   | 0                   | 1                    | 0                          | 1                 | 0                            | 1                   | 0                   |
| AT2G46280          | AT4G05420          | 1                    | 0                          | 0                 | 1                            | 1                   | 0                   | 0                    | 0                          | 0                 | 1                            | 1                   | 0                   |
| AT3G53420          | AT4G11850          | 0                    | 0                          | 1                 | 1                            | 0                   | 1                   | 0                    | 0                          | 0                 | 0                            | 1                   | 0                   |
| AT3G13110          | AT4G14880          | 0                    | 1                          | 0                 | 0                            | 0                   | 0                   | 1                    | 1                          | 1                 | 0                            | 1                   | 1                   |
| AT2G20580          | AT4G19006          | 1                    | 0                          | 1                 | 1                            | 1                   | 0                   | 0                    | 0                          | 0                 | 0                            | 1                   | 0                   |
| AT2G41620          | AT4G20360          | 1                    | 0                          | 0                 | 0                            | 1                   | 0                   | 1                    | 1                          | 0                 | 0                            | 0                   | 0                   |
| AT1G06950          | AT4G23430          | 1                    | 1                          | 1                 | 1                            | 1                   | 1                   | 0                    | 1                          | 0                 | 0                            | 0                   | 0                   |
| AT2G41620          | AT4G24190          | 1                    | 0                          | 0                 | 0                            | 1                   | 0                   | 1                    | 1                          | 1                 | 1                            | 1                   | 1                   |
| AT2G20580          | AT4G24820          | 1                    | 0                          | 1                 | 1                            | 1                   | 0                   | 1                    | 0                          | 1                 | 1                            | 1                   | 0                   |
| AT2G18960          | AT4G27500          | 1                    | 1                          | 1                 | 1                            | 1                   | 1                   | 1                    | 0                          | 0                 | 0                            | 1                   | 0                   |
| AT1G76030          | AT4G29130          | 0                    | 0                          | 0                 | 0                            | 0                   | 1                   | 1                    | 1                          | 1                 | 1                            | 1                   | 1                   |
| AT3G01280          | AT4G29130          | 1                    | 1                          | 1                 | 1                            | 1                   | 1                   | 1                    | 1                          | 1                 | 1                            | 1                   | 1                   |
| AT1G78300          | AT4G30190          | 1                    | 1                          | 1                 | 1                            | 1                   | 0                   | 1                    | 1                          | 1                 | 0                            | 1                   | 1                   |
| AT4G01900          | AT4G31480          | 1                    | 0                          | 1                 | 0                            | 1                   | 0                   | 0                    | 0                          | 0                 | 1                            | 0                   | 0                   |

Supplementary Tables pertaining to Figure 2

Supplementary Table S9. Proteins of the root cellular proteome that are also found in The Arabidopsis Information Resource (TAIR) and BioGRID databases

Proteins of the Root Cellular Proteome found in TAIR and BioGRID databases

TAIR and BioGRID Interactors (No Neciprocal or Self-Interactions)

| Interactor A Locus | Interactor B Locus | A Root Hairs (COBL9) | A Non-Hair Epidermis (WER) | A Cortex (CORTEX) | A Endodermis/Quiescent (SCR) | A Vasculature (WOL) | A Columella (PET11) | B Root Hairs (COBL9) | B Non-Hair Epidermis (WER) | B Cortex (CORTEX) | B Endodermis/Quiescent (SCR) | B Vasculature (WOL) | B Columella (PET11) |
|--------------------|--------------------|----------------------|----------------------------|-------------------|------------------------------|---------------------|---------------------|----------------------|----------------------------|-------------------|------------------------------|---------------------|---------------------|
| AT4G01900          | AT4G34450          | 1                    | 0                          | 1                 | 0                            | 1                   | 0                   | 1                    | 1                          | 1                 | 1                            | 1                   | 1                   |
| AT4G09320          | AT4G35090          | 1                    | 1                          | 1                 | 1                            | 1                   | 1                   | 1                    | 1                          | 1                 | 1                            | 1                   | 1                   |
| AT4G26570          | AT4G38800          | 1                    | 0                          | 0                 | 0                            | 0                   | 1                   | 0                    | 0                          | 0                 | 1                            | 1                   | 0                   |
| AT2G21660          | AT4G39260          | 1                    | 1                          | 1                 | 1                            | 1                   | 1                   | 1                    | 0                          | 0                 | 1                            | 1                   | 1                   |
| AT2G41620          | AT5G02500          | 1                    | 0                          | 0                 | 0                            | 1                   | 0                   | 1                    | 1                          | 1                 | 1                            | 1                   | 1                   |
| AT4G02510          | AT5G05000          | 1                    | 1                          | 1                 | 1                            | 0                   | 0                   | 1                    | 0                          | 1                 | 1                            | 1                   | 0                   |
| AT4G32410          | AT5G05170          | 1                    | 1                          | 1                 | 1                            | 1                   | 0                   | 1                    | 1                          | 1                 | 1                            | 1                   | 0                   |
| AT2G20580          | AT5G05780          | 1                    | 0                          | 1                 | 1                            | 1                   | 0                   | 1                    | 0                          | 0                 | 0                            | 1                   | 0                   |
| AT2G20580          | AT5G09900          | 1                    | 0                          | 1                 | 1                            | 1                   | 0                   | 1                    | 0                          | 0                 | 0                            | 1                   | 0                   |
| AT3G09840          | AT5G10450          | 1                    | 1                          | 0                 | 1                            | 1                   | 0                   | 1                    | 0                          | 0                 | 1                            | 1                   | 0                   |
| AT4G35000          | AT5G10450          | 1                    | 1                          | 1                 | 1                            | 1                   | 1                   | 1                    | 0                          | 0                 | 1                            | 1                   | 0                   |
| AT3G02230          | AT5G15650          | 1                    | 1                          | 1                 | 1                            | 1                   | 1                   | 1                    | 1                          | 1                 | 1                            | 1                   | 1                   |
| AT2G42590          | AT5G16050          | 1                    | 0                          | 0                 | 0                            | 1                   | 0                   | 1                    | 0                          | 1                 | 1                            | 1                   | 0                   |
| AT1G06950          | AT5G16620          | 1                    | 1                          | 1                 | 1                            | 1                   | 1                   | 1                    | 0                          | 0                 | 0                            | 1                   | 0                   |
| AT4G23430          | AT5G16620          | 0                    | 1                          | 0                 | 0                            | 0                   | 0                   | 1                    | 0                          | 0                 | 0                            | 1                   | 0                   |
| AT2G20580          | AT5G23540          | 1                    | 0                          | 1                 | 1                            | 1                   | 0                   | 1                    | 0                          | 0                 | 0                            | 1                   | 0                   |
| AT1G10840          | AT5G27640          | 0                    | 0                          | 0                 | 1                            | 1                   | 0                   | 0                    | 0                          | 0                 | 0                            | 1                   | 0                   |
| AT5G26710          | AT5G35630          | 1                    | 0                          | 0                 | 0                            | 1                   | 0                   | 1                    | 1                          | 1                 | 1                            | 1                   | 1                   |
| AT5G42980          | AT5G35630          | 1                    | 1                          | 1                 | 0                            | 1                   | 1                   | 1                    | 1                          | 1                 | 1                            | 1                   | 1                   |
| AT2G41620          | AT5G40480          | 1                    | 0                          | 0                 | 0                            | 1                   | 0                   | 1                    | 1                          | 1                 | 1                            | 1                   | 1                   |
| AT3G20000          | AT5G40930          | 1                    | 1                          | 1                 | 1                            | 1                   | 1                   | 1                    | 0                          | 0                 | 0                            | 1                   | 0                   |
| AT4G23630          | AT5G41600          | 0                    | 0                          | 0                 | 0                            | 0                   | 1                   | 1                    | 1                          | 1                 | 0                            | 0                   | 1                   |
| AT5G62390          | AT5G42020          | 1                    | 0                          | 0                 | 1                            | 1                   | 1                   | 1                    | 1                          | 1                 | 1                            | 1                   | 1                   |
| AT1G59610          | AT5G42080          | 1                    | 1                          | 1                 | 1                            | 1                   | 1                   | 1                    | 1                          | 1                 | 1                            | 1                   | 1                   |
| AT1G48030          | AT5G42980          | 1                    | 1                          | 1                 | 1                            | 1                   | 1                   | 1                    | 1                          | 1                 | 0                            | 1                   | 1                   |
| AT1G21750          | AT5G43060          | 1                    | 1                          | 1                 | 1                            | 1                   | 1                   | 1                    | 1                          | 1                 | 1                            | 1                   | 1                   |

**Supplementary Tables pertaining to Figure 2**

**Supplementary Table S9. Proteins of the root cellular proteome that are also found in The Arabidopsis Information Resource (TAIR) and BioGRID databases**

**Proteins of the Root Cellular Proteome found in TAIR and BioGRID databases**

**TAIR and BioGRID Interactors (No Neciprocal or Self-Interactions)**

| Interactor<br>A Locus | Interactor<br>B Locus | A<br>Root<br>Hairs<br>(COB<br>L9) | A<br>Non-<br>Hair<br>Epider<br>mis<br>(WER) | A<br>Cortex<br>(CORT<br>EX) | A<br>Endod<br>ermis/<br>Quies<br>cent<br>(SCR) | A<br>Vascu<br>lature<br>(WOL) | A<br>Colum<br>ella<br>(PET1<br>11) | B<br>Root<br>Hairs<br>(COB<br>L9) | B<br>Non-<br>Hair<br>Epider<br>mis<br>(WER) | B<br>Cortex<br>(CORT<br>EX) | B<br>Endod<br>ermis/<br>Quies<br>cent<br>(SCR) | B<br>Vascu<br>lature<br>(WOL) | B<br>Colum<br>ella<br>(PET1<br>11) |
|-----------------------|-----------------------|-----------------------------------|---------------------------------------------|-----------------------------|------------------------------------------------|-------------------------------|------------------------------------|-----------------------------------|---------------------------------------------|-----------------------------|------------------------------------------------|-------------------------------|------------------------------------|
| AT1G50940             | AT5G43430             | 0                                 | 1                                           | 0                           | 0                                              | 0                             | 0                                  | 1                                 | 0                                           | 0                           | 0                                              | 0                             | 0                                  |
| AT2G20580             | AT5G45620             | 1                                 | 0                                           | 1                           | 1                                              | 1                             | 0                                  | 1                                 | 0                                           | 0                           | 0                                              | 1                             | 0                                  |
| AT5G16620             | AT5G50920             | 1                                 | 0                                           | 0                           | 0                                              | 1                             | 0                                  | 1                                 | 1                                           | 1                           | 0                                              | 1                             | 1                                  |
| AT2G41620             | AT5G51200             | 1                                 | 0                                           | 0                           | 0                                              | 1                             | 0                                  | 1                                 | 0                                           | 0                           | 0                                              | 1                             | 0                                  |
| AT3G05420             | AT5G59880             | 1                                 | 0                                           | 0                           | 0                                              | 0                             | 0                                  | 1                                 | 0                                           | 1                           | 0                                              | 0                             | 1                                  |
| AT1G47260             | AT5G63510             | 1                                 | 1                                           | 1                           | 1                                              | 1                             | 1                                  | 1                                 | 1                                           | 0                           | 0                                              | 1                             | 0                                  |
| AT4G32410             | AT5G64740             | 1                                 | 1                                           | 1                           | 1                                              | 1                             | 0                                  | 1                                 | 0                                           | 0                           | 0                                              | 1                             | 0                                  |
| AT5G05170             | AT5G64740             | 1                                 | 1                                           | 1                           | 1                                              | 1                             | 0                                  | 1                                 | 0                                           | 0                           | 0                                              | 1                             | 0                                  |
| AT5G42980             | AT5G66530             | 1                                 | 1                                           | 1                           | 0                                              | 1                             | 1                                  | 1                                 | 0                                           | 1                           | 0                                              | 0                             | 0                                  |

**Supplementary Tables pertaining to Figure 2**

**Supplementary Table S9. Proteins of the root cellular proteome that are also found in The Arabidopsis Information Resource (TAIR) and BioGRID databases**

**Proteins of the Root Cellular Proteome found in TAIR and BioGRID databases**

**TAIR and BioGRID Self Interactors**

| Locus     | Root Hairs (COBL9) | Non-Hair Epidermis (WER) | Cortex (CORTEX) | Endodermis/ Quiescent (SCR) | Vasculature (WOL) | Columella (PET111) |
|-----------|--------------------|--------------------------|-----------------|-----------------------------|-------------------|--------------------|
| AT1G01040 | 0                  | 0                        | 0               | 0                           | 1                 | 0                  |
| AT1G10290 | 1                  | 0                        | 0               | 1                           | 1                 | 1                  |
| AT1G27450 | 1                  | 0                        | 0               | 0                           | 0                 | 1                  |
| AT1G29150 | 1                  | 0                        | 0               | 1                           | 1                 | 0                  |
| AT1G32400 | 0                  | 0                        | 0               | 1                           | 0                 | 0                  |
| AT1G35720 | 1                  | 1                        | 1               | 1                           | 1                 | 1                  |
| AT1G47260 | 1                  | 1                        | 1               | 1                           | 1                 | 1                  |
| AT2G13560 | 1                  | 0                        | 0               | 0                           | 1                 | 0                  |
| AT2G18960 | 1                  | 1                        | 1               | 1                           | 1                 | 1                  |
| AT2G21660 | 1                  | 1                        | 1               | 1                           | 1                 | 1                  |
| AT2G36910 | 0                  | 0                        | 0               | 0                           | 1                 | 0                  |
| AT2G38280 | 1                  | 0                        | 0               | 1                           | 0                 | 0                  |
| AT2G38750 | 1                  | 1                        | 1               | 0                           | 1                 | 1                  |
| AT2G39630 | 1                  | 0                        | 0               | 0                           | 0                 | 1                  |
| AT3G09260 | 1                  | 1                        | 1               | 1                           | 1                 | 1                  |
| AT3G09840 | 1                  | 1                        | 0               | 1                           | 1                 | 0                  |
| AT3G10730 | 0                  | 0                        | 1               | 0                           | 0                 | 0                  |
| AT3G13110 | 0                  | 1                        | 0               | 0                           | 0                 | 0                  |
| AT3G13300 | 0                  | 0                        | 0               | 0                           | 1                 | 0                  |
| AT3G52850 | 0                  | 0                        | 1               | 0                           | 0                 | 0                  |
| AT3G59760 | 1                  | 1                        | 1               | 1                           | 1                 | 1                  |
| AT3G62830 | 1                  | 1                        | 1               | 1                           | 1                 | 1                  |
| AT4G00570 | 1                  | 1                        | 1               | 0                           | 1                 | 1                  |
| AT4G01900 | 1                  | 0                        | 1               | 0                           | 1                 | 0                  |
| AT4G16760 | 1                  | 1                        | 1               | 1                           | 1                 | 0                  |
| AT4G20850 | 1                  | 1                        | 1               | 1                           | 1                 | 1                  |
| AT4G23630 | 0                  | 0                        | 0               | 0                           | 0                 | 1                  |
| AT4G29130 | 1                  | 1                        | 1               | 1                           | 1                 | 1                  |
| AT4G33650 | 0                  | 0                        | 0               | 0                           | 1                 | 0                  |

**Supplementary Tables pertaining to Figure 2**

**Supplementary Table S9. Proteins of the root cellular proteome that are also found in The Arabidopsis Information Resource (TAIR) and BioGRID databases**

**Proteins of the Root Cellular Proteome found in TAIR and BioGRID databases**

**TAIR and BioGRID Self Interactors**

| <b>Locus</b> | <b>Root Hairs<br/>(COBL9)</b> | <b>Non-Hair<br/>Epidermis<br/>(WER)</b> | <b>Cortex<br/>(CORTEX)</b> | <b>Endodermis/<br/>Quiescent<br/>(SCR)</b> | <b>Vasculature<br/>(WOL)</b> | <b>Columella<br/>(PET111)</b> |
|--------------|-------------------------------|-----------------------------------------|----------------------------|--------------------------------------------|------------------------------|-------------------------------|
| AT4G39260    | 1                             | 0                                       | 0                          | 1                                          | 1                            | 1                             |
| AT5G04990    | 1                             | 1                                       | 0                          | 0                                          | 0                            | 0                             |
| AT5G42080    | 1                             | 1                                       | 1                          | 1                                          | 1                            | 1                             |
| AT5G63310    | 0                             | 0                                       | 1                          | 0                                          | 0                            | 0                             |

**Supplementary Tables pertaining to Figure 2**

**Supplementary Table S9. Proteins of the root cellular proteome that are also found in The Arabidopsis Information Resource (TAIR) and BioGRID databases**

**Proteins of the Root Cellular Proteome found in TAIR and BioGRID databases**

**TAIR and BioGRID Reciprocal Interactors (only one pair was considered for the full list in columns I-V of this file)**

| Interactor A Locus | Interactor B Locus | A Root Hairs (COBL9) | A Non-Hair Epidermis (WER) | A Cortex (CORTEX) | A Endodermis/Quiescent (SCR) | A Vasculature (WOL) | A Columella (PET11) | B Root Hairs (COBL9) | B Non-Hair Epidermis (WER) | B Cortex (CORTEX) | B Endodermis/Quiescent (SCR) | B Vasculature (WOL) | B Columella (PET11) |
|--------------------|--------------------|----------------------|----------------------------|-------------------|------------------------------|---------------------|---------------------|----------------------|----------------------------|-------------------|------------------------------|---------------------|---------------------|
| AT4G23430          | AT1G06950          | 0                    | 1                          | 0                 | 0                            | 0                   | 0                   | 1                    | 1                          | 1                 | 1                            | 1                   | 1                   |
| AT5G27640          | AT1G10840          | 0                    | 0                          | 0                 | 0                            | 1                   | 0                   | 0                    | 0                          | 0                 | 1                            | 1                   | 0                   |
| AT3G19390          | AT1G21750          | 1                    | 0                          | 0                 | 0                            | 1                   | 0                   | 1                    | 1                          | 1                 | 1                            | 1                   | 1                   |
| AT5G43060          | AT1G21750          | 1                    | 1                          | 1                 | 1                            | 1                   | 1                   | 1                    | 1                          | 1                 | 1                            | 1                   | 1                   |
| AT1G70310          | AT1G23820          | 1                    | 0                          | 0                 | 1                            | 0                   | 0                   | 1                    | 0                          | 1                 | 1                            | 1                   | 0                   |
| AT3G20000          | AT1G27390          | 1                    | 1                          | 1                 | 1                            | 1                   | 1                   | 1                    | 0                          | 0                 | 0                            | 1                   | 0                   |
| AT2G38750          | AT1G35720          | 1                    | 1                          | 1                 | 0                            | 1                   | 1                   | 1                    | 1                          | 1                 | 1                            | 1                   | 1                   |
| AT5G63510          | AT1G47260          | 1                    | 1                          | 0                 | 0                            | 1                   | 0                   | 1                    | 1                          | 1                 | 1                            | 1                   | 1                   |
| AT5G43430          | AT1G50940          | 1                    | 0                          | 0                 | 0                            | 0                   | 0                   | 0                    | 1                          | 0                 | 0                            | 0                   | 0                   |
| AT5G42080          | AT1G59610          | 1                    | 1                          | 1                 | 1                            | 1                   | 1                   | 1                    | 1                          | 1                 | 1                            | 1                   | 1                   |
| AT3G28860          | AT1G73590          | 0                    | 0                          | 1                 | 1                            | 1                   | 0                   | 0                    | 0                          | 0                 | 0                            | 1                   | 0                   |
| AT4G29130          | AT1G76030          | 1                    | 1                          | 1                 | 1                            | 1                   | 1                   | 0                    | 0                          | 0                 | 0                            | 0                   | 1                   |
| AT4G27500          | AT2G18960          | 1                    | 0                          | 0                 | 0                            | 1                   | 0                   | 1                    | 1                          | 1                 | 1                            | 1                   | 1                   |
| AT3G20000          | AT2G19080          | 1                    | 1                          | 1                 | 1                            | 1                   | 1                   | 1                    | 0                          | 0                 | 1                            | 1                   | 1                   |
| AT4G39260          | AT2G21660          | 1                    | 0                          | 0                 | 1                            | 1                   | 1                   | 1                    | 1                          | 1                 | 1                            | 1                   | 1                   |
| AT4G05420          | AT2G46280          | 0                    | 0                          | 0                 | 1                            | 1                   | 0                   | 1                    | 0                          | 0                 | 1                            | 1                   | 0                   |
| AT4G29130          | AT3G01280          | 1                    | 1                          | 1                 | 1                            | 1                   | 1                   | 1                    | 1                          | 1                 | 1                            | 1                   | 1                   |
| AT5G10450          | AT3G09840          | 1                    | 0                          | 0                 | 1                            | 1                   | 0                   | 1                    | 1                          | 0                 | 1                            | 1                   | 0                   |
| AT3G59760          | AT3G13110          | 1                    | 1                          | 1                 | 1                            | 1                   | 1                   | 0                    | 1                          | 0                 | 0                            | 0                   | 0                   |
| AT4G14880          | AT3G13110          | 1                    | 1                          | 1                 | 0                            | 1                   | 1                   | 0                    | 1                          | 0                 | 0                            | 0                   | 0                   |
| AT3G27080          | AT3G20000          | 1                    | 0                          | 0                 | 0                            | 1                   | 0                   | 1                    | 1                          | 1                 | 1                            | 1                   | 1                   |
| AT5G40930          | AT3G20000          | 1                    | 0                          | 0                 | 0                            | 1                   | 0                   | 1                    | 1                          | 1                 | 1                            | 1                   | 1                   |
| AT4G01900          | AT3G57560          | 1                    | 0                          | 1                 | 0                            | 1                   | 0                   | 1                    | 0                          | 0                 | 0                            | 0                   | 0                   |
| AT5G05000          | AT4G02510          | 1                    | 0                          | 1                 | 1                            | 1                   | 0                   | 1                    | 1                          | 1                 | 1                            | 0                   | 0                   |
| AT5G41600          | AT4G23630          | 1                    | 1                          | 1                 | 0                            | 0                   | 1                   | 0                    | 0                          | 0                 | 0                            | 0                   | 1                   |
| AT5G05170          | AT4G32410          | 1                    | 1                          | 1                 | 1                            | 1                   | 0                   | 1                    | 1                          | 1                 | 1                            | 1                   | 0                   |

**Supplementary Tables pertaining to Figure 2**

**Supplementary Table S9. Proteins of the root cellular proteome that are also found in The Arabidopsis Information Resource (TAIR) and BioGRID databases**

**Proteins of the Root Cellular Proteome found in TAIR and BioGRID databases**

**TAIR and BioGRID Reciprocal Interactors (only one pair was considered for the full list in columns I-V of this file)**

| Interactor<br>A Locus | Interactor<br>B Locus | A<br>Root<br>Hairs<br>(COB<br>L9) | A<br>Non-<br>Hair<br>Epider<br>mis<br>(WER) | A<br>Cortex<br>(CORT<br>EX) | A<br>Endod<br>ermis/<br>Quies<br>cent<br>(SCR) | A<br>Vascu<br>lature<br>(WOL) | A<br>Colum<br>ella<br>(PET1<br>11) | B<br>Root<br>Hairs<br>(COB<br>L9) | B<br>Non-<br>Hair<br>Epider<br>mis<br>(WER) | B<br>Cortex<br>(CORT<br>EX) | B<br>Endod<br>ermis/<br>Quies<br>cent<br>(SCR) | B<br>Vascu<br>lature<br>(WOL) | B<br>Colum<br>ella<br>(PET1<br>11) |
|-----------------------|-----------------------|-----------------------------------|---------------------------------------------|-----------------------------|------------------------------------------------|-------------------------------|------------------------------------|-----------------------------------|---------------------------------------------|-----------------------------|------------------------------------------------|-------------------------------|------------------------------------|
|-----------------------|-----------------------|-----------------------------------|---------------------------------------------|-----------------------------|------------------------------------------------|-------------------------------|------------------------------------|-----------------------------------|---------------------------------------------|-----------------------------|------------------------------------------------|-------------------------------|------------------------------------|

|           |           |   |   |   |   |   |   |   |   |   |   |   |   |
|-----------|-----------|---|---|---|---|---|---|---|---|---|---|---|---|
| AT5G64740 | AT4G32410 | 1 | 0 | 0 | 0 | 1 | 0 | 1 | 1 | 1 | 1 | 1 | 0 |
| AT5G10450 | AT4G35000 | 1 | 0 | 0 | 1 | 1 | 0 | 1 | 1 | 1 | 1 | 1 | 1 |
| AT5G64740 | AT5G05170 | 1 | 0 | 0 | 0 | 1 | 0 | 1 | 1 | 1 | 1 | 1 | 0 |



Supplementary Tables pertaining to Figure 2

Supplementary Table S10. Pearson Correlation Coefficients (PCCs) of RNA and protein profiles of genomic features

Pearson Correlation Coefficient Between Root Cellular Proteome by GeLC-MS/MS Proteomics and Thresholded Microarrays of Dinneny et al. 2008

|                     | Root Hairs<br>(COBL9) | Non-Hair<br>Epidermis<br>(WER) | Cortex<br>(CORTEX) | Endodermis/<br>Quiescent<br>(SCR) | Vasculature<br>(WOL) | Columella<br>(PET111) | Total Number of Proteins in<br>the Root Cellular Proteome in<br>this category |
|---------------------|-----------------------|--------------------------------|--------------------|-----------------------------------|----------------------|-----------------------|-------------------------------------------------------------------------------|
| <b>Short CDS</b>    |                       |                                |                    |                                   |                      |                       |                                                                               |
| CDS≤800 bps         | 0.18                  | 0.28                           | 0.36               | 0.26                              | 0.22                 | 0.36                  | 97                                                                            |
| CDS≤900 bps         | 0.19                  | 0.15                           | 0.36               | 0.24                              | 0.26                 | 0.29                  | 130                                                                           |
| CDS≤1000 bps        | 0.18                  | 0.18                           | 0.35               | 0.24                              | 0.24                 | 0.31                  | 177                                                                           |
| CDS≤1100 bps        | 0.18                  | 0.16                           | 0.28               | 0.27                              | 0.27                 | 0.33                  | 244                                                                           |
| <b>Long CDS</b>     |                       |                                |                    |                                   |                      |                       |                                                                               |
| CDS≥2500 bps        | 0.34                  | 0.28                           | 0.34               | 0.39                              | 0.37                 | 0.4                   | 669                                                                           |
| CDS≥3000 bps        | 0.37                  | 0.26                           | 0.38               | 0.36                              | 0.38                 | 0.4                   | 579                                                                           |
| CDS≥3500 bps        | 0.35                  | 0.27                           | 0.36               | 0.36                              | 0.34                 | 0.39                  | 423                                                                           |
| CDS≥4000 bps        | 0.37                  | 0.3                            | 0.37               | 0.36                              | 0.3                  | 0.41                  | 248                                                                           |
| CDS≥4500 bps        | 0.37                  | 0.37                           | 0.39               | 0.36                              | 0.34                 | 0.42                  | 200                                                                           |
| CDS≥5000 bps        | 0.42                  | 0.42                           | 0.41               | 0.41                              | 0.36                 | 0.39                  | 172                                                                           |
| CDS≥5500 bps        | 0.39                  | 0.33                           | 0.36               | 0.46                              | 0.34                 | 0.43                  | 108                                                                           |
| <b>Short 3'UTRs</b> |                       |                                |                    |                                   |                      |                       |                                                                               |
| 3'UTR≤150 bps       | 0.31                  | 0.25                           | 0.38               | 0.38                              | 0.24                 | 0.42                  | 185                                                                           |
| 3'UTR≤175 bps       | 0.3                   | 0.21                           | 0.37               | 0.29                              | 0.26                 | 0.38                  | 337                                                                           |
| 3'UTR≤200 bps       | 0.3                   | 0.2                            | 0.33               | 0.34                              | 0.26                 | 0.37                  | 559                                                                           |
| <b>Long 3'UTRs</b>  |                       |                                |                    |                                   |                      |                       |                                                                               |
| 3'UTR≥300 bps       | 0.33                  | 0.35                           | 0.36               | 0.4                               | 0.38                 | 0.42                  | 464                                                                           |
| 3'UTR≥350 bps       | 0.33                  | 0.44                           | 0.37               | 0.45                              | 0.36                 | 0.43                  | 252                                                                           |
| 3'UTR≥400 bps       | 0.49                  | 0.54                           | 0.44               | 0.48                              | 0.46                 | 0.46                  | 145                                                                           |

**Supplementary Table S11.** Peptide-level annotated quantitative output from label-free proteomics using peak integration. Tranche hash:  
CeUzpnLVCqXrNWTg1/6JY4R2t15IfV1pKCkaX2yMVqYtEck6tedT5cKhIT00y+Nj  
M75q3a5KREfWBTMQJgD30zh4WQAAAAAAAAAAD+g==

These raw data have been uploaded for public release and access at the Proteome Commons and are found at [www.proteomecommons.org/tranche](http://www.proteomecommons.org/tranche) under the project “The Protein Expression Landscape of the *Arabidopsis* Root”. The data files for Supplementary Table S11, which contain peptide-level data output from label-free proteomics using peak integration of the six cell types (root hairs, non-hair epidermis, cortex, endodermis/quiescent center, vasculature, columella) and whole roots that were isolated by FACS, are found at Proteome Commons under the aforementioned project title and are accessible with the following Tranche hash:

2vxeLdEgJYUtGS1qbaktSbd1JuYRLQAHeB3YfAeF+F/ZfEiZwzE2ctZqD76Ocvsy  
uTHRxEWYwvO4KbhVIZYZHj36TEEAAAAAAAAAADxQ==

All encryption at the tranche repository should be removed, but if a passphrase is requested, it is 'arabidopsis'.

Supplementary Table S11 can also be found at the Duke Genome Express Repository at the following:

[https://discovery.genome.duke.edu/express/resources/2010/Final\\_Supplementary\\_Table\\_S11.xls](https://discovery.genome.duke.edu/express/resources/2010/Final_Supplementary_Table_S11.xls)

### **Supplementary MS/MS Spectra of Supplementary Table S11:**

Data-dependent acquisition (DDA) MS/MS spectra that were used to generate the peptide-level quantitative output mentioned above have been uploaded in a Scaffold 3 (.sf3) file to [www.proteomecommons.org/tranche](http://www.proteomecommons.org/tranche) under the project “The Protein Expression Landscape of the *Arabidopsis* Root”, at the following hash:

X23FuCTH8OfIWJlsmY6qRkJNQ1xRB/O054rp+yohmAuHn6nwn3zm5VmheEFV  
CYwlUKp4fn2DYtRfEjgpa33/dfRXveEAAAAAAAAAAExQ==

Data-independent acquisition (MSE) spectra were too large for Tranche upload and have thus been added to a Duke-based public, non-editable repository called Express. This data is available as a Scaffold 3 (.sf3) file at the following link:  
[https://discovery.genome.duke.edu/express/resources/2010/Petricka\\_MSESpectra\\_LabelFreeSupplemental\\_Condensed.sf3](https://discovery.genome.duke.edu/express/resources/2010/Petricka_MSESpectra_LabelFreeSupplemental_Condensed.sf3)

**Supplementary Tables pertaining to Figure 2**

**Supplementary Table S12. Root cell type proteins quantified by peak-integration proteomics**

Label-free proteomic log intensity values obtained by peak integration for proteins with  $\geq 2$  unique peptides

| Locus       | Annotation                                                                                                                                                 | Root Hairs (COBL9) | Non-Hair Epidermis (WER) | Cortex (CORTEX) | Endodermis/ Quiescent (SCR) | Vasculature (WOL) | Columella (PET111) |
|-------------|------------------------------------------------------------------------------------------------------------------------------------------------------------|--------------------|--------------------------|-----------------|-----------------------------|-------------------|--------------------|
| AT1G01090.1 | PDH-E1 ALPHA (PYRUVATE DEHYDROGENASE E1 ALPHA); pyruvate dehydrogenase (acetyl-transferring)                                                               | 4.3035             | 4.3975                   | 4.462           | 4.3879                      | 4.262             | 4.2045             |
| AT1G02780.1 | Symbols: EMB2386   EMB2386 (EMBRYO DEFECTIVE 2386); structural constituent of ribosome   chr1:608120-609391 REVERSE                                        | 4.7852             | 4.6865                   | 4.7801          | 5.0038                      | 4.9457            | 4.9515             |
| AT1G04040.1 | Symbols:   acid phosphatase class B family protein   chr1:1042563-1043818 REVERSE                                                                          | 4.5854             | 4.1787                   | 3.4836          | 3.4918                      | 4.2366            | 3.5197             |
| AT1G04270.1 | RPS15 (RIBOSOMAL PROTEIN S15); structural constituent of ribosome                                                                                          | 4.3578             | 4.4281                   | 4.3348          | 4.568                       | 4.4208            | 4.4056             |
| AT1G04410.1 | malate dehydrogenase, cytosolic, putative                                                                                                                  | 4.9808             | 4.9913                   | 5.2186          | 5.3315                      | 5.2178            | 5.4524             |
| AT1G04430.1 | dehydration-responsive protein-related                                                                                                                     | 4.2382             | 4.3564                   | 4.3535          | 4.3056                      | 4.0263            | 3.9485             |
| AT1G04480.1 | 60S ribosomal protein L23 (RPL23A)                                                                                                                         | 4.5462             | 4.4302                   | 4.4987          | 4.8039                      | 4.5807            | 4.4876             |
| AT1G07660.1 | histone H4                                                                                                                                                 | 5.4627             | 5.6604                   | 5.5348          | 5.4869                      | 5.463             | 5.5973             |
| AT1G07810.1 | Symbols: ATECA1, ACA3, ECA1   ECA1 (CALCIUM-TRANSPORTING ATPASE 1, ENDOPLASMIC RETICULUM-TYPE); calcium-transporting ATPase   chr1:2416678-2420569 FORWARD | 4.6557             | 4.5589                   | 4.5623          | 4.3804                      | 4.4823            | 4.2271             |
| AT1G07890.3 | Symbols: APX1, CS1   APX1 (ascorbate peroxidase 1); L-ascorbate peroxidase   chr1:2438005-2439349 FORWARD                                                  | 4.2865             | 4.2887                   | 4.4674          | 4.6124                      | 4.4281            | 4.6162             |
| AT1G07920.1 | elongation factor 1-alpha / EF-1-alpha                                                                                                                     | 5.7317             | 5.8537                   | 5.9881          | 5.983                       | 5.9425            | 5.8325             |
| AT1G08830.1 | Symbols: CSD1   CSD1 (COPPER/ZINC SUPEROXIDE DISMUTASE 1); superoxide dismutase   chr1:2827700-2829053 FORWARD; Duplicate proteins:                        | 3.8208             | 3.8168                   | 3.9022          | 3.9451                      | 3.9459            | 4.3706             |

**Supplementary Tables pertaining to Figure 2**

**Supplementary Table S12. Root cell type proteins quantified by peak-integration proteomics**

Label-free proteomic log intensity values obtained by peak integration for proteins with  $\geq 2$  unique peptides

| Locus       | Annotation                                                                                                                | Root Hairs (COBL9) | Non-Hair Epidermis (WER) | Cortex (CORTEX) | Endodermis/ Quiescent (SCR) | Vasculature (WOL) | Columella (PET111) |
|-------------|---------------------------------------------------------------------------------------------------------------------------|--------------------|--------------------------|-----------------|-----------------------------|-------------------|--------------------|
|             | AT1G08830.2                                                                                                               |                    |                          |                 |                             |                   |                    |
| AT1G08880.1 | Symbols:   histone H2A, putative   chr1:2847147-2847679 REVERSE                                                           | 4.7062             | 4.8711                   | 4.4733          | 4.6059                      | 4.5889            | 4.7366             |
| AT1G09080.1 | luminal binding protein 3 (BiP-3) (BP3)                                                                                   | 3.8075             | 3.893                    | 4.0949          | 4.0637                      | 4.3407            | 4.4234             |
| AT1G09210.1 | calreticulin 2 (CRT2)                                                                                                     | 5.5183             | 5.3491                   | 5.2665          | 5.2307                      | 5.3066            | 5.3141             |
| AT1G10760.1 | Symbols: SEX1, SOP1, SOP, GWD1, GWD   SEX1 (STARCH EXCESS 1); alpha-glucan, water dikinase   chr1:3581210-3590043 REVERSE | 4.0786             | 4.36                     | 4.2025          | 4.0885                      | 3.9743            | 5.2205             |
| AT1G11580.1 | pectin methylesterase, putative                                                                                           | 2.7402             | 3.0167                   | 4.5972          | 4.5721                      | 3.9457            | 3.4316             |
| AT1G11910.1 | aspartyl protease family protein                                                                                          | 5.0338             | 5.2292                   | 4.9196          | 5.0226                      | 5.0018            | 5.4009             |
| AT1G12230.1 | Symbols:   transaldolase, putative   chr1:4148050-4150708 FORWARD                                                         | 4.1275             | 4.2259                   | 4.4737          | 4.3449                      | 4.2253            | 4.1231             |
| AT1G12840.1 | DET3 (DE-ETIOLATED 3)                                                                                                     | 4.8177             | 4.7421                   | 4.7159          | 4.6478                      | 4.6457            | 4.6319             |
| AT1G13280.1 | Symbols: AOC4   AOC4 (ALLENE OXIDE CYCLASE 4)   chr1:4547621-4548549 FORWARD                                              | 3.8655             | 4.0783                   | 4.042           | 3.8541                      | 3.7912            | 4.7924             |
| AT1G13440.1 | GAPC-2; glyceraldehyde-3-phosphate dehydrogenase                                                                          | 5.7341             | 5.7026                   | 5.9401          | 6.0085                      | 5.8597            | 6.076              |
| AT1G14670.1 | endomembrane protein 70, putative                                                                                         | 4.8889             | 4.8576                   | 4.8497          | 4.6575                      | 4.6676            | 4.6831             |
| AT1G14980.1 | CPN10 (CHAPERONIN 10)                                                                                                     | 5.1199             | 4.973                    | 4.876           | 4.8478                      | 4.9295            | 4.7909             |
| AT1G15690.1 | AVP1 (vacuolar-type H+-pumping pyrophosphatase 1); ATPase                                                                 | 5.4904             | 5.5383                   | 5.6253          | 5.4745                      | 5.4197            | 5.3664             |
| AT1G15930.2 | 40S ribosomal protein S12 (RPS12A)                                                                                        | 4.9478             | 4.8987                   | 5.0684          | 5.2023                      | 5.0841            | 4.9229             |
| AT1G16030.1 | HSP70B (heat shock protein 70B); ATP binding                                                                              | 4.4988             | 4.482                    | 4.6051          | 4.4895                      | 4.4756            | 4.3266             |
| AT1G16300.1 | GAPCP-2; glyceraldehyde-3-phosphate dehydrogenase                                                                         | 4.4686             | 4.2944                   | 4.0976          | 4.1043                      | 4.2884            | 4.2691             |
| AT1G16920.1 | Symbols: RAB11, ATRABA1B   ATRABA1B (ARABIDOPSIS RAB GTPASE HOMOLOG A1B); GTP binding   chr1:5787489-5789147 REVERSE      | 4.8311             | 4.7451                   | 4.7661          | 4.6551                      | 4.6637            | 4.6822             |

**Supplementary Tables pertaining to Figure 2**

**Supplementary Table S12. Root cell type proteins quantified by peak-integration proteomics**

Label-free proteomic log intensity values obtained by peak integration for proteins with  $\geq 2$  unique peptides

| Locus       | Annotation                                                                                                                                                                                                                                        | Root Hairs (COBL9) | Non-Hair Epidermis (WER) | Cortex (CORTEX) | Endodermis/ Quiescent (SCR) | Vasculature (WOL) | Columella (PET111) |
|-------------|---------------------------------------------------------------------------------------------------------------------------------------------------------------------------------------------------------------------------------------------------|--------------------|--------------------------|-----------------|-----------------------------|-------------------|--------------------|
| AT1G18080.1 | ATARCA (Arabidopsis thaliana Homolog of the Tobacco ArcA); nucleotide binding                                                                                                                                                                     | 5.273              | 5.2574                   | 5.4381          | 5.6562                      | 5.5971            | 5.3821             |
| AT1G18540.1 | 60S ribosomal protein L6 (RPL6A)                                                                                                                                                                                                                  | 4.8398             | 4.7961                   | 4.8875          | 5.0494                      | 5.0199            | 4.8908             |
| AT1G20260.1 | Symbols:   hydrogen ion transporting ATP synthase, rotational mechanism / hydrolase, acting on acid anhydrides, catalyzing transmembrane movement of substances / proton-transporting ATPase, rotational mechanism   chr1:7016971-7020290 FORWARD | 5.6748             | 5.5842                   | 5.6299          | 5.4609                      | 5.4978            | 5.5632             |
| AT1G20440.1 | Symbols: COR47, RD17   COR47 (COLD-REGULATED 47)   chr1:7084722-7085664 REVERSE                                                                                                                                                                   | 4.2005             | 4.367                    | 4.3168          | 4.4418                      | 4.6026            | 5.8538             |
| AT1G20450.1 | Symbols: LTI45, ERD10, LTI29   ERD10/LTI45 (EARLY RESPONSIVE TO DEHYDRATION 10)   chr1:7088225-7089097 REVERSE                                                                                                                                    | 3.8053             | 4.2575                   | 4.06            | 4.1044                      | 4.0586            | 5.5525             |
| AT1G20840.1 | TMT1 (TONOPLAST MONOSACCHARIDE TRANSPORTER1); carbohydrate transporter/ nucleoside transporter/ sugar porter                                                                                                                                      | 4.3762             | 4.2011                   | 4.7365          | 4.3945                      | 4.1351            | 4.1164             |
| AT1G21750.1 | ATPDIL1-1 (PDI-LIKE 1-1); protein disulfide isomerase                                                                                                                                                                                             | 4.8076             | 4.5485                   | 4.6275          | 4.4241                      | 4.3814            | 4.4547             |
| AT1G21750.2 | ATPDIL1-1 (PDI-LIKE 1-1); protein disulfide isomerase                                                                                                                                                                                             | 6.1452             | 5.8932                   | 5.9708          | 5.8034                      | 5.8671            | 5.8633             |
| AT1G22300.1 | GRF10 (GENERAL REGULATORY FACTOR 10); protein phosphorylated amino acid binding                                                                                                                                                                   | 4.0811             | 4.1499                   | 4.3115          | 4.4045                      | 4.3411            | 4.5578             |
| AT1G22410.1 | Symbols:   2-dehydro-3-deoxyphosphoheptonate aldolase, putative / 3-deoxy-D-arabino-heptulosonate 7-phosphate synthase,                                                                                                                           | 4.2109             | 4.2561                   | 4.5771          | 4.3643                      | 4.3295            | 3.9828             |

**Supplementary Tables pertaining to Figure 2**

**Supplementary Table S12. Root cell type proteins quantified by peak-integration proteomics**

Label-free proteomic log intensity values obtained by peak integration for proteins with  $\geq 2$  unique peptides

| Locus       | Annotation                                                                                                                 | Root Hairs (COBL9) | Non-Hair Epidermis (WER) | Cortex (CORTEX) | Endodermis/ Quiescent (SCR) | Vasculature (WOL) | Columella (PET111) |
|-------------|----------------------------------------------------------------------------------------------------------------------------|--------------------|--------------------------|-----------------|-----------------------------|-------------------|--------------------|
|             | putative / DAHP synthetase, putative   chr1:7912109-7914731 FORWARD                                                        |                    |                          |                 |                             |                   |                    |
| AT1G22780.1 | Symbols: RPS18A, PFL1, PFL   PFL (POINTED FIRST LEAVES); structural constituent of ribosome   chr1:8067979-8069152 FORWARD | 3.7662             | 3.8216                   | 3.61            | 3.9144                      | 3.1877            | 3.8395             |
| AT1G23190.1 | Symbols:   phosphoglucomutase, cytoplasmic, putative / glucose phosphomutase, putative   chr1:8219935-8224175 FORWARD      | 4.177              | 4.2886                   | 4.3981          | 4.2977                      | 4.4128            | 4.8801             |
| AT1G24180.1 | IAR4 (IAA-conjugate-resistant 4); pyruvate dehydrogenase (acetyl-transferring)                                             | 4.9549             | 4.8369                   | 4.7678          | 4.6518                      | 4.7952            | 4.7708             |
| AT1G24360.1 | 3-oxoacyl-(acyl-carrier protein) reductase, chloroplast / 3-ketoacyl-acyl carrier protein reductase                        | 4.9346             | 4.9776                   | 5.1476          | 5.1216                      | 4.9667            | 4.8718             |
| AT1G26630.1 | Symbols: FBR12   FBR12 (FUMONISIN B1-RESISTANT12); translation initiation factor   chr1:9205955-9207085 FORWARD            | 4.5074             | 4.6234                   | 4.7433          | 4.8167                      | 4.8245            | 4.779              |
| AT1G26850.1 | dehydration-responsive family protein                                                                                      | 4.654              | 4.4763                   | 4.7452          | 4.6327                      | 4.6664            | 4.2054             |
| AT1G27400.1 | Symbols:   60S ribosomal protein L17 (RPL17B)   chr1:25262209-25263627 FORWARD                                             | 4.6769             | 4.7217                   | 4.9164          | 4.956                       | 4.897             | 4.7943             |
| AT1G30120.1 | PDH-E1 BETA (PYRUVATE DEHYDROGENASE E1 BETA); pyruvate dehydrogenase (acetyl-transferring)                                 | 5.0366             | 5.0207                   | 5.2325          | 5.1892                      | 5.0169            | 4.7865             |
| AT1G30580.1 | GTP binding                                                                                                                | 4.4272             | 4.5201                   | 4.7378          | 4.8076                      | 4.7916            | 4.6639             |
| AT1G31812.1 | Symbols: ACBP   ACBP (ACYL-COA-BINDING PROTEIN); acyl-CoA binding   chr1:11411113-11412080 REVERSE                         | 4.5534             | 4.6605                   | 4.7536          | 4.9337                      | 4.8305            | 5.1815             |
| AT1G32900.1 | Symbols:   starch synthase, putative                                                                                       | 2.6594             | 2.8141                   | 3.0109          | 2.099                       | 2.5071            | 4.7327             |

**Supplementary Tables pertaining to Figure 2**

**Supplementary Table S12. Root cell type proteins quantified by peak-integration proteomics**

Label-free proteomic log intensity values obtained by peak integration for proteins with  $\geq 2$  unique peptides

| Locus       | Annotation                                                                                                                                                                                                                                                | Root Hairs (COBL9) | Non-Hair Epidermis (WER) | Cortex (CORTEX) | Endodermis/ Quiescent (SCR) | Vasculature (WOL) | Columella (PET111) |
|-------------|-----------------------------------------------------------------------------------------------------------------------------------------------------------------------------------------------------------------------------------------------------------|--------------------|--------------------------|-----------------|-----------------------------|-------------------|--------------------|
|             | chr1:11920582-11923506 REVERSE                                                                                                                                                                                                                            |                    |                          |                 |                             |                   |                    |
| AT1G33120.1 | 60S ribosomal protein L9 (RPL90B)                                                                                                                                                                                                                         | 5.58               | 5.5641                   | 5.5941          | 5.7217                      | 5.6838            | 5.5383             |
| AT1G34430.1 | EMB3003 (EMBRYO DEFECTIVE 3003); dihydrolipoyllysine-residue acetyltransferase                                                                                                                                                                            | 4.4488             | 4.4485                   | 4.6788          | 4.6342                      | 4.4348            | 4.4431             |
| AT1G35720.1 | ANNAT1 (ANNEXIN ARABIDOPSIS 1); calcium ion binding / calcium-dependent phospholipid binding                                                                                                                                                              | 5.1761             | 4.9839                   | 4.829           | 4.8852                      | 5.0041            | 5.1259             |
| AT1G42960.1 | Symbols:   expressed protein localized to the inner membrane of the chloroplast.   chr1:16128303-16129520 FORWARD                                                                                                                                         | 4.588              | 4.7268                   | 4.6918          | 4.6679                      | 4.4964            | 4.6045             |
| AT1G43170.1 | ARP1 (ARABIDOPSIS RIBOSOMAL PROTEIN 1); structural constituent of ribosome                                                                                                                                                                                | 4.9834             | 4.9605                   | 5.1265          | 5.2511                      | 5.2427            | 4.9975             |
| AT1G47260.1 | APFI; carbonate dehydratase                                                                                                                                                                                                                               | 5.4354             | 5.446                    | 5.3547          | 5.3266                      | 5.281             | 5.2841             |
| AT1G47420.1 | Identical to Unknown protein At1g47420, mitochondrial precursor [Arabidopsis Thaliana] (GB:Q9SX77); similar to APFI, carbonate dehydratase [Arabidopsis thaliana] (TAIR:AT1G47260.1); similar to unknown [Hordeum vulgare subsp. vulgare] (GB:AAL77110.1) | 4.4087             | 4.4561                   | 4.4324          | 4.1966                      | 4.2093            | 4.4842             |
| AT1G48830.1 | Symbols:   40S ribosomal protein S7 (RPS7A)   chr1:18063522-18064603 REVERSE                                                                                                                                                                              | 4.2862             | 4.3724                   | 4.4587          | 4.5592                      | 4.5616            | 4.5192             |
| AT1G48920.1 | Symbols: ATNUC-L1, PARL1   nucleolin, putative   chr1:18101854-18105090 FORWARD                                                                                                                                                                           | 4.7892             | 4.8517                   | 4.6408          | 4.9105                      | 4.9319            | 4.5352             |
| AT1G50430.1 | DWF5 (DWARF 5); sterol delta7 reductase                                                                                                                                                                                                                   | 4.5633             | 4.5316                   | 4.5933          | 4.5155                      | 4.3795            | 4.1361             |
| AT1G51980.1 | mitochondrial processing peptidase alpha subunit, putative                                                                                                                                                                                                | 5.5132             | 5.509                    | 5.4267          | 5.3551                      | 5.3279            | 5.3627             |

**Supplementary Tables pertaining to Figure 2**

**Supplementary Table S12. Root cell type proteins quantified by peak-integration proteomics**

Label-free proteomic log intensity values obtained by peak integration for proteins with  $\geq 2$  unique peptides

| Locus       | Annotation                                                                                                                       | Root Hairs (COBL9) | Non-Hair Epidermis (WER) | Cortex (CORTEX) | Endodermis/ Quiescent (SCR) | Vasculature (WOL) | Columella (PET111) |
|-------------|----------------------------------------------------------------------------------------------------------------------------------|--------------------|--------------------------|-----------------|-----------------------------|-------------------|--------------------|
| AT1G52070.1 | Symbols:   jacalin lectin family protein   chr1:19368809-19370569 REVERSE                                                        | 4.8357             | 5.2877                   | 3.9004          | 4.0216                      | 3.9628            | 4.991              |
| AT1G52360.1 | Symbols:   coatomer protein complex, subunit beta 2 (beta prime), putative   chr1:19499282-19505397 FORWARD                      | 4.1953             | 4.1769                   | 4.3176          | 4.2435                      | 4.2994            | 4.249              |
| AT1G52670.1 | Symbols:   biotin/lipoyl attachment domain-containing protein   chr1:19615119-19617420 REVERSE                                   | 3.9387             | 3.9012                   | 4.0656          | 4.0162                      | 3.8274            | 3.5629             |
| AT1G53240.1 | malate dehydrogenase (NAD), mitochondrial                                                                                        | 5.5681             | 5.5015                   | 5.3211          | 5.3758                      | 5.4696            | 5.5697             |
| AT1G53310.1 | ATPPC1 (PHOSPHOENOLPYRUVATE CARBOXYLASE 1); phosphoenolpyruvate carboxylase                                                      | 3.7746             | 3.871                    | 3.9123          | 4.1441                      | 3.7979            | 4.3982             |
| AT1G54000.1 | myrosinase-associated protein, putative                                                                                          | 5.8383             | 6.0064                   | 5.255           | 5.054                       | 5.4244            | 5.8615             |
| AT1G54010.1 | myrosinase-associated protein, putative                                                                                          | 5.0316             | 5.6632                   | 4.4402          | 4.5121                      | 4.5837            | 4.8613             |
| AT1G54580.1 | Symbols: ACP2   ACP2 (ACYL CARRIER PROTEIN 2)   chr1:20393239-20394437 FORWARD                                                   | 5.2755             | 5.2605                   | 5.457           | 5.4045                      | 5.3149            | 5.1876             |
| AT1G55060.1 | UBQ12 (UBIQUITIN 12)                                                                                                             | 5.146              | 5.2463                   | 5.3233          | 5.4076                      | 5.3788            | 5.4059             |
| AT1G55490.1 | CPN60B (CHAPERONIN 60 BETA); ATP binding / protein binding / unfolded protein binding                                            | 5.1988             | 5.2003                   | 5.2831          | 5.1802                      | 5.173             | 5.0126             |
| AT1G56070.1 | LOS1 (Low expression of osmotically responsive genes 1); translation elongation factor/ translation factor, nucleic acid binding | 5.7203             | 5.7486                   | 5.8758          | 5.9831                      | 5.9424            | 5.7818             |
| AT1G56110.1 | NOP56 (ARABIDOPSIS HOMOLOG OF NUCLEOLAR PROTEIN NOP56)                                                                           | 4.6603             | 4.7391                   | 4.446           | 4.6407                      | 4.7161            | 4.2451             |
| AT1G56330.1 | SAR1 (SECRETION-ASSOCIATED RAS); GTP binding                                                                                     | 5.2853             | 5.1892                   | 5.2897          | 5.2421                      | 5.2243            | 5.2953             |



**Supplementary Tables pertaining to Figure 2**

**Supplementary Table S12. Root cell type proteins quantified by peak-integration proteomics**

Label-free proteomic log intensity values obtained by peak integration for proteins with  $\geq 2$  unique peptides

| Locus       | Annotation                                                                                                                                                                                                                                                      | Root Hairs (COBL9) | Non-Hair Epidermis (WER) | Cortex (CORTEX) | Endodermis/ Quiescent (SCR) | Vasculature (WOL) | Columella (PET111) |
|-------------|-----------------------------------------------------------------------------------------------------------------------------------------------------------------------------------------------------------------------------------------------------------------|--------------------|--------------------------|-----------------|-----------------------------|-------------------|--------------------|
| AT1G56340.2 | CRT1 (CALRETICULIN 1); calcium ion binding                                                                                                                                                                                                                      | 5.8892             | 5.7529                   | 5.6947          | 5.6603                      | 5.7033            | 5.7562             |
| AT1G56410.1 | ERD2/HSP70T-1 (EARLY-RESPONSIVE TO DEHYDRATION 2); ATP binding                                                                                                                                                                                                  | 4.8329             | 4.7919                   | 4.7467          | 4.8083                      | 4.7899            | 4.7104             |
| AT1G57660.1 | Symbols:   60S ribosomal protein L21 (RPL21E)   chr1:21355567-21356364 FORWARD; Duplicate proteins: AT1G57860.1                                                                                                                                                 | 4.6306             | 4.6292                   | 4.7346          | 4.8694                      | 4.8381            | 4.6452             |
| AT1G57720.1 | elongation factor 1B-gamma, putative / eEF-1B gamma, putative                                                                                                                                                                                                   | 4.8988             | 4.8729                   | 5.0267          | 5.1038                      | 5.0457            | 4.8692             |
| AT1G58270.1 | ZW9                                                                                                                                                                                                                                                             | 5.174              | 4.743                    | 4.3926          | 4.3824                      | 4.6678            | 4.5733             |
| AT1G61790.1 | OST3/OST6 family protein                                                                                                                                                                                                                                        | 5.08               | 5.0412                   | 4.9727          | 4.9127                      | 4.893             | 4.822              |
| AT1G62640.1 | Symbols: KAS III   KAS III (3-KETOACYL-ACYL CARRIER PROTEIN SYNTHASE III); 3-oxoacyl-[acyl-carrier-protein] synthase/ catalytic/ transferase, transferring acyl groups other than amino-acyl groups   chr1:23192502-23194737 FORWARD; Duplicate proteins: AT1G6 | 4.0512             | 4.1518                   | 4.3773          | 4.2593                      | 4.0923            | 4.2567             |
| AT1G62660.1 | Symbols:   beta-fructosidase (BFRUCT3) / beta-fructofuranosidase / invertase, vacuolar   chr1:23203614-23207180 FORWARD                                                                                                                                         | 4.4684             | 4.2257                   | 4.8381          | 4.3733                      | 4.3117            | 4.2557             |
| AT1G63940.1 | monodehydroascorbate reductase, putative                                                                                                                                                                                                                        | 5.3439             | 5.3014                   | 5.3177          | 5.1887                      | 5.2929            | 5.4642             |
| AT1G64190.1 | Symbols:   6-phosphogluconate dehydrogenase family protein   chr1:23829212-23830675 REVERSE                                                                                                                                                                     | 4.7168             | 4.6751                   | 4.8689          | 4.703                       | 4.682             | 4.7478             |
| AT1G65930.1 | isocitrate dehydrogenase, putative / NADP+ isocitrate dehydrogenase, putative                                                                                                                                                                                   | 5.0055             | 4.9722                   | 5.3552          | 5.417                       | 5.2747            | 5.2338             |
| AT1G66270.2 | beta-glucosidase (PSR3.2)                                                                                                                                                                                                                                       | 6.1169             | 5.9323                   | 5.1801          | 5.1359                      | 5.6453            | 5.4408             |

**Supplementary Tables pertaining to Figure 2**

**Supplementary Table S12. Root cell type proteins quantified by peak-integration proteomics**

Label-free proteomic log intensity values obtained by peak integration for proteins with  $\geq 2$  unique peptides

| Locus       | Annotation                                                                                                                                                                                                                                                | Root Hairs (COBL9) | Non-Hair Epidermis (WER) | Cortex (CORTEX) | Endodermis/ Quiescent (SCR) | Vasculature (WOL) | Columella (PET111) |
|-------------|-----------------------------------------------------------------------------------------------------------------------------------------------------------------------------------------------------------------------------------------------------------|--------------------|--------------------------|-----------------|-----------------------------|-------------------|--------------------|
| AT1G66280.1 | glycosyl hydrolase family 1 protein                                                                                                                                                                                                                       | 5.6261             | 5.7475                   | 4.7866          | 4.7981                      | 5.2722            | 5.6851             |
| AT1G66580.1 | 60S ribosomal protein L10 (RPL10C)                                                                                                                                                                                                                        | 5.2067             | 5.2206                   | 5.3132          | 5.4638                      | 5.4692            | 5.2873             |
| AT1G67140.1 | Symbols: SWEETIE   SWEETIE (SWEETIE); binding   chr1:25101016-25117372 REVERSE                                                                                                                                                                            | 4.1636             | 4.2337                   | 4.1876          | 4.3219                      | 4.4361            | 4.4564             |
| AT1G70600.1 | Symbols:   60S ribosomal protein L27A (RPL27aC)   chr1:26624831-26625271 REVERSE                                                                                                                                                                          | 4.5333             | 4.5272                   | 4.5075          | 4.8645                      | 4.7356            | 4.5807             |
| AT1G70770.1 | similar to unknown protein [Arabidopsis thaliana] (TAIR:AT1G23170.1); similar to Os01g0128400 [Oryza sativa (japonica cultivar-group)] (GB:NP_001041912.1); similar to hypothetical protein [Platanus x acerifolia] (GB:CAL07978.1); contains domain FAMI | 5.6064             | 5.5481                   | 5.5259          | 5.3838                      | 5.4812            | 5.2712             |
| AT1G72370.1 | P40 (40S ribosomal protein SA); structural constituent of ribosome                                                                                                                                                                                        | 4.9684             | 5.0681                   | 5.0829          | 5.3146                      | 5.2746            | 5.0359             |
| AT1G74030.1 | enolase, putative                                                                                                                                                                                                                                         | 4.9835             | 4.9961                   | 5.1768          | 5.096                       | 5.0235            | 4.9595             |
| AT1G74050.1 | 60S ribosomal protein L6 (RPL6C)                                                                                                                                                                                                                          | 5.1572             | 5.1037                   | 5.2176          | 5.4179                      | 5.4227            | 5.1736             |
| AT1G76090.1 | SMT3 (S-adenosyl-methionine-sterol-C-methyltransferase 3); S-adenosylmethionine-dependent methyltransferase                                                                                                                                               | 4.781              | 4.4459                   | 5.1331          | 4.7999                      | 4.4259            | 3.9332             |
| AT1G77510.1 | ATPDIL1-2 (PDI-LIKE 1-2); protein disulfide isomerase                                                                                                                                                                                                     | 5.7392             | 5.5499                   | 5.5126          | 5.3626                      | 5.4307            | 5.6935             |
| AT1G78300.1 | GRF2 (GENERAL REGULATORY FACTOR 2); protein phosphorylated amino acid binding                                                                                                                                                                             | 4.1006             | 4.0907                   | 4.3406          | 4.3361                      | 4.3253            | 4.2465             |
| AT1G78380.1 | Symbols: GST8, ATGSTU19   ATGSTU19 (GLUTATHIONE TRANSFERASE 8); glutathione transferase   chr1:29491552-                                                                                                                                                  | 4.1064             | 4.429                    | 4.1469          | 4.2344                      | 4.1681            | 5.1389             |

**Supplementary Tables pertaining to Figure 2**

**Supplementary Table S12. Root cell type proteins quantified by peak-integration proteomics**

Label-free proteomic log intensity values obtained by peak integration for proteins with  $\geq 2$  unique peptides

| Locus       | Annotation                                                                                                                                                                                   | Root Hairs (COBL9) | Non-Hair Epidermis (WER) | Cortex (CORTEX) | Endodermis/ Quiescent (SCR) | Vasculature (WOL) | Columella (PET111) |
|-------------|----------------------------------------------------------------------------------------------------------------------------------------------------------------------------------------------|--------------------|--------------------------|-----------------|-----------------------------|-------------------|--------------------|
|             | 29492712 REVERSE                                                                                                                                                                             |                    |                          |                 |                             |                   |                    |
| AT1G78570.1 | Symbols: RHM1, ROL1, ATRHM1   RHM1 (RHAMNOSE BIOSYNTHESIS 1); UDP-L-rhamnose synthase/ UDP-glucose 4,6-dehydratase/ catalytic   chr1:29550110-29552207 FORWARD                               | 4.3609             | 4.3431                   | 4.4649          | 4.0542                      | 4.3067            | 4.0217             |
| AT1G78900.1 | VHA-A; ATP binding / hydrogen ion transporting ATP synthase, rotational mechanism                                                                                                            | 5.8624             | 5.7834                   | 5.8111          | 5.6755                      | 5.738             | 5.6665             |
| AT1G79440.1 | Symbols: SSADH1, SSADH, ALDH5F1   ALDH5F1 (SUCCINIC SEMIALDEHYDE DEHYDROGENASE); 3-chloroallyl aldehyde dehydrogenase/ succinate-semialdehyde dehydrogenase   chr1:29887418-29892168 REVERSE | 4.3236             | 4.4096                   | 4.4837          | 4.2941                      | 4.2009            | 4.5889             |
| AT1G79530.1 | GAPCP-1; glyceraldehyde-3-phosphate dehydrogenase                                                                                                                                            | 5.1886             | 5.1927                   | 5.2567          | 5.1289                      | 5.1121            | 5.1624             |
| AT1G79550.1 | PGK (PHOSPHOGLYCERATE KINASE)                                                                                                                                                                | 4.8457             | 4.8922                   | 5.2159          | 5.2934                      | 5.1916            | 5.1945             |
| AT1G79930.1 | Symbols: HSP91   HSP91; ATP binding   chr1:30063924-30067067 REVERSE                                                                                                                         | 3.7006             | 3.887                    | 3.881           | 4.0282                      | 4.0509            | 3.9498             |
| AT2G01140.1 | fructose-bisphosphate aldolase, putative                                                                                                                                                     | 5.3412             | 5.3473                   | 5.4567          | 5.3614                      | 5.3324            | 5.3299             |
| AT2G01250.1 | 60S ribosomal protein L7 (RPL7B)                                                                                                                                                             | 5.0661             | 5.0365                   | 5.1296          | 5.3206                      | 5.2864            | 5.074              |
| AT2G01720.1 | ribophorin I family protein                                                                                                                                                                  | 5.335              | 5.3252                   | 5.2619          | 5.2093                      | 5.2754            | 5.2896             |
| AT2G03120.1 | signal peptide peptidase family protein                                                                                                                                                      | 4.8033             | 4.7449                   | 4.6511          | 4.5204                      | 4.6408            | 4.7148             |
| AT2G04030.1 | CR88 (EMBRYO DEFECTIVE 1956); ATP binding                                                                                                                                                    | 5.0074             | 5.0149                   | 4.906           | 4.832                       | 4.9329            | 4.8494             |
| AT2G04390.1 | Symbols:   40S ribosomal protein S17 (RPS17A)   chr2:1527911-1528336 FORWARD                                                                                                                 | 5.032              | 5.0923                   | 5.056           | 5.1602                      | 5.1261            | 4.9948             |
| AT2G05710.1 | Symbols:   aconitate hydratase,                                                                                                                                                              | 5.0683             | 4.9923                   | 4.9377          | 4.8899                      | 4.9529            | 5.073              |

**Supplementary Tables pertaining to Figure 2**

**Supplementary Table S12. Root cell type proteins quantified by peak-integration proteomics**

Label-free proteomic log intensity values obtained by peak integration for proteins with  $\geq 2$  unique peptides

| Locus       | Annotation                                                                                                                                                                                                                                                | Root Hairs (COBL9) | Non-Hair Epidermis (WER) | Cortex (CORTEX) | Endodermis/ Quiescent (SCR) | Vasculature (WOL) | Columella (PET111) |
|-------------|-----------------------------------------------------------------------------------------------------------------------------------------------------------------------------------------------------------------------------------------------------------|--------------------|--------------------------|-----------------|-----------------------------|-------------------|--------------------|
|             | cytoplasmic, putative / citrate hydrolyase/aconitase, putative   chr2:2141588-2146347 FORWARD                                                                                                                                                             |                    |                          |                 |                             |                   |                    |
| AT2G05990.1 | Symbols: ENR1, MOD1   MOD1 (MOSAIC DEATH 1); enoyl-[acyl-carrier-protein] reductase (NADH)/ oxidoreductase   chr2:2322873-2324864 FORWARD                                                                                                                 | 4.7194             | 4.7455                   | 4.9988          | 4.8283                      | 4.6922            | 4.5987             |
| AT2G07050.1 | CAS1 (CYCLOARTENOL SYNTHASE 1)                                                                                                                                                                                                                            | 4.0729             | 4.1524                   | 4.3671          | 4.24                        | 4.1678            | 4.0075             |
| AT2G07698.1 | ATP synthase alpha chain, mitochondrial, putative                                                                                                                                                                                                         | 4.5565             | 4.4797                   | 3.9055          | 3.9364                      | 4.2092            | 4.1492             |
| AT2G07707.1 | Identical to Hypothetical protein ymf19 (ORFB) (YMF19) [Arabidopsis Thaliana] (GB:P93303;GB:Q4PL89); similar to Hypothetical protein ymf19 (ORF158) (GB:Q03152); contains InterPro domain ATPase, F0 complex, subunit 8, mitochondrial, plant; (InterPro: | 4.6499             | 4.6902                   | 4.6341          | 4.5405                      | 4.5812            | 4.5868             |
| AT2G14720.1 | VSR-2 (Vacuolar sorting receptor 2); calcium ion binding / peptidase                                                                                                                                                                                      | 4.4456             | 4.5842                   | 4.5067          | 4.5217                      | 4.3922            | 4.4662             |
| AT2G16360.1 | Symbols:   40S ribosomal protein S25 (RPS25A)   chr2:7076713-7077366 REVERSE                                                                                                                                                                              | 4.8567             | 4.9148                   | 5.0151          | 5.1212                      | 5.0741            | 4.8965             |
| AT2G16600.1 | ROC3 (rotamase CyP 3); peptidyl-prolyl cis-trans isomerase                                                                                                                                                                                                | 4.613              | 4.7662                   | 4.7644          | 4.8798                      | 4.8591            | 5.1447             |
| AT2G17720.1 | Symbols:   oxidoreductase, 2OG-Fe(II) oxygenase family protein   chr2:7704595-7706256 FORWARD                                                                                                                                                             | 5.0021             | 4.6061                   | 4.6291          | 4.5376                      | 4.6379            | 4.2928             |
| AT2G18020.1 | EMB2296 (EMBRYO DEFECTIVE 2296); structural constituent of ribosome                                                                                                                                                                                       | 5.2426             | 5.2352                   | 5.2954          | 5.422                       | 5.4429            | 5.1936             |
| AT2G18230.1 | Symbols: AtPPa2   AtPPa2                                                                                                                                                                                                                                  | 3.2731             | 3.4755                   | 3.3495          | 3.6272                      | 3.6346            | 4.5709             |

**Supplementary Tables pertaining to Figure 2**

**Supplementary Table S12. Root cell type proteins quantified by peak-integration proteomics**

Label-free proteomic log intensity values obtained by peak integration for proteins with  $\geq 2$  unique peptides

| Locus       | Annotation                                                                                                                                                            | Root Hairs (COBL9) | Non-Hair Epidermis (WER) | Cortex (CORTEX) | Endodermis/ Quiescent (SCR) | Vasculature (WOL) | Columella (PET111) |
|-------------|-----------------------------------------------------------------------------------------------------------------------------------------------------------------------|--------------------|--------------------------|-----------------|-----------------------------|-------------------|--------------------|
|             | ( <i>Arabidopsis thaliana</i> pyrophosphorylase 2); inorganic diphosphatase/ pyrophosphatase   chr2:7932139-7933560 REVERSE                                           |                    |                          |                 |                             |                   |                    |
| AT2G19750.1 | Symbols:   40S ribosomal protein S30 (RPS30A)   chr2:8522119-8522888 FORWARD                                                                                          | 4.5115             | 4.4117                   | 4.6312          | 4.8641                      | 4.8824            | 4.5344             |
| AT2G20360.1 | catalytic/ coenzyme binding                                                                                                                                           | 4.8233             | 4.8873                   | 4.8168          | 4.7202                      | 4.778             | 4.7487             |
| AT2G20420.1 | succinyl-CoA ligase (GDP-forming) beta-chain, mitochondrial, putative / succinyl-CoA synthetase, beta chain, putative / SCS-beta, putative                            | 5.493              | 5.3984                   | 5.3078          | 5.221                       | 5.3648            | 5.3691             |
| AT2G20530.1 | Symbols: ATPHB6   ATPHB6 (PROHIBITIN 6)   chr2:8842300-8843787 FORWARD; Duplicate proteins: AT2G20530.2                                                               | 4.454              | 4.4949                   | 4.2554          | 4.3848                      | 4.3275            | 4.2249             |
| AT2G21160.1 | translocon-associated protein alpha (TRAP alpha) family protein                                                                                                       | 5.3968             | 5.3386                   | 5.2922          | 5.2152                      | 5.1911            | 5.0368             |
| AT2G21170.1 | Symbols: TIM   TIM (TRIOSEPHOSPHATE ISOMERASE)   chr2:9078128-9080187 REVERSE                                                                                         | 4.4375             | 4.5333                   | 4.5899          | 4.4263                      | 4.3445            | 4.8003             |
| AT2G21390.1 | coatomer protein complex, subunit alpha, putative                                                                                                                     | 4.1564             | 4.2242                   | 4.4437          | 4.3092                      | 4.3379            | 4.4411             |
| AT2G21410.1 | (VACUOLAR PROTON ATPASE A2); ATPase                                                                                                                                   | 4.8539             | 4.8363                   | 4.9183          | 4.67                        | 4.6913            | 4.7379             |
| AT2G21660.1 | ATGRP7 (COLD, CIRCADIAN RHYTHM, AND RNA BINDING 2); RNA binding / double-stranded DNA binding / single-stranded DNA binding                                           | 5.3764             | 5.3356                   | 5.513           | 5.6543                      | 5.6108            | 5.4813             |
| AT2G21870.1 | Symbols:   Identical to Probable ATP synthase 24 kDa subunit, mitochondrial precursor (EC 3.6.3.14) [ <i>Arabidopsis Thaliana</i> ] (GB:Q9SJ12;GB:Q8LBN3); similar to | 5.1717             | 5.1749                   | 5.1299          | 4.9462                      | 4.9356            | 5.0004             |

**Supplementary Tables pertaining to Figure 2**

**Supplementary Table S12. Root cell type proteins quantified by peak-integration proteomics**

Label-free proteomic log intensity values obtained by peak integration for proteins with  $\geq 2$  unique peptides

| Locus       | Annotation                                                                                                                                                                                                                                                   | Root Hairs (COBL9) | Non-Hair Epidermis (WER) | Cortex (CORTEX) | Endodermis/ Quiescent (SCR) | Vasculature (WOL) | Columella (PET111) |
|-------------|--------------------------------------------------------------------------------------------------------------------------------------------------------------------------------------------------------------------------------------------------------------|--------------------|--------------------------|-----------------|-----------------------------|-------------------|--------------------|
|             | hypothetical protein MtrDRAFT_AC155898g5v1 [Medicago truncatula] (GB:ABE87707.1)   chr2:9327536                                                                                                                                                              |                    |                          |                 |                             |                   |                    |
| AT2G22170.1 | lipid-associated family protein                                                                                                                                                                                                                              | 5.0687             | 5.1616                   | 5.2935          | 4.9886                      | 5.0082            | 5.4028             |
| AT2G25980.1 | Symbols:   jacalin lectin family protein   chr2:11084796-11086720 REVERSE                                                                                                                                                                                    | 4.7767             | 5.025                    | 4.2015          | 4.2023                      | 4.3901            | 4.5048             |
| AT2G27030.3 | Symbols: CAM4, ACAM-4   CAM4 (calmodulin 4); calcium ion binding / signal transducer   chr1:24774431-24775785 REVERSE; Duplicate proteins: AT5G37780.1                                                                                                       | 4.6833             | 4.6666                   | 4.6584          | 4.8375                      | 4.7662            | 5.1234             |
| AT2G27710.1 | 60S acidic ribosomal protein P2 (RPP2B)                                                                                                                                                                                                                      | 4.8508             | 4.8521                   | 5.0271          | 5.2105                      | 5.115             | 4.9996             |
| AT2G27730.1 | Symbols:   Identical to Uncharacterized mitochondrial protein At2g27730 [Arabidopsis Thaliana] (GB:Q9ZUX4;GB:Q8LBD1); similar to hypothetical protein [Vitis vinifera] (GB:CAN62125.1); similar to unnamed protein product [Vitis vinifera] (GB:CAO48731.1); | 5.0473             | 4.9905                   | 4.9249          | 4.809                       | 4.7963            | 4.6357             |
| AT2G27860.1 | AXS1 (UDP-D-APIOSE/UDP-D-XYLOSE SYNTHASE 1)                                                                                                                                                                                                                  | 4.0347             | 3.9441                   | 4.1922          | 4.3391                      | 4.2712            | 4.321              |
| AT2G28000.1 | CPN60A (chloroplast / 60 kDa chaperonin alpha subunit); ATP binding / protein binding / unfolded protein binding                                                                                                                                             | 5.2885             | 5.2846                   | 5.3103          | 5.2584                      | 5.2647            | 5.1384             |
| AT2G29550.1 | Symbols: TUB7   TUB7; structural constituent of cytoskeleton   chr2:12644258-12645932 REVERSE                                                                                                                                                                | 3.9376             | 4.1862                   | 4.2623          | 4.481                       | 4.3263            | 4.1965             |
| AT2G30200.1 | Symbols:   binding / catalytic/ transferase   chr2:12883340-                                                                                                                                                                                                 | 4.3596             | 4.3729                   | 4.4217          | 4.4006                      | 4.3784            | 4.2338             |

**Supplementary Tables pertaining to Figure 2**

**Supplementary Table S12. Root cell type proteins quantified by peak-integration proteomics**

Label-free proteomic log intensity values obtained by peak integration for proteins with  $\geq 2$  unique peptides

| Locus       | Annotation                                                                                                                                                                                                                                                     | Root Hairs (COBL9) | Non-Hair Epidermis (WER) | Cortex (CORTEX) | Endodermis/ Quiescent (SCR) | Vasculature (WOL) | Columella (PET111) |
|-------------|----------------------------------------------------------------------------------------------------------------------------------------------------------------------------------------------------------------------------------------------------------------|--------------------|--------------------------|-----------------|-----------------------------|-------------------|--------------------|
|             | 12885482 REVERSE                                                                                                                                                                                                                                               |                    |                          |                 |                             |                   |                    |
| AT2G30490.1 | Symbols: ATC4H, C4H, CYP73A5   ATC4H (CINNAMATE-4-HYDROXYLASE)   chr2:13000938-13002760 REVERSE                                                                                                                                                                | 3.8467             | 3.9516                   | 4.6679          | 4.1431                      | 4.1294            | 3.9353             |
| AT2G30860.1 | ATGSTF9 (Arabidopsis thaliana Glutathione S-transferase (class phi 9); glutathione transferase                                                                                                                                                                 | 4.4767             | 4.8856                   | 5.0045          | 5.2214                      | 4.8722            | 5.5216             |
| AT2G30970.1 | Symbols: ASP1   ASP1 (ASPARTATE AMINOTRANSFERASE 1)   chr2:13186089-13188763 FORWARD                                                                                                                                                                           | 4.4746             | 4.4891                   | 4.4235          | 4.2028                      | 4.3273            | 4.2792             |
| AT2G31390.1 | pfkB-type carbohydrate kinase family protein                                                                                                                                                                                                                   | 4.5078             | 4.6801                   | 4.8838          | 4.9388                      | 4.7695            | 5.0982             |
| AT2G31610.1 | 40S ribosomal protein S3 (RPS3A)                                                                                                                                                                                                                               | 5.1926             | 5.2646                   | 5.3064          | 5.4885                      | 5.4381            | 5.2642             |
| AT2G32060.1 | Symbols:   40S ribosomal protein S12 (RPS12C)   chr2:13646305-13647181 REVERSE                                                                                                                                                                                 | 4.1252             | 4.139                    | 4.306           | 4.604                       | 4.5095            | 4.3075             |
| AT2G33040.1 | ATP synthase gamma chain, mitochondrial (ATPC)                                                                                                                                                                                                                 | 5.3631             | 5.386                    | 5.3075          | 5.2667                      | 5.1975            | 5.2353             |
| AT2G33150.1 | PED1 (PEROXISOME DEFECTIVE 1); acetyl-CoA C-acyltransferase                                                                                                                                                                                                    | 5.1306             | 5.1322                   | 5.0595          | 4.8156                      | 4.9201            | 5.3018             |
| AT2G33210.1 | chaperonin, putative                                                                                                                                                                                                                                           | 5.3523             | 5.2495                   | 5.2044          | 5.1726                      | 5.1828            | 5.0186             |
| AT2G33220.1 | Symbols:   FUNCTIONS IN: molecular_function unknown; INVOLVED IN: photorespiration; LOCATED IN: mitochondrion, mitochondrial membrane, plastid, respiratory chain complex I; EXPRESSED IN: 25 plant structures; EXPRESSED DURING: 15 growth stages; CONTAINS I | 4.6539             | 4.686                    | 4.6229          | 4.534                       | 4.541             | 4.5811             |
| AT2G33730.1 | Symbols:   DEAD box RNA helicase, putative   chr2:14265679-14267880                                                                                                                                                                                            | 4.0651             | 4.0163                   | 4.0274          | 3.9308                      | 4.0571            | 3.8455             |

**Supplementary Tables pertaining to Figure 2**

**Supplementary Table S12. Root cell type proteins quantified by peak-integration proteomics**

Label-free proteomic log intensity values obtained by peak integration for proteins with  $\geq 2$  unique peptides

| Locus       | Annotation                                                                                                                                       | Root Hairs (COBL9) | Non-Hair Epidermis (WER) | Cortex (CORTEX) | Endodermis/ Quiescent (SCR) | Vasculature (WOL) | Columella (PET111) |
|-------------|--------------------------------------------------------------------------------------------------------------------------------------------------|--------------------|--------------------------|-----------------|-----------------------------|-------------------|--------------------|
|             | REVERSE                                                                                                                                          |                    |                          |                 |                             |                   |                    |
| AT2G34250.1 | Symbols:   protein transport protein sec61, putative   chr2:14462635-14464572 FORWARD; Duplicate proteins: AT2G34250.2                           | 5.1957             | 5.1431                   | 5.0984          | 4.9878                      | 5.0094            | 4.9107             |
| AT2G34480.1 | 60S ribosomal protein L18A (RPL18aB)                                                                                                             | 4.5096             | 4.4775                   | 4.6301          | 4.7982                      | 4.678             | 4.5161             |
| AT2G35605.1 | Symbols:   SWIB complex BAF60b domain-containing protein   chr2:14946161-14947027 FORWARD                                                        | 4.7187             | 4.6519                   | 4.4563          | 4.5714                      | 4.6485            | 4.5013             |
| AT2G36160.1 | 40S ribosomal protein S14 (RPS14A)                                                                                                               | 4.5601             | 4.5064                   | 4.6799          | 4.7777                      | 4.8026            | 4.5889             |
| AT2G36460.1 | Symbols:   fructose-bisphosphate aldolase, putative   chr2:15304008-15305466 REVERSE                                                             | 5.4599             | 5.4291                   | 5.6665          | 5.7777                      | 5.6612            | 5.5897             |
| AT2G36530.1 | LOS2 (Low expression of osmotically responsive genes 1); phosphopyruvate hydratase                                                               | 5.2833             | 5.2727                   | 5.549           | 5.7399                      | 5.6265            | 5.5763             |
| AT2G36620.1 | Symbols: RPL24B, RPL24, STV1   STV1 (SHORT VALVE1); structural constituent of ribosome   chr3:19671727-19672890 REVERSE                          | 4.9965             | 4.9872                   | 5.063           | 5.2849                      | 5.265             | 5.0579             |
| AT2G36880.1 | MAT3 (METHIONINE ADENOSYLTRANSFERASE 3); methionine adenosyltransferase                                                                          | 4.4394             | 4.714                    | 4.8883          | 4.9006                      | 4.6952            | 4.5134             |
| AT2G37270.1 | ATRPS5B (RIBOSOMAL PROTEIN 5B); structural constituent of ribosome                                                                               | 5.0103             | 5.093                    | 4.9782          | 5.2392                      | 5.2076            | 4.9828             |
| AT2G38040.1 | Symbols: CAC3   CAC3 (acetyl co-enzyme A carboxylase carboxyltransferase alpha subunit); acetyl-CoA carboxylase   chr2:15924690-15927827 FORWARD | 4.3097             | 4.383                    | 4.5288          | 4.433                       | 4.2342            | 4.1345             |
| AT2G38750.1 | Symbols: ANNAT4   ANNAT4 (ANNEXIN 4, ANNEXIN ARABIDOPSIS 4); calcium ion binding                                                                 | 5.1136             | 5.1967                   | 4.3326          | 3.9249                      | 4.6725            | 4.0714             |



**Supplementary Tables pertaining to Figure 2**

**Supplementary Table S12. Root cell type proteins quantified by peak-integration proteomics**

Label-free proteomic log intensity values obtained by peak integration for proteins with  $\geq 2$  unique peptides

| Locus       | Annotation                                                                                                                                                                                                      | Root Hairs (COBL9) | Non-Hair Epidermis (WER) | Cortex (CORTEX) | Endodermis/ Quiescent (SCR) | Vasculature (WOL) | Columella (PET111) |
|-------------|-----------------------------------------------------------------------------------------------------------------------------------------------------------------------------------------------------------------|--------------------|--------------------------|-----------------|-----------------------------|-------------------|--------------------|
|             | / calcium-dependent phospholipid binding   chr2:16203660-16205509 REVERSE                                                                                                                                       |                    |                          |                 |                             |                   |                    |
| AT2G39460.1 | Symbols: ATRPL23A, RPL23A, RPL23AA   RPL23AA (RIBOSOMAL PROTEIN L23AA); RNA binding / nucleotide binding / structural constituent of ribosome   chr2:16475049-16475904 FORWARD; Duplicate proteins: AT2G39460.2 | 5.002              | 4.9818                   | 5.0707          | 5.2152                      | 5.2035            | 5.0003             |
| AT2G39800.1 | Symbols: P5CS1, ATP5CS   P5CS1 (DELTA1-PYRROLINE-5-CARBOXYLATE SYNTHASE 1); delta1-pyrroline-5-carboxylate synthetase   chr2:16598516-16602939 REVERSE                                                          | 3.2499             | 3.2953                   | 4.2227          | 3.8961                      | 3.4994            | 3.2284             |
| AT2G40510.1 | Symbols:   40S ribosomal protein S26 (RPS26A)   chr2:16925584-16926701 FORWARD                                                                                                                                  | 4.9703             | 4.9714                   | 5.1174          | 5.2796                      | 5.2553            | 5.1347             |
| AT2G41840.1 | Symbols: XW6   XW6; structural constituent of ribosome   chr1:21689115-21690085 FORWARD                                                                                                                         | 4.8556             | 4.907                    | 4.927           | 5.1642                      | 5.1242            | 4.8918             |
| AT2G42100.1 | Symbols:   actin, putative   chr2:17567289-17569023 FORWARD                                                                                                                                                     | 4.1304             | 3.9842                   | 4.0795          | 3.9631                      | 4.0827            | 4.0595             |
| AT2G42210.2 | Symbols: ATOEP16-3, OEP16-3   mitochondrial import inner membrane translocase subunit Tim17/Tim22/Tim23 family protein   chr2:17590600-17591591 FORWARD                                                         | 4.8924             | 4.9143                   | 4.8142          | 4.7672                      | 4.7939            | 4.7207             |
| AT2G43090.1 | Symbols:   aconitase C-terminal domain-containing protein   chr2:17926034-17926789 FORWARD                                                                                                                      | 4.6848             | 4.7237                   | 4.6896          | 4.5592                      | 4.6201            | 4.7079             |
| AT2G43535.1 | Symbols:   trypsin inhibitor, putative   chr2:18078207-18078637 FORWARD                                                                                                                                         | 4.1544             | 4.8705                   | 3.9495          | 3.57                        | 3.4676            | 4.8485             |

**Supplementary Tables pertaining to Figure 2**

**Supplementary Table S12. Root cell type proteins quantified by peak-integration proteomics**

Label-free proteomic log intensity values obtained by peak integration for proteins with  $\geq 2$  unique peptides

| Locus       | Annotation                                                                                                                                                                                                                     | Root Hairs (COBL9) | Non-Hair Epidermis (WER) | Cortex (CORTEX) | Endodermis/ Quiescent (SCR) | Vasculature (WOL) | Columella (PET111) |
|-------------|--------------------------------------------------------------------------------------------------------------------------------------------------------------------------------------------------------------------------------|--------------------|--------------------------|-----------------|-----------------------------|-------------------|--------------------|
| AT2G43610.1 | Symbols:   glycoside hydrolase family 19 protein   chr2:18088058-18089184 REVERSE                                                                                                                                              | 3.004              | 3.649                    | 2.6684          | 3.1517                      | 2.8679            | 3.6161             |
| AT2G44790.1 | UCC2 (UCLACYANIN 2); copper ion binding                                                                                                                                                                                        | 4.4538             | 4.28                     | 4.6034          | 4.7585                      | 4.527             | 4.2034             |
| AT2G45740.1 | Symbols: PEX11C   PEX11C (PEROXIN 11C)   chr1:296213-297723 REVERSE                                                                                                                                                            | 4.4388             | 4.5927                   | 4.6147          | 4.3525                      | 4.232             | 4.8222             |
| AT2G47470.1 | Symbols: ATPDIL2-1, UNE5, MEE30, PDI11, ATPDI11   UNE5 (UNFERTILIZED EMBRYO SAC 5); protein disulfide isomerase   chr2:19481503-19483683 FORWARD                                                                               | 5.4676             | 5.3934                   | 5.3784          | 5.365                       | 5.3089            | 5.5573             |
| AT2G47510.1 | FUM1 (FUMARASE 1); fumarate hydratase                                                                                                                                                                                          | 4.0259             | 3.9991                   | 3.9059          | 3.8645                      | 3.8369            | 3.7587             |
| AT3G01280.1 | porin, putative                                                                                                                                                                                                                | 5.747              | 5.8046                   | 5.7006          | 5.7013                      | 5.6453            | 5.5641             |
| AT3G01390.1 | VMA10 (VACUOLAR MEMBRANE ATPASE 10)                                                                                                                                                                                            | 4.7619             | 4.7414                   | 4.7112          | 4.5846                      | 4.566             | 4.8521             |
| AT3G02090.1 | MPPBETA; metalloendopeptidase                                                                                                                                                                                                  | 5.8455             | 5.852                    | 5.7469          | 5.6936                      | 5.7102            | 5.6846             |
| AT3G02230.1 | RGP1 (REVERSIBLY GLYCOSYLATED POLYPEPTIDE 1)                                                                                                                                                                                   | 4.9919             | 4.8057                   | 4.902           | 4.9072                      | 4.9681            | 5.055              |
| AT3G02530.1 | chaperonin, putative                                                                                                                                                                                                           | 3.7203             | 3.6968                   | 3.9781          | 4.1774                      | 4.1933            | 4.0086             |
| AT3G02630.1 | acyl-(acyl-carrier-protein) desaturase, putative / stearoyl-ACP desaturase, putative                                                                                                                                           | 4.3966             | 4.4878                   | 4.5704          | 4.4928                      | 4.3467            | 4.4607             |
| AT3G02780.1 | Symbols: IPP2, IPIAT1, IDI2   IDI2/IPIAT1/IPP2 (ISOPENTENYL DIPHOSPHATE ISOMERASE 2, ISOPENTENYL PYROPHOSPHATE:DIMETHYLLALLYL PYROPHOSPHATE ISOMERASE 2); isopentenyl-diphosphate delta-isomerase   chr3:602585-604655 REVERSE | 4.0008             | 3.9799                   | 4.1638          | 4.1604                      | 4.1365            | 4.3256             |

**Supplementary Tables pertaining to Figure 2**

**Supplementary Table S12. Root cell type proteins quantified by peak-integration proteomics**

Label-free proteomic log intensity values obtained by peak integration for proteins with  $\geq 2$  unique peptides

| Locus       | Annotation                                                                                                                                                                                                                                                    | Root Hairs (COBL9) | Non-Hair Epidermis (WER) | Cortex (CORTEX) | Endodermis/ Quiescent (SCR) | Vasculature (WOL) | Columella (PET111) |
|-------------|---------------------------------------------------------------------------------------------------------------------------------------------------------------------------------------------------------------------------------------------------------------|--------------------|--------------------------|-----------------|-----------------------------|-------------------|--------------------|
| AT3G03780.1 | AtMS2 (Arabidopsis thaliana methionine synthase 2); 5-methyltetrahydropteroyltriglutamate-homocysteine S-methyltransferase                                                                                                                                    | 5.452              | 5.4967                   | 5.7159          | 5.7985                      | 5.7333            | 5.8861             |
| AT3G03960.1 | chaperonin, putative                                                                                                                                                                                                                                          | 4.3701             | 4.4418                   | 4.4568          | 4.6892                      | 4.6379            | 4.5256             |
| AT3G04120.1 | GAPC (GLYCERALDEHYDE-3-PHOSPHATE DEHYDROGENASE C SUBUNIT); glyceraldehyde-3-phosphate dehydrogenase                                                                                                                                                           | 4.6678             | 4.5824                   | 4.7637          | 4.9271                      | 4.7032            | 4.7936             |
| AT3G04840.1 | 40S ribosomal protein S3A (RPS3aA)                                                                                                                                                                                                                            | 4.923              | 4.9337                   | 4.918           | 5.2009                      | 5.1918            | 4.9543             |
| AT3G05020.1 | ACP1 (ACYL CARRIER PROTEIN 1)                                                                                                                                                                                                                                 | 5.2945             | 5.305                    | 5.4908          | 5.4405                      | 5.2695            | 5.0172             |
| AT3G05560.1 | 60S ribosomal protein L22-2 (RPL22B)                                                                                                                                                                                                                          | 5.0878             | 5.0859                   | 5.1322          | 5.1463                      | 5.0521            | 4.9845             |
| AT3G05590.1 | RPL18 (RIBOSOMAL PROTEIN L18); structural constituent of ribosome                                                                                                                                                                                             | 5.1825             | 5.1476                   | 5.2053          | 5.4258                      | 5.4333            | 5.1747             |
| AT3G06300.1 | Symbols: AT-P4H-2   AT-P4H-2 (A. THALIANA P4H ISOFORM 2); oxidoreductase, acting on paired donors, with incorporation or reduction of molecular oxygen, 2-oxoglutarate as one donor, and incorporation of one atom each of oxygen into both donors / procolla | 4.7894             | 4.4161                   | 4.2912          | 4.2111                      | 4.4467            | 3.9979             |
| AT3G06860.1 | MFP2 (MULTIFUNCTIONAL PROTEIN); enoyl-CoA hydratase                                                                                                                                                                                                           | 4.0015             | 3.9532                   | 3.846           | 3.6598                      | 3.8333            | 4.2926             |
| AT3G07770.1 | Symbols:   ATP binding   chr3:2479617-2483976 FORWARD                                                                                                                                                                                                         | 4.567              | 4.476                    | 4.2387          | 4.3247                      | 4.2677            | 4.0243             |
| AT3G08580.1 | AAC1 (ADP/ATP CARRIER 1); ATP:ADP antiporter/ binding                                                                                                                                                                                                         | 5.9422             | 5.9418                   | 5.8863          | 5.8363                      | 5.7693            | 5.7975             |
| AT3G09200.1 | 60S acidic ribosomal protein P0 (RPP0B)                                                                                                                                                                                                                       | 5.3473             | 5.3242                   | 5.4664          | 5.6316                      | 5.6232            | 5.4354             |
| AT3G09260.1 | PYK10 (phosphate starvation-response 3.1); hydrolase, hydrolyzing O-glycosyl compounds                                                                                                                                                                        | 6.1616             | 6.2885                   | 5.4886          | 5.3711                      | 5.8827            | 6.0015             |

**Supplementary Tables pertaining to Figure 2**

**Supplementary Table S12. Root cell type proteins quantified by peak-integration proteomics**

Label-free proteomic log intensity values obtained by peak integration for proteins with  $\geq 2$  unique peptides

| Locus       | Annotation                                                                                                  | Root Hairs (COBL9) | Non-Hair Epidermis (WER) | Cortex (CORTEX) | Endodermis/ Quiescent (SCR) | Vasculature (WOL) | Columella (PET111) |
|-------------|-------------------------------------------------------------------------------------------------------------|--------------------|--------------------------|-----------------|-----------------------------|-------------------|--------------------|
| AT3G09440.1 | heat shock cognate 70 kDa protein 3 (HSC70-3) (HSP70-3)                                                     | 4.6749             | 4.6095                   | 4.6888          | 4.6688                      | 4.7628            | 4.7725             |
| AT3G09630.1 | Symbols:   60S ribosomal protein L4/L1 (RPL4A)   chr3:2953818-2955449 FORWARD                               | 5.007              | 5                        | 4.9952          | 5.2103                      | 5.1781            | 5.0169             |
| AT3G09680.1 | Symbols:   40S ribosomal protein S23 (RPS23B)   chr5:693278-694394 REVERSE                                  | 4.7311             | 4.7191                   | 4.8585          | 5.0996                      | 5.0144            | 4.7837             |
| AT3G09820.1 | ADK1 (ADENOSINE KINASE 1)                                                                                   | 4.4109             | 4.4406                   | 4.5619          | 4.7175                      | 4.6819            | 4.5432             |
| AT3G09840.1 | CDC48 (CELL DIVISION CYCLE 48); ATPase                                                                      | 4.6297             | 4.6245                   | 4.7774          | 4.9173                      | 4.9194            | 4.9818             |
| AT3G10090.1 | 40S ribosomal protein S28 (RPS28A)                                                                          | 4.5493             | 4.6105                   | 4.8105          | 4.9296                      | 4.884             | 4.757              |
| AT3G10370.1 | Symbols: SDP6   SDP6 (SUGAR-DEPENDENT 6); glycerol-3-phosphate dehydrogenase   chr3:3216502-3219027 FORWARD | 3.7075             | 3.6736                   | 3.4259          | 3.2406                      | 3.5349            | 3.6771             |
| AT3G11130.1 | clathrin heavy chain, putative                                                                              | 4.3704             | 4.2747                   | 4.4342          | 4.396                       | 4.3538            | 4.4011             |
| AT3G11250.1 | 60S acidic ribosomal protein P0 (RPP0C)                                                                     | 4.0284             | 4.0735                   | 4.2471          | 4.2876                      | 4.2108            | 3.9583             |
| AT3G11830.1 | chaperonin, putative                                                                                        | 4.0768             | 4.1694                   | 4.3164          | 4.5326                      | 4.4695            | 4.2993             |
| AT3G12580.1 | HSP70 (heat shock protein 70); ATP binding                                                                  | 4.4765             | 4.4086                   | 4.538           | 4.5068                      | 4.5777            | 4.4892             |
| AT3G12780.1 | PGK1 (PHOSPHOGLYCERATE KINASE 1); phosphoglycerate kinase                                                   | 4.2843             | 4.3436                   | 4.6534          | 4.4609                      | 4.3546            | 4.5626             |
| AT3G13860.1 | chaperonin, putative                                                                                        | 4.6321             | 4.541                    | 4.4083          | 4.3689                      | 4.4366            | 4.4217             |
| AT3G13870.1 | RHD3 (ROOT HAIR DEFECTIVE 3)                                                                                | 4.6401             | 4.5249                   | 4.426           | 4.3423                      | 4.3335            | 4.4839             |
| AT3G13920.1 | EIF4A1 (eukaryotic translation initiation factor 4A-1); ATP-dependent helicase                              | 5.3863             | 5.4692                   | 5.5585          | 5.5498                      | 5.5456            | 5.4142             |
| AT3G13930.1 | Symbols:   dihydrolipoamide S-acetyltransferase, putative   chr3:4596247-4600150 FORWARD                    | 5.1271             | 5.0705                   | 5.0596          | 4.9264                      | 4.9908            | 5.0276             |
| AT3G14990.1 | Symbols:   4-methyl-5(b-                                                                                    | 3.5112             | 3.8125                   | 4.0581          | 4.2327                      | 4.1698            | 4.9944             |

**Supplementary Tables pertaining to Figure 2**

**Supplementary Table S12. Root cell type proteins quantified by peak-integration proteomics**

Label-free proteomic log intensity values obtained by peak integration for proteins with  $\geq 2$  unique peptides

| Locus       | Annotation                                                                                                                                                                                                                                                | Root Hairs (COBL9) | Non-Hair Epidermis (WER) | Cortex (CORTEX) | Endodermis/ Quiescent (SCR) | Vasculature (WOL) | Columella (PET111) |
|-------------|-----------------------------------------------------------------------------------------------------------------------------------------------------------------------------------------------------------------------------------------------------------|--------------------|--------------------------|-----------------|-----------------------------|-------------------|--------------------|
|             | hydroxyethyl)-thiazole monophosphate biosynthesis protein, putative   chr3:5047510-5049621 FORWARD                                                                                                                                                        |                    |                          |                 |                             |                   |                    |
| AT3G15000.1 | Identical to Unknown mitochondrial protein At3g15000 [Arabidopsis Thaliana] (GB:Q9LKA5); similar to unknown protein [Arabidopsis thaliana] (TAIR:AT1G53260.1); similar to Os09g0509000 [Oryza sativa (japonica cultivar-group)] (GB:NP_001063625.1); simi | 4.9187             | 4.9095                   | 4.7901          | 4.8011                      | 4.9231            | 4.6631             |
| AT3G15020.1 | malate dehydrogenase (NAD), mitochondrial, putative                                                                                                                                                                                                       | 5.5452             | 5.4912                   | 5.4518          | 5.3591                      | 5.4737            | 5.509              |
| AT3G15730.1 | Symbols: PLD, PLDALPHA1   PLDALPHA1 (PHOSPHOLIPASE D ALPHA 1); phospholipase D   chr3:5330842-5333481 FORWARD                                                                                                                                             | 3.7714             | 3.6665                   | 3.8443          | 3.8962                      | 3.7938            | 4.2931             |
| AT3G15950.1 | Symbols:   (TSA1-LIKE); unknown protein   chr3:5397789-5402616 REVERSE                                                                                                                                                                                    | 6.0657             | 5.9345                   | 5.1331          | 5.0702                      | 5.5965            | 5.5535             |
| AT3G16410.1 | Symbols:   jacalin lectin family protein   chr3:5572151-5574365 FORWARD                                                                                                                                                                                   | 5.1239             | 5.318                    | 4.533           | 4.4454                      | 4.7804            | 4.9839             |
| AT3G16420.1 | PBP1 (PYK10-BINDING PROTEIN 1)                                                                                                                                                                                                                            | 5.4951             | 5.5968                   | 5.005           | 4.9619                      | 5.1392            | 5.7362             |
| AT3G16460.1 | jacalin lectin family protein                                                                                                                                                                                                                             | 6.1121             | 6.1421                   | 5.2974          | 5.2755                      | 5.625             | 5.8886             |
| AT3G16480.1 | MPPALPHA (mitochondrial processing peptidase alpha subunit); metalloendopeptidase                                                                                                                                                                         | 4.754              | 4.774                    | 4.7212          | 4.6037                      | 4.5373            | 4.5259             |
| AT3G17240.1 | LPD2 (LIPOAMIDE DEHYDROGENASE 2); FAD binding / dihydrolipoyl dehydrogenase/ disulfide oxidoreductase/ oxidoreductase                                                                                                                                     | 4.8004             | 4.6925                   | 4.7045          | 4.6127                      | 4.6907            | 4.7509             |
| AT3G17390.1 | MTO3 (S-adenosylmethionine synthase 3); methionine                                                                                                                                                                                                        | 5.3861             | 5.5389                   | 5.6434          | 5.6138                      | 5.5871            | 5.461              |

**Supplementary Tables pertaining to Figure 2**

**Supplementary Table S12. Root cell type proteins quantified by peak-integration proteomics**

Label-free proteomic log intensity values obtained by peak integration for proteins with  $\geq 2$  unique peptides

| Locus       | Annotation                                                                                                                                                                   | Root Hairs (COBL9) | Non-Hair Epidermis (WER) | Cortex (CORTEX) | Endodermis/ Quiescent (SCR) | Vasculature (WOL) | Columella (PET111) |
|-------------|------------------------------------------------------------------------------------------------------------------------------------------------------------------------------|--------------------|--------------------------|-----------------|-----------------------------|-------------------|--------------------|
|             | adenosyltransferase                                                                                                                                                          |                    |                          |                 |                             |                   |                    |
| AT3G17810.1 | Symbols:   dihydroorotate dehydrogenase family protein / dihydroorotate oxidase family protein   chr3:6094285-6096295 FORWARD                                                | 4.3236             | 4.3639                   | 4.3315          | 4.1861                      | 4.1545            | 4.5406             |
| AT3G18000.1 | Symbols: XIPOTL1, PEAMT, NMT1   NMT1 (N-METHYLTRANSFERASE 1); phosphoethanolamine N-methyltransferase   chr3:6154584-6157337 FORWARD                                         | 3.9431             | 4.0984                   | 4.6957          | 4.4883                      | 4.2225            | 4.4926             |
| AT3G18130.1 | guanine nucleotide-binding family protein / activated protein kinase C receptor (RACK1)                                                                                      | 4.2937             | 4.349                    | 4.4611          | 4.6508                      | 4.5746            | 4.2999             |
| AT3G18190.1 | chaperonin, putative                                                                                                                                                         | 4.4387             | 4.5279                   | 4.6778          | 4.8599                      | 4.8636            | 4.6418             |
| AT3G18780.2 | Symbols: DER1, LSR2, ENL2, ACT2   ACT2 (ACTIN 2); structural constituent of cytoskeleton   chr3:6475541-6476838 FORWARD                                                      | 5.6561             | 5.3042                   | 5.5148          | 5.5106                      | 5.6992            | 5.3024             |
| AT3G19820.1 | DWF1 (DIMINUTO 1); catalytic                                                                                                                                                 | 5.7369             | 5.7698                   | 5.9862          | 5.8156                      | 5.6221            | 5.4318             |
| AT3G20000.1 | TOM40 (translocase of the outer mitochondrial membrane 40); voltage-gated ion-selective channel                                                                              | 4.9937             | 5.0125                   | 4.9129          | 4.9045                      | 4.8835            | 4.8013             |
| AT3G20050.1 | Symbols: ATTCP-1   ATTCP-1 (Arabidopsis thaliana T-complex protein 1 alpha subunit); ATP binding / protein binding / unfolded protein binding   chr3:6998550-7002272 REVERSE | 3.9372             | 4.0782                   | 4.1769          | 4.4782                      | 4.5947            | 4.3751             |
| AT3G20370.1 | Symbols:   meprin and TRAF homology domain-containing protein / MATH domain-containing protein   chr3:7105487-7107085 FORWARD                                                | 5.1122             | 4.8314                   | 4.0459          | 3.8266                      | 4.5114            | 4.7024             |
| AT3G22200.1 | Symbols: POP2, GABA-T, HER1   POP2 (POLLEN-PISTIL                                                                                                                            | 4.4365             | 4.3276                   | 4.1881          | 4.0101                      | 4.1732            | 4.6819             |

**Supplementary Tables pertaining to Figure 2**

**Supplementary Table S12. Root cell type proteins quantified by peak-integration proteomics**

Label-free proteomic log intensity values obtained by peak integration for proteins with  $\geq 2$  unique peptides

| Locus       | Annotation                                                                                                                                        | Root Hairs (COBL9) | Non-Hair Epidermis (WER) | Cortex (CORTEX) | Endodermis/ Quiescent (SCR) | Vasculature (WOL) | Columella (PET111) |
|-------------|---------------------------------------------------------------------------------------------------------------------------------------------------|--------------------|--------------------------|-----------------|-----------------------------|-------------------|--------------------|
|             | INCOMPATIBILITY 2); 4-aminobutyrate transaminase/ 4-aminobutyrate:pyruvate transaminase   chr3:7835286-7838863 FORWARD                            |                    |                          |                 |                             |                   |                    |
| AT3G22790.1 | Symbols:   kinase interacting family protein   chr3:8052446-8057888 REVERSE                                                                       | 4.1676             | 4.0954                   | 4.3498          | 4.4651                      | 4.4457            | 4.1944             |
| AT3G22960.1 | Symbols:   pyruvate kinase, putative   chr3:8139376-8141778 FORWARD                                                                               | 4.5401             | 4.5646                   | 4.7703          | 4.6696                      | 4.5142            | 4.4899             |
| AT3G23990.1 | HSP60 (Heat shock protein 60); ATP binding / protein binding / unfolded protein binding                                                           | 5.8109             | 5.7646                   | 5.6665          | 5.6175                      | 5.6417            | 5.6391             |
| AT3G25860.1 | LTA2 (PLASTID E2 SUBUNIT OF PYRUVATE DECARBOXYLASE); dihydrolipoyllysine-residue acetyltransferase                                                | 5.1489             | 5.1783                   | 5.3634          | 5.2945                      | 5.1158            | 5.0308             |
| AT3G27240.1 | Symbols:   cytochrome c1, putative   chr3:10057381-10059607 REVERSE                                                                               | 4.5913             | 4.6229                   | 4.5959          | 4.4873                      | 4.5814            | 4.5106             |
| AT3G42050.1 | Symbols:   vacuolar ATP synthase subunit H family protein   chr3:14239832-14243214 REVERSE                                                        | 4.8446             | 4.7727                   | 4.814           | 4.6928                      | 4.7037            | 4.7862             |
| AT3G43980.1 | Symbols:   40S ribosomal protein S29 (RPS29A)   chr3:15778555-15779235 REVERSE; Duplicate proteins: AT3G44010.1,AT4G33865.1                       | 3.8741             | 3.8449                   | 3.8862          | 3.9157                      | 3.9238            | 3.8418             |
| AT3G44110.1 | Symbols: ATJ, ATJ3   ATJ3 (Arabidopsis thaliana DnaJ homologue 3)   chr3:15880102-15882046 REVERSE                                                | 4.6584             | 4.5435                   | 4.7726          | 4.7446                      | 4.6781            | 4.459              |
| AT3G44330.1 | similar to PREDICTED: similar to nicalin [Tribolium castaneum] (GB:XP_971811.1); similar to Os08g0102100 [Oryza sativa (japonica cultivar-group)] | 4.8023             | 4.7689                   | 4.8324          | 4.6998                      | 4.6984            | 4.5755             |

**Supplementary Tables pertaining to Figure 2**

**Supplementary Table S12. Root cell type proteins quantified by peak-integration proteomics**

Label-free proteomic log intensity values obtained by peak integration for proteins with  $\geq 2$  unique peptides

| Locus       | Annotation                                                                                                                                                                        | Root Hairs (COBL9) | Non-Hair Epidermis (WER) | Cortex (CORTEX) | Endodermis/ Quiescent (SCR) | Vasculature (WOL) | Columella (PET111) |
|-------------|-----------------------------------------------------------------------------------------------------------------------------------------------------------------------------------|--------------------|--------------------------|-----------------|-----------------------------|-------------------|--------------------|
|             | (GB:NP_001060766.1); contains InterPro domain Nicastrin; (InterPro:IPR008710)                                                                                                     |                    |                          |                 |                             |                   |                    |
| AT3G45030.1 | 40S ribosomal protein S20 (RPS20A)                                                                                                                                                | 5.1647             | 5.1658                   | 5.3132          | 5.4458                      | 5.446             | 5.2964             |
| AT3G46040.1 | RPS15AD (ribosomal protein S15A D); structural constituent of ribosome                                                                                                            | 4.4014             | 4.4435                   | 4.4543          | 4.5927                      | 4.4724            | 4.4211             |
| AT3G46430.1 | similar to unknown protein [Arabidopsis thaliana] (TAIR:AT5G59613.1); similar to mitochondrial ATP synthase 6 KD subunit [Oryza sativa (japonica cultivar-group)] (GB:BAB21526.1) | 4.3145             | 4.301                    | 4.1325          | 4.2632                      | 3.999             | 3.8452             |
| AT3G47520.1 | MDH (malate dehydrogenase); malate dehydrogenase                                                                                                                                  | 5.4958             | 5.4767                   | 5.595           | 5.474                       | 5.476             | 5.435              |
| AT3G48000.1 | Symbols: ALDH2, ALDH2B4   ALDH2B4 (ALDEHYDE DEHYDROGENASE 2); 3-chloroallyl aldehyde dehydrogenase/ aldehyde dehydrogenase (NAD)   chr3:17728067-17730828 REVERSE                 | 4.5333             | 4.9012                   | 5.1262          | 4.5337                      | 4.2413            | 5.1701             |
| AT3G48340.1 | Symbols:   cysteine-type peptidase   chr3:17908919-17910059 FORWARD                                                                                                               | 5.3197             | 5.0337                   | 4.0398          | 4.1866                      | 4.7924            | 4.5722             |
| AT3G48870.1 | ATCLPC (CASEINOLYTIC PROTEASE C); ATP binding / ATPase                                                                                                                            | 4.6316             | 4.7102                   | 4.8497          | 4.7602                      | 4.7193            | 4.7503             |
| AT3G48930.1 | EMB1080 (EMBRYO DEFECTIVE 1080); structural constituent of ribosome                                                                                                               | 4.8503             | 4.8714                   | 5.0293          | 5.2007                      | 5.1526            | 4.943              |
| AT3G49010.1 | Symbols: ATBBC1, BBC1, RSU2   ATBBC1 (ARABIDOPSIS THALIANA BREAST BASIC CONSERVED 1); structural constituent of ribosome   chr3:18166971-18168047 REVERSE                         | 4.8492             | 4.8595                   | 4.9253          | 5.0743                      | 5.1014            | 4.8402             |
| AT3G49720.1 | similar to unknown protein [Arabidopsis thaliana]                                                                                                                                 | 5.0195             | 5.0182                   | 4.9533          | 4.7816                      | 4.8745            | 4.811              |



**Supplementary Tables pertaining to Figure 2**

**Supplementary Table S12. Root cell type proteins quantified by peak-integration proteomics**

Label-free proteomic log intensity values obtained by peak integration for proteins with  $\geq 2$  unique peptides

| Locus       | Annotation                                                                                                                                                                                              | Root Hairs (COBL9) | Non-Hair Epidermis (WER) | Cortex (CORTEX) | Endodermis/ Quiescent (SCR) | Vasculature (WOL) | Columella (PET111) |
|-------------|---------------------------------------------------------------------------------------------------------------------------------------------------------------------------------------------------------|--------------------|--------------------------|-----------------|-----------------------------|-------------------|--------------------|
|             | (TAIR:AT5G65810.1); similar to Os01g0144000 [Oryza sativa (japonica cultivar-group)] (GB:NP_001042001.1); similar to conserved hypothetical protein [Medicago truncatula] (GB:ABE78370.1); contains dom |                    |                          |                 |                             |                   |                    |
| AT3G49910.1 | Symbols:   60S ribosomal protein L26 (RPL26A)   chr3:18515296-18515736 FORWARD                                                                                                                          | 4.1579             | 4.172                    | 4.3339          | 4.4869                      | 4.3645            | 4.3128             |
| AT3G51800.1 | Symbols: ATG2   ATG2; aminopeptidase/ metalloexopeptidase   chr3:19211261-19213568 REVERSE                                                                                                              | 3.7834             | 3.8019                   | 3.8363          | 4.2056                      | 4.2568            | 3.9705             |
| AT3G52200.1 | Symbols: LTA3   LTA3 (Dihydrolipoamide S-acetyltransferase 3); dihydrolipoyllysine-residue acetyltransferase   chr3:19371295-19377069 FORWARD                                                           | 4.6468             | 4.5472                   | 4.4784          | 4.3806                      | 4.4196            | 4.5413             |
| AT3G52300.1 | ATP synthase D chain-related                                                                                                                                                                            | 5.4492             | 5.4733                   | 5.4224          | 5.3321                      | 5.3282            | 5.3363             |
| AT3G52580.1 | 40S ribosomal protein S14 (RPS14C)                                                                                                                                                                      | 5.1432             | 5.0862                   | 5.2597          | 5.3923                      | 5.3786            | 5.1303             |
| AT3G52730.1 | Symbols:   ubiquinol-cytochrome C reductase UQCRX/QCR9-like family protein   chr3:19554124-19555145 REVERSE                                                                                             | 4.6371             | 4.6306                   | 4.5251          | 4.4378                      | 4.4527            | 4.2571             |
| AT3G52930.1 | fructose-bisphosphate aldolase, putative                                                                                                                                                                | 5.5683             | 5.5524                   | 5.8128          | 5.8669                      | 5.7527            | 5.6383             |
| AT3G52960.1 | peroxiredoxin type 2, putative                                                                                                                                                                          | 4.9005             | 4.8725                   | 5.0996          | 4.9412                      | 4.8105            | 4.8031             |
| AT3G52990.1 | Symbols:   pyruvate kinase, putative   chr3:19649046-19652237 FORWARD                                                                                                                                   | 4.0785             | 4.0358                   | 4.1614          | 4.2643                      | 4.1787            | 4.1578             |
| AT3G53430.1 | Symbols:   60S ribosomal protein L12 (RPL12B)   chr3:19820873-19821373 REVERSE                                                                                                                          | 5.4739             | 5.4452                   | 5.5971          | 5.6892                      | 5.7109            | 5.4987             |
| AT3G54560.1 | Symbols: HTA9   HTA9 (HISTONE H2A PROTEIN 9); DNA binding                                                                                                                                               | 4.4008             | 4.6521                   | 4.6544          | 4.5218                      | 4.3663            | 4.5634             |

**Supplementary Tables pertaining to Figure 2**

**Supplementary Table S12. Root cell type proteins quantified by peak-integration proteomics**

Label-free proteomic log intensity values obtained by peak integration for proteins with  $\geq 2$  unique peptides

| Locus       | Annotation                                                                                                                                                                          | Root Hairs (COBL9) | Non-Hair Epidermis (WER) | Cortex (CORTEX) | Endodermis/ Quiescent (SCR) | Vasculature (WOL) | Columella (PET111) |
|-------------|-------------------------------------------------------------------------------------------------------------------------------------------------------------------------------------|--------------------|--------------------------|-----------------|-----------------------------|-------------------|--------------------|
|             | chr1:19645409-19646221 FORWARD                                                                                                                                                      |                    |                          |                 |                             |                   |                    |
| AT3G54960.1 | ATPDIL1-3 (PDI-LIKE 1-3); thiol-disulfide exchange intermediate                                                                                                                     | 5.5307             | 5.122                    | 4.9639          | 4.7323                      | 5.0842            | 4.9861             |
| AT3G55360.1 | ATTSC13/CER10/ECR/TSC13 (ENOYL-COA REDUCTASE); 3-oxo-5-alpha-steroid 4-dehydrogenase/ fatty acid elongase/ trans-2-enoyl-CoA reductase (NADPH)                                      | 4.3896             | 4.4377                   | 4.4518          | 4.3359                      | 4.2545            | 4.0549             |
| AT3G55410.1 | Symbols:   2-oxoglutarate dehydrogenase E1 component, putative / oxoglutarate decarboxylase, putative / alpha-ketoglutaric dehydrogenase, putative   chr3:20552874-20556705 FORWARD | 4.9533             | 4.8934                   | 4.7269          | 4.6654                      | 4.7844            | 4.7053             |
| AT3G55440.1 | ATCTIMC (CYTOSOLIC TRIOSE PHOSPHATE ISOMERASE); triose-phosphate isomerase                                                                                                          | 4.7648             | 4.7728                   | 4.9382          | 5.1329                      | 5.0795            | 5.185              |
| AT3G56130.1 | Symbols:   biotin/lipoyl attachment domain-containing protein   chr3:20837831-20839986 FORWARD                                                                                      | 4.1667             | 4.1596                   | 4.2587          | 4.2384                      | 4.0718            | 3.8964             |
| AT3G57010.1 | strictosidine synthase family protein                                                                                                                                               | 4.2169             | 4.4836                   | 4.6949          | 4.9575                      | 4.8002            | 4.5937             |
| AT3G57610.1 | adenylosuccinate synthetase (ADSS)                                                                                                                                                  | 4.4158             | 4.4343                   | 4.5338          | 4.5027                      | 4.3997            | 4.4199             |
| AT3G58610.1 | Symbols:   ketol-acid reductoisomerase   chr3:21682538-21685616 FORWARD                                                                                                             | 5.236              | 5.2361                   | 5.2607          | 5.1631                      | 5.2035            | 5.103              |
| AT3G60750.1 | transketolase, putative                                                                                                                                                             | 5.4188             | 5.3885                   | 5.6072          | 5.406                       | 5.3649            | 5.4938             |
| AT3G60770.1 | 40S ribosomal protein S13 (RPS13A)                                                                                                                                                  | 4.8602             | 4.8762                   | 4.9476          | 5.1277                      | 5.0925            | 4.8806             |
| AT3G61440.1 | ATCYSC1 (BETA-SUBSTITUTED ALA SYNTHASE 3;1); L-3-cyanoalanine synthase/ cysteine synthase                                                                                           | 4.3458             | 4.402                    | 4.6445          | 4.4443                      | 4.2977            | 4.5729             |
| AT3G62360.1 | similar to LOC495699 protein [Xenopus laevis] (GB:AAH86296.1); contains InterPro domain                                                                                             | 5.3191             | 5.2744                   | 5.2936          | 5.1941                      | 5.1984            | 5.0488             |

**Supplementary Tables pertaining to Figure 2**

**Supplementary Table S12. Root cell type proteins quantified by peak-integration proteomics**

Label-free proteomic log intensity values obtained by peak integration for proteins with  $\geq 2$  unique peptides

| Locus       | Annotation                                                                                                                                                                   | Root Hairs (COBL9) | Non-Hair Epidermis (WER) | Cortex (CORTEX) | Endodermis/ Quiescent (SCR) | Vasculature (WOL) | Columella (PET111) |
|-------------|------------------------------------------------------------------------------------------------------------------------------------------------------------------------------|--------------------|--------------------------|-----------------|-----------------------------|-------------------|--------------------|
|             | Carboxypeptidase regulatory region; (InterPro:IPR008969); contains InterPro domain Cna B-type; (InterPro:IPR008454); contains InterPro domain Borrelia outer surf            |                    |                          |                 |                             |                   |                    |
| AT3G62830.1 | Symbols: UXS2, ATUXS2, AUD1   AUD1; UDP-glucuronate decarboxylase/ catalytic/ dTDP-glucose 4,6-dehydratase   chr3:23232539-23235353 FORWARD; Duplicate proteins: AT3G62830.2 | 4.5912             | 4.4251                   | 4.3553          | 4.2445                      | 4.3343            | 4.5807             |
| AT4G00490.1 | Symbols: BAM2, BMY9   BAM2 (BETA-AMYLASE 2); beta-amylase   chr4:222422-224862 FORWARD                                                                                       | 4.0842             | 4.0415                   | 4.0324          | 3.93                        | 3.8331            | 4.6723             |
| AT4G00860.1 | ATOZ11 (Arabidopsis thaliana ozone-induced protein 1)                                                                                                                        | 4.6568             | 4.6419                   | 4.6332          | 4.5827                      | 4.3948            | 4.5688             |
| AT4G01100.1 | mitochondrial substrate carrier family protein                                                                                                                               | 4.9291             | 4.807                    | 4.7611          | 4.7383                      | 4.8193            | 4.4809             |
| AT4G01850.1 | MAT2/SAM-2 (S-adenosylmethionine synthetase 2); methionine adenosyltransferase                                                                                               | 4.8284             | 4.6919                   | 4.658           | 4.8043                      | 4.793             | 4.6068             |
| AT4G02450.1 | Symbols:   glycine-rich protein   chr4:1073987-1075765 REVERSE                                                                                                               | 4.6206             | 4.6874                   | 4.8319          | 5.0508                      | 4.9584            | 4.8488             |
| AT4G02930.1 | elongation factor Tu, putative / EF-Tu, putative                                                                                                                             | 5.1353             | 5.0099                   | 4.9639          | 4.848                       | 4.9155            | 4.8432             |
| AT4G05020.1 | NDB2 (NAD(P)H DEHYDROGENASE B2); disulfide oxidoreductase                                                                                                                    | 4.3335             | 4.2066                   | 4.2164          | 3.8954                      | 4.1697            | 4.2196             |
| AT4G09000.2 | Symbols: GRF1, GF14 CHI   14-3-3-like protein GF14 chi / general regulatory factor 1 (GRF1)   chr4:5775387-5777157 FORWARD                                                   | 4.3582             | 4.408                    | 4.5783          | 4.7434                      | 4.739             | 4.8332             |
| AT4G09020.1 | Symbols: ATISA3, ISA3   ISA3 (ISOAMYLASE 3); alpha-amylase/ isoamylase   chr4:5784099-5788839                                                                                | 3.9904             | 4.1767                   | 3.9523          | 3.9121                      | 3.8667            | 4.9168             |

**Supplementary Tables pertaining to Figure 2**

**Supplementary Table S12. Root cell type proteins quantified by peak-integration proteomics**

Label-free proteomic log intensity values obtained by peak integration for proteins with  $\geq 2$  unique peptides

| Locus       | Annotation                                                                                                                                                                           | Root Hairs (COBL9) | Non-Hair Epidermis (WER) | Cortex (CORTEX) | Endodermis/ Quiescent (SCR) | Vasculature (WOL) | Columella (PET111) |
|-------------|--------------------------------------------------------------------------------------------------------------------------------------------------------------------------------------|--------------------|--------------------------|-----------------|-----------------------------|-------------------|--------------------|
|             | FORWARD                                                                                                                                                                              |                    |                          |                 |                             |                   |                    |
| AT4G09320.1 | NDPK1 (nucleoside diphosphate kinase 1); ATP binding / nucleoside diphosphate kinase                                                                                                 | 4.8838             | 4.9275                   | 5.0623          | 5.2222                      | 5.221             | 5.107              |
| AT4G11010.1 | Symbols: NDPK3   NDPK3 (NUCLEOSIDE DIPHOSPHATE KINASE 3); ATP binding / nucleoside diphosphate kinase   chr4:6732776-6734294 REVERSE                                                 | 4.6302             | 4.557                    | 4.5037          | 4.5118                      | 4.299             | 4.4473             |
| AT4G11150.1 | TUF (VACUOLAR ATP SYNTHASE SUBUNIT E1)                                                                                                                                               | 5.1781             | 5.0848                   | 5.1882          | 4.9489                      | 5.0096            | 5.008              |
| AT4G11820.2 | Symbols: HMGS, EMB2778, MVA1   MVA1 (HYDROXYMETHYLGLUTARYL-COA SYNTHASE)   chr4:7109118-7111895 REVERSE                                                                              | 3.8329             | 3.9139                   | 4.3463          | 4.417                       | 4.1772            | 3.8392             |
| AT4G12650.1 | endomembrane protein 70, putative                                                                                                                                                    | 4.8412             | 4.888                    | 4.7873          | 4.7037                      | 4.7249            | 4.7977             |
| AT4G13850.1 | Symbols: GR-RBP2, GRP2, ATGRP2   ATGRP2 (GLYCINE-RICH RNA-BINDING PROTEIN 2); RNA binding / double-stranded DNA binding / single-stranded DNA binding   chr4:8021310-8022061 FORWARD | 5.3827             | 5.2356                   | 5.16            | 5.1835                      | 5.2129            | 5.0167             |
| AT4G13930.1 | SHM4 (SERINE HYDROXYMETHYLTRANSFERASE 4); glycine hydroxymethyltransferase                                                                                                           | 4.4792             | 4.4473                   | 4.8639          | 4.8404                      | 4.8052            | 4.7143             |
| AT4G13940.1 | HOG1 (HOMOLOGY-DEPENDENT GENE SILENCING 1); adenosylhomocysteinase                                                                                                                   | 5.6033             | 5.6233                   | 5.8223          | 5.9336                      | 5.8692            | 5.786              |
| AT4G14800.1 | Symbols: PBD2   PBD2 (20S PROTEASOME BETA SUBUNIT 2); peptidase   chr4:8500393-8502053 FORWARD                                                                                       | 4.1125             | 4.1244                   | 4.3132          | 4.413                       | 4.3879            | 4.4414             |
| AT4G14960.2 | TUA6 (tubulin alpha-6 chain)                                                                                                                                                         | 5.4113             | 5.5047                   | 5.7634          | 5.7426                      | 5.6512            | 5.5096             |

**Supplementary Tables pertaining to Figure 2**

**Supplementary Table S12. Root cell type proteins quantified by peak-integration proteomics**

Label-free proteomic log intensity values obtained by peak integration for proteins with  $\geq 2$  unique peptides

| Locus       | Annotation                                                                                                           | Root Hairs (COBL9) | Non-Hair Epidermis (WER) | Cortex (CORTEX) | Endodermis/ Quiescent (SCR) | Vasculature (WOL) | Columella (PET111) |
|-------------|----------------------------------------------------------------------------------------------------------------------|--------------------|--------------------------|-----------------|-----------------------------|-------------------|--------------------|
| AT4G16155.1 | Symbols: LPD1, ptlpd1   LPD1 (LIPOAMIDE DEHYDROGENASE 1); dihydrolipoyl dehydrogenase   chr3:5786508-5790383 REVERSE | 4.6793             | 4.6907                   | 4.962           | 4.8394                      | 4.6393            | 4.4602             |
| AT4G16450.1 | Symbols:   unknown protein   chr4:9280132-9280541 FORWARD                                                            | 4.591              | 4.6259                   | 4.606           | 4.5507                      | 4.5936            | 4.5184             |
| AT4G16660.1 | heat shock protein 70, putative / HSP70, putative                                                                    | 4.7744             | 4.5723                   | 4.5095          | 4.4285                      | 4.5179            | 4.7335             |
| AT4G17530.1 | RAB1C; GTP binding                                                                                                   | 4.9535             | 4.7389                   | 4.8327          | 4.7352                      | 4.6628            | 4.5612             |
| AT4G18030.1 | dehydration-responsive family protein                                                                                | 4.6261             | 4.7645                   | 4.8121          | 4.6818                      | 4.6219            | 4.3457             |
| AT4G18100.1 | 60S ribosomal protein L32 (RPL32A)                                                                                   | 4.7145             | 4.6337                   | 4.7505          | 4.9791                      | 4.9609            | 4.6693             |
| AT4G21150.1 | ribophorin II (RPN2) family protein                                                                                  | 5.6213             | 5.6093                   | 5.5482          | 5.4655                      | 5.4869            | 5.3946             |
| AT4G23620.1 | Symbols:   50S ribosomal protein-related   chr4:12315026-12316669 REVERSE                                            | 4.161              | 4.0235                   | 3.9649          | 3.8695                      | 3.9571            | 3.8414             |
| AT4G23710.1 | Symbols: VHA-G2, VAG2, VATG2   VAG2/VATG2/VHA-G2 (VACUOLAR ATP SYNTHASE SUBUNIT G2)   chr4:12350587-12351364 FORWARD | 4.5821             | 4.3589                   | 4.4049          | 4.2986                      | 4.4225            | 3.9934             |
| AT4G24190.1 | SHD (SHEPHERD); ATP binding                                                                                          | 5.8716             | 5.8089                   | 5.7345          | 5.6844                      | 5.6873            | 5.8602             |
| AT4G24280.1 | CPHSC70-1 (chloroplast heat shock protein 70-1); ATP binding / unfolded protein binding                              | 4.6619             | 4.6147                   | 4.7204          | 4.619                       | 4.6016            | 4.5162             |
| AT4G24830.1 | arginosuccinate synthase family                                                                                      | 5.1177             | 5.0998                   | 5.0778          | 5.0247                      | 5.1305            | 4.9972             |
| AT4G25630.1 | FIB2 (FIBRILLARIN 2)                                                                                                 | 5.3594             | 5.4537                   | 5.2508          | 5.4363                      | 5.4918            | 5.1198             |
| AT4G27090.1 | 60S ribosomal protein L14 (RPL14B)                                                                                   | 5.154              | 5.2241                   | 5.2172          | 5.3362                      | 5.3229            | 5.2434             |
| AT4G27500.1 | Symbols: PPI1   PPI1 (PROTON PUMP INTERACTOR 1)   chr4:13743620-13745906 FORWARD                                     | 4.6939             | 4.4071                   | 4.4474          | 4.2278                      | 4.3261            | 4.1767             |
| AT4G29130.1 | ATHXK1 (GLUCOSE INSENSITIVE 2); ATP binding / hexokinase                                                             | 4.6875             | 4.7244                   | 4.5839          | 4.4743                      | 4.5097            | 4.6265             |
| AT4G29690.1 | type I phosphodiesterase/nucleotide pyrophosphatase family protein                                                   | 4.7962             | 5.2679                   | 4.6773          | 4.6816                      | 4.5758            | 5.2433             |

**Supplementary Tables pertaining to Figure 2**

**Supplementary Table S12. Root cell type proteins quantified by peak-integration proteomics**

Label-free proteomic log intensity values obtained by peak integration for proteins with  $\geq 2$  unique peptides

| Locus       | Annotation                                                                                                                                                                                                  | Root Hairs (COBL9) | Non-Hair Epidermis (WER) | Cortex (CORTEX) | Endodermis/ Quiescent (SCR) | Vasculature (WOL) | Columella (PET111) |
|-------------|-------------------------------------------------------------------------------------------------------------------------------------------------------------------------------------------------------------|--------------------|--------------------------|-----------------|-----------------------------|-------------------|--------------------|
| AT4G29840.1 | Symbols: TS, MTO2   MTO2 (METHIONINE OVER-ACCUMULATOR); threonine synthase   chr4:14599440-14601020 REVERSE                                                                                                 | 4.5329             | 4.5463                   | 4.6277          | 4.4613                      | 4.5531            | 4.4398             |
| AT4G30190.1 | Symbols: PMA2, AHA2   AHA2 (Arabidopsis H(+)-ATPase 2); ATPase   chr4:14770826-14775926 REVERSE                                                                                                             | 5.067              | 5.2049                   | 4.984           | 4.8031                      | 4.8878            | 4.9867             |
| AT4G31340.1 | Symbols:   myosin heavy chain-related   chr4:15205668-15208901 FORWARD                                                                                                                                      | 4.9857             | 4.8282                   | 4.9502          | 4.7312                      | 4.7706            | 4.5413             |
| AT4G31700.1 | RPS6 (RIBOSOMAL PROTEIN S6); structural constituent of ribosome                                                                                                                                             | 4.4477             | 4.4531                   | 4.5262          | 4.7556                      | 4.7276            | 4.5424             |
| AT4G32470.1 | ubiquinol-cytochrome C reductase complex 14 kDa protein, putative                                                                                                                                           | 5.0818             | 5.084                    | 4.9913          | 4.9382                      | 4.9608            | 4.9511             |
| AT4G33680.1 | Symbols: AGD2   AGD2 (ABERRANT GROWTH AND DEATH 2); transaminase   chr4:16171850-16174633 REVERSE                                                                                                           | 4.5316             | 4.5051                   | 4.5135          | 4.4507                      | 4.5509            | 4.5427             |
| AT4G34200.1 | EDA9 (embryo sac development arrest 9); NAD binding / amino acid binding / cofactor binding / oxidoreductase, acting on the CH-OH group of donors, NAD or NADP as acceptor / phosphoglycerate dehydrogenase | 5.675              | 5.6575                   | 5.8032          | 5.639                       | 5.652             | 5.6439             |
| AT4G34450.1 | coatomer gamma-2 subunit, putative / gamma-2 coat protein, putative / gamma-2 COP, putative                                                                                                                 | 4.6361             | 4.6799                   | 4.883           | 4.8056                      | 4.7926            | 4.8423             |
| AT4G34670.1 | 40S ribosomal protein S3A (RPS3aB)                                                                                                                                                                          | 3.5027             | 3.4451                   | 3.4687          | 3.7811                      | 3.7258            | 3.585              |
| AT4G34870.1 | ROC5 (ROTAMASE CYP 5); peptidyl-prolyl cis-trans isomerase                                                                                                                                                  | 4.8598             | 4.9691                   | 5.0564          | 5.1146                      | 4.9769            | 5.3747             |
| AT4G35090.1 | CAT2 (CATALASE 2); catalase                                                                                                                                                                                 | 5.0527             | 5.0496                   | 5.0797          | 4.7672                      | 4.8482            | 5.2645             |
| AT4G35100.1 | PIP3 (PLASMA MEMBRANE INTRINSIC PROTEIN 3); water                                                                                                                                                           | 4.476              | 4.3355                   | 4.8199          | 4.7087                      | 4.5672            | 4.0719             |

**Supplementary Tables pertaining to Figure 2**

**Supplementary Table S12. Root cell type proteins quantified by peak-integration proteomics**

Label-free proteomic log intensity values obtained by peak integration for proteins with  $\geq 2$  unique peptides

| Locus       | Annotation                                                                                                                                                        | Root Hairs (COBL9) | Non-Hair Epidermis (WER) | Cortex (CORTEX) | Endodermis/ Quiescent (SCR) | Vasculature (WOL) | Columella (PET111) |
|-------------|-------------------------------------------------------------------------------------------------------------------------------------------------------------------|--------------------|--------------------------|-----------------|-----------------------------|-------------------|--------------------|
|             | channel                                                                                                                                                           |                    |                          |                 |                             |                   |                    |
| AT4G35630.1 | PSAT (phosphoserine aminotransferase); phosphoserine transaminase                                                                                                 | 4.941              | 5.0277                   | 5.2299          | 5.0287                      | 5.0216            | 5.0884             |
| AT4G36130.1 | Symbols:   60S ribosomal protein L8 (RPL8C)   chr4:17097616-17098659 FORWARD                                                                                      | 4.3618             | 4.3572                   | 4.3281          | 4.462                       | 4.5366            | 4.2255             |
| AT4G37910.1 | MTHSC70-1 (mitochondrial heat shock protein 70-1); ATP binding / unfolded protein binding                                                                         | 5.599              | 5.4984                   | 5.3624          | 5.331                       | 5.4615            | 5.2293             |
| AT4G38510.1 | (VACUOLAR ATP SYNTHASE SUBUNIT B2); hydrogen ion transporting ATP synthase, rotational mechanism                                                                  | 4.9208             | 4.8143                   | 4.8748          | 4.685                       | 4.7787            | 4.6379             |
| AT4G38740.1 | Symbols: ROC1   ROC1 (rotamase CyP 1); peptidyl-prolyl cis-trans isomerase   chr4:18083614-18084132 REVERSE                                                       | 5.2921             | 5.3395                   | 5.5419          | 5.5646                      | 5.5587            | 5.598              |
| AT4G39260.1 | Symbols: GR-RBP8, ATGRP8, CCR1   ATGRP8/GR-RBP8 (COLD, CIRCADIAN RHYTHM, AND RNA BINDING 1, GLYCINE-RICH PROTEIN 8); RNA binding   chr4:18274160-18274952 REVERSE | 4.6902             | 4.6175                   | 4.7743          | 4.987                       | 4.9994            | 4.784              |
| AT4G39980.1 | DHS1 (3-DEOXY-D-ARABINO-HEPTULOSONATE 7-PHOSPHATE SYNTHASE 1); 3-deoxy-7-phosphoheptulonate synthase                                                              | 4.6671             | 4.6774                   | 4.8616          | 4.6525                      | 4.6177            | 4.4674             |
| AT4G40030.2 | histone H3.2                                                                                                                                                      | 4.8262             | 4.8983                   | 4.7856          | 4.8076                      | 4.8875            | 4.8775             |
| AT5G02490.1 | heat shock cognate 70 kDa protein 2 (HSC70-2) (HSP70-2)                                                                                                           | 4.3178             | 4.2504                   | 4.3207          | 4.3311                      | 4.4141            | 4.053              |
| AT5G02500.1 | HSC70-1 (heat shock cognate 70 kDa protein 1); ATP binding                                                                                                        | 6.0607             | 5.9649                   | 6.048           | 6.088                       | 6.0833            | 6.0653             |
| AT5G02870.1 | 60S ribosomal protein L4/L1 (RPL4D)                                                                                                                               | 4.5237             | 4.5426                   | 4.5943          | 4.8027                      | 4.8265            | 4.6761             |

**Supplementary Tables pertaining to Figure 2**

**Supplementary Table S12. Root cell type proteins quantified by peak-integration proteomics**

Label-free proteomic log intensity values obtained by peak integration for proteins with  $\geq 2$  unique peptides

| Locus       | Annotation                                                                                                                                                                              | Root Hairs (COBL9) | Non-Hair Epidermis (WER) | Cortex (CORTEX) | Endodermis/ Quiescent (SCR) | Vasculature (WOL) | Columella (PET111) |
|-------------|-----------------------------------------------------------------------------------------------------------------------------------------------------------------------------------------|--------------------|--------------------------|-----------------|-----------------------------|-------------------|--------------------|
| AT5G03160.1 | Symbols: ATP58IPK   ATP58IPK (ARABIDOPSIS HOMOLOG OF MAMALLIAN P58IPK); binding / heat shock protein binding   chr5:750286-752671 FORWARD                                               | 4.2493             | 4.0983                   | 3.8785          | 3.9901                      | 3.9701            | 4.06               |
| AT5G05170.1 | Symbols: CESA3, IXR1, ATCESA3, ATH-B, CEV1   CEV1 (CONSTITUTIVE EXPRESSION OF VSP 1); cellulose synthase/ transferase, transferring glycosyl groups   chr5:1530401-1535090 REVERSE      | 4.181              | 4.1135                   | 4.4428          | 4.1384                      | 4.1788            | 3.8188             |
| AT5G07090.1 | Symbols:   40S ribosomal protein S4 (RPS4A)   chr2:7546598-7548138 FORWARD                                                                                                              | 5.3608             | 5.3734                   | 5.4951          | 5.6635                      | 5.6079            | 5.415              |
| AT5G07350.2 | Symbols:   tudor domain-containing protein / nuclease family protein   chr5:2319790-2324892 REVERSE                                                                                     | 4.262              | 4.326                    | 4.4335          | 4.366                       | 4.336             | 4.3017             |
| AT5G07440.1 | GDH2 (GLUTAMATE DEHYDROGENASE 2); oxidoreductase                                                                                                                                        | 5.3248             | 5.3553                   | 5.0598          | 4.7531                      | 5.0378            | 5.255              |
| AT5G08300.1 | Symbols:   succinyl-CoA ligase (GDP-forming) alpha-chain, mitochondrial, putative / succinyl-CoA synthetase, alpha chain, putative / SCS-alpha, putative   chr5:2667580-2669673 FORWARD | 4.7184             | 4.5519                   | 4.4052          | 4.3227                      | 4.4671            | 4.4793             |
| AT5G08530.1 | NADH-ubiquinone oxidoreductase 51 kDa subunit, mitochondrial, putative                                                                                                                  | 4.9701             | 5.0115                   | 4.9132          | 4.8288                      | 4.8201            | 4.8779             |
| AT5G08670.1 | ATP synthase beta chain 1, mitochondrial                                                                                                                                                | 6.2722             | 6.2788                   | 6.2426          | 6.1358                      | 6.1548            | 6.1494             |
| AT5G09590.1 | mtHSC70-2 (HEAT SHOCK PROTEIN 70); ATP binding / unfolded protein binding                                                                                                               | 5.1222             | 5.026                    | 4.9514          | 4.9099                      | 4.9953            | 4.9118             |



**Supplementary Tables pertaining to Figure 2**

**Supplementary Table S12. Root cell type proteins quantified by peak-integration proteomics**

Label-free proteomic log intensity values obtained by peak integration for proteins with  $\geq 2$  unique peptides

| Locus       | Annotation                                                                                                                                                     | Root Hairs (COBL9) | Non-Hair Epidermis (WER) | Cortex (CORTEX) | Endodermis/ Quiescent (SCR) | Vasculature (WOL) | Columella (PET111) |
|-------------|----------------------------------------------------------------------------------------------------------------------------------------------------------------|--------------------|--------------------------|-----------------|-----------------------------|-------------------|--------------------|
| AT5G09810.1 | Symbols: ACT2/7, ACT7   ACT7 (actin 7)   chr5:3052810-3054221 FORWARD                                                                                          | 4.9713             | 4.8854                   | 5.0453          | 5.1143                      | 5.1249            | 4.926              |
| AT5G10360.1 | EMB3010 (EMBRYO DEFECTIVE 3010); structural constituent of ribosome                                                                                            | 5.2222             | 5.1734                   | 5.2704          | 5.5203                      | 5.526             | 5.2471             |
| AT5G11520.1 | Symbols: YLS4, ASP3   ASP3 (ASPARTATE AMINOTRANSFERASE 3)   chr5:3685258-3687722 REVERSE                                                                       | 4.5216             | 4.4099                   | 4.5433          | 4.3754                      | 4.547             | 4.5842             |
| AT5G11560.1 | catalytic                                                                                                                                                      | 5.2009             | 5.1692                   | 5.1053          | 5.0443                      | 5.0062            | 4.9488             |
| AT5G11770.1 | NADH-ubiquinone oxidoreductase 20 kDa subunit, mitochondrial                                                                                                   | 4.6907             | 4.733                    | 4.4593          | 4.5806                      | 4.6323            | 4.5679             |
| AT5G12250.1 | Symbols: TUB6   TUB6 (BETA-6 TUBULIN); structural constituent of cytoskeleton   chr5:3961317-3962971 REVERSE                                                   | 4.5474             | 4.5608                   | 4.8763          | 4.562                       | 4.4657            | 4.3343             |
| AT5G13420.1 | transaldolase, putative                                                                                                                                        | 4.7427             | 4.7394                   | 4.9989          | 4.8942                      | 4.7622            | 4.6776             |
| AT5G13440.1 | Symbols:   ubiquinol-cytochrome C reductase iron-sulfur subunit, mitochondrial, putative / Rieske iron-sulfur protein, putative   chr5:4308434-4310025 REVERSE | 5.2059             | 5.1951                   | 5.0985          | 5.0298                      | 5.0462            | 4.9731             |
| AT5G13450.1 | ATP synthase delta chain, mitochondrial, putative / H(+)-transporting two-sector ATPase, delta (OSCP) subunit, putative                                        | 5.4446             | 5.4135                   | 5.297           | 5.2833                      | 5.2887            | 5.1892             |
| AT5G13630.1 | Symbols: GUN5, CCH, CHLH, CCH1   GUN5 (GENOMES UNCOUPLED 5); magnesium chelatase   chr5:4387567-4392082 REVERSE                                                | 3.942              | 3.974                    | 3.8538          | 3.9168                      | 3.8295            | 3.6198             |
| AT5G13710.1 | SMT1 (STEROL METHYLTRANSFERASE 1)                                                                                                                              | 4.7216             | 4.6641                   | 5.1517          | 5.0927                      | 4.7632            | 4.5055             |
| AT5G14030.1 | translocon-associated protein beta                                                                                                                             | 5.2844             | 5.2454                   | 5.2145          | 5.0886                      | 5.1049            | 4.9258             |

**Supplementary Tables pertaining to Figure 2**

**Supplementary Table S12. Root cell type proteins quantified by peak-integration proteomics**

Label-free proteomic log intensity values obtained by peak integration for proteins with  $\geq 2$  unique peptides

| Locus       | Annotation                                                                                                                                                                                     | Root Hairs (COBL9) | Non-Hair Epidermis (WER) | Cortex (CORTEX) | Endodermis/ Quiescent (SCR) | Vasculature (WOL) | Columella (PET111) |
|-------------|------------------------------------------------------------------------------------------------------------------------------------------------------------------------------------------------|--------------------|--------------------------|-----------------|-----------------------------|-------------------|--------------------|
|             | (TRAPB) family protein                                                                                                                                                                         |                    |                          |                 |                             |                   |                    |
| AT5G14040.1 | mitochondrial phosphate transporter                                                                                                                                                            | 5.3556             | 5.315                    | 5.2356          | 5.1566                      | 5.2202            | 5.1975             |
| AT5G14670.1 | Symbols: ATARFA1F   ATARFA1F (ARABIDOPSIS THALIANA ADP-RIBOSYLATION FACTOR A1F); GTP binding / copper ion binding / phospholipase activator/ protein binding   chr1:3513189-3514230 REVERSE    | 4.9674             | 5.0741                   | 5.0686          | 5.082                       | 4.9268            | 5.1084             |
| AT5G15090.1 | porin, putative / voltage-dependent anion-selective channel protein, putative                                                                                                                  | 5.8086             | 5.8374                   | 5.7249          | 5.673                       | 5.6689            | 5.5175             |
| AT5G15200.1 | 40S ribosomal protein S9 (RPS9B)                                                                                                                                                               | 5.011              | 5.0296                   | 5.1263          | 5.3166                      | 5.3144            | 5.0957             |
| AT5G15490.1 | Symbols:   UDP-glucose 6-dehydrogenase, putative   chr5:5027875-5029317 REVERSE                                                                                                                | 4.6517             | 4.6082                   | 4.7426          | 4.752                       | 4.8633            | 5.0968             |
| AT5G15520.1 | 40S ribosomal protein S19 (RPS19B)                                                                                                                                                             | 5.0788             | 5.1244                   | 5.1271          | 5.3795                      | 5.1985            | 5.0804             |
| AT5G15650.1 | RGP2 (Reversibly glycosylated polypeptide-3); DNA binding / alpha-1,4-glucan-protein synthase (UDP-forming)                                                                                    | 5.4914             | 5.4101                   | 5.3763          | 5.4464                      | 5.4531            | 5.8287             |
| AT5G16130.1 | Symbols:   40S ribosomal protein S7 (RPS7C)   chr5:5268987-5269915 FORWARD                                                                                                                     | 4.6018             | 4.6827                   | 4.7459          | 4.8483                      | 4.7581            | 4.6171             |
| AT5G16390.1 | Symbols: CAC1A, BCCP, BCCP1, CAC1-A, BCCP-1, CAC1   BCCP/BCCP-1/BCCP1/CAC1-A/CAC1A (BIOTIN CARBOXYL CARRIER, BIOTIN CARBOXYL CARRIER PROTEIN 1); biotin binding   chr5:5361557-5363023 REVERSE | 4.7288             | 4.7242                   | 4.8433          | 4.795                       | 4.6995            | 4.6157             |
| AT5G17770.1 | ATCBR (NADH:CYTOCHROME B5 REDUCTASE 1)                                                                                                                                                         | 4.9422             | 4.9774                   | 5.0638          | 5.1211                      | 4.9845            | 4.8421             |
| AT5G17920.1 | ATCIMS (COBALAMIN-                                                                                                                                                                             | 5.6811             | 5.6952                   | 5.9072          | 6.0074                      | 5.9189            | 6.0626             |

**Supplementary Tables pertaining to Figure 2**

**Supplementary Table S12. Root cell type proteins quantified by peak-integration proteomics**

Label-free proteomic log intensity values obtained by peak integration for proteins with  $\geq 2$  unique peptides

| Locus       | Annotation                                                                                                                    | Root Hairs (COBL9) | Non-Hair Epidermis (WER) | Cortex (CORTEX) | Endodermis/ Quiescent (SCR) | Vasculature (WOL) | Columella (PET111) |
|-------------|-------------------------------------------------------------------------------------------------------------------------------|--------------------|--------------------------|-----------------|-----------------------------|-------------------|--------------------|
|             | INDEPENDENT METHIONINE SYNTHASE); 5-methyltetrahydropteroyltriglutamate-homocysteine S-methyltransferase/ methionine synthase |                    |                          |                 |                             |                   |                    |
| AT5G18380.1 | 40S ribosomal protein S16 (RPS16C)                                                                                            | 4.4741             | 4.5457                   | 4.6995          | 4.8725                      | 4.8075            | 4.6319             |
| AT5G19510.1 | Symbols:   elongation factor 1B alpha-subunit 2 (eEF1Balpha2)   chr5:6581856-6583139 REVERSE                                  | 4.8497             | 4.7981                   | 5.001           | 5.0809                      | 5.0379            | 4.8625             |
| AT5G19760.1 | dicarboxylate/tricarboxylate carrier (DTC)                                                                                    | 5.5621             | 5.5536                   | 5.5725          | 5.4297                      | 5.4172            | 5.5644             |
| AT5G20010.1 | Symbols: RAN1, ATRAN1, RAN-1   RAN-1 (RAS RELATED NUCLEAR PROTEIN); GTP binding   chr5:6760366-6761749 FORWARD                | 4.6819             | 4.7692                   | 4.9299          | 5.1254                      | 5.0692            | 5.0592             |
| AT5G20160.2 | Symbols:   ribosomal protein L7Ae/L30e/S12e/Gadd45 family protein   chr4:7453296-7454208 FORWARD                              | 4.6522             | 4.6853                   | 4.1015          | 4.6761                      | 4.7475            | 4.2223             |
| AT5G20290.1 | 40S ribosomal protein S8 (RPS8A)                                                                                              | 5.4335             | 5.4168                   | 5.5477          | 5.7212                      | 5.6863            | 5.4879             |
| AT5G20720.1 | CPN20 (CHAPERONIN 20); calmodulin binding                                                                                     | 5.2557             | 5.2684                   | 5.3165          | 5.2688                      | 5.2301            | 5.254              |
| AT5G20890.1 | chaperonin, putative                                                                                                          | 4.152              | 4.1506                   | 4.3069          | 4.4619                      | 4.4457            | 4.2758             |
| AT5G20980.1 | ATMS3 (METHIONINE SYNTHASE 3); 5-methyltetrahydropteroyltriglutamate-homocysteine S-methyltransferase/ methionine synthase    | 5.1308             | 5.1246                   | 5.405           | 5.504                       | 5.338             | 5.5135             |
| AT5G22880.1 | histone H2B, putative                                                                                                         | 5.3018             | 5.4661                   | 5.3473          | 5.3372                      | 5.3714            | 5.3721             |
| AT5G23300.1 | PYRD (PYRIMIDINE D); dihydroorotate dehydrogenase                                                                             | 4.4402             | 4.4646                   | 4.3728          | 4.3924                      | 4.4167            | 4.2794             |
| AT5G23820.1 | Symbols:   MD-2-related lipid recognition domain-containing protein / ML domain-containing protein                            | 4.9953             | 5.4862                   | 4.6988          | 4.6035                      | 4.6454            | 5.7432             |

**Supplementary Tables pertaining to Figure 2**

**Supplementary Table S12. Root cell type proteins quantified by peak-integration proteomics**

Label-free proteomic log intensity values obtained by peak integration for proteins with  $\geq 2$  unique peptides

| Locus       | Annotation                                                                                                                     | Root Hairs (COBL9) | Non-Hair Epidermis (WER) | Cortex (CORTEX) | Endodermis/ Quiescent (SCR) | Vasculature (WOL) | Columella (PET111) |
|-------------|--------------------------------------------------------------------------------------------------------------------------------|--------------------|--------------------------|-----------------|-----------------------------|-------------------|--------------------|
|             | chr5:8031389-8032812 FORWARD                                                                                                   |                    |                          |                 |                             |                   |                    |
| AT5G23860.1 | Symbols: TUB8   TUB8 (tubulin beta-8)   chr5:8042965-8044531 FORWARD                                                           | 3.205              | 3.2583                   | 3.574           | 3.6054                      | 3.6703            | 3.5784             |
| AT5G25100.1 | endomembrane protein 70, putative                                                                                              | 5.3517             | 5.3354                   | 5.3355          | 5.1753                      | 5.1567            | 5.1417             |
| AT5G26260.1 | mepirin and TRAF homology domain-containing protein / MATH domain-containing protein                                           | 5.7521             | 5.6522                   | 4.842           | 4.7997                      | 5.3183            | 5.3447             |
| AT5G26280.1 | Symbols:   mepirin and TRAF homology domain-containing protein / MATH domain-containing protein   chr5:9208724-9210403 FORWARD | 4.3434             | 4.0864                   | 3.5868          | 3.7906                      | 3.8446            | 3.8584             |
| AT5G26360.1 | chaperonin, putative                                                                                                           | 4.1691             | 4.2912                   | 4.431           | 4.4674                      | 4.4568            | 4.4006             |
| AT5G27670.1 | Symbols:   histone H2A, putative   chr5:9792810-9793368 REVERSE                                                                | 4.3318             | 4.5947                   | 4.305           | 4.3696                      | 4.3824            | 4.7496             |
| AT5G28060.1 | 40S ribosomal protein S24 (RPS24B)                                                                                             | 4.8221             | 4.8558                   | 4.9314          | 5.1344                      | 5.0793            | 4.8795             |
| AT5G28540.1 | luminal binding protein 1 (BiP-1) (BP1)                                                                                        | 5.3369             | 5.1344                   | 5.1363          | 5.0197                      | 5.117             | 5.1899             |
| AT5G35360.1 | CAC2 (acetyl co-enzyme A carboxylase biotin carboxylase subunit)                                                               | 5.368              | 5.3857                   | 5.5498          | 5.4695                      | 5.3266            | 5.2268             |
| AT5G35630.1 | Symbols: GLN2, ATGSL1, GS2   GS2 (GLUTAMINE SYNTHETASE 2); glutamate-ammonia ligase   chr5:13848450-13850469 FORWARD           | 5.0746             | 4.9099                   | 4.6781          | 4.455                       | 4.8256            | 4.8091             |
| AT5G35940.1 | Symbols:   jacalin lectin family protein   chr5:14108055-14110038 FORWARD                                                      | 4.558              | 5.0478                   | 4.0844          | 4.1224                      | 4.255             | 4.5952             |
| AT5G37510.2 | Symbols: EMB1467   EMB1467 (EMBRYO DEFECTIVE 1467); NADH dehydrogenase   chr5:14914720-14917677 FORWARD                        | 5.4447             | 5.4567                   | 5.3778          | 5.3006                      | 5.2893            | 5.284              |
| AT5G38480.1 | GRF3 (GENERAL REGULATORY FACTOR 3); protein phosphorylated amino acid binding                                                  | 4.6577             | 4.7412                   | 4.906           | 5.0553                      | 4.9957            | 5.2305             |

**Supplementary Tables pertaining to Figure 2**

**Supplementary Table S12. Root cell type proteins quantified by peak-integration proteomics**

Label-free proteomic log intensity values obtained by peak integration for proteins with  $\geq 2$  unique peptides

| Locus       | Annotation                                                                                                                                     | Root Hairs (COBL9) | Non-Hair Epidermis (WER) | Cortex (CORTEX) | Endodermis/ Quiescent (SCR) | Vasculature (WOL) | Columella (PET111) |
|-------------|------------------------------------------------------------------------------------------------------------------------------------------------|--------------------|--------------------------|-----------------|-----------------------------|-------------------|--------------------|
| AT5G38530.1 | Symbols:   tryptophan synthase-related   chr5:15441327-15443524 FORWARD                                                                        | 4.2323             | 4.3374                   | 4.2582          | 3.9762                      | 4.1382            | 4.3268             |
| AT5G39320.1 | Symbols:   UDP-glucose 6-dehydrogenase, putative   chr5:15760482-15761924 FORWARD                                                              | 3.8965             | 3.585                    | 3.7541          | 3.9777                      | 4.0409            | 3.7308             |
| AT5G39740.1 | Symbols:   60S ribosomal protein L5 (RPL5B)   chr5:15920593-15922413 FORWARD                                                                   | 5.0808             | 5.1046                   | 5.1815          | 5.3055                      | 5.3289            | 5.098              |
| AT5G40770.1 | ATPHB3 (PROHIBITIN 3)                                                                                                                          | 4.2862             | 4.3845                   | 4.2067          | 4.1715                      | 3.8804            | 4.2406             |
| AT5G41790.1 | Symbols: CIP1   CIP1 (COP1-INTERACTIVE PROTEIN 1); protein binding   chr5:16727530-16732391 FORWARD                                            | 4.5985             | 4.5665                   | 4.6304          | 4.5905                      | 4.5972            | 4.5765             |
| AT5G42020.1 | BIP (LUMINAL BINDING PROTEIN); ATP binding                                                                                                     | 6.2818             | 6.1113                   | 6.0026          | 5.9738                      | 6.021             | 6.1321             |
| AT5G42020.2 | BIP (LUMINAL BINDING PROTEIN); ATP binding                                                                                                     | 4.4413             | 4.3303                   | 4.3882          | 4.5366                      | 4.5033            | 4.3306             |
| AT5G42080.1 | ADL1 (ARABIDOPSIS DYNAMIN-LIKE PROTEIN); GTP binding                                                                                           | 4.4594             | 4.3819                   | 4.3763          | 4.3086                      | 4.3306            | 4.3056             |
| AT5G42960.1 | similar to unknown protein [Arabidopsis thaliana] (TAIR:AT1G45170.1); similar to pore protein of 24 kD (OEP24) [Pisum sativum] (GB:CAA04468.1) | 3.995              | 4.0853                   | 4.0793          | 4.0153                      | 3.9008            | 3.675              |
| AT5G42980.1 | ATTRX3 (thioredoxin H-type 3); thiol-disulfide exchange intermediate                                                                           | 4.8301             | 4.9631                   | 5.049           | 5.1798                      | 5.1175            | 5.3696             |
| AT5G43060.1 | Symbols:   cysteine proteinase, putative / thiol protease, putative   chr5:17287012-17289345 REVERSE                                           | 4.6008             | 4.6899                   | 4.7141          | 4.533                       | 4.4568            | 4.8492             |
| AT5G44020.1 | acid phosphatase class B family protein                                                                                                        | 4.9493             | 4.4697                   | 4.3956          | 4.4859                      | 4.6599            | 4.0657             |
| AT5G44340.1 | Symbols: TUB4   TUB4 (tubulin beta-4 chain)   chr5:17876669-17878221                                                                           | 4.0513             | 4.0871                   | 4.3739          | 4.3591                      | 4.2321            | 4.0997             |

**Supplementary Tables pertaining to Figure 2**

**Supplementary Table S12. Root cell type proteins quantified by peak-integration proteomics**

Label-free proteomic log intensity values obtained by peak integration for proteins with  $\geq 2$  unique peptides

| Locus       | Annotation                                                                                                                                      | Root Hairs (COBL9) | Non-Hair Epidermis (WER) | Cortex (CORTEX) | Endodermis/ Quiescent (SCR) | Vasculature (WOL) | Columella (PET111) |
|-------------|-------------------------------------------------------------------------------------------------------------------------------------------------|--------------------|--------------------------|-----------------|-----------------------------|-------------------|--------------------|
|             | REVERSE                                                                                                                                         |                    |                          |                 |                             |                   |                    |
| AT5G47030.1 | ATP synthase delta' chain, mitochondrial                                                                                                        | 5.1663             | 5.077                    | 5.0317          | 4.9713                      | 4.974             | 4.8571             |
| AT5G47770.1 | Symbols: FPS1   FPS1 (FARNESYL DIPHOSPHATE SYNTHASE 1); dimethylallyltranstransferase/ geranyltranstransferase   chr5:19362523-19364641 FORWARD | 4.0541             | 4.1116                   | 4.4567          | 4.398                       | 4.1997            | 4.2351             |
| AT5G47990.1 | Symbols: CYP705A5, THAD, THAD1   CYP705A5; oxygen binding / thalian-diol desaturase   chr5:19434827-19436444 FORWARD                            | 4.2952             | 4.4063                   | 4.1436          | 3.3959                      | 3.9095            | 3.9733             |
| AT5G48810.1 | Symbols: ATB5-B, B5 #3, ATCB5-D, CB5-D   CB5-D (CYTOCHROME B5 ISOFORM D); heme binding   chr5:19789249-19790180 REVERSE                         | 4.8755             | 4.7291                   | 4.8051          | 4.5832                      | 4.4551            | 4.4536             |
| AT5G49460.1 | Symbols: ACLB-2   ACLB-2 (ATP-citrate lyase B-2)   chr5:20072274-20075421 FORWARD                                                               | 4.2261             | 4.3264                   | 4.7652          | 4.7885                      | 4.5931            | 4.5574             |
| AT5G50850.1 | pyruvate dehydrogenase E1 component beta subunit, mitochondrial / PDHE1-B (PDH2)                                                                | 5.0322             | 4.9514                   | 4.9107          | 4.8065                      | 4.9438            | 4.9994             |
| AT5G52470.1 | FIB1 (FIBRILLARIN 1)                                                                                                                            | 4.2214             | 4.3374                   | 4.1268          | 4.385                       | 4.4422            | 4.0602             |
| AT5G52840.1 | NADH-ubiquinone oxidoreductase-related                                                                                                          | 5.1293             | 5.1088                   | 5.0276          | 4.9665                      | 5.0107            | 4.9853             |
| AT5G52920.1 | pyruvate kinase, putative                                                                                                                       | 4.3667             | 4.4066                   | 4.5002          | 4.5903                      | 4.4677            | 4.1385             |
| AT5G53460.1 | Symbols: GLT1   GLT1 (NADH-dependent glutamate synthase 1 gene)   chr5:21717744-21726855 FORWARD                                                | 4.2191             | 4.2435                   | 3.7467          | 3.9608                      | 4.2063            | 4.3079             |
| AT5G53560.1 | ATB5-A (Cytochrome b5 A)                                                                                                                        | 5.2221             | 5.2178                   | 5.2209          | 4.9937                      | 4.9387            | 4.9595             |
| AT5G54100.1 | Symbols:   band 7 family protein   chr5:21954035-21956500 REVERSE                                                                               | 4.2729             | 4.2819                   | 4.1678          | 3.9686                      | 4.0027            | 4.2652             |
| AT5G56030.1 | HSP81-2 (EARLY-RESPONSIVE TO                                                                                                                    | 5.509              | 5.5747                   | 5.7839          | 5.8255                      | 5.7665            | 5.6537             |

**Supplementary Tables pertaining to Figure 2**

**Supplementary Table S12. Root cell type proteins quantified by peak-integration proteomics**

Label-free proteomic log intensity values obtained by peak integration for proteins with  $\geq 2$  unique peptides

| Locus       | Annotation                                                                                                                                                                                 | Root Hairs (COBL9) | Non-Hair Epidermis (WER) | Cortex (CORTEX) | Endodermis/ Quiescent (SCR) | Vasculature (WOL) | Columella (PET111) |
|-------------|--------------------------------------------------------------------------------------------------------------------------------------------------------------------------------------------|--------------------|--------------------------|-----------------|-----------------------------|-------------------|--------------------|
|             | DEHYDRATION 8); ATP binding                                                                                                                                                                |                    |                          |                 |                             |                   |                    |
| AT5G59880.1 | ADF3 (ACTIN DEPOLYMERIZING FACTOR 3); actin binding                                                                                                                                        | 3.9962             | 4.1696                   | 4.2802          | 4.4018                      | 4.4743            | 4.6313             |
| AT5G60390.2 | calmodulin binding / translation elongation factor                                                                                                                                         | 3.6537             | 3.7451                   | 3.6626          | 3.5894                      | 3.6608            | 3.5719             |
| AT5G60960.1 | Symbols:   pentatricopeptide (PPR) repeat-containing protein   chr5:24545649-24547214 REVERSE                                                                                              | 4.1816             | 4.012                    | 3.9663          | 3.9794                      | 3.9122            | 3.6564             |
| AT5G61790.1 | calnexin 1 (CNX1)                                                                                                                                                                          | 5.9547             | 5.9095                   | 5.7849          | 5.7158                      | 5.7421            | 5.8655             |
| AT5G62190.1 | Symbols: PRH75   PRH75; ATP-dependent helicase/ DEAD/H-box RNA helicase binding   chr5:24980542-24983879 REVERSE                                                                           | 4.0812             | 4.3023                   | 3.9705          | 4.2075                      | 4.254             | 3.8659             |
| AT5G62530.1 | Symbols: ATP5CDH, P5CDH, ALDH12A1   ALDH12A1 (Aldehyde dehydrogenase 12A1); 1-pyrroline-5-carboxylate dehydrogenase/ 3-chloroallyl aldehyde dehydrogenase   chr5:25116994-25120385 REVERSE | 4.2998             | 4.3836                   | 4.2905          | 4.1599                      | 4.1962            | 4.384              |
| AT5G62690.1 | TUB2 (Tubulin beta-2); structural molecule                                                                                                                                                 | 5.2831             | 5.3855                   | 5.4457          | 5.5021                      | 5.3887            | 5.2884             |
| AT5G63400.1 | ADK1 (ADENYLATE KINASE 1); adenylate kinase                                                                                                                                                | 5.2564             | 5.2215                   | 5.2192          | 5.1147                      | 5.0827            | 5.2033             |
| AT5G63510.1 | GAMMA CAL1 (GAMMA CARBONIC ANHYDRASE LIKE 1); carbonate dehydratase                                                                                                                        | 4.8769             | 4.9133                   | 4.8363          | 4.6967                      | 4.778             | 4.7823             |
| AT5G63840.1 | Symbols: RSW3   RSW3 (RADIAL SWELLING 3); hydrolase, hydrolyzing O-glycosyl compounds   chr5:25562282-25566148 FORWARD                                                                     | 4.5712             | 4.4677                   | 4.5058          | 4.4155                      | 4.4832            | 4.4025             |
| AT5G65020.1 | ANNAT2 (ANNEXIN ARABIDOPSIS 2); calcium ion binding / calcium-dependent phospholipid binding                                                                                               | 4.691              | 4.8918                   | 4.7896          | 4.713                       | 4.6607            | 5.4369             |
| AT5G65350.1 | Symbols:   histone H3                                                                                                                                                                      | 4.9524             | 5.0812                   | 4.9234          | 5.0152                      | 5.0532            | 4.9992             |

**Supplementary Tables pertaining to Figure 2**

**Supplementary Table S12. Root cell type proteins quantified by peak-integration proteomics**

Label-free proteomic log intensity values obtained by peak integration for proteins with  $\geq 2$  unique peptides

| Locus       | Annotation                                                                                   | Root Hairs (COBL9) | Non-Hair Epidermis (WER) | Cortex (CORTEX) | Endodermis/ Quiescent (SCR) | Vasculature (WOL) | Columella (PET111) |
|-------------|----------------------------------------------------------------------------------------------|--------------------|--------------------------|-----------------|-----------------------------|-------------------|--------------------|
|             | chr5:26119406-26119825 REVERSE                                                               |                    |                          |                 |                             |                   |                    |
| AT5G66510.2 | Symbols: GAMMA CA3   GAMMA CA3 (GAMMA CARBONIC ANHYDRASE 3)   chr5:26567242-26568722 REVERSE | 4.9281             | 4.9616                   | 4.9024          | 4.7886                      | 4.7895            | 4.7803             |
| AT5G66680.1 | DGL1 (defective glycosylation 1); dolichyl-diphosphooligosaccharide-protein glycotransferase | 5.6146             | 5.6109                   | 5.5374          | 5.4463                      | 5.4494            | 5.3617             |
| AT5G66760.1 | SDH1-1 (Succinate dehydrogenase 1-1)                                                         | 5.3232             | 5.3297                   | 5.289           | 5.167                       | 5.1983            | 5.2393             |
| AT5G67500.1 | porin, putative                                                                              | 5.2982             | 5.3013                   | 5.2772          | 5.2238                      | 5.2102            | 5.243              |
| ATMG00070.1 | NADH dehydrogenase subunit 9                                                                 | 4.6526             | 4.6382                   | 4.5944          | 4.5527                      | 4.426             | 4.4415             |
| ATMG00510.1 | NADH dehydrogenase subunit 7                                                                 | 4.2684             | 4.2954                   | 4.3309          | 4.1962                      | 4.1861            | 4.2528             |
| ATMG01190.1 | ATPase subunit 1                                                                             | 6.168              | 6.1773                   | 6.174           | 6.0389                      | 6.0924            | 6.0597             |
|             |                                                                                              |                    |                          |                 |                             |                   |                    |
|             |                                                                                              |                    |                          |                 |                             |                   |                    |
| P00330      | ADH1_YEAST Alcohol dehydrogenase I (EC 1.1.1.1).                                             | 5.833              | 5.83                     | 5.9568          | 5.8184                      | 5.8736            | 5.8987             |



Supplementary Tables pertaining to Figure 2

Supplementary Table S13. Proteins found in both GeLC-MS/MS and peak-integration proteomic approaches coupled with FACS

| Locus     | GeLC-MS/MS binary values |                          |                  |                            |                   |                    | Peak-integration log intensity values |                          |                  |                            |                   |                    |
|-----------|--------------------------|--------------------------|------------------|----------------------------|-------------------|--------------------|---------------------------------------|--------------------------|------------------|----------------------------|-------------------|--------------------|
|           | Root Hairs (COBL9)       | Non-Hair Epidermis (WER) | Cortex (CORT EX) | Endodermis/Quiescent (SCR) | Vasculature (WOL) | Columnella (PET11) | Root Hairs (COBL9)                    | Non-Hair Epidermis (WER) | Cortex (CORT EX) | Endodermis/Quiescent (SCR) | Vasculature (WOL) | Columnella (PET11) |
| AT1G01090 | 1                        | 1                        | 1                | 1                          | 1                 | 1                  | 4.3035                                | 4.3975                   | 4.462            | 4.3879                     | 4.262             | 4.2045             |
| AT1G04040 | 1                        | 0                        | 1                | 0                          | 1                 | 0                  | 4.5854                                | 4.1787                   | 3.4836           | 3.4918                     | 4.2366            | 3.5197             |
| AT1G04270 | 1                        | 0                        | 0                | 1                          | 0                 | 1                  | 4.3578                                | 4.4281                   | 4.3348           | 4.568                      | 4.4208            | 4.4056             |
| AT1G04410 | 1                        | 1                        | 1                | 1                          | 1                 | 1                  | 4.9808                                | 4.9913                   | 5.2186           | 5.3315                     | 5.2178            | 5.4524             |
| AT1G04430 | 1                        | 1                        | 1                | 1                          | 1                 | 0                  | 4.2382                                | 4.3564                   | 4.3535           | 4.3056                     | 4.0263            | 3.9485             |
| AT1G07810 | 1                        | 1                        | 1                | 0                          | 1                 | 0                  | 4.6557                                | 4.5589                   | 4.5623           | 4.3804                     | 4.4823            | 4.2271             |
| AT1G07890 | 1                        | 0                        | 1                | 0                          | 1                 | 1                  | 4.2865                                | 4.2887                   | 4.4674           | 4.6124                     | 4.4281            | 4.6162             |
| AT1G08830 | 1                        | 0                        | 1                | 0                          | 1                 | 1                  | 3.8208                                | 3.8168                   | 3.9022           | 3.9451                     | 3.9459            | 4.3706             |
| AT1G09210 | 1                        | 1                        | 1                | 1                          | 1                 | 1                  | 5.5183                                | 5.3491                   | 5.2665           | 5.2307                     | 5.3066            | 5.3141             |
| AT1G10760 | 1                        | 1                        | 0                | 1                          | 0                 | 1                  | 4.0786                                | 4.36                     | 4.2025           | 4.0885                     | 3.9743            | 5.2205             |
| AT1G11580 | 0                        | 0                        | 1                | 1                          | 1                 | 0                  | 2.7402                                | 3.0167                   | 4.5972           | 4.5721                     | 3.9457            | 3.4316             |
| AT1G11910 | 1                        | 1                        | 1                | 1                          | 1                 | 1                  | 5.0338                                | 5.2292                   | 4.9196           | 5.0226                     | 5.0018            | 5.4009             |
| AT1G12230 | 1                        | 1                        | 1                | 1                          | 1                 | 1                  | 4.1275                                | 4.2259                   | 4.4737           | 4.3449                     | 4.2253            | 4.1231             |
| AT1G12840 | 1                        | 1                        | 1                | 1                          | 1                 | 1                  | 4.8177                                | 4.7421                   | 4.7159           | 4.6478                     | 4.6457            | 4.6319             |
| AT1G13280 | 1                        | 1                        | 1                | 1                          | 1                 | 1                  | 3.8655                                | 4.0783                   | 4.042            | 3.8541                     | 3.7912            | 4.7924             |
| AT1G13440 | 0                        | 0                        | 0                | 0                          | 1                 | 1                  | 5.7341                                | 5.7026                   | 5.9401           | 6.0085                     | 5.8597            | 6.076              |
| AT1G14670 | 1                        | 0                        | 1                | 0                          | 1                 | 0                  | 4.8889                                | 4.8576                   | 4.8497           | 4.6575                     | 4.6676            | 4.6831             |
| AT1G14980 | 1                        | 0                        | 1                | 1                          | 1                 | 1                  | 5.1199                                | 4.973                    | 4.876            | 4.8478                     | 4.9295            | 4.7909             |
| AT1G15690 | 1                        | 1                        | 1                | 1                          | 1                 | 1                  | 5.4904                                | 5.5383                   | 5.6253           | 5.4745                     | 5.4197            | 5.3664             |
| AT1G15930 | 1                        | 0                        | 0                | 1                          | 1                 | 1                  | 4.9478                                | 4.8987                   | 5.0684           | 5.2023                     | 5.0841            | 4.9229             |
| AT1G16300 | 1                        | 0                        | 0                | 0                          | 0                 | 0                  | 4.4686                                | 4.2944                   | 4.0976           | 4.1043                     | 4.2884            | 4.2691             |
| AT1G16920 | 1                        | 0                        | 0                | 0                          | 1                 | 0                  | 4.8311                                | 4.7451                   | 4.7661           | 4.6551                     | 4.6637            | 4.6822             |
| AT1G18080 | 1                        | 1                        | 0                | 1                          | 1                 | 1                  | 5.273                                 | 5.2574                   | 5.4381           | 5.6562                     | 5.5971            | 5.3821             |
| AT1G18540 | 1                        | 0                        | 1                | 1                          | 1                 | 0                  | 4.8398                                | 4.7961                   | 4.8875           | 5.0494                     | 5.0199            | 4.8908             |
| AT1G20450 | 0                        | 0                        | 0                | 0                          | 0                 | 1                  | 3.8053                                | 4.2575                   | 4.06             | 4.1044                     | 4.0586            | 5.5525             |
| AT1G20840 | 1                        | 0                        | 0                | 1                          | 0                 | 0                  | 4.3762                                | 4.2011                   | 4.7365           | 4.3945                     | 4.1351            | 4.1164             |
| AT1G21750 | 1                        | 1                        | 1                | 1                          | 1                 | 1                  | 6.1452                                | 5.8932                   | 5.9708           | 5.8034                     | 5.8671            | 5.8633             |

Supplementary Tables pertaining to Figure 2

Supplementary Table S13. Proteins found in both GeLC-MS/MS and peak-integration proteomic approaches coupled with FACS

| Locus     | GeLC-MS/MS binary values |                          |                  |                            |                   |                    | Peak-integration log intensity values |                          |                  |                            |                   |                    |
|-----------|--------------------------|--------------------------|------------------|----------------------------|-------------------|--------------------|---------------------------------------|--------------------------|------------------|----------------------------|-------------------|--------------------|
|           | Root Hairs (COBL9)       | Non-Hair Epidermis (WER) | Cortex (CORT EX) | Endodermis/Quiescent (SCR) | Vasculature (WOL) | Columnella (PET11) | Root Hairs (COBL9)                    | Non-Hair Epidermis (WER) | Cortex (CORT EX) | Endodermis/Quiescent (SCR) | Vasculature (WOL) | Columnella (PET11) |
| AT1G21750 | 1                        | 1                        | 1                | 1                          | 1                 | 1                  | 4.8076                                | 4.5485                   | 4.6275           | 4.4241                     | 4.3814            | 4.4547             |
| AT1G22300 | 1                        | 1                        | 1                | 1                          | 1                 | 1                  | 4.0811                                | 4.1499                   | 4.3115           | 4.4045                     | 4.3411            | 4.5578             |
| AT1G22410 | 1                        | 1                        | 1                | 1                          | 1                 | 0                  | 4.2109                                | 4.2561                   | 4.5771           | 4.3643                     | 4.3295            | 3.9828             |
| AT1G23190 | 1                        | 0                        | 0                | 0                          | 1                 | 1                  | 4.177                                 | 4.2886                   | 4.3981           | 4.2977                     | 4.4128            | 4.8801             |
| AT1G24180 | 1                        | 1                        | 1                | 1                          | 1                 | 1                  | 4.9549                                | 4.8369                   | 4.7678           | 4.6518                     | 4.7952            | 4.7708             |
| AT1G24360 | 1                        | 1                        | 1                | 1                          | 1                 | 1                  | 4.9346                                | 4.9776                   | 5.1476           | 5.1216                     | 4.9667            | 4.8718             |
| AT1G26630 | 1                        | 0                        | 0                | 0                          | 1                 | 1                  | 4.5074                                | 4.6234                   | 4.7433           | 4.8167                     | 4.8245            | 4.779              |
| AT1G26850 | 1                        | 1                        | 1                | 1                          | 1                 | 1                  | 4.654                                 | 4.4763                   | 4.7452           | 4.6327                     | 4.6664            | 4.2054             |
| AT1G27400 | 1                        | 0                        | 1                | 1                          | 0                 | 0                  | 4.6769                                | 4.7217                   | 4.9164           | 4.956                      | 4.897             | 4.7943             |
| AT1G30120 | 0                        | 0                        | 0                | 1                          | 0                 | 1                  | 5.0366                                | 5.0207                   | 5.2325           | 5.1892                     | 5.0169            | 4.7865             |
| AT1G30580 | 0                        | 0                        | 0                | 1                          | 1                 | 0                  | 4.4272                                | 4.5201                   | 4.7378           | 4.8076                     | 4.7916            | 4.6639             |
| AT1G31812 | 0                        | 0                        | 0                | 0                          | 0                 | 1                  | 4.5534                                | 4.6605                   | 4.7536           | 4.9337                     | 4.8305            | 5.1815             |
| AT1G32900 | 0                        | 0                        | 0                | 0                          | 0                 | 1                  | 2.6594                                | 2.8141                   | 3.0109           | 2.099                      | 2.5071            | 4.7327             |
| AT1G34430 | 1                        | 1                        | 1                | 1                          | 1                 | 1                  | 4.4488                                | 4.4485                   | 4.6788           | 4.6342                     | 4.4348            | 4.4431             |
| AT1G35720 | 1                        | 1                        | 1                | 1                          | 1                 | 1                  | 5.1761                                | 4.9839                   | 4.829            | 4.8852                     | 5.0041            | 5.1259             |
| AT1G42960 | 1                        | 0                        | 0                | 0                          | 1                 | 1                  | 4.588                                 | 4.7268                   | 4.6918           | 4.6679                     | 4.4964            | 4.6045             |
| AT1G43170 | 1                        | 0                        | 1                | 1                          | 1                 | 1                  | 4.9834                                | 4.9605                   | 5.1265           | 5.2511                     | 5.2427            | 4.9975             |
| AT1G47260 | 1                        | 1                        | 1                | 1                          | 1                 | 1                  | 5.4354                                | 5.446                    | 5.3547           | 5.3266                     | 5.281             | 5.2841             |
| AT1G47420 | 1                        | 0                        | 1                | 0                          | 1                 | 1                  | 4.4087                                | 4.4561                   | 4.4324           | 4.1966                     | 4.2093            | 4.4842             |
| AT1G48920 | 1                        | 1                        | 0                | 0                          | 1                 | 0                  | 4.7892                                | 4.8517                   | 4.6408           | 4.9105                     | 4.9319            | 4.5352             |
| AT1G50430 | 1                        | 0                        | 1                | 1                          | 0                 | 0                  | 4.5633                                | 4.5316                   | 4.5933           | 4.5155                     | 4.3795            | 4.1361             |
| AT1G51980 | 1                        | 1                        | 1                | 1                          | 1                 | 1                  | 5.5132                                | 5.509                    | 5.4267           | 5.3551                     | 5.3279            | 5.3627             |
| AT1G52070 | 1                        | 1                        | 0                | 0                          | 1                 | 1                  | 4.8357                                | 5.2877                   | 3.9004           | 4.0216                     | 3.9628            | 4.991              |
| AT1G52360 | 1                        | 0                        | 1                | 0                          | 1                 | 0                  | 4.1953                                | 4.1769                   | 4.3176           | 4.2435                     | 4.2994            | 4.249              |
| AT1G52670 | 1                        | 1                        | 0                | 0                          | 0                 | 0                  | 3.9387                                | 3.9012                   | 4.0656           | 4.0162                     | 3.8274            | 3.5629             |
| AT1G53240 | 1                        | 1                        | 1                | 1                          | 1                 | 1                  | 5.5681                                | 5.5015                   | 5.3211           | 5.3758                     | 5.4696            | 5.5697             |
| AT1G53310 | 1                        | 0                        | 0                | 1                          | 1                 | 0                  | 3.7746                                | 3.871                    | 3.9123           | 4.1441                     | 3.7979            | 4.3982             |

**Supplementary Tables pertaining to Figure 2**

**Supplementary Table S13. Proteins found in both GeLC-MS/MS and peak-integration proteomic approaches coupled with FACS**

| Locus     | GeLC-MS/MS binary values |                          |                  |                            |                   |                    | Peak-integration log intensity values |                          |                  |                            |                   |                    |
|-----------|--------------------------|--------------------------|------------------|----------------------------|-------------------|--------------------|---------------------------------------|--------------------------|------------------|----------------------------|-------------------|--------------------|
|           | Root Hairs (COBL9)       | Non-Hair Epidermis (WER) | Cortex (CORT EX) | Endodermis/Quiescent (SCR) | Vasculature (WOL) | Columnella (PET11) | Root Hairs (COBL9)                    | Non-Hair Epidermis (WER) | Cortex (CORT EX) | Endodermis/Quiescent (SCR) | Vasculature (WOL) | Columnella (PET11) |
| AT1G54000 | 1                        | 1                        | 1                | 1                          | 1                 | 1                  | 5.8383                                | 6.0064                   | 5.255            | 5.054                      | 5.4244            | 5.8615             |
| AT1G54010 | 1                        | 1                        | 1                | 0                          | 1                 | 1                  | 5.0316                                | 5.6632                   | 4.4402           | 4.5121                     | 4.5837            | 4.8613             |
| AT1G55490 | 1                        | 0                        | 0                | 1                          | 1                 | 0                  | 5.1988                                | 5.2003                   | 5.2831           | 5.1802                     | 5.173             | 5.0126             |
| AT1G56070 | 1                        | 1                        | 1                | 1                          | 1                 | 1                  | 5.7203                                | 5.7486                   | 5.8758           | 5.9831                     | 5.9424            | 5.7818             |
| AT1G56110 | 1                        | 1                        | 0                | 1                          | 1                 | 0                  | 4.6603                                | 4.7391                   | 4.446            | 4.6407                     | 4.7161            | 4.2451             |
| AT1G56330 | 1                        | 1                        | 1                | 0                          | 0                 | 1                  | 5.2853                                | 5.1892                   | 5.2897           | 5.2421                     | 5.2243            | 5.2953             |
| AT1G56340 | 1                        | 1                        | 1                | 1                          | 1                 | 1                  | 5.8892                                | 5.7529                   | 5.6947           | 5.6603                     | 5.7033            | 5.7562             |
| AT1G57720 | 1                        | 1                        | 1                | 1                          | 1                 | 1                  | 4.8988                                | 4.8729                   | 5.0267           | 5.1038                     | 5.0457            | 4.8692             |
| AT1G58270 | 1                        | 1                        | 1                | 0                          | 1                 | 1                  | 5.174                                 | 4.743                    | 4.3926           | 4.3824                     | 4.6678            | 4.5733             |
| AT1G61790 | 1                        | 1                        | 1                | 1                          | 1                 | 1                  | 5.08                                  | 5.0412                   | 4.9727           | 4.9127                     | 4.893             | 4.822              |
| AT1G62640 | 1                        | 1                        | 1                | 1                          | 1                 | 0                  | 4.0512                                | 4.1518                   | 4.3773           | 4.2593                     | 4.0923            | 4.2567             |
| AT1G62660 | 1                        | 1                        | 1                | 1                          | 1                 | 1                  | 4.4684                                | 4.2257                   | 4.8381           | 4.3733                     | 4.3117            | 4.2557             |
| AT1G63940 | 1                        | 1                        | 1                | 1                          | 1                 | 1                  | 5.3439                                | 5.3014                   | 5.3177           | 5.1887                     | 5.2929            | 5.4642             |
| AT1G64190 | 1                        | 1                        | 1                | 1                          | 1                 | 1                  | 4.7168                                | 4.6751                   | 4.8689           | 4.703                      | 4.682             | 4.7478             |
| AT1G65930 | 1                        | 0                        | 1                | 1                          | 1                 | 1                  | 5.0055                                | 4.9722                   | 5.3552           | 5.417                      | 5.2747            | 5.2338             |
| AT1G66270 | 1                        | 1                        | 1                | 1                          | 1                 | 1                  | 6.1169                                | 5.9323                   | 5.1801           | 5.1359                     | 5.6453            | 5.4408             |
| AT1G66280 | 1                        | 1                        | 1                | 1                          | 1                 | 1                  | 5.6261                                | 5.7475                   | 4.7866           | 4.7981                     | 5.2722            | 5.6851             |
| AT1G66580 | 1                        | 0                        | 0                | 0                          | 0                 | 0                  | 5.2067                                | 5.2206                   | 5.3132           | 5.4638                     | 5.4692            | 5.2873             |
| AT1G70600 | 1                        | 0                        | 1                | 1                          | 1                 | 1                  | 4.5333                                | 4.5272                   | 4.5075           | 4.8645                     | 4.7356            | 4.5807             |
| AT1G70770 | 1                        | 1                        | 1                | 1                          | 1                 | 1                  | 5.6064                                | 5.5481                   | 5.5259           | 5.3838                     | 5.4812            | 5.2712             |
| AT1G72370 | 1                        | 0                        | 1                | 1                          | 1                 | 1                  | 4.9684                                | 5.0681                   | 5.0829           | 5.3146                     | 5.2746            | 5.0359             |
| AT1G74030 | 1                        | 1                        | 0                | 1                          | 0                 | 1                  | 4.9835                                | 4.9961                   | 5.1768           | 5.096                      | 5.0235            | 4.9595             |
| AT1G76090 | 1                        | 1                        | 1                | 1                          | 1                 | 0                  | 4.781                                 | 4.4459                   | 5.1331           | 4.7999                     | 4.4259            | 3.9332             |
| AT1G77510 | 1                        | 1                        | 1                | 1                          | 1                 | 1                  | 5.7392                                | 5.5499                   | 5.5126           | 5.3626                     | 5.4307            | 5.6935             |
| AT1G78300 | 1                        | 1                        | 1                | 1                          | 1                 | 0                  | 4.1006                                | 4.0907                   | 4.3406           | 4.3361                     | 4.3253            | 4.2465             |
| AT1G78380 | 1                        | 1                        | 0                | 1                          | 1                 | 1                  | 4.1064                                | 4.429                    | 4.1469           | 4.2344                     | 4.1681            | 5.1389             |
| AT1G78570 | 0                        | 0                        | 1                | 0                          | 1                 | 0                  | 4.3609                                | 4.3431                   | 4.4649           | 4.0542                     | 4.3067            | 4.0217             |

Supplementary Tables pertaining to Figure 2

Supplementary Table S13. Proteins found in both GeLC-MS/MS and peak-integration proteomic approaches coupled with FACS

| Locus     | GeLC-MS/MS binary values |                          |                  |                            |                   |                    | Peak-integration log intensity values |                          |                  |                            |                   |                    |
|-----------|--------------------------|--------------------------|------------------|----------------------------|-------------------|--------------------|---------------------------------------|--------------------------|------------------|----------------------------|-------------------|--------------------|
|           | Root Hairs (COBL9)       | Non-Hair Epidermis (WER) | Cortex (CORT EX) | Endodermis/Quiescent (SCR) | Vasculature (WOL) | Columnella (PET11) | Root Hairs (COBL9)                    | Non-Hair Epidermis (WER) | Cortex (CORT EX) | Endodermis/Quiescent (SCR) | Vasculature (WOL) | Columnella (PET11) |
| AT1G78900 | 1                        | 1                        | 1                | 1                          | 1                 | 1                  | 5.8624                                | 5.7834                   | 5.8111           | 5.6755                     | 5.738             | 5.6665             |
| AT1G79440 | 1                        | 1                        | 1                | 0                          | 1                 | 1                  | 4.3236                                | 4.4096                   | 4.4837           | 4.2941                     | 4.2009            | 4.5889             |
| AT1G79530 | 1                        | 1                        | 1                | 1                          | 1                 | 1                  | 5.1886                                | 5.1927                   | 5.2567           | 5.1289                     | 5.1121            | 5.1624             |
| AT1G79550 | 1                        | 1                        | 1                | 1                          | 1                 | 1                  | 4.8457                                | 4.8922                   | 5.2159           | 5.2934                     | 5.1916            | 5.1945             |
| AT1G79930 | 0                        | 0                        | 0                | 1                          | 0                 | 1                  | 3.7006                                | 3.887                    | 3.881            | 4.0282                     | 4.0509            | 3.9498             |
| AT2G01140 | 1                        | 1                        | 1                | 1                          | 1                 | 1                  | 5.3412                                | 5.3473                   | 5.4567           | 5.3614                     | 5.3324            | 5.3299             |
| AT2G01250 | 1                        | 0                        | 1                | 1                          | 1                 | 1                  | 5.0661                                | 5.0365                   | 5.1296           | 5.3206                     | 5.2864            | 5.074              |
| AT2G01720 | 1                        | 1                        | 1                | 0                          | 1                 | 1                  | 5.335                                 | 5.3252                   | 5.2619           | 5.2093                     | 5.2754            | 5.2896             |
| AT2G03120 | 0                        | 0                        | 0                | 0                          | 0                 | 1                  | 4.8033                                | 4.7449                   | 4.6511           | 4.5204                     | 4.6408            | 4.7148             |
| AT2G04030 | 1                        | 1                        | 1                | 1                          | 1                 | 0                  | 5.0074                                | 5.0149                   | 4.906            | 4.832                      | 4.9329            | 4.8494             |
| AT2G05710 | 1                        | 1                        | 1                | 1                          | 1                 | 1                  | 5.0683                                | 4.9923                   | 4.9377           | 4.8899                     | 4.9529            | 5.073              |
| AT2G05990 | 1                        | 1                        | 1                | 1                          | 1                 | 1                  | 4.7194                                | 4.7455                   | 4.9988           | 4.8283                     | 4.6922            | 4.5987             |
| AT2G07050 | 1                        | 1                        | 1                | 1                          | 1                 | 1                  | 4.0729                                | 4.1524                   | 4.3671           | 4.24                       | 4.1678            | 4.0075             |
| AT2G14720 | 1                        | 0                        | 1                | 0                          | 0                 | 1                  | 4.4456                                | 4.5842                   | 4.5067           | 4.5217                     | 4.3922            | 4.4662             |
| AT2G16600 | 1                        | 0                        | 0                | 1                          | 1                 | 1                  | 4.613                                 | 4.7662                   | 4.7644           | 4.8798                     | 4.8591            | 5.1447             |
| AT2G17720 | 1                        | 1                        | 1                | 0                          | 1                 | 0                  | 5.0021                                | 4.6061                   | 4.6291           | 4.5376                     | 4.6379            | 4.2928             |
| AT2G18020 | 1                        | 1                        | 1                | 1                          | 1                 | 1                  | 5.2426                                | 5.2352                   | 5.2954           | 5.422                      | 5.4429            | 5.1936             |
| AT2G18230 | 0                        | 0                        | 0                | 0                          | 0                 | 1                  | 3.2731                                | 3.4755                   | 3.3495           | 3.6272                     | 3.6346            | 4.5709             |
| AT2G20360 | 1                        | 1                        | 1                | 1                          | 1                 | 1                  | 4.8233                                | 4.8873                   | 4.8168           | 4.7202                     | 4.778             | 4.7487             |
| AT2G20420 | 1                        | 1                        | 1                | 1                          | 1                 | 1                  | 5.493                                 | 5.3984                   | 5.3078           | 5.221                      | 5.3648            | 5.3691             |
| AT2G20530 | 1                        | 1                        | 1                | 1                          | 1                 | 1                  | 4.454                                 | 4.4949                   | 4.2554           | 4.3848                     | 4.3275            | 4.2249             |
| AT2G21160 | 1                        | 1                        | 1                | 1                          | 1                 | 0                  | 5.3968                                | 5.3386                   | 5.2922           | 5.2152                     | 5.1911            | 5.0368             |
| AT2G21170 | 1                        | 1                        | 1                | 1                          | 1                 | 1                  | 4.4375                                | 4.5333                   | 4.5899           | 4.4263                     | 4.3445            | 4.8003             |
| AT2G21390 | 1                        | 0                        | 0                | 1                          | 1                 | 1                  | 4.1564                                | 4.2242                   | 4.4437           | 4.3092                     | 4.3379            | 4.4411             |
| AT2G21410 | 1                        | 1                        | 0                | 0                          | 0                 | 1                  | 4.8539                                | 4.8363                   | 4.9183           | 4.67                       | 4.6913            | 4.7379             |
| AT2G21660 | 1                        | 1                        | 1                | 1                          | 1                 | 1                  | 5.3764                                | 5.3356                   | 5.513            | 5.6543                     | 5.6108            | 5.4813             |
| AT2G21870 | 1                        | 1                        | 1                | 1                          | 1                 | 1                  | 5.1717                                | 5.1749                   | 5.1299           | 4.9462                     | 4.9356            | 5.0004             |

Supplementary Tables pertaining to Figure 2

Supplementary Table S13. Proteins found in both GeLC-MS/MS and peak-integration proteomic approaches coupled with FACS

| Locus     | GeLC-MS/MS binary values |                          |                  |                            |                   |                    | Peak-integration log intensity values |                          |                  |                            |                   |                    |
|-----------|--------------------------|--------------------------|------------------|----------------------------|-------------------|--------------------|---------------------------------------|--------------------------|------------------|----------------------------|-------------------|--------------------|
|           | Root Hairs (COBL9)       | Non-Hair Epidermis (WER) | Cortex (CORT EX) | Endodermis/Quiescent (SCR) | Vasculature (WOL) | Columnella (PET11) | Root Hairs (COBL9)                    | Non-Hair Epidermis (WER) | Cortex (CORT EX) | Endodermis/Quiescent (SCR) | Vasculature (WOL) | Columnella (PET11) |
| AT2G22170 | 1                        | 0                        | 1                | 0                          | 1                 | 1                  | 5.0687                                | 5.1616                   | 5.2935           | 4.9886                     | 5.0082            | 5.4028             |
| AT2G25980 | 1                        | 1                        | 0                | 0                          | 1                 | 1                  | 4.7767                                | 5.025                    | 4.2015           | 4.2023                     | 4.3901            | 4.5048             |
| AT2G27730 | 1                        | 1                        | 1                | 0                          | 1                 | 1                  | 5.0473                                | 4.9905                   | 4.9249           | 4.809                      | 4.7963            | 4.6357             |
| AT2G27860 | 1                        | 0                        | 0                | 0                          | 0                 | 1                  | 4.0347                                | 3.9441                   | 4.1922           | 4.3391                     | 4.2712            | 4.321              |
| AT2G28000 | 1                        | 1                        | 1                | 1                          | 1                 | 1                  | 5.2885                                | 5.2846                   | 5.3103           | 5.2584                     | 5.2647            | 5.1384             |
| AT2G29550 | 0                        | 0                        | 0                | 1                          | 0                 | 0                  | 3.9376                                | 4.1862                   | 4.2623           | 4.481                      | 4.3263            | 4.1965             |
| AT2G30200 | 1                        | 1                        | 1                | 1                          | 1                 | 1                  | 4.3596                                | 4.3729                   | 4.4217           | 4.4006                     | 4.3784            | 4.2338             |
| AT2G30490 | 1                        | 1                        | 1                | 1                          | 1                 | 1                  | 3.8467                                | 3.9516                   | 4.6679           | 4.1431                     | 4.1294            | 3.9353             |
| AT2G30860 | 1                        | 0                        | 0                | 1                          | 1                 | 1                  | 4.4767                                | 4.8856                   | 5.0045           | 5.2214                     | 4.8722            | 5.5216             |
| AT2G30970 | 1                        | 1                        | 1                | 1                          | 1                 | 1                  | 4.4746                                | 4.4891                   | 4.4235           | 4.2028                     | 4.3273            | 4.2792             |
| AT2G31390 | 1                        | 1                        | 1                | 1                          | 1                 | 1                  | 4.5078                                | 4.6801                   | 4.8838           | 4.9388                     | 4.7695            | 5.0982             |
| AT2G31610 | 1                        | 0                        | 1                | 0                          | 1                 | 0                  | 5.1926                                | 5.2646                   | 5.3064           | 5.4885                     | 5.4381            | 5.2642             |
| AT2G32060 | 0                        | 0                        | 0                | 0                          | 1                 | 0                  | 4.1252                                | 4.139                    | 4.306            | 4.604                      | 4.5095            | 4.3075             |
| AT2G33040 | 1                        | 1                        | 1                | 1                          | 1                 | 1                  | 5.3631                                | 5.386                    | 5.3075           | 5.2667                     | 5.1975            | 5.2353             |
| AT2G33150 | 1                        | 1                        | 1                | 1                          | 1                 | 1                  | 5.1306                                | 5.1322                   | 5.0595           | 4.8156                     | 4.9201            | 5.3018             |
| AT2G33210 | 1                        | 1                        | 1                | 1                          | 1                 | 1                  | 5.3523                                | 5.2495                   | 5.2044           | 5.1726                     | 5.1828            | 5.0186             |
| AT2G33220 | 1                        | 0                        | 1                | 1                          | 1                 | 1                  | 4.6539                                | 4.686                    | 4.6229           | 4.534                      | 4.541             | 4.5811             |
| AT2G34480 | 1                        | 0                        | 1                | 1                          | 1                 | 1                  | 4.5096                                | 4.4775                   | 4.6301           | 4.7982                     | 4.678             | 4.5161             |
| AT2G35605 | 1                        | 0                        | 0                | 0                          | 1                 | 0                  | 4.7187                                | 4.6519                   | 4.4563           | 4.5714                     | 4.6485            | 4.5013             |
| AT2G36160 | 1                        | 0                        | 1                | 0                          | 0                 | 1                  | 4.5601                                | 4.5064                   | 4.6799           | 4.7777                     | 4.8026            | 4.5889             |
| AT2G36460 | 0                        | 0                        | 0                | 0                          | 0                 | 1                  | 5.4599                                | 5.4291                   | 5.6665           | 5.7777                     | 5.6612            | 5.5897             |
| AT2G36530 | 1                        | 1                        | 1                | 1                          | 1                 | 1                  | 5.2833                                | 5.2727                   | 5.549            | 5.7399                     | 5.6265            | 5.5763             |
| AT2G36880 | 0                        | 1                        | 1                | 0                          | 1                 | 0                  | 4.4394                                | 4.714                    | 4.8883           | 4.9006                     | 4.6952            | 4.5134             |
| AT2G38040 | 1                        | 1                        | 1                | 1                          | 1                 | 1                  | 4.3097                                | 4.383                    | 4.5288           | 4.433                      | 4.2342            | 4.1345             |
| AT2G38750 | 1                        | 1                        | 1                | 0                          | 1                 | 1                  | 5.1136                                | 5.1967                   | 4.3326           | 3.9249                     | 4.6725            | 4.0714             |
| AT2G39800 | 0                        | 0                        | 1                | 0                          | 0                 | 0                  | 3.2499                                | 3.2953                   | 4.2227           | 3.8961                     | 3.4994            | 3.2284             |
| AT2G40510 | 1                        | 0                        | 0                | 0                          | 1                 | 0                  | 4.9703                                | 4.9714                   | 5.1174           | 5.2796                     | 5.2553            | 5.1347             |

**Supplementary Tables pertaining to Figure 2**

**Supplementary Table S13. Proteins found in both GeLC-MS/MS and peak-integration proteomic approaches coupled with FACS**

| Locus     | GeLC-MS/MS binary values |                          |                  |                            |                   |                    | Peak-integration log intensity values |                          |                  |                            |                   |                    |
|-----------|--------------------------|--------------------------|------------------|----------------------------|-------------------|--------------------|---------------------------------------|--------------------------|------------------|----------------------------|-------------------|--------------------|
|           | Root Hairs (COBL9)       | Non-Hair Epidermis (WER) | Cortex (CORT EX) | Endodermis/Quiescent (SCR) | Vasculature (WOL) | Columnella (PET11) | Root Hairs (COBL9)                    | Non-Hair Epidermis (WER) | Cortex (CORT EX) | Endodermis/Quiescent (SCR) | Vasculature (WOL) | Columnella (PET11) |
| AT2G41840 | 1                        | 0                        | 0                | 1                          | 1                 | 0                  | 4.8556                                | 4.907                    | 4.927            | 5.1642                     | 5.1242            | 4.8918             |
| AT2G42210 | 1                        | 1                        | 1                | 0                          | 1                 | 1                  | 4.8924                                | 4.9143                   | 4.8142           | 4.7672                     | 4.7939            | 4.7207             |
| AT2G43090 | 1                        | 0                        | 0                | 1                          | 1                 | 1                  | 4.6848                                | 4.7237                   | 4.6896           | 4.5592                     | 4.6201            | 4.7079             |
| AT2G43610 | 0                        | 1                        | 0                | 0                          | 0                 | 1                  | 3.004                                 | 3.649                    | 2.6684           | 3.1517                     | 2.8679            | 3.6161             |
| AT2G44790 | 1                        | 0                        | 1                | 1                          | 1                 | 1                  | 4.4538                                | 4.28                     | 4.6034           | 4.7585                     | 4.527             | 4.2034             |
| AT2G45740 | 0                        | 0                        | 0                | 0                          | 0                 | 1                  | 4.4388                                | 4.5927                   | 4.6147           | 4.3525                     | 4.232             | 4.8222             |
| AT2G47470 | 1                        | 1                        | 1                | 1                          | 1                 | 1                  | 5.4676                                | 5.3934                   | 5.3784           | 5.365                      | 5.3089            | 5.5573             |
| AT2G47510 | 1                        | 1                        | 1                | 1                          | 1                 | 1                  | 4.0259                                | 3.9991                   | 3.9059           | 3.8645                     | 3.8369            | 3.7587             |
| AT3G01280 | 1                        | 1                        | 1                | 1                          | 1                 | 1                  | 5.747                                 | 5.8046                   | 5.7006           | 5.7013                     | 5.6453            | 5.5641             |
| AT3G01390 | 1                        | 0                        | 1                | 0                          | 1                 | 1                  | 4.7619                                | 4.7414                   | 4.7112           | 4.5846                     | 4.566             | 4.8521             |
| AT3G02090 | 1                        | 1                        | 1                | 1                          | 1                 | 1                  | 5.8455                                | 5.852                    | 5.7469           | 5.6936                     | 5.7102            | 5.6846             |
| AT3G02230 | 1                        | 1                        | 1                | 1                          | 1                 | 1                  | 4.9919                                | 4.8057                   | 4.902            | 4.9072                     | 4.9681            | 5.055              |
| AT3G02530 | 1                        | 0                        | 0                | 1                          | 1                 | 0                  | 3.7203                                | 3.6968                   | 3.9781           | 4.1774                     | 4.1933            | 4.0086             |
| AT3G02630 | 1                        | 1                        | 0                | 1                          | 1                 | 0                  | 4.3966                                | 4.4878                   | 4.5704           | 4.4928                     | 4.3467            | 4.4607             |
| AT3G02780 | 1                        | 0                        | 1                | 0                          | 1                 | 1                  | 4.0008                                | 3.9799                   | 4.1638           | 4.1604                     | 4.1365            | 4.3256             |
| AT3G03960 | 1                        | 0                        | 1                | 1                          | 1                 | 0                  | 4.3701                                | 4.4418                   | 4.4568           | 4.6892                     | 4.6379            | 4.5256             |
| AT3G04120 | 0                        | 1                        | 0                | 1                          | 0                 | 1                  | 4.6678                                | 4.5824                   | 4.7637           | 4.9271                     | 4.7032            | 4.7936             |
| AT3G04840 | 1                        | 1                        | 1                | 1                          | 1                 | 1                  | 4.923                                 | 4.9337                   | 4.918            | 5.2009                     | 5.1918            | 4.9543             |
| AT3G05560 | 1                        | 0                        | 1                | 0                          | 0                 | 1                  | 5.0878                                | 5.0859                   | 5.1322           | 5.1463                     | 5.0521            | 4.9845             |
| AT3G06300 | 1                        | 1                        | 1                | 0                          | 1                 | 1                  | 4.7894                                | 4.4161                   | 4.2912           | 4.2111                     | 4.4467            | 3.9979             |
| AT3G06860 | 1                        | 1                        | 1                | 0                          | 1                 | 1                  | 4.0015                                | 3.9532                   | 3.846            | 3.6598                     | 3.8333            | 4.2926             |
| AT3G07770 | 1                        | 1                        | 1                | 1                          | 1                 | 1                  | 4.567                                 | 4.476                    | 4.2387           | 4.3247                     | 4.2677            | 4.0243             |
| AT3G08580 | 1                        | 1                        | 1                | 1                          | 1                 | 1                  | 5.9422                                | 5.9418                   | 5.8863           | 5.8363                     | 5.7693            | 5.7975             |
| AT3G09200 | 1                        | 1                        | 0                | 1                          | 1                 | 1                  | 5.3473                                | 5.3242                   | 5.4664           | 5.6316                     | 5.6232            | 5.4354             |
| AT3G09260 | 1                        | 1                        | 1                | 1                          | 1                 | 1                  | 6.1616                                | 6.2885                   | 5.4886           | 5.3711                     | 5.8827            | 6.0015             |
| AT3G09440 | 1                        | 0                        | 1                | 1                          | 1                 | 0                  | 4.6749                                | 4.6095                   | 4.6888           | 4.6688                     | 4.7628            | 4.7725             |
| AT3G09630 | 1                        | 0                        | 0                | 1                          | 1                 | 0                  | 5.007                                 | 5                        | 4.9952           | 5.2103                     | 5.1781            | 5.0169             |

**Supplementary Tables pertaining to Figure 2**

**Supplementary Table S13. Proteins found in both GeLC-MS/MS and peak-integration proteomic approaches coupled with FACS**

| Locus     | GeLC-MS/MS binary values |                          |                  |                            |                   |                    | Peak-integration log intensity values |                          |                  |                            |                   |                    |
|-----------|--------------------------|--------------------------|------------------|----------------------------|-------------------|--------------------|---------------------------------------|--------------------------|------------------|----------------------------|-------------------|--------------------|
|           | Root Hairs (COBL9)       | Non-Hair Epidermis (WER) | Cortex (CORT EX) | Endodermis/Quiescent (SCR) | Vasculature (WOL) | Columnella (PET11) | Root Hairs (COBL9)                    | Non-Hair Epidermis (WER) | Cortex (CORT EX) | Endodermis/Quiescent (SCR) | Vasculature (WOL) | Columnella (PET11) |
| AT3G09820 | 1                        | 1                        | 0                | 1                          | 1                 | 1                  | 4.4109                                | 4.4406                   | 4.5619           | 4.7175                     | 4.6819            | 4.5432             |
| AT3G09840 | 1                        | 1                        | 0                | 1                          | 1                 | 0                  | 4.6297                                | 4.6245                   | 4.7774           | 4.9173                     | 4.9194            | 4.9818             |
| AT3G10370 | 1                        | 0                        | 1                | 0                          | 1                 | 1                  | 3.7075                                | 3.6736                   | 3.4259           | 3.2406                     | 3.5349            | 3.6771             |
| AT3G11130 | 1                        | 1                        | 1                | 1                          | 1                 | 1                  | 4.3704                                | 4.2747                   | 4.4342           | 4.396                      | 4.3538            | 4.4011             |
| AT3G11250 | 0                        | 0                        | 0                | 1                          | 0                 | 0                  | 4.0284                                | 4.0735                   | 4.2471           | 4.2876                     | 4.2108            | 3.9583             |
| AT3G11830 | 1                        | 0                        | 0                | 1                          | 1                 | 0                  | 4.0768                                | 4.1694                   | 4.3164           | 4.5326                     | 4.4695            | 4.2993             |
| AT3G12780 | 1                        | 1                        | 1                | 1                          | 1                 | 1                  | 4.2843                                | 4.3436                   | 4.6534           | 4.4609                     | 4.3546            | 4.5626             |
| AT3G13860 | 1                        | 1                        | 1                | 1                          | 1                 | 1                  | 4.6321                                | 4.541                    | 4.4083           | 4.3689                     | 4.4366            | 4.4217             |
| AT3G13870 | 1                        | 1                        | 1                | 0                          | 1                 | 1                  | 4.6401                                | 4.5249                   | 4.426            | 4.3423                     | 4.3335            | 4.4839             |
| AT3G13920 | 1                        | 0                        | 1                | 1                          | 1                 | 1                  | 5.3863                                | 5.4692                   | 5.5585           | 5.5498                     | 5.5456            | 5.4142             |
| AT3G13930 | 1                        | 1                        | 1                | 1                          | 1                 | 1                  | 5.1271                                | 5.0705                   | 5.0596           | 4.9264                     | 4.9908            | 5.0276             |
| AT3G14990 | 0                        | 0                        | 0                | 1                          | 0                 | 1                  | 3.5112                                | 3.8125                   | 4.0581           | 4.2327                     | 4.1698            | 4.9944             |
| AT3G15000 | 1                        | 0                        | 1                | 0                          | 1                 | 1                  | 4.9187                                | 4.9095                   | 4.7901           | 4.8011                     | 4.9231            | 4.6631             |
| AT3G15020 | 1                        | 1                        | 1                | 1                          | 1                 | 1                  | 5.5452                                | 5.4912                   | 5.4518           | 5.3591                     | 5.4737            | 5.509              |
| AT3G15730 | 1                        | 0                        | 1                | 1                          | 1                 | 1                  | 3.7714                                | 3.6665                   | 3.8443           | 3.8962                     | 3.7938            | 4.2931             |
| AT3G15950 | 1                        | 1                        | 1                | 1                          | 1                 | 1                  | 6.0657                                | 5.9345                   | 5.1331           | 5.0702                     | 5.5965            | 5.5535             |
| AT3G16410 | 1                        | 1                        | 0                | 0                          | 1                 | 1                  | 5.1239                                | 5.318                    | 4.533            | 4.4454                     | 4.7804            | 4.9839             |
| AT3G16420 | 1                        | 1                        | 1                | 0                          | 1                 | 1                  | 5.4951                                | 5.5968                   | 5.005            | 4.9619                     | 5.1392            | 5.7362             |
| AT3G16460 | 1                        | 1                        | 1                | 0                          | 1                 | 1                  | 6.1121                                | 6.1421                   | 5.2974           | 5.2755                     | 5.625             | 5.8886             |
| AT3G16480 | 1                        | 1                        | 1                | 1                          | 1                 | 1                  | 4.754                                 | 4.774                    | 4.7212           | 4.6037                     | 4.5373            | 4.5259             |
| AT3G17240 | 1                        | 1                        | 1                | 1                          | 1                 | 1                  | 4.8004                                | 4.6925                   | 4.7045           | 4.6127                     | 4.6907            | 4.7509             |
| AT3G17390 | 1                        | 1                        | 1                | 0                          | 1                 | 1                  | 5.3861                                | 5.5389                   | 5.6434           | 5.6138                     | 5.5871            | 5.461              |
| AT3G17810 | 1                        | 1                        | 0                | 1                          | 0                 | 1                  | 4.3236                                | 4.3639                   | 4.3315           | 4.1861                     | 4.1545            | 4.5406             |
| AT3G18000 | 0                        | 0                        | 1                | 0                          | 0                 | 1                  | 3.9431                                | 4.0984                   | 4.6957           | 4.4883                     | 4.2225            | 4.4926             |
| AT3G18130 | 0                        | 1                        | 0                | 1                          | 1                 | 0                  | 4.2937                                | 4.349                    | 4.4611           | 4.6508                     | 4.5746            | 4.2999             |
| AT3G18190 | 1                        | 0                        | 0                | 1                          | 1                 | 0                  | 4.4387                                | 4.5279                   | 4.6778           | 4.8599                     | 4.8636            | 4.6418             |
| AT3G19820 | 1                        | 1                        | 1                | 1                          | 1                 | 1                  | 5.7369                                | 5.7698                   | 5.9862           | 5.8156                     | 5.6221            | 5.4318             |

Supplementary Tables pertaining to Figure 2

Supplementary Table S13. Proteins found in both GeLC-MS/MS and peak-integration proteomic approaches coupled with FACS

| Locus     | GeLC-MS/MS binary values |                          |                  |                            |                   |                    | Peak-integration log intensity values |                          |                  |                            |                   |                    |
|-----------|--------------------------|--------------------------|------------------|----------------------------|-------------------|--------------------|---------------------------------------|--------------------------|------------------|----------------------------|-------------------|--------------------|
|           | Root Hairs (COBL9)       | Non-Hair Epidermis (WER) | Cortex (CORT EX) | Endodermis/Quiescent (SCR) | Vasculature (WOL) | Columnella (PET11) | Root Hairs (COBL9)                    | Non-Hair Epidermis (WER) | Cortex (CORT EX) | Endodermis/Quiescent (SCR) | Vasculature (WOL) | Columnella (PET11) |
| AT3G20000 | 1                        | 1                        | 1                | 1                          | 1                 | 1                  | 4.9937                                | 5.0125                   | 4.9129           | 4.9045                     | 4.8835            | 4.8013             |
| AT3G20050 | 1                        | 0                        | 0                | 1                          | 1                 | 0                  | 3.9372                                | 4.0782                   | 4.1769           | 4.4782                     | 4.5947            | 4.3751             |
| AT3G20370 | 1                        | 1                        | 1                | 0                          | 1                 | 1                  | 5.1122                                | 4.8314                   | 4.0459           | 3.8266                     | 4.5114            | 4.7024             |
| AT3G22200 | 1                        | 1                        | 1                | 1                          | 1                 | 1                  | 4.4365                                | 4.3276                   | 4.1881           | 4.0101                     | 4.1732            | 4.6819             |
| AT3G22960 | 1                        | 1                        | 1                | 1                          | 1                 | 1                  | 4.5401                                | 4.5646                   | 4.7703           | 4.6696                     | 4.5142            | 4.4899             |
| AT3G23990 | 1                        | 1                        | 1                | 1                          | 1                 | 1                  | 5.8109                                | 5.7646                   | 5.6665           | 5.6175                     | 5.6417            | 5.6391             |
| AT3G25860 | 1                        | 1                        | 1                | 1                          | 1                 | 1                  | 5.1489                                | 5.1783                   | 5.3634           | 5.2945                     | 5.1158            | 5.0308             |
| AT3G27240 | 1                        | 1                        | 1                | 1                          | 1                 | 1                  | 4.5913                                | 4.6229                   | 4.5959           | 4.4873                     | 4.5814            | 4.5106             |
| AT3G42050 | 1                        | 1                        | 1                | 1                          | 1                 | 1                  | 4.8446                                | 4.7727                   | 4.814            | 4.6928                     | 4.7037            | 4.7862             |
| AT3G44110 | 0                        | 0                        | 0                | 0                          | 1                 | 0                  | 4.6584                                | 4.5435                   | 4.7726           | 4.7446                     | 4.6781            | 4.459              |
| AT3G44330 | 1                        | 1                        | 1                | 1                          | 1                 | 1                  | 4.8023                                | 4.7689                   | 4.8324           | 4.6998                     | 4.6984            | 4.5755             |
| AT3G46040 | 0                        | 0                        | 0                | 0                          | 0                 | 1                  | 4.4014                                | 4.4435                   | 4.4543           | 4.5927                     | 4.4724            | 4.4211             |
| AT3G47520 | 1                        | 1                        | 1                | 1                          | 1                 | 1                  | 5.4958                                | 5.4767                   | 5.595            | 5.474                      | 5.476             | 5.435              |
| AT3G48000 | 1                        | 1                        | 1                | 1                          | 1                 | 1                  | 4.5333                                | 4.9012                   | 5.1262           | 4.5337                     | 4.2413            | 5.1701             |
| AT3G48340 | 1                        | 1                        | 1                | 0                          | 1                 | 1                  | 5.3197                                | 5.0337                   | 4.0398           | 4.1866                     | 4.7924            | 4.5722             |
| AT3G48870 | 0                        | 1                        | 1                | 1                          | 1                 | 0                  | 4.6316                                | 4.7102                   | 4.8497           | 4.7602                     | 4.7193            | 4.7503             |
| AT3G48930 | 0                        | 0                        | 1                | 0                          | 1                 | 0                  | 4.8503                                | 4.8714                   | 5.0293           | 5.2007                     | 5.1526            | 4.943              |
| AT3G49010 | 1                        | 0                        | 0                | 0                          | 1                 | 0                  | 4.8492                                | 4.8595                   | 4.9253           | 5.0743                     | 5.1014            | 4.8402             |
| AT3G49720 | 1                        | 1                        | 1                | 1                          | 1                 | 1                  | 5.0195                                | 5.0182                   | 4.9533           | 4.7816                     | 4.8745            | 4.811              |
| AT3G49910 | 1                        | 0                        | 0                | 1                          | 1                 | 1                  | 4.1579                                | 4.172                    | 4.3339           | 4.4869                     | 4.3645            | 4.3128             |
| AT3G51800 | 1                        | 0                        | 0                | 0                          | 1                 | 0                  | 3.7834                                | 3.8019                   | 3.8363           | 4.2056                     | 4.2568            | 3.9705             |
| AT3G52200 | 1                        | 1                        | 1                | 0                          | 1                 | 1                  | 4.6468                                | 4.5472                   | 4.4784           | 4.3806                     | 4.4196            | 4.5413             |
| AT3G52300 | 1                        | 1                        | 1                | 1                          | 1                 | 1                  | 5.4492                                | 5.4733                   | 5.4224           | 5.3321                     | 5.3282            | 5.3363             |
| AT3G52580 | 0                        | 0                        | 0                | 0                          | 1                 | 0                  | 5.1432                                | 5.0862                   | 5.2597           | 5.3923                     | 5.3786            | 5.1303             |
| AT3G52730 | 1                        | 0                        | 0                | 0                          | 1                 | 0                  | 4.6371                                | 4.6306                   | 4.5251           | 4.4378                     | 4.4527            | 4.2571             |
| AT3G52930 | 1                        | 1                        | 1                | 1                          | 1                 | 1                  | 5.5683                                | 5.5524                   | 5.8128           | 5.8669                     | 5.7527            | 5.6383             |
| AT3G52960 | 1                        | 1                        | 1                | 1                          | 1                 | 0                  | 4.9005                                | 4.8725                   | 5.0996           | 4.9412                     | 4.8105            | 4.8031             |



Supplementary Tables pertaining to Figure 2

Supplementary Table S13. Proteins found in both GeLC-MS/MS and peak-integration proteomic approaches coupled with FACS

| Locus     | GeLC-MS/MS binary values |                          |                  |                            |                   |                    | Peak-integration log intensity values |                          |                  |                            |                   |                    |
|-----------|--------------------------|--------------------------|------------------|----------------------------|-------------------|--------------------|---------------------------------------|--------------------------|------------------|----------------------------|-------------------|--------------------|
|           | Root Hairs (COBL9)       | Non-Hair Epidermis (WER) | Cortex (CORT EX) | Endodermis/Quiescent (SCR) | Vasculature (WOL) | Columnella (PET11) | Root Hairs (COBL9)                    | Non-Hair Epidermis (WER) | Cortex (CORT EX) | Endodermis/Quiescent (SCR) | Vasculature (WOL) | Columnella (PET11) |
| AT3G53430 | 0                        | 1                        | 0                | 0                          | 0                 | 0                  | 5.4739                                | 5.4452                   | 5.5971           | 5.6892                     | 5.7109            | 5.4987             |
| AT3G54960 | 1                        | 1                        | 1                | 1                          | 1                 | 1                  | 5.5307                                | 5.122                    | 4.9639           | 4.7323                     | 5.0842            | 4.9861             |
| AT3G55360 | 1                        | 1                        | 1                | 1                          | 1                 | 0                  | 4.3896                                | 4.4377                   | 4.4518           | 4.3359                     | 4.2545            | 4.0549             |
| AT3G55410 | 1                        | 1                        | 1                | 1                          | 1                 | 1                  | 4.9533                                | 4.8934                   | 4.7269           | 4.6654                     | 4.7844            | 4.7053             |
| AT3G55440 | 1                        | 1                        | 1                | 1                          | 1                 | 1                  | 4.7648                                | 4.7728                   | 4.9382           | 5.1329                     | 5.0795            | 5.185              |
| AT3G57010 | 0                        | 1                        | 1                | 1                          | 1                 | 1                  | 4.2169                                | 4.4836                   | 4.6949           | 4.9575                     | 4.8002            | 4.5937             |
| AT3G57610 | 1                        | 1                        | 1                | 1                          | 1                 | 1                  | 4.4158                                | 4.4343                   | 4.5338           | 4.5027                     | 4.3997            | 4.4199             |
| AT3G58610 | 1                        | 1                        | 1                | 1                          | 1                 | 1                  | 5.236                                 | 5.2361                   | 5.2607           | 5.1631                     | 5.2035            | 5.103              |
| AT3G60750 | 1                        | 1                        | 1                | 1                          | 1                 | 1                  | 5.4188                                | 5.3885                   | 5.6072           | 5.406                      | 5.3649            | 5.4938             |
| AT3G60770 | 0                        | 0                        | 0                | 0                          | 1                 | 0                  | 4.8602                                | 4.8762                   | 4.9476           | 5.1277                     | 5.0925            | 4.8806             |
| AT3G61440 | 1                        | 0                        | 1                | 1                          | 1                 | 1                  | 4.3458                                | 4.402                    | 4.6445           | 4.4443                     | 4.2977            | 4.5729             |
| AT3G62360 | 1                        | 1                        | 1                | 1                          | 1                 | 1                  | 5.3191                                | 5.2744                   | 5.2936           | 5.1941                     | 5.1984            | 5.0488             |
| AT3G62830 | 1                        | 1                        | 1                | 1                          | 1                 | 1                  | 4.5912                                | 4.4251                   | 4.3553           | 4.2445                     | 4.3343            | 4.5807             |
| AT4G00490 | 1                        | 1                        | 0                | 0                          | 0                 | 1                  | 4.0842                                | 4.0415                   | 4.0324           | 3.93                       | 3.8331            | 4.6723             |
| AT4G00860 | 1                        | 0                        | 1                | 1                          | 1                 | 1                  | 4.6568                                | 4.6419                   | 4.6332           | 4.5827                     | 4.3948            | 4.5688             |
| AT4G01100 | 1                        | 1                        | 1                | 1                          | 1                 | 1                  | 4.9291                                | 4.807                    | 4.7611           | 4.7383                     | 4.8193            | 4.4809             |
| AT4G01850 | 1                        | 1                        | 1                | 0                          | 1                 | 0                  | 4.8284                                | 4.6919                   | 4.658            | 4.8043                     | 4.793             | 4.6068             |
| AT4G02450 | 1                        | 0                        | 1                | 0                          | 1                 | 0                  | 4.6206                                | 4.6874                   | 4.8319           | 5.0508                     | 4.9584            | 4.8488             |
| AT4G02930 | 1                        | 1                        | 1                | 1                          | 1                 | 1                  | 5.1353                                | 5.0099                   | 4.9639           | 4.848                      | 4.9155            | 4.8432             |
| AT4G05020 | 1                        | 1                        | 1                | 1                          | 1                 | 1                  | 4.3335                                | 4.2066                   | 4.2164           | 3.8954                     | 4.1697            | 4.2196             |
| AT4G09000 | 1                        | 1                        | 1                | 1                          | 1                 | 1                  | 4.3582                                | 4.408                    | 4.5783           | 4.7434                     | 4.739             | 4.8332             |
| AT4G09020 | 1                        | 1                        | 0                | 0                          | 0                 | 1                  | 3.9904                                | 4.1767                   | 3.9523           | 3.9121                     | 3.8667            | 4.9168             |
| AT4G09320 | 1                        | 1                        | 1                | 1                          | 1                 | 1                  | 4.8838                                | 4.9275                   | 5.0623           | 5.2222                     | 5.221             | 5.107              |
| AT4G11010 | 1                        | 1                        | 1                | 1                          | 1                 | 1                  | 4.6302                                | 4.557                    | 4.5037           | 4.5118                     | 4.299             | 4.4473             |
| AT4G11150 | 1                        | 1                        | 1                | 1                          | 1                 | 1                  | 5.1781                                | 5.0848                   | 5.1882           | 4.9489                     | 5.0096            | 5.008              |
| AT4G11820 | 1                        | 0                        | 0                | 1                          | 1                 | 0                  | 3.8329                                | 3.9139                   | 4.3463           | 4.417                      | 4.1772            | 3.8392             |
| AT4G12650 | 1                        | 1                        | 1                | 1                          | 1                 | 1                  | 4.8412                                | 4.888                    | 4.7873           | 4.7037                     | 4.7249            | 4.7977             |

Supplementary Tables pertaining to Figure 2

Supplementary Table S13. Proteins found in both GeLC-MS/MS and peak-integration proteomic approaches coupled with FACS

| Locus     | GeLC-MS/MS binary values |                          |                  |                            |                   |                    | Peak-integration log intensity values |                          |                  |                            |                   |                    |
|-----------|--------------------------|--------------------------|------------------|----------------------------|-------------------|--------------------|---------------------------------------|--------------------------|------------------|----------------------------|-------------------|--------------------|
|           | Root Hairs (COBL9)       | Non-Hair Epidermis (WER) | Cortex (CORT EX) | Endodermis/Quiescent (SCR) | Vasculature (WOL) | Columnella (PET11) | Root Hairs (COBL9)                    | Non-Hair Epidermis (WER) | Cortex (CORT EX) | Endodermis/Quiescent (SCR) | Vasculature (WOL) | Columnella (PET11) |
| AT4G13850 | 1                        | 0                        | 0                | 0                          | 1                 | 0                  | 5.3827                                | 5.2356                   | 5.16             | 5.1835                     | 5.2129            | 5.0167             |
| AT4G13930 | 1                        | 1                        | 1                | 1                          | 1                 | 1                  | 4.4792                                | 4.4473                   | 4.8639           | 4.8404                     | 4.8052            | 4.7143             |
| AT4G13940 | 1                        | 1                        | 1                | 1                          | 1                 | 1                  | 5.6033                                | 5.6233                   | 5.8223           | 5.9336                     | 5.8692            | 5.786              |
| AT4G14800 | 1                        | 0                        | 0                | 1                          | 1                 | 0                  | 4.1125                                | 4.1244                   | 4.3132           | 4.413                      | 4.3879            | 4.4414             |
| AT4G16155 | 1                        | 1                        | 0                | 1                          | 1                 | 1                  | 4.6793                                | 4.6907                   | 4.962            | 4.8394                     | 4.6393            | 4.4602             |
| AT4G16450 | 1                        | 0                        | 1                | 1                          | 1                 | 1                  | 4.591                                 | 4.6259                   | 4.606            | 4.5507                     | 4.5936            | 4.5184             |
| AT4G16660 | 1                        | 1                        | 1                | 1                          | 1                 | 1                  | 4.7744                                | 4.5723                   | 4.5095           | 4.4285                     | 4.5179            | 4.7335             |
| AT4G17530 | 1                        | 0                        | 0                | 0                          | 0                 | 1                  | 4.9535                                | 4.7389                   | 4.8327           | 4.7352                     | 4.6628            | 4.5612             |
| AT4G18030 | 1                        | 1                        | 1                | 1                          | 1                 | 1                  | 4.6261                                | 4.7645                   | 4.8121           | 4.6818                     | 4.6219            | 4.3457             |
| AT4G18100 | 1                        | 0                        | 0                | 1                          | 1                 | 0                  | 4.7145                                | 4.6337                   | 4.7505           | 4.9791                     | 4.9609            | 4.6693             |
| AT4G21150 | 1                        | 1                        | 1                | 1                          | 1                 | 1                  | 5.6213                                | 5.6093                   | 5.5482           | 5.4655                     | 5.4869            | 5.3946             |
| AT4G23620 | 1                        | 0                        | 1                | 0                          | 1                 | 0                  | 4.161                                 | 4.0235                   | 3.9649           | 3.8695                     | 3.9571            | 3.8414             |
| AT4G23710 | 1                        | 0                        | 0                | 0                          | 1                 | 0                  | 4.5821                                | 4.3589                   | 4.4049           | 4.2986                     | 4.4225            | 3.9934             |
| AT4G24190 | 1                        | 1                        | 1                | 1                          | 1                 | 1                  | 5.8716                                | 5.8089                   | 5.7345           | 5.6844                     | 5.6873            | 5.8602             |
| AT4G24280 | 1                        | 1                        | 1                | 1                          | 1                 | 0                  | 4.6619                                | 4.6147                   | 4.7204           | 4.619                      | 4.6016            | 4.5162             |
| AT4G24830 | 1                        | 1                        | 0                | 1                          | 1                 | 1                  | 5.1177                                | 5.0998                   | 5.0778           | 5.0247                     | 5.1305            | 4.9972             |
| AT4G25630 | 1                        | 0                        | 0                | 1                          | 1                 | 0                  | 5.3594                                | 5.4537                   | 5.2508           | 5.4363                     | 5.4918            | 5.1198             |
| AT4G27090 | 1                        | 0                        | 0                | 1                          | 1                 | 1                  | 5.154                                 | 5.2241                   | 5.2172           | 5.3362                     | 5.3229            | 5.2434             |
| AT4G27500 | 1                        | 0                        | 0                | 0                          | 1                 | 0                  | 4.6939                                | 4.4071                   | 4.4474           | 4.2278                     | 4.3261            | 4.1767             |
| AT4G29130 | 1                        | 1                        | 1                | 1                          | 1                 | 1                  | 4.6875                                | 4.7244                   | 4.5839           | 4.4743                     | 4.5097            | 4.6265             |
| AT4G29690 | 1                        | 1                        | 1                | 0                          | 1                 | 1                  | 4.7962                                | 5.2679                   | 4.6773           | 4.6816                     | 4.5758            | 5.2433             |
| AT4G29840 | 1                        | 1                        | 1                | 1                          | 1                 | 1                  | 4.5329                                | 4.5463                   | 4.6277           | 4.4613                     | 4.5531            | 4.4398             |
| AT4G30190 | 1                        | 1                        | 1                | 0                          | 1                 | 1                  | 5.067                                 | 5.2049                   | 4.984            | 4.8031                     | 4.8878            | 4.9867             |
| AT4G31340 | 1                        | 1                        | 1                | 1                          | 1                 | 1                  | 4.9857                                | 4.8282                   | 4.9502           | 4.7312                     | 4.7706            | 4.5413             |
| AT4G31700 | 0                        | 0                        | 0                | 0                          | 1                 | 0                  | 4.4477                                | 4.4531                   | 4.5262           | 4.7556                     | 4.7276            | 4.5424             |
| AT4G32470 | 1                        | 1                        | 1                | 0                          | 1                 | 1                  | 5.0818                                | 5.084                    | 4.9913           | 4.9382                     | 4.9608            | 4.9511             |
| AT4G33680 | 1                        | 1                        | 1                | 1                          | 1                 | 1                  | 4.5316                                | 4.5051                   | 4.5135           | 4.4507                     | 4.5509            | 4.5427             |

Supplementary Tables pertaining to Figure 2

Supplementary Table S13. Proteins found in both GeLC-MS/MS and peak-integration proteomic approaches coupled with FACS

| Locus     | GeLC-MS/MS binary values |                          |                  |                            |                   |                    | Peak-integration log intensity values |                          |                  |                            |                   |                    |
|-----------|--------------------------|--------------------------|------------------|----------------------------|-------------------|--------------------|---------------------------------------|--------------------------|------------------|----------------------------|-------------------|--------------------|
|           | Root Hairs (COBL9)       | Non-Hair Epidermis (WER) | Cortex (CORT EX) | Endodermis/Quiescent (SCR) | Vasculature (WOL) | Columnella (PET11) | Root Hairs (COBL9)                    | Non-Hair Epidermis (WER) | Cortex (CORT EX) | Endodermis/Quiescent (SCR) | Vasculature (WOL) | Columnella (PET11) |
| AT4G34200 | 1                        | 1                        | 1                | 1                          | 1                 | 1                  | 5.675                                 | 5.6575                   | 5.8032           | 5.639                      | 5.652             | 5.6439             |
| AT4G34450 | 1                        | 1                        | 1                | 1                          | 1                 | 1                  | 4.6361                                | 4.6799                   | 4.883            | 4.8056                     | 4.7926            | 4.8423             |
| AT4G34670 | 0                        | 0                        | 0                | 1                          | 1                 | 0                  | 3.5027                                | 3.4451                   | 3.4687           | 3.7811                     | 3.7258            | 3.585              |
| AT4G34870 | 1                        | 1                        | 1                | 1                          | 1                 | 1                  | 4.8598                                | 4.9691                   | 5.0564           | 5.1146                     | 4.9769            | 5.3747             |
| AT4G35090 | 1                        | 1                        | 1                | 1                          | 1                 | 1                  | 5.0527                                | 5.0496                   | 5.0797           | 4.7672                     | 4.8482            | 5.2645             |
| AT4G35100 | 1                        | 1                        | 1                | 1                          | 1                 | 1                  | 4.476                                 | 4.3355                   | 4.8199           | 4.7087                     | 4.5672            | 4.0719             |
| AT4G35630 | 1                        | 0                        | 1                | 1                          | 1                 | 1                  | 4.941                                 | 5.0277                   | 5.2299           | 5.0287                     | 5.0216            | 5.0884             |
| AT4G37910 | 1                        | 1                        | 1                | 1                          | 1                 | 1                  | 5.599                                 | 5.4984                   | 5.3624           | 5.331                      | 5.4615            | 5.2293             |
| AT4G38510 | 1                        | 1                        | 1                | 0                          | 1                 | 1                  | 4.9208                                | 4.8143                   | 4.8748           | 4.685                      | 4.7787            | 4.6379             |
| AT4G38740 | 1                        | 0                        | 1                | 1                          | 1                 | 1                  | 5.2921                                | 5.3395                   | 5.5419           | 5.5646                     | 5.5587            | 5.598              |
| AT4G39260 | 1                        | 0                        | 0                | 1                          | 1                 | 1                  | 4.6902                                | 4.6175                   | 4.7743           | 4.987                      | 4.9994            | 4.784              |
| AT4G39980 | 1                        | 1                        | 1                | 0                          | 1                 | 0                  | 4.6671                                | 4.6774                   | 4.8616           | 4.6525                     | 4.6177            | 4.4674             |
| AT5G02500 | 1                        | 1                        | 1                | 1                          | 1                 | 1                  | 6.0607                                | 5.9649                   | 6.048            | 6.088                      | 6.0833            | 6.0653             |
| AT5G02870 | 1                        | 0                        | 0                | 0                          | 1                 | 0                  | 4.5237                                | 4.5426                   | 4.5943           | 4.8027                     | 4.8265            | 4.6761             |
| AT5G03160 | 1                        | 1                        | 1                | 0                          | 1                 | 1                  | 4.2493                                | 4.0983                   | 3.8785           | 3.9901                     | 3.9701            | 4.06               |
| AT5G05170 | 1                        | 1                        | 1                | 1                          | 1                 | 0                  | 4.181                                 | 4.1135                   | 4.4428           | 4.1384                     | 4.1788            | 3.8188             |
| AT5G07350 | 1                        | 0                        | 0                | 0                          | 0                 | 0                  | 4.262                                 | 4.326                    | 4.4335           | 4.366                      | 4.336             | 4.3017             |
| AT5G07440 | 1                        | 1                        | 1                | 1                          | 1                 | 1                  | 5.3248                                | 5.3553                   | 5.0598           | 4.7531                     | 5.0378            | 5.255              |
| AT5G08300 | 1                        | 1                        | 1                | 1                          | 1                 | 1                  | 4.7184                                | 4.5519                   | 4.4052           | 4.3227                     | 4.4671            | 4.4793             |
| AT5G08530 | 1                        | 1                        | 1                | 1                          | 1                 | 1                  | 4.9701                                | 5.0115                   | 4.9132           | 4.8288                     | 4.8201            | 4.8779             |
| AT5G08670 | 0                        | 0                        | 0                | 0                          | 1                 | 0                  | 6.2722                                | 6.2788                   | 6.2426           | 6.1358                     | 6.1548            | 6.1494             |
| AT5G09590 | 1                        | 1                        | 1                | 1                          | 1                 | 1                  | 5.1222                                | 5.026                    | 4.9514           | 4.9099                     | 4.9953            | 4.9118             |
| AT5G09810 | 1                        | 1                        | 0                | 1                          | 1                 | 1                  | 4.9713                                | 4.8854                   | 5.0453           | 5.1143                     | 5.1249            | 4.926              |
| AT5G11520 | 1                        | 1                        | 1                | 0                          | 1                 | 1                  | 4.5216                                | 4.4099                   | 4.5433           | 4.3754                     | 4.547             | 4.5842             |
| AT5G11560 | 1                        | 1                        | 1                | 1                          | 1                 | 1                  | 5.2009                                | 5.1692                   | 5.1053           | 5.0443                     | 5.0062            | 4.9488             |
| AT5G11770 | 1                        | 1                        | 1                | 1                          | 1                 | 1                  | 4.6907                                | 4.733                    | 4.4593           | 4.5806                     | 4.6323            | 4.5679             |
| AT5G13420 | 1                        | 1                        | 1                | 1                          | 1                 | 1                  | 4.7427                                | 4.7394                   | 4.9989           | 4.8942                     | 4.7622            | 4.6776             |

Supplementary Tables pertaining to Figure 2

Supplementary Table S13. Proteins found in both GeLC-MS/MS and peak-integration proteomic approaches coupled with FACS

| Locus     | GeLC-MS/MS binary values |                          |                  |                            |                   |                    | Peak-integration log intensity values |                          |                  |                            |                   |                    |
|-----------|--------------------------|--------------------------|------------------|----------------------------|-------------------|--------------------|---------------------------------------|--------------------------|------------------|----------------------------|-------------------|--------------------|
|           | Root Hairs (COBL9)       | Non-Hair Epidermis (WER) | Cortex (CORT EX) | Endodermis/Quiescent (SCR) | Vasculature (WOL) | Columnella (PET11) | Root Hairs (COBL9)                    | Non-Hair Epidermis (WER) | Cortex (CORT EX) | Endodermis/Quiescent (SCR) | Vasculature (WOL) | Columnella (PET11) |
| AT5G13450 | 1                        | 1                        | 1                | 1                          | 1                 | 1                  | 5.4446                                | 5.4135                   | 5.297            | 5.2833                     | 5.2887            | 5.1892             |
| AT5G13710 | 1                        | 1                        | 1                | 1                          | 1                 | 1                  | 4.7216                                | 4.6641                   | 5.1517           | 5.0927                     | 4.7632            | 4.5055             |
| AT5G14030 | 1                        | 1                        | 1                | 1                          | 1                 | 1                  | 5.2844                                | 5.2454                   | 5.2145           | 5.0886                     | 5.1049            | 4.9258             |
| AT5G14040 | 1                        | 1                        | 1                | 1                          | 1                 | 1                  | 5.3556                                | 5.315                    | 5.2356           | 5.1566                     | 5.2202            | 5.1975             |
| AT5G15090 | 1                        | 1                        | 1                | 1                          | 1                 | 1                  | 5.8086                                | 5.8374                   | 5.7249           | 5.673                      | 5.6689            | 5.5175             |
| AT5G15200 | 1                        | 0                        | 0                | 1                          | 1                 | 1                  | 5.011                                 | 5.0296                   | 5.1263           | 5.3166                     | 5.3144            | 5.0957             |
| AT5G15490 | 0                        | 0                        | 0                | 0                          | 0                 | 1                  | 4.6517                                | 4.6082                   | 4.7426           | 4.752                      | 4.8633            | 5.0968             |
| AT5G15520 | 0                        | 0                        | 0                | 0                          | 0                 | 1                  | 5.0788                                | 5.1244                   | 5.1271           | 5.3795                     | 5.1985            | 5.0804             |
| AT5G15650 | 1                        | 1                        | 1                | 1                          | 1                 | 1                  | 5.4914                                | 5.4101                   | 5.3763           | 5.4464                     | 5.4531            | 5.8287             |
| AT5G16130 | 1                        | 0                        | 0                | 1                          | 0                 | 0                  | 4.6018                                | 4.6827                   | 4.7459           | 4.8483                     | 4.7581            | 4.6171             |
| AT5G16390 | 1                        | 0                        | 0                | 0                          | 0                 | 0                  | 4.7288                                | 4.7242                   | 4.8433           | 4.795                      | 4.6995            | 4.6157             |
| AT5G17770 | 1                        | 1                        | 1                | 1                          | 1                 | 1                  | 4.9422                                | 4.9774                   | 5.0638           | 5.1211                     | 4.9845            | 4.8421             |
| AT5G17920 | 1                        | 1                        | 1                | 1                          | 1                 | 1                  | 5.6811                                | 5.6952                   | 5.9072           | 6.0074                     | 5.9189            | 6.0626             |
| AT5G18380 | 0                        | 0                        | 0                | 1                          | 1                 | 1                  | 4.4741                                | 4.5457                   | 4.6995           | 4.8725                     | 4.8075            | 4.6319             |
| AT5G19510 | 1                        | 0                        | 0                | 0                          | 1                 | 0                  | 4.8497                                | 4.7981                   | 5.001            | 5.0809                     | 5.0379            | 4.8625             |
| AT5G19760 | 1                        | 1                        | 1                | 1                          | 1                 | 1                  | 5.5621                                | 5.5536                   | 5.5725           | 5.4297                     | 5.4172            | 5.5644             |
| AT5G20290 | 1                        | 1                        | 0                | 1                          | 1                 | 0                  | 5.4335                                | 5.4168                   | 5.5477           | 5.7212                     | 5.6863            | 5.4879             |
| AT5G20720 | 1                        | 1                        | 1                | 1                          | 1                 | 1                  | 5.2557                                | 5.2684                   | 5.3165           | 5.2688                     | 5.2301            | 5.254              |
| AT5G20890 | 0                        | 0                        | 0                | 1                          | 1                 | 0                  | 4.152                                 | 4.1506                   | 4.3069           | 4.4619                     | 4.4457            | 4.2758             |
| AT5G20980 | 1                        | 0                        | 0                | 0                          | 0                 | 0                  | 5.1308                                | 5.1246                   | 5.405            | 5.504                      | 5.338             | 5.5135             |
| AT5G22880 | 1                        | 0                        | 1                | 0                          | 1                 | 1                  | 5.3018                                | 5.4661                   | 5.3473           | 5.3372                     | 5.3714            | 5.3721             |
| AT5G23300 | 1                        | 1                        | 1                | 1                          | 1                 | 1                  | 4.4402                                | 4.4646                   | 4.3728           | 4.3924                     | 4.4167            | 4.2794             |
| AT5G23820 | 1                        | 1                        | 1                | 0                          | 1                 | 1                  | 4.9953                                | 5.4862                   | 4.6988           | 4.6035                     | 4.6454            | 5.7432             |
| AT5G25100 | 1                        | 1                        | 1                | 0                          | 1                 | 1                  | 5.3517                                | 5.3354                   | 5.3355           | 5.1753                     | 5.1567            | 5.1417             |
| AT5G26260 | 1                        | 1                        | 1                | 1                          | 1                 | 1                  | 5.7521                                | 5.6522                   | 4.842            | 4.7997                     | 5.3183            | 5.3447             |
| AT5G26280 | 1                        | 1                        | 1                | 1                          | 0                 | 1                  | 4.3434                                | 4.0864                   | 3.5868           | 3.7906                     | 3.8446            | 3.8584             |
| AT5G26360 | 0                        | 0                        | 0                | 1                          | 1                 | 0                  | 4.1691                                | 4.2912                   | 4.431            | 4.4674                     | 4.4568            | 4.4006             |

Supplementary Tables pertaining to Figure 2

Supplementary Table S13. Proteins found in both GeLC-MS/MS and peak-integration proteomic approaches coupled with FACS

| Locus     | GeLC-MS/MS binary values |                          |                  |                            |                   |                    | Peak-integration log intensity values |                          |                  |                            |                   |                    |
|-----------|--------------------------|--------------------------|------------------|----------------------------|-------------------|--------------------|---------------------------------------|--------------------------|------------------|----------------------------|-------------------|--------------------|
|           | Root Hairs (COBL9)       | Non-Hair Epidermis (WER) | Cortex (CORT EX) | Endodermis/Quiescent (SCR) | Vasculature (WOL) | Columnella (PET11) | Root Hairs (COBL9)                    | Non-Hair Epidermis (WER) | Cortex (CORT EX) | Endodermis/Quiescent (SCR) | Vasculature (WOL) | Columnella (PET11) |
| AT5G27670 | 0                        | 0                        | 0                | 0                          | 0                 | 1                  | 4.3318                                | 4.5947                   | 4.305            | 4.3696                     | 4.3824            | 4.7496             |
| AT5G28060 | 0                        | 0                        | 0                | 1                          | 1                 | 0                  | 4.8221                                | 4.8558                   | 4.9314           | 5.1344                     | 5.0793            | 4.8795             |
| AT5G28540 | 1                        | 1                        | 1                | 1                          | 1                 | 1                  | 5.3369                                | 5.1344                   | 5.1363           | 5.0197                     | 5.117             | 5.1899             |
| AT5G35360 | 1                        | 1                        | 1                | 1                          | 1                 | 1                  | 5.368                                 | 5.3857                   | 5.5498           | 5.4695                     | 5.3266            | 5.2268             |
| AT5G35630 | 1                        | 1                        | 1                | 1                          | 1                 | 1                  | 5.0746                                | 4.9099                   | 4.6781           | 4.455                      | 4.8256            | 4.8091             |
| AT5G35940 | 1                        | 1                        | 0                | 0                          | 1                 | 1                  | 4.558                                 | 5.0478                   | 4.0844           | 4.1224                     | 4.255             | 4.5952             |
| AT5G37510 | 1                        | 1                        | 1                | 1                          | 1                 | 1                  | 5.4447                                | 5.4567                   | 5.3778           | 5.3006                     | 5.2893            | 5.284              |
| AT5G38480 | 1                        | 1                        | 0                | 1                          | 1                 | 1                  | 4.6577                                | 4.7412                   | 4.906            | 5.0553                     | 4.9957            | 5.2305             |
| AT5G38530 | 1                        | 1                        | 1                | 0                          | 0                 | 0                  | 4.2323                                | 4.3374                   | 4.2582           | 3.9762                     | 4.1382            | 4.3268             |
| AT5G39320 | 1                        | 0                        | 0                | 0                          | 1                 | 0                  | 3.8965                                | 3.585                    | 3.7541           | 3.9777                     | 4.0409            | 3.7308             |
| AT5G39740 | 0                        | 0                        | 0                | 0                          | 1                 | 0                  | 5.0808                                | 5.1046                   | 5.1815           | 5.3055                     | 5.3289            | 5.098              |
| AT5G40770 | 1                        | 1                        | 1                | 1                          | 1                 | 1                  | 4.2862                                | 4.3845                   | 4.2067           | 4.1715                     | 3.8804            | 4.2406             |
| AT5G42020 | 1                        | 1                        | 1                | 1                          | 1                 | 1                  | 6.2818                                | 6.1113                   | 6.0026           | 5.9738                     | 6.021             | 6.1321             |
| AT5G42020 | 1                        | 1                        | 1                | 1                          | 1                 | 1                  | 4.4413                                | 4.3303                   | 4.3882           | 4.5366                     | 4.5033            | 4.3306             |
| AT5G42080 | 1                        | 1                        | 1                | 1                          | 1                 | 1                  | 4.4594                                | 4.3819                   | 4.3763           | 4.3086                     | 4.3306            | 4.3056             |
| AT5G42960 | 1                        | 1                        | 1                | 1                          | 1                 | 1                  | 3.995                                 | 4.0853                   | 4.0793           | 4.0153                     | 3.9008            | 3.675              |
| AT5G42980 | 1                        | 1                        | 1                | 0                          | 1                 | 1                  | 4.8301                                | 4.9631                   | 5.049            | 5.1798                     | 5.1175            | 5.3696             |
| AT5G43060 | 1                        | 1                        | 1                | 1                          | 1                 | 1                  | 4.6008                                | 4.6899                   | 4.7141           | 4.533                      | 4.4568            | 4.8492             |
| AT5G44020 | 1                        | 1                        | 1                | 0                          | 1                 | 1                  | 4.9493                                | 4.4697                   | 4.3956           | 4.4859                     | 4.6599            | 4.0657             |
| AT5G47030 | 1                        | 1                        | 0                | 1                          | 1                 | 1                  | 5.1663                                | 5.077                    | 5.0317           | 4.9713                     | 4.974             | 4.8571             |
| AT5G47770 | 1                        | 0                        | 1                | 1                          | 1                 | 0                  | 4.0541                                | 4.1116                   | 4.4567           | 4.398                      | 4.1997            | 4.2351             |
| AT5G47990 | 1                        | 1                        | 1                | 0                          | 1                 | 1                  | 4.2952                                | 4.4063                   | 4.1436           | 3.3959                     | 3.9095            | 3.9733             |
| AT5G48810 | 1                        | 1                        | 1                | 0                          | 1                 | 1                  | 4.8755                                | 4.7291                   | 4.8051           | 4.5832                     | 4.4551            | 4.4536             |
| AT5G49460 | 0                        | 1                        | 0                | 1                          | 1                 | 1                  | 4.2261                                | 4.3264                   | 4.7652           | 4.7885                     | 4.5931            | 4.5574             |
| AT5G50850 | 1                        | 1                        | 1                | 1                          | 1                 | 1                  | 5.0322                                | 4.9514                   | 4.9107           | 4.8065                     | 4.9438            | 4.9994             |
| AT5G52840 | 1                        | 1                        | 1                | 1                          | 1                 | 1                  | 5.1293                                | 5.1088                   | 5.0276           | 4.9665                     | 5.0107            | 4.9853             |
| AT5G52920 | 1                        | 1                        | 1                | 1                          | 1                 | 0                  | 4.3667                                | 4.4066                   | 4.5002           | 4.5903                     | 4.4677            | 4.1385             |

Supplementary Tables pertaining to Figure 2

Supplementary Table S13. Proteins found in both GeLC-MS/MS and peak-integration proteomic approaches coupled with FACS

| Locus     | GeLC-MS/MS binary values |                          |                  |                            |                   |                   | Peak-integration log intensity values |                          |                  |                            |                   |                   |
|-----------|--------------------------|--------------------------|------------------|----------------------------|-------------------|-------------------|---------------------------------------|--------------------------|------------------|----------------------------|-------------------|-------------------|
|           | Root Hairs (COBL9)       | Non-Hair Epidermis (WER) | Cortex (CORT EX) | Endodermis/Quiescent (SCR) | Vasculature (WOL) | Columella (PET11) | Root Hairs (COBL9)                    | Non-Hair Epidermis (WER) | Cortex (CORT EX) | Endodermis/Quiescent (SCR) | Vasculature (WOL) | Columella (PET11) |
| AT5G53460 | 1                        | 1                        | 1                | 1                          | 1                 | 1                 | 4.2191                                | 4.2435                   | 3.7467           | 3.9608                     | 4.2063            | 4.3079            |
| AT5G53560 | 1                        | 1                        | 1                | 1                          | 1                 | 1                 | 5.2221                                | 5.2178                   | 5.2209           | 4.9937                     | 4.9387            | 4.9595            |
| AT5G54100 | 1                        | 1                        | 0                | 1                          | 1                 | 1                 | 4.2729                                | 4.2819                   | 4.1678           | 3.9686                     | 4.0027            | 4.2652            |
| AT5G56030 | 1                        | 0                        | 0                | 1                          | 1                 | 0                 | 5.509                                 | 5.5747                   | 5.7839           | 5.8255                     | 5.7665            | 5.6537            |
| AT5G59880 | 1                        | 0                        | 1                | 0                          | 0                 | 1                 | 3.9962                                | 4.1696                   | 4.2802           | 4.4018                     | 4.4743            | 4.6313            |
| AT5G60960 | 1                        | 0                        | 0                | 0                          | 1                 | 0                 | 4.1816                                | 4.012                    | 3.9663           | 3.9794                     | 3.9122            | 3.6564            |
| AT5G61790 | 1                        | 1                        | 1                | 1                          | 1                 | 1                 | 5.9547                                | 5.9095                   | 5.7849           | 5.7158                     | 5.7421            | 5.8655            |
| AT5G62190 | 0                        | 0                        | 0                | 0                          | 1                 | 0                 | 4.0812                                | 4.3023                   | 3.9705           | 4.2075                     | 4.254             | 3.8659            |
| AT5G62530 | 1                        | 1                        | 1                | 1                          | 1                 | 1                 | 4.2998                                | 4.3836                   | 4.2905           | 4.1599                     | 4.1962            | 4.384             |
| AT5G63400 | 1                        | 1                        | 1                | 1                          | 1                 | 1                 | 5.2564                                | 5.2215                   | 5.2192           | 5.1147                     | 5.0827            | 5.2033            |
| AT5G63510 | 1                        | 1                        | 0                | 0                          | 1                 | 0                 | 4.8769                                | 4.9133                   | 4.8363           | 4.6967                     | 4.778             | 4.7823            |
| AT5G63840 | 1                        | 1                        | 1                | 1                          | 1                 | 1                 | 4.5712                                | 4.4677                   | 4.5058           | 4.4155                     | 4.4832            | 4.4025            |
| AT5G65020 | 1                        | 1                        | 1                | 1                          | 1                 | 1                 | 4.691                                 | 4.8918                   | 4.7896           | 4.713                      | 4.6607            | 5.4369            |
| AT5G66510 | 1                        | 1                        | 1                | 1                          | 1                 | 1                 | 4.9281                                | 4.9616                   | 4.9024           | 4.7886                     | 4.7895            | 4.7803            |
| AT5G66680 | 1                        | 1                        | 1                | 1                          | 1                 | 1                 | 5.6146                                | 5.6109                   | 5.5374           | 5.4463                     | 5.4494            | 5.3617            |
| AT5G66760 | 1                        | 1                        | 1                | 1                          | 1                 | 1                 | 5.3232                                | 5.3297                   | 5.289            | 5.167                      | 5.1983            | 5.2393            |
| AT5G67500 | 1                        | 1                        | 1                | 1                          | 1                 | 1                 | 5.2982                                | 5.3013                   | 5.2772           | 5.2238                     | 5.2102            | 5.243             |
| ATMG0070  | 1                        | 1                        | 1                | 1                          | 1                 | 1                 | 4.6526                                | 4.6382                   | 4.5944           | 4.5527                     | 4.426             | 4.4415            |
| ATMG00510 | 1                        | 1                        | 1                | 1                          | 1                 | 1                 | 4.2684                                | 4.2954                   | 4.3309           | 4.1962                     | 4.1861            | 4.2528            |

**Supplementary Tables pertaining to Figure 3**

**Supplementary Table S14. Root hair proteins of this study that were also found in the root hair transcriptome studies of Jones et al. (48), Won et al. (49), or Deal et al. (50)**

| Loci in the list of 606 genes comprising the 'root-hair morphogenesis transcriptome' of Jones et al. 2006 | Loci in the list of 904 genes of Won et al. 2009 with an Root Hair Element (RHE) in their proximal promoter | Loci in the list of 638 genes of Won et al. 2009 down-regulated 2-fold in 3 root hair arrays | Loci in the list of 946 genes of Deal et al. 2009 enriched in hair versus non-hair cells (>1.3, p<0.02) |
|-----------------------------------------------------------------------------------------------------------|-------------------------------------------------------------------------------------------------------------|----------------------------------------------------------------------------------------------|---------------------------------------------------------------------------------------------------------|
|-----------------------------------------------------------------------------------------------------------|-------------------------------------------------------------------------------------------------------------|----------------------------------------------------------------------------------------------|---------------------------------------------------------------------------------------------------------|

| AND in the list of Proteins identified only in root hairs (238 proteins) by FACS coupled with GeLC-MS/MS in this study                                                    |           |           |           |
|---------------------------------------------------------------------------------------------------------------------------------------------------------------------------|-----------|-----------|-----------|
| AT2G40800                                                                                                                                                                 | AT1G14710 | AT1G30870 | AT1G30870 |
| AT3G09740                                                                                                                                                                 | AT1G19140 | AT1G63450 | AT2G19160 |
| AT3G11730                                                                                                                                                                 | AT1G63450 | AT2G37670 | AT2G37670 |
| AT3G23190                                                                                                                                                                 | AT1G75940 | AT2G47540 | AT3G53990 |
| AT4G11600                                                                                                                                                                 | AT2G18030 | AT3G01290 | AT4G16500 |
| AT4G26010                                                                                                                                                                 | AT2G34560 | AT3G23190 | AT4G26010 |
| AT4G35860                                                                                                                                                                 | AT3G01190 | AT4G09990 | AT5G04960 |
| AT5G01220                                                                                                                                                                 | AT3G27300 | AT4G26010 | AT5G49270 |
| AT5G04960                                                                                                                                                                 | AT4G27640 | AT5G04960 | AT5G59910 |
|                                                                                                                                                                           | AT4G34180 | AT5G49270 |           |
|                                                                                                                                                                           | AT5G46160 | AT5G49680 |           |
|                                                                                                                                                                           | AT5G56730 |           |           |
| AND in the list of Proteins identified in this study of whole roots sorted by FACS of wild-type and/or hairy mutant roots but not in hairless mutant roots (202 proteins) |           |           |           |
| AT2G19760                                                                                                                                                                 | AT1G20580 | AT1G58270 | AT1G04270 |
| AT4G04910                                                                                                                                                                 | AT1G58270 | AT2G38750 | AT1G18540 |
|                                                                                                                                                                           | AT1G76010 | AT3G16450 | AT1G63660 |
|                                                                                                                                                                           | AT3G02530 | AT5G47990 | AT2G09990 |
|                                                                                                                                                                           | AT3G44110 |           | AT2G21580 |
|                                                                                                                                                                           | AT5G35940 |           | AT2G27530 |
|                                                                                                                                                                           |           |           | AT2G32060 |
|                                                                                                                                                                           |           |           | AT3G11510 |
|                                                                                                                                                                           |           |           | AT3G53020 |
|                                                                                                                                                                           |           |           | AT4G21960 |
|                                                                                                                                                                           |           |           | AT4G27090 |
|                                                                                                                                                                           |           |           | AT4G39200 |
|                                                                                                                                                                           |           |           | AT5G27770 |
|                                                                                                                                                                           |           |           | AT5G35530 |
|                                                                                                                                                                           |           |           | AT5G47700 |
|                                                                                                                                                                           |           |           | AT5G67630 |

### Supplementary Tables pertaining to Figure 3

#### Supplementary Table S15. Novel candidate regulators of root hair development and function

Proteins identified only in root hairs in the Root Cellular Proteome that have available homozygous insertion lines from the Arabidopsis Biological Resource Center (ABRC)

| Locus     | Insertion Line Name |
|-----------|---------------------|
| At1g01910 | SALK_012980C        |
| At1g06890 | SALK_073566C        |
| At1g14210 | SALK_035618C        |
| At1g15710 | SALK_131009C        |
| At1g15710 | SALK_081796C        |
| At1g17160 | SALK_137479C        |
| At1g17160 | SALK_005371C        |
| At1g17890 | SALK_020145C        |
| At1g21560 | SALK_044476C        |
| At1g23170 | SALK_046821C        |
| At1g26160 | SALK_123482C        |
| At1g26160 | SALK_005997C        |
| At1g29250 | SALK_069210C        |
| At1g30450 | SALK_048175C        |
| At1g31860 | SALK_027157C        |
| At1g48230 | SALK_063985C        |
| At1g48900 | SALK_112379C        |
| At1g63450 | SALK_028024C        |
| At1g66580 | SALK_126907C        |
| At1g72280 | SALK_050000C        |
| At1g72480 | SALK_143646C        |
| At1g74910 | SALK_065562C        |
| At1g75940 | SALK_133498C        |
| At1g76690 | SALK_042219C        |
| At1g76690 | SALK_021194C        |
| At2g19860 | SALK_150524C        |
| At2g19860 | SALK_080584C        |
| At2g21250 | SALK_021705C        |
| At2g38650 | SALK_046348C        |
| At2g38650 | SALK_015189C        |
| At2g45990 | SALK_141449C        |
| At2g45990 | SALK_142699C        |
| At3g01290 | SALK_124393C        |
| At3g01290 | SALK_033877C        |
| At3g02660 | SALK_045570C        |
| At3g02660 | SALK_016722C        |
| At3g03050 | SALK_070920C        |
| At3g05420 | SALK_019656C        |
| At3g07470 | SALK_015333C        |
| At3g11170 | SALK_147096C        |
| At3g11730 | SALK_033433C        |
| At3g13460 | SALK_002225C        |
| At3g23510 | SALK_069357C        |
| At3g23510 | SALK_018286C        |
| At3g27020 | SALK_119560C        |
| At3g27020 | SALK_093392C        |
| At3g29250 | SALK_148412C        |
| At3g29250 | SALK_082262C        |
| At3g48110 | SALK_102661C        |



### Supplementary Tables pertaining to Figure 3

#### Supplementary Table S15. Novel candidate regulators of root hair development and function

Proteins identified only in root hairs in the Root Cellular Proteome that have available homozygous insertion lines from the Arabidopsis Biological Resource Center (ABRC)

|           |              |
|-----------|--------------|
| At3g48890 | SALK_056475C |
| At3g48890 | SALK_042103C |
| At3g51440 | SALK_046142C |
| At3g51980 | SALK_012739C |
| At3g52190 | SALK_147561C |
| At3g52190 | SALK_037068C |
| At3g52570 | SALK_141979C |
| At3g53180 | SALK_016332C |
| At3g54840 | SALK_004698C |
| At3g55920 | SALK_034811C |
| At3g60850 | SALK_013745C |
| At4g00710 | SALK_022072C |
| At4g04860 | SALK_067527C |
| At4g13050 | SALK_111046C |
| At4g13050 | SALK_062204C |
| At4g21540 | SALK_000250C |
| At4g21540 | SALK_022916C |
| At4g25570 | SALK_058385C |
| At4g29430 | SALK_118515C |
| At4g32880 | SALK_023733C |
| At5g04710 | SALK_035555C |
| At5g10830 | SALK_133463C |
| At5g10830 | SALK_099512C |
| At5g12200 | SALK_064708C |
| At5g12200 | SALK_038919C |
| At5g14060 | SALK_003685C |
| At5g16930 | SALK_083164C |
| At5g20490 | SALK_067972C |
| At5g22740 | SALK_149092C |
| At5g23740 | SALK_069193C |
| At5g38460 | SALK_130472C |
| At5g38460 | SALK_077252C |
| At5g43830 | SALK_016986C |
| At5g47040 | SALK_043857C |
| At5g49270 | SALK_099933C |
| At5g49270 | SALK_020771C |

**Supplementary Table S16.** Raw data output from the Trans-Proteomic Pipeline of LTQ runs performed using wild-type, *caprice triptychon*, and *werewolf myb23* mutant sorted root samples. Tranche hash:  
FbsvAjRbRcuHV0c2hF7GQ8AQq/MZUm6GaUu3ZGOQehHW6zspVtGvrvQ28rzt  
tWltW5sua/OynnxUDA68YBcPZcD4FtEAAAAAAAAAEIQ==

These raw data have been uploaded for public release and access at the Proteome Commons and are found at [www.proteomecommons.org/tranche](http://www.proteomecommons.org/tranche) under the project "The Protein Expression Landscape of the *Arabidopsis* Root". The data files for Supplementary Table S16, which includes all raw data of the proteome from whole roots of wild-type, *caprice triptychon*, or *werewolf myb23* mutants, were too large for the file formats allowed in the Supplementary Information section. Thus, these data are found at Proteome Commons under the aforementioned project title and are accessible with the following Tranche hash:

FbsvAjRbRcuHV0c2hF7GQ8AQq/MZUm6GaUu3ZGOQehHW6zspVtGvrvQ28rzt  
tWltW5sua/OynnxUDA68YBcPZcD4FtEAAAAAAAAAEIQ==

All encryption at the tranche repository should be removed, but if a passphrase is requested, it is 'arabidopsis'.

Supplementary Table S16 can also be found at the Duke Genome Express Repository at the following:

[https://discovery.genome.duke.edu/express/resources/2010/Final\\_Supplementary\\_Table\\_S16.xls](https://discovery.genome.duke.edu/express/resources/2010/Final_Supplementary_Table_S16.xls)

**Supplementary Tables pertaining to Figure 3**

**Supplementary Table S17. Root hair proteins identified in wild type, *caprice triptychon* (hairless), and *werewolf myb23* (excessively hairy) mutant sorted roots by GeLC-MS/MS proteomics**

| <b>Locus</b> | <b>wild type</b> | <b><i>caprice triptychon</i></b> | <b><i>werewolf myb23</i></b> |
|--------------|------------------|----------------------------------|------------------------------|
| AT1G01090    | 1                | 1                                | 1                            |
| AT1G01100    | 1                | 0                                | 1                            |
| AT1G01910    | 1                | 0                                | 0                            |
| AT1G02080    | 1                | 0                                | 0                            |
| AT1G02500    | 1                | 1                                | 1                            |
| AT1G02690    | 0                | 0                                | 1                            |
| AT1G02780    | 1                | 1                                | 1                            |
| AT1G02840    | 1                | 0                                | 1                            |
| AT1G03860    | 1                | 1                                | 1                            |
| AT1G04080    | 1                | 0                                | 0                            |
| AT1G04170    | 1                | 0                                | 1                            |
| AT1G04190    | 1                | 0                                | 0                            |
| AT1G04270    | 1                | 0                                | 1                            |
| AT1G04410    | 1                | 1                                | 1                            |
| AT1G04430    | 0                | 1                                | 0                            |
| AT1G04690    | 1                | 1                                | 1                            |
| AT1G05520    | 1                | 0                                | 0                            |
| AT1G06220    | 1                | 0                                | 1                            |
| AT1G06290    | 1                | 1                                | 1                            |
| AT1G06530    | 1                | 0                                | 0                            |
| AT1G06950    | 1                | 1                                | 1                            |
| AT1G07140    | 1                | 0                                | 1                            |
| AT1G07670    | 1                | 1                                | 0                            |
| AT1G07830    | 1                | 0                                | 0                            |
| AT1G07890    | 1                | 1                                | 1                            |
| AT1G08200    | 0                | 1                                | 0                            |
| AT1G08360    | 1                | 0                                | 1                            |
| AT1G08480    | 1                | 1                                | 1                            |
| AT1G08830    | 1                | 1                                | 1                            |
| AT1G09210    | 1                | 1                                | 1                            |
| AT1G09620    | 1                | 0                                | 1                            |
| AT1G09640    | 1                | 1                                | 1                            |
| AT1G09760    | 1                | 0                                | 1                            |
| AT1G09770    | 1                | 0                                | 0                            |
| AT1G09780    | 1                | 1                                | 1                            |
| AT1G09830    | 0                | 0                                | 1                            |
| AT1G10270    | 1                | 0                                | 0                            |
| AT1G10290    | 1                | 0                                | 1                            |
| AT1G10490    | 0                | 0                                | 1                            |
| AT1G10760    | 0                | 1                                | 0                            |
| AT1G10840    | 1                | 0                                | 1                            |
| AT1G10950    | 0                | 1                                | 1                            |
| AT1G11580    | 0                | 1                                | 0                            |
| AT1G11650    | 1                | 0                                | 0                            |
| AT1G11680    | 1                | 1                                | 0                            |
| AT1G11840    | 0                | 0                                | 1                            |
| AT1G11860    | 1                | 1                                | 0                            |
| AT1G11910    | 1                | 1                                | 1                            |

**Supplementary Tables pertaining to Figure 3**

**Supplementary Table S17. Root hair proteins identified in wild type, *caprice triptychon* (hairless), and *werewolf myb23* (excessively hairy) mutant sorted roots by GeLC-MS/MS proteomics**

| <b>Locus</b> | <b>wild type</b> | <b><i>caprice triptychon</i></b> | <b><i>werewolf myb23</i></b> |
|--------------|------------------|----------------------------------|------------------------------|
| AT1G12000    | 1                | 1                                | 1                            |
| AT1G12230    | 1                | 0                                | 0                            |
| AT1G12240    | 0                | 1                                | 0                            |
| AT1G12270    | 1                | 0                                | 0                            |
| AT1G12410    | 1                | 1                                | 0                            |
| AT1G12840    | 1                | 1                                | 1                            |
| AT1G13280    | 1                | 1                                | 0                            |
| AT1G14210    | 0                | 1                                | 0                            |
| AT1G14320    | 0                | 0                                | 1                            |
| AT1G14410    | 0                | 1                                | 0                            |
| AT1G14610    | 1                | 0                                | 1                            |
| AT1G14620    | 1                | 1                                | 1                            |
| AT1G14670    | 1                | 0                                | 0                            |
| AT1G14710    | 0                | 0                                | 1                            |
| AT1G14810    | 0                | 1                                | 1                            |
| AT1G14830    | 1                | 1                                | 1                            |
| AT1G14850    | 1                | 0                                | 0                            |
| AT1G14980    | 1                | 0                                | 0                            |
| AT1G15210    | 0                | 1                                | 0                            |
| AT1G15390    | 1                | 0                                | 0                            |
| AT1G15500    | 1                | 1                                | 1                            |
| AT1G15690    | 1                | 1                                | 1                            |
| AT1G15930    | 1                | 1                                | 1                            |
| AT1G16300    | 0                | 1                                | 0                            |
| AT1G16350    | 1                | 0                                | 1                            |
| AT1G16870    | 0                | 0                                | 1                            |
| AT1G17290    | 1                | 0                                | 1                            |
| AT1G17470    | 1                | 0                                | 0                            |
| AT1G17880    | 1                | 0                                | 1                            |
| AT1G18080    | 1                | 1                                | 1                            |
| AT1G18210    | 1                | 0                                | 0                            |
| AT1G18500    | 1                | 0                                | 1                            |
| AT1G18540    | 1                | 0                                | 1                            |
| AT1G18850    | 1                | 0                                | 1                            |
| AT1G19360    | 1                | 0                                | 1                            |
| AT1G19580    | 0                | 0                                | 1                            |
| AT1G19880    | 1                | 0                                | 0                            |
| AT1G20010    | 1                | 0                                | 0                            |
| AT1G20200    | 1                | 0                                | 1                            |
| AT1G20220    | 0                | 0                                | 1                            |
| AT1G20330    | 1                | 1                                | 1                            |
| AT1G20440    | 0                | 1                                | 0                            |
| AT1G20450    | 0                | 1                                | 0                            |
| AT1G20580    | 1                | 0                                | 1                            |
| AT1G20630    | 0                | 1                                | 0                            |
| AT1G20950    | 1                | 1                                | 1                            |
| AT1G20960    | 1                | 0                                | 1                            |
| AT1G21160    | 0                | 1                                | 0                            |

**Supplementary Tables pertaining to Figure 3**

**Supplementary Table S17. Root hair proteins identified in wild type, *caprice triptychon* (hairless), and *werewolf myb23* (excessively hairy) mutant sorted roots by GeLC-MS/MS proteomics**

| <b>Locus</b> | <b>wild type</b> | <b><i>caprice triptychon</i></b> | <b><i>werewolf myb23</i></b> |
|--------------|------------------|----------------------------------|------------------------------|
| AT1G21730    | 1                | 0                                | 0                            |
| AT1G21750    | 1                | 1                                | 1                            |
| AT1G22300    | 1                | 1                                | 1                            |
| AT1G22410    | 1                | 1                                | 1                            |
| AT1G22440    | 0                | 0                                | 1                            |
| AT1G22450    | 1                | 1                                | 1                            |
| AT1G23190    | 1                | 1                                | 0                            |
| AT1G23290    | 1                | 0                                | 0                            |
| AT1G23820    | 1                | 1                                | 1                            |
| AT1G24180    | 1                | 1                                | 1                            |
| AT1G24360    | 1                | 1                                | 1                            |
| AT1G24510    | 1                | 1                                | 1                            |
| AT1G25350    | 1                | 0                                | 0                            |
| AT1G25490    | 1                | 1                                | 1                            |
| AT1G26460    | 1                | 1                                | 1                            |
| AT1G26630    | 1                | 1                                | 1                            |
| AT1G26850    | 1                | 1                                | 1                            |
| AT1G26940    | 1                | 1                                | 1                            |
| AT1G27090    | 1                | 0                                | 0                            |
| AT1G27130    | 1                | 0                                | 0                            |
| AT1G27390    | 1                | 0                                | 0                            |
| AT1G27400    | 0                | 0                                | 1                            |
| AT1G27450    | 1                | 0                                | 1                            |
| AT1G27930    | 0                | 0                                | 1                            |
| AT1G27970    | 0                | 0                                | 1                            |
| AT1G28290    | 1                | 1                                | 0                            |
| AT1G29150    | 1                | 0                                | 1                            |
| AT1G29880    | 1                | 0                                | 1                            |
| AT1G29900    | 1                | 1                                | 1                            |
| AT1G29940    | 0                | 0                                | 1                            |
| AT1G30230    | 1                | 0                                | 1                            |
| AT1G30400    | 0                | 0                                | 1                            |
| AT1G30580    | 1                | 1                                | 1                            |
| AT1G30630    | 1                | 1                                | 1                            |
| AT1G31180    | 1                | 1                                | 0                            |
| AT1G31230    | 1                | 0                                | 0                            |
| AT1G31850    | 1                | 0                                | 1                            |
| AT1G31970    | 1                | 0                                | 0                            |
| AT1G32230    | 1                | 0                                | 0                            |
| AT1G32380    | 1                | 0                                | 0                            |
| AT1G33750    | 0                | 1                                | 0                            |
| AT1G34130    | 1                | 1                                | 1                            |
| AT1G34430    | 1                | 1                                | 1                            |
| AT1G35160    | 1                | 1                                | 1                            |
| AT1G35620    | 1                | 1                                | 0                            |
| AT1G35720    | 1                | 1                                | 1                            |
| AT1G43170    | 1                | 1                                | 1                            |
| AT1G43890    | 0                | 1                                | 0                            |

**Supplementary Tables pertaining to Figure 3**

**Supplementary Table S17. Root hair proteins identified in wild type, *caprice triptychon* (hairless), and *werewolf myb23* (excessively hairy) mutant sorted roots by GeLC-MS/MS proteomics**

| <b>Locus</b> | <b>wild type</b> | <b><i>caprice triptychon</i></b> | <b><i>werewolf myb23</i></b> |
|--------------|------------------|----------------------------------|------------------------------|
| AT1G44170    | 0                | 1                                | 0                            |
| AT1G44835    | 1                | 0                                | 0                            |
| AT1G45332    | 0                | 0                                | 1                            |
| AT1G47260    | 1                | 1                                | 1                            |
| AT1G47290    | 1                | 0                                | 0                            |
| AT1G47420    | 1                | 1                                | 1                            |
| AT1G47600    | 0                | 1                                | 0                            |
| AT1G48030    | 1                | 1                                | 1                            |
| AT1G48410    | 1                | 0                                | 0                            |
| AT1G48630    | 1                | 1                                | 1                            |
| AT1G48830    | 1                | 0                                | 1                            |
| AT1G48850    | 0                | 1                                | 0                            |
| AT1G48860    | 1                | 0                                | 0                            |
| AT1G48900    | 1                | 0                                | 0                            |
| AT1G48920    | 1                | 1                                | 1                            |
| AT1G49600    | 1                | 0                                | 1                            |
| AT1G49760    | 1                | 0                                | 1                            |
| AT1G50060    | 0                | 1                                | 0                            |
| AT1G50200    | 1                | 1                                | 0                            |
| AT1G50380    | 1                | 0                                | 0                            |
| AT1G50430    | 1                | 0                                | 0                            |
| AT1G50920    | 1                | 0                                | 1                            |
| AT1G51710    | 0                | 0                                | 1                            |
| AT1G51980    | 1                | 1                                | 1                            |
| AT1G52060    | 1                | 0                                | 0                            |
| AT1G52070    | 0                | 1                                | 1                            |
| AT1G52360    | 0                | 1                                | 0                            |
| AT1G52600    | 1                | 0                                | 0                            |
| AT1G52670    | 0                | 0                                | 1                            |
| AT1G52980    | 1                | 0                                | 0                            |
| AT1G53240    | 1                | 1                                | 1                            |
| AT1G53260    | 0                | 0                                | 1                            |
| AT1G53310    | 1                | 1                                | 1                            |
| AT1G53390    | 1                | 0                                | 0                            |
| AT1G53645    | 1                | 0                                | 0                            |
| AT1G53750    | 1                | 0                                | 1                            |
| AT1G53850    | 1                | 0                                | 0                            |
| AT1G54000    | 1                | 1                                | 1                            |
| AT1G54010    | 1                | 1                                | 1                            |
| AT1G54030    | 1                | 0                                | 1                            |
| AT1G54080    | 1                | 0                                | 0                            |
| AT1G54270    | 1                | 0                                | 0                            |
| AT1G55160    | 1                | 0                                | 0                            |
| AT1G55440    | 1                | 0                                | 0                            |
| AT1G55490    | 1                | 1                                | 1                            |
| AT1G55890    | 1                | 1                                | 1                            |
| AT1G56070    | 1                | 1                                | 1                            |
| AT1G56110    | 1                | 1                                | 1                            |

**Supplementary Tables pertaining to Figure 3**

**Supplementary Table S17. Root hair proteins identified in wild type, *caprice triptychon* (hairless), and *werewolf myb23* (excessively hairy) mutant sorted roots by GeLC-MS/MS proteomics**

| <b>Locus</b> | <b>wild type</b> | <b><i>caprice triptychon</i></b> | <b><i>werewolf myb23</i></b> |
|--------------|------------------|----------------------------------|------------------------------|
| AT1G56330    | 1                | 0                                | 0                            |
| AT1G56340    | 1                | 1                                | 1                            |
| AT1G56410    | 1                | 0                                | 0                            |
| AT1G56450    | 1                | 1                                | 1                            |
| AT1G57720    | 1                | 1                                | 1                            |
| AT1G58080    | 0                | 1                                | 0                            |
| AT1G58270    | 1                | 0                                | 1                            |
| AT1G59610    | 1                | 1                                | 0                            |
| AT1G59900    | 0                | 1                                | 0                            |
| AT1G59990    | 1                | 0                                | 0                            |
| AT1G60770    | 0                | 1                                | 1                            |
| AT1G61580    | 0                | 0                                | 1                            |
| AT1G61790    | 0                | 1                                | 1                            |
| AT1G61870    | 1                | 1                                | 0                            |
| AT1G62020    | 0                | 0                                | 1                            |
| AT1G62330    | 0                | 1                                | 0                            |
| AT1G62640    | 1                | 1                                | 0                            |
| AT1G62660    | 1                | 0                                | 0                            |
| AT1G62740    | 1                | 0                                | 0                            |
| AT1G63000    | 1                | 0                                | 1                            |
| AT1G63660    | 1                | 0                                | 1                            |
| AT1G63770    | 1                | 1                                | 1                            |
| AT1G63780    | 0                | 1                                | 1                            |
| AT1G63940    | 1                | 1                                | 1                            |
| AT1G64190    | 1                | 1                                | 1                            |
| AT1G64520    | 1                | 1                                | 1                            |
| AT1G64650    | 0                | 1                                | 0                            |
| AT1G64790    | 1                | 1                                | 1                            |
| AT1G64880    | 1                | 0                                | 1                            |
| AT1G65270    | 1                | 1                                | 1                            |
| AT1G65930    | 1                | 1                                | 1                            |
| AT1G65980    | 0                | 0                                | 1                            |
| AT1G66270    | 1                | 1                                | 1                            |
| AT1G66280    | 1                | 1                                | 1                            |
| AT1G66430    | 0                | 1                                | 0                            |
| AT1G67430    | 1                | 0                                | 0                            |
| AT1G67490    | 1                | 0                                | 0                            |
| AT1G67730    | 1                | 1                                | 1                            |
| AT1G69830    | 0                | 1                                | 0                            |
| AT1G70310    | 1                | 0                                | 1                            |
| AT1G70730    | 0                | 0                                | 1                            |
| AT1G70770    | 1                | 1                                | 1                            |
| AT1G71220    | 1                | 1                                | 1                            |
| AT1G71260    | 1                | 1                                | 0                            |
| AT1G72370    | 1                | 1                                | 1                            |
| AT1G72440    | 1                | 0                                | 0                            |
| AT1G72550    | 1                | 0                                | 0                            |
| AT1G72730    | 1                | 0                                | 0                            |

**Supplementary Tables pertaining to Figure 3**

**Supplementary Table S17. Root hair proteins identified in wild type, *caprice triptychon* (hairless), and *werewolf myb23* (excessively hairy) mutant sorted roots by GeLC-MS/MS proteomics**

| <b>Locus</b> | <b>wild type</b> | <b><i>caprice triptychon</i></b> | <b><i>werewolf myb23</i></b> |
|--------------|------------------|----------------------------------|------------------------------|
| AT1G72750    | 1                | 1                                | 1                            |
| AT1G73230    | 1                | 0                                | 1                            |
| AT1G73970    | 0                | 1                                | 0                            |
| AT1G74020    | 0                | 1                                | 0                            |
| AT1G74030    | 1                | 1                                | 1                            |
| AT1G74230    | 1                | 0                                | 1                            |
| AT1G74260    | 1                | 1                                | 0                            |
| AT1G74380    | 0                | 0                                | 1                            |
| AT1G74560    | 1                | 1                                | 1                            |
| AT1G74920    | 0                | 1                                | 0                            |
| AT1G75200    | 0                | 0                                | 1                            |
| AT1G75330    | 1                | 1                                | 0                            |
| AT1G76010    | 1                | 0                                | 1                            |
| AT1G76090    | 1                | 1                                | 1                            |
| AT1G76400    | 0                | 1                                | 0                            |
| AT1G77510    | 1                | 1                                | 1                            |
| AT1G77590    | 0                | 1                                | 1                            |
| AT1G77940    | 1                | 1                                | 1                            |
| AT1G78300    | 1                | 1                                | 0                            |
| AT1G78380    | 1                | 1                                | 1                            |
| AT1G78570    | 1                | 0                                | 0                            |
| AT1G78660    | 1                | 0                                | 0                            |
| AT1G78900    | 1                | 1                                | 1                            |
| AT1G78920    | 1                | 0                                | 1                            |
| AT1G79010    | 1                | 0                                | 1                            |
| AT1G79230    | 0                | 1                                | 0                            |
| AT1G79280    | 0                | 0                                | 1                            |
| AT1G79440    | 1                | 1                                | 1                            |
| AT1G79530    | 1                | 1                                | 1                            |
| AT1G79550    | 1                | 1                                | 1                            |
| AT1G79750    | 1                | 1                                | 1                            |
| AT1G79920    | 1                | 0                                | 1                            |
| AT1G79930    | 1                | 1                                | 1                            |
| AT1G79940    | 1                | 1                                | 1                            |
| AT1G79990    | 0                | 0                                | 1                            |
| AT1G80070    | 1                | 0                                | 1                            |
| AT1G80270    | 1                | 1                                | 1                            |
| AT1G80410    | 1                | 0                                | 1                            |
| AT1G80560    | 1                | 1                                | 1                            |
| AT1G80600    | 1                | 1                                | 1                            |
| AT2G01140    | 1                | 1                                | 1                            |
| AT2G01250    | 1                | 1                                | 1                            |
| AT2G01470    | 1                | 1                                | 1                            |
| AT2G01720    | 1                | 1                                | 1                            |
| AT2G02050    | 0                | 1                                | 0                            |
| AT2G02560    | 0                | 0                                | 1                            |
| AT2G02740    | 0                | 1                                | 0                            |
| AT2G03120    | 1                | 1                                | 1                            |



**Supplementary Tables pertaining to Figure 3**

**Supplementary Table S17. Root hair proteins identified in wild type, *caprice triptychon* (hairless), and *werewolf myb23* (excessively hairy) mutant sorted roots by GeLC-MS/MS proteomics**

| Locus     | wild type | <i>caprice triptychon</i> | <i>werewolf myb23</i> |
|-----------|-----------|---------------------------|-----------------------|
| AT2G03510 | 1         | 0                         | 1                     |
| AT2G03820 | 1         | 0                         | 0                     |
| AT2G04030 | 1         | 1                         | 1                     |
| AT2G04280 | 1         | 0                         | 0                     |
| AT2G04400 | 1         | 1                         | 0                     |
| AT2G05710 | 1         | 1                         | 1                     |
| AT2G05840 | 0         | 1                         | 0                     |
| AT2G05990 | 1         | 1                         | 1                     |
| AT2G06990 | 1         | 0                         | 0                     |
| AT2G07050 | 1         | 1                         | 1                     |
| AT2G09990 | 1         | 0                         | 1                     |
| AT2G14170 | 1         | 1                         | 1                     |
| AT2G16570 | 1         | 0                         | 1                     |
| AT2G16600 | 1         | 1                         | 1                     |
| AT2G16950 | 1         | 0                         | 0                     |
| AT2G17130 | 1         | 1                         | 0                     |
| AT2G17265 | 1         | 1                         | 0                     |
| AT2G17420 | 1         | 1                         | 1                     |
| AT2G17630 | 1         | 1                         | 1                     |
| AT2G18020 | 1         | 1                         | 1                     |
| AT2G18110 | 1         | 0                         | 0                     |
| AT2G18330 | 0         | 1                         | 1                     |
| AT2G18900 | 1         | 0                         | 1                     |
| AT2G18960 | 0         | 1                         | 0                     |
| AT2G19080 | 0         | 1                         | 0                     |
| AT2G19480 | 0         | 0                         | 1                     |
| AT2G19730 | 1         | 1                         | 1                     |
| AT2G19760 | 1         | 0                         | 1                     |
| AT2G19940 | 1         | 1                         | 1                     |
| AT2G20060 | 1         | 1                         | 1                     |
| AT2G20360 | 1         | 1                         | 1                     |
| AT2G20420 | 1         | 1                         | 1                     |
| AT2G20450 | 1         | 0                         | 0                     |
| AT2G20530 | 1         | 0                         | 0                     |
| AT2G20580 | 1         | 1                         | 1                     |
| AT2G20990 | 1         | 1                         | 0                     |
| AT2G21160 | 1         | 0                         | 1                     |
| AT2G21170 | 1         | 1                         | 1                     |
| AT2G21390 | 1         | 1                         | 1                     |
| AT2G21580 | 1         | 0                         | 1                     |
| AT2G21660 | 1         | 1                         | 1                     |
| AT2G21870 | 1         | 1                         | 1                     |
| AT2G22230 | 1         | 1                         | 0                     |
| AT2G22250 | 0         | 1                         | 0                     |
| AT2G22780 | 1         | 1                         | 0                     |
| AT2G22795 | 0         | 1                         | 0                     |
| AT2G23350 | 1         | 0                         | 1                     |
| AT2G24200 | 1         | 1                         | 1                     |

**Supplementary Tables pertaining to Figure 3**

**Supplementary Table S17. Root hair proteins identified in wild type, *caprice triptychon* (hairless), and *werewolf myb23* (excessively hairy) mutant sorted roots by GeLC-MS/MS proteomics**

| <b>Locus</b> | <b>wild type</b> | <b><i>caprice triptychon</i></b> | <b><i>werewolf myb23</i></b> |
|--------------|------------------|----------------------------------|------------------------------|
| AT2G25110    | 0                | 0                                | 1                            |
| AT2G25280    | 1                | 0                                | 0                            |
| AT2G25970    | 1                | 0                                | 1                            |
| AT2G25980    | 1                | 0                                | 1                            |
| AT2G26080    | 1                | 1                                | 1                            |
| AT2G26140    | 1                | 1                                | 0                            |
| AT2G27020    | 1                | 1                                | 1                            |
| AT2G27530    | 1                | 0                                | 1                            |
| AT2G27710    | 1                | 0                                | 1                            |
| AT2G27720    | 1                | 1                                | 1                            |
| AT2G27730    | 1                | 1                                | 1                            |
| AT2G27840    | 1                | 0                                | 0                            |
| AT2G27860    | 1                | 0                                | 0                            |
| AT2G28000    | 1                | 1                                | 1                            |
| AT2G28430    | 1                | 1                                | 1                            |
| AT2G29080    | 1                | 0                                | 0                            |
| AT2G29550    | 1                | 1                                | 1                            |
| AT2G30050    | 1                | 0                                | 1                            |
| AT2G30110    | 1                | 1                                | 1                            |
| AT2G30200    | 1                | 1                                | 1                            |
| AT2G30490    | 0                | 1                                | 0                            |
| AT2G30860    | 1                | 1                                | 1                            |
| AT2G30870    | 1                | 1                                | 1                            |
| AT2G30970    | 1                | 1                                | 1                            |
| AT2G31390    | 1                | 1                                | 1                            |
| AT2G31660    | 1                | 0                                | 0                            |
| AT2G31810    | 1                | 1                                | 1                            |
| AT2G32060    | 1                | 0                                | 1                            |
| AT2G32730    | 1                | 1                                | 0                            |
| AT2G32920    | 1                | 1                                | 1                            |
| AT2G33040    | 1                | 1                                | 1                            |
| AT2G33150    | 1                | 1                                | 1                            |
| AT2G33210    | 1                | 1                                | 1                            |
| AT2G33220    | 1                | 1                                | 1                            |
| AT2G33340    | 1                | 0                                | 1                            |
| AT2G33410    | 1                | 0                                | 1                            |
| AT2G33845    | 0                | 0                                | 1                            |
| AT2G34357    | 1                | 0                                | 0                            |
| AT2G34480    | 1                | 1                                | 1                            |
| AT2G34590    | 1                | 1                                | 0                            |
| AT2G34630    | 0                | 1                                | 0                            |
| AT2G35040    | 1                | 1                                | 1                            |
| AT2G35720    | 0                | 0                                | 1                            |
| AT2G36070    | 0                | 1                                | 0                            |
| AT2G36250    | 1                | 0                                | 0                            |
| AT2G36390    | 0                | 1                                | 0                            |
| AT2G36460    | 1                | 0                                | 1                            |
| AT2G36530    | 1                | 1                                | 1                            |

**Supplementary Tables pertaining to Figure 3**

**Supplementary Table S17. Root hair proteins identified in wild type, *caprice triptychon* (hairless), and *werewolf myb23* (excessively hairy) mutant sorted roots by GeLC-MS/MS proteomics**

| <b>Locus</b> | <b>wild type</b> | <b><i>caprice triptychon</i></b> | <b><i>werewolf myb23</i></b> |
|--------------|------------------|----------------------------------|------------------------------|
| AT2G36850    | 0                | 1                                | 0                            |
| AT2G36880    | 1                | 0                                | 0                            |
| AT2G37170    | 0                | 1                                | 0                            |
| AT2G37220    | 1                | 0                                | 0                            |
| AT2G37230    | 1                | 1                                | 0                            |
| AT2G37250    | 1                | 0                                | 0                            |
| AT2G37690    | 1                | 1                                | 1                            |
| AT2G37990    | 1                | 0                                | 0                            |
| AT2G38040    | 1                | 1                                | 1                            |
| AT2G38750    | 1                | 0                                | 1                            |
| AT2G38770    | 1                | 0                                | 0                            |
| AT2G39800    | 1                | 0                                | 0                            |
| AT2G39960    | 0                | 1                                | 1                            |
| AT2G39990    | 1                | 1                                | 1                            |
| AT2G40010    | 1                | 1                                | 0                            |
| AT2G40290    | 1                | 1                                | 0                            |
| AT2G40360    | 1                | 0                                | 0                            |
| AT2G40510    | 1                | 0                                | 1                            |
| AT2G40660    | 0                | 0                                | 1                            |
| AT2G41220    | 1                | 1                                | 0                            |
| AT2G41530    | 1                | 0                                | 1                            |
| AT2G41840    | 1                | 1                                | 1                            |
| AT2G42210    | 1                | 1                                | 1                            |
| AT2G42710    | 1                | 0                                | 1                            |
| AT2G42910    | 1                | 0                                | 1                            |
| AT2G43090    | 1                | 1                                | 1                            |
| AT2G43710    | 1                | 1                                | 1                            |
| AT2G43750    | 1                | 1                                | 1                            |
| AT2G43950    | 0                | 0                                | 1                            |
| AT2G44060    | 1                | 0                                | 0                            |
| AT2G44100    | 0                | 0                                | 1                            |
| AT2G44120    | 1                | 1                                | 1                            |
| AT2G44350    | 1                | 1                                | 1                            |
| AT2G44610    | 0                | 1                                | 1                            |
| AT2G44640    | 1                | 0                                | 0                            |
| AT2G44790    | 0                | 1                                | 0                            |
| AT2G44860    | 0                | 0                                | 1                            |
| AT2G45030    | 1                | 0                                | 0                            |
| AT2G45060    | 0                | 0                                | 1                            |
| AT2G45290    | 1                | 0                                | 0                            |
| AT2G45300    | 0                | 1                                | 0                            |
| AT2G45440    | 1                | 1                                | 0                            |
| AT2G45790    | 1                | 1                                | 0                            |
| AT2G45990    | 0                | 1                                | 0                            |
| AT2G46140    | 1                | 0                                | 0                            |
| AT2G46280    | 1                | 1                                | 1                            |
| AT2G46520    | 1                | 1                                | 1                            |
| AT2G47000    | 1                | 0                                | 0                            |

**Supplementary Tables pertaining to Figure 3**

**Supplementary Table S17. Root hair proteins identified in wild type, *caprice triptychon* (hairless), and *werewolf myb23* (excessively hairy) mutant sorted roots by GeLC-MS/MS proteomics**

| Locus     | wild type | <i>caprice triptychon</i> | <i>werewolf myb23</i> |
|-----------|-----------|---------------------------|-----------------------|
| AT2G47250 | 1         | 0                         | 1                     |
| AT2G47470 | 1         | 1                         | 1                     |
| AT2G47510 | 1         | 1                         | 1                     |
| AT2G47610 | 1         | 0                         | 1                     |
| AT2G47650 | 1         | 1                         | 1                     |
| AT2G47730 | 1         | 1                         | 1                     |
| AT2G47800 | 0         | 1                         | 0                     |
| AT2G47990 | 1         | 0                         | 0                     |
| AT3G01120 | 1         | 1                         | 1                     |
| AT3G01280 | 1         | 1                         | 1                     |
| AT3G01540 | 1         | 0                         | 0                     |
| AT3G01910 | 0         | 0                         | 1                     |
| AT3G02080 | 1         | 0                         | 1                     |
| AT3G02090 | 1         | 1                         | 1                     |
| AT3G02200 | 1         | 1                         | 1                     |
| AT3G02230 | 1         | 1                         | 1                     |
| AT3G02320 | 0         | 0                         | 1                     |
| AT3G02360 | 1         | 1                         | 0                     |
| AT3G02520 | 1         | 1                         | 1                     |
| AT3G02530 | 1         | 0                         | 1                     |
| AT3G02560 | 0         | 0                         | 1                     |
| AT3G02650 | 1         | 1                         | 1                     |
| AT3G02760 | 1         | 0                         | 1                     |
| AT3G02780 | 1         | 1                         | 0                     |
| AT3G03100 | 1         | 1                         | 0                     |
| AT3G03250 | 1         | 1                         | 1                     |
| AT3G03600 | 0         | 1                         | 0                     |
| AT3G03640 | 0         | 1                         | 0                     |
| AT3G03780 | 1         | 0                         | 0                     |
| AT3G03920 | 1         | 0                         | 1                     |
| AT3G03960 | 1         | 1                         | 1                     |
| AT3G04080 | 0         | 1                         | 0                     |
| AT3G04120 | 1         | 1                         | 1                     |
| AT3G04600 | 1         | 0                         | 1                     |
| AT3G04830 | 0         | 1                         | 0                     |
| AT3G04840 | 1         | 1                         | 1                     |
| AT3G04920 | 1         | 1                         | 1                     |
| AT3G05060 | 1         | 0                         | 1                     |
| AT3G05230 | 0         | 1                         | 0                     |
| AT3G05420 | 1         | 0                         | 0                     |
| AT3G05560 | 1         | 1                         | 1                     |
| AT3G05970 | 1         | 0                         | 0                     |
| AT3G06050 | 1         | 1                         | 1                     |
| AT3G06350 | 0         | 1                         | 0                     |
| AT3G06530 | 1         | 0                         | 1                     |
| AT3G06720 | 0         | 0                         | 1                     |
| AT3G06860 | 0         | 1                         | 1                     |
| AT3G07050 | 1         | 0                         | 0                     |

**Supplementary Tables pertaining to Figure 3**

**Supplementary Table S17. Root hair proteins identified in wild type, *caprice triptychon* (hairless), and *werewolf myb23* (excessively hairy) mutant sorted roots by GeLC-MS/MS proteomics**

| Locus     | wild type | <i>caprice triptychon</i> | <i>werewolf myb23</i> |
|-----------|-----------|---------------------------|-----------------------|
| AT3G07100 | 1         | 0                         | 0                     |
| AT3G07110 | 1         | 1                         | 1                     |
| AT3G07160 | 1         | 0                         | 0                     |
| AT3G07480 | 1         | 1                         | 1                     |
| AT3G07770 | 1         | 1                         | 1                     |
| AT3G08530 | 0         | 0                         | 1                     |
| AT3G08580 | 1         | 1                         | 1                     |
| AT3G08590 | 1         | 1                         | 0                     |
| AT3G08943 | 1         | 1                         | 0                     |
| AT3G09200 | 1         | 1                         | 1                     |
| AT3G09260 | 1         | 1                         | 1                     |
| AT3G09440 | 1         | 1                         | 1                     |
| AT3G09630 | 1         | 1                         | 1                     |
| AT3G09820 | 1         | 1                         | 1                     |
| AT3G09840 | 1         | 1                         | 0                     |
| AT3G09940 | 0         | 0                         | 1                     |
| AT3G10050 | 1         | 0                         | 1                     |
| AT3G10690 | 1         | 1                         | 0                     |
| AT3G10920 | 1         | 1                         | 0                     |
| AT3G11070 | 1         | 1                         | 1                     |
| AT3G11130 | 1         | 1                         | 0                     |
| AT3G11400 | 0         | 0                         | 1                     |
| AT3G11510 | 1         | 0                         | 1                     |
| AT3G11630 | 1         | 1                         | 1                     |
| AT3G11710 | 1         | 0                         | 0                     |
| AT3G11830 | 1         | 1                         | 1                     |
| AT3G11910 | 1         | 0                         | 1                     |
| AT3G11940 | 0         | 0                         | 1                     |
| AT3G11964 | 1         | 0                         | 1                     |
| AT3G12260 | 1         | 1                         | 1                     |
| AT3G12390 | 1         | 0                         | 1                     |
| AT3G12670 | 1         | 0                         | 1                     |
| AT3G12780 | 0         | 1                         | 1                     |
| AT3G13160 | 1         | 1                         | 1                     |
| AT3G13235 | 1         | 0                         | 0                     |
| AT3G13300 | 0         | 1                         | 0                     |
| AT3G13460 | 1         | 0                         | 1                     |
| AT3G13580 | 1         | 1                         | 1                     |
| AT3G13772 | 1         | 1                         | 1                     |
| AT3G13860 | 1         | 1                         | 1                     |
| AT3G13870 | 1         | 1                         | 1                     |
| AT3G13920 | 1         | 0                         | 1                     |
| AT3G13930 | 1         | 1                         | 1                     |
| AT3G14067 | 0         | 1                         | 0                     |
| AT3G14220 | 0         | 1                         | 0                     |
| AT3G14290 | 0         | 0                         | 1                     |
| AT3G14390 | 1         | 1                         | 1                     |
| AT3G14550 | 0         | 1                         | 0                     |

**Supplementary Tables pertaining to Figure 3**

**Supplementary Table S17. Root hair proteins identified in wild type, *caprice triptychon* (hairless), and *werewolf myb23* (excessively hairy) mutant sorted roots by GeLC-MS/MS proteomics**

| <b>Locus</b> | <b>wild type</b> | <b><i>caprice triptychon</i></b> | <b><i>werewolf myb23</i></b> |
|--------------|------------------|----------------------------------|------------------------------|
| AT3G14600    | 1                | 0                                | 0                            |
| AT3G14990    | 1                | 0                                | 0                            |
| AT3G15000    | 1                | 0                                | 1                            |
| AT3G15020    | 0                | 1                                | 0                            |
| AT3G15090    | 1                | 1                                | 1                            |
| AT3G15290    | 0                | 0                                | 1                            |
| AT3G15730    | 1                | 1                                | 1                            |
| AT3G15950    | 1                | 1                                | 1                            |
| AT3G16110    | 1                | 1                                | 1                            |
| AT3G16410    | 1                | 1                                | 1                            |
| AT3G16420    | 1                | 1                                | 1                            |
| AT3G16430    | 1                | 0                                | 0                            |
| AT3G16450    | 1                | 0                                | 1                            |
| AT3G16460    | 1                | 1                                | 1                            |
| AT3G16480    | 0                | 1                                | 1                            |
| AT3G16640    | 1                | 1                                | 1                            |
| AT3G16780    | 1                | 0                                | 0                            |
| AT3G16950    | 1                | 1                                | 1                            |
| AT3G17240    | 1                | 1                                | 1                            |
| AT3G17390    | 1                | 1                                | 1                            |
| AT3G17810    | 1                | 1                                | 1                            |
| AT3G17820    | 1                | 0                                | 1                            |
| AT3G17940    | 1                | 0                                | 0                            |
| AT3G18000    | 1                | 0                                | 1                            |
| AT3G18130    | 1                | 1                                | 1                            |
| AT3G18190    | 1                | 1                                | 1                            |
| AT3G18580    | 1                | 1                                | 1                            |
| AT3G18600    | 1                | 0                                | 1                            |
| AT3G19170    | 1                | 1                                | 0                            |
| AT3G19760    | 1                | 1                                | 0                            |
| AT3G19820    | 1                | 1                                | 1                            |
| AT3G20000    | 1                | 1                                | 1                            |
| AT3G20050    | 1                | 1                                | 1                            |
| AT3G20330    | 0                | 0                                | 1                            |
| AT3G20370    | 1                | 1                                | 1                            |
| AT3G20390    | 1                | 1                                | 1                            |
| AT3G20940    | 0                | 0                                | 1                            |
| AT3G21110    | 1                | 1                                | 0                            |
| AT3G21140    | 0                | 1                                | 0                            |
| AT3G21540    | 1                | 0                                | 0                            |
| AT3G22110    | 1                | 1                                | 1                            |
| AT3G22200    | 0                | 0                                | 1                            |
| AT3G22310    | 1                | 0                                | 1                            |
| AT3G22330    | 1                | 0                                | 1                            |
| AT3G22630    | 1                | 0                                | 0                            |
| AT3G22660    | 1                | 0                                | 1                            |
| AT3G22890    | 1                | 0                                | 0                            |
| AT3G22960    | 1                | 1                                | 1                            |

**Supplementary Tables pertaining to Figure 3**

**Supplementary Table S17. Root hair proteins identified in wild type, *caprice triptychon* (hairless), and *werewolf myb23* (excessively hairy) mutant sorted roots by GeLC-MS/MS proteomics**

| Locus     | wild type | <i>caprice triptychon</i> | <i>werewolf myb23</i> |
|-----------|-----------|---------------------------|-----------------------|
| AT3G23620 | 1         | 0                         | 1                     |
| AT3G23830 | 1         | 0                         | 1                     |
| AT3G23940 | 0         | 0                         | 1                     |
| AT3G23990 | 1         | 1                         | 1                     |
| AT3G24170 | 0         | 0                         | 1                     |
| AT3G24830 | 1         | 1                         | 1                     |
| AT3G25110 | 0         | 1                         | 0                     |
| AT3G25140 | 0         | 1                         | 0                     |
| AT3G25230 | 1         | 0                         | 0                     |
| AT3G25520 | 1         | 0                         | 1                     |
| AT3G25530 | 1         | 0                         | 0                     |
| AT3G25780 | 1         | 1                         | 0                     |
| AT3G25860 | 1         | 1                         | 1                     |
| AT3G26340 | 0         | 0                         | 1                     |
| AT3G26520 | 0         | 1                         | 1                     |
| AT3G26720 | 1         | 1                         | 0                     |
| AT3G27240 | 1         | 1                         | 1                     |
| AT3G27280 | 1         | 1                         | 0                     |
| AT3G27380 | 0         | 1                         | 0                     |
| AT3G27430 | 1         | 0                         | 0                     |
| AT3G27570 | 1         | 0                         | 0                     |
| AT3G27740 | 1         | 1                         | 0                     |
| AT3G28710 | 1         | 0                         | 1                     |
| AT3G28715 | 0         | 1                         | 0                     |
| AT3G28720 | 0         | 1                         | 0                     |
| AT3G29320 | 0         | 1                         | 0                     |
| AT3G29360 | 1         | 0                         | 0                     |
| AT3G42050 | 1         | 1                         | 1                     |
| AT3G44110 | 1         | 0                         | 1                     |
| AT3G44320 | 1         | 0                         | 0                     |
| AT3G44330 | 1         | 1                         | 1                     |
| AT3G44340 | 1         | 0                         | 1                     |
| AT3G44750 | 1         | 0                         | 1                     |
| AT3G45450 | 1         | 0                         | 0                     |
| AT3G46740 | 1         | 1                         | 1                     |
| AT3G46940 | 1         | 0                         | 0                     |
| AT3G47370 | 1         | 1                         | 1                     |
| AT3G47520 | 1         | 1                         | 1                     |
| AT3G47930 | 0         | 0                         | 1                     |
| AT3G48000 | 1         | 1                         | 1                     |
| AT3G48140 | 0         | 1                         | 1                     |
| AT3G48170 | 1         | 1                         | 0                     |
| AT3G48340 | 0         | 1                         | 1                     |
| AT3G48410 | 1         | 1                         | 1                     |
| AT3G48560 | 1         | 1                         | 1                     |
| AT3G48680 | 1         | 1                         | 1                     |
| AT3G48870 | 1         | 0                         | 1                     |
| AT3G48890 | 1         | 0                         | 0                     |

**Supplementary Tables pertaining to Figure 3**

**Supplementary Table S17. Root hair proteins identified in wild type, *caprice triptychon* (hairless), and *werewolf myb23* (excessively hairy) mutant sorted roots by GeLC-MS/MS proteomics**

| <b>Locus</b> | <b>wild type</b> | <b><i>caprice triptychon</i></b> | <b><i>werewolf myb23</i></b> |
|--------------|------------------|----------------------------------|------------------------------|
| AT3G48930    | 1                | 0                                | 0                            |
| AT3G49010    | 1                | 1                                | 1                            |
| AT3G49080    | 1                | 0                                | 1                            |
| AT3G49100    | 0                | 0                                | 1                            |
| AT3G49240    | 1                | 1                                | 1                            |
| AT3G49430    | 0                | 0                                | 1                            |
| AT3G49560    | 1                | 1                                | 0                            |
| AT3G49680    | 1                | 1                                | 1                            |
| AT3G49720    | 1                | 1                                | 1                            |
| AT3G49910    | 1                | 1                                | 1                            |
| AT3G51260    | 1                | 1                                | 1                            |
| AT3G51800    | 1                | 1                                | 1                            |
| AT3G52140    | 1                | 0                                | 1                            |
| AT3G52200    | 0                | 1                                | 0                            |
| AT3G52300    | 1                | 1                                | 1                            |
| AT3G52930    | 1                | 1                                | 1                            |
| AT3G52960    | 1                | 1                                | 1                            |
| AT3G53020    | 1                | 0                                | 1                            |
| AT3G53180    | 1                | 0                                | 0                            |
| AT3G53520    | 1                | 1                                | 0                            |
| AT3G53580    | 1                | 1                                | 0                            |
| AT3G53740    | 0                | 1                                | 0                            |
| AT3G53870    | 1                | 0                                | 1                            |
| AT3G53990    | 1                | 0                                | 0                            |
| AT3G54110    | 1                | 1                                | 1                            |
| AT3G54470    | 1                | 0                                | 1                            |
| AT3G54640    | 0                | 1                                | 0                            |
| AT3G54960    | 1                | 1                                | 1                            |
| AT3G55010    | 1                | 0                                | 0                            |
| AT3G55360    | 0                | 1                                | 1                            |
| AT3G55410    | 1                | 1                                | 1                            |
| AT3G55440    | 1                | 1                                | 1                            |
| AT3G55620    | 1                | 0                                | 1                            |
| AT3G55920    | 1                | 0                                | 0                            |
| AT3G56070    | 1                | 0                                | 1                            |
| AT3G56150    | 1                | 1                                | 1                            |
| AT3G56190    | 1                | 0                                | 1                            |
| AT3G56490    | 0                | 0                                | 1                            |
| AT3G57000    | 1                | 0                                | 0                            |
| AT3G57010    | 1                | 1                                | 1                            |
| AT3G57150    | 1                | 1                                | 1                            |
| AT3G57290    | 1                | 1                                | 1                            |
| AT3G57610    | 1                | 1                                | 1                            |
| AT3G57650    | 0                | 1                                | 0                            |
| AT3G57660    | 1                | 0                                | 0                            |
| AT3G57940    | 1                | 0                                | 0                            |
| AT3G58510    | 1                | 0                                | 1                            |
| AT3G58610    | 1                | 1                                | 1                            |



**Supplementary Tables pertaining to Figure 3**

**Supplementary Table S17. Root hair proteins identified in wild type, *caprice triptychon* (hairless), and *werewolf myb23* (excessively hairy) mutant sorted roots by GeLC-MS/MS proteomics**

| Locus     | wild type | <i>caprice triptychon</i> | <i>werewolf myb23</i> |
|-----------|-----------|---------------------------|-----------------------|
| AT3G58730 | 0         | 0                         | 1                     |
| AT3G58750 | 0         | 1                         | 0                     |
| AT3G59020 | 1         | 0                         | 1                     |
| AT3G59650 | 1         | 0                         | 1                     |
| AT3G59760 | 1         | 1                         | 1                     |
| AT3G59920 | 1         | 0                         | 1                     |
| AT3G59970 | 1         | 1                         | 0                     |
| AT3G60750 | 1         | 1                         | 1                     |
| AT3G60820 | 1         | 0                         | 1                     |
| AT3G61070 | 1         | 1                         | 0                     |
| AT3G61440 | 0         | 1                         | 1                     |
| AT3G62030 | 0         | 1                         | 1                     |
| AT3G62120 | 1         | 0                         | 1                     |
| AT3G62360 | 1         | 1                         | 1                     |
| AT3G62530 | 1         | 1                         | 1                     |
| AT3G62830 | 0         | 0                         | 1                     |
| AT3G62870 | 1         | 1                         | 0                     |
| AT3G63130 | 1         | 0                         | 0                     |
| AT3G63460 | 1         | 1                         | 1                     |
| AT4G00100 | 1         | 1                         | 1                     |
| AT4G00490 | 0         | 1                         | 0                     |
| AT4G00570 | 1         | 1                         | 1                     |
| AT4G00620 | 1         | 1                         | 1                     |
| AT4G00860 | 1         | 1                         | 1                     |
| AT4G01100 | 1         | 1                         | 1                     |
| AT4G01320 | 0         | 1                         | 1                     |
| AT4G01850 | 1         | 1                         | 1                     |
| AT4G01900 | 1         | 0                         | 0                     |
| AT4G02150 | 1         | 0                         | 0                     |
| AT4G02230 | 0         | 0                         | 1                     |
| AT4G02450 | 1         | 0                         | 0                     |
| AT4G02510 | 0         | 1                         | 0                     |
| AT4G02580 | 1         | 1                         | 1                     |
| AT4G02620 | 1         | 0                         | 0                     |
| AT4G02930 | 1         | 1                         | 1                     |
| AT4G04910 | 1         | 0                         | 1                     |
| AT4G04940 | 1         | 0                         | 0                     |
| AT4G05020 | 0         | 1                         | 0                     |
| AT4G05390 | 0         | 1                         | 0                     |
| AT4G05410 | 1         | 0                         | 0                     |
| AT4G05530 | 0         | 1                         | 0                     |
| AT4G07410 | 1         | 0                         | 0                     |
| AT4G08390 | 1         | 0                         | 0                     |
| AT4G09000 | 1         | 1                         | 1                     |
| AT4G09020 | 0         | 1                         | 0                     |
| AT4G09320 | 1         | 1                         | 1                     |
| AT4G10320 | 1         | 0                         | 1                     |
| AT4G10450 | 1         | 0                         | 1                     |

**Supplementary Tables pertaining to Figure 3**

**Supplementary Table S17. Root hair proteins identified in wild type, *caprice triptychon* (hairless), and *werewolf myb23* (excessively hairy) mutant sorted roots by GeLC-MS/MS proteomics**

| <b>Locus</b> | <b>wild type</b> | <b><i>caprice triptychon</i></b> | <b><i>werewolf myb23</i></b> |
|--------------|------------------|----------------------------------|------------------------------|
| AT4G10480    | 1                | 1                                | 1                            |
| AT4G11010    | 0                | 1                                | 0                            |
| AT4G11120    | 1                | 1                                | 1                            |
| AT4G11150    | 1                | 1                                | 1                            |
| AT4G11260    | 1                | 0                                | 0                            |
| AT4G11420    | 1                | 1                                | 1                            |
| AT4G11820    | 1                | 0                                | 0                            |
| AT4G12130    | 1                | 0                                | 0                            |
| AT4G12590    | 1                | 0                                | 0                            |
| AT4G12600    | 1                | 0                                | 1                            |
| AT4G12650    | 1                | 1                                | 1                            |
| AT4G13430    | 1                | 1                                | 1                            |
| AT4G13780    | 1                | 0                                | 1                            |
| AT4G13850    | 1                | 0                                | 0                            |
| AT4G13930    | 1                | 1                                | 1                            |
| AT4G13940    | 1                | 1                                | 1                            |
| AT4G14030    | 1                | 0                                | 1                            |
| AT4G14160    | 1                | 0                                | 0                            |
| AT4G14570    | 1                | 0                                | 0                            |
| AT4G14800    | 0                | 1                                | 1                            |
| AT4G14880    | 1                | 0                                | 0                            |
| AT4G15000    | 1                | 0                                | 1                            |
| AT4G16143    | 1                | 0                                | 1                            |
| AT4G16155    | 1                | 1                                | 1                            |
| AT4G16450    | 0                | 0                                | 1                            |
| AT4G16660    | 1                | 1                                | 1                            |
| AT4G16760    | 1                | 1                                | 1                            |
| AT4G17040    | 0                | 1                                | 0                            |
| AT4G17520    | 1                | 0                                | 1                            |
| AT4G17770    | 1                | 0                                | 0                            |
| AT4G18030    | 1                | 1                                | 1                            |
| AT4G18100    | 1                | 1                                | 1                            |
| AT4G18440    | 0                | 1                                | 0                            |
| AT4G19030    | 0                | 1                                | 0                            |
| AT4G19120    | 0                | 1                                | 0                            |
| AT4G20020    | 1                | 0                                | 1                            |
| AT4G20360    | 1                | 1                                | 1                            |
| AT4G20850    | 1                | 1                                | 1                            |
| AT4G20890    | 1                | 0                                | 0                            |
| AT4G20980    | 1                | 0                                | 0                            |
| AT4G21150    | 1                | 1                                | 1                            |
| AT4G21960    | 1                | 0                                | 1                            |
| AT4G22670    | 1                | 0                                | 1                            |
| AT4G23460    | 1                | 0                                | 0                            |
| AT4G23540    | 1                | 0                                | 0                            |
| AT4G23590    | 0                | 0                                | 1                            |
| AT4G23620    | 0                | 0                                | 1                            |
| AT4G23650    | 1                | 0                                | 1                            |

**Supplementary Tables pertaining to Figure 3**

**Supplementary Table S17. Root hair proteins identified in wild type, *caprice triptychon* (hairless), and *werewolf myb23* (excessively hairy) mutant sorted roots by GeLC-MS/MS proteomics**

| <b>Locus</b> | <b>wild type</b> | <b><i>caprice triptychon</i></b> | <b><i>werewolf myb23</i></b> |
|--------------|------------------|----------------------------------|------------------------------|
| AT4G23850    | 1                | 0                                | 0                            |
| AT4G24190    | 1                | 1                                | 1                            |
| AT4G24280    | 1                | 1                                | 1                            |
| AT4G24330    | 1                | 1                                | 0                            |
| AT4G24620    | 1                | 1                                | 1                            |
| AT4G24800    | 1                | 0                                | 0                            |
| AT4G24820    | 1                | 0                                | 0                            |
| AT4G24830    | 1                | 1                                | 1                            |
| AT4G25550    | 1                | 0                                | 1                            |
| AT4G25630    | 1                | 1                                | 1                            |
| AT4G25740    | 1                | 1                                | 1                            |
| AT4G26110    | 1                | 1                                | 1                            |
| AT4G26300    | 1                | 0                                | 1                            |
| AT4G26410    | 1                | 0                                | 0                            |
| AT4G26780    | 1                | 1                                | 1                            |
| AT4G26900    | 1                | 1                                | 1                            |
| AT4G26910    | 0                | 1                                | 0                            |
| AT4G26970    | 1                | 1                                | 0                            |
| AT4G27080    | 0                | 1                                | 0                            |
| AT4G27090    | 1                | 0                                | 1                            |
| AT4G27500    | 1                | 0                                | 0                            |
| AT4G27585    | 1                | 0                                | 1                            |
| AT4G27760    | 0                | 1                                | 0                            |
| AT4G28360    | 0                | 0                                | 1                            |
| AT4G28440    | 1                | 0                                | 0                            |
| AT4G28470    | 1                | 1                                | 0                            |
| AT4G28510    | 1                | 1                                | 1                            |
| AT4G29010    | 0                | 1                                | 0                            |
| AT4G29130    | 1                | 1                                | 1                            |
| AT4G29350    | 1                | 1                                | 1                            |
| AT4G29410    | 1                | 1                                | 1                            |
| AT4G29510    | 0                | 0                                | 1                            |
| AT4G29690    | 1                | 1                                | 1                            |
| AT4G29840    | 1                | 1                                | 1                            |
| AT4G30010    | 0                | 1                                | 0                            |
| AT4G30190    | 1                | 0                                | 1                            |
| AT4G30920    | 1                | 0                                | 1                            |
| AT4G30930    | 1                | 0                                | 0                            |
| AT4G30990    | 1                | 0                                | 1                            |
| AT4G31120    | 1                | 0                                | 1                            |
| AT4G31180    | 1                | 0                                | 1                            |
| AT4G31300    | 1                | 1                                | 1                            |
| AT4G31340    | 1                | 1                                | 1                            |
| AT4G31480    | 0                | 1                                | 0                            |
| AT4G31490    | 1                | 0                                | 0                            |
| AT4G31500    | 0                | 1                                | 0                            |
| AT4G31700    | 1                | 0                                | 1                            |
| AT4G31810    | 1                | 1                                | 1                            |

**Supplementary Tables pertaining to Figure 3**

**Supplementary Table S17. Root hair proteins identified in wild type, *caprice triptychon* (hairless), and *werewolf myb23* (excessively hairy) mutant sorted roots by GeLC-MS/MS proteomics**

| <b>Locus</b> | <b>wild type</b> | <b><i>caprice triptychon</i></b> | <b><i>werewolf myb23</i></b> |
|--------------|------------------|----------------------------------|------------------------------|
| AT4G31990    | 1                | 1                                | 1                            |
| AT4G32470    | 1                | 1                                | 0                            |
| AT4G32520    | 1                | 1                                | 1                            |
| AT4G32720    | 1                | 0                                | 1                            |
| AT4G33090    | 1                | 1                                | 1                            |
| AT4G33120    | 0                | 1                                | 1                            |
| AT4G33250    | 1                | 1                                | 0                            |
| AT4G33360    | 1                | 1                                | 1                            |
| AT4G33580    | 1                | 1                                | 1                            |
| AT4G33650    | 1                | 0                                | 0                            |
| AT4G33680    | 1                | 1                                | 1                            |
| AT4G34110    | 1                | 1                                | 1                            |
| AT4G34200    | 1                | 1                                | 1                            |
| AT4G34450    | 1                | 1                                | 1                            |
| AT4G34670    | 1                | 0                                | 1                            |
| AT4G34700    | 1                | 1                                | 1                            |
| AT4G34870    | 1                | 1                                | 1                            |
| AT4G35000    | 1                | 1                                | 1                            |
| AT4G35090    | 1                | 1                                | 1                            |
| AT4G35100    | 1                | 1                                | 1                            |
| AT4G35260    | 1                | 1                                | 1                            |
| AT4G35490    | 1                | 0                                | 0                            |
| AT4G35630    | 1                | 1                                | 1                            |
| AT4G35830    | 1                | 0                                | 1                            |
| AT4G35850    | 1                | 1                                | 1                            |
| AT4G35860    | 1                | 0                                | 0                            |
| AT4G36680    | 1                | 0                                | 0                            |
| AT4G37400    | 0                | 0                                | 1                            |
| AT4G37640    | 1                | 0                                | 0                            |
| AT4G37830    | 1                | 0                                | 1                            |
| AT4G37910    | 1                | 1                                | 1                            |
| AT4G38220    | 1                | 1                                | 1                            |
| AT4G38350    | 1                | 0                                | 1                            |
| AT4G38510    | 1                | 1                                | 1                            |
| AT4G38630    | 1                | 0                                | 0                            |
| AT4G38680    | 1                | 0                                | 1                            |
| AT4G38740    | 1                | 1                                | 1                            |
| AT4G39080    | 1                | 1                                | 1                            |
| AT4G39200    | 1                | 0                                | 1                            |
| AT4G39260    | 1                | 0                                | 1                            |
| AT4G39520    | 1                | 0                                | 1                            |
| AT4G39660    | 1                | 1                                | 1                            |
| AT4G39680    | 1                | 0                                | 0                            |
| AT4G39690    | 0                | 0                                | 1                            |
| AT4G39880    | 0                | 0                                | 1                            |
| AT4G39980    | 1                | 1                                | 1                            |
| AT5G02050    | 1                | 0                                | 0                            |
| AT5G02490    | 1                | 0                                | 0                            |

**Supplementary Tables pertaining to Figure 3**

**Supplementary Table S17. Root hair proteins identified in wild type, *caprice triptychon* (hairless), and *werewolf myb23* (excessively hairy) mutant sorted roots by GeLC-MS/MS proteomics**

| <b>Locus</b> | <b>wild type</b> | <b><i>caprice triptychon</i></b> | <b><i>werewolf myb23</i></b> |
|--------------|------------------|----------------------------------|------------------------------|
| AT5G02500    | 1                | 1                                | 1                            |
| AT5G02740    | 1                | 0                                | 1                            |
| AT5G02870    | 1                | 1                                | 1                            |
| AT5G03160    | 0                | 0                                | 1                            |
| AT5G03290    | 1                | 1                                | 1                            |
| AT5G03300    | 1                | 0                                | 1                            |
| AT5G03630    | 1                | 1                                | 1                            |
| AT5G04430    | 1                | 1                                | 1                            |
| AT5G04590    | 1                | 1                                | 1                            |
| AT5G04600    | 1                | 0                                | 1                            |
| AT5G04990    | 0                | 1                                | 0                            |
| AT5G05000    | 1                | 0                                | 1                            |
| AT5G05010    | 1                | 1                                | 1                            |
| AT5G05170    | 0                | 1                                | 0                            |
| AT5G05470    | 1                | 0                                | 0                            |
| AT5G05780    | 1                | 1                                | 1                            |
| AT5G06060    | 1                | 0                                | 0                            |
| AT5G06110    | 1                | 0                                | 0                            |
| AT5G06460    | 1                | 0                                | 0                            |
| AT5G07340    | 0                | 1                                | 1                            |
| AT5G07350    | 1                | 1                                | 1                            |
| AT5G07440    | 1                | 1                                | 1                            |
| AT5G08060    | 1                | 1                                | 1                            |
| AT5G08180    | 0                | 0                                | 1                            |
| AT5G08300    | 1                | 1                                | 1                            |
| AT5G08530    | 1                | 1                                | 1                            |
| AT5G09590    | 1                | 1                                | 1                            |
| AT5G09650    | 1                | 1                                | 1                            |
| AT5G09810    | 1                | 1                                | 1                            |
| AT5G09900    | 1                | 0                                | 1                            |
| AT5G10160    | 0                | 1                                | 0                            |
| AT5G10360    | 1                | 0                                | 0                            |
| AT5G10450    | 1                | 0                                | 1                            |
| AT5G10540    | 1                | 0                                | 0                            |
| AT5G10730    | 1                | 0                                | 1                            |
| AT5G10840    | 0                | 0                                | 1                            |
| AT5G10860    | 0                | 1                                | 1                            |
| AT5G11520    | 0                | 1                                | 0                            |
| AT5G11560    | 1                | 1                                | 1                            |
| AT5G11670    | 1                | 0                                | 0                            |
| AT5G11770    | 1                | 1                                | 1                            |
| AT5G11880    | 1                | 1                                | 1                            |
| AT5G12470    | 1                | 1                                | 1                            |
| AT5G13110    | 1                | 1                                | 0                            |
| AT5G13120    | 1                | 0                                | 0                            |
| AT5G13280    | 1                | 0                                | 0                            |
| AT5G13420    | 1                | 1                                | 1                            |
| AT5G13450    | 1                | 1                                | 1                            |

**Supplementary Tables pertaining to Figure 3**

**Supplementary Table S17. Root hair proteins identified in wild type, *caprice triptychon* (hairless), and *werewolf myb23* (excessively hairy) mutant sorted roots by GeLC-MS/MS proteomics**

| <b>Locus</b> | <b>wild type</b> | <b><i>caprice triptychon</i></b> | <b><i>werewolf myb23</i></b> |
|--------------|------------------|----------------------------------|------------------------------|
| AT5G13490    | 1                | 1                                | 1                            |
| AT5G13520    | 1                | 0                                | 0                            |
| AT5G13710    | 1                | 1                                | 1                            |
| AT5G13780    | 1                | 0                                | 0                            |
| AT5G13850    | 1                | 0                                | 0                            |
| AT5G14030    | 1                | 1                                | 1                            |
| AT5G14040    | 1                | 1                                | 1                            |
| AT5G14240    | 1                | 0                                | 0                            |
| AT5G14520    | 1                | 0                                | 1                            |
| AT5G14590    | 1                | 1                                | 0                            |
| AT5G14800    | 1                | 0                                | 1                            |
| AT5G15090    | 1                | 1                                | 1                            |
| AT5G15200    | 1                | 1                                | 1                            |
| AT5G15450    | 0                | 1                                | 0                            |
| AT5G15490    | 0                | 1                                | 0                            |
| AT5G15550    | 1                | 0                                | 1                            |
| AT5G15610    | 1                | 0                                | 0                            |
| AT5G15650    | 1                | 1                                | 1                            |
| AT5G15910    | 1                | 0                                | 0                            |
| AT5G16050    | 1                | 1                                | 0                            |
| AT5G16130    | 1                | 1                                | 1                            |
| AT5G17020    | 1                | 0                                | 0                            |
| AT5G17270    | 0                | 0                                | 1                            |
| AT5G17770    | 0                | 1                                | 1                            |
| AT5G17920    | 1                | 1                                | 1                            |
| AT5G18170    | 1                | 1                                | 1                            |
| AT5G18280    | 0                | 0                                | 1                            |
| AT5G18380    | 0                | 1                                | 0                            |
| AT5G19350    | 1                | 0                                | 0                            |
| AT5G19440    | 1                | 0                                | 1                            |
| AT5G19510    | 1                | 0                                | 1                            |
| AT5G19520    | 1                | 0                                | 0                            |
| AT5G19550    | 1                | 0                                | 1                            |
| AT5G19690    | 1                | 0                                | 1                            |
| AT5G19760    | 1                | 1                                | 1                            |
| AT5G19820    | 1                | 0                                | 0                            |
| AT5G20080    | 0                | 0                                | 1                            |
| AT5G20090    | 0                | 0                                | 1                            |
| AT5G20290    | 1                | 1                                | 1                            |
| AT5G20660    | 0                | 1                                | 0                            |
| AT5G20720    | 1                | 1                                | 1                            |
| AT5G20890    | 1                | 1                                | 1                            |
| AT5G20920    | 1                | 0                                | 0                            |
| AT5G20960    | 1                | 0                                | 0                            |
| AT5G22100    | 1                | 0                                | 0                            |
| AT5G22330    | 1                | 0                                | 0                            |
| AT5G22440    | 1                | 0                                | 1                            |
| AT5G22650    | 1                | 0                                | 1                            |

**Supplementary Tables pertaining to Figure 3**

**Supplementary Table S17. Root hair proteins identified in wild type, *caprice triptychon* (hairless), and *werewolf myb23* (excessively hairy) mutant sorted roots by GeLC-MS/MS proteomics**

| <b>Locus</b> | <b>wild type</b> | <b><i>caprice triptychon</i></b> | <b><i>werewolf myb23</i></b> |
|--------------|------------------|----------------------------------|------------------------------|
| AT5G22740    | 1                | 0                                | 1                            |
| AT5G22880    | 1                | 1                                | 1                            |
| AT5G23140    | 0                | 1                                | 0                            |
| AT5G23300    | 0                | 1                                | 1                            |
| AT5G23540    | 1                | 0                                | 1                            |
| AT5G23575    | 1                | 1                                | 0                            |
| AT5G23630    | 1                | 1                                | 0                            |
| AT5G23740    | 0                | 1                                | 0                            |
| AT5G23820    | 1                | 0                                | 0                            |
| AT5G23830    | 1                | 0                                | 0                            |
| AT5G23900    | 1                | 1                                | 1                            |
| AT5G24650    | 1                | 1                                | 1                            |
| AT5G25100    | 1                | 1                                | 1                            |
| AT5G25780    | 1                | 0                                | 0                            |
| AT5G26260    | 1                | 1                                | 1                            |
| AT5G26280    | 1                | 0                                | 0                            |
| AT5G26360    | 1                | 1                                | 1                            |
| AT5G26710    | 1                | 0                                | 1                            |
| AT5G26780    | 1                | 1                                | 1                            |
| AT5G26830    | 1                | 1                                | 1                            |
| AT5G26860    | 0                | 1                                | 0                            |
| AT5G27120    | 1                | 0                                | 1                            |
| AT5G27330    | 1                | 0                                | 0                            |
| AT5G27470    | 1                | 0                                | 1                            |
| AT5G27540    | 1                | 1                                | 1                            |
| AT5G27640    | 1                | 0                                | 1                            |
| AT5G27770    | 1                | 0                                | 1                            |
| AT5G27850    | 1                | 1                                | 1                            |
| AT5G28060    | 1                | 0                                | 1                            |
| AT5G28540    | 0                | 1                                | 1                            |
| AT5G28840    | 1                | 0                                | 0                            |
| AT5G34850    | 0                | 1                                | 0                            |
| AT5G35160    | 1                | 1                                | 1                            |
| AT5G35360    | 1                | 1                                | 1                            |
| AT5G35530    | 1                | 0                                | 1                            |
| AT5G35590    | 1                | 0                                | 1                            |
| AT5G35630    | 1                | 1                                | 1                            |
| AT5G35940    | 1                | 0                                | 1                            |
| AT5G36210    | 1                | 0                                | 0                            |
| AT5G36230    | 1                | 1                                | 1                            |
| AT5G37475    | 0                | 0                                | 1                            |
| AT5G37510    | 1                | 1                                | 1                            |
| AT5G37830    | 0                | 0                                | 1                            |
| AT5G38470    | 1                | 0                                | 0                            |
| AT5G38480    | 1                | 1                                | 1                            |
| AT5G38530    | 0                | 0                                | 1                            |
| AT5G39320    | 1                | 0                                | 1                            |
| AT5G39740    | 1                | 0                                | 0                            |

**Supplementary Tables pertaining to Figure 3**

**Supplementary Table S17. Root hair proteins identified in wild type, *caprice triptychon* (hairless), and *werewolf myb23* (excessively hairy) mutant sorted roots by GeLC-MS/MS proteomics**

| <b>Locus</b> | <b>wild type</b> | <b><i>caprice triptychon</i></b> | <b><i>werewolf myb23</i></b> |
|--------------|------------------|----------------------------------|------------------------------|
| AT5G39840    | 1                | 0                                | 0                            |
| AT5G40480    | 1                | 1                                | 1                            |
| AT5G40770    | 1                | 1                                | 1                            |
| AT5G40810    | 0                | 1                                | 1                            |
| AT5G40890    | 0                | 1                                | 0                            |
| AT5G41520    | 1                | 1                                | 1                            |
| AT5G41670    | 1                | 1                                | 1                            |
| AT5G41970    | 1                | 0                                | 1                            |
| AT5G42020    | 1                | 1                                | 0                            |
| AT5G42080    | 1                | 1                                | 1                            |
| AT5G42090    | 0                | 0                                | 1                            |
| AT5G42150    | 1                | 0                                | 0                            |
| AT5G42740    | 1                | 0                                | 0                            |
| AT5G42790    | 1                | 0                                | 1                            |
| AT5G42960    | 1                | 0                                | 1                            |
| AT5G42980    | 1                | 1                                | 1                            |
| AT5G43060    | 1                | 1                                | 0                            |
| AT5G43780    | 0                | 1                                | 0                            |
| AT5G43830    | 1                | 0                                | 1                            |
| AT5G43940    | 1                | 0                                | 1                            |
| AT5G43960    | 1                | 0                                | 0                            |
| AT5G43970    | 0                | 1                                | 1                            |
| AT5G45620    | 1                | 0                                | 0                            |
| AT5G45750    | 1                | 1                                | 0                            |
| AT5G46160    | 1                | 0                                | 0                            |
| AT5G46290    | 1                | 1                                | 1                            |
| AT5G46430    | 1                | 0                                | 1                            |
| AT5G47030    | 0                | 0                                | 1                            |
| AT5G47210    | 1                | 0                                | 0                            |
| AT5G47320    | 1                | 0                                | 0                            |
| AT5G47690    | 1                | 0                                | 0                            |
| AT5G47700    | 1                | 0                                | 1                            |
| AT5G47770    | 1                | 0                                | 1                            |
| AT5G47890    | 1                | 1                                | 1                            |
| AT5G47990    | 1                | 0                                | 1                            |
| AT5G48030    | 1                | 0                                | 0                            |
| AT5G48110    | 0                | 1                                | 0                            |
| AT5G48180    | 1                | 0                                | 0                            |
| AT5G48230    | 0                | 0                                | 1                            |
| AT5G48580    | 1                | 1                                | 1                            |
| AT5G48760    | 1                | 0                                | 0                            |
| AT5G48810    | 1                | 0                                | 1                            |
| AT5G49460    | 0                | 1                                | 0                            |
| AT5G49810    | 1                | 0                                | 0                            |
| AT5G49910    | 1                | 0                                | 1                            |
| AT5G50375    | 0                | 1                                | 1                            |
| AT5G50850    | 1                | 1                                | 1                            |
| AT5G50920    | 0                | 1                                | 0                            |



**Supplementary Tables pertaining to Figure 3**

**Supplementary Table S17. Root hair proteins identified in wild type, *caprice triptychon* (hairless), and *werewolf myb23* (excessively hairy) mutant sorted roots by GeLC-MS/MS proteomics**

| Locus     | wild type | <i>caprice triptychon</i> | <i>werewolf myb23</i> |
|-----------|-----------|---------------------------|-----------------------|
| AT5G52240 | 1         | 0                         | 1                     |
| AT5G52470 | 0         | 0                         | 1                     |
| AT5G52650 | 1         | 0                         | 0                     |
| AT5G52840 | 1         | 1                         | 1                     |
| AT5G52920 | 1         | 1                         | 1                     |
| AT5G53070 | 1         | 0                         | 0                     |
| AT5G53400 | 1         | 0                         | 1                     |
| AT5G53460 | 1         | 1                         | 1                     |
| AT5G53480 | 1         | 0                         | 0                     |
| AT5G53560 | 1         | 0                         | 1                     |
| AT5G54100 | 0         | 1                         | 0                     |
| AT5G54580 | 1         | 0                         | 1                     |
| AT5G54810 | 1         | 0                         | 1                     |
| AT5G55070 | 1         | 1                         | 1                     |
| AT5G55610 | 0         | 0                         | 1                     |
| AT5G55920 | 0         | 0                         | 1                     |
| AT5G55940 | 1         | 1                         | 1                     |
| AT5G56010 | 0         | 0                         | 1                     |
| AT5G56030 | 1         | 0                         | 0                     |
| AT5G56360 | 1         | 1                         | 0                     |
| AT5G56500 | 1         | 1                         | 1                     |
| AT5G56680 | 1         | 0                         | 1                     |
| AT5G56950 | 1         | 0                         | 0                     |
| AT5G57020 | 1         | 0                         | 0                     |
| AT5G57090 | 1         | 0                         | 0                     |
| AT5G57110 | 0         | 1                         | 0                     |
| AT5G57490 | 1         | 1                         | 1                     |
| AT5G57870 | 1         | 0                         | 1                     |
| AT5G58290 | 0         | 0                         | 1                     |
| AT5G59840 | 1         | 0                         | 0                     |
| AT5G59870 | 1         | 1                         | 1                     |
| AT5G59880 | 1         | 1                         | 1                     |
| AT5G60640 | 1         | 1                         | 1                     |
| AT5G60700 | 0         | 1                         | 0                     |
| AT5G60730 | 1         | 1                         | 0                     |
| AT5G60790 | 0         | 0                         | 1                     |
| AT5G60960 | 0         | 1                         | 1                     |
| AT5G60980 | 1         | 0                         | 1                     |
| AT5G61020 | 1         | 0                         | 0                     |
| AT5G61170 | 0         | 0                         | 1                     |
| AT5G61240 | 1         | 0                         | 0                     |
| AT5G61780 | 1         | 0                         | 1                     |
| AT5G61790 | 1         | 1                         | 1                     |
| AT5G61840 | 0         | 0                         | 1                     |
| AT5G62190 | 1         | 0                         | 1                     |
| AT5G62390 | 1         | 0                         | 1                     |
| AT5G62530 | 1         | 1                         | 1                     |
| AT5G63190 | 0         | 1                         | 0                     |

**Supplementary Tables pertaining to Figure 3**

**Supplementary Table S17. Root hair proteins identified in wild type, *caprice triptychon* (hairless), and *werewolf myb23* (excessively hairy) mutant sorted roots by GeLC-MS/MS proteomics**

| <b>Locus</b>               | <b>wild type</b> | <b><i>caprice triptychon</i></b> | <b><i>werewolf myb23</i></b> |
|----------------------------|------------------|----------------------------------|------------------------------|
| AT5G63400                  | 1                | 1                                | 1                            |
| AT5G63510                  | 0                | 1                                | 0                            |
| AT5G63570                  | 0                | 1                                | 0                            |
| AT5G63840                  | 1                | 1                                | 1                            |
| AT5G63890                  | 1                | 0                                | 0                            |
| AT5G63950                  | 1                | 0                                | 0                            |
| AT5G64290                  | 0                | 1                                | 0                            |
| AT5G64670                  | 1                | 0                                | 1                            |
| AT5G64860                  | 0                | 1                                | 0                            |
| AT5G65020                  | 1                | 1                                | 1                            |
| AT5G65430                  | 1                | 0                                | 0                            |
| AT5G65620                  | 1                | 1                                | 0                            |
| AT5G65720                  | 1                | 0                                | 1                            |
| AT5G65750                  | 0                | 1                                | 0                            |
| AT5G66140                  | 1                | 0                                | 1                            |
| AT5G66280                  | 0                | 1                                | 0                            |
| AT5G66510                  | 1                | 1                                | 1                            |
| AT5G66540                  | 1                | 0                                | 0                            |
| AT5G66680                  | 1                | 1                                | 1                            |
| AT5G66760                  | 1                | 1                                | 1                            |
| AT5G66860                  | 1                | 1                                | 1                            |
| AT5G67500                  | 1                | 1                                | 1                            |
| AT5G67590                  | 0                | 0                                | 1                            |
| AT5G67630                  | 1                | 0                                | 1                            |
| ATCG00120                  | 0                | 1                                | 0                            |
| ATCG00480                  | 0                | 0                                | 1                            |
| ATCG00490                  | 0                | 1                                | 1                            |
| ATCG00500                  | 1                | 1                                | 1                            |
| ATMG00070                  | 1                | 1                                | 1                            |
| ATMG00090                  | 1                | 0                                | 1                            |
| ATMG00510                  | 1                | 1                                | 1                            |
| ATMG00640                  | 1                | 1                                | 1                            |
| False Discovery Rate (FDR) | 0.011314186      |                                  |                              |
| REV_AT1G63770              | 0                | 0                                | 1                            |
| REV_AT1G65580              | 1                | 0                                | 0                            |
| REV_AT1G70150              | 1                | 0                                | 0                            |
| REV_AT1G74180              | 0                | 1                                | 0                            |
| REV_AT2G36200              | 1                | 0                                | 0                            |
| REV_AT2G45880              | 0                | 0                                | 1                            |
| REV_AT3G14670              | 0                | 0                                | 1                            |
| REV_AT3G49140              | 1                | 0                                | 0                            |
| REV_AT4G07400              | 0                | 1                                | 0                            |
| REV_AT4G13750              | 0                | 1                                | 0                            |
| REV_AT4G32340              | 1                | 0                                | 0                            |
| REV_AT5G48060              | 1                | 0                                | 0                            |
| REV_AT5G48690              | 1                | 0                                | 0                            |

### Supplementary Tables pertaining to Figure 3

#### Supplementary Table S18. Root hair proteins identified from genetics and FACS coupled with GeLC-MS/MS proteomics

| Locus     | Annotation                                                                                                                                                                                                                                                                                                                                            |
|-----------|-------------------------------------------------------------------------------------------------------------------------------------------------------------------------------------------------------------------------------------------------------------------------------------------------------------------------------------------------------|
| At1g14710 | hydroxyproline-rich glycoprotein family protein, contains proline-rich extensin domains, INTERPRO:IPR002965                                                                                                                                                                                                                                           |
| At1g70730 | phosphoglucomutase, cytoplasmic, putative / glucose phosphomutase, putative, strong similarity to SP:P93804 Phosphoglucomutase, cytoplasmic 1 (EC 5.4.2.2) (Glucose phosphomutase 1) (PGM 1) {Zea mays}; contains InterPro accession IPR006352: Phosphoglucosamine mutase                                                                             |
| At2g16570 | ATASE_ATASE1__amidophosphoribosyltransferase / glutamine phosphoribosylpyrophosphate amidotransferase / phosphoribosylidiphosphate 5-amidotransferase, identical to amidophosphoribosyltransferase (Arabidopsis thaliana) GI:469193; identical to cDNA amidophosphoribosyltransferase GI:469192                                                       |
| At3g10050 | OMR1__threonine ammonia-lyase / threonine dehydratase / threonine deaminase (OMR1), identical to SP:Q9ZSS6 Threonine dehydratase biosynthetic, chloroplast precursor (EC 4.3.1.19, formerly EC 4.2.1.16) (Threonine deaminase) (TD) {Arabidopsis thaliana}                                                                                            |
| At3g13460 | ECT2__Physically interacts with CIPK1.                                                                                                                                                                                                                                                                                                                |
| At3g15290 | 3-hydroxybutyryl-CoA dehydrogenase, putative, similar to S(+)-beta-hydroxybutyryl CoA dehydrogenase (3-hydroxybutyryl-CoA dehydrogenase) (Paracoccus denitrificans) GI:12003356; contains Pfam profiles PF02737: 3-hydroxyacyl-CoA dehydrogenase NAD binding, PF00725: 3-hydroxyacyl-CoA dehydrogenase C-terminal                                     |
| At4g20020 | expressed protein                                                                                                                                                                                                                                                                                                                                     |
| At5g22740 | ATCSLA02_ATCSLA2_CSLA02__glycosyl transferase family 2 protein, similar to beta-(1-3)-glucosyl transferase GB:AAC62210 GI:3687658 from (Bradyrhizobium japonicum), cellulose synthase from Agrobacterium tumeficiens (gi:710492) and Agrobacterium radiobacter (gi:710493); contains Pfam glycosyl transferase, group 2 family protein domain PF00535 |
| At5g43830 | expressed protein, similar to auxin down-regulated protein ARG10 (Vigna radiata) GI:2970051, wali7 (aluminum-induced protein) (Triticum aestivum) GI:451193                                                                                                                                                                                           |
| At5g64670 | ribosomal protein L15 family protein                                                                                                                                                                                                                                                                                                                  |

**Supplementary Tables pertaining to Figure 3**

**Supplementary Table S19. Loci enriched in individual cell types from microarray data**

**Loci enriched in Root Hairs (COBL9) from micorarray expression data analysis (1.7 fold, p <0.05)**

| Affymetrix Probeset | Locus     | Mean Microarray Expression Values |                          |                 |                             |                   |                    |
|---------------------|-----------|-----------------------------------|--------------------------|-----------------|-----------------------------|-------------------|--------------------|
|                     |           | Root Hairs (COBL9)                | Non-Hair Epidermis (WER) | Cortex (CORTEX) | Endodermis/ Quiescent (SCR) | Vasculature (WOL) | Columella (PET111) |
| 261581_at           | AT1G01140 | 4.523198137                       | 0.921060878              | 2.102934559     | 1.512124821                 | 0.716350311       | 0.518938259        |
| 261057_at           | AT1G01230 | 7.642145638                       | 3.582403552              | 4.261009088     | 3.725502701                 | 2.826259271       | 2.841741814        |
| 257484_at           | AT1G01650 | 8.075087324                       | 2.681742444              | 4.345283761     | 2.811676839                 | 2.153745672       | 3.651670162        |
| 261562_at           | AT1G01750 | 21.71934544                       | 4.717357029              | 0.867972646     | 0.849712383                 | 2.150325942       | 1.061526633        |
| 259443_at           | AT1G02360 | 8.763601172                       | 1.698078489              | 1.073647106     | 1.262533552                 | 1.486714399       | 2.601658573        |
| 264835_at           | AT1G03550 | 10.60646127                       | 2.684188637              | 0.837420852     | 0.897577396                 | 0.875632315       | 1.180160538        |
| 264330_at           | AT1G04120 | 6.674759867                       | 3.625071286              | 2.053235701     | 3.04895585                  | 2.255802517       | 2.005990956        |
| 264324_at           | AT1G04160 | 2.422892188                       | 1.048737159              | 0.636322216     | 0.672641112                 | 0.853698993       | 1.195368632        |
| 264574_at           | AT1G05300 | 3.234333737                       | 0.98167281               | 1.436248971     | 0.636333502                 | 0.705685089       | 0.971694654        |
| 264572_at           | AT1G05320 | 11.88069952                       | 3.041907459              | 1.072649657     | 0.936245459                 | 1.249523272       | 1.156886022        |
| 261252_at           | AT1G05810 | 4.185002909                       | 2.005477797              | 0.688363793     | 1.129779365                 | 1.256274897       | 1.112392949        |
| 261414_at           | AT1G07795 | 8.073638792                       | 1.919204115              | 0.928627631     | 0.956823761                 | 1.251472485       | 1.202810045        |
| 260648_at           | AT1G08050 | 2.93120968                        | 0.554602099              | 0.646869879     | 1.175563287                 | 0.926563255       | 0.764325433        |
| 264645_at           | AT1G08940 | 8.261826034                       | 1.106971055              | 4.272156922     | 1.293000259                 | 0.865759436       | 0.89347825         |
| 264643_at           | AT1G08990 | 2.346536772                       | 1.221654828              | 0.767997927     | 0.588499317                 | 0.807274145       | 0.509149109        |
| 264253_at           | AT1G09170 | 1.587458817                       | 0.620717837              | 0.478816296     | 0.544223228                 | 0.748781096       | 0.556935349        |
| 264522_at           | AT1G10050 | 2.873343793                       | 1.602482757              | 1.257099245     | 1.39299609                  | 1.0919781         | 1.248930075        |
| 262786_at           | AT1G10740 | 3.923625101                       | 2.2264639                | 1.701298617     | 2.301967713                 | 1.428330265       | 1.485758024        |
| 261846_at           | AT1G11540 | 4.640862618                       | 2.568890923              | 1.043460925     | 1.196267876                 | 1.045892358       | 1.049400751        |
| 262814_at           | AT1G11660 | 5.554977986                       | 2.395749477              | 2.34392394      | 2.360729112                 | 2.329429642       | 1.85773597         |
| 260992_at           | AT1G12150 | 0.941788607                       | 0.431818132              | 0.344843416     | 0.40546212                  | 0.493790417       | 0.360411918        |
| 245566_at           | AT1G12220 | 1.925765715                       | 0.829683653              | 0.627251382     | 0.514499813                 | 0.645780779       | 0.515622132        |
| 259525_at           | AT1G12560 | 16.86527144                       | 3.184538495              | 0.831941685     | 1.001270966                 | 2.035134687       | 0.943289668        |
| 261199_at           | AT1G12950 | 10.93995168                       | 1.479249876              | 1.594859219     | 0.895934683                 | 1.172788459       | 0.716806343        |
| 262793_at           | AT1G13110 | 2.205292518                       | 0.686407079              | 1.274903207     | 0.5933237                   | 0.558500331       | 0.460566375        |
| 262660_at           | AT1G14000 | 8.755942666                       | 4.233761383              | 3.887846112     | 2.43177428                  | 2.637859158       | 2.96001826         |
| 261475_at           | AT1G14550 | 3.611141777                       | 0.604873759              | 0.783887176     | 1.755510123                 | 0.642520171       | 0.87821374         |
| 262587_at           | AT1G15490 | 2.332331853                       | 1.156833478              | 1.216073051     | 0.64760379                  | 0.955672527       | 1.114452805        |
| 261766_at           | AT1G15580 | 2.493125724                       | 0.628198959              | 0.655352553     | 0.580138071                 | 0.673190072       | 0.641825104        |
| 259486_at           | AT1G15710 | 3.349547712                       | 1.955732468              | 1.446796127     | 1.159425507                 | 1.409721486       | 1.417230051        |
| 256075_at           | AT1G18150 | 10.54486785                       | 4.200111386              | 2.250938795     | 2.189797838                 | 1.818813427       | 1.428776336        |

**Supplementary Tables pertaining to Figure 3**

**Supplementary Table S19. Loci enriched in individual cell types from microarray data**

**Loci enriched in Root Hairs (COBL9) from micorarray expression data analysis (1.7 fold, p <0.05)**

| Affymetrix Probeset | Locus     | Mean Microarray Expression Values |                          |                 |                             |                   |                    |
|---------------------|-----------|-----------------------------------|--------------------------|-----------------|-----------------------------|-------------------|--------------------|
|                     |           | Root Hairs (COBL9)                | Non-Hair Epidermis (WER) | Cortex (CORTEX) | Endodermis/ Quiescent (SCR) | Vasculature (WOL) | Columella (PET111) |
| 261677_at           | AT1G18470 | 6.04997177                        | 1.870925708              | 2.573182806     | 2.791439743                 | 2.275061255       | 3.137060838        |
| 255774_at           | AT1G18620 | 4.88980055                        | 1.560440521              | 2.01910027      | 2.494938414                 | 0.949071405       | 0.867160047        |
| 261429_at           | AT1G18860 | 2.805640772                       | 0.524613741              | 0.489994363     | 0.437861069                 | 0.467106288       | 0.494965672        |
| 259462_at           | AT1G18940 | 1.766510716                       | 0.689764089              | 0.91383229      | 0.720577087                 | 0.824918378       | 0.678663729        |
| 259481_at           | AT1G18970 | 1.645335019                       | 0.53695648               | 0.658246702     | 0.757687926                 | 0.663609789       | 0.698792351        |
| 256010_at           | AT1G19220 | 2.047240808                       | 1.158871114              | 0.9081759       | 0.681580057                 | 0.973525863       | 0.8022014          |
| 256011_at           | AT1G19230 | 2.582668751                       | 0.839188531              | 0.774521957     | 0.868189078                 | 0.657519844       | 0.919320373        |
| 262801_at           | AT1G21010 | 3.841892423                       | 1.168172069              | 1.454733293     | 1.114448945                 | 0.808336394       | 1.401784281        |
| 260899_at           | AT1G21370 | 11.02950709                       | 4.090569886              | 5.777314045     | 3.107166852                 | 2.879492743       | 4.645647995        |
| 260856_at           | AT1G21910 | 7.654191804                       | 3.049880556              | 3.31301967      | 2.037812816                 | 2.072948751       | 1.375162941        |
| 261927_at           | AT1G22500 | 5.109480502                       | 1.56045996               | 1.410037709     | 0.718912162                 | 0.904955193       | 0.626920643        |
| 261937_at           | AT1G22570 | 4.614647029                       | 1.378315098              | 1.068587067     | 0.739548464                 | 0.886990278       | 0.981368065        |
| 264211_at           | AT1G22770 | 3.906281925                       | 1.985321398              | 2.125952566     | 1.916513316                 | 0.985872048       | 2.273347766        |
| 265175_at           | AT1G23480 | 6.803569032                       | 2.939685895              | 1.089197084     | 0.999594476                 | 1.012455871       | 0.739792813        |
| 265132_at           | AT1G23830 | 2.325846614                       | 1.21483678               | 1.365566179     | 0.802828036                 | 0.882767429       | 0.886853192        |
| 264861_at           | AT1G24320 | 2.950823879                       | 1.082382235              | 0.640967774     | 0.592156957                 | 0.550320301       | 0.620160171        |
| 265013_at           | AT1G24460 | 3.820953943                       | 1.821606247              | 2.179848915     | 1.752218523                 | 1.522843838       | 1.894173338        |
| 245650_at           | AT1G24735 | 2.789080931                       | 0.791475131              | 0.622125797     | 0.723837759                 | 0.786560198       | 0.71152196         |
| 245821_at           | AT1G26270 | 9.590203761                       | 4.694388683              | 3.644439194     | 3.217100426                 | 2.556258571       | 2.397041114        |
| 264988_at           | AT1G27140 | 15.2594547                        | 5.639903234              | 1.084267893     | 0.842621195                 | 1.212446884       | 1.167994856        |
| 264447_at           | AT1G27300 | 6.674754571                       | 2.816972296              | 1.881367638     | 1.636341763                 | 1.263527379       | 1.078500455        |
| 261647_at           | AT1G27740 | 10.66682868                       | 1.832108125              | 0.638323516     | 0.718053555                 | 1.00185892        | 0.695227118        |
| 262743_at           | AT1G29020 | 2.356663634                       | 0.834397174              | 1.366947012     | 0.784103924                 | 0.808802294       | 0.782188697        |
| 260882_at           | AT1G29280 | 19.11609029                       | 7.088161905              | 3.043711409     | 2.571514808                 | 1.542429143       | 2.492010752        |
| 259789_at           | AT1G29395 | 3.036579313                       | 0.613684782              | 0.575543269     | 0.532091057                 | 0.623003408       | 0.623002995        |
| 263228_at           | AT1G30700 | 7.05326377                        | 1.09485241               | 3.008535351     | 2.498410563                 | 1.151056504       | 0.834466489        |
| 257418_at           | AT1G30850 | 4.789274591                       | 1.169383798              | 0.699818679     | 0.798143068                 | 1.097478534       | 0.903930574        |
| 265102_at           | AT1G30870 | 29.26649439                       | 6.119595789              | 1.215674212     | 2.232677527                 | 4.666007882       | 1.479413597        |
| 265161_at           | AT1G30900 | 17.33903534                       | 3.622714968              | 2.047849734     | 7.415677758                 | 3.708726614       | 7.041172268        |
| 265155_at           | AT1G30990 | 5.301927134                       | 0.788957877              | 0.521143528     | 0.615334659                 | 0.732453801       | 0.798050271        |
| 261216_at           | AT1G33030 | 1.244769645                       | 0.586498105              | 0.531680735     | 0.575158231                 | 0.566355688       | 0.654534991        |

**Supplementary Tables pertaining to Figure 3**

**Supplementary Table S19. Loci enriched in individual cell types from microarray data**

**Loci enriched in Root Hairs (COBL9) from micorarray expression data analysis (1.7 fold, p <0.05)**

| Affymetrix Probeset | Locus     | Mean Microarray Expression Values |                          |                 |                             |                   |                    |
|---------------------|-----------|-----------------------------------|--------------------------|-----------------|-----------------------------|-------------------|--------------------|
|                     |           | Root Hairs (COBL9)                | Non-Hair Epidermis (WER) | Cortex (CORTEX) | Endodermis/ Quiescent (SCR) | Vasculature (WOL) | Columella (PET111) |
| 245767_at           | AT1G33610 | 2.103880806                       | 0.903803183              | 0.592650388     | 0.537211332                 | 0.557169005       | 0.54428094         |
| 261999_at           | AT1G33800 | 22.69838501                       | 11.09446676              | 4.679716794     | 3.135452477                 | 4.101656774       | 5.603385021        |
| 262038_at           | AT1G35580 | 22.44323199                       | 7.121703443              | 12.08765646     | 8.333368005                 | 6.242052612       | 8.817129578        |
| 262026_at           | AT1G35670 | 10.8551322                        | 3.22291406               | 3.224914026     | 2.380316789                 | 2.79167771        | 2.690099604        |
| 259454_at           | AT1G44050 | 1.30119117                        | 0.499818474              | 0.515953722     | 0.446076884                 | 0.529245304       | 0.486012663        |
| 259453_at           | AT1G44090 | 1.26293059                        | 0.491191479              | 0.641581837     | 0.609338109                 | 0.737755376       | 0.616656795        |
| 245798_at           | AT1G45545 | 0.910526386                       | 0.395436825              | 0.372380292     | 0.435279377                 | 0.529899423       | 0.470884732        |
| 256141_at           | AT1G48640 | 7.286527966                       | 0.806594335              | 0.653526405     | 0.704950116                 | 0.862998415       | 0.78764206         |
| 260758_at           | AT1G48930 | 17.62360653                       | 2.776921079              | 0.681641555     | 0.829626745                 | 2.375412941       | 0.843420016        |
| 260752_at           | AT1G49030 | 1.659206629                       | 0.830082827              | 0.607135096     | 0.663795235                 | 0.656204203       | 0.707508335        |
| 261690_at           | AT1G50090 | 0.965908628                       | 0.55327869               | 0.478801972     | 0.536576575                 | 0.552324104       | 0.518712636        |
| 256205_at           | AT1G50890 | 4.085457378                       | 1.627919417              | 1.151463338     | 0.878781164                 | 1.110024537       | 1.019025606        |
| 260517_at           | AT1G51420 | 12.37705999                       | 3.225214041              | 2.263287878     | 0.840446738                 | 1.060974661       | 0.784612108        |
| 256170_at           | AT1G51790 | 2.557004544                       | 0.825833731              | 0.825367517     | 0.829259278                 | 0.914645361       | 0.885202764        |
| 256169_at           | AT1G51800 | 6.607327357                       | 1.208160933              | 0.923368294     | 0.72966113                  | 0.834377542       | 0.617522053        |
| 246375_at           | AT1G51830 | 1.550133568                       | 0.408331986              | 0.57744788      | 0.468159036                 | 0.652246245       | 0.452628165        |
| 246366_at           | AT1G51850 | 6.183257407                       | 1.693643109              | 0.505632386     | 0.512157824                 | 0.797068858       | 0.456623913        |
| 246373_at           | AT1G51860 | 1.423957003                       | 0.528848493              | 0.482846017     | 0.533799747                 | 0.787927548       | 0.505872605        |
| 259836_at           | AT1G52240 | 1.576777004                       | 0.772351865              | 0.412058996     | 0.489450089                 | 0.5349382         | 0.453289411        |
| 259637_at           | AT1G52260 | 2.648487687                       | 1.366185985              | 0.982567269     | 1.066372346                 | 1.273339472       | 1.080341454        |
| 262138_at           | AT1G52660 | 3.17186746                        | 0.956903108              | 0.599555596     | 0.631722057                 | 0.917749244       | 0.705602851        |
| 260646_at           | AT1G53340 | 2.46062103                        | 1.313384582              | 0.864313514     | 0.573113386                 | 0.742737809       | 0.589544154        |
| 260614_at           | AT1G53390 | 4.520149773                       | 1.775192054              | 1.946557529     | 1.443231026                 | 1.461621999       | 2.180647423        |
| 259963_at           | AT1G53660 | 3.362714638                       | 1.552555983              | 0.80594744      | 0.66161158                  | 1.023906787       | 1.838508876        |
| 262254_at           | AT1G53920 | 13.53464773                       | 4.245135836              | 1.212248943     | 0.885928902                 | 1.488923182       | 4.990646832        |
| 263003_at           | AT1G54450 | 2.560347961                       | 0.89357589               | 0.801229473     | 0.476515793                 | 0.539459354       | 1.042798705        |
| 264192_at           | AT1G54710 | 7.407644825                       | 2.150285301              | 3.537647117     | 3.024592796                 | 2.68898116        | 3.436769133        |
| 256349_at           | AT1G54890 | 12.47812227                       | 5.501607765              | 1.064277711     | 0.544474789                 | 0.779046435       | 1.97788935         |
| 256352_at           | AT1G54970 | 13.21852584                       | 3.150213255              | 0.823250819     | 1.18968947                  | 3.606409142       | 1.209866865        |
| 265124_at           | AT1G55430 | 3.270084548                       | 1.68362343               | 0.619067984     | 0.577715261                 | 0.701789646       | 0.54722808         |
| 246400_at           | AT1G57540 | 5.732682682                       | 3.070169199              | 2.899961152     | 2.773282794                 | 3.299269967       | 2.342611497        |

**Supplementary Tables pertaining to Figure 3**

**Supplementary Table S19. Loci enriched in individual cell types from microarray data**

**Loci enriched in Root Hairs (COBL9) from micorarray expression data analysis (1.7 fold, p <0.05)**

| Affymetrix Probeset | Locus     | Mean Microarray Expression Values |                          |                 |                             |                   |                    |
|---------------------|-----------|-----------------------------------|--------------------------|-----------------|-----------------------------|-------------------|--------------------|
|                     |           | Root Hairs (COBL9)                | Non-Hair Epidermis (WER) | Cortex (CORTEX) | Endodermis/ Quiescent (SCR) | Vasculature (WOL) | Columella (PET111) |
| 246404_at           | AT1G57600 | 4.544504168                       | 2.344123541              | 2.6362936       | 1.612855245                 | 2.086679456       | 1.949346744        |
| 264929_at           | AT1G60730 | 1.82165691                        | 0.977710827              | 0.82566743      | 0.683141593                 | 0.581618879       | 0.479585575        |
| 259724_at           | AT1G60940 | 5.595907697                       | 1.665902391              | 2.93821295      | 1.524144662                 | 1.43151765        | 1.68838871         |
| 264757_at           | AT1G61360 | 7.213609515                       | 1.2128099                | 2.94247746      | 2.105354484                 | 1.249997255       | 1.854088028        |
| 264283_at           | AT1G61850 | 3.311710626                       | 1.561103064              | 1.798530776     | 1.483573589                 | 1.280606274       | 1.602585287        |
| 262641_at           | AT1G62730 | 2.504203579                       | 1.400996357              | 1.035569994     | 0.883670474                 | 1.146095388       | 0.994338229        |
| 261099_at           | AT1G62980 | 7.05326769                        | 2.237412482              | 0.613998738     | 0.857909596                 | 2.277379134       | 0.916859575        |
| 261107_at           | AT1G63010 | 16.8613648                        | 6.561839477              | 5.258248146     | 3.400931881                 | 1.787287793       | 4.22549327         |
| 261550_at           | AT1G63450 | 9.996851076                       | 2.072149195              | 0.61475174      | 0.677585192                 | 1.108367087       | 0.904885377        |
| 260320_at           | AT1G63930 | 3.81911717                        | 1.044131361              | 0.616450215     | 0.683619563                 | 0.958375505       | 0.750529074        |
| 262877_at           | AT1G64850 | 18.55240737                       | 6.353278621              | 5.886428766     | 3.815938379                 | 4.610129429       | 7.413434428        |
| 263109_at           | AT1G65180 | 2.669900459                       | 1.226925701              | 0.729012441     | 1.311893882                 | 1.056926948       | 0.796703341        |
| 264683_at           | AT1G65580 | 5.795168362                       | 2.34038748               | 2.898432763     | 3.271035526                 | 2.658239148       | 3.201060641        |
| 264685_at           | AT1G65610 | 17.6260883                        | 3.561258413              | 1.192173795     | 0.938866627                 | 1.360219124       | 0.951694308        |
| 256360_at           | AT1G66440 | 2.313820086                       | 0.703281499              | 0.658217511     | 0.557667603                 | 0.604479727       | 0.622376564        |
| 256362_at           | AT1G66450 | 2.504072166                       | 0.80104515               | 1.034856028     | 0.574416954                 | 0.633799689       | 1.151099022        |
| 256358_at           | AT1G66470 | 4.562613894                       | 2.647737962              | 0.60388737      | 0.492552741                 | 0.658728019       | 0.674309003        |
| 256380_at           | AT1G66680 | 11.29846768                       | 5.566999939              | 6.520246536     | 6.225837957                 | 6.097120997       | 5.01309657         |
| 264229_at           | AT1G67480 | 12.12271411                       | 4.460237201              | 6.910883726     | 3.348165715                 | 2.961034463       | 1.861327483        |
| 260190_at           | AT1G67560 | 6.196143793                       | 1.65371253               | 1.220551797     | 0.881773114                 | 1.220801241       | 2.244829358        |
| 260002_at           | AT1G67940 | 4.106531217                       | 1.912107567              | 2.06461574      | 0.893895607                 | 0.945444604       | 1.787837526        |
| 260003_at           | AT1G68100 | 7.002823001                       | 3.235091719              | 3.973316996     | 1.772954454                 | 1.741943414       | 2.748678385        |
| 260432_at           | AT1G68150 | 5.313228321                       | 3.062617971              | 0.750964175     | 0.526867187                 | 0.67910526        | 1.305091784        |
| 260042_at           | AT1G68820 | 1.966829957                       | 0.959215662              | 0.973555889     | 0.813539171                 | 0.847448046       | 0.993376165        |
| 260344_at           | AT1G69240 | 8.144929464                       | 1.282624473              | 0.649279793     | 0.678106262                 | 0.921664674       | 0.806011024        |
| 256299_at           | AT1G69530 | 6.731855978                       | 1.630071435              | 1.560333862     | 0.590190374                 | 0.709612594       | 1.852810116        |
| 260403_at           | AT1G69810 | 8.398319536                       | 3.608032477              | 2.347738028     | 1.134340299                 | 1.03272547        | 2.37191108         |
| 260366_at           | AT1G70460 | 5.950723824                       | 1.294135878              | 0.612226563     | 0.710559363                 | 1.061261742       | 0.729645828        |
| 259947_at           | AT1G71530 | 2.898502948                       | 0.979726631              | 0.444790402     | 0.523881314                 | 0.573358054       | 0.612087776        |
| 260174_at           | AT1G71940 | 7.956934491                       | 3.236764331              | 3.928830357     | 2.237957648                 | 3.168395962       | 3.300353791        |
| 256334_at           | AT1G72120 | 3.410757818                       | 1.665479721              | 0.629359501     | 0.574142692                 | 0.717416425       | 0.694217313        |

**Supplementary Tables pertaining to Figure 3**

**Supplementary Table S19. Loci enriched in individual cell types from microarray data**

**Loci enriched in Root Hairs (COBL9) from micorarray expression data analysis (1.7 fold, p <0.05)**

| Affymetrix Probeset | Locus     | Mean Microarray Expression Values |                          |                 |                             |                   |                    |
|---------------------|-----------|-----------------------------------|--------------------------|-----------------|-----------------------------|-------------------|--------------------|
|                     |           | Root Hairs (COBL9)                | Non-Hair Epidermis (WER) | Cortex (CORTEX) | Endodermis/ Quiescent (SCR) | Vasculature (WOL) | Columella (PET111) |
| 259846_at           | AT1G72140 | 3.730028421                       | 1.480287789              | 0.83072068      | 0.706374864                 | 0.843723987       | 0.879233784        |
| 259853_at           | AT1G72300 | 3.195406039                       | 0.911855014              | 1.196371677     | 1.076389351                 | 1.071520368       | 0.914361527        |
| 262364_at           | AT1G72860 | 1.924570651                       | 0.800816008              | 0.647741886     | 0.613561303                 | 0.73654076        | 0.779518108        |
| 262365_at           | AT1G72870 | 1.678117113                       | 0.858512926              | 0.630378376     | 0.622873324                 | 0.685891517       | 0.757937009        |
| 260093_at           | AT1G73270 | 0.838254462                       | 0.462922014              | 0.319435717     | 0.324444083                 | 0.377132934       | 0.351622239        |
| 260381_at           | AT1G73860 | 1.331470918                       | 0.568133016              | 0.450936876     | 0.473699504                 | 0.58656667        | 0.541203258        |
| 260335_at           | AT1G74000 | 2.521040845                       | 0.688475428              | 0.532618335     | 0.596650561                 | 0.635481297       | 0.925915673        |
| 260254_at           | AT1G74210 | 21.56085509                       | 9.169931507              | 6.582511232     | 2.680723575                 | 2.667213305       | 5.846931282        |
| 260225_at           | AT1G74590 | 2.041144254                       | 0.516857788              | 0.968829393     | 0.54556533                  | 0.535825009       | 0.498976566        |
| 262223_at           | AT1G74680 | 2.293048929                       | 1.129717534              | 1.295863548     | 1.035770569                 | 1.12501792        | 0.980565263        |
| 262216_at           | AT1G74780 | 3.62915591                        | 1.529300046              | 1.755722895     | 1.422089054                 | 1.494379877       | 1.408627463        |
| 256509_at           | AT1G75300 | 1.529629353                       | 0.508567214              | 0.614819273     | 0.604118616                 | 0.725981103       | 0.839615581        |
| 261771_at           | AT1G76150 | 6.902516412                       | 2.602831855              | 3.226871881     | 2.15247567                  | 1.940674976       | 3.482747586        |
| 264960_at           | AT1G76930 | 1.396381903                       | 0.446103137              | 0.666455625     | 0.49971681                  | 0.563508863       | 0.59557335         |
| 264479_at           | AT1G77280 | 1.969149634                       | 0.766564706              | 0.511213096     | 0.509917102                 | 0.576067135       | 0.84656934         |
| 262188_at           | AT1G77810 | 3.618290336                       | 1.289205695              | 1.411087005     | 1.00947306                  | 1.127364743       | 1.135495087        |
| 262133_at           | AT1G78000 | 12.22809968                       | 5.226817473              | 2.928819617     | 1.331831612                 | 1.501867072       | 2.03287529         |
| 264144_at           | AT1G79320 | 2.194425296                       | 0.573086409              | 0.436362742     | 0.513115337                 | 0.550412249       | 0.468927963        |
| 262942_at           | AT1G79450 | 4.667520293                       | 1.557731657              | 1.157174831     | 0.570532566                 | 0.661606924       | 0.944723718        |
| 262945_at           | AT1G79510 | 1.202811726                       | 0.595541095              | 0.675905566     | 0.622894774                 | 0.656845632       | 0.6192931          |
| 260161_at           | AT1G79860 | 1.40819037                        | 0.584621749              | 0.400135763     | 0.459303576                 | 0.627456923       | 0.484045517        |
| 261894_at           | AT1G80900 | 2.444690463                       | 1.100557211              | 0.872693006     | 0.997140285                 | 0.883551062       | 1.212839709        |
| 266342_at           | AT2G01540 | 14.2256413                        | 5.149693103              | 2.023035869     | 1.556043494                 | 1.348464951       | 1.104792546        |
| 265868_at           | AT2G01650 | 5.82235378                        | 2.176844735              | 2.617708827     | 2.195175539                 | 1.94954902        | 1.932329878        |
| 263594_at           | AT2G01880 | 15.12509605                       | 2.927664568              | 2.00827509      | 1.234424452                 | 1.377285614       | 1.012306391        |
| 267216_at           | AT2G02620 | 2.189389487                       | 1.249470446              | 0.935731992     | 0.603118346                 | 0.68705339        | 0.601714703        |
| 267215_at           | AT2G02630 | 2.481371946                       | 1.37552337               | 0.902271321     | 0.545481732                 | 0.74699202        | 0.692923207        |
| 266743_at           | AT2G02990 | 9.280031503                       | 0.518327113              | 0.74079414      | 0.611527663                 | 0.637199359       | 0.679095426        |
| 266721_at           | AT2G03220 | 6.083056753                       | 2.244310025              | 2.667541062     | 1.588627512                 | 1.957395531       | 2.044845448        |
| 265718_at           | AT2G03340 | 1.44725725                        | 0.823730576              | 0.6009252       | 0.570505048                 | 0.62726556        | 0.761062998        |
| 263616_at           | AT2G04680 | 4.443991236                       | 1.628749227              | 0.888522717     | 0.810110439                 | 1.072065033       | 0.562272314        |



**Supplementary Tables pertaining to Figure 3**

**Supplementary Table S19. Loci enriched in individual cell types from microarray data**

**Loci enriched in Root Hairs (COBL9) from micorarray expression data analysis (1.7 fold, p <0.05)**

| Affymetrix Probeset | Locus     | Mean Microarray Expression Values |                          |                 |                             |                   |                    |
|---------------------|-----------|-----------------------------------|--------------------------|-----------------|-----------------------------|-------------------|--------------------|
|                     |           | Root Hairs (COBL9)                | Non-Hair Epidermis (WER) | Cortex (CORTEX) | Endodermis/ Quiescent (SCR) | Vasculature (WOL) | Columella (PET111) |
| 263565_at           | AT2G15390 | 3.793711249                       | 1.854523242              | 1.722786581     | 0.750288885                 | 0.842964194       | 0.682665858        |
| 266522_at           | AT2G16920 | 2.432145758                       | 1.389631147              | 1.426763991     | 1.255549986                 | 1.317773144       | 1.157834823        |
| 263583_at           | AT2G17130 | 13.86631575                       | 6.186794581              | 4.521354426     | 2.494431407                 | 2.258890425       | 3.210084172        |
| 263070_at           | AT2G17600 | 1.108954504                       | 0.570314528              | 0.580527386     | 0.513163959                 | 0.596625776       | 0.510894386        |
| 264592_at           | AT2G17720 | 34.43488967                       | 15.58390513              | 14.98286387     | 10.11208254                 | 6.226802379       | 2.793568408        |
| 265329_at           | AT2G18450 | 7.02003931                        | 0.843409966              | 0.55200881      | 0.498218987                 | 0.555632182       | 0.502526482        |
| 267439_at           | AT2G19060 | 2.288053565                       | 0.958446554              | 0.551840433     | 0.723507143                 | 1.034236486       | 0.620912318        |
| 267280_at           | AT2G19450 | 4.861079389                       | 1.613031106              | 2.431515826     | 2.071591502                 | 2.10803091        | 2.769176186        |
| 266693_at           | AT2G19800 | 7.474315734                       | 1.13283674               | 2.606657371     | 0.926778532                 | 1.347862772       | 1.238485636        |
| 263754_at           | AT2G21510 | 2.412271507                       | 0.633548539              | 0.665580093     | 0.751994353                 | 0.638113556       | 0.703961414        |
| 263749_at           | AT2G21520 | 6.934102236                       | 3.969235582              | 3.166299325     | 3.480837115                 | 2.262941535       | 3.045773625        |
| 257432_at           | AT2G21850 | 5.222349848                       | 1.96354074               | 1.903548134     | 1.050393621                 | 0.996165154       | 1.671806065        |
| 264053_at           | AT2G22560 | 5.431429184                       | 2.738807661              | 0.826239792     | 0.718632822                 | 1.377542431       | 1.614975411        |
| 265289_at           | AT2G22690 | 2.733673076                       | 1.461533875              | 1.467923117     | 1.473284797                 | 1.206183624       | 1.497629039        |
| 266826_at           | AT2G22910 | 2.37904372                        | 0.842299191              | 0.906617894     | 1.008370767                 | 0.939037655       | 0.775256912        |
| 267261_at           | AT2G23120 | 34.09627979                       | 9.555101728              | 19.01731947     | 19.68290804                 | 7.670417961       | 15.75079033        |
| 266561_at           | AT2G23960 | 2.854662239                       | 1.04239827               | 0.488240257     | 0.501267672                 | 0.628559689       | 0.769766895        |
| 265691_at           | AT2G24330 | 2.795210932                       | 1.618822231              | 0.878082008     | 1.355207557                 | 1.065593984       | 1.590939571        |
| 265666_at           | AT2G27440 | 1.345441333                       | 0.596760372              | 0.549789716     | 0.534007241                 | 0.674302273       | 0.783358031        |
| 265636_at           | AT2G27480 | 1.63271099                        | 0.72920686               | 0.818170651     | 0.742601617                 | 0.643259393       | 0.736401277        |
| 266247_at           | AT2G27660 | 5.628221793                       | 1.126020347              | 0.823551208     | 1.209767396                 | 1.03348562        | 0.670896686        |
| 265275_at           | AT2G28440 | 2.919964136                       | 1.065947927              | 0.632544844     | 0.624769936                 | 0.849658649       | 0.765466115        |
| 263436_at           | AT2G28690 | 1.519367355                       | 0.592598413              | 0.621720747     | 0.611733624                 | 0.704856307       | 0.817364317        |
| 266784_at           | AT2G28960 | 0.974205354                       | 0.487260785              | 0.407668307     | 0.448180863                 | 0.507808289       | 0.469863343        |
| 266670_at           | AT2G29740 | 4.194084073                       | 1.409788093              | 0.985223231     | 0.73629612                  | 0.887402071       | 0.651177208        |
| 263484_at           | AT2G29900 | 5.300162112                       | 1.888952485              | 2.894842444     | 2.243066111                 | 2.671217903       | 2.481152581        |
| 266336_at           | AT2G32270 | 15.67809199                       | 4.084997594              | 4.795697327     | 1.018960873                 | 2.128945301       | 1.03030814         |
| 267045_at           | AT2G34180 | 2.365868314                       | 0.524977865              | 0.537303248     | 0.58885634                  | 0.835678662       | 1.272465694        |
| 267427_at           | AT2G34830 | 4.518704016                       | 2.085866136              | 0.650143189     | 0.619472338                 | 0.790268141       | 1.982459202        |
| 267428_at           | AT2G34840 | 3.957730687                       | 1.903317682              | 1.830928048     | 0.914430678                 | 1.227943998       | 1.280304267        |
| 267409_at           | AT2G34910 | 19.7184044                        | 4.782341293              | 1.036783389     | 0.956244637                 | 1.455196576       | 0.858390446        |

**Supplementary Tables pertaining to Figure 3**

**Supplementary Table S19. Loci enriched in individual cell types from microarray data**

**Loci enriched in Root Hairs (COBL9) from micorarray expression data analysis (1.7 fold, p <0.05)**

| Affymetrix Probeset | Locus     | Mean Microarray Expression Values |                          |                 |                             |                   |                    |
|---------------------|-----------|-----------------------------------|--------------------------|-----------------|-----------------------------|-------------------|--------------------|
|                     |           | Root Hairs (COBL9)                | Non-Hair Epidermis (WER) | Cortex (CORTEX) | Endodermis/ Quiescent (SCR) | Vasculature (WOL) | Columella (PET111) |
| 267412_at           | AT2G34940 | 6.462008533                       | 1.398229189              | 1.386146829     | 0.914879426                 | 1.012712872       | 0.895345279        |
| 267418_at           | AT2G35000 | 2.43688384                        | 1.1273694                | 1.247392859     | 1.359822178                 | 0.86442515        | 1.187316636        |
| 265796_at           | AT2G35730 | 2.761134808                       | 0.586375572              | 0.519412786     | 0.521519992                 | 0.561647321       | 0.494571633        |
| 265802_at           | AT2G35733 | 1.026784531                       | 0.598236744              | 0.555689059     | 0.53539793                  | 0.565186059       | 0.525774062        |
| 263948_at           | AT2G35980 | 2.368344581                       | 0.530315424              | 0.895651177     | 1.208120528                 | 0.734887797       | 0.775919471        |
| 265208_at           | AT2G36690 | 1.560056813                       | 0.680421972              | 0.826093373     | 0.691316549                 | 0.613941431       | 0.679577315        |
| 265471_at           | AT2G37130 | 32.59042463                       | 5.85364894               | 11.54957461     | 3.177536931                 | 5.494709318       | 1.383787376        |
| 265958_at           | AT2G37250 | 13.01248052                       | 7.43121888               | 6.368496466     | 2.785299267                 | 4.484771209       | 3.581681079        |
| 265955_at           | AT2G37280 | 2.198947852                       | 0.531594894              | 0.597872656     | 0.623288302                 | 0.802192481       | 1.048598964        |
| 266004_at           | AT2G37330 | 4.869389806                       | 1.269096842              | 0.767122297     | 0.760372545                 | 0.966835941       | 0.960079732        |
| 266011_at           | AT2G37440 | 3.763772883                       | 1.317115998              | 0.58564371      | 1.371782644                 | 1.113285523       | 0.788548001        |
| 267158_at           | AT2G37640 | 2.763816463                       | 0.627513441              | 1.300261277     | 0.610032703                 | 0.877975039       | 0.543717453        |
| 267160_at           | AT2G37670 | 1.9831187                         | 0.821726928              | 0.658934544     | 0.527714229                 | 0.621620215       | 0.839815341        |
| 266094_at           | AT2G37975 | 7.21507849                        | 3.782819829              | 4.082052587     | 2.4951518                   | 2.689963241       | 3.057746081        |
| 266405_at           | AT2G38580 | 6.130104577                       | 1.962339497              | 2.872548462     | 2.227593829                 | 3.096593471       | 2.676348378        |
| 266168_at           | AT2G38870 | 10.66924619                       | 1.184693368              | 6.26494295      | 2.322079577                 | 1.827112911       | 0.817816958        |
| 266196_at           | AT2G39110 | 10.47976363                       | 4.183033908              | 2.943948858     | 1.726992934                 | 1.405095567       | 0.966346348        |
| 267013_at           | AT2G39180 | 3.991526601                       | 1.89583924               | 1.629492764     | 0.975159666                 | 0.915367461       | 0.734699519        |
| 266963_at           | AT2G39450 | 7.586105892                       | 3.115797264              | 2.72839944      | 1.900642268                 | 2.486283994       | 2.327195198        |
| 267622_at           | AT2G39690 | 1.375822268                       | 0.695772754              | 0.429102049     | 0.427847991                 | 0.5873987         | 0.470776901        |
| 267355_at           | AT2G39900 | 14.3826818                        | 6.691799235              | 8.269039856     | 7.923497604                 | 7.000197983       | 3.929949025        |
| 257382_at           | AT2G40750 | 4.814185166                       | 0.757716761              | 0.447681598     | 0.539166189                 | 0.543450687       | 0.521764795        |
| 267077_at           | AT2G40970 | 7.436810935                       | 2.079815292              | 2.331105391     | 3.502901827                 | 1.932631292       | 1.4217016          |
| 266368_at           | AT2G41380 | 4.845586546                       | 1.339178499              | 2.708098321     | 0.779208407                 | 0.805949648       | 0.585158944        |
| 267582_at           | AT2G41970 | 10.45101406                       | 2.33106297               | 0.695785892     | 0.900905321                 | 1.527694494       | 0.803994113        |
| 265852_at           | AT2G42350 | 2.482037148                       | 0.627948256              | 1.30547765      | 0.747890109                 | 0.813411086       | 0.872293572        |
| 265243_at           | AT2G43040 | 9.05497626                        | 4.20892544               | 1.618731373     | 1.344097286                 | 1.568288443       | 2.985956481        |
| 260540_at           | AT2G43500 | 3.720934349                       | 0.89213403               | 0.822485494     | 0.853706422                 | 0.693468458       | 1.588709343        |
| 260551_at           | AT2G43510 | 3.323534991                       | 0.451095379              | 0.501863971     | 0.578379384                 | 0.624522729       | 0.573895616        |
| 260568_at           | AT2G43570 | 1.776753036                       | 0.763655455              | 0.527296334     | 0.568598101                 | 0.664195656       | 0.83105157         |
| 260556_at           | AT2G43620 | 1.348391006                       | 0.692484414              | 0.585705201     | 0.560479407                 | 0.582695969       | 0.608680301        |

**Supplementary Tables pertaining to Figure 3**

**Supplementary Table S19. Loci enriched in individual cell types from microarray data**

**Loci enriched in Root Hairs (COBL9) from micorarray expression data analysis (1.7 fold, p <0.05)**

| Affymetrix Probeset | Locus     | Mean Microarray Expression Values |                          |                 |                             |                   |                    |
|---------------------|-----------|-----------------------------------|--------------------------|-----------------|-----------------------------|-------------------|--------------------|
|                     |           | Root Hairs (COBL9)                | Non-Hair Epidermis (WER) | Cortex (CORTEX) | Endodermis/ Quiescent (SCR) | Vasculature (WOL) | Columella (PET111) |
| 260567_at           | AT2G43820 | 7.993573688                       | 1.518886714              | 4.29402438      | 0.973286986                 | 0.792926294       | 0.548222108        |
| 267191_at           | AT2G44110 | 4.886959551                       | 2.045126043              | 0.711582736     | 0.767355311                 | 1.364172554       | 0.754656366        |
| 267366_at           | AT2G44310 | 8.88448189                        | 4.917438842              | 4.315086181     | 2.356683665                 | 2.982841163       | 4.55667595         |
| 267384_at           | AT2G44370 | 4.61155777                        | 0.735015593              | 0.703256955     | 0.678875377                 | 0.623770923       | 0.549449363        |
| 267385_at           | AT2G44380 | 6.154266474                       | 1.034326008              | 1.891201642     | 0.865399462                 | 0.939433246       | 0.510082778        |
| 267392_at           | AT2G44490 | 18.78474515                       | 9.977773407              | 10.52106741     | 3.173361401                 | 2.636835067       | 7.595212991        |
| 245148_at           | AT2G45220 | 15.27066991                       | 1.008036751              | 5.779309599     | 2.449249454                 | 3.654054402       | 0.923882421        |
| 266920_at           | AT2G45750 | 34.48351969                       | 9.707075559              | 2.848463255     | 3.229964824                 | 2.85907781        | 1.548906951        |
| 266913_at           | AT2G45890 | 3.963477884                       | 1.49312075               | 0.519398804     | 0.661542469                 | 1.078900335       | 1.206659634        |
| 266553_at           | AT2G46170 | 18.34063912                       | 9.471696347              | 6.218897677     | 3.729242716                 | 6.090601568       | 4.772606606        |
| 265460_at           | AT2G46600 | 14.79606816                       | 2.500822241              | 5.221098529     | 7.290810853                 | 1.964474439       | 1.966962193        |
| 266711_at           | AT2G46740 | 9.673056354                       | 4.065676422              | 0.826213891     | 0.678476769                 | 1.094313156       | 0.607251299        |
| 266712_at           | AT2G46750 | 3.357734515                       | 0.579755351              | 1.467259398     | 0.765694383                 | 0.708229449       | 0.654711752        |
| 266765_at           | AT2G46860 | 1.764491938                       | 0.98508973               | 0.500666439     | 0.496498437                 | 0.665226874       | 0.985998401        |
| 245152_at           | AT2G47490 | 5.73375932                        | 3.282882292              | 3.286436318     | 2.677706299                 | 2.266900616       | 2.715020643        |
| 245172_at           | AT2G47540 | 32.96739091                       | 9.699127898              | 1.158309845     | 1.433289202                 | 2.356085561       | 1.083314431        |
| 245151_at           | AT2G47550 | 13.4250587                        | 1.817021414              | 0.798986382     | 1.029337716                 | 1.338660701       | 1.076701353        |
| 266505_at           | AT2G47830 | 2.269920304                       | 1.213583096              | 0.887048059     | 0.962193522                 | 0.840880473       | 0.956092733        |
| 259271_at           | AT3G01170 | 3.09645428                        | 1.096382249              | 1.567438534     | 1.403232966                 | 0.914204832       | 1.497082315        |
| 259191_at           | AT3G01720 | 23.5379808                        | 11.16311693              | 8.762230777     | 4.359676837                 | 3.904103464       | 2.355777322        |
| 259195_at           | AT3G01730 | 1.576817676                       | 0.780036777              | 0.640815862     | 0.626855878                 | 0.804894899       | 0.720405492        |
| 258976_at           | AT3G01980 | 3.311436514                       | 1.538863661              | 1.433625506     | 0.910342472                 | 0.903743818       | 0.813140559        |
| 259120_at           | AT3G02240 | 1.408113918                       | 0.574340403              | 0.595103776     | 0.411870606                 | 0.488698735       | 0.341007012        |
| 258617_at           | AT3G03000 | 2.715802821                       | 1.273376007              | 1.059572838     | 0.774993497                 | 0.653373457       | 0.499754288        |
| 257529_at           | AT3G03290 | 1.274369906                       | 0.680265301              | 0.409163368     | 0.441423559                 | 0.494582885       | 0.477953435        |
| 259352_at           | AT3G05170 | 4.228062627                       | 1.436779896              | 0.867664563     | 1.795071477                 | 1.020169101       | 0.833375126        |
| 256396_at           | AT3G06150 | 4.334162781                       | 2.201362555              | 2.072172379     | 1.151630921                 | 1.612197273       | 0.850790579        |
| 258911_at           | AT3G06470 | 2.661014641                       | 1.290726771              | 1.239798531     | 0.805609499                 | 1.065344434       | 0.958464612        |
| 258832_at           | AT3G07070 | 2.496995284                       | 1.083196499              | 0.566554065     | 0.684024455                 | 1.160331606       | 0.729202437        |
| 259256_at           | AT3G07680 | 23.09076948                       | 12.08404253              | 10.66737108     | 9.928758973                 | 8.000331407       | 9.199218484        |
| 258637_at           | AT3G07880 | 12.28722963                       | 6.112187776              | 4.425681085     | 3.953455899                 | 4.491110632       | 1.827509242        |

**Supplementary Tables pertaining to Figure 3**

**Supplementary Table S19. Loci enriched in individual cell types from microarray data**

**Loci enriched in Root Hairs (COBL9) from micorarray expression data analysis (1.7 fold, p <0.05)**

| Affymetrix Probeset | Locus     | Mean Microarray Expression Values |                          |                 |                             |                   |                    |
|---------------------|-----------|-----------------------------------|--------------------------|-----------------|-----------------------------|-------------------|--------------------|
|                     |           | Root Hairs (COBL9)                | Non-Hair Epidermis (WER) | Cortex (CORTEX) | Endodermis/ Quiescent (SCR) | Vasculature (WOL) | Columella (PET111) |
| 258648_at           | AT3G07900 | 4.55235999                        | 1.439356768              | 1.650212064     | 1.178614277                 | 1.113371106       | 0.86328258         |
| 258693_at           | AT3G08650 | 9.572019128                       | 2.965711889              | 5.272298586     | 5.441697918                 | 2.745707394       | 5.284087652        |
| 259216_at           | AT3G09000 | 3.647224114                       | 1.41264746               | 1.998966414     | 1.51511486                  | 1.236097911       | 0.868429163        |
| 259033_at           | AT3G09410 | 1.865924178                       | 0.814408668              | 0.889511032     | 0.644881041                 | 0.843009594       | 0.939645282        |
| 258706_at           | AT3G09570 | 10.64242042                       | 6.254772806              | 6.257107233     | 3.948157407                 | 4.305162822       | 4.380872292        |
| 258700_at           | AT3G09710 | 2.182753539                       | 1.103458531              | 0.69640706      | 0.800702212                 | 0.700326791       | 0.704240473        |
| 259137_at           | AT3G10300 | 5.458083495                       | 2.607706054              | 2.400973334     | 2.183791695                 | 0.935049504       | 2.253509665        |
| 256250_at           | AT3G11320 | 10.3583129                        | 5.187835081              | 4.535038833     | 2.594106448                 | 2.734792865       | 2.724080876        |
| 259232_at           | AT3G11420 | 6.682563509                       | 3.206348783              | 2.703167926     | 2.052156658                 | 1.673533786       | 1.369102384        |
| 256778_at           | AT3G13782 | 2.887384596                       | 0.955470118              | 0.562528909     | 0.572054558                 | 0.714142912       | 0.663827907        |
| 257609_at           | AT3G13845 | 5.393557236                       | 3.052023218              | 1.6942331       | 2.015393563                 | 2.193011204       | 1.596505776        |
| 257277_at           | AT3G14470 | 1.803993587                       | 0.797866949              | 0.717805184     | 0.671157317                 | 0.815892396       | 0.985326089        |
| 257217_at           | AT3G14940 | 21.66482989                       | 9.01674642               | 9.144446976     | 6.960980314                 | 3.899949849       | 6.033681646        |
| 258388_at           | AT3G15370 | 1.475868836                       | 0.550970582              | 0.567817689     | 0.574245917                 | 0.615143841       | 0.537473006        |
| 258401_at           | AT3G15430 | 9.261255458                       | 2.771125784              | 3.598055108     | 4.272750578                 | 2.032442181       | 3.91168769         |
| 258399_at           | AT3G15540 | 11.19910566                       | 1.229719752              | 3.006444641     | 6.410496408                 | 6.142001793       | 3.122199711        |
| 258224_at           | AT3G15670 | 1.535799786                       | 0.57246704               | 0.464215566     | 0.599155026                 | 0.653140573       | 0.723072422        |
| 258276_at           | AT3G15710 | 13.90240521                       | 7.794729385              | 6.269796224     | 3.586776238                 | 3.348048056       | 4.043597723        |
| 257887_at           | AT3G17090 | 9.71412898                        | 4.393695835              | 5.310521795     | 5.101056695                 | 3.662302476       | 3.911063432        |
| 258189_at           | AT3G17860 | 7.746246902                       | 3.180362896              | 3.756039455     | 2.093407631                 | 1.973207775       | 1.544373978        |
| 256799_at           | AT3G18560 | 3.796115822                       | 1.40800906               | 1.06748436      | 1.379331537                 | 0.977782692       | 0.68976915         |
| 258005_at           | AT3G19390 | 45.67980509                       | 9.910036249              | 6.948052809     | 13.2628979                  | 4.715079205       | 9.159141317        |
| 256567_at           | AT3G19553 | 2.601628716                       | 1.215159083              | 1.407701617     | 0.975322446                 | 0.869876862       | 0.8827077          |
| 257991_at           | AT3G19870 | 3.530502434                       | 1.836891927              | 2.036387749     | 1.570358474                 | 1.922319843       | 1.77578498         |
| 257095_at           | AT3G20560 | 4.917538145                       | 2.276891307              | 2.44607573      | 1.282244915                 | 2.665728448       | 1.923010036        |
| 257973_at           | AT3G20720 | 3.088828962                       | 1.374896929              | 1.507739837     | 0.963275609                 | 1.277173331       | 1.272756431        |
| 258035_at           | AT3G21180 | 2.215404596                       | 1.243599256              | 0.539101773     | 0.523795495                 | 0.648844626       | 0.590682653        |
| 258173_at           | AT3G21630 | 7.739120222                       | 2.884535144              | 3.192048557     | 3.210376571                 | 1.849461489       | 2.366671797        |
| 257949_at           | AT3G21750 | 9.235258521                       | 1.771031203              | 3.835444303     | 0.960044846                 | 1.037093051       | 1.787826152        |
| 256935_at           | AT3G22570 | 13.4012329                        | 4.645923027              | 5.326161402     | 2.125651533                 | 2.333377183       | 1.121699811        |
| 256829_at           | AT3G22850 | 16.03999436                       | 9.334540764              | 8.3176028       | 5.66847548                  | 4.568495553       | 7.417546757        |

**Supplementary Tables pertaining to Figure 3**

**Supplementary Table S19. Loci enriched in individual cell types from microarray data**

**Loci enriched in Root Hairs (COBL9) from micorarray expression data analysis (1.7 fold, p <0.05)**

| Affymetrix Probeset | Locus     | Mean Microarray Expression Values |                          |                 |                             |                   |                    |
|---------------------|-----------|-----------------------------------|--------------------------|-----------------|-----------------------------|-------------------|--------------------|
|                     |           | Root Hairs (COBL9)                | Non-Hair Epidermis (WER) | Cortex (CORTEX) | Endodermis/ Quiescent (SCR) | Vasculature (WOL) | Columella (PET111) |
| 257924_at           | AT3G23190 | 21.72218486                       | 3.259058347              | 1.083496123     | 1.042912533                 | 1.611341643       | 1.042869254        |
| 256900_at           | AT3G24670 | 30.18156536                       | 11.41166641              | 2.094507336     | 1.749738179                 | 2.223382099       | 3.020972823        |
| 257104_at           | AT3G25040 | 17.95179212                       | 10.01019616              | 10.08243041     | 6.853821736                 | 9.467707714       | 8.265611891        |
| 256883_at           | AT3G26440 | 8.965695213                       | 1.969032802              | 2.346368697     | 1.1751063                   | 1.633034012       | 4.234792677        |
| 257144_at           | AT3G27300 | 6.868998452                       | 3.307803561              | 0.913901483     | 1.479300066                 | 1.013707473       | 1.064181043        |
| 257739_at           | AT3G27470 | 2.651521834                       | 1.462637892              | 1.355414344     | 1.002599024                 | 1.155034138       | 1.381147794        |
| 256847_at           | AT3G27950 | 1.998175467                       | 0.550151778              | 0.514926217     | 0.508795266                 | 0.637481742       | 0.616697319        |
| 256735_at           | AT3G29400 | 4.627570772                       | 1.789604943              | 2.435428438     | 1.928651001                 | 1.439250438       | 1.913458664        |
| 257285_at           | AT3G29760 | 3.16762181                        | 1.784761831              | 1.562461731     | 1.386379715                 | 1.678241868       | 1.384823324        |
| 252692_at           | AT3G43960 | 22.01521924                       | 6.295677247              | 8.970492299     | 5.563284388                 | 2.701750552       | 1.386677567        |
| 252510_at           | AT3G46270 | 2.053416143                       | 0.63522824               | 0.494982955     | 0.520964814                 | 0.638433709       | 0.548979688        |
| 252529_at           | AT3G46490 | 1.690607441                       | 0.812806691              | 0.658570064     | 0.636599993                 | 0.855506934       | 0.782715676        |
| 252494_at           | AT3G46760 | 2.486445167                       | 0.738753177              | 0.515436219     | 0.551952955                 | 0.634019646       | 0.585028391        |
| 252448_at           | AT3G47050 | 1.626564847                       | 0.45645716               | 0.487790571     | 0.511937972                 | 0.596530284       | 0.603057869        |
| 252415_at           | AT3G47340 | 12.8771662                        | 0.81905542               | 3.130852155     | 0.747995212                 | 0.692121925       | 0.574987389        |
| 252383_at           | AT3G47780 | 8.420880724                       | 1.769524499              | 2.263143903     | 4.223285326                 | 1.124125251       | 4.714211006        |
| 252303_at           | AT3G49210 | 3.224002961                       | 1.203311801              | 0.913361846     | 0.822875794                 | 1.068035068       | 0.905221029        |
| 252238_at           | AT3G49960 | 13.36251865                       | 2.159284123              | 0.662687688     | 0.724338558                 | 2.066518106       | 0.92980716         |
| 252194_at           | AT3G50110 | 3.28175064                        | 1.382726828              | 1.229962231     | 1.098779424                 | 1.251344001       | 1.397473518        |
| 252243_at           | AT3G50120 | 1.562246138                       | 0.629592879              | 0.571001216     | 0.621793698                 | 0.459350521       | 0.390073599        |
| 252244_at           | AT3G50130 | 3.813882069                       | 1.532344585              | 0.590535841     | 0.445962301                 | 0.571419077       | 0.494836983        |
| 252218_at           | AT3G50150 | 2.299149845                       | 0.735467202              | 0.467967326     | 0.443074528                 | 0.514705914       | 0.485620247        |
| 252184_at           | AT3G50660 | 11.99408291                       | 1.23125781               | 2.843733991     | 3.799528977                 | 3.637862423       | 1.682901631        |
| 252098_at           | AT3G51330 | 6.057998228                       | 1.467795829              | 0.884668256     | 0.840253723                 | 1.055335117       | 0.597809215        |
| 252103_at           | AT3G51410 | 1.785999105                       | 0.662241529              | 0.570533619     | 0.574461231                 | 0.620933238       | 0.693967185        |
| 252037_at           | AT3G51920 | 8.090151219                       | 4.232698875              | 4.591015635     | 2.540978683                 | 1.255234053       | 3.184677313        |
| 252042_at           | AT3G51990 | 4.170829868                       | 1.756698517              | 1.398947401     | 1.391456281                 | 1.516504175       | 1.571276111        |
| 256682_at           | AT3G52200 | 7.984891274                       | 4.694835772              | 4.589842607     | 3.728121875                 | 3.571322734       | 2.791408709        |
| 252046_at           | AT3G52460 | 2.468624595                       | 0.635392874              | 1.150910001     | 0.663535968                 | 0.774807683       | 0.697114648        |
| 252002_at           | AT3G52760 | 7.234846185                       | 4.017213351              | 3.649580156     | 2.073689146                 | 3.052234455       | 2.428564216        |
| 251970_at           | AT3G53150 | 3.853976945                       | 0.536046506              | 0.496296192     | 0.732434625                 | 0.831544272       | 0.51179788         |

**Supplementary Tables pertaining to Figure 3**

**Supplementary Table S19. Loci enriched in individual cell types from microarray data**

**Loci enriched in Root Hairs (COBL9) from micorarray expression data analysis (1.7 fold, p <0.05)**

| Affymetrix Probeset | Locus     | Mean Microarray Expression Values |                          |                 |                             |                   |                    |
|---------------------|-----------|-----------------------------------|--------------------------|-----------------|-----------------------------|-------------------|--------------------|
|                     |           | Root Hairs (COBL9)                | Non-Hair Epidermis (WER) | Cortex (CORTEX) | Endodermis/ Quiescent (SCR) | Vasculature (WOL) | Columella (PET111) |
| 251973_at           | AT3G53180 | 17.44707864                       | 5.487026304              | 7.01058528      | 3.266296095                 | 2.062995207       | 1.994137427        |
| 251964_at           | AT3G53370 | 7.249020824                       | 3.559157369              | 1.585260973     | 1.022706242                 | 1.700443404       | 0.991775345        |
| 251922_at           | AT3G54030 | 5.4829491                         | 1.573673759              | 2.910459911     | 1.716553206                 | 1.78744965        | 0.958804975        |
| 251918_at           | AT3G54040 | 12.23507987                       | 1.264748702              | 1.111264316     | 1.111210751                 | 2.319559576       | 3.022688389        |
| 251902_at           | AT3G54110 | 21.67162545                       | 9.392183682              | 11.51431959     | 10.69408357                 | 7.858446609       | 10.364703          |
| 251895_at           | AT3G54420 | 5.264517031                       | 0.881242167              | 0.651269795     | 0.632337589                 | 0.604387016       | 0.781069654        |
| 251843_x_at         | AT3G54590 | 14.28121929                       | 6.944181503              | 1.511871871     | 1.30597595                  | 2.094237622       | 1.461822267        |
| 251863_at           | AT3G54870 | 1.809856989                       | 0.655022484              | 0.519157448     | 0.546746883                 | 0.900837546       | 0.556844673        |
| 251832_at           | AT3G55150 | 5.200318271                       | 2.464386055              | 0.787217867     | 0.583522102                 | 0.924520637       | 0.655952259        |
| 251790_at           | AT3G55470 | 2.331564401                       | 1.23276411               | 1.121076324     | 0.788542287                 | 0.614306968       | 0.929755726        |
| 251771_at           | AT3G56000 | 4.60435877                        | 2.321763368              | 0.763838489     | 0.649724063                 | 0.942680229       | 0.677521521        |
| 251705_at           | AT3G56400 | 4.355807572                       | 0.653190732              | 0.640968356     | 0.947536888                 | 0.915155092       | 0.80062936         |
| 246345_at           | AT3G56760 | 7.177714261                       | 1.971052858              | 3.158118144     | 2.361378722                 | 1.842903622       | 2.117564877        |
| 251659_at           | AT3G57090 | 8.191940908                       | 3.560204502              | 3.842638508     | 4.508181456                 | 3.411592869       | 3.108332666        |
| 251649_at           | AT3G57330 | 11.8997992                        | 4.491688951              | 3.477420562     | 1.331531406                 | 1.248567922       | 1.745366774        |
| 251650_at           | AT3G57360 | 3.755770958                       | 1.49323331               | 0.746357638     | 0.968656695                 | 1.439617648       | 0.689491785        |
| 251528_at           | AT3G58600 | 5.771162411                       | 2.957379016              | 3.267839347     | 2.485494203                 | 2.351135617       | 2.819874536        |
| 251505_at           | AT3G59050 | 6.475346946                       | 1.487755463              | 2.360329649     | 2.575092181                 | 1.377693395       | 3.170966565        |
| 251513_at           | AT3G59220 | 12.82876121                       | 2.576407172              | 1.847323118     | 0.791094367                 | 0.895498279       | 1.131321244        |
| 251479_at           | AT3G59700 | 2.671066575                       | 0.574902743              | 0.713276091     | 0.451491928                 | 0.510797327       | 0.458375648        |
| 251433_at           | AT3G59830 | 1.056715023                       | 0.54127093               | 0.437490534     | 0.445956503                 | 0.480602859       | 0.50354099         |
| 251434_at           | AT3G59850 | 4.869690977                       | 2.67965971               | 0.656204855     | 0.54422517                  | 0.711844356       | 0.794193335        |
| 251405_at           | AT3G60330 | 2.637636264                       | 0.758543671              | 0.513371367     | 0.591458916                 | 0.959132737       | 0.597970303        |
| 251422_at           | AT3G60540 | 4.166495789                       | 2.065302766              | 0.933391384     | 1.257622068                 | 1.067117314       | 1.587962903        |
| 251376_at           | AT3G60630 | 7.66651144                        | 3.246928103              | 4.232773771     | 2.193634683                 | 3.214980964       | 2.30997282         |
| 251390_at           | AT3G60860 | 13.06796449                       | 4.877040563              | 7.283858116     | 4.735121957                 | 4.159039705       | 5.137279057        |
| 251334_at           | AT3G61390 | 1.437711756                       | 0.486335551              | 0.70715691      | 0.579756123                 | 0.625787096       | 0.623981509        |
| 255757_at           | AT4G00460 | 4.551345154                       | 1.797268843              | 0.631074526     | 0.505015933                 | 0.665237609       | 0.542453188        |
| 255632_at           | AT4G00680 | 4.514473217                       | 1.806785472              | 0.517800295     | 0.668917123                 | 1.579394832       | 0.653071769        |
| 255595_at           | AT4G01700 | 22.27602292                       | 3.237095138              | 1.418262424     | 1.523122123                 | 1.292804128       | 1.840081927        |

**Supplementary Tables pertaining to Figure 3**

**Supplementary Table S19. Loci enriched in individual cell types from microarray data**

**Loci enriched in Root Hairs (COBL9) from micorarray expression data analysis (1.7 fold, p <0.05)**

| Affymetrix Probeset | Locus     | Mean Microarray Expression Values |                          |                 |                             |                   |                    |
|---------------------|-----------|-----------------------------------|--------------------------|-----------------|-----------------------------|-------------------|--------------------|
|                     |           | Root Hairs (COBL9)                | Non-Hair Epidermis (WER) | Cortex (CORTEX) | Endodermis/ Quiescent (SCR) | Vasculature (WOL) | Columella (PET111) |
| 255516_at           | AT4G02270 | 7.93013998                        | 2.952439528              | 0.95713522      | 1.206665242                 | 3.144892266       | 2.642431315        |
| 255500_at           | AT4G02390 | 2.375428581                       | 0.895506432              | 0.739038475     | 0.890438518                 | 1.370385728       | 0.965305555        |
| 255498_at           | AT4G02620 | 25.27088902                       | 13.44049723              | 14.5931983      | 10.99220851                 | 9.544771523       | 8.922731599        |
| 255432_at           | AT4G03330 | 2.885972481                       | 1.035702974              | 0.552881496     | 0.638230113                 | 0.95542203        | 0.650887907        |
| 255408_at           | AT4G03490 | 2.896487105                       | 1.010370239              | 0.786628801     | 0.678478225                 | 0.770287024       | 0.822828463        |
| 255380_at           | AT4G03560 | 21.29456221                       | 8.60747289               | 11.95055545     | 4.031828951                 | 4.611917988       | 4.99347139         |
| 255295_at           | AT4G04760 | 2.55402657                        | 0.831271196              | 0.881175573     | 0.735086909                 | 0.817056777       | 0.954564434        |
| 255276_at           | AT4G04930 | 1.645479217                       | 0.501509092              | 0.476316073     | 0.511286785                 | 0.503198946       | 0.627458433        |
| 255175_at           | AT4G07960 | 4.226820284                       | 1.329342315              | 0.613447613     | 0.661056646                 | 0.889082185       | 0.699073669        |
| 255074_at           | AT4G09100 | 4.250979095                       | 0.631246147              | 0.49038155      | 0.553464728                 | 0.647994396       | 0.520752271        |
| 255039_at           | AT4G09570 | 9.822102974                       | 2.072879749              | 4.145314581     | 3.591084946                 | 1.68834362        | 2.337475009        |
| 255005_at           | AT4G09990 | 23.18906269                       | 6.882259296              | 1.22080574      | 1.440892545                 | 3.997105863       | 4.500734934        |
| 255810_at           | AT4G10140 | 8.367286378                       | 3.214671312              | 4.690765911     | 2.739874667                 | 2.858116039       | 4.644421253        |
| 254858_at           | AT4G12070 | 2.825566939                       | 1.231977115              | 1.268696065     | 1.385422284                 | 1.27577464        | 0.954918875        |
| 254809_at           | AT4G12410 | 4.233495039                       | 0.5377109                | 0.709635627     | 1.11490582                  | 1.118685962       | 1.065638209        |
| 254774_at           | AT4G13440 | 4.77432324                        | 2.636728469              | 0.830172256     | 0.663512271                 | 0.851719191       | 0.688014804        |
| 245611_at           | AT4G14390 | 3.383242585                       | 0.886523883              | 0.696796673     | 0.92446555                  | 0.755076148       | 0.732251531        |
| 245397_at           | AT4G14560 | 8.141363682                       | 2.965316658              | 1.252330255     | 1.531203362                 | 1.982792274       | 4.180074523        |
| 245577_at           | AT4G14780 | 1.23401673                        | 0.688162313              | 0.721337422     | 0.688923704                 | 0.685666265       | 0.658718152        |
| 245556_at           | AT4G15400 | 1.680822341                       | 0.621981974              | 0.963489921     | 0.587153547                 | 0.631633746       | 0.5971374          |
| 245561_at           | AT4G15500 | 2.445326928                       | 1.372272837              | 1.042517787     | 0.919296959                 | 0.918564657       | 0.795988551        |
| 245484_at           | AT4G16210 | 7.255701671                       | 3.227990117              | 3.411651512     | 1.934220883                 | 1.75728261        | 1.863429591        |
| 245300_at           | AT4G16350 | 1.871718581                       | 0.881394576              | 0.534552657     | 0.541562196                 | 0.657485796       | 0.57949774         |
| 245495_at           | AT4G16400 | 2.00645634                        | 0.72529074               | 1.010162586     | 0.936737632                 | 1.088995138       | 1.103601682        |
| 245466_at           | AT4G16600 | 2.849257546                       | 0.621130092              | 0.633588218     | 0.645226602                 | 0.806109825       | 0.724790435        |
| 245454_at           | AT4G16920 | 1.739653613                       | 0.479325369              | 0.547592747     | 0.434154763                 | 0.455619004       | 0.490978206        |
| 245416_at           | AT4G17350 | 4.53915381                        | 1.682513565              | 1.100975826     | 1.857346662                 | 1.672725476       | 1.522701338        |
| 245428_at           | AT4G17570 | 2.155656955                       | 1.041506388              | 1.030390777     | 0.900705962                 | 1.226402433       | 1.153493402        |
| 254632_at           | AT4G18630 | 1.73256645                        | 0.663714914              | 0.430612245     | 0.446538193                 | 0.531047758       | 0.510046334        |
| 254468_at           | AT4G20460 | 13.0876895                        | 4.470302291              | 3.746529008     | 3.537187832                 | 1.671318347       | 1.008696536        |
| 254461_at           | AT4G21230 | 2.508780192                       | 0.975294344              | 1.108573274     | 0.674165261                 | 0.884915714       | 0.767902815        |

**Supplementary Tables pertaining to Figure 3**

**Supplementary Table S19. Loci enriched in individual cell types from microarray data**

**Loci enriched in Root Hairs (COBL9) from micorarray expression data analysis (1.7 fold, p <0.05)**

| Affymetrix Probeset | Locus     | Mean Microarray Expression Values |                          |                 |                             |                   |                    |
|---------------------|-----------|-----------------------------------|--------------------------|-----------------|-----------------------------|-------------------|--------------------|
|                     |           | Root Hairs (COBL9)                | Non-Hair Epidermis (WER) | Cortex (CORTEX) | Endodermis/ Quiescent (SCR) | Vasculature (WOL) | Columella (PET111) |
| 254347_at           | AT4G22070 | 1.645989971                       | 0.539691338              | 0.658612245     | 0.56859302                  | 0.712304171       | 0.726394875        |
| 254318_at           | AT4G22530 | 6.07985444                        | 2.4811917                | 3.094165243     | 3.348562916                 | 1.492829938       | 1.496082312        |
| 254267_at           | AT4G22930 | 14.79169915                       | 8.406197905              | 8.197732258     | 3.283791756                 | 3.374895094       | 4.512784422        |
| 254261_at           | AT4G23460 | 4.913570803                       | 2.74656845               | 2.612006222     | 1.75471082                  | 1.969443989       | 1.97147206         |
| 254215_at           | AT4G23700 | 2.28855963                        | 0.828926545              | 0.841309741     | 0.942579143                 | 1.268657033       | 0.702580663        |
| 254205_at           | AT4G24170 | 2.541415139                       | 0.555319973              | 0.833824515     | 1.100229024                 | 0.714342051       | 1.269944883        |
| 254167_at           | AT4G24400 | 8.556951213                       | 3.055077006              | 3.569932645     | 3.752792901                 | 2.966528648       | 2.765008762        |
| 254085_at           | AT4G24960 | 6.720333131                       | 1.895884995              | 0.839744177     | 3.62693022                  | 1.397698323       | 1.422131184        |
| 254091_at           | AT4G25070 | 1.28823259                        | 0.749282576              | 0.615659574     | 0.753322476                 | 0.709125727       | 0.682521207        |
| 254093_at           | AT4G25110 | 1.030427978                       | 0.514093154              | 0.492396776     | 0.555914992                 | 0.561845995       | 0.544909793        |
| 254097_at           | AT4G25160 | 1.349778461                       | 0.483458859              | 0.403225388     | 0.434632069                 | 0.554325756       | 0.470818414        |
| 254040_at           | AT4G25900 | 16.18073209                       | 8.984956168              | 6.450858288     | 2.031652749                 | 2.274305352       | 8.014971964        |
| 253998_at           | AT4G26010 | 9.313683744                       | 3.343634451              | 1.56439787      | 3.970742651                 | 4.182537327       | 1.419425618        |
| 253989_at           | AT4G26130 | 1.532684082                       | 0.749840922              | 0.842386667     | 0.524493931                 | 0.634376777       | 0.546125006        |
| 253963_at           | AT4G26470 | 5.681725317                       | 3.329103525              | 1.368537399     | 0.734244797                 | 0.872016445       | 1.298110245        |
| 253931_at           | AT4G26770 | 2.255410817                       | 0.989911718              | 0.616450985     | 0.57473573                  | 0.725410582       | 0.66927416         |
| 253950_at           | AT4G26910 | 19.56289608                       | 8.356714919              | 8.813141665     | 6.332822785                 | 7.146649018       | 3.741329144        |
| 253954_at           | AT4G26970 | 42.54898087                       | 14.07009907              | 15.42773914     | 16.85525481                 | 11.69411447       | 12.42542248        |
| 253899_at           | AT4G27080 | 13.23630762                       | 6.181312376              | 7.379709905     | 2.823811382                 | 4.812224782       | 4.572839209        |
| 253910_at           | AT4G27290 | 1.678443934                       | 0.537109617              | 0.421651348     | 0.441669363                 | 0.501822209       | 0.457714061        |
| 253866_at           | AT4G27480 | 11.29045092                       | 1.776975459              | 0.818744016     | 0.748103518                 | 0.791237637       | 0.730851901        |
| 253868_at           | AT4G27500 | 27.14706822                       | 15.02365666              | 14.69241117     | 12.78624946                 | 11.45519661       | 12.32247708        |
| 253793_at           | AT4G28710 | 1.557815336                       | 0.787492813              | 0.757428792     | 0.765030946                 | 0.745952569       | 0.820964334        |
| 253743_at           | AT4G28940 | 2.487584086                       | 1.103004153              | 1.322137326     | 1.43162879                  | 1.374468693       | 1.437255668        |
| 253705_at           | AT4G29130 | 13.34716868                       | 7.375211193              | 7.344171417     | 4.40209725                  | 4.619935532       | 4.692424468        |
| 253619_at           | AT4G30460 | 6.562656737                       | 1.395371588              | 0.589257585     | 1.53032949                  | 1.388205054       | 1.450272113        |
| 253622_at           | AT4G30560 | 3.878105876                       | 0.774425928              | 0.573499224     | 0.684043707                 | 0.857306875       | 0.653154757        |
| 253627_at           | AT4G30650 | 13.11129069                       | 3.91211174               | 2.601327584     | 0.873741815                 | 0.780974773       | 1.171705782        |
| 253401_at           | AT4G32870 | 12.48706754                       | 6.942178701              | 2.215154991     | 1.217460184                 | 1.653533539       | 5.705287118        |
| 253407_at           | AT4G32920 | 5.227763736                       | 1.524990432              | 1.068684666     | 1.133264362                 | 1.601093372       | 1.493190717        |
| 253408_at           | AT4G32950 | 1.448583465                       | 0.543809554              | 0.595107804     | 0.646084176                 | 0.664739292       | 0.62853965         |



**Supplementary Tables pertaining to Figure 3**

**Supplementary Table S19. Loci enriched in individual cell types from microarray data**

**Loci enriched in Root Hairs (COBL9) from micorarray expression data analysis (1.7 fold, p <0.05)**

| Affymetrix Probeset | Locus     | Mean Microarray Expression Values |                          |                 |                             |                   |                    |
|---------------------|-----------|-----------------------------------|--------------------------|-----------------|-----------------------------|-------------------|--------------------|
|                     |           | Root Hairs (COBL9)                | Non-Hair Epidermis (WER) | Cortex (CORTEX) | Endodermis/ Quiescent (SCR) | Vasculature (WOL) | Columella (PET111) |
| 253334_at           | AT4G33360 | 21.32800628                       | 9.933270834              | 11.68753923     | 5.905846874                 | 4.240005569       | 5.763250759        |
| 253309_at           | AT4G33790 | 5.964971698                       | 1.204887676              | 1.355141928     | 2.336731327                 | 2.913939343       | 0.99393283         |
| 253211_at           | AT4G34880 | 2.31077032                        | 1.295630821              | 1.265611902     | 0.570946343                 | 0.579843878       | 0.982016391        |
| 253193_at           | AT4G35380 | 10.35755024                       | 3.236258386              | 1.391939891     | 0.64126968                  | 0.875293232       | 2.010794689        |
| 253147_at           | AT4G35600 | 4.071440127                       | 1.590257447              | 2.073189572     | 1.667791525                 | 0.807479621       | 1.500991542        |
| 253161_at           | AT4G35770 | 3.083024028                       | 0.50759114               | 0.838970901     | 0.550977147                 | 0.569690256       | 0.667361195        |
| 246239_at           | AT4G36790 | 4.625789416                       | 1.935309911              | 2.530307981     | 1.797133457                 | 1.684245884       | 1.518588459        |
| 246250_at           | AT4G36880 | 5.929685465                       | 1.002287296              | 0.764896191     | 0.873111978                 | 1.030960717       | 0.666406206        |
| 253100_at           | AT4G37400 | 13.39416986                       | 7.272346192              | 5.253612997     | 2.539776419                 | 1.442233104       | 5.248813869        |
| 253063_at           | AT4G37640 | 19.43243304                       | 6.665421328              | 3.365535725     | 5.698896686                 | 4.586725538       | 3.953022243        |
| 252964_at           | AT4G38830 | 2.285198531                       | 0.714144934              | 0.546185627     | 0.559639623                 | 0.681374705       | 0.58046079         |
| 252931_at           | AT4G38930 | 3.157412648                       | 1.652847383              | 1.670206946     | 1.479408965                 | 1.266783636       | 1.432269097        |
| 252936_at           | AT4G39160 | 2.503743609                       | 1.068510792              | 0.642753536     | 0.827859388                 | 1.055940314       | 0.836815288        |
| 252940_at           | AT4G39270 | 6.331801728                       | 2.519490231              | 3.282470343     | 1.181871825                 | 0.927012503       | 1.420282712        |
| 252834_at           | AT4G40070 | 1.716236736                       | 0.637932456              | 0.747426445     | 0.835525157                 | 0.785054641       | 0.750415934        |
| 252833_at           | AT4G40090 | 5.946773827                       | 1.903089487              | 0.910895675     | 0.928715095                 | 2.681102717       | 1.03291297         |
| 251135_at           | AT5G01280 | 1.652413824                       | 0.520290628              | 0.527845421     | 0.506393977                 | 0.624713756       | 0.691418312        |
| 251053_at           | AT5G01490 | 5.051894591                       | 1.285985992              | 1.129202786     | 1.075101806                 | 1.266406441       | 1.097014078        |
| 251054_at           | AT5G01540 | 1.366871513                       | 0.585790207              | 0.662358979     | 0.621665847                 | 0.636968583       | 0.670641107        |
| 251023_at           | AT5G02170 | 6.808518095                       | 3.184217636              | 1.357796297     | 0.759632861                 | 0.751344082       | 1.200685802        |
| 251044_at           | AT5G02350 | 5.450977327                       | 1.388910759              | 0.631936428     | 0.461455287                 | 0.678321972       | 0.508380464        |
| 250929_at           | AT5G03290 | 27.17209065                       | 13.43308419              | 11.81860855     | 8.816235827                 | 7.932391613       | 7.486235313        |
| 250922_at           | AT5G03345 | 21.12970757                       | 11.73869274              | 11.75184544     | 7.737895163                 | 10.83611117       | 7.706720345        |
| 245705_at           | AT5G04390 | 1.072123311                       | 0.581134775              | 0.408289465     | 0.469732807                 | 0.58013847        | 0.578433161        |
| 246952_at           | AT5G04820 | 11.27574403                       | 2.556153122              | 3.864293182     | 2.810327131                 | 1.608399392       | 1.633199516        |
| 250771_at           | AT5G05400 | 2.144596017                       | 0.820286164              | 0.72013605      | 0.57354901                  | 0.842211581       | 0.61543483         |
| 250778_at           | AT5G05500 | 18.85910645                       | 5.954150811              | 0.768500121     | 0.944910559                 | 2.540750649       | 0.962593316        |
| 250754_at           | AT5G05700 | 2.930038687                       | 1.57204554               | 1.710872333     | 1.444790335                 | 1.292816075       | 1.281075345        |
| 250723_at           | AT5G06300 | 6.946365553                       | 3.645085265              | 3.959455036     | 2.002126984                 | 1.621896717       | 0.82240771         |
| 250670_at           | AT5G06860 | 26.34733329                       | 12.35455018              | 9.836196755     | 1.685113374                 | 1.906097071       | 1.247939629        |
| 250653_at           | AT5G06930 | 4.431232697                       | 1.479017195              | 2.593706452     | 0.809350006                 | 1.147998061       | 1.351417875        |

**Supplementary Tables pertaining to Figure 3**

**Supplementary Table S19. Loci enriched in individual cell types from microarray data**

**Loci enriched in Root Hairs (COBL9) from micorarray expression data analysis (1.7 fold, p <0.05)**

| Affymetrix Probeset | Locus     | Mean Microarray Expression Values |                          |                 |                             |                   |                    |
|---------------------|-----------|-----------------------------------|--------------------------|-----------------|-----------------------------|-------------------|--------------------|
|                     |           | Root Hairs (COBL9)                | Non-Hair Epidermis (WER) | Cortex (CORTEX) | Endodermis/ Quiescent (SCR) | Vasculature (WOL) | Columella (PET111) |
| 250673_at           | AT5G07070 | 2.263454931                       | 0.742123453              | 1.126455291     | 1.086599995                 | 0.909461579       | 0.85908011         |
| 250632_at           | AT5G07450 | 1.912752043                       | 0.792239478              | 0.504086746     | 0.531580266                 | 0.80986173        | 0.73576784         |
| 250407_at           | AT5G10870 | 3.895942194                       | 1.769543883              | 1.700219047     | 1.078333817                 | 1.035255161       | 1.508379992        |
| 250395_at           | AT5G10950 | 3.162264587                       | 1.024282788              | 0.791167605     | 0.910257584                 | 1.22058232        | 0.85532637         |
| 245904_at           | AT5G11110 | 7.862524737                       | 4.388461334              | 1.093931691     | 1.594767907                 | 1.640753731       | 2.354147606        |
| 250327_at           | AT5G12050 | 7.89358783                        | 2.273571274              | 0.560239094     | 0.605830357                 | 1.96969656        | 1.279980661        |
| 250323_at           | AT5G12880 | 12.97385661                       | 4.966051493              | 4.426201708     | 4.401764428                 | 1.364730666       | 0.914082186        |
| 245979_at           | AT5G13150 | 8.020604473                       | 2.307000234              | 0.687349661     | 0.580167209                 | 0.919587243       | 0.651737521        |
| 245986_at           | AT5G13160 | 4.430257039                       | 1.877931226              | 2.524771524     | 1.654366766                 | 1.480558756       | 2.275319112        |
| 245853_at           | AT5G13500 | 14.48042558                       | 7.26215885               | 3.291276294     | 1.980211556                 | 2.734438558       | 3.01665721         |
| 250210_at           | AT5G13890 | 7.259488738                       | 3.757412645              | 2.548292428     | 3.651160245                 | 2.14435563        | 2.300141961        |
| 250231_at           | AT5G13910 | 11.62877355                       | 3.223185066              | 1.85161745      | 5.667857017                 | 1.69338548        | 1.173556185        |
| 250204_at           | AT5G13990 | 9.238265808                       | 2.496163882              | 0.69093935      | 0.602629336                 | 0.807274149       | 0.600549086        |
| 246540_at           | AT5G15600 | 6.23684959                        | 3.28361613               | 2.349131431     | 2.172232714                 | 2.709787817       | 1.564050433        |
| 246482_at           | AT5G15930 | 3.58985372                        | 1.748024774              | 1.890566846     | 1.634595568                 | 1.714965485       | 1.793479257        |
| 246488_at           | AT5G16010 | 14.0750525                        | 0.754137158              | 7.461563353     | 2.35283969                  | 1.236339692       | 1.311095935        |
| 246507_at           | AT5G16120 | 3.800776556                       | 1.256839222              | 1.083858547     | 1.723256467                 | 1.78063805        | 1.498767514        |
| 250130_at           | AT5G16510 | 18.52886554                       | 10.09656887              | 7.95354277      | 3.273278789                 | 5.151681956       | 6.788080041        |
| 246459_at           | AT5G16900 | 1.904548067                       | 0.697386035              | 0.554491254     | 0.59226395                  | 0.607284425       | 0.899612136        |
| 246460_at           | AT5G16910 | 23.382693                         | 7.009779079              | 7.615352929     | 5.84508864                  | 3.441169433       | 3.716799621        |
| 246416_at           | AT5G16920 | 1.037547387                       | 0.464711309              | 0.41741015      | 0.445735467                 | 0.488588155       | 0.542261037        |
| 249974_at           | AT5G18780 | 3.337029788                       | 0.89152684               | 1.420332893     | 1.259949712                 | 1.049370088       | 1.227016684        |
| 245951_at           | AT5G19550 | 11.59317697                       | 6.695547447              | 5.114149663     | 3.442232389                 | 4.170106969       | 2.680575738        |
| 246146_at           | AT5G20050 | 6.717661974                       | 2.770809568              | 3.698749025     | 2.105363561                 | 1.464989542       | 2.97508085         |
| 246188_at           | AT5G21050 | 3.594813223                       | 1.219691943              | 1.146126488     | 0.774063803                 | 0.87569031        | 1.118343849        |
| 249893_at           | AT5G22555 | 1.009703564                       | 0.405048786              | 0.488257766     | 0.520546414                 | 0.575717488       | 0.518088886        |
| 249890_at           | AT5G22570 | 10.1890693                        | 0.538659503              | 0.538455843     | 1.168906563                 | 0.668593669       | 4.940096655        |
| 249882_at           | AT5G22890 | 1.610588763                       | 0.81490316               | 0.679344969     | 0.472384343                 | 0.561013994       | 0.620345806        |
| 249868_at           | AT5G23030 | 1.598937677                       | 0.749405078              | 0.46212012      | 0.545782927                 | 0.843736394       | 0.515619614        |
| 249767_at           | AT5G24090 | 6.283856341                       | 3.141567928              | 1.529744433     | 1.054970449                 | 1.155865351       | 0.764879446        |
| 249773_at           | AT5G24140 | 3.706714277                       | 1.215331614              | 1.011313995     | 0.703198155                 | 1.093390007       | 0.632500368        |

**Supplementary Tables pertaining to Figure 3**

**Supplementary Table S19. Loci enriched in individual cell types from microarray data**

**Loci enriched in Root Hairs (COBL9) from micorarray expression data analysis (1.7 fold, p <0.05)**

| Affymetrix Probeset | Locus     | Mean Microarray Expression Values |                          |                 |                             |                   |                    |
|---------------------|-----------|-----------------------------------|--------------------------|-----------------|-----------------------------|-------------------|--------------------|
|                     |           | Root Hairs (COBL9)                | Non-Hair Epidermis (WER) | Cortex (CORTEX) | Endodermis/ Quiescent (SCR) | Vasculature (WOL) | Columella (PET111) |
| 249790_at           | AT5G24290 | 9.120365083                       | 3.092209555              | 3.610753085     | 1.266587047                 | 1.133778072       | 2.314905772        |
| 249786_at           | AT5G24310 | 8.632741039                       | 1.527333345              | 0.659005005     | 0.993251394                 | 1.342619599       | 1.304892815        |
| 246968_at           | AT5G24870 | 3.935739821                       | 0.903581394              | 0.792938409     | 0.680522181                 | 0.712088395       | 0.732894026        |
| 246969_at           | AT5G24880 | 2.886529896                       | 0.704898108              | 0.431531589     | 0.548929275                 | 0.640865769       | 0.422184143        |
| 246943_at           | AT5G25440 | 2.119862026                       | 0.673493892              | 0.711646627     | 0.752871473                 | 0.693300736       | 0.701023475        |
| 246912_at           | AT5G25820 | 3.548015457                       | 1.242779914              | 0.931364889     | 0.671960375                 | 0.729119761       | 1.068741499        |
| 246915_at           | AT5G25880 | 2.796678753                       | 0.765025506              | 0.821434851     | 0.909367272                 | 0.901338599       | 0.86556672         |
| 246868_at           | AT5G26010 | 2.6937536                         | 1.183549451              | 1.168703277     | 0.679253469                 | 0.989640346       | 0.586832824        |
| 246807_at           | AT5G27100 | 4.303514897                       | 1.230282029              | 0.775420987     | 0.724209767                 | 0.858561375       | 0.735242624        |
| 255859_at           | AT5G34930 | 6.922651718                       | 2.568153986              | 2.036280196     | 1.276673794                 | 1.719267217       | 1.609474289        |
| 249720_at           | AT5G35700 | 7.705567526                       | 4.020874453              | 2.633567051     | 1.88298418                  | 2.888773354       | 2.6093874          |
| 249603_at           | AT5G37210 | 1.35307409                        | 0.76253381               | 0.638417686     | 0.597299285                 | 0.665176696       | 0.710147125        |
| 249526_at           | AT5G38560 | 5.713536697                       | 2.161530408              | 3.226351405     | 1.644416655                 | 1.75420081        | 3.098610476        |
| 249523_at           | AT5G38630 | 13.95059879                       | 7.524777556              | 8.177452864     | 6.369102069                 | 5.203969568       | 5.770176552        |
| 249527_at           | AT5G38710 | 3.850061008                       | 0.471455046              | 1.895404434     | 0.687780251                 | 0.544912691       | 1.041768607        |
| 249406_at           | AT5G40210 | 3.663210861                       | 0.950043059              | 0.742629017     | 0.715272685                 | 0.788129267       | 0.968603561        |
| 249358_at           | AT5G40510 | 18.47005746                       | 9.378377311              | 1.725967209     | 0.99736733                  | 1.859225214       | 1.627568323        |
| 249364_at           | AT5G40590 | 2.850210214                       | 0.511725495              | 0.498593931     | 0.469731746                 | 0.51587175        | 0.42702145         |
| 249348_at           | AT5G40860 | 3.232423344                       | 0.715369175              | 0.61535581      | 0.667256624                 | 0.810913963       | 0.668323757        |
| 249295_at           | AT5G41280 | 1.633297159                       | 0.75945754               | 0.652997676     | 0.614101879                 | 0.664877401       | 0.861047308        |
| 249283_at           | AT5G41800 | 3.927418606                       | 1.811673959              | 1.358871753     | 0.83103696                  | 0.993046279       | 1.473831806        |
| 249284_at           | AT5G41810 | 5.631745836                       | 2.669748881              | 2.35952257      | 1.57887439                  | 0.760668698       | 2.384026749        |
| 249166_at           | AT5G42840 | 2.323053235                       | 0.987453817              | 0.934161636     | 0.672025613                 | 0.827234897       | 0.775031979        |
| 249169_at           | AT5G42880 | 1.604841468                       | 0.621996779              | 0.715544879     | 0.80971795                  | 0.919262534       | 0.4705876          |
| 249185_at           | AT5G43030 | 6.201385656                       | 3.246684562              | 2.496118299     | 0.81621984                  | 1.0503369         | 1.241870729        |
| 249140_at           | AT5G43190 | 6.1537175                         | 1.721613587              | 2.29587057      | 1.177006423                 | 1.179535466       | 1.612429587        |
| 249151_at           | AT5G43360 | 1.287406188                       | 0.562344859              | 0.617377338     | 0.579983879                 | 0.668643132       | 0.646638923        |
| 249097_at           | AT5G43520 | 2.56843944                        | 0.644986897              | 0.689696773     | 0.697470206                 | 0.658594924       | 0.602520463        |
| 254521_at           | AT5G44820 | 6.841962989                       | 1.916413575              | 0.980855352     | 0.478916603                 | 0.663954812       | 0.536020969        |
| 249029_at           | AT5G44870 | 1.17502233                        | 0.553311476              | 0.645901657     | 0.635927174                 | 0.636500685       | 0.580042945        |
| 248971_at           | AT5G45000 | 1.23958975                        | 0.592966073              | 0.455300293     | 0.482626096                 | 0.568087504       | 0.571831775        |

**Supplementary Tables pertaining to Figure 3**

**Supplementary Table S19. Loci enriched in individual cell types from microarray data**

**Loci enriched in Root Hairs (COBL9) from micorarray expression data analysis (1.7 fold, p <0.05)**

| Affymetrix Probeset | Locus     | Mean Microarray Expression Values |                          |                 |                             |                   |                    |
|---------------------|-----------|-----------------------------------|--------------------------|-----------------|-----------------------------|-------------------|--------------------|
|                     |           | Root Hairs (COBL9)                | Non-Hair Epidermis (WER) | Cortex (CORTEX) | Endodermis/ Quiescent (SCR) | Vasculature (WOL) | Columella (PET111) |
| 248968_at           | AT5G45280 | 33.5922454                        | 19.23376925              | 6.314854752     | 4.083588372                 | 4.464316433       | 17.88034752        |
| 248944_at           | AT5G45500 | 11.86166468                       | 3.328144463              | 2.961919151     | 1.863988242                 | 1.920359874       | 2.004143219        |
| 248916_at           | AT5G45840 | 1.837767374                       | 0.726275612              | 0.431827058     | 0.496014332                 | 0.630540925       | 0.463831419        |
| 248927_at           | AT5G45900 | 6.211619934                       | 2.337394506              | 2.184005953     | 1.62638641                  | 1.633816077       | 2.048902093        |
| 248889_at           | AT5G46230 | 7.467477658                       | 3.912692635              | 1.395961061     | 0.767203293                 | 0.942588055       | 2.068579134        |
| 248896_at           | AT5G46350 | 1.128452617                       | 0.482739215              | 0.58567703      | 0.486189975                 | 0.528170841       | 0.584291324        |
| 248848_at           | AT5G46520 | 1.033002664                       | 0.395552738              | 0.413837827     | 0.386452463                 | 0.411544114       | 0.448873474        |
| 248717_at           | AT5G48175 | 4.913977208                       | 0.686465637              | 0.757125453     | 0.688546001                 | 0.721990406       | 0.585233875        |
| 248703_at           | AT5G48430 | 5.896273359                       | 0.896106438              | 0.98744582      | 0.733935946                 | 0.804668704       | 0.838532479        |
| 248652_at           | AT5G49270 | 26.35831667                       | 7.037165721              | 1.699631882     | 1.95741069                  | 2.557357167       | 1.480283545        |
| 248562_at           | AT5G49680 | 4.531574955                       | 2.098588537              | 0.756013934     | 0.716298602                 | 0.841458557       | 1.624108895        |
| 248577_at           | AT5G49870 | 2.719736063                       | 0.401791216              | 0.419586078     | 0.447657422                 | 0.530524983       | 0.483053734        |
| 248486_at           | AT5G51060 | 17.51153053                       | 6.497931076              | 5.55476262      | 2.053632541                 | 1.762235332       | 1.071269601        |
| 248464_at           | AT5G51160 | 3.456941032                       | 0.893563556              | 1.029638813     | 0.71743154                  | 0.722989583       | 0.952923748        |
| 248441_at           | AT5G51270 | 1.272967327                       | 0.667506578              | 0.472598987     | 0.57735282                  | 0.634746297       | 0.635870274        |
| 248410_at           | AT5G51570 | 8.888934691                       | 4.916403957              | 4.167028708     | 3.016956009                 | 2.523620558       | 2.914209189        |
| 248422_at           | AT5G51640 | 4.783617579                       | 2.253976148              | 2.272141537     | 1.722115461                 | 1.699485995       | 2.655548205        |
| 248337_at           | AT5G52310 | 12.18303981                       | 0.576527049              | 4.02102642      | 2.562234748                 | 1.216544632       | 1.508786369        |
| 248311_at           | AT5G52570 | 1.680955959                       | 0.602392927              | 0.619736348     | 0.914502915                 | 0.643538886       | 0.689642871        |
| 248212_at           | AT5G54020 | 4.746385224                       | 1.562997089              | 1.958563523     | 1.277321672                 | 1.081410042       | 0.783317653        |
| 248183_at           | AT5G54040 | 3.033789309                       | 0.734949448              | 0.48677376      | 0.477670953                 | 0.79060684        | 0.544503946        |
| 248184_at           | AT5G54050 | 1.112848787                       | 0.459147903              | 0.389924327     | 0.407694745                 | 0.477222448       | 0.446100011        |
| 248191_at           | AT5G54130 | 1.813955798                       | 0.628922623              | 0.488073183     | 0.595609772                 | 0.898718546       | 0.930268345        |
| 248192_at           | AT5G54140 | 3.1868222                         | 1.603125196              | 1.431474302     | 0.842761514                 | 0.969669421       | 1.567585434        |
| 248164_at           | AT5G54490 | 12.39953106                       | 1.32071199               | 2.376984482     | 4.930748485                 | 1.810383194       | 5.614316232        |
| 248162_at           | AT5G54500 | 18.76963794                       | 5.053339414              | 10.44207374     | 10.17027372                 | 6.89654573        | 7.866507718        |
| 248087_at           | AT5G55060 | 3.631000152                       | 1.487545128              | 2.122045849     | 1.890489216                 | 1.723335092       | 1.929815669        |
| 248082_at           | AT5G55400 | 4.750535434                       | 1.663175031              | 1.255649222     | 1.301659005                 | 1.441741409       | 2.273008241        |
| 247983_at           | AT5G56630 | 16.60026136                       | 5.88132296               | 8.534162826     | 8.390648068                 | 4.285109015       | 8.835033888        |
| 247869_at           | AT5G57520 | 0.976820276                       | 0.463855764              | 0.443104989     | 0.432310542                 | 0.513792399       | 0.491953023        |
| 247895_at           | AT5G58010 | 7.142999889                       | 1.383331552              | 0.929829614     | 0.922431727                 | 1.054487133       | 0.930618224        |

**Supplementary Tables pertaining to Figure 3**

**Supplementary Table S19. Loci enriched in individual cell types from microarray data**

**Loci enriched in Root Hairs (COBL9) from micorarray expression data analysis (1.7 fold, p <0.05)**

| Affymetrix Probeset | Locus     | Mean Microarray Expression Values |                          |                 |                             |                   |                    |
|---------------------|-----------|-----------------------------------|--------------------------|-----------------|-----------------------------|-------------------|--------------------|
|                     |           | Root Hairs (COBL9)                | Non-Hair Epidermis (WER) | Cortex (CORTEX) | Endodermis/ Quiescent (SCR) | Vasculature (WOL) | Columella (PET111) |
| 247820_at           | AT5G58380 | 4.748631993                       | 1.785180744              | 2.0777236       | 1.869206572                 | 1.73304431        | 1.915591822        |
| 247768_at           | AT5G58900 | 5.91148402                        | 1.41125626               | 2.067765467     | 0.974293895                 | 1.251903455       | 1.802991181        |
| 247725_at           | AT5G59410 | 6.245226008                       | 3.617884516              | 3.60644131      | 1.606107496                 | 2.485447723       | 2.985135717        |
| 247678_at           | AT5G59520 | 11.98264861                       | 2.874671419              | 5.316820101     | 1.804079937                 | 2.753096263       | 1.454934803        |
| 247674_at           | AT5G59930 | 2.205625354                       | 1.033425642              | 0.521544477     | 0.59228612                  | 0.643725762       | 0.529560953        |
| 247675_at           | AT5G59940 | 3.920623982                       | 2.047296785              | 1.162938059     | 0.934746556                 | 1.147196088       | 0.990378654        |
| 247622_at           | AT5G60350 | 3.019347218                       | 0.609420586              | 0.642414119     | 0.864291079                 | 0.705168514       | 0.628157472        |
| 247594_at           | AT5G60800 | 4.350117688                       | 0.995529961              | 1.380132833     | 1.937329078                 | 1.66475587        | 0.712341133        |
| 247521_at           | AT5G61450 | 2.845114927                       | 1.579736553              | 1.611188276     | 1.303402349                 | 1.129179101       | 1.425089188        |
| 247531_at           | AT5G61550 | 1.760261759                       | 0.80819396               | 0.466153649     | 0.533350653                 | 0.688351666       | 0.558280903        |
| 247532_at           | AT5G61560 | 1.333664737                       | 0.559508418              | 0.768706832     | 0.768876676                 | 0.689579083       | 0.736075107        |
| 247474_at           | AT5G62280 | 3.816003134                       | 2.022069143              | 1.898485336     | 1.177326794                 | 0.872562979       | 0.619282952        |
| 247475_at           | AT5G62310 | 3.354916932                       | 0.798318015              | 0.465144378     | 0.482906666                 | 0.658883752       | 0.610167719        |
| 247411_at           | AT5G63000 | 3.923808585                       | 2.232604964              | 2.100055543     | 2.185187063                 | 2.185020507       | 2.177353461        |
| 247318_at           | AT5G63990 | 8.056810738                       | 1.743034829              | 1.191651487     | 1.180447332                 | 1.390101313       | 3.377261724        |
| 247275_at           | AT5G64370 | 9.643742068                       | 3.556620935              | 5.625628182     | 4.701536899                 | 2.989257796       | 5.045368797        |
| 247225_at           | AT5G65090 | 2.782655767                       | 0.760394107              | 0.718277235     | 0.671095776                 | 0.782610152       | 0.741485736        |
| 247229_at           | AT5G65160 | 3.284284861                       | 0.739300295              | 0.540944779     | 0.690026951                 | 0.776709466       | 0.57400348         |
| 247151_at           | AT5G65640 | 4.414793574                       | 1.321774676              | 2.516234307     | 1.1610262                   | 0.772664916       | 1.614712318        |
| 247109_at           | AT5G65870 | 5.18913642                        | 0.421336417              | 0.628542086     | 0.58535125                  | 0.524293824       | 0.466314588        |
| 247115_at           | AT5G65930 | 5.679125034                       | 3.008547687              | 2.219404515     | 1.413049335                 | 1.920488581       | 1.311892756        |
| 247112_at           | AT5G65950 | 8.672328323                       | 5.000146318              | 4.819309497     | 3.316408899                 | 4.733163287       | 3.422875872        |
| 246989_at           | AT5G67350 | 1.754818049                       | 0.951519155              | 0.825098133     | 0.832069046                 | 0.755641785       | 0.84346408         |
| 246991_at           | AT5G67400 | 12.33505964                       | 2.81227114               | 1.068518193     | 1.380762721                 | 4.361096306       | 1.42033322         |
| 246993_at           | AT5G67450 | 5.828015185                       | 2.12702889               | 0.6547113       | 0.600195636                 | 0.745514404       | 0.873286023        |

**Supplementary Tables pertaining to Figure 3**

**Supplementary Table S19. Loci enriched in individual cell types from microarray data**

**Loci enriched in Non-Hair Epidermis (WER) from micorarray expression data analysis (1.7 fold, p <0.5)**

| Affymetrix Probeset | Locus     | Mean Microarray Expression Values |                          |                 |                             |                   |                    |
|---------------------|-----------|-----------------------------------|--------------------------|-----------------|-----------------------------|-------------------|--------------------|
|                     |           | Root Hairs (COBL9)                | Non-Hair Epidermis (WER) | Cortex (CORTEX) | Endodermis/ Quiescent (SCR) | Vasculature (WOL) | Columella (PET111) |
| 261569_at           | AT1G01060 | 0.869534222                       | 3.212378395              | 1.453862761     | 1.09530978                  | 1.043739413       | 0.930046603        |
| 261578_at           | AT1G01100 | 12.1369886                        | 27.4563013               | 8.690735867     | 12.10748341                 | 14.22817033       | 8.202890902        |
| 264152_at           | AT1G02140 | 3.998272372                       | 11.93709957              | 3.710871341     | 3.779496844                 | 5.319729586       | 3.741450502        |
| 262112_at           | AT1G02870 | 0.633686437                       | 5.520193874              | 1.000884879     | 2.072572165                 | 3.075284568       | 1.207172745        |
| 263113_at           | AT1G03150 | 1.433549734                       | 3.137240529              | 1.328557044     | 1.225363873                 | 1.432278686       | 1.163720068        |
| 264826_at           | AT1G03410 | 0.541642936                       | 1.717528487              | 0.571321052     | 0.54186126                  | 0.577647389       | 0.639735171        |
| 265037_at           | AT1G03860 | 5.206445903                       | 10.00052889              | 3.216649019     | 2.456085737                 | 3.954982159       | 1.950936747        |
| 264327_at           | AT1G04170 | 6.111092812                       | 10.43115512              | 4.380809268     | 3.17410119                  | 5.855052582       | 3.229517072        |
| 264566_at           | AT1G05270 | 0.823967491                       | 1.656783641              | 0.780185996     | 0.732904791                 | 0.75579673        | 0.694972411        |
| 256065_at           | AT1G07070 | 1.563573954                       | 7.165953509              | 1.647768926     | 2.31468929                  | 3.899742758       | 1.386060056        |
| 256043_at           | AT1G07210 | 1.269274098                       | 3.07658018               | 0.924164884     | 0.856386554                 | 1.656323583       | 0.900189105        |
| 261418_at           | AT1G07830 | 1.041655527                       | 5.498144349              | 1.220352599     | 2.078650831                 | 2.674806207       | 1.174203251        |
| 261784_at           | AT1G08220 | 1.418841045                       | 3.016651901              | 1.206719528     | 1.134306655                 | 1.612608424       | 1.322802953        |
| 245227_s_at         | AT1G08410 | 0.467543786                       | 0.926252261              | 0.417307596     | 0.439666819                 | 0.450775827       | 0.487506944        |
| 264783_at           | AT1G08650 | 0.771214033                       | 2.974349936              | 0.972483892     | 0.844319124                 | 0.814527125       | 0.882227524        |
| 264254_at           | AT1G09150 | 1.721911862                       | 4.58461791               | 2.066168809     | 2.156098936                 | 2.546892281       | 2.045336406        |
| 264665_at           | AT1G09660 | 0.624121705                       | 2.495491837              | 1.162877976     | 0.772755599                 | 0.879285315       | 0.719814342        |
| 263255_at           | AT1G10490 | 0.761763598                       | 2.187635709              | 0.842204515     | 0.931964647                 | 1.216228324       | 0.988510856        |
| 260472_at           | AT1G10990 | 0.838217329                       | 1.835238007              | 0.787281438     | 0.676901846                 | 0.650781032       | 0.662432809        |
| 256070_at           | AT1G13730 | 0.98109847                        | 5.670713023              | 1.963690871     | 1.803076162                 | 3.165174286       | 1.051533111        |
| 260781_at           | AT1G14620 | 1.990052594                       | 6.231789828              | 1.69538039      | 2.318176848                 | 3.453921447       | 1.685723552        |
| 262840_at           | AT1G14900 | 1.269951327                       | 3.586714558              | 1.840646297     | 1.569272965                 | 2.08796207        | 1.660212393        |
| 260714_at           | AT1G14980 | 6.63655                           | 25.0791456               | 3.980066029     | 5.17876119                  | 9.09498757        | 3.650734569        |
| 262569_at           | AT1G15180 | 0.446526998                       | 0.900464937              | 0.346086932     | 0.340927859                 | 0.397957238       | 0.359270349        |
| 262602_at           | AT1G15270 | 1.201068818                       | 3.672137585              | 0.720084297     | 0.957835786                 | 0.893079429       | 1.211741202        |
| 259505_at           | AT1G15810 | 1.67910133                        | 3.46440623               | 1.774134049     | 1.255262317                 | 2.011389953       | 1.219364246        |
| 255902_at           | AT1G17880 | 4.510510352                       | 18.31850434              | 3.444439979     | 5.23718503                  | 7.084749394       | 3.903525512        |
| 255780_at           | AT1G18580 | 1.008299426                       | 2.039630354              | 0.968949301     | 0.775149981                 | 0.920460273       | 0.941506805        |
| 255777_at           | AT1G18630 | 1.674520308                       | 2.912957859              | 0.6198959       | 0.740201633                 | 0.883490302       | 0.691061778        |
| 261406_at           | AT1G18800 | 0.701183322                       | 3.189408729              | 0.732924307     | 0.854692282                 | 1.040932158       | 0.673287279        |

**Supplementary Tables pertaining to Figure 3**

**Supplementary Table S19. Loci enriched in individual cell types from microarray data**

**Loci enriched in Non-Hair Epidermis (WER) from micorarray expression data analysis (1.7 fold, p <0.5)**

| Affymetrix Probeset | Locus     | Mean Microarray Expression Values |                          |                 |                             |                   |                    |
|---------------------|-----------|-----------------------------------|--------------------------|-----------------|-----------------------------|-------------------|--------------------|
|                     |           | Root Hairs (COBL9)                | Non-Hair Epidermis (WER) | Cortex (CORTEX) | Endodermis/ Quiescent (SCR) | Vasculature (WOL) | Columella (PET111) |
| 260670_at           | AT1G19520 | 0.693407662                       | 2.637371051              | 0.724148356     | 0.726867401                 | 0.898358799       | 0.703700002        |
| 259515_at           | AT1G20430 | 2.417386127                       | 5.973433663              | 1.327362895     | 1.395058559                 | 1.97840881        | 1.394032757        |
| 256092_at           | AT1G20696 | 1.631080149                       | 12.38439274              | 2.434317935     | 1.757518016                 | 1.858950104       | 1.547129177        |
| 259551_at           | AT1G21190 | 0.52863986                        | 2.187766568              | 0.539712398     | 0.699970955                 | 0.902831395       | 0.608439064        |
| 264206_at           | AT1G22730 | 1.516371172                       | 2.694737345              | 1.233087378     | 0.723758047                 | 0.976820816       | 0.81569557         |
| 264203_at           | AT1G22780 | 10.26173649                       | 25.58309192              | 7.761523219     | 10.02038996                 | 14.91077856       | 5.683218533        |
| 264895_at           | AT1G23100 | 0.787947323                       | 3.842935647              | 0.628110871     | 0.86304151                  | 1.360110961       | 0.662829606        |
| 255732_at           | AT1G25450 | 1.236703459                       | 3.752342577              | 0.649770897     | 1.194509634                 | 0.916700507       | 0.620104243        |
| 261011_at           | AT1G26340 | 1.044495029                       | 2.877316046              | 0.756087778     | 0.916832368                 | 1.277822949       | 0.941313959        |
| 261019_at           | AT1G26470 | 1.175845381                       | 5.165890109              | 0.878449466     | 1.282537098                 | 2.041018668       | 1.824332055        |
| 263691_at           | AT1G26880 | 10.08767706                       | 25.71985208              | 7.625985401     | 8.369450771                 | 13.47701301       | 6.849155015        |
| 264977_at           | AT1G27090 | 1.357379301                       | 6.806886723              | 1.387581883     | 1.438072453                 | 1.883634332       | 1.075177658        |
| 264446_at           | AT1G27310 | 5.375107425                       | 11.57705229              | 2.726202673     | 2.267528613                 | 2.668973271       | 1.587577007        |
| 262292_at           | AT1G27595 | 0.673741396                       | 1.271068798              | 0.69957139      | 0.661960986                 | 0.734374419       | 0.714384388        |
| 262297_at           | AT1G27600 | 1.457157785                       | 2.923472608              | 1.326575231     | 0.774561935                 | 0.989062447       | 0.904028096        |
| 262295_at           | AT1G27650 | 0.877006171                       | 2.481393823              | 0.736742794     | 1.187014638                 | 1.29457157        | 0.746434135        |
| 245688_at           | AT1G28290 | 15.63342215                       | 44.05054263              | 10.27705368     | 3.423185797                 | 6.68429851        | 10.20229632        |
| 261439_at           | AT1G28395 | 1.21643624                        | 6.063155702              | 1.323092444     | 1.795988884                 | 2.711039094       | 1.928582756        |
| 256192_at           | AT1G30110 | 1.628377387                       | 2.878465042              | 1.239757344     | 0.655895409                 | 0.661447965       | 1.221554476        |
| 263224_at           | AT1G30580 | 5.436485321                       | 12.2599983               | 4.540303885     | 2.702324623                 | 5.664619554       | 2.874810202        |
| 265103_at           | AT1G31070 | 0.479956386                       | 1.518338204              | 0.496043921     | 0.48438334                  | 0.522100515       | 0.559567285        |
| 246575_at           | AT1G31660 | 0.801364223                       | 3.883785705              | 1.141971371     | 1.202830987                 | 2.117744562       | 1.365711929        |
| 246634_at           | AT1G31730 | 2.128659376                       | 4.212878797              | 2.242571112     | 1.601538837                 | 2.065025397       | 1.587347276        |
| 246266_at           | AT1G31817 | 1.559251893                       | 3.344900315              | 1.65464494      | 1.265750371                 | 1.860016833       | 1.121803426        |
| 255751_at           | AT1G31950 | 1.351196296                       | 6.825177784              | 3.500261546     | 0.822523685                 | 0.989691043       | 0.963566385        |
| 245758_at           | AT1G32240 | 0.430838369                       | 1.028306364              | 0.438300264     | 0.514349082                 | 0.548802845       | 0.536769908        |
| 256466_at           | AT1G32580 | 0.83114427                        | 2.619170117              | 0.811306846     | 0.930982525                 | 1.526474364       | 1.076071865        |
| 256423_at           | AT1G33540 | 0.52746954                        | 1.258322779              | 0.444143329     | 0.401912153                 | 0.457172173       | 0.431877683        |
| 261988_at           | AT1G33680 | 0.520596726                       | 1.458180305              | 0.517114184     | 0.627943147                 | 0.622915687       | 0.554587826        |
| 261993_at           | AT1G33860 | 1.497562945                       | 3.686858117              | 1.15159249      | 0.829067357                 | 0.944605895       | 0.594579449        |
| 260507_at           | AT1G47200 | 3.018119651                       | 7.118111076              | 1.723378611     | 1.576660476                 | 2.622201015       | 1.481343067        |

**Supplementary Tables pertaining to Figure 3**

**Supplementary Table S19. Loci enriched in individual cell types from microarray data**

**Loci enriched in Non-Hair Epidermis (WER) from micorarray expression data analysis (1.7 fold, p <0.5)**

| Affymetrix Probeset | Locus     | Mean Microarray Expression Values |                          |                 |                             |                   |                    |
|---------------------|-----------|-----------------------------------|--------------------------|-----------------|-----------------------------|-------------------|--------------------|
|                     |           | Root Hairs (COBL9)                | Non-Hair Epidermis (WER) | Cortex (CORTEX) | Endodermis/ Quiescent (SCR) | Vasculature (WOL) | Columella (PET111) |
| 260506_at           | AT1G47210 | 0.759124972                       | 2.457490137              | 1.20480483      | 0.846839327                 | 1.165693372       | 1.009872574        |
| 260725_at           | AT1G48170 | 0.991604173                       | 2.134319452              | 0.871865658     | 0.780690294                 | 1.096543659       | 0.806063499        |
| 260768_at           | AT1G49245 | 0.380818355                       | 0.891122725              | 0.348129588     | 0.441053308                 | 0.479189254       | 0.454777316        |
| 262415_at           | AT1G49400 | 0.938037642                       | 3.066327713              | 1.077707208     | 0.866169337                 | 1.45264012        | 0.849735515        |
| 262402_at           | AT1G49410 | 4.823765594                       | 14.39366019              | 2.928679352     | 2.854520704                 | 6.16746751        | 2.572089042        |
| 261603_at           | AT1G49600 | 4.588139295                       | 12.9943809               | 3.374886114     | 2.527895203                 | 4.625820038       | 2.110361379        |
| 264239_at           | AT1G54770 | 1.055947271                       | 3.079389788              | 1.163680706     | 1.093479847                 | 1.556054298       | 1.112162001        |
| 259653_at           | AT1G55240 | 0.929572602                       | 1.756400341              | 0.535713729     | 0.603268737                 | 0.699115694       | 0.807854996        |
| 260596_at           | AT1G55900 | 0.90488254                        | 4.935977766              | 1.145500533     | 1.35422269                  | 2.690067747       | 1.595426323        |
| 246378_at           | AT1G57620 | 2.997821999                       | 5.560881707              | 2.260881496     | 1.078528064                 | 1.968873809       | 2.158426998        |
| 264913_at           | AT1G60770 | 0.984310168                       | 3.715587296              | 0.910987189     | 1.023872535                 | 1.992262838       | 0.952588635        |
| 260323_at           | AT1G63780 | 0.80491273                        | 5.296134651              | 1.178407027     | 1.850582464                 | 3.01791542        | 1.355086713        |
| 262336_at           | AT1G64220 | 0.311953798                       | 1.189923878              | 0.344208978     | 0.400568974                 | 0.545731983       | 0.382465553        |
| 261975_at           | AT1G64640 | 1.452077082                       | 5.145516421              | 2.249326205     | 0.966012857                 | 1.669330542       | 0.856200006        |
| 262875_at           | AT1G64970 | 0.652357949                       | 1.681703022              | 0.853980494     | 0.69837339                  | 0.814295781       | 0.88463323         |
| 262925_at           | AT1G65730 | 1.503352073                       | 4.634132366              | 1.270049517     | 0.940713188                 | 1.156193506       | 1.760544602        |
| 256368_at           | AT1G66800 | 1.573642053                       | 4.668256467              | 1.407603859     | 0.984817904                 | 1.657658167       | 1.053319414        |
| 260200_at           | AT1G67620 | 1.372272113                       | 2.361260471              | 0.968897441     | 0.99066425                  | 1.343734127       | 1.280826474        |
| 259996_at           | AT1G67910 | 0.852720031                       | 1.772583154              | 0.772044062     | 0.792779194                 | 0.812882946       | 0.679021363        |
| 262230_at           | AT1G68560 | 1.083610094                       | 8.356626912              | 3.500062773     | 1.260908582                 | 1.885136357       | 1.873630201        |
| 260338_at           | AT1G69250 | 1.742739736                       | 5.215727027              | 1.192626143     | 1.296187568                 | 2.356789487       | 1.495159678        |
| 260368_at           | AT1G69700 | 0.729677751                       | 3.209655289              | 1.287547931     | 1.062087944                 | 1.388411898       | 0.867996415        |
| 264702_at           | AT1G70190 | 0.739737901                       | 3.303000341              | 0.75827552      | 0.621033329                 | 0.870659702       | 0.655652956        |
| 264337_at           | AT1G70350 | 1.205752947                       | 2.732540976              | 0.964650283     | 1.033980277                 | 1.40812828        | 0.886135105        |
| 259749_at           | AT1G71100 | 0.591722868                       | 1.413506702              | 0.654288966     | 0.713425136                 | 0.830346373       | 0.77264333         |
| 261508_at           | AT1G71730 | 1.516025576                       | 3.091933003              | 1.184815302     | 1.720971461                 | 1.733418759       | 1.422485936        |
| 260095_at           | AT1G73230 | 5.583203372                       | 21.35993688              | 4.714048903     | 6.873709059                 | 9.65027657        | 4.364372384        |
| 260258_at           | AT1G74270 | 9.630609574                       | 18.62151207              | 5.61384792      | 6.099909952                 | 9.415603089       | 5.246464837        |
| 260230_at           | AT1G74500 | 1.348646693                       | 12.23683021              | 5.478792971     | 1.415534103                 | 1.04609112        | 6.777976588        |
| 260235_at           | AT1G74560 | 0.641099563                       | 6.146843421              | 1.14100053      | 1.297860102                 | 1.957214967       | 1.359953073        |
| 262685_at           | AT1G76010 | 4.684224686                       | 15.80757832              | 6.409728257     | 4.160077881                 | 7.702553259       | 2.497189132        |



**Supplementary Tables pertaining to Figure 3**

**Supplementary Table S19. Loci enriched in individual cell types from microarray data**

**Loci enriched in Non-Hair Epidermis (WER) from micorarray expression data analysis (1.7 fold, p <0.5)**

| Affymetrix Probeset | Locus     | Mean Microarray Expression Values |                          |                 |                             |                   |                    |
|---------------------|-----------|-----------------------------------|--------------------------|-----------------|-----------------------------|-------------------|--------------------|
|                     |           | Root Hairs (COBL9)                | Non-Hair Epidermis (WER) | Cortex (CORTEX) | Endodermis/ Quiescent (SCR) | Vasculature (WOL) | Columella (PET111) |
| 264948_at           | AT1G77050 | 0.652136356                       | 1.430745896              | 0.566893178     | 0.59979177                  | 0.741346538       | 0.733485947        |
| 259678_at           | AT1G77750 | 3.166462972                       | 6.040524297              | 1.881168352     | 1.448546941                 | 3.034777559       | 1.374095499        |
| 264101_at           | AT1G79000 | 0.765663942                       | 1.867593156              | 0.84235501      | 0.733157808                 | 0.692521515       | 0.731019424        |
| 264118_at           | AT1G79140 | 0.413288073                       | 2.73978851               | 0.602174649     | 1.046910815                 | 1.41422071        | 0.76203705         |
| 261352_at           | AT1G79650 | 0.979042791                       | 3.161229004              | 1.191026609     | 1.026187591                 | 1.688789914       | 0.934781042        |
| 260166_at           | AT1G79840 | 0.70056256                        | 2.119976831              | 0.550112074     | 0.528000581                 | 0.650687481       | 0.520016333        |
| 260282_at           | AT1G80410 | 0.631081503                       | 3.49940718               | 0.716960185     | 0.713773001                 | 1.174105467       | 0.729439988        |
| 263406_at           | AT2G04160 | 4.502941461                       | 11.66120089              | 1.495552623     | 0.630092475                 | 0.956066727       | 1.986460198        |
| 263810_at           | AT2G04520 | 2.837539564                       | 9.483228243              | 3.221621951     | 3.295255064                 | 3.374487731       | 1.961764685        |
| 265776_at           | AT2G07340 | 0.715773163                       | 2.107042992              | 0.654958077     | 0.817358371                 | 0.897534367       | 0.638682464        |
| 265779_at           | AT2G07360 | 0.622366133                       | 1.649341405              | 0.598353283     | 0.561229455                 | 0.710076885       | 0.616919967        |
| 263636_at           | AT2G11910 | 2.031521639                       | 9.047618589              | 2.882039965     | 3.595667233                 | 4.855834066       | 1.825591033        |
| 265831_at           | AT2G14460 | 0.461297954                       | 2.723606667              | 0.540518577     | 0.876026165                 | 1.562436381       | 0.662413209        |
| 265895_at           | AT2G15000 | 4.210258345                       | 7.670965494              | 2.239305598     | 2.281300531                 | 4.189882516       | 1.177336874        |
| 263610_at           | AT2G16230 | 0.757488936                       | 2.185896299              | 1.230945773     | 0.702221095                 | 0.882388664       | 1.051665061        |
| 265352_at           | AT2G16600 | 10.11693485                       | 21.33543107              | 8.008912482     | 7.929172857                 | 8.289549104       | 7.065591065        |
| 265930_at           | AT2G18510 | 0.882144407                       | 2.424614718              | 0.985233495     | 0.744484962                 | 1.067489907       | 0.846776327        |
| 266074_at           | AT2G18740 | 0.523170038                       | 2.630395093              | 0.50262186      | 0.681155438                 | 0.93807139        | 0.651493606        |
| 266705_at           | AT2G19750 | 0.973374948                       | 13.41266731              | 1.003799264     | 2.438025405                 | 5.225777764       | 1.986302102        |
| 263371_at           | AT2G20490 | 0.632891799                       | 10.80508987              | 0.976622527     | 1.96307665                  | 3.752994038       | 1.239093583        |
| 265443_at           | AT2G20750 | 1.674704589                       | 10.32175782              | 2.298517432     | 0.839148255                 | 2.44519096        | 0.936609896        |
| 263432_at           | AT2G22230 | 1.445485906                       | 6.921100008              | 3.798675318     | 1.769875395                 | 2.174416125       | 1.243451995        |
| 264043_at           | AT2G22490 | 1.1263902                         | 2.806520536              | 1.147612798     | 1.355655328                 | 1.131397657       | 0.932322096        |
| 267287_at           | AT2G23630 | 1.00664006                        | 8.522893654              | 0.796189621     | 0.798699016                 | 0.700611917       | 4.677324322        |
| 266656_at           | AT2G25900 | 0.988001557                       | 2.56488293               | 1.481270733     | 1.162800033                 | 1.378294913       | 1.111857494        |
| 266262_at           | AT2G27590 | 1.415866557                       | 3.450645123              | 2.002313505     | 1.926814448                 | 1.365193461       | 1.888683301        |
| 266256_at           | AT2G27710 | 16.21636799                       | 33.03353723              | 11.72873769     | 12.97699183                 | 16.63572116       | 8.319943829        |
| 266264_at           | AT2G27775 | 1.102823774                       | 3.321821006              | 0.875545737     | 0.884344509                 | 1.484169097       | 0.833921789        |
| 266253_at           | AT2G27840 | 1.090814508                       | 6.538319971              | 1.280570211     | 1.508084611                 | 3.059966806       | 1.327778873        |
| 265254_at           | AT2G28380 | 0.744628362                       | 2.255601456              | 1.066445508     | 1.093757322                 | 1.221188964       | 1.320359691        |
| 255865_at           | AT2G30330 | 0.930685272                       | 1.614648296              | 0.638256109     | 0.652210987                 | 0.731688434       | 0.748818065        |

**Supplementary Tables pertaining to Figure 3**

**Supplementary Table S19. Loci enriched in individual cell types from microarray data**

**Loci enriched in Non-Hair Epidermis (WER) from micorarray expression data analysis (1.7 fold, p <0.5)**

| Affymetrix Probeset | Locus     | Mean Microarray Expression Values |                          |                 |                             |                   |                    |
|---------------------|-----------|-----------------------------------|--------------------------|-----------------|-----------------------------|-------------------|--------------------|
|                     |           | Root Hairs (COBL9)                | Non-Hair Epidermis (WER) | Cortex (CORTEX) | Endodermis/ Quiescent (SCR) | Vasculature (WOL) | Columella (PET111) |
| 267516_at           | AT2G30520 | 0.57700281                        | 2.79609946               | 1.17886754      | 0.716681077                 | 0.825816218       | 0.673668458        |
| 266471_at           | AT2G31060 | 2.020675511                       | 5.095542997              | 1.328566212     | 1.09721047                  | 2.316510297       | 1.30078599         |
| 263251_at           | AT2G31410 | 0.720500253                       | 5.533402166              | 0.739042586     | 1.275839674                 | 2.03395488        | 0.894968649        |
| 265730_at           | AT2G32220 | 0.878063743                       | 2.896652394              | 0.74074513      | 0.919514365                 | 1.700407507       | 1.359888272        |
| 267062_at           | AT2G32600 | 1.234159576                       | 2.38281844               | 1.089518725     | 1.116224288                 | 1.309506115       | 1.073070302        |
| 245164_at           | AT2G33210 | 5.316966265                       | 13.67060198              | 4.687820663     | 4.383625097                 | 7.180914758       | 2.505737009        |
| 267457_at           | AT2G33790 | 3.530782803                       | 27.35794748              | 4.669588782     | 0.82106322                  | 2.786333785       | 3.356531609        |
| 256723_at           | AT2G34160 | 1.090626524                       | 2.438895962              | 0.875312968     | 1.05528421                  | 1.251572261       | 0.781962288        |
| 263939_at           | AT2G36070 | 0.874768519                       | 2.577040263              | 0.958383678     | 1.036648591                 | 1.464444557       | 1.012456231        |
| 263289_at           | AT2G36170 | 8.562294214                       | 21.71698756              | 3.578062031     | 4.909181642                 | 10.31568628       | 4.611468573        |
| 267174_at           | AT2G37600 | 0.561113027                       | 3.394188788              | 0.548222055     | 0.881431644                 | 1.186326894       | 0.796957188        |
| 263263_at           | AT2G38840 | 0.705714098                       | 1.368767534              | 0.601847847     | 0.58447835                  | 0.660971878       | 0.639187497        |
| 267019_at           | AT2G39130 | 1.325423543                       | 4.579357337              | 1.666726309     | 0.649124647                 | 0.799265383       | 0.77133812         |
| 266981_at           | AT2G39460 | 9.512284456                       | 28.42499154              | 6.505540512     | 7.543636634                 | 12.17234666       | 6.049975917        |
| 266372_at           | AT2G41310 | 0.555398498                       | 1.511046714              | 0.713046184     | 0.453980869                 | 0.508069867       | 0.562078193        |
| 265883_at           | AT2G42310 | 4.022029155                       | 11.22925454              | 2.832831621     | 2.089014258                 | 2.401600203       | 2.685739631        |
| 263975_at           | AT2G42710 | 0.864024326                       | 3.757462803              | 1.21140051      | 1.296065954                 | 2.092646578       | 1.078281856        |
| 266451_at           | AT2G43090 | 6.779678999                       | 11.72052244              | 4.445928605     | 3.342258076                 | 4.813370509       | 4.422794246        |
| 266447_at           | AT2G43290 | 1.514282154                       | 5.552332167              | 0.701320841     | 1.917826772                 | 0.922472015       | 2.606433454        |
| 260558_at           | AT2G43600 | 1.115921062                       | 7.674446753              | 0.907823625     | 0.675213766                 | 0.781943082       | 2.66440515         |
| 260557_at           | AT2G43610 | 11.11780095                       | 41.29720731              | 4.841927371     | 1.231431709                 | 2.122209394       | 18.29364814        |
| 260585_at           | AT2G43650 | 0.369470362                       | 1.453752588              | 0.407751076     | 0.633076636                 | 0.797714391       | 0.501372355        |
| 267188_at           | AT2G44050 | 3.769766683                       | 6.517577305              | 3.425432465     | 2.02931228                  | 3.047073198       | 1.624191742        |
| 267211_at           | AT2G44065 | 2.813131714                       | 5.275795931              | 1.625409451     | 1.839012112                 | 2.06567437        | 1.508962295        |
| 267213_at           | AT2G44120 | 4.035776236                       | 28.04889734              | 5.725164226     | 7.065256953                 | 15.013255         | 4.001556647        |
| 266822_at           | AT2G44860 | 0.681970335                       | 7.57509471               | 1.251693621     | 2.482500847                 | 3.530147764       | 1.167876434        |
| 266125_at           | AT2G45050 | 0.63000691                        | 4.430192774              | 0.992261749     | 0.658199096                 | 0.842747149       | 0.89490052         |
| 266136_at           | AT2G45060 | 1.655343824                       | 3.276223229              | 1.180134979     | 0.770672224                 | 0.913829681       | 0.766583916        |
| 266124_at           | AT2G45080 | 0.733970737                       | 2.36886722               | 0.801492778     | 0.7684579                   | 0.871272966       | 1.284061458        |
| 267507_at           | AT2G45710 | 1.931070721                       | 6.399602438              | 1.242807859     | 1.607718809                 | 2.684803286       | 1.488776815        |
| 266596_at           | AT2G46150 | 0.644238082                       | 2.955762447              | 0.729813818     | 0.58157372                  | 0.521256103       | 0.61546721         |

**Supplementary Tables pertaining to Figure 3**

**Supplementary Table S19. Loci enriched in individual cell types from microarray data**

**Loci enriched in Non-Hair Epidermis (WER) from micorarray expression data analysis (1.7 fold, p <0.5)**

| Affymetrix Probeset | Locus     | Mean Microarray Expression Values |                          |                 |                             |                   |                    |
|---------------------|-----------|-----------------------------------|--------------------------|-----------------|-----------------------------|-------------------|--------------------|
|                     |           | Root Hairs (COBL9)                | Non-Hair Epidermis (WER) | Cortex (CORTEX) | Endodermis/ Quiescent (SCR) | Vasculature (WOL) | Columella (PET111) |
| 245124_at           | AT2G47580 | 2.378354813                       | 4.578216033              | 2.061863721     | 2.090587093                 | 2.450796413       | 1.853533062        |
| 259319_at           | AT3G01090 | 2.290495422                       | 4.214617638              | 1.797084779     | 1.162418783                 | 1.462235631       | 1.446042078        |
| 258958_at           | AT3G01390 | 2.887974262                       | 6.336199139              | 1.743234863     | 1.506270161                 | 1.398802417       | 1.827301558        |
| 258995_at           | AT3G01790 | 2.276638836                       | 9.431055289              | 2.390776088     | 3.018509248                 | 4.600265956       | 2.518130194        |
| 258859_at           | AT3G02120 | 0.396471238                       | 1.954665305              | 0.585712826     | 0.919387583                 | 0.94135666        | 0.796527532        |
| 259123_at           | AT3G02200 | 2.344501713                       | 7.219112633              | 1.989853169     | 2.311868052                 | 3.576108117       | 1.838324775        |
| 258576_at           | AT3G04230 | 1.087416842                       | 6.720140684              | 1.015488334     | 1.689667038                 | 3.647575692       | 0.972582539        |
| 258820_at           | AT3G04600 | 1.454595479                       | 3.451920701              | 1.462681207     | 1.243465968                 | 1.69048373        | 1.734202719        |
| 259090_at           | AT3G04920 | 3.301130984                       | 17.98301336              | 2.19394498      | 3.805956618                 | 5.609135895       | 2.232333869        |
| 259095_at           | AT3G05020 | 1.937516231                       | 8.981131903              | 3.286572573     | 2.391568559                 | 1.931099486       | 1.275900813        |
| 258747_at           | AT3G05810 | 1.112767286                       | 2.725437853              | 0.784696085     | 0.925940783                 | 1.317561949       | 0.757105175        |
| 258466_at           | AT3G06040 | 1.619586227                       | 6.932565607              | 1.072704744     | 0.990870205                 | 1.883828962       | 1.096888129        |
| 258521_at           | AT3G06680 | 1.410182683                       | 8.772981306              | 1.499132413     | 2.634513695                 | 3.486777203       | 1.838171713        |
| 258532_at           | AT3G06700 | 8.820631106                       | 19.03748844              | 4.64528159      | 5.738279119                 | 10.00820173       | 4.477271386        |
| 258545_at           | AT3G07050 | 0.550061825                       | 5.204706166              | 0.758591964     | 1.093557061                 | 1.670440435       | 0.877402975        |
| 258821_at           | AT3G07230 | 4.743372374                       | 13.21437419              | 3.475488365     | 3.676275422                 | 4.749854294       | 5.352110396        |
| 259245_at           | AT3G07660 | 0.864316409                       | 3.366574002              | 0.902166929     | 0.8255089                   | 1.266553185       | 0.958481153        |
| 259248_at           | AT3G07770 | 0.829189131                       | 6.658304666              | 1.819526091     | 2.588503266                 | 3.8890598         | 2.275803971        |
| 258644_at           | AT3G07810 | 2.775654285                       | 5.473596694              | 2.831517273     | 1.530569526                 | 2.005398977       | 1.558005551        |
| 258638_at           | AT3G07950 | 3.012194099                       | 8.465972643              | 3.126331267     | 1.233849961                 | 1.933120855       | 1.549313076        |
| 258657_at           | AT3G09890 | 1.179553938                       | 3.137874665              | 1.086939406     | 0.993000304                 | 1.347563157       | 0.914666787        |
| 259239_at           | AT3G11510 | 12.75155479                       | 33.91867988              | 8.095765244     | 8.496001174                 | 17.9431143        | 8.421078171        |
| 259237_at           | AT3G11630 | 1.925729979                       | 8.685192505              | 5.00895486      | 3.198003706                 | 4.98948658        | 2.835116242        |
| 257658_at           | AT3G13230 | 0.733194667                       | 7.289035414              | 1.376395393     | 2.088145318                 | 3.624010127       | 1.850116962        |
| 256982_at           | AT3G13460 | 2.139812098                       | 7.114527803              | 2.116267303     | 2.770437037                 | 2.997625791       | 1.33916955         |
| 256784_at           | AT3G13674 | 0.805164551                       | 2.233421797              | 0.829779782     | 0.73090117                  | 1.206711657       | 0.676286318        |
| 257002_at           | AT3G14100 | 1.729051533                       | 4.037481985              | 2.187242259     | 1.579305211                 | 2.114193698       | 2.048581238        |
| 257079_at           | AT3G15230 | 0.396721849                       | 1.630648                 | 0.459399333     | 0.563872165                 | 0.60499603        | 0.443469128        |
| 258397_at           | AT3G15357 | 0.451911277                       | 5.295032909              | 0.491756079     | 0.677144728                 | 0.948346859       | 0.5379979          |
| 258338_at           | AT3G16150 | 1.417985085                       | 5.528199334              | 1.058288715     | 1.168280491                 | 1.055478053       | 1.528900242        |
| 257755_at           | AT3G18760 | 3.362518502                       | 6.654465626              | 1.79127541      | 2.260991363                 | 3.318731888       | 1.751075972        |

**Supplementary Tables pertaining to Figure 3**

**Supplementary Table S19. Loci enriched in individual cell types from microarray data**

**Loci enriched in Non-Hair Epidermis (WER) from micorarray expression data analysis (1.7 fold, p <0.5)**

| Affymetrix Probeset | Locus     | Mean Microarray Expression Values |                          |                 |                             |                   |                    |
|---------------------|-----------|-----------------------------------|--------------------------|-----------------|-----------------------------|-------------------|--------------------|
|                     |           | Root Hairs (COBL9)                | Non-Hair Epidermis (WER) | Cortex (CORTEX) | Endodermis/ Quiescent (SCR) | Vasculature (WOL) | Columella (PET111) |
| 257085_at           | AT3G20630 | 0.477140824                       | 1.971435271              | 0.477535586     | 0.481969769                 | 0.531384566       | 0.482252179        |
| 256812_at           | AT3G21350 | 0.74480546                        | 1.798882194              | 0.762089886     | 0.637747218                 | 0.782330382       | 0.759137676        |
| 256794_at           | AT3G22230 | 4.094477208                       | 16.18533225              | 2.562412032     | 4.895706483                 | 7.456541442       | 3.991464337        |
| 258454_at           | AT3G22300 | 1.95827138                        | 5.135707079              | 1.76013157      | 1.59402893                  | 2.27719512        | 1.418610095        |
| 258296_at           | AT3G23390 | 12.56991859                       | 25.55687135              | 6.373718587     | 9.312226324                 | 14.62974738       | 7.735117182        |
| 256890_at           | AT3G23830 | 0.526817023                       | 14.75335124              | 2.733484083     | 6.59708383                  | 8.106110502       | 1.763560286        |
| 256916_at           | AT3G24050 | 1.203306082                       | 2.926392339              | 1.206216798     | 1.381664828                 | 1.420340105       | 1.583508738        |
| 257239_at           | AT3G24100 | 1.144194253                       | 2.910446996              | 1.224981025     | 1.474192249                 | 1.092012678       | 1.431015785        |
| 257906_at           | AT3G25520 | 14.30362529                       | 29.42750176              | 10.8065429      | 11.4076271                  | 16.88491253       | 7.282712187        |
| 257709_at           | AT3G27325 | 0.671418054                       | 1.382220265              | 0.675417727     | 0.539685631                 | 0.695065187       | 0.717094799        |
| 257141_at           | AT3G28900 | 3.185160833                       | 15.57682237              | 2.170838739     | 3.990566219                 | 6.972557779       | 1.824749616        |
| 258001_at           | AT3G28950 | 1.139784632                       | 2.246022613              | 0.965644057     | 0.927683112                 | 1.027180329       | 0.877241586        |
| 252711_at           | AT3G43720 | 0.759199144                       | 2.876758685              | 0.602928727     | 1.410705833                 | 0.724279384       | 0.650610827        |
| 252643_at           | AT3G44590 | 4.847875096                       | 19.8328446               | 5.102133016     | 6.779093237                 | 11.15729517       | 3.179618298        |
| 252492_at           | AT3G46740 | 1.671560835                       | 5.075509465              | 2.2650525       | 1.810540588                 | 2.380126328       | 1.37448977         |
| 252288_at           | AT3G49080 | 0.759313224                       | 2.467911882              | 0.679713891     | 0.758510511                 | 1.00905846        | 0.730522381        |
| 252295_at           | AT3G49100 | 2.126358015                       | 3.858771988              | 1.191154461     | 0.970162514                 | 1.480259625       | 0.844053327        |
| 252256_at           | AT3G49430 | 1.444480468                       | 4.805054193              | 1.39620948      | 1.987549444                 | 2.42826607        | 1.508380766        |
| 252235_at           | AT3G49910 | 19.64267203                       | 42.34712122              | 14.01935931     | 20.23429713                 | 23.55293814       | 11.83006271        |
| 252115_at           | AT3G51600 | 0.622797345                       | 2.35819337               | 0.625530024     | 0.687167687                 | 0.638414654       | 0.615080555        |
| 252034_at           | AT3G52040 | 0.697776654                       | 4.813211498              | 0.854618737     | 1.364892383                 | 1.796523274       | 1.293407671        |
| 252041_at           | AT3G52090 | 3.681095226                       | 6.553450292              | 2.770752237     | 3.162936347                 | 3.039695637       | 3.372269346        |
| 252031_at           | AT3G52140 | 0.942331495                       | 4.830782945              | 1.165037147     | 1.379547887                 | 2.650625645       | 1.245040361        |
| 252055_at           | AT3G52580 | 5.612070153                       | 20.03792306              | 3.863651558     | 5.7115349                   | 9.640775375       | 4.536623501        |
| 251997_at           | AT3G53020 | 16.23005714                       | 33.65030367              | 10.29032509     | 12.23582635                 | 16.95047502       | 8.638567535        |
| 251938_at           | AT3G53430 | 16.18203296                       | 35.61462681              | 12.30807521     | 15.00948713                 | 20.18923067       | 9.19847477         |
| 251952_at           | AT3G53650 | 1.139443567                       | 1.983064765              | 0.759561414     | 0.926182838                 | 0.665421493       | 0.509295482        |
| 251953_at           | AT3G53670 | 0.767768965                       | 1.46810307               | 0.606019516     | 0.492059032                 | 0.539778949       | 0.626103407        |
| 251921_at           | AT3G53890 | 10.46911791                       | 26.65868865              | 5.78264332      | 8.569796881                 | 15.05753721       | 8.133475179        |
| 251861_at           | AT3G54810 | 2.346988421                       | 6.417661439              | 2.259748866     | 1.355172658                 | 1.728242714       | 2.339197861        |
| 251783_at           | AT3G55280 | 4.591013453                       | 21.87276269              | 4.752733585     | 4.995934731                 | 9.256401903       | 3.754804711        |

**Supplementary Tables pertaining to Figure 3**

**Supplementary Table S19. Loci enriched in individual cell types from microarray data**

**Loci enriched in Non-Hair Epidermis (WER) from micorarray expression data analysis (1.7 fold, p <0.5)**

| Affymetrix Probeset | Locus     | Mean Microarray Expression Values |                          |                 |                             |                   |                    |
|---------------------|-----------|-----------------------------------|--------------------------|-----------------|-----------------------------|-------------------|--------------------|
|                     |           | Root Hairs (COBL9)                | Non-Hair Epidermis (WER) | Cortex (CORTEX) | Endodermis/ Quiescent (SCR) | Vasculature (WOL) | Columella (PET111) |
| 251740_at           | AT3G56070 | 0.845100053                       | 8.79233008               | 1.571068531     | 3.13241837                  | 4.534213987       | 1.407097745        |
| 251486_at           | AT3G59540 | 10.14497603                       | 20.32539678              | 6.439629258     | 7.667811348                 | 11.52812082       | 6.455075751        |
| 251483_at           | AT3G59650 | 1.19210172                        | 3.583565055              | 1.13540318      | 1.456699228                 | 2.069245832       | 0.961773298        |
| 251412_at           | AT3G60220 | 0.608837881                       | 1.483498511              | 0.459074147     | 0.487774671                 | 0.621801567       | 0.696964049        |
| 251410_at           | AT3G60280 | 0.574252202                       | 1.081741435              | 0.474943543     | 0.572191971                 | 0.620715207       | 0.522287382        |
| 251357_at           | AT3G61110 | 6.893072849                       | 30.305314                | 4.096265458     | 5.515248475                 | 11.45360486       | 4.852245701        |
| 251362_at           | AT3G61240 | 1.639335632                       | 4.473105741              | 2.616455511     | 2.290932112                 | 2.469158554       | 2.009995451        |
| 251319_at           | AT3G61610 | 0.591453371                       | 1.532899522              | 0.804831484     | 0.584418818                 | 0.782835157       | 0.695868758        |
| 251231_at           | AT3G62760 | 0.688822168                       | 1.393050978              | 0.698666891     | 0.696092585                 | 0.756908558       | 0.751267758        |
| 251179_at           | AT3G63460 | 3.176059733                       | 8.307726754              | 2.176063909     | 1.52272438                  | 1.921616034       | 1.781547018        |
| 255636_at           | AT4G00730 | 1.034013282                       | 3.942873958              | 0.785477405     | 0.67965068                  | 0.745453299       | 1.031988252        |
| 255657_at           | AT4G00810 | 10.38513601                       | 17.96679251              | 7.556119785     | 7.060625951                 | 10.27296069       | 5.831791817        |
| 255642_at           | AT4G00820 | 0.777038432                       | 3.365283713              | 1.054517135     | 0.797173552                 | 1.362351597       | 1.557414707        |
| 255570_at           | AT4G01100 | 4.094904677                       | 11.76954988              | 4.692947173     | 2.091653357                 | 3.625384338       | 1.969701828        |
| 255308_at           | AT4G04910 | 3.548719857                       | 8.252674716              | 4.791198672     | 2.361902805                 | 3.980998021       | 2.461112389        |
| 254980_at           | AT4G10450 | 1.425506906                       | 13.8669588               | 3.431271464     | 4.256681011                 | 5.690286104       | 2.280173593        |
| 254962_at           | AT4G11050 | 0.695965153                       | 2.901837795              | 0.614693202     | 0.525925373                 | 0.623737573       | 0.60003089         |
| 254815_at           | AT4G12420 | 2.175556691                       | 7.375833475              | 3.842734918     | 2.74959743                  | 3.244452504       | 2.321782934        |
| 254831_at           | AT4G12600 | 1.037084129                       | 19.15366655              | 2.747852731     | 6.971366739                 | 10.79598406       | 3.048195522        |
| 254798_at           | AT4G13050 | 1.916690587                       | 3.330823009              | 1.855894372     | 1.324600656                 | 1.409509203       | 1.377722194        |
| 254686_at           | AT4G13720 | 2.650830199                       | 5.66470939               | 2.270550299     | 1.874578414                 | 2.802064111       | 1.48164627         |
| 254684_at           | AT4G13850 | 4.973025975                       | 25.18495981              | 5.171149037     | 7.305625264                 | 10.11298508       | 3.584165164        |
| 245311_at           | AT4G14320 | 9.029624089                       | 27.32551851              | 5.352420306     | 6.526166937                 | 11.92564121       | 5.085220585        |
| 245594_at           | AT4G14570 | 0.824117985                       | 2.16740786               | 0.936484241     | 0.747855674                 | 0.741287741       | 0.729027141        |
| 245557_at           | AT4G15410 | 1.588324743                       | 4.349757786              | 1.545057026     | 1.123090274                 | 1.765705439       | 1.757364453        |
| 245358_at           | AT4G15900 | 1.316882362                       | 3.29459167               | 1.40281183      | 1.544767319                 | 1.727333469       | 1.548603231        |
| 245216_at           | AT4G16143 | 1.061755311                       | 3.784462                 | 1.286889847     | 1.060711203                 | 1.189030226       | 1.007813195        |
| 254357_at           | AT4G22220 | 2.868958037                       | 6.630571399              | 2.310657659     | 1.738508166                 | 1.991786034       | 2.154639105        |
| 254355_at           | AT4G22380 | 0.418382977                       | 3.111473687              | 0.806126783     | 1.015278548                 | 1.646629061       | 1.0433727          |
| 254219_at           | AT4G23760 | 0.629242231                       | 1.129234413              | 0.555423407     | 0.612568427                 | 0.639069255       | 0.597607954        |
| 254169_at           | AT4G24290 | 0.74393013                        | 1.675845274              | 0.901259463     | 0.725226759                 | 0.737618528       | 0.870037958        |

**Supplementary Tables pertaining to Figure 3**

**Supplementary Table S19. Loci enriched in individual cell types from microarray data**

**Loci enriched in Non-Hair Epidermis (WER) from micorarray expression data analysis (1.7 fold, p <0.5)**

| Affymetrix Probeset | Locus     | Mean Microarray Expression Values |                          |                 |                             |                   |                    |
|---------------------|-----------|-----------------------------------|--------------------------|-----------------|-----------------------------|-------------------|--------------------|
|                     |           | Root Hairs (COBL9)                | Non-Hair Epidermis (WER) | Cortex (CORTEX) | Endodermis/ Quiescent (SCR) | Vasculature (WOL) | Columella (PET111) |
| 254162_at           | AT4G24440 | 1.043299194                       | 2.589323932              | 0.968755338     | 1.031726939                 | 1.174683374       | 1.361871206        |
| 254089_at           | AT4G24800 | 1.467552078                       | 3.896933611              | 1.307014663     | 1.342768333                 | 1.969694593       | 1.333053461        |
| 254056_at           | AT4G25250 | 3.147248847                       | 13.64586101              | 1.51694166      | 0.668783588                 | 1.284814207       | 1.08302161         |
| 253917_at           | AT4G27380 | 0.783729983                       | 2.658024675              | 0.744668584     | 0.936104342                 | 1.492036774       | 0.774021045        |
| 253881_at           | AT4G27640 | 0.671180334                       | 2.281560318              | 0.639567094     | 0.667850558                 | 0.799559821       | 0.781503741        |
| 253726_at           | AT4G29430 | 1.259873413                       | 2.543525619              | 1.064395573     | 1.027392234                 | 1.288269062       | 0.731413843        |
| 253607_at           | AT4G30330 | 0.548454058                       | 2.105613415              | 0.658403084     | 0.846612722                 | 1.019284879       | 0.558367204        |
| 253605_at           | AT4G30990 | 0.495386547                       | 1.117928758              | 0.4615487       | 0.472466822                 | 0.545275782       | 0.506883401        |
| 253577_at           | AT4G31080 | 0.996974677                       | 2.159382741              | 0.865519843     | 0.698548786                 | 0.836179034       | 0.865196019        |
| 253545_at           | AT4G31310 | 0.7670089                         | 2.042380758              | 0.705674454     | 0.757450842                 | 0.674585571       | 0.699061624        |
| 253538_at           | AT4G31460 | 2.036673931                       | 4.404547547              | 1.60511509      | 1.910707493                 | 2.468375996       | 1.297985488        |
| 253536_at           | AT4G31580 | 2.723096744                       | 9.000884007              | 2.896443025     | 3.265241869                 | 5.162138898       | 2.291154335        |
| 253482_at           | AT4G31985 | 6.35037229                        | 16.84821636              | 2.975392767     | 4.592225669                 | 8.538712531       | 4.787553241        |
| 253464_at           | AT4G32030 | 0.993403809                       | 3.103213926              | 0.886398508     | 0.946545191                 | 0.786791965       | 0.967283319        |
| 253448_at           | AT4G32640 | 1.57898071                        | 3.22832321               | 1.756986652     | 0.983680575                 | 1.579156341       | 1.332319579        |
| 253381_at           | AT4G33350 | 0.972280518                       | 2.09673716               | 1.115670438     | 0.922847806                 | 1.22769231        | 1.214458479        |
| 253233_at           | AT4G34290 | 0.557076159                       | 1.614810955              | 0.548198418     | 0.660718214                 | 0.718166582       | 0.65300705         |
| 253248_at           | AT4G34670 | 13.44235939                       | 36.21967069              | 15.33334971     | 15.90458348                 | 20.83618986       | 8.173166271        |
| 253221_at           | AT4G34870 | 14.82394979                       | 31.44476654              | 10.49553369     | 6.645023423                 | 9.665002057       | 8.510764972        |
| 253138_at           | AT4G35490 | 2.949690775                       | 8.891613617              | 2.190598458     | 2.334115693                 | 4.897771996       | 2.086721667        |
| 253159_at           | AT4G35570 | 1.296990783                       | 3.718223194              | 1.383300993     | 1.280912566                 | 2.121807062       | 1.284998445        |
| 246210_at           | AT4G36420 | 0.629098947                       | 3.320065353              | 0.564863783     | 0.591901624                 | 0.824501447       | 0.676341518        |
| 246284_at           | AT4G36780 | 1.222766524                       | 2.508440726              | 1.130442151     | 1.046091853                 | 0.837066003       | 0.937858255        |
| 253058_at           | AT4G37660 | 1.102085338                       | 3.544072182              | 0.847058157     | 0.959478041                 | 1.519023449       | 0.960701433        |
| 253070_at           | AT4G37850 | 0.408930104                       | 1.1852198                | 0.649168425     | 0.657124551                 | 0.572996266       | 0.561219308        |
| 252997_at           | AT4G38400 | 0.771512984                       | 2.101340102              | 0.725537823     | 0.850798103                 | 1.184599008       | 0.937563666        |
| 252947_at           | AT4G38600 | 1.299209946                       | 3.841994958              | 1.383583191     | 1.330206884                 | 1.657925119       | 1.526812732        |
| 252973_s_at         | AT4G38740 | 7.379354491                       | 31.91848091              | 11.91045765     | 11.38864217                 | 12.75076957       | 12.21426524        |
| 252934_at           | AT4G39120 | 0.849076337                       | 2.316149138              | 1.258290225     | 0.892602796                 | 1.26907796        | 0.953037147        |
| 252942_at           | AT4G39300 | 1.194553316                       | 5.978279457              | 1.135786075     | 1.190123242                 | 2.196185988       | 1.403262147        |

**Supplementary Tables pertaining to Figure 3**

**Supplementary Table S19. Loci enriched in individual cell types from microarray data**

**Loci enriched in Non-Hair Epidermis (WER) from micorarray expression data analysis (1.7 fold, p <0.5)**

| Affymetrix Probeset | Locus     | Mean Microarray Expression Values |                          |                 |                             |                   |                    |
|---------------------|-----------|-----------------------------------|--------------------------|-----------------|-----------------------------|-------------------|--------------------|
|                     |           | Root Hairs (COBL9)                | Non-Hair Epidermis (WER) | Cortex (CORTEX) | Endodermis/ Quiescent (SCR) | Vasculature (WOL) | Columella (PET111) |
| 252850_at           | AT4G39880 | 2.496925955                       | 6.521775524              | 2.429495493     | 2.202540048                 | 3.747180802       | 1.423674063        |
| 252824_at           | AT4G40030 | 11.58495188                       | 19.86157625              | 8.18308209      | 11.05256517                 | 10.48216732       | 8.814719046        |
| 245862_at           | AT5G01010 | 2.2094385                         | 4.288057024              | 2.077967958     | 1.474000615                 | 1.666979998       | 1.916343554        |
| 250992_at           | AT5G02260 | 3.221214528                       | 13.77040078              | 2.588498013     | 0.627560987                 | 0.801968371       | 5.401973136        |
| 250969_at           | AT5G02740 | 2.552701657                       | 5.114527767              | 1.78760385      | 1.324110947                 | 2.592210732       | 1.708249917        |
| 250970_at           | AT5G02770 | 0.851348527                       | 2.745190361              | 1.017826189     | 0.917443226                 | 1.179644873       | 0.95699493         |
| 250845_at           | AT5G04600 | 1.275516966                       | 7.366062261              | 1.894828074     | 3.159556454                 | 4.157398076       | 2.602714626        |
| 250779_at           | AT5G05470 | 1.118618514                       | 2.552498227              | 1.036978011     | 0.881232558                 | 1.42841096        | 0.899196402        |
| 250703_at           | AT5G06360 | 1.802215131                       | 10.77040892              | 2.100216796     | 3.625265891                 | 5.684141722       | 2.64272086         |
| 250564_at           | AT5G08060 | 3.857954581                       | 6.674247705              | 2.985196705     | 2.100433591                 | 2.068982565       | 1.829252855        |
| 250546_at           | AT5G08180 | 0.914492567                       | 8.415773105              | 2.18629562      | 3.355945452                 | 4.856436587       | 1.886502421        |
| 245886_at           | AT5G09510 | 1.536598252                       | 6.735207362              | 1.544852177     | 2.279042113                 | 3.546438227       | 1.612526571        |
| 250433_at           | AT5G10400 | 1.107025982                       | 7.469249967              | 3.655243482     | 3.233586609                 | 4.035547899       | 1.783246023        |
| 250353_at           | AT5G11630 | 2.437003947                       | 6.051348034              | 1.255651264     | 1.219905522                 | 2.044527083       | 1.510025818        |
| 250355_at           | AT5G11700 | 1.385483616                       | 2.65769508               | 1.481352759     | 1.185044341                 | 0.973325718       | 1.115068465        |
| 250275_at           | AT5G13030 | 0.788198633                       | 1.657091921              | 0.706650692     | 0.680549253                 | 0.816650384       | 0.740905052        |
| 250226_at           | AT5G13780 | 2.617867535                       | 9.299247885              | 2.113273169     | 2.710747256                 | 3.025119407       | 1.363265949        |
| 250214_at           | AT5G13870 | 0.506889834                       | 5.424404941              | 0.646213331     | 0.642395179                 | 0.596689066       | 0.960804524        |
| 246585_at           | AT5G14750 | 0.512374866                       | 3.660555047              | 0.839625513     | 0.429166189                 | 0.676748993       | 0.719681613        |
| 246537_at           | AT5G15940 | 1.076284251                       | 2.056433692              | 0.631369091     | 0.624907332                 | 0.700810651       | 0.84019682         |
| 246490_at           | AT5G15950 | 3.510050553                       | 8.37839712               | 0.803438322     | 0.781113121                 | 0.897334683       | 1.213999299        |
| 250132_at           | AT5G16560 | 0.49452662                        | 2.002404914              | 0.495222797     | 0.46858472                  | 0.540139854       | 0.507619984        |
| 249954_at           | AT5G18920 | 0.54650419                        | 1.421820125              | 0.518540024     | 0.567813613                 | 0.735002629       | 0.560337332        |
| 245937_at           | AT5G19750 | 1.593756009                       | 4.494213166              | 2.38800243      | 1.481674134                 | 2.026796007       | 1.103139917        |
| 246070_at           | AT5G20160 | 1.152505618                       | 15.71606531              | 2.261729092     | 4.60678689                  | 8.890734092       | 3.869231678        |
| 246031_at           | AT5G21160 | 0.771666628                       | 3.562659776              | 1.138809852     | 1.505677456                 | 1.854319319       | 1.525229715        |
| 249945_at           | AT5G22440 | 8.120110497                       | 23.11389821              | 6.891497693     | 8.044059159                 | 10.88622808       | 4.143356196        |
| 249829_at           | AT5G23290 | 1.780237715                       | 4.48926509               | 1.374248245     | 1.488307235                 | 2.387987234       | 1.320388927        |
| 249836_at           | AT5G23420 | 0.333261442                       | 1.369944034              | 0.471439361     | 0.497310638                 | 0.602662926       | 0.420663318        |
| 249814_at           | AT5G23840 | 3.454403462                       | 8.163245914              | 2.652576851     | 1.085273623                 | 1.170642861       | 1.853218862        |
| 246958_at           | AT5G24690 | 0.653712982                       | 3.006700749              | 1.02157083      | 1.058844418                 | 1.191787453       | 0.962694823        |

**Supplementary Tables pertaining to Figure 3**

**Supplementary Table S19. Loci enriched in individual cell types from microarray data**

**Loci enriched in Non-Hair Epidermis (WER) from micorarray expression data analysis (1.7 fold, p <0.5)**

| Affymetrix Probeset | Locus     | Mean Microarray Expression Values |                          |                 |                             |                   |                    |
|---------------------|-----------|-----------------------------------|--------------------------|-----------------|-----------------------------|-------------------|--------------------|
|                     |           | Root Hairs (COBL9)                | Non-Hair Epidermis (WER) | Cortex (CORTEX) | Endodermis/ Quiescent (SCR) | Vasculature (WOL) | Columella (PET111) |
| 246784_at           | AT5G27430 | 2.561912153                       | 5.219238719              | 1.547718657     | 1.302461099                 | 1.594582823       | 1.540795925        |
| 246747_at           | AT5G27700 | 12.31852922                       | 30.97228418              | 8.705187758     | 10.46743773                 | 17.50338273       | 9.345293905        |
| 246746_at           | AT5G27820 | 0.839792538                       | 4.067331467              | 0.65297461      | 0.600315491                 | 1.196918683       | 0.758372709        |
| 246730_at           | AT5G28060 | 4.461479022                       | 15.49034037              | 4.137157938     | 4.686668744                 | 6.720057962       | 1.907313277        |
| 249722_at           | AT5G35430 | 0.557861477                       | 1.153393368              | 0.475130924     | 0.467493655                 | 0.507814437       | 0.532634102        |
| 249675_at           | AT5G35940 | 1.942720275                       | 12.87874047              | 2.134405553     | 0.74199573                  | 1.055029343       | 7.444838626        |
| 249583_at           | AT5G37770 | 1.197528045                       | 5.386930756              | 1.156919907     | 1.763801601                 | 1.115692571       | 1.685993433        |
| 249493_at           | AT5G39080 | 0.687106697                       | 1.8978199                | 0.886173591     | 0.672675054                 | 0.861847475       | 0.938341191        |
| 249443_at           | AT5G39600 | 1.711093127                       | 3.221977188              | 1.132601308     | 1.09911368                  | 1.511311409       | 1.026112993        |
| 249466_at           | AT5G39740 | 5.534430537                       | 22.49835156              | 5.474515787     | 5.381457678                 | 10.63139776       | 4.327911653        |
| 249427_at           | AT5G39850 | 0.788449235                       | 3.385568373              | 0.842779646     | 1.031719971                 | 1.749821161       | 1.272305575        |
| 249336_at           | AT5G41070 | 0.569119495                       | 2.126597467              | 0.60067741      | 0.545394491                 | 0.627962379       | 0.726363008        |
| 249254_at           | AT5G42110 | 0.708705991                       | 2.073919936              | 0.835188687     | 0.603843445                 | 0.926066479       | 1.104889758        |
| 249206_at           | AT5G42630 | 1.665967713                       | 3.605324996              | 0.592090418     | 0.964729531                 | 0.568618146       | 0.833724725        |
| 249182_at           | AT5G42960 | 1.376020625                       | 3.37235712               | 1.184816021     | 1.172822275                 | 1.194165436       | 0.896592344        |
| 249186_at           | AT5G43040 | 1.651030124                       | 3.707768883              | 0.960844959     | 0.758499753                 | 0.90614446        | 0.916962137        |
| 249067_at           | AT5G43960 | 1.983415632                       | 6.290795742              | 2.058616049     | 1.658193476                 | 3.213974812       | 1.869314485        |
| 249014_at           | AT5G44710 | 1.837747444                       | 4.145132172              | 1.581910782     | 1.61996938                  | 2.380152441       | 0.983289771        |
| 248958_at           | AT5G45590 | 2.145747033                       | 4.852325705              | 1.051217846     | 1.079134467                 | 1.915431444       | 0.921081044        |
| 248919_at           | AT5G45920 | 1.786656605                       | 4.591067181              | 1.749267772     | 1.579010143                 | 1.530837498       | 2.043030886        |
| 248826_at           | AT5G47080 | 0.667835892                       | 2.180818335              | 1.063539        | 1.105658462                 | 1.179271772       | 1.009327078        |
| 248800_at           | AT5G47320 | 2.894287394                       | 5.671622658              | 2.239135596     | 2.149779648                 | 3.32085193        | 1.881645533        |
| 248768_at           | AT5G47700 | 10.03481447                       | 24.60509139              | 9.760998201     | 11.48581731                 | 13.75445562       | 8.814655377        |
| 248664_at           | AT5G48580 | 6.983791816                       | 14.23136006              | 5.10436362      | 2.409777295                 | 3.99244152        | 2.92477759         |
| 248655_at           | AT5G48760 | 1.887800552                       | 13.358938                | 2.404765445     | 2.914336948                 | 6.273362229       | 2.305467956        |
| 248473_at           | AT5G50810 | 1.701037601                       | 7.797699868              | 1.566185782     | 2.389245173                 | 4.458991748       | 2.014232686        |
| 248434_at           | AT5G51440 | 0.802617306                       | 2.810585841              | 0.973707537     | 0.78416857                  | 0.519695875       | 1.191709205        |
| 248407_at           | AT5G51500 | 1.355524436                       | 3.741051379              | 1.072380795     | 0.590223884                 | 0.903666377       | 1.467782445        |
| 248295_at           | AT5G53070 | 0.693775415                       | 2.634890091              | 0.623862171     | 0.710588399                 | 1.403038003       | 0.726852915        |
| 248268_at           | AT5G53480 | 0.82596205                        | 3.2650191                | 0.817580856     | 0.780005626                 | 0.85591601        | 0.742689353        |
| 248131_at           | AT5G54830 | 0.977162769                       | 2.262576459              | 0.880080333     | 0.631129624                 | 0.853943056       | 0.882128914        |



**Supplementary Tables pertaining to Figure 3**

**Supplementary Table S19. Loci enriched in individual cell types from microarray data**

**Loci enriched in Non-Hair Epidermis (WER) from micorarray expression data analysis (1.7 fold, p <0.5)**

| Affymetrix Probeset | Locus     | Mean Microarray Expression Values |                          |                 |                             |                   |                    |
|---------------------|-----------|-----------------------------------|--------------------------|-----------------|-----------------------------|-------------------|--------------------|
|                     |           | Root Hairs (COBL9)                | Non-Hair Epidermis (WER) | Cortex (CORTEX) | Endodermis/ Quiescent (SCR) | Vasculature (WOL) | Columella (PET111) |
| 248103_at           | AT5G55160 | 4.755361508                       | 9.513522598              | 4.117833756     | 5.378237005                 | 5.500378968       | 2.423821555        |
| 247991_at           | AT5G56320 | 0.506196195                       | 5.547149126              | 0.579223398     | 0.528327951                 | 0.825295755       | 0.817884048        |
| 247935_at           | AT5G56940 | 3.773566038                       | 8.247251609              | 2.481985383     | 2.771606684                 | 4.677002095       | 2.03020412         |
| 247781_at           | AT5G58784 | 1.092092941                       | 4.868818304              | 0.73614075      | 0.745991649                 | 0.831563817       | 1.045108585        |
| 247699_at           | AT5G59840 | 0.64888866                        | 1.870813184              | 0.716628061     | 0.750513895                 | 0.795055865       | 0.675265199        |
| 247632_at           | AT5G60460 | 3.372715837                       | 6.739840442              | 2.082936461     | 1.747818415                 | 1.132562325       | 1.330479236        |
| 247551_at           | AT5G60980 | 1.988603786                       | 4.395137915              | 2.206241039     | 1.195320313                 | 1.932280188       | 1.163732746        |
| 247555_at           | AT5G61020 | 1.686612178                       | 11.15529628              | 1.582749208     | 1.676124235                 | 3.658583133       | 1.531655478        |
| 247520_at           | AT5G61310 | 0.727533647                       | 3.127513202              | 0.791232236     | 1.253258935                 | 1.820339819       | 1.216426248        |
| 247517_at           | AT5G61780 | 5.218148849                       | 12.02930422              | 4.364735734     | 2.425394063                 | 4.526105561       | 2.811055877        |
| 247476_at           | AT5G62330 | 3.60006554                        | 6.391191923              | 1.144906038     | 0.507283838                 | 1.125299206       | 1.07363012         |
| 247477_at           | AT5G62340 | 1.77450901                        | 27.88125623              | 9.905056975     | 1.00503119                  | 1.75903063        | 16.23457129        |
| 247454_at           | AT5G62440 | 0.867142756                       | 6.01008702               | 1.565863352     | 2.415718957                 | 3.446233564       | 1.683432165        |
| 247323_at           | AT5G64170 | 1.227454417                       | 2.556508798              | 0.984847859     | 0.818694722                 | 0.880647967       | 1.012261274        |
| 247192_at           | AT5G65360 | 2.089840139                       | 11.37979247              | 6.038166779     | 5.606273491                 | 6.683136522       | 4.307970822        |
| 247068_at           | AT5G66800 | 0.958907934                       | 2.048546336              | 1.017477984     | 0.672729226                 | 0.929681008       | 0.815671204        |
| 247010_at           | AT5G67510 | 5.088411906                       | 17.47178311              | 3.243901633     | 4.616234994                 | 10.02329526       | 3.177937738        |
| 247014_at           | AT5G67630 | 0.435414279                       | 2.032375487              | 0.587697808     | 0.774504118                 | 1.107686712       | 0.794366206        |

**Supplementary Tables pertaining to Figure 3**

**Supplementary Table S19. Loci enriched in individual cell types from microarray data**

**Loci enriched in Cortex (CORTEX) from micorarray expression data analysis (1.7 fold, p <0.5)**

| Affymetrix Probeset | Locus     | Mean Microarray Expression Values |                          |                 |                             |                   |                    |
|---------------------|-----------|-----------------------------------|--------------------------|-----------------|-----------------------------|-------------------|--------------------|
|                     |           | Root Hairs (COBL9)                | Non-Hair Epidermis (WER) | Cortex (CORTEX) | Endodermis/ Quiescent (SCR) | Vasculature (WOL) | Columella (PET111) |
| 259442_at           | AT1G02310 | 1.666543819                       | 0.530829893              | 5.689009822     | 2.950563907                 | 0.939103175       | 0.849639119        |
| 259417_at           | AT1G02340 | 0.707069942                       | 0.580720016              | 1.221629263     | 0.685832052                 | 0.612316673       | 0.508466669        |
| 262118_at           | AT1G02850 | 0.726687529                       | 0.647613082              | 5.245291954     | 0.920860783                 | 0.715723094       | 0.755775476        |
| 264355_at           | AT1G03210 | 2.459418379                       | 3.418233759              | 7.192265583     | 4.035634716                 | 2.109431643       | 2.62565038         |
| 263677_at           | AT1G04520 | 0.765418806                       | 0.953537452              | 3.006306124     | 1.331567265                 | 1.524231258       | 0.84815375         |
| 265214_at           | AT1G05000 | 0.720858258                       | 0.546187614              | 1.459467302     | 0.723135204                 | 0.736422842       | 0.621708476        |
| 263183_at           | AT1G05570 | 1.667724559                       | 1.036260341              | 7.809780195     | 1.614703609                 | 1.273501765       | 1.144488958        |
| 263231_at           | AT1G05680 | 1.713826365                       | 4.016573036              | 11.17729873     | 0.661576554                 | 0.628186116       | 0.485247825        |
| 260955_at           | AT1G06000 | 6.213115785                       | 7.114996706              | 19.97626083     | 11.25269296                 | 4.023116842       | 2.525586671        |
| 262626_at           | AT1G06430 | 0.808416069                       | 0.618892735              | 1.514055517     | 0.68734792                  | 0.659110202       | 0.648147836        |
| 262637_at           | AT1G06640 | 1.194027685                       | 0.84134806               | 13.9137244      | 6.002252911                 | 1.976148128       | 1.3420765          |
| 262638_at           | AT1G06650 | 0.583235718                       | 0.495487221              | 1.38124129      | 0.509848278                 | 0.515566915       | 0.538593436        |
| 262632_at           | AT1G06680 | 0.809035208                       | 0.626921684              | 2.443727291     | 1.266956554                 | 1.189743425       | 1.20249599         |
| 261434_at           | AT1G07650 | 0.64552967                        | 0.563113163              | 2.858688428     | 1.113542952                 | 0.749150365       | 0.734728386        |
| 261417_at           | AT1G07700 | 0.478383537                       | 0.67534863               | 1.557252372     | 0.644213237                 | 0.543094234       | 0.651164908        |
| 261746_at           | AT1G08380 | 0.506704                          | 0.48031413               | 1.157740016     | 0.57344751                  | 0.658908423       | 0.565744653        |
| 264804_at           | AT1G08590 | 2.99139199                        | 2.97538764               | 5.154214639     | 2.021050019                 | 1.424298945       | 1.001909973        |
| 264672_at           | AT1G09750 | 0.511754423                       | 0.57488353               | 12.31979941     | 0.570477277                 | 0.724601856       | 0.576746398        |
| 261834_at           | AT1G10640 | 0.465216136                       | 0.425342479              | 1.071984247     | 0.472183939                 | 0.524271245       | 0.511359563        |
| 262825_at           | AT1G11790 | 2.151755872                       | 1.841331103              | 5.195513193     | 2.299833198                 | 2.013889148       | 1.601573223        |
| 264371_at           | AT1G12090 | 2.496977304                       | 1.260559151              | 32.07568055     | 14.47077848                 | 3.871899124       | 1.679623248        |
| 260969_at           | AT1G12240 | 7.934822922                       | 5.647472287              | 17.69177912     | 6.217141479                 | 3.356619719       | 3.630603985        |
| 261203_at           | AT1G12845 | 0.705724079                       | 0.569876867              | 5.176111815     | 0.895093034                 | 0.743949546       | 0.752314163        |
| 262826_at           | AT1G13080 | 1.044374545                       | 0.508140649              | 2.474066533     | 0.718139041                 | 0.76981926        | 1.161509948        |
| 262609_at           | AT1G13930 | 0.814564911                       | 0.540162641              | 12.48159796     | 3.870124881                 | 3.82229184        | 2.352721886        |
| 262653_at           | AT1G14130 | 0.666450649                       | 0.698038602              | 2.657631048     | 1.404316236                 | 0.839220095       | 1.099342944        |
| 261480_at           | AT1G14280 | 0.590330231                       | 0.849015226              | 3.859740637     | 1.771289619                 | 1.57444164        | 0.947251039        |
| 261471_at           | AT1G14460 | 0.627488204                       | 0.910242429              | 2.605886592     | 1.096859974                 | 1.048449185       | 0.924721154        |
| 262585_at           | AT1G15460 | 0.721397688                       | 0.620781167              | 1.435766183     | 0.648214276                 | 0.816418587       | 0.826147741        |
| 261768_at           | AT1G15550 | 0.719760447                       | 0.584581513              | 4.792605028     | 0.810570837                 | 0.869788507       | 0.735958827        |
| 255764_at           | AT1G16720 | 2.449211379                       | 1.309071789              | 4.55069313      | 1.936917661                 | 1.41510652        | 1.836065542        |

**Supplementary Tables pertaining to Figure 3**

**Supplementary Table S19. Loci enriched in individual cell types from microarray data**

**Loci enriched in Cortex (CORTEX) from micorarray expression data analysis (1.7 fold, p <0.5)**

| Affymetrix Probeset | Locus     | Mean Microarray Expression Values |                          |                 |                             |                   |                    |
|---------------------|-----------|-----------------------------------|--------------------------|-----------------|-----------------------------|-------------------|--------------------|
|                     |           | Root Hairs (COBL9)                | Non-Hair Epidermis (WER) | Cortex (CORTEX) | Endodermis/ Quiescent (SCR) | Vasculature (WOL) | Columella (PET111) |
| 262483_at           | AT1G17220 | 0.816526306                       | 1.085473289              | 2.940254976     | 1.550141543                 | 1.523866745       | 1.575228407        |
| 261060_at           | AT1G17340 | 1.910561115                       | 1.369419781              | 3.974872605     | 1.74709114                  | 0.746111804       | 1.36097193         |
| 261428_at           | AT1G18870 | 0.471885503                       | 0.427668085              | 1.956220176     | 0.49625229                  | 0.556598478       | 0.488686614        |
| 256012_at           | AT1G19250 | 0.462230539                       | 0.442595312              | 1.738892621     | 0.632019947                 | 0.5731053         | 0.463329665        |
| 260676_at           | AT1G19450 | 2.14074893                        | 0.923910417              | 21.77574744     | 11.30890348                 | 3.324777818       | 3.074373898        |
| 261230_at           | AT1G20010 | 7.041923162                       | 6.835280587              | 15.67449104     | 5.808057963                 | 4.144446767       | 1.428613209        |
| 261226_at           | AT1G20190 | 0.903862523                       | 1.384541883              | 15.77908051     | 2.712744613                 | 2.443004283       | 1.025507704        |
| 261455_at           | AT1G21070 | 0.908707125                       | 1.18125824               | 3.546965104     | 1.113865598                 | 1.538028153       | 1.176531698        |
| 264209_at           | AT1G22740 | 0.627281943                       | 0.620744144              | 6.105624133     | 2.412591587                 | 1.331705666       | 1.277480404        |
| 261273_at           | AT1G26650 | 1.439427717                       | 1.91915835               | 4.111678646     | 1.326760026                 | 2.070464509       | 1.853067382        |
| 264449_at           | AT1G27460 | 0.906191188                       | 0.779507285              | 2.569148757     | 1.258428329                 | 1.386332071       | 0.946088179        |
| 256191_at           | AT1G30130 | 6.112997719                       | 3.831278751              | 11.12081165     | 5.049045309                 | 2.880173727       | 2.59741999         |
| 256309_at           | AT1G30380 | 0.607046964                       | 0.61771923               | 6.921888716     | 2.740002574                 | 1.522079812       | 0.865819348        |
| 262557_at           | AT1G31330 | 0.744619301                       | 0.597247184              | 4.488529232     | 1.741843665                 | 1.010218051       | 0.972093025        |
| 261618_at           | AT1G33110 | 0.778546887                       | 0.80124504               | 2.642928636     | 1.005115784                 | 0.902417765       | 0.730425622        |
| 255982_at           | AT1G34000 | 2.396184644                       | 2.357504577              | 5.363427676     | 2.873471793                 | 2.288344052       | 2.176767495        |
| 245740_at           | AT1G44100 | 1.393154613                       | 1.363467624              | 6.319206385     | 1.256235429                 | 1.149195451       | 2.431690318        |
| 245737_at           | AT1G44160 | 0.719132031                       | 0.492374953              | 1.855297804     | 1.03448719                  | 0.625460693       | 0.710851987        |
| 245213_at           | AT1G44575 | 1.018038944                       | 0.690203076              | 4.649693017     | 0.932203816                 | 1.039547564       | 1.024322587        |
| 262444_at           | AT1G47480 | 1.2953242                         | 0.673083721              | 2.90776657      | 1.007603589                 | 0.988520331       | 0.734774775        |
| 261635_at           | AT1G50020 | 1.800569448                       | 1.261656962              | 3.877691195     | 2.056066889                 | 1.245780189       | 1.336731634        |
| 262473_at           | AT1G50250 | 3.021516593                       | 1.287255147              | 9.190832679     | 3.955978967                 | 1.784869501       | 2.132915334        |
| 246371_at           | AT1G51940 | 0.522783753                       | 0.769328048              | 3.266233385     | 1.387886527                 | 1.66998717        | 1.293057204        |
| 260639_at           | AT1G53180 | 5.828157206                       | 6.522371964              | 11.08835454     | 4.365665501                 | 1.370182845       | 5.688176081        |
| 259965_at           | AT1G53670 | 1.876165239                       | 1.011004033              | 3.190915909     | 1.736460353                 | 1.129019746       | 1.58011632         |
| 262954_at           | AT1G54500 | 0.900016428                       | 0.645403203              | 2.38335857      | 1.221676067                 | 1.038601626       | 0.945652743        |
| 256150_at           | AT1G55120 | 0.672412035                       | 0.410205256              | 1.857967007     | 0.708161355                 | 0.685468354       | 0.527215835        |
| 257510_at           | AT1G55360 | 0.587744222                       | 0.643641406              | 4.069159495     | 0.848757228                 | 1.392099576       | 1.296361756        |
| 260592_at           | AT1G55850 | 3.960353716                       | 5.002634434              | 14.6165431      | 7.252925698                 | 2.523226344       | 4.706200467        |
| 256022_at           | AT1G58360 | 0.586145905                       | 0.569505695              | 9.350237899     | 1.470728736                 | 0.813194444       | 0.835437787        |
| 262913_at           | AT1G59960 | 2.527106815                       | 2.511951316              | 5.2828482       | 2.01865393                  | 1.31140247        | 2.765455208        |

**Supplementary Tables pertaining to Figure 3**

**Supplementary Table S19. Loci enriched in individual cell types from microarray data**

**Loci enriched in Cortex (CORTEX) from micorarray expression data analysis (1.7 fold, p <0.5)**

| Affymetrix Probeset | Locus     | Mean Microarray Expression Values |                          |                 |                             |                   |                    |
|---------------------|-----------|-----------------------------------|--------------------------|-----------------|-----------------------------|-------------------|--------------------|
|                     |           | Root Hairs (COBL9)                | Non-Hair Epidermis (WER) | Cortex (CORTEX) | Endodermis/ Quiescent (SCR) | Vasculature (WOL) | Columella (PET111) |
| 265033_at           | AT1G61520 | 0.668682132                       | 0.510188465              | 3.001758977     | 1.319838799                 | 1.057684183       | 0.89405778         |
| 264424_at           | AT1G61740 | 2.871885558                       | 1.232128568              | 7.563847348     | 4.434210962                 | 1.400769806       | 1.00232562         |
| 265111_at           | AT1G62510 | 0.679038642                       | 0.511528612              | 7.272327173     | 1.119434239                 | 0.782185153       | 0.645027174        |
| 262643_at           | AT1G62770 | 0.610927386                       | 0.755983441              | 2.480454624     | 0.724194472                 | 0.724724839       | 0.731324523        |
| 260317_at           | AT1G63800 | 2.200569535                       | 1.111485789              | 7.034408164     | 2.715529407                 | 1.788653989       | 1.458103577        |
| 261953_at           | AT1G64440 | 1.789212843                       | 2.345367194              | 4.579389428     | 2.01555208                  | 1.966916497       | 1.160777136        |
| 262882_at           | AT1G64900 | 0.469065061                       | 0.511191739              | 1.065770837     | 0.535747525                 | 0.586460351       | 0.606241835        |
| 262863_at           | AT1G64910 | 0.456925583                       | 0.432774098              | 1.910629493     | 0.414171213                 | 0.444278024       | 0.423895367        |
| 262864_at           | AT1G64920 | 1.050093308                       | 1.511764134              | 4.101613715     | 0.424051045                 | 0.528860199       | 0.47320514         |
| 261907_at           | AT1G65060 | 1.079089793                       | 0.980992972              | 10.55821375     | 2.392330911                 | 1.000663768       | 1.215685857        |
| 256324_at           | AT1G66760 | 0.818777062                       | 0.887468774              | 3.40102371      | 1.290445846                 | 0.876679859       | 1.130243554        |
| 245195_at           | AT1G67740 | 0.542803059                       | 0.526500332              | 1.33537977      | 0.626006236                 | 0.63761252        | 0.586911048        |
| 260008_at           | AT1G68070 | 2.097921109                       | 1.963310117              | 3.812191049     | 2.068866751                 | 1.850918047       | 1.624942963        |
| 264315_at           | AT1G70370 | 0.719465765                       | 0.868472109              | 16.07980032     | 2.792352726                 | 3.302570082       | 1.676872256        |
| 260309_at           | AT1G70580 | 1.276725718                       | 1.082606441              | 3.5901263       | 1.723152793                 | 1.520959852       | 1.178159221        |
| 262304_at           | AT1G70890 | 0.473157658                       | 0.404568224              | 4.158191715     | 0.859072984                 | 0.756836969       | 0.449838105        |
| 262313_at           | AT1G70900 | 0.673685944                       | 1.026171669              | 2.88047371      | 1.124837746                 | 0.948824126       | 1.056611273        |
| 262315_at           | AT1G70990 | 1.013029798                       | 1.004969563              | 2.116058293     | 0.956847355                 | 1.077353491       | 0.851330439        |
| 260429_at           | AT1G72450 | 1.185472337                       | 0.483874967              | 8.411877249     | 2.213908164                 | 0.886228237       | 1.019826899        |
| 262381_at           | AT1G72900 | 0.53172096                        | 0.504619178              | 1.578097476     | 0.876618535                 | 0.511815214       | 0.484729551        |
| 245736_at           | AT1G73330 | 0.928953956                       | 0.60696005               | 16.21417175     | 6.228414756                 | 6.295588918       | 3.508829619        |
| 260077_at           | AT1G73620 | 0.578056179                       | 0.762781125              | 10.76591821     | 3.272469783                 | 1.705982627       | 0.621947225        |
| 260072_at           | AT1G73650 | 1.569466707                       | 1.105903765              | 3.587521455     | 1.47133973                  | 1.199369136       | 1.51095198         |
| 262177_at           | AT1G74710 | 0.471261969                       | 0.502274704              | 1.833021561     | 0.609418498                 | 0.615177993       | 0.557252594        |
| 262218_at           | AT1G74760 | 1.119540275                       | 0.946576961              | 2.314242891     | 0.854822055                 | 0.88471865        | 1.239850585        |
| 262980_at           | AT1G75680 | 7.804360409                       | 7.6169332                | 15.88649287     | 5.823804933                 | 8.570800417       | 5.531746563        |
| 262978_at           | AT1G75780 | 7.740788391                       | 10.08364444              | 19.73189212     | 6.244605607                 | 2.507833138       | 1.278029363        |
| 261769_at           | AT1G76100 | 0.466924768                       | 0.485777276              | 1.083587137     | 0.493294349                 | 0.53535051        | 0.517512879        |
| 261728_at           | AT1G76160 | 2.743451495                       | 2.179905466              | 14.95422978     | 6.391866397                 | 2.724213664       | 1.372755868        |
| 259975_at           | AT1G76470 | 0.648221646                       | 0.593140022              | 8.13387049      | 1.221992727                 | 0.840816973       | 0.613885704        |
| 259983_at           | AT1G76490 | 6.680472589                       | 7.549820807              | 19.09175615     | 10.2407231                  | 6.746842071       | 4.250249309        |

**Supplementary Tables pertaining to Figure 3**

**Supplementary Table S19. Loci enriched in individual cell types from microarray data**

**Loci enriched in Cortex (CORTEX) from micorarray expression data analysis (1.7 fold, p <0.5)**

| Affymetrix Probeset | Locus     | Mean Microarray Expression Values |                          |                 |                             |                   |                    |
|---------------------|-----------|-----------------------------------|--------------------------|-----------------|-----------------------------|-------------------|--------------------|
|                     |           | Root Hairs (COBL9)                | Non-Hair Epidermis (WER) | Cortex (CORTEX) | Endodermis/ Quiescent (SCR) | Vasculature (WOL) | Columella (PET111) |
| 259882_at           | AT1G76670 | 8.096127859                       | 7.288934134              | 16.50375176     | 6.016953967                 | 6.317799338       | 8.754952155        |
| 262134_at           | AT1G77990 | 0.481899558                       | 0.45532978               | 1.799688031     | 0.550093667                 | 0.632497195       | 0.570698131        |
| 262164_at           | AT1G78070 | 0.691003669                       | 0.727614092              | 2.404356873     | 1.158183726                 | 0.646148958       | 0.633392126        |
| 264300_at           | AT1G78670 | 2.082823523                       | 0.716425996              | 4.152183056     | 1.293227862                 | 0.997154436       | 0.740309889        |
| 264100_at           | AT1G78970 | 0.730911375                       | 0.474257096              | 2.034720482     | 0.827083459                 | 0.947303122       | 0.887935316        |
| 264092_at           | AT1G79040 | 0.830200611                       | 1.186600858              | 12.07274712     | 2.970285914                 | 1.889674461       | 1.352886644        |
| 262935_at           | AT1G79410 | 3.473092639                       | 1.673957451              | 6.892611788     | 1.861397385                 | 1.008974935       | 0.780439964        |
| 261346_at           | AT1G79720 | 1.105570655                       | 0.861333649              | 2.771589148     | 1.259170249                 | 1.038599404       | 1.06007559         |
| 262049_at           | AT1G80180 | 0.7724821                         | 0.475168163              | 2.885330011     | 1.053194082                 | 1.021432227       | 0.688140121        |
| 260300_at           | AT1G80340 | 0.683544808                       | 0.611299244              | 2.022199866     | 0.865060696                 | 0.7495896         | 0.738315584        |
| 266330_at           | AT2G01530 | 1.918263366                       | 0.566872852              | 15.43525415     | 4.064724098                 | 2.661042239       | 1.197382216        |
| 263595_at           | AT2G01890 | 0.929784596                       | 0.559300239              | 2.247505667     | 0.506473648                 | 0.626834124       | 0.687721597        |
| 266110_at           | AT2G02080 | 0.838067627                       | 0.595929665              | 2.094278316     | 0.970011004                 | 0.777610814       | 0.749448547        |
| 267481_at           | AT2G02780 | 0.673337872                       | 2.106383744              | 7.26821402      | 4.193933379                 | 1.094472513       | 1.089137566        |
| 266745_at           | AT2G02950 | 0.770163444                       | 0.425353089              | 4.095444373     | 1.406255869                 | 0.766788562       | 0.628500108        |
| 265710_at           | AT2G03370 | 0.682528091                       | 0.481749142              | 1.844701131     | 0.645176019                 | 0.669562358       | 0.575659028        |
| 265569_at           | AT2G05620 | 0.526197672                       | 0.538071237              | 1.378818586     | 0.672023793                 | 0.604844415       | 0.650121363        |
| 265530_at           | AT2G06050 | 8.272937469                       | 3.850908494              | 15.65201299     | 9.021257968                 | 4.156863594       | 7.739400607        |
| 263772_at           | AT2G06255 | 0.399529504                       | 0.432035979              | 1.239074462     | 0.558089348                 | 0.505942948       | 0.443630381        |
| 266215_at           | AT2G06850 | 2.365433047                       | 10.00974777              | 23.18250995     | 8.163199043                 | 6.769992996       | 3.113085516        |
| 266500_at           | AT2G06925 | 0.862071166                       | 0.690851722              | 6.350120714     | 3.233406764                 | 0.926330639       | 0.823286982        |
| 263350_at           | AT2G13360 | 0.639204811                       | 0.592107891              | 1.74149361      | 0.642609915                 | 0.691550105       | 0.618226891        |
| 266614_at           | AT2G14910 | 2.225593386                       | 1.761784543              | 3.966886878     | 2.250288236                 | 1.590934049       | 1.598744031        |
| 265472_at           | AT2G15580 | 0.785077957                       | 0.560965242              | 3.044295255     | 1.227020738                 | 0.864809955       | 0.79264853         |
| 265479_at           | AT2G15760 | 1.031341372                       | 0.681126775              | 3.056536424     | 1.080817623                 | 1.353270039       | 1.072815873        |
| 263098_at           | AT2G16005 | 0.839337453                       | 1.040841355              | 5.056780371     | 2.16408294                  | 1.597010662       | 2.070545946        |
| 265924_at           | AT2G18620 | 0.520903612                       | 0.51439307               | 1.252034136     | 0.681078492                 | 0.686812919       | 0.543942239        |
| 265433_at           | AT2G20950 | 1.032038813                       | 0.529677252              | 1.883475315     | 0.897434616                 | 0.731836355       | 0.632150372        |
| 264006_at           | AT2G22430 | 2.52132327                        | 1.490104525              | 4.536019389     | 2.534097075                 | 1.177182653       | 1.658666174        |
| 245076_at           | AT2G23170 | 4.496469294                       | 0.472033162              | 9.736142539     | 2.406421001                 | 0.980641695       | 0.801511628        |
| 266578_at           | AT2G23910 | 0.793430233                       | 0.826105154              | 12.83449825     | 3.164066443                 | 1.01392997        | 2.054345373        |

**Supplementary Tables pertaining to Figure 3**

**Supplementary Table S19. Loci enriched in individual cell types from microarray data**

**Loci enriched in Cortex (CORTEX) from micorarray expression data analysis (1.7 fold, p <0.5)**

| Affymetrix Probeset | Locus     | Mean Microarray Expression Values |                          |                 |                             |                   |                    |
|---------------------|-----------|-----------------------------------|--------------------------|-----------------|-----------------------------|-------------------|--------------------|
|                     |           | Root Hairs (COBL9)                | Non-Hair Epidermis (WER) | Cortex (CORTEX) | Endodermis/ Quiescent (SCR) | Vasculature (WOL) | Columella (PET111) |
| 266001_at           | AT2G24150 | 0.97664904                        | 0.897806351              | 6.836054602     | 1.270150777                 | 2.524170307       | 1.283373854        |
| 245031_at           | AT2G26360 | 2.14590516                        | 1.488860323              | 3.714358985     | 1.450563922                 | 1.050148564       | 0.98315421         |
| 267612_at           | AT2G26690 | 0.852875676                       | 1.033796655              | 5.903481271     | 1.718656626                 | 1.778462965       | 1.059507548        |
| 266313_at           | AT2G26980 | 1.027944059                       | 1.464464314              | 3.132184596     | 1.709729827                 | 1.388285718       | 1.077600192        |
| 266140_at           | AT2G28120 | 0.884339426                       | 0.654474788              | 1.540963456     | 0.876903951                 | 0.842719616       | 0.790665689        |
| 255818_at           | AT2G33570 | 0.744372666                       | 1.552171555              | 3.880870256     | 0.947314679                 | 1.791806899       | 0.945202229        |
| 256725_at           | AT2G34070 | 1.664237155                       | 1.226818411              | 14.76553321     | 7.158787197                 | 3.978252462       | 2.621708221        |
| 266996_at           | AT2G34490 | 0.500435067                       | 0.447809159              | 1.217694231     | 0.559435825                 | 0.613190749       | 0.535313351        |
| 266901_at           | AT2G34600 | 0.471494966                       | 0.375278849              | 3.505331979     | 1.51331838                  | 0.538820648       | 0.62748442         |
| 263942_at           | AT2G35860 | 3.31284929                        | 1.934348179              | 5.761907937     | 2.827311588                 | 2.025901234       | 2.889919387        |
| 267181_at           | AT2G37760 | 0.646814918                       | 0.531036325              | 3.530417293     | 0.963656035                 | 1.438039336       | 0.633776752        |
| 267093_at           | AT2G38170 | 1.293846605                       | 1.11443505               | 13.6068131      | 4.971184342                 | 2.160858705       | 1.344494128        |
| 267089_at           | AT2G38300 | 0.369040691                       | 0.327407959              | 1.262877132     | 0.365408458                 | 0.392835432       | 0.369906739        |
| 266172_at           | AT2G39010 | 1.99527666                        | 1.122943498              | 5.129140462     | 1.954439069                 | 1.183143013       | 0.806728091        |
| 245061_at           | AT2G39730 | 0.672276075                       | 0.565514647              | 2.816854702     | 0.761899476                 | 0.883288609       | 0.810713695        |
| 263830_at           | AT2G40260 | 0.556736564                       | 0.429605716              | 1.858175469     | 0.535974261                 | 0.549715418       | 0.554888164        |
| 245117_at           | AT2G41560 | 1.466836027                       | 1.834143112              | 3.761936247     | 1.207384839                 | 1.975722235       | 1.504971398        |
| 263977_at           | AT2G42660 | 0.662897197                       | 0.505851291              | 1.155047419     | 0.566580971                 | 0.604631729       | 0.604105397        |
| 266873_at           | AT2G44740 | 1.434050841                       | 2.55178725               | 5.46645242      | 1.596451648                 | 1.383973404       | 0.854728634        |
| 266123_at           | AT2G45180 | 0.797279094                       | 0.704493754              | 21.27096895     | 2.025039431                 | 1.766366433       | 0.935304834        |
| 266583_at           | AT2G46220 | 0.895787672                       | 0.793616842              | 2.17514471      | 1.007747787                 | 0.918542875       | 0.847066968        |
| 263787_at           | AT2G46420 | 0.577090477                       | 0.941620387              | 3.140122334     | 0.952686734                 | 0.770855778       | 1.676226387        |
| 266735_at           | AT2G46930 | 4.223396238                       | 2.165452756              | 9.729366785     | 3.51978869                  | 3.544426167       | 1.128210232        |
| 265768_at           | AT2G48020 | 4.754682848                       | 2.089936802              | 16.80413015     | 5.094057004                 | 1.839738676       | 1.449043374        |
| 258602_at           | AT3G02750 | 2.000672575                       | 1.971398973              | 4.626489824     | 1.961698483                 | 1.405496563       | 1.674447323        |
| 259351_at           | AT3G05150 | 0.60163669                        | 1.079613327              | 14.79183062     | 2.631281752                 | 1.088810129       | 0.696105247        |
| 258913_at           | AT3G06450 | 0.784602539                       | 0.727610396              | 4.326227321     | 2.379677529                 | 2.514740764       | 1.074119879        |
| 258515_at           | AT3G06650 | 5.095798186                       | 8.181361846              | 14.7017376      | 5.976907176                 | 5.340054305       | 3.334191029        |
| 258528_at           | AT3G06770 | 1.969014026                       | 2.211526229              | 6.831088113     | 2.370973788                 | 1.576855479       | 1.295757211        |
| 259228_at           | AT3G07720 | 2.318836363                       | 1.685740749              | 7.394423053     | 3.759318894                 | 1.798639601       | 1.202688702        |
| 258676_at           | AT3G08600 | 1.309685641                       | 1.521148769              | 2.969187187     | 1.576360629                 | 1.621705172       | 1.100401763        |

**Supplementary Tables pertaining to Figure 3**

**Supplementary Table S19. Loci enriched in individual cell types from microarray data**

**Loci enriched in Cortex (CORTEX) from micorarray expression data analysis (1.7 fold, p <0.5)**

| Affymetrix Probeset | Locus     | Mean Microarray Expression Values |                          |                 |                             |                   |                    |
|---------------------|-----------|-----------------------------------|--------------------------|-----------------|-----------------------------|-------------------|--------------------|
|                     |           | Root Hairs (COBL9)                | Non-Hair Epidermis (WER) | Cortex (CORTEX) | Endodermis/ Quiescent (SCR) | Vasculature (WOL) | Columella (PET111) |
| 258704_at           | AT3G09780 | 0.79064283                        | 0.8166269                | 2.112063812     | 0.868915671                 | 0.821731138       | 0.639359865        |
| 258920_at           | AT3G10520 | 0.820477938                       | 0.885779122              | 2.501134763     | 0.657561043                 | 0.634876121       | 0.630453237        |
| 256415_at           | AT3G11210 | 0.631719174                       | 0.586757044              | 3.221835839     | 0.863335104                 | 0.72263032        | 0.696794559        |
| 256252_at           | AT3G11340 | 6.346121203                       | 1.413856343              | 14.86219836     | 5.023665154                 | 1.259838278       | 1.795422773        |
| 257697_at           | AT3G12700 | 1.809109107                       | 0.620402776              | 9.738818367     | 1.817562516                 | 0.916124509       | 0.797635871        |
| 256962_at           | AT3G13560 | 0.779263865                       | 1.631524423              | 2.980246803     | 1.460184789                 | 1.747735833       | 1.260879704        |
| 258094_at           | AT3G14690 | 1.231267042                       | 0.475561942              | 4.429317681     | 1.019558694                 | 0.829171059       | 2.184435845        |
| 256600_at           | AT3G14850 | 2.775037668                       | 0.852996362              | 8.847785677     | 2.356366521                 | 1.710281553       | 0.831765942        |
| 258393_at           | AT3G15480 | 4.646061545                       | 4.50439677               | 8.223462616     | 4.31376773                  | 3.896139199       | 4.754284573        |
| 257651_at           | AT3G16850 | 1.483875777                       | 2.027173057              | 4.102105022     | 1.758705709                 | 1.322863658       | 0.855233875        |
| 257892_at           | AT3G17020 | 6.636383267                       | 1.522093943              | 17.0498969      | 8.747110435                 | 3.143649554       | 3.532719359        |
| 257805_at           | AT3G18830 | 1.34324893                        | 1.64336696               | 13.68811705     | 4.180333951                 | 2.117462641       | 1.783143864        |
| 257143_at           | AT3G20110 | 0.554950802                       | 0.377664545              | 1.587862196     | 0.395864837                 | 0.399220881       | 0.384872046        |
| 257112_at           | AT3G20120 | 0.458365052                       | 0.509032668              | 2.197305951     | 0.894688891                 | 0.884710103       | 0.686185285        |
| 256697_at           | AT3G20660 | 1.236200352                       | 1.22305572               | 3.293117131     | 1.610863292                 | 1.436169842       | 1.019394487        |
| 258038_at           | AT3G21260 | 0.742024421                       | 0.700138595              | 1.769876237     | 0.836459917                 | 0.6374461         | 0.6188785          |
| 258167_at           | AT3G21560 | 0.799468771                       | 1.425102088              | 5.979060129     | 2.165510388                 | 1.183865714       | 0.654081823        |
| 258181_at           | AT3G21670 | 0.757204406                       | 0.554409667              | 3.831240073     | 0.694108277                 | 0.712599711       | 0.58003657         |
| 258295_at           | AT3G23400 | 3.287482322                       | 1.223618776              | 7.78659148      | 3.367357044                 | 1.458731479       | 3.693709343        |
| 257253_at           | AT3G24190 | 1.725258118                       | 0.928757829              | 3.681330772     | 1.960133571                 | 1.058982078       | 1.21016207         |
| 257628_at           | AT3G26290 | 0.543362796                       | 0.442975603              | 1.838623129     | 0.697440756                 | 0.742885424       | 0.680981497        |
| 256870_at           | AT3G26300 | 0.379357182                       | 0.356935443              | 3.782104545     | 0.841432109                 | 0.523757293       | 0.46056891         |
| 256880_at           | AT3G26450 | 0.392843018                       | 0.382632358              | 2.077085708     | 0.747525737                 | 0.562215431       | 0.422144853        |
| 256877_at           | AT3G26470 | 2.861452828                       | 0.668348136              | 5.331058249     | 1.077687643                 | 0.743819263       | 0.664638591        |
| 257834_at           | AT3G26720 | 1.571369967                       | 1.918733848              | 7.727951091     | 3.290928571                 | 2.891001076       | 1.972100925        |
| 256751_at           | AT3G27170 | 1.142634616                       | 0.527507688              | 3.779370527     | 0.896799963                 | 0.759605741       | 0.640860966        |
| 258244_at           | AT3G27770 | 9.797369075                       | 6.615175982              | 16.7550204      | 6.161142218                 | 4.561004953       | 3.966366457        |
| 256848_at           | AT3G27960 | 3.546451207                       | 2.052544053              | 6.218384835     | 3.14697836                  | 2.781509309       | 3.324526555        |
| 257297_at           | AT3G28040 | 1.019160117                       | 0.693676459              | 3.798845387     | 1.617896247                 | 0.857157763       | 0.797149713        |
| 257272_at           | AT3G28130 | 0.462924687                       | 0.467919043              | 2.260640262     | 0.77063815                  | 0.668039081       | 0.472883207        |
| 257071_at           | AT3G28180 | 5.748690649                       | 5.361596889              | 10.93208972     | 6.324315146                 | 3.950876187       | 3.363031816        |

**Supplementary Tables pertaining to Figure 3**

**Supplementary Table S19. Loci enriched in individual cell types from microarray data**

**Loci enriched in Cortex (CORTEX) from micorarray expression data analysis (1.7 fold, p <0.5)**

| Affymetrix Probeset | Locus     | Mean Microarray Expression Values |                          |                 |                             |                   |                    |
|---------------------|-----------|-----------------------------------|--------------------------|-----------------|-----------------------------|-------------------|--------------------|
|                     |           | Root Hairs (COBL9)                | Non-Hair Epidermis (WER) | Cortex (CORTEX) | Endodermis/ Quiescent (SCR) | Vasculature (WOL) | Columella (PET111) |
| 256736_at           | AT3G29410 | 0.57291624                        | 0.494245008              | 1.753767216     | 0.713848107                 | 0.609959724       | 0.605061767        |
| 252677_at           | AT3G44320 | 4.638662606                       | 5.447829639              | 15.55993847     | 7.328571386                 | 2.415082908       | 5.478648862        |
| 252652_at           | AT3G44720 | 0.880422471                       | 0.568604013              | 2.047778879     | 1.1648736                   | 1.063704182       | 0.883950996        |
| 252607_at           | AT3G44990 | 0.500715528                       | 0.407827371              | 8.32285762      | 0.985149606                 | 1.053035433       | 0.695329449        |
| 252570_at           | AT3G45300 | 2.803885743                       | 1.81697138               | 5.928903343     | 3.064232238                 | 2.179285732       | 2.309204882        |
| 252537_at           | AT3G45710 | 1.869000514                       | 0.586160181              | 4.606009687     | 0.973038717                 | 1.277365137       | 0.903439519        |
| 252430_at           | AT3G47470 | 0.486306255                       | 0.983525775              | 2.845424946     | 1.533050542                 | 1.021233999       | 0.77255356         |
| 252397_at           | AT3G47980 | 0.843144563                       | 0.780586005              | 2.48858078      | 1.17751876                  | 0.959460121       | 1.0473664          |
| 252123_at           | AT3G51240 | 4.200997034                       | 11.39649526              | 34.37580776     | 13.78245856                 | 6.455338809       | 4.100865445        |
| 246302_at           | AT3G51860 | 0.724866694                       | 0.640200424              | 3.037851443     | 1.187940843                 | 0.849938142       | 0.751793766        |
| 251827_at           | AT3G55120 | 1.624399587                       | 1.346340497              | 11.80700383     | 2.329539304                 | 1.659242492       | 1.335801405        |
| 251713_at           | AT3G56080 | 0.457045755                       | 0.394648529              | 0.907155293     | 0.519365015                 | 0.522118007       | 0.503972546        |
| 251722_at           | AT3G56200 | 2.138852137                       | 1.309328999              | 6.457500937     | 2.184228467                 | 1.274662677       | 1.621437226        |
| 251664_at           | AT3G56940 | 1.001171405                       | 0.70492436               | 2.586937521     | 1.103413716                 | 1.108029269       | 1.075398987        |
| 251503_at           | AT3G59140 | 0.943210129                       | 1.089488182              | 4.661612832     | 1.572705633                 | 0.879318524       | 0.627142301        |
| 251309_at           | AT3G61220 | 2.156416177                       | 0.668230725              | 3.883029592     | 1.718117272                 | 1.211080154       | 1.977362499        |
| 251287_at           | AT3G61820 | 2.728155667                       | 0.9344278                | 5.378611696     | 2.155597328                 | 1.707796526       | 1.458130299        |
| 251272_at           | AT3G61890 | 0.459072584                       | 0.446373398              | 2.274337474     | 1.314638631                 | 0.572440032       | 0.788958492        |
| 251146_at           | AT3G63520 | 1.611974919                       | 1.102752982              | 6.020767502     | 3.210264561                 | 1.2985248         | 1.372813022        |
| 255674_at           | AT4G00430 | 11.44032355                       | 11.69859495              | 20.82051136     | 12.15689023                 | 7.963458362       | 4.674411957        |
| 255630_at           | AT4G00700 | 1.353675553                       | 0.594369096              | 3.294617935     | 0.968730339                 | 0.984776143       | 0.867762224        |
| 255502_at           | AT4G02410 | 0.842441175                       | 0.478298055              | 1.823070613     | 0.706029529                 | 0.61705555        | 0.580330562        |
| 255413_at           | AT4G03140 | 0.986783538                       | 0.909938742              | 2.87345199      | 1.345478721                 | 1.200529532       | 0.896902953        |
| 255435_at           | AT4G03280 | 0.43092088                        | 0.425834992              | 1.108477158     | 0.561387936                 | 0.619722344       | 0.536287874        |
| 255428_at           | AT4G03390 | 2.066216324                       | 2.821789456              | 6.34596598      | 2.575950147                 | 2.58950171        | 3.082631547        |
| 255290_at           | AT4G04640 | 0.627180515                       | 0.60992837               | 3.116051034     | 1.3006218                   | 1.001263775       | 1.041623008        |
| 255294_at           | AT4G04750 | 0.570595262                       | 0.46953772               | 1.808905151     | 0.557809379                 | 0.589072185       | 0.561360467        |
| 255310_at           | AT4G04955 | 1.793037802                       | 1.846352199              | 5.186833952     | 1.551844744                 | 1.052198938       | 0.855673311        |
| 255103_at           | AT4G08690 | 3.179464187                       | 2.315551856              | 6.622282719     | 3.175373615                 | 1.601286359       | 1.058320979        |
| 254998_at           | AT4G09760 | 0.444358528                       | 0.39812369               | 1.781357876     | 0.60477217                  | 0.547179727       | 0.503687063        |
| 254970_at           | AT4G10340 | 0.816008905                       | 0.654123248              | 2.568082238     | 1.335566664                 | 1.014971793       | 1.006806346        |



**Supplementary Tables pertaining to Figure 3**

**Supplementary Table S19. Loci enriched in individual cell types from microarray data**

**Loci enriched in Cortex (CORTEX) from micorarray expression data analysis (1.7 fold, p <0.5)**

| Affymetrix Probeset | Locus     | Mean Microarray Expression Values |                          |                 |                             |                   |                    |
|---------------------|-----------|-----------------------------------|--------------------------|-----------------|-----------------------------|-------------------|--------------------|
|                     |           | Root Hairs (COBL9)                | Non-Hair Epidermis (WER) | Cortex (CORTEX) | Endodermis/ Quiescent (SCR) | Vasculature (WOL) | Columella (PET111) |
| 254996_at           | AT4G10390 | 0.793552696                       | 0.59000051               | 4.367346089     | 1.694749047                 | 1.018964454       | 1.759377938        |
| 254924_at           | AT4G11330 | 0.871143427                       | 0.810288342              | 1.571494339     | 0.829590674                 | 0.75659671        | 0.582104854        |
| 254848_at           | AT4G11960 | 0.811304927                       | 0.541949017              | 1.643704588     | 0.920365074                 | 0.865155258       | 0.846866811        |
| 254816_at           | AT4G12440 | 0.425045674                       | 0.416307284              | 1.808128812     | 0.745792654                 | 0.781142446       | 0.578346665        |
| 254818_at           | AT4G12470 | 1.171825722                       | 0.973035326              | 5.807703714     | 1.291303903                 | 0.869535307       | 0.680345135        |
| 254795_at           | AT4G12990 | 0.856102191                       | 0.583122852              | 1.78375825      | 0.84740254                  | 0.855100069       | 0.876428849        |
| 245274_at           | AT4G14360 | 3.499391618                       | 3.336129291              | 6.838598982     | 3.660512262                 | 3.987210818       | 2.372299844        |
| 245555_at           | AT4G15390 | 1.359321572                       | 3.004604255              | 20.95164164     | 4.731138149                 | 2.580138936       | 1.88676167         |
| 245560_at           | AT4G15480 | 0.605787119                       | 0.658675187              | 2.901730316     | 0.711118799                 | 0.631468393       | 0.531561253        |
| 245439_at           | AT4G16670 | 0.799012425                       | 1.665231617              | 3.323027134     | 0.747267114                 | 0.917597733       | 0.938840733        |
| 254651_at           | AT4G18160 | 1.613072296                       | 1.255328228              | 5.638630859     | 2.579975701                 | 1.516599155       | 1.756575611        |
| 254630_at           | AT4G18360 | 0.576257218                       | 0.527075562              | 5.065594153     | 2.646667624                 | 1.312830113       | 0.655002869        |
| 254430_at           | AT4G20820 | 0.39926989                        | 0.376902171              | 1.089928905     | 0.447274485                 | 0.506637135       | 0.512145208        |
| 254225_at           | AT4G23670 | 0.355026665                       | 0.340376958              | 12.50339102     | 2.665148018                 | 3.228182024       | 1.165990829        |
| 254187_at           | AT4G23890 | 0.532306517                       | 0.484309195              | 1.594001139     | 0.605081729                 | 0.69606383        | 0.715016607        |
| 254098_at           | AT4G25100 | 1.203020841                       | 0.459043616              | 5.991879297     | 2.582019206                 | 0.992577185       | 0.642829159        |
| 254077_at           | AT4G25640 | 2.902819511                       | 2.887716407              | 5.650059052     | 2.178627262                 | 1.15586583        | 0.848207209        |
| 254041_at           | AT4G25830 | 1.361239386                       | 1.16617595               | 3.643981425     | 1.545474809                 | 1.218265677       | 0.590881114        |
| 253985_at           | AT4G26220 | 2.20320456                        | 0.632521948              | 5.0652326       | 1.327349662                 | 1.397473322       | 1.51447243         |
| 253925_at           | AT4G26690 | 2.563950545                       | 2.595984962              | 4.575011234     | 2.344163749                 | 1.421994569       | 1.880742464        |
| 253872_at           | AT4G27410 | 4.090311878                       | 0.845306227              | 11.14124399     | 5.45962981                  | 3.162904945       | 3.217253517        |
| 253825_at           | AT4G28025 | 2.265075168                       | 1.415571526              | 4.226999151     | 2.441233347                 | 1.934301074       | 2.391528053        |
| 253829_at           | AT4G28040 | 3.190648807                       | 1.181712395              | 12.26114733     | 2.190903337                 | 1.30711066        | 0.936171566        |
| 253720_at           | AT4G29270 | 4.108972103                       | 3.838760598              | 8.246197306     | 2.28219531                  | 1.507035148       | 0.903031714        |
| 253697_at           | AT4G29700 | 0.444892999                       | 0.571018052              | 3.891843818     | 1.710586866                 | 0.662093741       | 0.5824772          |
| 253702_at           | AT4G29900 | 3.509218264                       | 2.205229123              | 6.0741352       | 3.352678605                 | 1.707911284       | 2.948160349        |
| 253666_at           | AT4G30270 | 0.719905029                       | 0.511302058              | 7.86529191      | 3.769603634                 | 0.835654449       | 0.631473406        |
| 253618_at           | AT4G30420 | 0.783858924                       | 0.781455153              | 11.93551126     | 2.178121473                 | 1.037546112       | 0.80400246         |
| 253601_at           | AT4G30900 | 1.731915139                       | 1.422705227              | 4.626716434     | 2.031926399                 | 2.014004638       | 1.572174705        |
| 253437_at           | AT4G32460 | 2.717529346                       | 4.274189908              | 15.62432832     | 4.092833801                 | 7.59837955        | 1.608788735        |
| 253358_at           | AT4G32940 | 4.121400765                       | 1.918608111              | 7.803208986     | 4.080856053                 | 2.292341693       | 3.700767143        |

**Supplementary Tables pertaining to Figure 3**

**Supplementary Table S19. Loci enriched in individual cell types from microarray data**

**Loci enriched in Cortex (CORTEX) from micorarray expression data analysis (1.7 fold, p <0.5)**

| Affymetrix Probeset | Locus     | Mean Microarray Expression Values |                          |                 |                             |                   |                    |
|---------------------|-----------|-----------------------------------|--------------------------|-----------------|-----------------------------|-------------------|--------------------|
|                     |           | Root Hairs (COBL9)                | Non-Hair Epidermis (WER) | Cortex (CORTEX) | Endodermis/ Quiescent (SCR) | Vasculature (WOL) | Columella (PET111) |
| 253387_at           | AT4G33010 | 1.491235506                       | 2.024087845              | 6.028427005     | 3.415629369                 | 2.10085724        | 1.273654203        |
| 253414_at           | AT4G33050 | 0.610046355                       | 0.43444913               | 1.631023771     | 0.729033502                 | 0.661761417       | 0.562767767        |
| 253373_at           | AT4G33150 | 1.019518077                       | 0.70372866               | 9.003011675     | 3.7882858                   | 1.140265036       | 3.78190707         |
| 253172_at           | AT4G35060 | 2.281249957                       | 1.907496088              | 9.657649975     | 5.33752315                  | 2.279436606       | 1.035130635        |
| 253197_at           | AT4G35250 | 0.594619432                       | 0.661316165              | 1.510960779     | 0.848618055                 | 0.718681166       | 0.755452054        |
| 253139_at           | AT4G35450 | 5.428911318                       | 5.411211786              | 10.04543815     | 5.45138129                  | 4.682918491       | 3.812108874        |
| 253104_at           | AT4G36010 | 3.80304823                        | 1.437332144              | 9.635091747     | 4.050674405                 | 1.541865366       | 3.866162576        |
| 246238_at           | AT4G36670 | 0.568200318                       | 0.559041037              | 3.442770502     | 0.703754563                 | 0.756127171       | 0.613113909        |
| 246197_at           | AT4G37010 | 1.173471147                       | 0.520990434              | 2.319107169     | 0.977106549                 | 0.54866939        | 0.381916443        |
| 253052_at           | AT4G37310 | 0.992299642                       | 0.581776267              | 1.870099609     | 0.75844364                  | 0.785961033       | 0.625060194        |
| 253039_at           | AT4G37760 | 1.260776439                       | 0.682391659              | 2.807832756     | 0.865628615                 | 0.850126448       | 1.098234093        |
| 252921_at           | AT4G39030 | 1.218514007                       | 1.407389315              | 7.003809936     | 4.019416142                 | 1.290760324       | 1.387069953        |
| 252886_at           | AT4G39350 | 3.554298594                       | 2.497285798              | 13.55298221     | 7.854158732                 | 4.56530183        | 3.686884442        |
| 251108_at           | AT5G01620 | 1.704538009                       | 2.204392437              | 6.562049992     | 3.123667585                 | 2.473395123       | 1.706030449        |
| 251079_at           | AT5G02000 | 1.089982119                       | 1.29420032               | 2.59661036      | 0.841602594                 | 0.925023594       | 1.035250186        |
| 251026_at           | AT5G02200 | 0.714579934                       | 0.684301731              | 1.548364258     | 0.835636818                 | 0.762263092       | 0.800217622        |
| 251012_at           | AT5G02580 | 0.504103425                       | 0.903653766              | 1.821868389     | 0.637654293                 | 0.619419796       | 0.536058942        |
| 250967_at           | AT5G02790 | 0.646446423                       | 0.602205388              | 4.423474693     | 1.302042408                 | 0.802731987       | 1.535753845        |
| 250952_at           | AT5G03570 | 0.795446755                       | 0.547953739              | 3.17558234      | 0.758990688                 | 0.777163229       | 0.727569935        |
| 250892_at           | AT5G03760 | 3.079026346                       | 3.390364747              | 6.951849389     | 1.319919456                 | 1.794723343       | 1.309648745        |
| 250868_at           | AT5G03860 | 0.496188472                       | 0.573808707              | 3.087789526     | 0.815536156                 | 0.826471808       | 0.725850922        |
| 245706_at           | AT5G04310 | 1.035662732                       | 0.520743589              | 2.045141273     | 1.032333476                 | 1.175797406       | 1.017236513        |
| 250842_at           | AT5G04490 | 0.719598301                       | 0.550199912              | 1.474619116     | 0.750926539                 | 0.657407755       | 0.61692438         |
| 250794_at           | AT5G05270 | 3.069043192                       | 5.126667154              | 19.02552963     | 4.469938742                 | 5.649868792       | 2.396865144        |
| 250747_at           | AT5G05900 | 2.244598063                       | 0.845706006              | 4.254650906     | 0.82345117                  | 0.6585501         | 0.914946869        |
| 250620_at           | AT5G07190 | 0.557591922                       | 0.493693523              | 5.532789409     | 0.519805563                 | 0.618963367       | 0.601467993        |
| 250558_at           | AT5G07990 | 0.817240809                       | 0.621390615              | 5.537829487     | 0.927530283                 | 0.703498577       | 0.630117798        |
| 250533_at           | AT5G08640 | 5.697377688                       | 5.483939799              | 20.16961378     | 7.064411954                 | 3.828712111       | 2.090230529        |
| 245895_at           | AT5G09230 | 1.9755525                         | 1.276627682              | 3.746682923     | 2.17310125                  | 1.692114522       | 1.435730366        |
| 250505_at           | AT5G09870 | 3.091843608                       | 2.22142498               | 5.805584102     | 1.879344731                 | 1.672442511       | 1.58490765         |
| 250480_at           | AT5G10290 | 1.579830831                       | 0.931452756              | 2.793790834     | 1.547568977                 | 1.012536538       | 1.376206309        |

**Supplementary Tables pertaining to Figure 3**

**Supplementary Table S19. Loci enriched in individual cell types from microarray data**

**Loci enriched in Cortex (CORTEX) from micorarray expression data analysis (1.7 fold, p <0.5)**

| Affymetrix Probeset | Locus     | Mean Microarray Expression Values |                          |                 |                             |                   |                    |
|---------------------|-----------|-----------------------------------|--------------------------|-----------------|-----------------------------|-------------------|--------------------|
|                     |           | Root Hairs (COBL9)                | Non-Hair Epidermis (WER) | Cortex (CORTEX) | Endodermis/ Quiescent (SCR) | Vasculature (WOL) | Columella (PET111) |
| 250366_at           | AT5G11420 | 1.134856794                       | 0.96292213               | 10.07281927     | 0.735457235                 | 1.165499993       | 0.776905949        |
| 245980_at           | AT5G13140 | 0.612394865                       | 0.445352096              | 1.430677029     | 0.610055084                 | 0.694897283       | 0.75905667         |
| 250243_at           | AT5G13630 | 0.540494661                       | 0.596113404              | 4.754373933     | 1.752856234                 | 0.952715019       | 0.634612354        |
| 250207_at           | AT5G13930 | 9.300064835                       | 9.359752947              | 49.91365045     | 24.94674102                 | 13.9821612        | 6.114794907        |
| 250157_at           | AT5G15180 | 2.046703278                       | 0.595926653              | 6.413619146     | 1.352173854                 | 1.311270246       | 1.012203765        |
| 246510_at           | AT5G15410 | 0.968505086                       | 0.788216969              | 2.82287564      | 1.116763255                 | 0.937535215       | 0.787533399        |
| 246466_at           | AT5G17010 | 2.010893533                       | 1.509030319              | 4.361505523     | 2.523777957                 | 1.776894206       | 1.396664904        |
| 246468_at           | AT5G17050 | 4.225996321                       | 3.499423542              | 9.330022711     | 4.080543881                 | 2.317333195       | 2.104542225        |
| 246432_at           | AT5G17490 | 0.501675556                       | 0.53131599               | 1.694261964     | 0.757419867                 | 0.745728639       | 0.836959816        |
| 249955_at           | AT5G18840 | 0.663222418                       | 0.558529854              | 1.744949075     | 0.623656963                 | 0.691782209       | 0.687669583        |
| 249964_at           | AT5G19010 | 3.009997229                       | 2.450217973              | 7.39410655      | 2.917302093                 | 2.555544693       | 3.38891821         |
| 246144_at           | AT5G20110 | 2.231492801                       | 1.851231006              | 4.403221884     | 2.378429197                 | 0.890218996       | 2.550171567        |
| 249942_at           | AT5G22300 | 0.655383118                       | 0.881816625              | 2.99827689      | 0.717143893                 | 0.756678361       | 0.765795299        |
| 249848_at           | AT5G23220 | 1.659449964                       | 0.679492696              | 3.060237541     | 1.71626304                  | 0.719350893       | 0.687682194        |
| 249765_at           | AT5G24030 | 1.373544583                       | 1.396952623              | 2.516158936     | 1.31886434                  | 1.310380649       | 1.447498451        |
| 246977_at           | AT5G24930 | 5.143708525                       | 4.376127519              | 10.71272472     | 6.142180138                 | 2.816034742       | 2.970005614        |
| 246919_at           | AT5G25460 | 11.16160909                       | 8.77162943               | 20.63133222     | 8.494448001                 | 2.946450635       | 1.090401842        |
| 246831_at           | AT5G26340 | 3.216815436                       | 0.877540927              | 6.435360154     | 1.154155426                 | 0.940253978       | 0.795110068        |
| 246781_at           | AT5G27350 | 0.829787681                       | 0.47493865               | 2.308790255     | 0.860832902                 | 0.679546995       | 0.584848894        |
| 246778_at           | AT5G27450 | 4.771760699                       | 4.100219201              | 10.71439269     | 4.283248654                 | 2.682740189       | 1.705503452        |
| 246756_at           | AT5G27930 | 1.906412665                       | 0.964006262              | 4.254888559     | 1.256337813                 | 0.882471435       | 0.798935489        |
| 249567_at           | AT5G38020 | 1.010526428                       | 0.626481926              | 4.71284127      | 0.904116617                 | 1.165007997       | 0.951059627        |
| 249545_at           | AT5G38030 | 0.637458984                       | 0.50689125               | 2.49089514      | 0.745778851                 | 0.70117342        | 0.517737262        |
| 249393_at           | AT5G40170 | 0.800327386                       | 0.474794847              | 1.721389224     | 0.666204341                 | 0.583218021       | 0.577249048        |
| 249235_at           | AT5G42100 | 0.976040027                       | 2.203564533              | 4.551996787     | 1.986046147                 | 2.383147134       | 2.358720477        |
| 249242_at           | AT5G42250 | 1.845044357                       | 0.744966702              | 16.90788213     | 3.506068963                 | 1.974847647       | 1.042605421        |
| 249244_at           | AT5G42270 | 1.976139884                       | 1.286632764              | 4.656806482     | 2.295613199                 | 1.549796542       | 1.545750143        |
| 249203_at           | AT5G42590 | 3.435985794                       | 3.83286943               | 14.13659528     | 3.051552934                 | 2.247653574       | 2.933618155        |
| 249205_at           | AT5G42600 | 1.931690787                       | 2.551463971              | 11.86896933     | 3.096468306                 | 2.83559183        | 1.176261319        |
| 249103_at           | AT5G43600 | 1.45051364                        | 1.149183091              | 5.262393229     | 2.102404475                 | 1.347563472       | 1.106460077        |
| 249037_at           | AT5G44130 | 2.132547719                       | 0.921515028              | 6.24094774      | 2.122661837                 | 1.985625531       | 1.084080766        |

**Supplementary Tables pertaining to Figure 3**

**Supplementary Table S19. Loci enriched in individual cell types from microarray data**

**Loci enriched in Cortex (CORTEX) from micorarray expression data analysis (1.7 fold, p <0.5)**

| Affymetrix Probeset | Locus     | Mean Microarray Expression Values |                          |                 |                             |                   |                    |
|---------------------|-----------|-----------------------------------|--------------------------|-----------------|-----------------------------|-------------------|--------------------|
|                     |           | Root Hairs (COBL9)                | Non-Hair Epidermis (WER) | Cortex (CORTEX) | Endodermis/ Quiescent (SCR) | Vasculature (WOL) | Columella (PET111) |
| 249034_at           | AT5G44160 | 0.43816626                        | 0.430684946              | 2.275509032     | 0.754502579                 | 0.891342353       | 0.582225762        |
| 249035_at           | AT5G44190 | 0.577646999                       | 0.583526784              | 1.621380467     | 0.810497196                 | 0.845417595       | 0.824134877        |
| 248932_at           | AT5G46050 | 0.767504216                       | 0.533285686              | 2.318680461     | 0.687909979                 | 0.700593946       | 0.629634999        |
| 248886_at           | AT5G46110 | 0.866046175                       | 0.613972625              | 1.635685609     | 0.658368349                 | 0.668442712       | 0.840708411        |
| 248828_at           | AT5G47110 | 0.730382051                       | 1.38093279               | 5.203136127     | 1.758700235                 | 1.637598696       | 1.430988834        |
| 248793_at           | AT5G47240 | 0.606676641                       | 0.519557356              | 3.51390429      | 1.60074753                  | 0.690628437       | 0.599591632        |
| 248756_at           | AT5G47560 | 0.810659998                       | 0.678149934              | 1.560908953     | 0.846619824                 | 0.760995431       | 0.684557227        |
| 248769_at           | AT5G47730 | 1.873276181                       | 1.54533299               | 3.540497902     | 2.006353793                 | 1.141848509       | 1.678115326        |
| 248721_at           | AT5G47780 | 4.025603692                       | 3.75709252               | 9.13445452      | 3.964206144                 | 4.895757928       | 4.50974499         |
| 248727_at           | AT5G47990 | 6.029509297                       | 5.543670779              | 17.91563173     | 4.243748523                 | 3.50497808        | 3.256296316        |
| 248728_at           | AT5G48000 | 3.608589407                       | 5.327649406              | 19.25690779     | 3.933805252                 | 3.561083799       | 2.209323522        |
| 248729_at           | AT5G48010 | 4.693808184                       | 3.117617073              | 15.69713737     | 3.01029334                  | 2.53981818        | 1.240439942        |
| 248625_at           | AT5G48880 | 0.559471197                       | 0.586753866              | 13.47556429     | 1.836359331                 | 1.593518704       | 0.84012408         |
| 248622_at           | AT5G49360 | 0.878638782                       | 5.681645661              | 16.05268241     | 3.052716898                 | 2.54932879        | 1.204622448        |
| 248371_at           | AT5G51810 | 0.538149099                       | 0.471894985              | 1.762515317     | 0.553633008                 | 0.65103063        | 0.578608417        |
| 248335_at           | AT5G52450 | 0.796807275                       | 0.632398262              | 3.499261509     | 0.953432198                 | 1.134206132       | 0.93409331         |
| 248263_at           | AT5G53370 | 1.593318603                       | 0.704387463              | 11.77747362     | 2.671438623                 | 1.882051089       | 0.99679307         |
| 248232_at           | AT5G53760 | 1.979333422                       | 3.167398477              | 5.541427887     | 1.356166726                 | 0.940186744       | 2.722494216        |
| 247954_at           | AT5G56870 | 6.324137987                       | 0.8737201                | 23.97994544     | 5.129911415                 | 4.386951143       | 3.015195937        |
| 247813_at           | AT5G58330 | 0.670614016                       | 0.561880614              | 1.646323761     | 0.664300817                 | 0.704414368       | 0.689398253        |
| 247774_at           | AT5G58660 | 0.506873234                       | 0.454840323              | 1.479543675     | 0.574148488                 | 0.565239204       | 0.577818919        |
| 247729_at           | AT5G59530 | 0.448417117                       | 0.349756413              | 1.066221558     | 0.420287899                 | 0.41014099        | 0.372135622        |
| 247679_at           | AT5G59540 | 0.811025267                       | 0.515604376              | 7.331189108     | 1.876244302                 | 1.246997613       | 0.861257479        |
| 247628_at           | AT5G60400 | 0.42212126                        | 0.437006928              | 1.282977226     | 0.717728007                 | 0.675613021       | 0.429879166        |
| 247586_at           | AT5G60660 | 11.61316747                       | 12.06920032              | 26.50731566     | 11.42079467                 | 8.764706916       | 9.880465229        |
| 247577_at           | AT5G61290 | 0.632969187                       | 0.507628832              | 1.48591944      | 0.697217448                 | 0.716578758       | 0.725704911        |
| 247463_at           | AT5G62210 | 0.62724778                        | 0.816066861              | 8.356162566     | 0.605821194                 | 0.93511104        | 0.901398295        |
| 247288_at           | AT5G64330 | 0.391748722                       | 0.491739374              | 6.536666355     | 1.635139925                 | 2.087908793       | 0.872846172        |
| 247246_at           | AT5G64620 | 1.23836272                        | 0.691085923              | 8.398271328     | 1.578637163                 | 1.559139233       | 1.769672235        |
| 247193_at           | AT5G65380 | 1.438931414                       | 0.909419571              | 11.77111884     | 1.208310742                 | 1.174031958       | 0.828526261        |
| 247107_at           | AT5G66040 | 1.421811696                       | 0.694020661              | 3.704976495     | 1.498156419                 | 1.242150676       | 0.956055677        |

**Supplementary Tables pertaining to Figure 3**

**Supplementary Table S19. Loci enriched in individual cell types from microarray data**

**Loci enriched in Cortex (CORTEX) from micorarray expression data analysis (1.7 fold, p <0.5)**

| Affymetrix Probeset | Locus     | Mean Microarray Expression Values |                          |                 |                             |                   |                    |
|---------------------|-----------|-----------------------------------|--------------------------|-----------------|-----------------------------|-------------------|--------------------|
|                     |           | Root Hairs (COBL9)                | Non-Hair Epidermis (WER) | Cortex (CORTEX) | Endodermis/ Quiescent (SCR) | Vasculature (WOL) | Columella (PET111) |
| 247085_at           | AT5G66310 | 1.217699395                       | 1.366353905              | 3.92249461      | 1.794836815                 | 1.217321453       | 1.466218942        |
| 247073_at           | AT5G66570 | 0.725896012                       | 0.631093653              | 1.577160684     | 0.876082446                 | 0.887836359       | 0.754461479        |
| 246992_at           | AT5G67430 | 0.549205984                       | 0.490807116              | 1.284054337     | 0.6349561                   | 0.650604879       | 0.594439644        |

**Supplementary Tables pertaining to Figure 3**

**Supplementary Table S19. Loci enriched in individual cell types from microarray data**

**Loci enriched in Endodermis/Quiescent Center (SCR) from micorarray expression data analysis (1.7 fold, p <0.5)**

| Affymetrix Probeset | Locus     | Mean Microarray Expression Values |                          |                 |                             |                   |                    |
|---------------------|-----------|-----------------------------------|--------------------------|-----------------|-----------------------------|-------------------|--------------------|
|                     |           | Root Hairs (COBL9)                | Non-Hair Epidermis (WER) | Cortex (CORTEX) | Endodermis/ Quiescent (SCR) | Vasculature (WOL) | Columella (PET111) |
| 261570_at           | AT1G01120 | 3.534819684                       | 0.66148798               | 1.63515887      | 18.18279182                 | 1.543182008       | 0.894852168        |
| 261027_at           | AT1G01340 | 0.67469246                        | 0.516004776              | 1.009846346     | 1.846024088                 | 0.716621904       | 0.727804709        |
| 259439_at           | AT1G01480 | 1.092234102                       | 0.872007756              | 0.917070533     | 6.87229871                  | 1.167099495       | 1.029479358        |
| 264146_at           | AT1G02205 | 0.733316824                       | 0.570881836              | 0.633230261     | 1.58085201                  | 0.738467635       | 0.803963188        |
| 262131_at           | AT1G02900 | 3.639268038                       | 0.748432845              | 5.489194085     | 16.70848855                 | 3.41676537        | 1.579225171        |
| 264416_at           | AT1G02980 | 0.531867055                       | 0.703332657              | 0.624480761     | 2.928843953                 | 0.812918056       | 0.736331163        |
| 263117_at           | AT1G03040 | 0.479970422                       | 0.634713895              | 1.218542251     | 2.252338423                 | 0.936044082       | 0.93543315         |
| 265038_at           | AT1G03920 | 0.839665417                       | 0.698522714              | 0.745227452     | 18.02192738                 | 1.342498382       | 1.349355982        |
| 264606_at           | AT1G04660 | 0.792632912                       | 0.679298364              | 0.751438161     | 3.71930566                  | 0.981478137       | 1.042022723        |
| 264577_at           | AT1G05260 | 0.564368249                       | 0.560940597              | 2.659246989     | 40.82502385                 | 5.410111954       | 2.730636285        |
| 262635_at           | AT1G06570 | 1.447364986                       | 0.65157245               | 1.861733094     | 4.397316498                 | 1.249620797       | 1.077713165        |
| 256053_at           | AT1G07260 | 0.677741803                       | 0.588642399              | 0.539987023     | 2.586785134                 | 1.466633461       | 0.742987713        |
| 261815_at           | AT1G08320 | 1.669307478                       | 0.867218111              | 2.726123648     | 4.98506066                  | 1.331364617       | 1.015699154        |
| 264794_at           | AT1G08670 | 0.395801076                       | 0.36819443               | 0.406090232     | 5.448707531                 | 0.728761343       | 0.430453214        |
| 264648_at           | AT1G09080 | 0.436896383                       | 0.375713223              | 0.600268969     | 1.682396888                 | 0.475670217       | 0.664605421        |
| 264647_at           | AT1G09090 | 0.375951847                       | 0.35734333               | 3.83001105      | 11.17383152                 | 0.806006425       | 0.507661831        |
| 264462_at           | AT1G10200 | 1.907887458                       | 2.507989504              | 3.226945323     | 6.336914595                 | 3.524692315       | 1.6596584          |
| 262478_at           | AT1G11170 | 0.629324364                       | 0.557530558              | 0.734008613     | 1.653840804                 | 0.72885868        | 0.951867602        |
| 262819_at           | AT1G11600 | 0.529071602                       | 0.461036554              | 0.478774763     | 2.337332107                 | 0.60251612        | 0.515989417        |
| 262807_at           | AT1G11740 | 0.56517219                        | 0.637793398              | 0.815430122     | 2.167279471                 | 0.978365462       | 0.913982022        |
| 259410_at           | AT1G13340 | 0.620709624                       | 0.440334937              | 0.958843099     | 1.810079132                 | 0.817745066       | 0.891743417        |
| 256131_at           | AT1G13600 | 0.386662424                       | 0.381218809              | 0.359668322     | 1.200399443                 | 0.458594705       | 0.437504248        |
| 259424_at           | AT1G13830 | 0.705653826                       | 0.492580853              | 1.45190542      | 2.530476863                 | 0.789551641       | 0.852299132        |
| 262649_at           | AT1G14040 | 0.758715901                       | 0.831184118              | 2.908313186     | 11.62771623                 | 2.489204341       | 1.714595712        |
| 261479_at           | AT1G14380 | 0.87817064                        | 0.917267165              | 1.282621935     | 4.228122738                 | 1.629998651       | 1.554398167        |
| 262730_at           | AT1G16390 | 0.559114344                       | 0.468603778              | 0.827972874     | 8.433294345                 | 1.485318161       | 1.019546695        |
| 262512_at           | AT1G17145 | 1.576815478                       | 0.854905629              | 2.598670392     | 5.693095145                 | 1.237050317       | 1.840776273        |
| 255899_at           | AT1G17970 | 0.605907594                       | 0.549807755              | 1.369416212     | 2.95130298                  | 0.764187367       | 0.60803857         |
| 261674_at           | AT1G18270 | 3.109425186                       | 0.947317989              | 3.239610419     | 6.003637171                 | 2.084712558       | 2.032983076        |
| 261669_at           | AT1G18490 | 1.408751755                       | 1.082477307              | 1.290872329     | 7.00908711                  | 2.003062319       | 1.549556553        |
| 261378_at           | AT1G18890 | 2.100593995                       | 0.829324854              | 2.18834404      | 7.772495019                 | 1.788896192       | 1.801717363        |

**Supplementary Tables pertaining to Figure 3**

**Supplementary Table S19. Loci enriched in individual cell types from microarray data**

**Loci enriched in Endodermis/Quiescent Center (SCR) from micorarray expression data analysis (1.7 fold, p <0.5)**

| Affymetrix Probeset | Locus     | Mean Microarray Expression Values |                          |                 |                             |                   |                    |
|---------------------|-----------|-----------------------------------|--------------------------|-----------------|-----------------------------|-------------------|--------------------|
|                     |           | Root Hairs (COBL9)                | Non-Hair Epidermis (WER) | Cortex (CORTEX) | Endodermis/ Quiescent (SCR) | Vasculature (WOL) | Columella (PET111) |
| 255940_at           | AT1G20380 | 0.999041729                       | 0.886353013              | 1.224018288     | 5.553717893                 | 1.513491846       | 1.315129171        |
| 259544_at           | AT1G20620 | 0.662969471                       | 0.695288174              | 1.360434342     | 3.453460376                 | 1.129601858       | 1.163802285        |
| 259517_at           | AT1G20630 | 0.983941277                       | 0.829677746              | 1.462199902     | 2.936794052                 | 1.445726016       | 1.679483448        |
| 264210_at           | AT1G22640 | 6.429715066                       | 3.403401192              | 5.66863248      | 11.36247574                 | 4.139054515       | 4.798623698        |
| 264898_at           | AT1G23205 | 0.628776046                       | 0.51511623               | 0.896664944     | 2.469924781                 | 0.82509314        | 0.780272995        |
| 262986_at           | AT1G23390 | 2.275902632                       | 0.663784312              | 2.04784769      | 6.549813563                 | 1.172342565       | 1.467700297        |
| 265172_at           | AT1G23820 | 2.347425998                       | 6.217915582              | 7.477839005     | 13.958126                   | 5.527718412       | 5.878637176        |
| 265023_at           | AT1G24440 | 2.009508692                       | 1.168007026              | 3.193431724     | 9.50079684                  | 1.961131302       | 2.864066245        |
| 265028_at           | AT1G24530 | 1.025412766                       | 0.583432195              | 0.976893819     | 2.845172894                 | 1.507668776       | 1.417562691        |
| 253397_at           | AT1G26150 | 0.474629266                       | 0.525362207              | 0.544517772     | 4.212921543                 | 1.027498126       | 0.706822908        |
| 262750_at           | AT1G28710 | 0.511021665                       | 0.596234459              | 0.572638148     | 3.571035696                 | 0.834206933       | 0.700042065        |
| 259788_at           | AT1G29670 | 0.466400187                       | 0.388999256              | 0.398049882     | 1.535099554                 | 0.483587342       | 0.501098181        |
| 255999_at           | AT1G29860 | 0.546896602                       | 0.496430417              | 0.483357288     | 1.006244553                 | 0.559943096       | 0.540838863        |
| 261801_at           | AT1G30520 | 0.579291628                       | 0.647725933              | 0.721024772     | 3.665997167                 | 0.813915726       | 0.668641099        |
| 263227_at           | AT1G30750 | 1.191875392                       | 0.699708274              | 1.325113834     | 38.57506245                 | 4.143847107       | 1.70038073         |
| 246635_at           | AT1G31720 | 0.573237882                       | 0.47127653               | 0.50281167      | 4.281785773                 | 1.121201291       | 1.79093792         |
| 245792_at           | AT1G32100 | 0.647761596                       | 0.588771685              | 1.77261889      | 23.24775515                 | 8.387159992       | 12.12782782        |
| 261708_at           | AT1G32740 | 0.463048004                       | 0.482477728              | 0.545291529     | 2.659580902                 | 0.90912074        | 0.821069962        |
| 262408_at           | AT1G34750 | 1.606617168                       | 1.257622693              | 1.356101716     | 2.787768453                 | 0.854792536       | 1.125582397        |
| 245757_at           | AT1G35140 | 0.596614951                       | 0.622070357              | 1.849224827     | 4.572391022                 | 0.733128109       | 0.621276496        |
| 259548_at           | AT1G35260 | 0.378705306                       | 0.404740986              | 0.564154228     | 2.920336718                 | 0.62158101        | 0.550356941        |
| 259624_at           | AT1G43020 | 0.473669563                       | 0.422421401              | 0.522733292     | 14.14869965                 | 1.276926943       | 0.581663632        |
| 260813_at           | AT1G43700 | 0.836036824                       | 0.941994439              | 1.459297427     | 4.221320846                 | 1.260786892       | 1.135552158        |
| 259506_at           | AT1G43900 | 3.081943519                       | 1.883305171              | 3.1201942       | 5.569709576                 | 2.837344575       | 2.059778409        |
| 260941_at           | AT1G44970 | 0.639465983                       | 0.526791997              | 0.701992004     | 21.85014161                 | 2.791036569       | 0.87959773         |
| 261308_at           | AT1G48480 | 0.456906179                       | 0.540073703              | 1.331889095     | 4.294935233                 | 1.043165395       | 0.61205621         |
| 261307_at           | AT1G48520 | 0.853407865                       | 0.91373809               | 0.951346228     | 2.394489549                 | 1.100153262       | 1.082205186        |
| 262393_at           | AT1G49490 | 0.375507429                       | 0.412533741              | 0.406648752     | 1.30520247                  | 0.464589853       | 0.44810682         |
| 261605_at           | AT1G49580 | 0.716619233                       | 1.261901536              | 1.457307037     | 6.17520823                  | 1.27112259        | 1.140361791        |
| 261866_at           | AT1G50420 | 0.582453158                       | 0.541228182              | 1.073643194     | 2.746968727                 | 1.058269079       | 0.774045337        |
| 246631_at           | AT1G50740 | 4.995524532                       | 3.776161386              | 5.370481234     | 16.62720345                 | 1.948083695       | 9.094913275        |

**Supplementary Tables pertaining to Figure 3**

**Supplementary Table S19. Loci enriched in individual cell types from microarray data**

**Loci enriched in Endodermis/Quiescent Center (SCR) from micorarray expression data analysis (1.7 fold, p <0.5)**

| Affymetrix Probeset | Locus     | Mean Microarray Expression Values |                          |                 |                             |                   |                    |
|---------------------|-----------|-----------------------------------|--------------------------|-----------------|-----------------------------|-------------------|--------------------|
|                     |           | Root Hairs (COBL9)                | Non-Hair Epidermis (WER) | Cortex (CORTEX) | Endodermis/ Quiescent (SCR) | Vasculature (WOL) | Columella (PET111) |
| 260490_at           | AT1G51500 | 1.094182196                       | 0.61002403               | 1.014996052     | 1.964908563                 | 0.88802558        | 1.014857843        |
| 256186_at           | AT1G51680 | 0.989632155                       | 0.625870781              | 5.776820479     | 17.45294077                 | 5.093933415       | 3.12811044         |
| 260643_at           | AT1G53270 | 0.579209872                       | 0.481444301              | 0.564729499     | 2.285891608                 | 0.763199079       | 0.697995682        |
| 263005_at           | AT1G54540 | 0.476571313                       | 0.425054213              | 0.514300146     | 4.428244086                 | 0.609975624       | 0.576856691        |
| 264186_at           | AT1G54570 | 0.5358364                         | 0.55913501               | 1.473377343     | 2.71993392                  | 0.905125045       | 0.855490194        |
| 256220_at           | AT1G56230 | 0.570891009                       | 0.485482207              | 1.539597258     | 6.10066296                  | 2.955597081       | 1.315764146        |
| 256217_at           | AT1G56320 | 1.16552131                        | 0.791294634              | 0.91192899      | 2.547935849                 | 0.982378263       | 1.289852199        |
| 264941_at           | AT1G60680 | 0.719280946                       | 0.501375225              | 0.689984291     | 5.722816639                 | 1.121083554       | 1.224160159        |
| 264911_at           | AT1G60690 | 0.610871998                       | 0.601145834              | 0.709254472     | 3.523259527                 | 0.902802878       | 0.692510518        |
| 264912_at           | AT1G60730 | 0.522303958                       | 0.466032122              | 0.708059316     | 1.298768647                 | 0.65985893        | 0.65728707         |
| 264930_at           | AT1G60800 | 0.488631666                       | 0.518677381              | 0.948367593     | 2.601900198                 | 1.140134875       | 1.172018086        |
| 264932_at           | AT1G61240 | 0.601748633                       | 0.652655885              | 0.63085274      | 7.886160814                 | 1.138728088       | 0.797504637        |
| 265031_at           | AT1G61590 | 0.571250517                       | 0.48588654               | 0.917195414     | 23.12610001                 | 1.393109873       | 0.79578176         |
| 264280_at           | AT1G61820 | 3.343527001                       | 0.623723104              | 8.508118458     | 14.94736716                 | 4.093805623       | 7.565925623        |
| 265116_at           | AT1G62480 | 1.542440192                       | 1.388773875              | 7.575236838     | 23.11987074                 | 12.74839299       | 4.904188845        |
| 259694_at           | AT1G63180 | 0.476428908                       | 0.399415514              | 0.434223756     | 4.32288722                  | 0.807201564       | 1.242374716        |
| 259737_at           | AT1G64400 | 0.680575707                       | 0.554414772              | 0.590067846     | 1.404511573                 | 0.722731668       | 0.567115727        |
| 261973_at           | AT1G64610 | 0.572524858                       | 0.552013279              | 1.181863332     | 2.634255648                 | 0.993432725       | 0.896542146        |
| 264181_at           | AT1G65350 | 0.661019534                       | 0.616180757              | 0.778912765     | 2.047712069                 | 0.751071306       | 0.658224785        |
| 262930_at           | AT1G65690 | 0.84782245                        | 0.470847389              | 0.706922385     | 2.136002693                 | 0.515588732       | 0.996173661        |
| 261921_at           | AT1G65900 | 0.466834701                       | 0.447829805              | 0.528691694     | 2.178918286                 | 0.778455513       | 0.596064187        |
| 257583_at           | AT1G66480 | 1.315215333                       | 1.015121144              | 0.789447272     | 3.891994213                 | 0.830724903       | 0.999384713        |
| 255854_at           | AT1G67050 | 0.924458077                       | 0.520575437              | 1.273942398     | 2.519349246                 | 1.337991408       | 1.090033843        |
| 255857_at           | AT1G67080 | 0.543267406                       | 0.765264368              | 1.171879023     | 2.678984994                 | 1.321975039       | 1.095076815        |
| 245193_at           | AT1G67810 | 1.027705825                       | 1.016607293              | 1.458426981     | 2.991465393                 | 1.30315497        | 1.130468322        |
| 256300_at           | AT1G69490 | 0.808270634                       | 0.629184347              | 1.120584218     | 3.123389239                 | 1.381957853       | 1.260839483        |
| 259832_at           | AT1G69580 | 0.418109294                       | 0.379633863              | 0.382242369     | 2.738188248                 | 1.167236674       | 0.572633832        |
| 260406_at           | AT1G69920 | 0.672816836                       | 0.475649643              | 0.56769271      | 2.037317749                 | 0.557129249       | 0.648382111        |
| 260405_at           | AT1G69930 | 1.175856655                       | 0.785430023              | 2.90324761      | 6.999112461                 | 0.969701888       | 1.118008959        |
| 264718_at           | AT1G70130 | 0.494523486                       | 0.42386786               | 0.793729174     | 3.753693947                 | 1.208435818       | 1.295013603        |
| 264717_at           | AT1G70140 | 1.948865136                       | 0.716057943              | 0.948582288     | 13.7438398                  | 1.29616654        | 7.404419524        |



**Supplementary Tables pertaining to Figure 3**

**Supplementary Table S19. Loci enriched in individual cell types from microarray data**

**Loci enriched in Endodermis/Quiescent Center (SCR) from micorarray expression data analysis (1.7 fold, p <0.5)**

| Affymetrix Probeset | Locus     | Mean Microarray Expression Values |                          |                 |                             |                   |                    |
|---------------------|-----------|-----------------------------------|--------------------------|-----------------|-----------------------------|-------------------|--------------------|
|                     |           | Root Hairs (COBL9)                | Non-Hair Epidermis (WER) | Cortex (CORTEX) | Endodermis/ Quiescent (SCR) | Vasculature (WOL) | Columella (PET111) |
| 260206_at           | AT1G70740 | 1.066866598                       | 0.769877963              | 1.744514712     | 2.966141708                 | 0.937060781       | 1.460084939        |
| 261522_at           | AT1G71710 | 0.491100165                       | 0.522154242              | 0.860639749     | 1.776793217                 | 0.744777586       | 0.652051243        |
| 261509_at           | AT1G71740 | 0.902382124                       | 0.68927387               | 0.974291382     | 31.09902664                 | 2.676149567       | 1.148207979        |
| 259801_at           | AT1G72230 | 0.475704329                       | 0.511515753              | 0.663972038     | 11.35155894                 | 2.447273828       | 1.086306391        |
| 260454_at           | AT1G72310 | 0.791240138                       | 1.122495139              | 1.232244524     | 12.54968902                 | 2.496119678       | 3.896133525        |
| 260451_at           | AT1G72360 | 0.685875469                       | 0.503033719              | 0.694832454     | 2.49830391                  | 0.76320922        | 0.658309906        |
| 260427_at           | AT1G72430 | 0.731205387                       | 0.627898793              | 1.105072988     | 6.464339173                 | 1.781639657       | 1.05621963         |
| 260399_at           | AT1G72520 | 1.730271731                       | 0.786655766              | 3.479932737     | 6.692832676                 | 1.659702005       | 2.697423399        |
| 259863_at           | AT1G72630 | 1.293601497                       | 0.72225581               | 0.87760716      | 2.388184206                 | 0.616587002       | 0.526190902        |
| 259865_at           | AT1G72710 | 3.505890449                       | 4.142655816              | 4.706523891     | 10.03133964                 | 3.27493563        | 3.539581302        |
| 262382_at           | AT1G72920 | 0.629883266                       | 0.533473787              | 0.970311364     | 1.875437345                 | 0.464585371       | 0.445446188        |
| 262383_at           | AT1G72940 | 0.92276654                        | 0.67270466               | 2.010937456     | 4.026744973                 | 0.873151001       | 0.93731919         |
| 260074_at           | AT1G73640 | 0.710150612                       | 0.564989688              | 1.332943548     | 10.09169446                 | 1.476751973       | 1.403802613        |
| 260394_at           | AT1G74080 | 0.503455377                       | 0.453773514              | 0.835676855     | 2.317526735                 | 0.650668019       | 0.61352727         |
| 260234_at           | AT1G74460 | 0.715300495                       | 0.547911673              | 0.57529738      | 1.265123881                 | 0.647104945       | 0.650144163        |
| 256455_at           | AT1G75190 | 0.369759331                       | 0.454542141              | 0.591281559     | 1.741206182                 | 0.947899572       | 0.520885654        |
| 262947_at           | AT1G75750 | 3.168595096                       | 1.275164172              | 18.39837898     | 55.55371447                 | 22.0987712        | 14.36460238        |
| 262682_at           | AT1G75900 | 0.46620721                        | 0.429807197              | 0.465211861     | 1.676380181                 | 0.55639383        | 0.52319476         |
| 261777_at           | AT1G76210 | 0.958222114                       | 0.477477246              | 0.588786194     | 3.816849759                 | 0.576395601       | 0.5136891          |
| 263127_at           | AT1G78610 | 1.096149195                       | 0.99034947               | 1.932197621     | 3.433220936                 | 1.708332468       | 1.77283592         |
| 264137_at           | AT1G78960 | 0.775634643                       | 0.591589791              | 0.89622097      | 3.802919074                 | 0.851648814       | 0.949764755        |
| 259860_at           | AT1G80640 | 1.041884864                       | 0.931875521              | 0.886975649     | 3.400356679                 | 1.140503883       | 1.443461865        |
| 261899_at           | AT1G80820 | 0.5453181                         | 0.422767791              | 0.880703513     | 9.209430117                 | 0.69836858        | 0.545434753        |
| 266234_at           | AT2G02350 | 0.742307869                       | 0.688524855              | 0.759630937     | 1.579718336                 | 0.884565766       | 0.812714265        |
| 266235_at           | AT2G02360 | 0.8190185                         | 0.65445158               | 0.861449986     | 1.481279354                 | 0.760560344       | 0.833885657        |
| 266182_at           | AT2G02370 | 0.922637582                       | 0.781474205              | 1.172651076     | 2.783000878                 | 1.18071315        | 1.284532128        |
| 267472_at           | AT2G02850 | 0.525151513                       | 0.498665044              | 0.539556005     | 1.470555347                 | 0.628274296       | 0.669258545        |
| 263046_at           | AT2G05380 | 0.825535765                       | 0.588736614              | 0.857038565     | 2.151883417                 | 0.719165114       | 0.59571777         |
| 265511_at           | AT2G05540 | 0.670615178                       | 0.627030041              | 0.634244922     | 1.780237267                 | 0.831166777       | 0.631709276        |
| 266428_at           | AT2G07180 | 1.480668                          | 0.900125865              | 1.971511255     | 4.0247689                   | 1.001542416       | 1.418287621        |
| 266613_at           | AT2G14900 | 0.569163243                       | 0.521765915              | 1.558687448     | 20.68031334                 | 3.136609922       | 1.730655887        |

**Supplementary Tables pertaining to Figure 3**

**Supplementary Table S19. Loci enriched in individual cell types from microarray data**

**Loci enriched in Endodermis/Quiescent Center (SCR) from micorarray expression data analysis (1.7 fold, p <0.5)**

| Affymetrix Probeset | Locus     | Mean Microarray Expression Values |                          |                 |                             |                   |                    |
|---------------------|-----------|-----------------------------------|--------------------------|-----------------|-----------------------------|-------------------|--------------------|
|                     |           | Root Hairs (COBL9)                | Non-Hair Epidermis (WER) | Cortex (CORTEX) | Endodermis/ Quiescent (SCR) | Vasculature (WOL) | Columella (PET111) |
| 263327_at           | AT2G15300 | 0.667069783                       | 0.507543315              | 0.572311072     | 8.12703585                  | 1.071391498       | 0.806509398        |
| 265359_at           | AT2G16720 | 2.471933289                       | 0.830746009              | 5.614091564     | 11.7252536                  | 3.203200183       | 3.86567584         |
| 265405_at           | AT2G16750 | 0.481745902                       | 0.398138436              | 1.064714528     | 1.920127516                 | 0.7040423         | 0.520330157        |
| 266526_at           | AT2G16980 | 2.054152273                       | 0.671918867              | 4.178988438     | 7.104913041                 | 1.776548039       | 1.46885637         |
| 264594_at           | AT2G17640 | 0.540388713                       | 0.496477016              | 0.828457694     | 1.48974871                  | 0.750481439       | 0.819515319        |
| 265807_at           | AT2G17990 | 2.325907634                       | 1.541038659              | 2.258579154     | 5.294655163                 | 2.773569814       | 2.500902715        |
| 265336_at           | AT2G18290 | 0.839522344                       | 1.002611376              | 0.939948986     | 2.721234188                 | 1.161955843       | 1.165018276        |
| 265309_at           | AT2G20290 | 0.645285692                       | 0.717310518              | 0.555088169     | 6.029072839                 | 0.977954944       | 1.507187276        |
| 264010_at           | AT2G21100 | 0.459310565                       | 0.406684709              | 0.476674737     | 21.04085868                 | 1.452465916       | 0.672629085        |
| 264052_at           | AT2G22330 | 0.664301314                       | 0.564532835              | 0.961769761     | 2.365324713                 | 1.287409555       | 1.056163484        |
| 265350_at           | AT2G22620 | 0.429348317                       | 0.369275285              | 0.398934693     | 12.54244024                 | 1.13387458        | 0.616208486        |
| 266798_at           | AT2G22850 | 0.622380647                       | 0.510717949              | 1.10354643      | 2.381213508                 | 0.936625132       | 1.007125141        |
| 267265_at           | AT2G22980 | 0.415496014                       | 0.379209238              | 0.417218034     | 1.349654297                 | 0.48068037        | 0.44091122         |
| 245084_at           | AT2G23290 | 1.073703728                       | 0.788711304              | 1.119962611     | 3.178355796                 | 1.156888915       | 1.067056347        |
| 267121_at           | AT2G23540 | 0.359904924                       | 0.379582802              | 0.486300114     | 1.185457337                 | 0.447641256       | 0.419659642        |
| 267123_at           | AT2G23560 | 0.738336502                       | 0.58561471               | 0.746665251     | 4.895349807                 | 1.289631319       | 1.204810814        |
| 265987_at           | AT2G24240 | 1.206514273                       | 0.641614453              | 1.035429917     | 8.091003298                 | 1.698575094       | 2.692603967        |
| 266655_at           | AT2G25880 | 0.416375823                       | 1.346120029              | 0.533454124     | 2.997972846                 | 1.200154833       | 0.950053688        |
| 267380_at           | AT2G26170 | 0.531161598                       | 0.430940505              | 0.721752042     | 2.75630922                  | 1.163096911       | 1.024504405        |
| 245028_at           | AT2G26570 | 2.190794755                       | 1.045085618              | 1.583949372     | 5.359917683                 | 1.285527605       | 1.13677962         |
| 265645_at           | AT2G27370 | 0.863491424                       | 0.750999985              | 1.174644025     | 25.82279644                 | 3.236886255       | 1.274423274        |
| 265547_at           | AT2G28305 | 0.459341688                       | 0.431316258              | 0.44664834      | 1.050382084                 | 0.541651846       | 0.476870951        |
| 263439_at           | AT2G28650 | 0.807754947                       | 0.568545358              | 0.712708535     | 10.47584334                 | 1.605936362       | 1.422874166        |
| 263437_at           | AT2G28670 | 0.952832703                       | 0.801732867              | 1.932909334     | 44.42672904                 | 5.511548674       | 1.704445177        |
| 266276_at           | AT2G29330 | 0.523631012                       | 0.430025631              | 0.671322149     | 1.680631467                 | 0.575203595       | 0.468191088        |
| 266273_at           | AT2G29410 | 0.448595409                       | 0.421411711              | 0.435511765     | 1.761969041                 | 0.536231071       | 0.513105994        |
| 267307_at           | AT2G30210 | 0.532896918                       | 0.529858248              | 0.698328105     | 28.99433854                 | 3.503031106       | 1.011188771        |
| 267564_at           | AT2G30740 | 2.834352288                       | 2.327140064              | 2.177753048     | 5.096207928                 | 1.773213664       | 1.517544196        |
| 267153_at           | AT2G30860 | 6.712739807                       | 12.78535164              | 16.42248361     | 31.89067542                 | 12.86942743       | 15.58484106        |
| 263467_at           | AT2G31730 | 0.654221848                       | 0.539976356              | 0.924219619     | 2.42042441                  | 0.757626836       | 0.68057749         |
| 266356_at           | AT2G32300 | 0.446366774                       | 0.495459129              | 0.761489445     | 26.44651899                 | 2.456606631       | 0.912280068        |

**Supplementary Tables pertaining to Figure 3**

**Supplementary Table S19. Loci enriched in individual cell types from microarray data**

**Loci enriched in Endodermis/Quiescent Center (SCR) from micorarray expression data analysis (1.7 fold, p <0.5)**

| Affymetrix Probeset | Locus     | Mean Microarray Expression Values |                          |                 |                             |                   |                    |
|---------------------|-----------|-----------------------------------|--------------------------|-----------------|-----------------------------|-------------------|--------------------|
|                     |           | Root Hairs (COBL9)                | Non-Hair Epidermis (WER) | Cortex (CORTEX) | Endodermis/ Quiescent (SCR) | Vasculature (WOL) | Columella (PET111) |
| 267544_at           | AT2G32720 | 2.158046747                       | 3.465961011              | 4.419135017     | 7.63640841                  | 3.438476809       | 2.641823315        |
| 267595_at           | AT2G32990 | 0.449744902                       | 0.78362305               | 0.510641471     | 2.354180023                 | 0.925273789       | 1.281058236        |
| 267000_at           | AT2G34310 | 0.836216518                       | 1.190274218              | 1.533129349     | 4.824677857                 | 1.335976858       | 1.040101594        |
| 266904_at           | AT2G34590 | 7.2034322                         | 9.165766128              | 11.461049       | 25.23156058                 | 10.38314859       | 6.03565024         |
| 263284_at           | AT2G36100 | 1.150373744                       | 0.862616116              | 2.831881793     | 55.50674924                 | 7.517020204       | 2.339816519        |
| 263920_at           | AT2G36410 | 0.568379048                       | 1.147245898              | 1.47493414      | 4.605304179                 | 2.212409298       | 0.942794765        |
| 263892_at           | AT2G36890 | 0.752551645                       | 0.572140621              | 0.828104627     | 1.538561129                 | 0.550963499       | 0.462053443        |
| 257381_at           | AT2G37950 | 0.543268324                       | 0.490287915              | 0.518732126     | 12.87418414                 | 1.306139284       | 0.66561747         |
| 267096_at           | AT2G38180 | 0.616967816                       | 0.604532319              | 0.675756793     | 3.990084383                 | 1.100826056       | 1.005455467        |
| 267054_at           | AT2G38370 | 0.436719138                       | 0.683572611              | 0.679940476     | 3.356541384                 | 1.656807378       | 1.942836816        |
| 267035_at           | AT2G38400 | 1.730195313                       | 1.334783093              | 1.100980273     | 12.69739183                 | 1.821383598       | 5.579255273        |
| 266415_at           | AT2G38530 | 0.620675316                       | 0.546036143              | 0.549858916     | 13.36261484                 | 0.732376613       | 0.588795098        |
| 266421_at           | AT2G38540 | 0.680255946                       | 0.535507626              | 0.585524391     | 5.076484668                 | 0.863309071       | 0.62295464         |
| 263296_at           | AT2G38800 | 0.723577513                       | 0.554236352              | 2.737501799     | 6.689644104                 | 1.669692644       | 2.904435206        |
| 266968_at           | AT2G39360 | 0.902925887                       | 0.426345272              | 1.311118144     | 3.47938149                  | 0.862762041       | 0.531081304        |
| 266978_at           | AT2G39430 | 1.066821646                       | 0.722415734              | 1.154194693     | 30.59117432                 | 2.635843376       | 1.177273659        |
| 267360_at           | AT2G40060 | 1.925765703                       | 3.29731506               | 5.024534903     | 10.81719966                 | 4.43414294        | 3.814486923        |
| 263387_at           | AT2G40160 | 0.478231793                       | 0.479476486              | 0.715976641     | 9.231394593                 | 1.054266234       | 0.69183251         |
| 245101_at           | AT2G40890 | 2.397815257                       | 1.019663666              | 10.36799757     | 21.6225121                  | 10.35264227       | 5.644626697        |
| 265856_at           | AT2G42430 | 0.850918999                       | 0.571885297              | 1.075945566     | 2.162169453                 | 0.954860651       | 1.059288878        |
| 263979_at           | AT2G42840 | 0.589778312                       | 0.632343422              | 0.581580567     | 2.654343025                 | 0.74413624        | 0.745182902        |
| 260563_at           | AT2G43840 | 0.727581305                       | 0.479901722              | 0.640728858     | 2.046160146                 | 0.852253851       | 0.904775579        |
| 267344_at           | AT2G44230 | 0.824086543                       | 0.573052234              | 0.529061581     | 1.413490434                 | 0.635147665       | 0.584980126        |
| 267391_at           | AT2G44480 | 0.451465215                       | 0.403325261              | 0.434922921     | 5.9699292                   | 0.689477408       | 0.538699362        |
| 266126_at           | AT2G45040 | 0.605333876                       | 0.663204896              | 0.542352035     | 3.307977648                 | 0.870611225       | 0.735103804        |
| 263783_at           | AT2G46400 | 4.046950039                       | 0.895634408              | 2.785883089     | 7.119964395                 | 1.624206926       | 3.368829597        |
| 266485_at           | AT2G47630 | 0.847130479                       | 0.74025269               | 1.31686987      | 7.983949527                 | 1.000322308       | 0.866174158        |
| 257371_at           | AT2G47810 | 0.90633389                        | 0.609380482              | 0.831168243     | 6.013123254                 | 1.102216556       | 1.145595455        |
| 266486_at           | AT2G47950 | 1.456344156                       | 0.656481147              | 1.505688555     | 3.076579436                 | 1.260141061       | 1.23451637         |
| 265771_at           | AT2G48030 | 0.895407277                       | 0.951057015              | 1.262479474     | 6.909576344                 | 0.958926046       | 0.982142032        |
| 262349_at           | AT2G48130 | 0.539532926                       | 0.55425416               | 0.581582616     | 6.716031893                 | 0.941593902       | 0.72608467         |

**Supplementary Tables pertaining to Figure 3**

**Supplementary Table S19. Loci enriched in individual cell types from microarray data**

**Loci enriched in Endodermis/Quiescent Center (SCR) from micorarray expression data analysis (1.7 fold, p <0.5)**

| Affymetrix Probeset | Locus     | Mean Microarray Expression Values |                          |                 |                             |                   |                    |
|---------------------|-----------|-----------------------------------|--------------------------|-----------------|-----------------------------|-------------------|--------------------|
|                     |           | Root Hairs (COBL9)                | Non-Hair Epidermis (WER) | Cortex (CORTEX) | Endodermis/ Quiescent (SCR) | Vasculature (WOL) | Columella (PET111) |
| 262317_at           | AT2G48140 | 0.529719126                       | 0.448544365              | 0.524865069     | 2.324064695                 | 0.571283183       | 0.553511856        |
| 259188_at           | AT3G01510 | 1.377674182                       | 1.357574868              | 1.052316108     | 3.826125394                 | 0.847892651       | 1.716087762        |
| 258487_at           | AT3G02550 | 0.708812537                       | 0.750366853              | 0.575849107     | 1.544723389                 | 0.806602142       | 0.765004297        |
| 258614_at           | AT3G02770 | 1.489663771                       | 0.911817263              | 5.853336843     | 12.19124457                 | 3.569316291       | 2.003166586        |
| 258599_at           | AT3G04520 | 0.821334497                       | 0.552455686              | 0.979868036     | 7.145580645                 | 1.511893769       | 0.755172685        |
| 259309_at           | AT3G05050 | 2.063746817                       | 1.220000192              | 1.036565804     | 3.516248528                 | 1.388684498       | 1.648746973        |
| 258511_at           | AT3G06590 | 0.697567766                       | 0.906588272              | 1.016443776     | 2.288957799                 | 1.285551512       | 1.089744454        |
| 258675_at           | AT3G08770 | 0.561985758                       | 0.547340282              | 0.570614734     | 2.091793381                 | 0.597668563       | 0.58304494         |
| 258719_at           | AT3G09540 | 0.455932213                       | 0.464315143              | 0.949249572     | 4.371628176                 | 0.770186827       | 0.669508923        |
| 258757_at           | AT3G10910 | 0.618525715                       | 0.499669958              | 0.812263363     | 5.830755003                 | 0.859736421       | 0.764459886        |
| 259291_at           | AT3G11550 | 0.526712961                       | 0.499172577              | 0.935348512     | 38.2794723                  | 2.694264067       | 0.953177696        |
| 256659_at           | AT3G12020 | 0.563686459                       | 0.562726046              | 0.461448285     | 2.548845983                 | 0.580387614       | 0.580755433        |
| 257280_at           | AT3G14440 | 0.484861392                       | 0.625271382              | 0.853925692     | 1.663558231                 | 0.618628169       | 0.660378144        |
| 257105_at           | AT3G15300 | 2.883606494                       | 1.715718097              | 1.222303449     | 5.449602262                 | 1.67607154        | 1.797878712        |
| 258287_at           | AT3G15990 | 0.510983923                       | 0.476385779              | 0.603006783     | 1.345061387                 | 0.626124329       | 0.512140876        |
| 259380_at           | AT3G16340 | 0.820431327                       | 0.579888079              | 1.016662176     | 10.8363483                  | 2.686545927       | 1.933950998        |
| 259375_at           | AT3G16370 | 0.626862308                       | 0.86082817               | 0.595090977     | 1.499631051                 | 0.688447117       | 0.696283232        |
| 258377_at           | AT3G17690 | 0.482213441                       | 0.383471287              | 0.619767149     | 3.817659219                 | 1.309048708       | 1.639925546        |
| 256948_at           | AT3G18930 | 0.65032347                        | 0.448792867              | 0.558927027     | 1.375121469                 | 0.648206164       | 0.68011132         |
| 257672_at           | AT3G20300 | 1.040400539                       | 0.676682312              | 0.546496124     | 1.821111023                 | 0.662167832       | 0.81239067         |
| 256970_at           | AT3G21090 | 0.686393154                       | 0.692829904              | 0.625195466     | 1.755060074                 | 0.691724639       | 0.885468913        |
| 258047_at           | AT3G21240 | 1.637145448                       | 0.950169325              | 8.926883047     | 18.90766973                 | 6.548042909       | 3.525076943        |
| 256825_at           | AT3G22120 | 0.54715052                        | 0.484978324              | 0.602792485     | 1.160012756                 | 0.681284456       | 0.616298441        |
| 258445_at           | AT3G22400 | 0.432300479                       | 0.461303904              | 0.480023386     | 2.922808081                 | 1.12869588        | 0.745845755        |
| 256926_at           | AT3G22540 | 0.771819476                       | 1.19893695               | 4.296920832     | 7.757608614                 | 1.404080508       | 0.734836797        |
| 256933_at           | AT3G22600 | 0.896410586                       | 0.806559191              | 3.141969458     | 45.70831607                 | 5.754916755       | 2.807674214        |
| 256937_at           | AT3G22620 | 0.716046306                       | 1.014911708              | 1.08331096      | 32.69600588                 | 4.253574314       | 1.382503068        |
| 256929_at           | AT3G22620 | 0.609903733                       | 0.547633427              | 0.600132899     | 1.988772493                 | 0.689887575       | 0.552101121        |
| 258321_at           | AT3G22840 | 0.720747624                       | 0.7904645                | 3.590079481     | 8.960345033                 | 1.761547948       | 4.500032326        |
| 257923_at           | AT3G23160 | 0.493781561                       | 0.656145142              | 0.79467029      | 12.74371097                 | 1.670980151       | 0.847429049        |
| 257919_at           | AT3G23250 | 0.789233987                       | 0.425888925              | 1.588392209     | 2.813583322                 | 0.873614699       | 1.030766823        |

**Supplementary Tables pertaining to Figure 3**

**Supplementary Table S19. Loci enriched in individual cell types from microarray data**

**Loci enriched in Endodermis/Quiescent Center (SCR) from micorarray expression data analysis (1.7 fold, p <0.5)**

| Affymetrix Probeset | Locus     | Mean Microarray Expression Values |                          |                 |                             |                   |                    |
|---------------------|-----------|-----------------------------------|--------------------------|-----------------|-----------------------------|-------------------|--------------------|
|                     |           | Root Hairs (COBL9)                | Non-Hair Epidermis (WER) | Cortex (CORTEX) | Endodermis/ Quiescent (SCR) | Vasculature (WOL) | Columella (PET111) |
| 258291_at           | AT3G23310 | 0.563197202                       | 0.828775968              | 0.737869876     | 2.037159768                 | 1.066032111       | 0.761617138        |
| 257203_at           | AT3G23730 | 0.441902157                       | 0.398387768              | 0.587203973     | 4.055297218                 | 1.039233961       | 0.613699904        |
| 256889_at           | AT3G24010 | 2.290794281                       | 1.903002579              | 2.014108361     | 5.279810696                 | 2.481301027       | 2.498430735        |
| 256759_at           | AT3G25640 | 0.592912754                       | 0.476482372              | 0.596097642     | 1.675677791                 | 0.875267849       | 0.854154637        |
| 258060_at           | AT3G26030 | 2.477130978                       | 2.858333232              | 3.131049691     | 5.994777384                 | 3.104207645       | 1.963150732        |
| 257784_at           | AT3G26980 | 1.197676927                       | 0.957837185              | 2.217925559     | 4.503364799                 | 1.350570295       | 1.463334522        |
| 257147_at           | AT3G27270 | 0.769944307                       | 0.608054851              | 0.794389823     | 3.148592951                 | 1.144290929       | 0.832307532        |
| 256991_at           | AT3G28600 | 0.465664987                       | 0.36274483               | 0.446483188     | 1.879083624                 | 0.942841037       | 0.843513577        |
| 256598_at           | AT3G30180 | 0.623626072                       | 0.511443131              | 1.458228407     | 3.613024768                 | 1.492109512       | 0.69230728         |
| 252557_at           | AT3G45960 | 0.453478547                       | 0.425264475              | 0.671048741     | 2.473246074                 | 0.535584939       | 0.480961992        |
| 252282_at           | AT3G49360 | 0.589485877                       | 0.511086419              | 0.631155475     | 1.900425968                 | 1.097612491       | 0.606646918        |
| 252233_at           | AT3G49690 | 0.584508018                       | 0.461783153              | 0.651530297     | 3.156790418                 | 0.785664368       | 1.345715479        |
| 252251_at           | AT3G49820 | 0.542836548                       | 0.477500103              | 0.549727411     | 1.127562847                 | 0.535528816       | 0.546679951        |
| 252195_at           | AT3G50190 | 0.425476701                       | 0.524118481              | 0.543253351     | 2.680984098                 | 0.548584408       | 0.548707267        |
| 252202_at           | AT3G50300 | 1.902859007                       | 1.167957292              | 4.477877388     | 10.00936182                 | 2.049391828       | 1.181740379        |
| 252131_at           | AT3G50930 | 3.890109697                       | 2.162928291              | 1.543605909     | 9.242586782                 | 1.742854312       | 4.027648937        |
| 252101_at           | AT3G51300 | 0.703082034                       | 0.691249691              | 0.727612847     | 3.195116478                 | 1.106040443       | 1.371678208        |
| 252053_at           | AT3G52400 | 5.761965362                       | 1.262185852              | 3.791842491     | 11.06381269                 | 1.741938921       | 2.509044028        |
| 252060_at           | AT3G52430 | 0.979566632                       | 0.411643451              | 0.868432661     | 2.660958804                 | 0.667298796       | 0.761421245        |
| 252023_at           | AT3G52920 | 0.394976978                       | 0.986898599              | 0.793115455     | 4.917579325                 | 2.792193573       | 1.818237429        |
| 251984_at           | AT3G53260 | 2.870847939                       | 1.34248962               | 11.24079155     | 32.81899625                 | 6.97459614        | 4.25188268         |
| 251890_at           | AT3G54220 | 0.839925862                       | 1.011587758              | 2.571999211     | 8.143595605                 | 1.61257894        | 0.794116398        |
| 251824_at           | AT3G55090 | 0.582169267                       | 0.409774058              | 0.477654697     | 1.159665647                 | 0.522177944       | 0.546196337        |
| 251795_at           | AT3G55390 | 0.873878327                       | 0.839199909              | 0.908083789     | 6.309410951                 | 1.13001694        | 0.976416474        |
| 251723_at           | AT3G56230 | 2.964180467                       | 2.015809258              | 3.757753193     | 9.100735065                 | 2.024332118       | 2.47667803         |
| 251733_at           | AT3G56240 | 5.748443411                       | 1.683988537              | 3.106430917     | 24.22010455                 | 9.435113207       | 6.982205855        |
| 251563_at           | AT3G57880 | 0.724065469                       | 0.932548129              | 2.036996275     | 9.519565065                 | 2.478126685       | 1.225655733        |
| 251494_at           | AT3G59350 | 2.933561661                       | 1.151457725              | 4.295959314     | 7.630058509                 | 3.531694713       | 2.679957763        |
| 251259_at           | AT3G62260 | 2.050054995                       | 1.09439462               | 4.643481567     | 9.48999145                  | 2.178378361       | 4.738899193        |
| 251162_at           | AT3G63300 | 0.546035539                       | 0.481412574              | 0.756203753     | 3.204008015                 | 1.606628598       | 0.988569975        |
| 251166_at           | AT3G63350 | 0.464700411                       | 0.53350714               | 0.649509731     | 2.145559021                 | 0.834555977       | 0.786547358        |

**Supplementary Tables pertaining to Figure 3**

**Supplementary Table S19. Loci enriched in individual cell types from microarray data**

**Loci enriched in Endodermis/Quiescent Center (SCR) from micorarray expression data analysis (1.7 fold, p <0.5)**

| Affymetrix Probeset | Locus     | Mean Microarray Expression Values |                          |                 |                             |                   |                    |
|---------------------|-----------|-----------------------------------|--------------------------|-----------------|-----------------------------|-------------------|--------------------|
|                     |           | Root Hairs (COBL9)                | Non-Hair Epidermis (WER) | Cortex (CORTEX) | Endodermis/ Quiescent (SCR) | Vasculature (WOL) | Columella (PET111) |
| 255692_at           | AT4G00400 | 0.557377467                       | 0.901437169              | 0.473380261     | 2.151640304                 | 0.62934666        | 0.499736549        |
| 255622_at           | AT4G01070 | 2.895883788                       | 0.74679086               | 4.612540211     | 11.42954234                 | 2.692267274       | 1.952367887        |
| 255528_at           | AT4G02090 | 0.972106234                       | 0.688878492              | 1.041412753     | 33.04387511                 | 3.341761407       | 1.299605934        |
| 255250_at           | AT4G05100 | 0.488734638                       | 0.407615165              | 1.470420927     | 3.03211598                  | 0.708591883       | 0.999589337        |
| 255264_at           | AT4G05170 | 0.576573797                       | 0.480203775              | 0.748793115     | 16.66711564                 | 1.203908323       | 0.654889884        |
| 255110_at           | AT4G08770 | 0.659037649                       | 0.517431006              | 0.659598587     | 6.263689335                 | 1.273335797       | 0.641636954        |
| 255080_at           | AT4G09030 | 3.979165872                       | 5.706491448              | 8.337437667     | 16.75824724                 | 9.079404159       | 6.448741886        |
| 255047_at           | AT4G09670 | 0.81292646                        | 1.136050971              | 1.510416845     | 3.274387775                 | 1.689484709       | 1.533522236        |
| 255028_at           | AT4G09890 | 0.302584384                       | 0.322830103              | 0.34143014      | 4.778011909                 | 1.191324112       | 0.576436915        |
| 254907_at           | AT4G11190 | 0.536860386                       | 0.468093494              | 0.636321985     | 5.612953137                 | 1.718450002       | 0.857615483        |
| 254914_at           | AT4G11290 | 0.565817953                       | 0.545293347              | 1.859108996     | 27.61945523                 | 3.294022124       | 1.811716645        |
| 254849_at           | AT4G11970 | 0.764726551                       | 0.766261591              | 0.714800041     | 2.250963455                 | 1.043988305       | 1.003421907        |
| 254803_at           | AT4G13100 | 0.487931086                       | 0.517533847              | 0.897120464     | 2.757609825                 | 0.893640314       | 0.775276115        |
| 254726_at           | AT4G13660 | 3.117443083                       | 1.592242724              | 9.378509969     | 15.98260102                 | 3.230751201       | 1.871321325        |
| 245386_at           | AT4G14010 | 0.492646841                       | 0.907012604              | 0.593810436     | 4.499747655                 | 2.067374608       | 1.680685537        |
| 245612_at           | AT4G14440 | 0.630260852                       | 0.527003652              | 0.556695808     | 1.406564159                 | 0.601376002       | 0.660915346        |
| 245563_at           | AT4G14580 | 0.609431264                       | 0.573288106              | 0.843849182     | 2.042916146                 | 1.037363809       | 1.128296186        |
| 245363_at           | AT4G15120 | 0.931895049                       | 0.519079841              | 1.048735869     | 2.359948789                 | 0.743979202       | 0.739967279        |
| 245550_at           | AT4G15330 | 0.510450589                       | 0.446702516              | 0.621427171     | 5.969646307                 | 0.869073891       | 0.900661871        |
| 245486_x_at         | AT4G16240 | 0.930847194                       | 0.888669928              | 1.056880836     | 3.273862909                 | 1.259248372       | 0.843107805        |
| 245488_at           | AT4G16270 | 0.671861503                       | 0.519248429              | 0.682183597     | 3.664095984                 | 1.058659058       | 0.776194545        |
| 245341_at           | AT4G16447 | 0.472825873                       | 0.434321945              | 0.451902744     | 1.513435189                 | 0.615821017       | 0.523302043        |
| 245305_at           | AT4G17215 | 0.656497039                       | 0.474536135              | 0.936740664     | 22.85803829                 | 2.155394947       | 0.907453977        |
| 245410_at           | AT4G17220 | 0.398697902                       | 0.429368654              | 0.998345191     | 5.646187741                 | 1.302922081       | 1.520338923        |
| 245412_at           | AT4G17280 | 0.931711194                       | 2.262510017              | 3.275809604     | 17.92867072                 | 2.154656746       | 1.128959473        |
| 245413_at           | AT4G17300 | 1.393044822                       | 1.159457976              | 1.362325588     | 4.763091966                 | 1.525937187       | 1.304179258        |
| 245423_at           | AT4G17483 | 0.710891325                       | 0.574290968              | 0.616873388     | 3.807909512                 | 0.998238073       | 2.130142817        |
| 245382_at           | AT4G17800 | 2.538779604                       | 2.318038614              | 2.27624268      | 5.855524668                 | 2.834002595       | 1.500800901        |
| 254697_at           | AT4G17970 | 0.591771843                       | 0.550161741              | 0.520052722     | 1.700747051                 | 0.712526968       | 0.640930338        |
| 254646_at           | AT4G18530 | 0.570750781                       | 0.48800415               | 0.574678708     | 1.65265306                  | 0.967825024       | 0.722706423        |

**Supplementary Tables pertaining to Figure 3**

**Supplementary Table S19. Loci enriched in individual cell types from microarray data**

**Loci enriched in Endodermis/Quiescent Center (SCR) from micorarray expression data analysis (1.7 fold, p <0.5)**

| Affymetrix Probeset | Locus     | Mean Microarray Expression Values |                          |                 |                             |                   |                    |
|---------------------|-----------|-----------------------------------|--------------------------|-----------------|-----------------------------|-------------------|--------------------|
|                     |           | Root Hairs (COBL9)                | Non-Hair Epidermis (WER) | Cortex (CORTEX) | Endodermis/ Quiescent (SCR) | Vasculature (WOL) | Columella (PET111) |
| 254580_at           | AT4G19390 | 0.682524784                       | 0.598586803              | 0.896792845     | 1.999009359                 | 0.765359109       | 1.021662358        |
| 254536_at           | AT4G19720 | 0.575694786                       | 0.461861031              | 0.529493528     | 1.574536826                 | 0.59417176        | 0.607606704        |
| 254506_at           | AT4G20140 | 0.68889663                        | 0.563550786              | 3.161381225     | 19.39275024                 | 1.829886981       | 0.923912863        |
| 254404_at           | AT4G21340 | 0.555602346                       | 0.474573358              | 0.570642871     | 5.487571492                 | 0.788947677       | 0.630147412        |
| 254408_at           | AT4G21390 | 0.420270935                       | 0.383246909              | 0.530932117     | 7.159868927                 | 0.626858444       | 0.515292731        |
| 254372_at           | AT4G21620 | 0.655022652                       | 0.529075081              | 0.605422527     | 3.036760506                 | 0.730922498       | 0.633101156        |
| 254344_at           | AT4G22110 | 0.83227274                        | 0.492149299              | 2.10268795      | 8.270853986                 | 1.286827374       | 0.822529489        |
| 254340_at           | AT4G22120 | 0.806603827                       | 0.890054402              | 2.328454812     | 6.927420219                 | 3.167425147       | 1.635415119        |
| 254300_at           | AT4G22780 | 0.570493091                       | 0.485408449              | 0.921377636     | 2.879825974                 | 1.137749939       | 0.928289758        |
| 254256_at           | AT4G23180 | 0.505231647                       | 0.474185418              | 1.711400924     | 5.913147039                 | 0.579081324       | 0.925625533        |
| 254201_at           | AT4G24130 | 0.469915754                       | 0.469627705              | 0.488042406     | 9.207101201                 | 0.843754367       | 0.581310808        |
| 254063_at           | AT4G25390 | 4.048397086                       | 2.457706675              | 5.537074008     | 10.73639628                 | 1.3966015         | 2.137894646        |
| 254081_at           | AT4G25660 | 3.613373207                       | 1.749871228              | 2.985105973     | 7.922638092                 | 2.27548819        | 2.308982875        |
| 254048_at           | AT4G25680 | 2.274284961                       | 1.824539729              | 2.08717962      | 10.57799498                 | 2.187110045       | 2.299619281        |
| 254042_at           | AT4G25810 | 1.339047316                       | 0.63142688               | 0.941232802     | 26.06861798                 | 4.748493146       | 4.806211912        |
| 254015_at           | AT4G26140 | 0.577464658                       | 0.703004765              | 0.850334907     | 18.29190886                 | 1.463971393       | 1.046917441        |
| 253999_at           | AT4G26200 | 1.250641234                       | 0.678170818              | 1.264697055     | 2.6281912                   | 0.77755071        | 0.670803443        |
| 253957_at           | AT4G26320 | 0.678230406                       | 1.025230461              | 3.501085549     | 26.37544333                 | 11.1042297        | 5.936814547        |
| 253828_at           | AT4G27970 | 0.95724175                        | 0.615069995              | 1.47218674      | 3.75677951                  | 1.046998416       | 0.951258612        |
| 253827_at           | AT4G28085 | 2.174151365                       | 2.922255874              | 2.041958833     | 5.655583713                 | 0.848795773       | 0.737892953        |
| 253819_at           | AT4G28350 | 0.858748278                       | 0.452650422              | 0.919112031     | 1.666443365                 | 0.609504294       | 0.617888249        |
| 253741_at           | AT4G28890 | 1.606939188                       | 1.077194684              | 1.259420809     | 3.178414897                 | 0.820958222       | 0.590553837        |
| 253754_at           | AT4G29020 | 1.131898011                       | 0.906641002              | 0.808433781     | 7.77777516                  | 1.464079833       | 1.059891718        |
| 253614_at           | AT4G30350 | 0.903978889                       | 0.529874365              | 1.368981124     | 4.647103277                 | 1.509731902       | 2.029455692        |
| 253478_at           | AT4G32350 | 0.605716403                       | 0.667084251              | 0.525313871     | 1.881322837                 | 0.860021422       | 0.935017535        |
| 253332_at           | AT4G33420 | 0.687917663                       | 0.434988014              | 0.794945709     | 6.857645377                 | 1.456629803       | 2.036864253        |
| 253276_at           | AT4G34050 | 7.98361503                        | 2.723526317              | 25.51166678     | 46.36201844                 | 20.10033394       | 15.01884882        |
| 253278_at           | AT4G34220 | 0.58983914                        | 0.498391324              | 0.554537663     | 3.776445219                 | 0.791523003       | 0.696212068        |
| 253239_at           | AT4G34500 | 2.156160021                       | 0.878642768              | 2.327076897     | 4.304586655                 | 1.40920528        | 1.67175431         |
| 253195_at           | AT4G35420 | 0.644612086                       | 0.518613755              | 0.531300901     | 1.613562483                 | 0.614238419       | 0.631707519        |
| 253120_at           | AT4G35790 | 4.93875729                        | 2.459365216              | 4.557016356     | 9.490980602                 | 3.046995527       | 2.718759009        |

**Supplementary Tables pertaining to Figure 3**

**Supplementary Table S19. Loci enriched in individual cell types from microarray data**

**Loci enriched in Endodermis/Quiescent Center (SCR) from micorarray expression data analysis (1.7 fold, p <0.5)**

| Affymetrix Probeset | Locus     | Mean Microarray Expression Values |                          |                 |                             |                   |                    |
|---------------------|-----------|-----------------------------------|--------------------------|-----------------|-----------------------------|-------------------|--------------------|
|                     |           | Root Hairs (COBL9)                | Non-Hair Epidermis (WER) | Cortex (CORTEX) | Endodermis/ Quiescent (SCR) | Vasculature (WOL) | Columella (PET111) |
| 253084_at           | AT4G36260 | 0.406019476                       | 0.418073276              | 0.430049453     | 1.221454242                 | 0.512563729       | 0.504843469        |
| 246228_at           | AT4G36430 | 0.838847477                       | 0.462048041              | 0.513224111     | 3.11853901                  | 0.550127995       | 0.489117251        |
| 246203_at           | AT4G36610 | 0.588935665                       | 0.483721162              | 0.619961505     | 1.339371502                 | 0.6968622         | 0.694340087        |
| 246214_at           | AT4G36990 | 2.351865638                       | 0.762643467              | 9.018689322     | 17.18893244                 | 2.416585823       | 3.493341617        |
| 253038_at           | AT4G37790 | 1.778980521                       | 0.75638621               | 2.363179858     | 4.683590211                 | 1.256098023       | 1.901348618        |
| 253024_at           | AT4G38080 | 0.406276491                       | 0.411012464              | 0.573863476     | 1.468980012                 | 0.505938046       | 0.483763914        |
| 252958_at           | AT4G38620 | 1.147214708                       | 0.503435883              | 5.794174824     | 13.02631097                 | 2.208158318       | 3.102641423        |
| 252950_at           | AT4G38690 | 0.506474127                       | 0.457433524              | 0.453263042     | 3.336626638                 | 0.677325366       | 0.532009168        |
| 252943_at           | AT4G39330 | 1.056852428                       | 0.663316293              | 0.747195957     | 4.837508572                 | 1.011718778       | 0.916045112        |
| 252862_at           | AT4G39830 | 0.601783534                       | 0.769612812              | 0.735999824     | 1.715149914                 | 0.689545142       | 0.806940874        |
| 251109_at           | AT5G01600 | 4.425562013                       | 1.289948589              | 5.515685321     | 14.75297434                 | 4.627091971       | 6.411896637        |
| 251061_at           | AT5G01830 | 1.800551973                       | 1.215453506              | 1.310730868     | 4.020311972                 | 1.30079021        | 0.94334544         |
| 251065_at           | AT5G01870 | 0.656965295                       | 0.58560875               | 0.54042122      | 10.70875748                 | 0.668660842       | 0.618272221        |
| 251042_at           | AT5G02310 | 1.880803041                       | 1.074556506              | 1.560481918     | 3.66536952                  | 1.793273899       | 1.68761218         |
| 245689_at           | AT5G04120 | 0.822918105                       | 3.256335188              | 7.470428615     | 13.71306493                 | 1.63019078        | 0.804463646        |
| 250823_at           | AT5G05180 | 0.33065935                        | 0.421308604              | 0.375727176     | 0.988949336                 | 0.475206621       | 0.430561002        |
| 250741_at           | AT5G05790 | 0.492256294                       | 0.459651946              | 0.517629349     | 4.357348057                 | 1.462739773       | 1.794173116        |
| 250717_at           | AT5G06200 | 0.857169866                       | 0.689675953              | 0.912722012     | 22.38225717                 | 2.174735566       | 0.996701912        |
| 250702_at           | AT5G06730 | 0.440783206                       | 0.396189446              | 0.442593506     | 1.411233615                 | 0.603945508       | 0.54719485         |
| 250701_at           | AT5G06839 | 1.466670417                       | 0.666888084              | 1.72420853      | 3.276325999                 | 0.909295506       | 0.837980555        |
| 250629_at           | AT5G07390 | 1.329199319                       | 0.550144371              | 0.589789068     | 2.503243846                 | 0.721438682       | 0.648218782        |
| 250597_at           | AT5G07680 | 0.489425339                       | 0.433920968              | 0.507528636     | 1.108762929                 | 0.601802046       | 0.566778963        |
| 250604_at           | AT5G07830 | 1.67561084                        | 0.699925114              | 3.229502153     | 8.583899803                 | 4.312464962       | 2.253795174        |
| 250500_at           | AT5G09530 | 0.436241606                       | 0.441015955              | 0.766600609     | 2.608854218                 | 0.574731891       | 0.532869885        |
| 250450_at           | AT5G10280 | 0.576265682                       | 0.459356413              | 1.004856249     | 4.562006015                 | 0.796711402       | 2.280244981        |
| 250443_at           | AT5G10520 | 0.763904931                       | 0.525157452              | 0.733045549     | 8.237398248                 | 1.137250266       | 1.099443769        |
| 250449_at           | AT5G10830 | 9.712391304                       | 7.67731793               | 8.610705502     | 18.50518481                 | 3.794203076       | 8.754553528        |
| 245898_at           | AT5G11020 | 0.564708022                       | 0.656727642              | 2.006880827     | 3.907066659                 | 0.901692547       | 0.624708092        |
| 250378_at           | AT5G11570 | 0.549927353                       | 0.438175222              | 0.577557839     | 1.550002013                 | 0.649228461       | 0.613143974        |
| 245181_at           | AT5G12420 | 0.418551615                       | 0.37388998               | 0.454989495     | 0.873907702                 | 0.493743668       | 0.501801912        |
| 250265_at           | AT5G12900 | 0.429582503                       | 0.393366313              | 0.467036475     | 3.845864961                 | 0.947955512       | 0.730473255        |



**Supplementary Tables pertaining to Figure 3**

**Supplementary Table S19. Loci enriched in individual cell types from microarray data**

**Loci enriched in Endodermis/Quiescent Center (SCR) from micorarray expression data analysis (1.7 fold, p <0.5)**

| Affymetrix Probeset | Locus     | Mean Microarray Expression Values |                          |                 |                             |                   |                    |
|---------------------|-----------|-----------------------------------|--------------------------|-----------------|-----------------------------|-------------------|--------------------|
|                     |           | Root Hairs (COBL9)                | Non-Hair Epidermis (WER) | Cortex (CORTEX) | Endodermis/ Quiescent (SCR) | Vasculature (WOL) | Columella (PET111) |
| 250230_at           | AT5G13900 | 0.827076676                       | 0.487897625              | 0.494795301     | 2.063064447                 | 0.58075655        | 0.613652203        |
| 250165_at           | AT5G15290 | 0.590029713                       | 0.528736499              | 0.966889224     | 28.10461027                 | 3.358604125       | 1.091868904        |
| 246516_at           | AT5G15740 | 1.190392125                       | 2.569563116              | 0.964031633     | 5.197001296                 | 1.363931452       | 1.315447744        |
| 246535_at           | AT5G15900 | 0.515504852                       | 0.452583281              | 0.577466544     | 3.085167523                 | 1.001503986       | 0.708708908        |
| 250001_at           | AT5G18680 | 5.544249153                       | 1.702083457              | 3.71343386      | 18.05958387                 | 2.441828501       | 2.73822729         |
| 246041_at           | AT5G19290 | 1.107996406                       | 2.63203076               | 2.022488289     | 10.10022719                 | 3.201944766       | 2.583761293        |
| 245965_at           | AT5G19730 | 0.768478529                       | 0.559702096              | 0.64435671      | 2.927203395                 | 1.096255447       | 1.442334311        |
| 246000_at           | AT5G20820 | 0.515436327                       | 0.439868443              | 1.287503719     | 2.715865607                 | 0.899955247       | 0.726978785        |
| 249941_at           | AT5G22270 | 0.737482773                       | 0.619523426              | 0.684244585     | 1.699347334                 | 0.708011871       | 0.84033902         |
| 249914_at           | AT5G22850 | 2.093913106                       | 1.346862458              | 3.417243812     | 7.805886719                 | 3.972043973       | 2.943667223        |
| 249811_at           | AT5G23760 | 0.377068473                       | 0.420897083              | 0.588385943     | 2.798143248                 | 0.686682977       | 0.639559828        |
| 249791_at           | AT5G23810 | 0.625233515                       | 0.53436429               | 0.648635841     | 1.625475959                 | 0.831498163       | 0.788825217        |
| 249810_at           | AT5G23920 | 1.17206127                        | 0.796242057              | 1.314750773     | 11.08591505                 | 2.123311345       | 1.532325506        |
| 246970_at           | AT5G24900 | 0.537419203                       | 0.475360966              | 0.500408931     | 1.297521019                 | 0.70503784        | 0.684303098        |
| 246908_at           | AT5G25610 | 0.647388031                       | 0.459568386              | 0.5154901       | 1.875637963                 | 0.61693295        | 0.62035258         |
| 246909_at           | AT5G25770 | 3.55469754                        | 0.856059555              | 4.866908389     | 12.27543393                 | 2.822087061       | 2.580078219        |
| 246826_at           | AT5G26310 | 0.635757596                       | 0.523918753              | 1.425486153     | 12.98746208                 | 1.088820238       | 0.718177368        |
| 255945_at           | AT5G28610 | 0.51057205                        | 0.386386111              | 0.580834153     | 0.99238167                  | 0.465266304       | 0.474817125        |
| 246608_at           | AT5G35380 | 0.437551407                       | 0.444514311              | 0.401632197     | 1.536804057                 | 0.491844267       | 0.487802454        |
| 249705_at           | AT5G35580 | 1.27681523                        | 0.498062938              | 0.593685196     | 7.938895844                 | 1.846090661       | 1.398549603        |
| 249626_at           | AT5G37540 | 1.052340049                       | 0.644096089              | 5.2065942       | 15.32526764                 | 2.784941167       | 3.332818754        |
| 249622_at           | AT5G37550 | 0.792262721                       | 0.459334289              | 1.172741062     | 5.797557927                 | 1.175982837       | 0.864336247        |
| 249403_at           | AT5G40270 | 0.643695089                       | 0.480581208              | 0.427543008     | 3.471830233                 | 0.740148067       | 0.62248739         |
| 249289_at           | AT5G41040 | 0.559688368                       | 0.476142018              | 0.608489452     | 5.413961354                 | 0.921115772       | 0.648054728        |
| 249279_at           | AT5G41920 | 0.824936325                       | 0.574596945              | 1.034119614     | 2.283722713                 | 0.925558375       | 0.925823371        |
| 249231_at           | AT5G42030 | 0.548726735                       | 0.460705721              | 1.133612542     | 2.426693246                 | 0.849565667       | 0.765590417        |
| 249227_at           | AT5G42180 | 0.584900583                       | 0.541517299              | 1.466686152     | 44.93166719                 | 4.66829358        | 1.384994747        |
| 249208_at           | AT5G42650 | 5.28536655                        | 1.762780485              | 12.13284016     | 20.83813338                 | 6.020671021       | 8.880580627        |
| 249148_at           | AT5G43260 | 1.630814862                       | 0.828715056              | 1.930654554     | 4.741409323                 | 1.228528962       | 1.174411238        |
| 249123_at           | AT5G43760 | 1.628826261                       | 2.020926375              | 4.440951328     | 9.423170941                 | 2.401764202       | 1.00061519         |
| 249093_at           | AT5G43880 | 1.193065429                       | 0.974111795              | 1.623031786     | 6.250557529                 | 1.37446           | 1.114925491        |

**Supplementary Tables pertaining to Figure 3**

**Supplementary Table S19. Loci enriched in individual cell types from microarray data**

**Loci enriched in Endodermis/Quiescent Center (SCR) from micorarray expression data analysis (1.7 fold, p <0.5)**

| Affymetrix Probeset | Locus     | Mean Microarray Expression Values |                          |                 |                             |                   |                    |
|---------------------|-----------|-----------------------------------|--------------------------|-----------------|-----------------------------|-------------------|--------------------|
|                     |           | Root Hairs (COBL9)                | Non-Hair Epidermis (WER) | Cortex (CORTEX) | Endodermis/ Quiescent (SCR) | Vasculature (WOL) | Columella (PET111) |
| 249013_at           | AT5G44700 | 0.435332431                       | 0.402251264              | 0.490109342     | 2.134688301                 | 0.589149959       | 0.48722492         |
| 248989_at           | AT5G45200 | 0.451731664                       | 0.414443785              | 0.452627641     | 1.143787975                 | 0.58140065        | 0.495969656        |
| 248990_at           | AT5G45210 | 0.401640177                       | 0.413228897              | 0.439237162     | 2.551278061                 | 0.772304276       | 0.505534512        |
| 248912_at           | AT5G45670 | 0.460726113                       | 0.415525348              | 0.414595861     | 1.494307165                 | 0.516239196       | 0.49068298         |
| 248908_at           | AT5G45800 | 0.508190344                       | 0.57400639               | 0.57553437      | 10.98442653                 | 1.5023555         | 0.768474763        |
| 248838_at           | AT5G46800 | 3.342316366                       | 3.660265083              | 6.03348541      | 15.56737082                 | 5.103109144       | 2.903139572        |
| 248794_at           | AT5G47220 | 2.603550824                       | 0.619358421              | 1.414896835     | 4.945198702                 | 1.167305208       | 2.507903518        |
| 248750_at           | AT5G47530 | 0.757181311                       | 0.628921246              | 0.759660892     | 10.16682806                 | 1.281965945       | 1.208432959        |
| 248761_at           | AT5G47635 | 0.52417601                        | 0.519090137              | 0.493940282     | 2.153722568                 | 0.671634747       | 0.842686728        |
| 248639_at           | AT5G48930 | 4.042212458                       | 1.436478827              | 4.647175963     | 19.40978676                 | 6.352591891       | 4.619889518        |
| 248428_at           | AT5G51760 | 0.712982062                       | 0.585530764              | 0.609485536     | 1.869685431                 | 0.765112212       | 0.729856394        |
| 248316_at           | AT5G52670 | 0.393609087                       | 0.380261266              | 0.414875719     | 1.065089457                 | 0.433985462       | 0.4040314          |
| 248327_at           | AT5G52750 | 0.575269502                       | 0.463028552              | 0.518861417     | 1.342366806                 | 0.672346285       | 0.628595343        |
| 248254_at           | AT5G53320 | 0.392161624                       | 0.427858254              | 0.493379454     | 6.339821186                 | 0.806415547       | 0.57724516         |
| 248218_at           | AT5G53710 | 0.622597597                       | 0.440448826              | 0.59242081      | 1.68955368                  | 0.719150646       | 0.605712419        |
| 248209_at           | AT5G53990 | 0.536477898                       | 0.60436786               | 0.715312711     | 1.778622567                 | 0.657595118       | 0.603768057        |
| 248108_at           | AT5G55130 | 2.577118074                       | 2.906353842              | 2.647202128     | 10.87209244                 | 4.455130315       | 2.846883844        |
| 248025_at           | AT5G55850 | 4.442835644                       | 2.423729475              | 3.260997316     | 7.835344                    | 2.241304416       | 2.480259135        |
| 248004_at           | AT5G56230 | 1.558722489                       | 0.687355365              | 1.354304329     | 4.870612369                 | 1.221947687       | 1.204723656        |
| 247925_at           | AT5G57560 | 7.215903535                       | 2.829922162              | 5.499273604     | 29.66455219                 | 9.948683992       | 8.701098904        |
| 247868_at           | AT5G57620 | 0.548306055                       | 0.491486893              | 0.735407547     | 10.73994375                 | 1.181321003       | 0.776562569        |
| 247884_at           | AT5G57800 | 1.41183538                        | 2.226010562              | 0.912585113     | 3.830698676                 | 0.976647044       | 1.160092606        |
| 247795_at           | AT5G58620 | 0.825107251                       | 0.710190468              | 0.663346527     | 2.213491693                 | 0.805850154       | 0.73665462         |
| 247717_at           | AT5G59320 | 0.614202387                       | 0.438581903              | 0.463471426     | 8.530994709                 | 0.636364539       | 0.621982661        |
| 247707_at           | AT5G59450 | 0.989943478                       | 1.613866983              | 2.168451157     | 4.126890524                 | 0.851242891       | 1.237444032        |
| 247727_at           | AT5G59490 | 5.125431697                       | 1.187736539              | 7.023225493     | 19.71094939                 | 3.283909043       | 3.866332973        |
| 247522_at           | AT5G61340 | 1.745786413                       | 1.383677714              | 4.483865118     | 12.88205914                 | 3.098533737       | 3.603180916        |
| 247493_at           | AT5G61900 | 2.161973647                       | 1.009433508              | 3.579820901     | 6.12846461                  | 1.444463539       | 2.801023449        |
| 247464_at           | AT5G62070 | 0.742387375                       | 0.534981019              | 1.165338952     | 3.023855015                 | 1.171058341       | 0.983241345        |
| 247354_at           | AT5G63590 | 0.997403176                       | 0.600646949              | 1.447830472     | 5.585707599                 | 1.013514754       | 0.822504959        |
| 247337_at           | AT5G63660 | 0.448230807                       | 0.523829191              | 2.530530682     | 9.504412877                 | 4.889378606       | 0.712871409        |

**Supplementary Tables pertaining to Figure 3**

**Supplementary Table S19. Loci enriched in individual cell types from microarray data**

**Loci enriched in Endodermis/Quiescent Center (SCR) from micorarray expression data analysis (1.7 fold, p <0.5)**

| Affymetrix Probeset | Locus     | Mean Microarray Expression Values |                          |                 |                             |                   |                    |
|---------------------|-----------|-----------------------------------|--------------------------|-----------------|-----------------------------|-------------------|--------------------|
|                     |           | Root Hairs (COBL9)                | Non-Hair Epidermis (WER) | Cortex (CORTEX) | Endodermis/ Quiescent (SCR) | Vasculature (WOL) | Columella (PET111) |
| 247261_at           | AT5G64460 | 1.336053376                       | 1.757556143              | 3.531172312     | 6.298579201                 | 2.95056846        | 2.273606481        |
| 247266_at           | AT5G64570 | 0.484675556                       | 0.399103647              | 4.390107257     | 8.608475839                 | 3.449591427       | 1.210048251        |
| 247169_at           | AT5G65520 | 0.809582171                       | 1.154265843              | 0.892147805     | 2.313744995                 | 1.032562244       | 0.806123671        |
| 247170_at           | AT5G65530 | 0.574238029                       | 0.482144351              | 0.851478402     | 31.9424287                  | 2.556019347       | 0.917260146        |
| 247149_at           | AT5G65660 | 8.410872753                       | 4.944022529              | 6.719014472     | 20.89233456                 | 4.463871269       | 5.867642227        |
| 247165_at           | AT5G65790 | 0.403104289                       | 0.394118735              | 0.460975906     | 3.154572851                 | 0.612072009       | 0.502585332        |
| 247091_at           | AT5G66390 | 0.410058024                       | 0.411519753              | 0.896197851     | 43.3199995                  | 3.50415951        | 1.017161239        |
| 247095_at           | AT5G66400 | 0.570880756                       | 0.468692477              | 0.436448928     | 1.330803455                 | 0.563538416       | 0.499738125        |
| 247072_at           | AT5G66490 | 0.543166308                       | 0.394974691              | 0.795108312     | 1.575364401                 | 0.540444752       | 0.512116636        |
| 247048_at           | AT5G66560 | 0.733934517                       | 1.112027524              | 1.503135355     | 2.737081961                 | 1.482416987       | 1.262996657        |
| 246988_at           | AT5G67340 | 0.666026385                       | 0.500505566              | 0.739543111     | 7.154787935                 | 0.713143394       | 0.626053709        |
| 246998_at           | AT5G67370 | 0.468562851                       | 0.479469498              | 1.239311703     | 2.870523359                 | 0.683046653       | 0.619486178        |

**Supplementary Tables pertaining to Figure 3**

**Supplementary Table S19. Loci enriched in individual cell types from microarray data**

**Loci enriched in Vasculature (WOL) from micorarray expression data analysis (1.7 fold, p <0.5)**

| Affymetrix Probeset | Locus     | Mean Microarray Expression Values |                          |                 |                             |                   |                    |
|---------------------|-----------|-----------------------------------|--------------------------|-----------------|-----------------------------|-------------------|--------------------|
|                     |           | Root Hairs (COBL9)                | Non-Hair Epidermis (WER) | Cortex (CORTEX) | Endodermis/ Quiescent (SCR) | Vasculature (WOL) | Columella (PET111) |
| 261559_at           | AT1G01780 | 1.372885701                       | 1.246358915              | 0.636122139     | 0.956010811                 | 2.719128617       | 1.233922443        |
| 264605_at           | AT1G04550 | 0.339633787                       | 0.392053334              | 0.461659948     | 0.643038282                 | 1.261664576       | 0.573866727        |
| 261256_at           | AT1G05760 | 0.55841606                        | 0.57320544               | 0.612988304     | 0.667918721                 | 1.335017049       | 0.586295676        |
| 264342_at           | AT1G12080 | 2.031368935                       | 0.543397081              | 0.543735386     | 2.4452331                   | 8.175110367       | 1.873321589        |
| 262802_at           | AT1G20930 | 0.571592345                       | 1.208686713              | 0.687516089     | 1.053627043                 | 2.167362205       | 0.82838451         |
| 261500_at           | AT1G28400 | 0.399866355                       | 0.359837524              | 0.523246251     | 1.613388956                 | 3.168086433       | 1.213895802        |
| 260027_at           | AT1G29950 | 0.488750942                       | 0.554784237              | 0.659313175     | 0.965246706                 | 4.082156611       | 1.27498335         |
| 261239_at           | AT1G32930 | 1.33052134                        | 1.168241644              | 1.151045497     | 1.54461168                  | 2.934606647       | 1.581506462        |
| 245739_at           | AT1G44110 | 0.864059665                       | 1.411372479              | 0.822976679     | 1.239293953                 | 2.481464851       | 1.065622998        |
| 265144_at           | AT1G51170 | 0.560491488                       | 0.485635147              | 0.688382689     | 0.845580534                 | 1.574662806       | 0.910531529        |
| 265060_at           | AT1G52150 | 0.52614825                        | 0.54640729               | 0.736720981     | 0.90155852                  | 5.171015146       | 1.237850461        |
| 264277_at           | AT1G60390 | 0.8516799                         | 0.560232939              | 0.723091818     | 1.926910708                 | 3.357865037       | 1.878389994        |
| 261957_at           | AT1G64660 | 0.493652344                       | 0.495947218              | 1.23122912      | 2.254753492                 | 6.53002661        | 1.072746574        |
| 260460_at           | AT1G68230 | 0.441261565                       | 0.422197925              | 0.463294519     | 0.514940147                 | 1.12704211        | 0.505238729        |
| 260034_at           | AT1G68810 | 0.44228112                        | 0.446105421              | 0.55242029      | 0.757251669                 | 5.084891847       | 1.512110595        |
| 259371_at           | AT1G69080 | 0.682145917                       | 0.641395453              | 0.662934549     | 1.121510519                 | 1.927692924       | 1.064303657        |
| 261521_at           | AT1G71830 | 1.145934828                       | 1.318356793              | 2.744725406     | 1.994856856                 | 5.453186722       | 2.456076587        |
| 262380_at           | AT1G72810 | 0.701864229                       | 0.678631721              | 0.828034366     | 1.445190427                 | 2.955011018       | 1.241174048        |
| 245725_at           | AT1G73370 | 0.949213035                       | 0.699955942              | 0.987874499     | 1.34786552                  | 2.930927167       | 1.176026024        |
| 259845_at           | AT1G73590 | 0.487984325                       | 0.703257517              | 0.639713019     | 1.355269884                 | 3.610757418       | 1.306435661        |
| 260067_at           | AT1G73780 | 0.398622644                       | 0.44196284               | 0.437747118     | 0.527163212                 | 3.601730811       | 0.86255075         |
| 259904_at           | AT1G74150 | 0.446518275                       | 0.455290823              | 0.434970821     | 0.501958796                 | 0.92120851        | 0.487112831        |
| 260250_at           | AT1G74260 | 1.253318447                       | 3.694789119              | 2.2338839       | 3.779412714                 | 6.662666609       | 2.07089803         |
| 262951_at           | AT1G75500 | 0.642480274                       | 0.527995986              | 1.281244652     | 3.225088546                 | 10.80759749       | 2.067526458        |
| 264947_at           | AT1G77020 | 0.355887272                       | 0.364029578              | 0.493888802     | 0.968102885                 | 2.232159774       | 0.987244099        |
| 259759_at           | AT1G77550 | 0.857038431                       | 2.494774279              | 1.083088922     | 2.056578292                 | 4.311988354       | 1.852236969        |
| 259680_at           | AT1G77690 | 0.550452613                       | 0.623746361              | 1.563508068     | 2.679527885                 | 14.56382511       | 3.753424307        |
| 259674_at           | AT1G77700 | 0.634381292                       | 0.529202954              | 0.628241233     | 0.812668848                 | 1.50446101        | 0.678871383        |
| 260801_at           | AT1G78430 | 0.469747345                       | 0.491269437              | 0.479158609     | 0.724098494                 | 1.410404648       | 0.591837616        |
| 261345_at           | AT1G79760 | 0.57346788                        | 0.433009905              | 0.484109594     | 0.580726087                 | 1.118088097       | 0.543960142        |
| 262041_at           | AT1G80100 | 0.749600531                       | 0.546011108              | 0.624816034     | 0.714254651                 | 1.439843442       | 0.694545994        |

**Supplementary Tables pertaining to Figure 3**

**Supplementary Table S19. Loci enriched in individual cell types from microarray data**

**Loci enriched in Vasculature (WOL) from micorarray expression data analysis (1.7 fold, p <0.5)**

| Affymetrix Probeset | Locus     | Mean Microarray Expression Values |                          |                 |                             |                   |                    |
|---------------------|-----------|-----------------------------------|--------------------------|-----------------|-----------------------------|-------------------|--------------------|
|                     |           | Root Hairs (COBL9)                | Non-Hair Epidermis (WER) | Cortex (CORTEX) | Endodermis/ Quiescent (SCR) | Vasculature (WOL) | Columella (PET111) |
| 265249_at           | AT2G01940 | 0.444069427                       | 0.411051606              | 0.453853085     | 0.586348258                 | 2.795869161       | 0.721772181        |
| 265250_at           | AT2G01950 | 0.497549203                       | 0.462928414              | 0.477225923     | 0.622016422                 | 2.342094175       | 0.735028714        |
| 266770_at           | AT2G03090 | 1.537102861                       | 1.881019789              | 1.217191875     | 1.774788191                 | 9.555417877       | 3.033321674        |
| 263629_at           | AT2G04850 | 0.622936115                       | 0.660869218              | 0.712933335     | 0.863929668                 | 5.518011764       | 2.572628181        |
| 266038_at           | AT2G07680 | 0.621095876                       | 0.529648882              | 0.60132802      | 0.889484169                 | 1.742497132       | 0.838882691        |
| 265656_at           | AT2G13820 | 0.730041301                       | 0.701500496              | 1.310315529     | 3.540697433                 | 11.33284634       | 4.548500653        |
| 263017_at           | AT2G17620 | 0.58207466                        | 0.781967488              | 0.706265335     | 0.810073455                 | 1.56006712        | 0.748180163        |
| 265813_at           | AT2G18060 | 0.427244939                       | 0.4019176                | 0.436593929     | 0.490342206                 | 1.55136988        | 0.747766841        |
| 265378_at           | AT2G18380 | 0.665296309                       | 0.539979495              | 0.571092716     | 0.608682928                 | 1.299764499       | 0.616935728        |
| 264377_at           | AT2G25060 | 1.071197708                       | 2.887315062              | 1.561163423     | 2.339116826                 | 5.69867304        | 1.299943428        |
| 267613_at           | AT2G26700 | 0.37845967                        | 0.405168426              | 0.400518301     | 0.452790426                 | 0.865179703       | 0.453806731        |
| 267619_at           | AT2G26730 | 0.559910072                       | 0.565351177              | 1.689281303     | 2.233293272                 | 4.662284992       | 1.618735746        |
| 265277_at           | AT2G28410 | 0.70887806                        | 0.587832807              | 0.690932971     | 1.008783224                 | 3.925298151       | 1.268321586        |
| 267299_at           | AT2G30150 | 0.713281614                       | 0.897827625              | 1.020475265     | 1.218052144                 | 2.870304078       | 1.124316232        |
| 263470_at           | AT2G31900 | 0.527798961                       | 0.462850964              | 0.471324441     | 0.577487295                 | 1.530991218       | 0.775608321        |
| 266358_at           | AT2G32280 | 0.863727921                       | 0.658381482              | 2.509730956     | 1.76696411                  | 4.912194998       | 1.185901146        |
| 256713_at           | AT2G34060 | 0.919391167                       | 0.633164032              | 0.760968197     | 0.69627476                  | 2.242633798       | 1.026513708        |
| 267316_at           | AT2G34710 | 0.60912818                        | 0.66091305               | 0.866048416     | 1.311081046                 | 5.148852117       | 2.540154419        |
| 263913_at           | AT2G36570 | 0.551055391                       | 0.522365179              | 0.500731401     | 0.642019628                 | 1.418806655       | 0.675135881        |
| 265468_at           | AT2G37210 | 0.632025266                       | 0.545806369              | 0.644202161     | 0.740341393                 | 1.990823645       | 0.763039956        |
| 266007_at           | AT2G37380 | 0.57812032                        | 0.662886105              | 0.691525187     | 1.020155888                 | 1.81583199        | 0.7482854          |
| 266187_at           | AT2G38970 | 0.505707387                       | 0.67100104               | 1.063647155     | 1.029890841                 | 2.288831941       | 1.245731347        |
| 255876_at           | AT2G40480 | 0.477002699                       | 0.497835033              | 0.530557528     | 0.66337822                  | 1.712474505       | 0.859267623        |
| 251395_at           | AT2G45470 | 0.753580807                       | 3.056432076              | 1.473096861     | 2.912933526                 | 8.089152484       | 3.344782803        |
| 258952_at           | AT3G01410 | 0.908762944                       | 1.162716014              | 0.807466375     | 1.123229048                 | 2.005574634       | 1.118250877        |
| 259308_at           | AT3G05180 | 0.442089181                       | 0.420552728              | 0.461317056     | 0.518517147                 | 1.238099538       | 0.723753334        |
| 259022_at           | AT3G07420 | 0.666839027                       | 0.527394741              | 0.653276235     | 0.932850659                 | 1.712709559       | 0.719118134        |
| 258672_at           | AT3G08570 | 0.66842709                        | 0.607021292              | 0.613080341     | 0.766738561                 | 1.52245296        | 0.883872524        |
| 258938_at           | AT3G10080 | 0.600156101                       | 0.487607701              | 0.545482361     | 0.847472959                 | 4.931823317       | 2.056106459        |
| 259290_at           | AT3G11520 | 0.878070364                       | 1.283067003              | 0.858242104     | 1.545130143                 | 2.627805267       | 1.042631573        |
| 256275_at           | AT3G12110 | 1.615390329                       | 2.099783026              | 2.300072948     | 2.502932284                 | 6.792634662       | 2.936291309        |

**Supplementary Tables pertaining to Figure 3**

**Supplementary Table S19. Loci enriched in individual cell types from microarray data**

**Loci enriched in Vasculature (WOL) from micorarray expression data analysis (1.7 fold, p <0.5)**

| Affymetrix Probeset | Locus     | Mean Microarray Expression Values |                          |                 |                             |                   |                    |
|---------------------|-----------|-----------------------------------|--------------------------|-----------------|-----------------------------|-------------------|--------------------|
|                     |           | Root Hairs (COBL9)                | Non-Hair Epidermis (WER) | Cortex (CORTEX) | Endodermis/ Quiescent (SCR) | Vasculature (WOL) | Columella (PET111) |
| 258222_at           | AT3G15680 | 0.582511269                       | 0.454694216              | 0.571030904     | 0.804607473                 | 1.928199469       | 0.579889394        |
| 258252_at           | AT3G15720 | 0.425988819                       | 0.527385428              | 0.469583805     | 0.802378415                 | 1.37134679        | 0.466098984        |
| 257229_at           | AT3G16490 | 0.50108231                        | 0.77830343               | 0.661420632     | 0.665254757                 | 1.369702487       | 0.680784311        |
| 258414_at           | AT3G17380 | 0.404669035                       | 0.405137997              | 0.412864889     | 0.572856232                 | 1.079348408       | 0.446127304        |
| 258010_at           | AT3G19300 | 0.641481227                       | 0.745403645              | 0.708018903     | 0.996680097                 | 1.822850126       | 0.999093863        |
| 256818_at           | AT3G21420 | 0.813860373                       | 0.606872369              | 0.696156907     | 0.71065703                  | 1.773111308       | 0.867452453        |
| 256899_at           | AT3G24660 | 0.435789107                       | 0.676915935              | 0.561104378     | 1.84609629                  | 4.876782068       | 1.711329307        |
| 257642_at           | AT3G25710 | 0.401684006                       | 0.408724261              | 0.427366832     | 0.576819014                 | 2.200280373       | 0.61330307         |
| 257613_at           | AT3G26610 | 0.767654688                       | 0.50472096               | 0.69358975      | 2.02230029                  | 4.036102336       | 1.446004651        |
| 256564_at           | AT3G29770 | 0.604172568                       | 0.593752279              | 0.880148108     | 0.951789008                 | 2.804814748       | 1.233037019        |
| 252765_at           | AT3G42800 | 0.472340061                       | 0.406437755              | 0.456291078     | 0.462098486                 | 3.457657793       | 0.624567804        |
| 252691_at           | AT3G44050 | 0.317994525                       | 0.709683705              | 0.401639168     | 0.687867493                 | 1.210030447       | 0.442249408        |
| 252425_at           | AT3G47620 | 0.514216619                       | 0.505182565              | 0.698246657     | 1.100633629                 | 2.597735299       | 1.062214949        |
| 252352_at           | AT3G48185 | 0.586543543                       | 0.427295081              | 0.639625806     | 0.808797059                 | 4.022802109       | 0.90274202         |
| 252322_at           | AT3G48550 | 0.466072279                       | 0.430068224              | 0.435297639     | 0.528924859                 | 1.488537243       | 0.557115331        |
| 252296_at           | AT3G48970 | 0.553157621                       | 0.439839774              | 0.577428098     | 1.159813303                 | 2.208052641       | 0.969054942        |
| 252119_at           | AT3G51030 | 0.711112556                       | 0.667267198              | 0.93909198      | 1.191786796                 | 6.808987529       | 2.362524737        |
| 252080_at           | AT3G51670 | 0.75454331                        | 1.483261543              | 1.020834087     | 1.359294791                 | 13.41430964       | 3.039716489        |
| 251982_at           | AT3G53190 | 1.071619052                       | 1.7692288                | 2.161619395     | 4.136107673                 | 9.430565911       | 1.933353473        |
| 251920_at           | AT3G53900 | 0.741197759                       | 1.105605075              | 0.84410575      | 1.52884639                  | 2.693868601       | 0.980780038        |
| 251889_at           | AT3G54080 | 1.190967767                       | 1.483567963              | 1.486612212     | 1.637785098                 | 3.496531285       | 1.987787456        |
| 251886_at           | AT3G54260 | 0.872792436                       | 1.055894476              | 0.853060393     | 2.173632109                 | 6.803234846       | 1.75340479         |
| 251688_at           | AT3G56480 | 0.610288376                       | 0.530715261              | 0.646526552     | 1.570504674                 | 3.190343613       | 0.922088646        |
| 246346_at           | AT3G56810 | 0.449126572                       | 0.419802571              | 0.515368774     | 0.740338                    | 1.689735708       | 0.572470167        |
| 251574_at           | AT3G58100 | 0.742912667                       | 0.886360584              | 1.19136634      | 1.069763612                 | 2.258050392       | 0.978480822        |
| 251556_at           | AT3G58840 | 1.448085931                       | 2.46245383               | 1.59328948      | 1.968546935                 | 4.403312835       | 2.136321201        |
| 251517_at           | AT3G59370 | 0.301261782                       | 0.364026484              | 0.371930277     | 1.234818917                 | 3.053757979       | 0.614789259        |
| 251244_at           | AT3G62060 | 0.647502698                       | 0.877816085              | 0.89672204      | 1.056532531                 | 2.077346303       | 1.023527471        |
| 255664_at           | AT4G00440 | 0.994011645                       | 0.730305564              | 0.734033679     | 1.380337661                 | 4.198203586       | 1.432428183        |
| 255433_at           | AT4G03210 | 0.522199644                       | 0.510059423              | 0.674501972     | 1.164867042                 | 2.166994417       | 0.830541305        |
| 255003_at           | AT4G09950 | 0.466242901                       | 0.45199291               | 0.406117247     | 0.578639937                 | 1.203075768       | 0.485049705        |

**Supplementary Tables pertaining to Figure 3**

**Supplementary Table S19. Loci enriched in individual cell types from microarray data**

**Loci enriched in Vasculature (WOL) from micorarray expression data analysis (1.7 fold, p <0.5)**

| Affymetrix Probeset | Locus     | Mean Microarray Expression Values |                          |                 |                             |                   |                    |
|---------------------|-----------|-----------------------------------|--------------------------|-----------------|-----------------------------|-------------------|--------------------|
|                     |           | Root Hairs (COBL9)                | Non-Hair Epidermis (WER) | Cortex (CORTEX) | Endodermis/ Quiescent (SCR) | Vasculature (WOL) | Columella (PET111) |
| 254810_at           | AT4G12390 | 0.823470036                       | 0.58461502               | 0.988969817     | 3.448243861                 | 8.228620046       | 2.044775919        |
| 254823_at           | AT4G12580 | 0.399039671                       | 0.347187053              | 0.403963681     | 0.523016389                 | 1.125603252       | 0.579370168        |
| 245568_at           | AT4G14650 | 0.562590732                       | 0.553618552              | 0.682328756     | 0.899734023                 | 1.548716081       | 0.832441194        |
| 245576_at           | AT4G14770 | 0.803369611                       | 1.212996819              | 0.808806425     | 1.029523468                 | 2.713621354       | 0.999948272        |
| 245584_at           | AT4G14940 | 0.566319463                       | 1.399919368              | 0.575850967     | 2.042868792                 | 6.701824751       | 3.295618556        |
| 245343_at           | AT4G15830 | 0.510916654                       | 1.54558859               | 0.70187051      | 1.428957495                 | 3.043677496       | 0.773635868        |
| 254515_at           | AT4G20270 | 0.553805022                       | 0.412584539              | 0.48431986      | 0.976930706                 | 1.877981703       | 0.798665185        |
| 254466_at           | AT4G20430 | 0.60547349                        | 0.523436194              | 0.579583456     | 0.693023757                 | 3.030059091       | 0.797970054        |
| 254402_at           | AT4G21310 | 0.757852195                       | 0.74230991               | 0.710707214     | 0.782882099                 | 1.952192111       | 1.011010068        |
| 254328_at           | AT4G22570 | 0.596138163                       | 0.516141545              | 1.298262159     | 2.228927671                 | 5.958363985       | 1.688914181        |
| 254119_at           | AT4G24780 | 1.068660005                       | 6.109534848              | 2.962900879     | 4.240523013                 | 14.08239518       | 6.250543056        |
| 253818_at           | AT4G28330 | 0.534894143                       | 0.450833376              | 0.502805777     | 0.564628392                 | 1.093684259       | 0.622578069        |
| 253620_at           | AT4G30520 | 0.68864589                        | 0.590688231              | 0.635137961     | 0.783136978                 | 2.303010424       | 0.72185411         |
| 253498_at           | AT4G31890 | 0.695969406                       | 0.716313418              | 0.71713024      | 0.649735801                 | 1.524674437       | 0.83247349         |
| 253076_at           | AT4G36160 | 0.506518109                       | 0.404896373              | 0.493794647     | 0.544507122                 | 2.135518164       | 1.201084733        |
| 246274_at           | AT4G36620 | 0.611910345                       | 0.702447651              | 0.617191204     | 0.868080149                 | 1.613587979       | 0.74717874         |
| 253045_at           | AT4G37445 | 0.56748852                        | 0.512143776              | 0.54112376      | 0.782710764                 | 1.420261704       | 0.647381258        |
| 253056_at           | AT4G37650 | 0.600895086                       | 0.508301734              | 0.656900386     | 1.885985497                 | 6.183999133       | 1.052966914        |
| 252954_at           | AT4G38660 | 0.633938535                       | 2.531534342              | 1.158422452     | 2.102667                    | 6.122557643       | 2.953332441        |
| 251113_at           | AT5G01370 | 0.507536887                       | 0.426950077              | 0.48428533      | 0.5511047                   | 1.250193012       | 0.585646464        |
| 251075_at           | AT5G01890 | 7.619161016                       | 5.043728946              | 1.753831172     | 2.194537529                 | 14.67295108       | 5.751847682        |
| 251021_at           | AT5G02140 | 0.565745444                       | 0.548705329              | 0.549356756     | 0.615919084                 | 1.706036742       | 0.598140421        |
| 251009_at           | AT5G02640 | 1.130621534                       | 0.623201946              | 0.796478204     | 0.957988152                 | 6.450447141       | 2.514404878        |
| 250872_at           | AT5G03960 | 0.506325651                       | 0.525269506              | 0.581637862     | 0.713523887                 | 3.254712267       | 0.936849486        |
| 246956_at           | AT5G04890 | 0.663303752                       | 0.553246945              | 0.820854175     | 1.305692185                 | 3.348469427       | 0.713065202        |
| 250752_at           | AT5G05690 | 0.498687082                       | 0.455701464              | 1.084214274     | 1.184458522                 | 9.572112938       | 2.149987175        |
| 250661_at           | AT5G07030 | 0.521544891                       | 0.643130654              | 0.731484646     | 1.906462545                 | 4.773493435       | 1.603303568        |
| 250517_at           | AT5G08260 | 0.889598779                       | 0.828806586              | 0.887719471     | 1.500603165                 | 4.947843795       | 1.372579279        |
| 245883_at           | AT5G09500 | 0.774771037                       | 0.916667943              | 0.612501186     | 0.697264732                 | 1.623197669       | 0.678889843        |
| 245903_at           | AT5G11100 | 0.568972824                       | 0.578317945              | 0.515801146     | 0.624275182                 | 1.671244474       | 0.707161595        |
| 250333_at           | AT5G11690 | 0.732131975                       | 1.061774479              | 0.845770822     | 1.058460233                 | 2.093442783       | 0.961727549        |

**Supplementary Tables pertaining to Figure 3**

**Supplementary Table S19. Loci enriched in individual cell types from microarray data**

**Loci enriched in Vasculature (WOL) from micorarray expression data analysis (1.7 fold, p <0.5)**

| Affymetrix Probeset | Locus     | Mean Microarray Expression Values |                          |                 |                             |                   |                    |
|---------------------|-----------|-----------------------------------|--------------------------|-----------------|-----------------------------|-------------------|--------------------|
|                     |           | Root Hairs (COBL9)                | Non-Hair Epidermis (WER) | Cortex (CORTEX) | Endodermis/ Quiescent (SCR) | Vasculature (WOL) | Columella (PET111) |
| 245947_at           | AT5G19530 | 0.531217875                       | 0.458686641              | 0.518623642     | 0.639615403                 | 4.131345551       | 0.825292776        |
| 249832_at           | AT5G23400 | 0.42136482                        | 0.526211669              | 0.545339799     | 0.702464956                 | 2.001683811       | 1.12626106         |
| 249780_at           | AT5G24240 | 0.694025549                       | 0.552495086              | 0.505296829     | 0.514361315                 | 1.391950484       | 0.543612874        |
| 246891_at           | AT5G25490 | 0.697481626                       | 0.556657051              | 0.59448348      | 0.733073151                 | 2.106360845       | 0.676987665        |
| 246860_at           | AT5G25840 | 0.440395701                       | 0.39734769               | 0.396754982     | 0.482391874                 | 1.607899789       | 0.61104363         |
| 246802_at           | AT5G27000 | 0.458317385                       | 0.453830767              | 0.501320362     | 0.957075488                 | 2.106119251       | 0.879010045        |
| 249115_at           | AT5G43810 | 0.485797097                       | 0.406308385              | 0.493968344     | 0.818519208                 | 3.481518071       | 1.119909915        |
| 249118_at           | AT5G43870 | 0.673342158                       | 0.563399055              | 0.569303125     | 0.649255519                 | 3.01735332        | 1.032285368        |
| 248807_at           | AT5G47500 | 0.67689132                        | 0.474518844              | 0.621890562     | 0.870715785                 | 1.946287277       | 0.819996806        |
| 248731_at           | AT5G48060 | 0.634344043                       | 0.606075019              | 0.634580238     | 0.774818977                 | 1.343955661       | 0.704246825        |
| 248656_at           | AT5G48460 | 0.556983635                       | 0.781964726              | 1.156996214     | 1.119406754                 | 2.206790719       | 0.821059208        |
| 248710_at           | AT5G48480 | 0.768893903                       | 0.758998579              | 1.008811405     | 3.941432389                 | 7.391342609       | 3.055191502        |
| 248435_at           | AT5G51210 | 0.637573252                       | 0.534763005              | 0.611136648     | 0.701912483                 | 1.769848856       | 0.767166218        |
| 247879_at           | AT5G57770 | 0.606197605                       | 0.536030815              | 0.508753967     | 0.645180382                 | 1.90132301        | 0.682092343        |
| 247589_at           | AT5G60690 | 0.741653041                       | 0.765347125              | 0.931040628     | 1.293069613                 | 5.260757031       | 2.814163459        |
| 247264_at           | AT5G64530 | 0.426149524                       | 0.403264149              | 0.412686833     | 0.426815618                 | 1.348406899       | 0.582214641        |
| 247084_at           | AT5G66300 | 0.581658268                       | 0.445101639              | 0.562800579     | 0.626298516                 | 1.758433748       | 1.002353386        |
| 247034_at           | AT5G67260 | 1.162026005                       | 2.688163044              | 2.626357112     | 3.138297369                 | 5.425939927       | 1.905872565        |
| 246999_at           | AT5G67440 | 0.613528169                       | 0.741807189              | 0.52585299      | 0.628077976                 | 2.067949861       | 1.085483115        |
| 246994_at           | AT5G67460 | 0.781933137                       | 0.783701391              | 0.737082908     | 0.813957573                 | 1.756527403       | 0.886391583        |



**Supplementary Tables pertaining to Figure 3**

**Supplementary Table S19. Loci enriched in individual cell types from microarray data**

**Loci enriched in Columella (PET111) from micorarray expression data analysis (1.7 fold, p <0.5)**

| Affymetrix Probeset | Locus     | Mean Microarray Expression Values |                          |                 |                             |                   |                    |
|---------------------|-----------|-----------------------------------|--------------------------|-----------------|-----------------------------|-------------------|--------------------|
|                     |           | Root Hairs (COBL9)                | Non-Hair Epidermis (WER) | Cortex (CORTEX) | Endodermis/ Quiescent (SCR) | Vasculature (WOL) | Columella (PET111) |
| 261586_at           | AT1G01640 | 0.739323691                       | 0.528576061              | 0.769074472     | 0.924158917                 | 0.897042069       | 2.676275585        |
| 262108_at           | AT1G02740 | 0.855108304                       | 0.800395549              | 0.869641226     | 0.925584187                 | 0.859726872       | 1.622383617        |
| 262105_at           | AT1G02810 | 5.597292921                       | 5.568987399              | 5.134262622     | 2.229906589                 | 2.022620495       | 12.74490538        |
| 264352_at           | AT1G03270 | 0.429642583                       | 0.687644617              | 0.494993037     | 0.593927952                 | 0.663588498       | 1.441722621        |
| 264360_at           | AT1G03310 | 0.718622533                       | 0.642293351              | 0.765993917     | 0.626224736                 | 0.712080109       | 1.974551887        |
| 264328_at           | AT1G04100 | 1.33206405                        | 0.80346834               | 0.987927208     | 1.099249054                 | 1.118300867       | 2.424451059        |
| 264323_at           | AT1G04180 | 1.704990115                       | 1.521709112              | 0.636727823     | 0.879166586                 | 0.930799672       | 10.43991888        |
| 264598_at           | AT1G04610 | 1.34046374                        | 3.241614952              | 1.203299016     | 3.032169861                 | 2.126918504       | 27.12652783        |
| 265194_at           | AT1G05010 | 2.858919854                       | 3.366300176              | 1.687741599     | 1.190808584                 | 1.2312319         | 21.61144998        |
| 264587_at           | AT1G05200 | 0.577020236                       | 0.526473486              | 0.668451944     | 0.636204906                 | 0.655988729       | 1.223592923        |
| 259394_at           | AT1G06420 | 0.607107751                       | 0.593870065              | 0.530145224     | 0.884163831                 | 0.692270492       | 2.241868937        |
| 262629_at           | AT1G06460 | 0.444271532                       | 0.406985951              | 0.492737542     | 0.45366367                  | 0.519416149       | 1.100152392        |
| 256066_at           | AT1G06980 | 0.843014326                       | 0.947472003              | 0.599218093     | 0.671422395                 | 0.792278515       | 2.725472285        |
| 256059_at           | AT1G06990 | 0.431792131                       | 0.463871215              | 0.447168955     | 0.509088293                 | 0.501943424       | 2.152030767        |
| 261075_at           | AT1G07280 | 0.640319377                       | 0.946868706              | 0.904497214     | 0.752184922                 | 0.562777197       | 4.775347327        |
| 261074_at           | AT1G07290 | 1.172995415                       | 1.72179658               | 1.014473772     | 0.81633859                  | 0.858346648       | 7.700280301        |
| 261809_at           | AT1G08340 | 3.343579753                       | 1.346764647              | 0.608205107     | 1.160435277                 | 2.675151826       | 7.499315497        |
| 261747_at           | AT1G08350 | 5.603252047                       | 2.981446319              | 2.880474604     | 1.528713942                 | 1.886476101       | 9.901873062        |
| 264549_at           | AT1G09440 | 0.40427588                        | 0.378114852              | 0.43853219      | 0.528715926                 | 0.783914279       | 1.661016611        |
| 264510_at           | AT1G09530 | 0.648705831                       | 0.687227646              | 0.758455792     | 1.117226425                 | 0.954611371       | 2.26907782         |
| 264508_at           | AT1G09570 | 2.135233836                       | 2.084786273              | 6.603546603     | 3.478747968                 | 3.676853376       | 14.71115038        |
| 257450_at           | AT1G10530 | 0.625138379                       | 2.89518917               | 0.542769615     | 0.56798421                  | 0.607239213       | 6.97752032         |
| 263258_at           | AT1G10540 | 0.567730323                       | 0.513263841              | 0.503070764     | 0.552353658                 | 0.608318133       | 1.152513156        |
| 262784_at           | AT1G10760 | 1.276047673                       | 1.879306645              | 2.72946462      | 1.816480449                 | 2.448854436       | 16.99646918        |
| 262759_at           | AT1G10800 | 0.809391943                       | 0.680433381              | 0.707883287     | 0.999193567                 | 1.340858555       | 2.632304625        |
| 262454_at           | AT1G11190 | 0.970448958                       | 0.775799827              | 0.520380592     | 0.832573363                 | 0.976227967       | 2.130086606        |
| 264389_at           | AT1G11960 | 1.37289248                        | 1.109165583              | 2.69991244      | 2.321448185                 | 1.008183766       | 4.766728089        |
| 264385_at           | AT1G12020 | 0.838844161                       | 0.845746171              | 0.657268871     | 0.724785726                 | 0.901790977       | 1.836605914        |
| 259520_at           | AT1G12320 | 0.443203368                       | 0.450326743              | 0.407191847     | 0.803216838                 | 0.709596616       | 1.492120083        |
| 259527_at           | AT1G12600 | 0.931927577                       | 0.937832927              | 0.645462273     | 0.653091344                 | 0.755608681       | 5.539670343        |
| 261211_at           | AT1G12780 | 0.714884286                       | 1.035268127              | 0.852869812     | 1.201169115                 | 2.743549879       | 8.769272566        |

**Supplementary Tables pertaining to Figure 3**

**Supplementary Table S19. Loci enriched in individual cell types from microarray data**

**Loci enriched in Columella (PET111) from micorarray expression data analysis (1.7 fold, p <0.5)**

| Affymetrix Probeset | Locus     | Mean Microarray Expression Values |                          |                 |                             |                   |                    |
|---------------------|-----------|-----------------------------------|--------------------------|-----------------|-----------------------------|-------------------|--------------------|
|                     |           | Root Hairs (COBL9)                | Non-Hair Epidermis (WER) | Cortex (CORTEX) | Endodermis/ Quiescent (SCR) | Vasculature (WOL) | Columella (PET111) |
| 262842_at           | AT1G14720 | 0.6510025                         | 0.863312042              | 0.637282456     | 1.931525273                 | 0.977948159       | 5.003187097        |
| 257463_at           | AT1G14820 | 1.260739414                       | 1.691001174              | 1.119183644     | 1.36327365                  | 1.157971013       | 5.376355233        |
| 262580_at           | AT1G15330 | 1.044526635                       | 1.058911275              | 0.895074035     | 1.063191799                 | 0.957179486       | 2.304081255        |
| 261763_at           | AT1G15520 | 2.118376179                       | 0.782365464              | 1.06054423      | 2.705185969                 | 0.928333199       | 5.176036727        |
| 261787_at           | AT1G16020 | 2.385635361                       | 1.505275561              | 1.612193906     | 2.053447751                 | 1.429203745       | 4.218466231        |
| 255893_at           | AT1G17960 | 0.681498528                       | 0.492959524              | 0.586206886     | 0.732832991                 | 0.60786059        | 1.984163932        |
| 260666_at           | AT1G19300 | 1.049041316                       | 0.706600965              | 1.231387399     | 0.730653282                 | 1.21269894        | 3.78845171         |
| 255782_at           | AT1G19850 | 0.704194818                       | 1.299223767              | 0.5130332       | 0.994491595                 | 2.005952967       | 5.376219699        |
| 260925_at           | AT1G21340 | 0.682323566                       | 0.988552481              | 0.557678078     | 0.589888105                 | 0.668565155       | 6.624278992        |
| 255955_at           | AT1G22030 | 0.633323459                       | 0.548616466              | 0.648426312     | 0.81097567                  | 1.446758794       | 3.323349423        |
| 255926_at           | AT1G22190 | 7.96104276                        | 6.462778868              | 5.856178675     | 6.524374847                 | 2.692868815       | 17.66779481        |
| 261934_at           | AT1G22400 | 1.960822631                       | 3.596327077              | 4.540834102     | 0.967380915                 | 1.194463348       | 11.19024208        |
| 264204_at           | AT1G22710 | 0.9411697                         | 0.714042312              | 0.924371721     | 1.651923046                 | 1.802322887       | 3.952692916        |
| 264775_at           | AT1G22880 | 3.87354623                        | 8.179488066              | 1.171054988     | 1.197577215                 | 0.8119692         | 32.12007795        |
| 264894_at           | AT1G23040 | 3.035024288                       | 2.681368709              | 5.418369639     | 3.915786335                 | 3.02318922        | 12.04163537        |
| 264900_at           | AT1G23080 | 0.48947759                        | 0.451755406              | 0.537855108     | 0.990083663                 | 1.793887731       | 3.388505135        |
| 264892_at           | AT1G23160 | 0.439542208                       | 3.092243234              | 0.533896456     | 0.619810065                 | 0.47584937        | 10.4064249         |
| 264896_at           | AT1G23210 | 0.840585018                       | 0.67055579               | 0.520121336     | 0.523137223                 | 0.556258818       | 9.752389871        |
| 263028_at           | AT1G24030 | 0.456027426                       | 0.440537231              | 0.476176759     | 0.880635429                 | 1.467971858       | 3.751310741        |
| 264868_at           | AT1G24090 | 1.026986468                       | 1.297623136              | 0.660953725     | 0.675622749                 | 0.862376349       | 3.162785539        |
| 245871_at           | AT1G26290 | 0.364527458                       | 0.344520286              | 0.346118545     | 0.37826778                  | 0.414321924       | 0.752218581        |
| 261260_at           | AT1G26680 | 0.569845926                       | 0.664939743              | 0.594652289     | 0.627847868                 | 0.818932427       | 10.3647881         |
| 263689_at           | AT1G26820 | 3.928742339                       | 3.161238758              | 0.675271209     | 1.318777885                 | 3.213733721       | 8.731624831        |
| 263683_at           | AT1G26870 | 0.520868629                       | 1.055995563              | 0.512720549     | 0.517974976                 | 0.551760045       | 4.537579217        |
| 264493_at           | AT1G27440 | 1.135191096                       | 0.814072191              | 0.737311483     | 0.805716827                 | 1.246308958       | 3.263378112        |
| 259606_at           | AT1G27920 | 0.370217518                       | 0.35096279               | 0.380146998     | 0.553840881                 | 0.95763181        | 1.808123498        |
| 259596_at           | AT1G28130 | 0.922299228                       | 4.252448464              | 6.137153328     | 0.97269172                  | 0.783271009       | 14.55181411        |
| 261441_at           | AT1G28470 | 0.656814222                       | 0.629682211              | 0.601298826     | 0.658569914                 | 0.980235587       | 3.312894873        |
| 260884_at           | AT1G29240 | 0.657660897                       | 0.616249721              | 0.927526616     | 0.593187016                 | 0.675254119       | 1.912223333        |
| 256190_at           | AT1G30100 | 0.37334631                        | 0.419679673              | 0.375256525     | 0.441384229                 | 0.491544717       | 1.035076743        |
| 256311_at           | AT1G30330 | 0.848748152                       | 1.818985153              | 1.259379395     | 1.099140596                 | 1.589421501       | 3.718961823        |

**Supplementary Tables pertaining to Figure 3**

**Supplementary Table S19. Loci enriched in individual cell types from microarray data**

**Loci enriched in Columella (PET111) from micorarray expression data analysis (1.7 fold, p <0.5)**

| Affymetrix Probeset | Locus     | Mean Microarray Expression Values |                          |                 |                             |                   |                    |
|---------------------|-----------|-----------------------------------|--------------------------|-----------------|-----------------------------|-------------------|--------------------|
|                     |           | Root Hairs (COBL9)                | Non-Hair Epidermis (WER) | Cortex (CORTEX) | Endodermis/ Quiescent (SCR) | Vasculature (WOL) | Columella (PET111) |
| 257467_at           | AT1G31320 | 0.434080554                       | 0.454064177              | 0.520991423     | 0.504997523                 | 0.642540864       | 1.104275376        |
| 261187_at           | AT1G32860 | 0.912792104                       | 1.375934628              | 0.795803908     | 0.777149765                 | 3.30514379        | 5.790700611        |
| 261191_at           | AT1G32900 | 0.498713533                       | 0.636174092              | 0.494302892     | 0.765150666                 | 0.574659852       | 6.074222165        |
| 256534_at           | AT1G33270 | 1.411458905                       | 1.276549576              | 1.280649477     | 1.267676103                 | 1.181117168       | 2.514705144        |
| 256535_at           | AT1G33280 | 0.775976918                       | 2.458011937              | 0.521570911     | 0.567794633                 | 0.569795485       | 5.559591573        |
| 262542_at           | AT1G34180 | 0.602158247                       | 0.579037043              | 0.592982813     | 0.576814066                 | 0.581839159       | 1.048573684        |
| 259550_at           | AT1G35230 | 0.527917706                       | 0.564565235              | 0.530285529     | 0.760797882                 | 0.694175078       | 5.866417663        |
| 256319_at           | AT1G35910 | 0.371220539                       | 0.357758534              | 0.396201611     | 0.739774104                 | 0.636302831       | 1.971297309        |
| 260867_at           | AT1G43790 | 0.792995056                       | 0.652995377              | 0.8216928       | 1.726930465                 | 3.592274396       | 9.347461993        |
| 245245_at           | AT1G44318 | 0.773231118                       | 2.869327182              | 0.665601649     | 0.675447982                 | 0.669494967       | 7.365711905        |
| 260502_at           | AT1G47270 | 0.784907573                       | 1.032389599              | 0.905902796     | 1.78792464                  | 1.60113908        | 9.62018837         |
| 260723_at           | AT1G48070 | 0.662834147                       | 1.150533133              | 0.478882786     | 0.541935386                 | 0.509265996       | 6.756925484        |
| 262244_at           | AT1G48260 | 1.091238011                       | 0.805725436              | 0.777502879     | 0.734501021                 | 0.95032327        | 2.524079059        |
| 260769_at           | AT1G49010 | 0.867794465                       | 0.77531328               | 0.690405451     | 0.735523337                 | 0.914035163       | 2.313653583        |
| 262416_at           | AT1G49390 | 0.630570796                       | 0.760387042              | 0.77078285      | 0.595293355                 | 0.535444196       | 1.349688668        |
| 257483_at           | AT1G49620 | 0.711183752                       | 0.906457144              | 0.752424896     | 0.966239416                 | 1.164874367       | 3.378547401        |
| 261691_at           | AT1G50060 | 6.309542851                       | 9.603673861              | 1.090876616     | 1.30047409                  | 0.633617664       | 31.28930313        |
| 257582_at           | AT1G50720 | 0.420026909                       | 1.360136138              | 0.421379377     | 0.414025544                 | 0.412192513       | 2.472140774        |
| 265145_at           | AT1G51190 | 0.721213923                       | 1.358090701              | 0.593909006     | 1.003007798                 | 0.702332383       | 3.33490468         |
| 262128_at           | AT1G52690 | 0.484523303                       | 2.473389375              | 0.599942495     | 1.29325274                  | 0.567627841       | 4.524430856        |
| 261369_at           | AT1G53060 | 0.952937853                       | 1.004047781              | 0.609304045     | 0.588756822                 | 0.7889069         | 2.512994019        |
| 261368_at           | AT1G53070 | 0.559766562                       | 1.220640523              | 0.568898646     | 0.808129669                 | 1.279723244       | 5.452741631        |
| 261315_at           | AT1G53170 | 1.046114679                       | 2.90277848               | 3.2299569       | 3.713408703                 | 2.206163712       | 7.261835107        |
| 260589_at           | AT1G53400 | 2.037908349                       | 1.632316552              | 2.477189283     | 3.158763356                 | 1.674575155       | 7.764686079        |
| 260973_at           | AT1G53490 | 0.615638814                       | 0.730505258              | 0.642607572     | 0.631910097                 | 0.771257994       | 1.539535978        |
| 259961_at           | AT1G53700 | 3.080487497                       | 2.755006973              | 0.649719312     | 0.953894019                 | 0.940586987       | 8.660900457        |
| 262257_at           | AT1G53860 | 0.569073256                       | 0.623878976              | 0.546218684     | 0.699364897                 | 0.690943526       | 3.665945953        |
| 264184_at           | AT1G54790 | 0.52269447                        | 0.394312029              | 0.459241197     | 0.646297316                 | 1.122164761       | 3.185194228        |
| 245674_at           | AT1G56680 | 0.677599499                       | 5.077248952              | 0.733706712     | 0.858263832                 | 0.681230477       | 11.94499595        |
| 256025_at           | AT1G58370 | 0.726809702                       | 0.563110432              | 0.66087189      | 1.231223839                 | 3.013871217       | 5.140227735        |
| 262905_at           | AT1G59730 | 0.469748271                       | 0.381054423              | 0.428579489     | 0.582757451                 | 0.51311313        | 1.152038679        |

**Supplementary Tables pertaining to Figure 3**

**Supplementary Table S19. Loci enriched in individual cell types from microarray data**

**Loci enriched in Columella (PET111) from micorarray expression data analysis (1.7 fold, p <0.5)**

| Affymetrix Probeset | Locus     | Mean Microarray Expression Values |                          |                 |                             |                   |                    |
|---------------------|-----------|-----------------------------------|--------------------------|-----------------|-----------------------------|-------------------|--------------------|
|                     |           | Root Hairs (COBL9)                | Non-Hair Epidermis (WER) | Cortex (CORTEX) | Endodermis/ Quiescent (SCR) | Vasculature (WOL) | Columella (PET111) |
| 263732_at           | AT1G59980 | 0.807409247                       | 0.736481684              | 0.678673976     | 0.553988901                 | 0.635313938       | 1.798391908        |
| 260632_at           | AT1G62360 | 0.687843757                       | 0.539582349              | 0.60696623      | 0.586641967                 | 0.657078664       | 1.306911406        |
| 260637_at           | AT1G62380 | 0.831032234                       | 0.598311873              | 1.522021801     | 7.340247048                 | 6.484404869       | 18.77727985        |
| 261100_at           | AT1G63020 | 0.575052449                       | 0.568865105              | 0.575879568     | 0.643266731                 | 0.635691448       | 2.575779326        |
| 259688_at           | AT1G63120 | 1.512164989                       | 1.141305915              | 1.476234703     | 2.143773108                 | 5.361715462       | 12.76612223        |
| 262003_at           | AT1G64460 | 3.251031169                       | 2.044606408              | 1.580255504     | 3.205739181                 | 2.550478176       | 7.087119694        |
| 264682_at           | AT1G65570 | 2.46770682                        | 1.376292216              | 0.638327621     | 0.859948056                 | 0.647636782       | 20.23881795        |
| 264626_at           | AT1G65620 | 0.827203854                       | 0.894198068              | 0.674414054     | 0.736909201                 | 0.793902504       | 6.353680904        |
| 260141_at           | AT1G66350 | 0.611550152                       | 0.76325515               | 0.727762878     | 0.598867236                 | 0.633521134       | 1.851019187        |
| 255851_at           | AT1G67040 | 0.482937872                       | 0.527821928              | 0.450446204     | 0.613947081                 | 0.641867723       | 1.265582327        |
| 255881_at           | AT1G67070 | 2.125416792                       | 1.031615441              | 0.961305527     | 0.875608906                 | 0.860257402       | 7.452526304        |
| 264942_at           | AT1G67340 | 1.00387915                        | 0.920728071              | 1.224077811     | 1.534402999                 | 2.147825386       | 5.199574315        |
| 264227_at           | AT1G67500 | 1.611659011                       | 1.122541724              | 1.326491279     | 1.31805995                  | 1.465175291       | 2.909451416        |
| 245200_at           | AT1G67850 | 1.442825273                       | 1.834116749              | 0.647329363     | 0.764456889                 | 0.747596582       | 5.214628172        |
| 260412_at           | AT1G69830 | 1.095360705                       | 1.082380349              | 1.018447804     | 1.502215975                 | 0.981259354       | 10.20923026        |
| 260414_at           | AT1G69850 | 1.015898706                       | 1.286704329              | 0.906512749     | 1.157757686                 | 1.007208837       | 2.534808194        |
| 260407_at           | AT1G69910 | 0.896899855                       | 1.111563409              | 1.488645252     | 1.139688496                 | 1.544471421       | 3.376182564        |
| 264714_at           | AT1G69990 | 0.5183672                         | 0.490029892              | 0.467173435     | 0.507137558                 | 0.573312636       | 1.242340622        |
| 264314_at           | AT1G70420 | 1.639895271                       | 1.646120333              | 1.194427038     | 1.996327881                 | 0.93620468        | 4.894744153        |
| 260333_at           | AT1G70500 | 0.406063195                       | 0.417021495              | 0.487417078     | 0.817118631                 | 1.439534385       | 3.807817679        |
| 262263_at           | AT1G70940 | 0.707884827                       | 0.546792208              | 0.723203581     | 1.363499065                 | 2.345246381       | 4.870658555        |
| 259897_at           | AT1G71380 | 0.680698624                       | 1.13541495               | 0.450696388     | 0.516204367                 | 0.54888694        | 3.989072692        |
| 261514_at           | AT1G71870 | 0.607689266                       | 0.541859123              | 0.593237189     | 0.93902317                  | 0.853188569       | 2.503560451        |
| 256338_at           | AT1G72100 | 0.501179399                       | 0.50937284               | 0.454571553     | 0.531411529                 | 0.55007716        | 1.361456332        |
| 259848_at           | AT1G72180 | 0.852712134                       | 0.778430574              | 0.874545253     | 1.438123458                 | 1.517466949       | 9.377000442        |
| 245734_at           | AT1G73480 | 1.634548908                       | 1.456875317              | 1.328841018     | 1.508766363                 | 1.2194778         | 5.670931399        |
| 245779_at           | AT1G73510 | 0.736355615                       | 0.728891192              | 0.649812515     | 0.822025238                 | 0.507522751       | 2.051915178        |
| 245778_at           | AT1G73530 | 1.796911361                       | 1.486419505              | 1.257592179     | 1.668879567                 | 1.039560976       | 3.533757027        |
| 260076_at           | AT1G73630 | 0.48519937                        | 0.394566616              | 0.399064688     | 0.565526058                 | 0.572937358       | 1.070697462        |
| 260373_at           | AT1G73970 | 0.985717482                       | 0.987393071              | 1.08789305      | 0.962534022                 | 1.080258048       | 2.854444975        |
| 260386_at           | AT1G74010 | 2.403583835                       | 0.872550548              | 0.666435076     | 0.729982204                 | 0.690225814       | 4.992409352        |

**Supplementary Tables pertaining to Figure 3**

**Supplementary Table S19. Loci enriched in individual cell types from microarray data**

**Loci enriched in Columella (PET111) from micorarray expression data analysis (1.7 fold, p <0.5)**

| Affymetrix Probeset | Locus     | Mean Microarray Expression Values |                          |                 |                             |                   |                    |
|---------------------|-----------|-----------------------------------|--------------------------|-----------------|-----------------------------|-------------------|--------------------|
|                     |           | Root Hairs (COBL9)                | Non-Hair Epidermis (WER) | Cortex (CORTEX) | Endodermis/ Quiescent (SCR) | Vasculature (WOL) | Columella (PET111) |
| 260211_at           | AT1G74440 | 1.382325985                       | 0.673864363              | 0.89519324      | 0.767708866                 | 0.77441778        | 2.999617579        |
| 256454_at           | AT1G75280 | 0.760169245                       | 0.743443747              | 2.305836124     | 2.632047211                 | 5.543806158       | 12.21303988        |
| 262969_at           | AT1G75710 | 4.367804362                       | 5.465089101              | 2.109425179     | 1.461429156                 | 4.10574762        | 10.01277907        |
| 262967_at           | AT1G75730 | 0.562179605                       | 0.742161253              | 0.763049573     | 0.603017695                 | 0.941325302       | 1.806623794        |
| 262728_at           | AT1G75820 | 0.785610028                       | 0.655463611              | 0.718580235     | 1.033465822                 | 1.098543002       | 2.60624945         |
| 259979_at           | AT1G76600 | 12.59021713                       | 11.82732525              | 10.15388721     | 14.23723804                 | 4.944246471       | 25.92982772        |
| 264961_at           | AT1G76950 | 1.53995176                        | 1.388259134              | 1.285708097     | 1.181494523                 | 1.120425699       | 2.839919073        |
| 264957_at           | AT1G77000 | 1.650701372                       | 1.098013614              | 1.015200926     | 1.257277739                 | 1.014990111       | 5.093709942        |
| 264485_at           | AT1G77220 | 1.022882275                       | 1.070719361              | 0.961924595     | 1.031640314                 | 1.155861919       | 2.633451688        |
| 259707_at           | AT1G77490 | 0.839581038                       | 0.78873378               | 0.906979096     | 0.835789037                 | 0.767859752       | 3.070962163        |
| 260053_at           | AT1G78120 | 1.35709589                        | 0.742680167              | 1.566376817     | 1.770661388                 | 2.837571311       | 5.725534014        |
| 261393_at           | AT1G79580 | 0.416111085                       | 1.963080604              | 0.481349881     | 0.447945802                 | 0.476247515       | 3.597770029        |
| 262061_at           | AT1G80110 | 1.460274185                       | 1.521260584              | 0.871789653     | 0.919794149                 | 1.078326281       | 6.099961581        |
| 260276_at           | AT1G80450 | 0.557909125                       | 0.459044798              | 0.553819537     | 0.614324993                 | 0.496155421       | 1.728023188        |
| 260288_at           | AT1G80530 | 0.802310156                       | 1.989711166              | 1.11713773      | 1.939454534                 | 2.160721383       | 6.169369176        |
| 261881_at           | AT1G80760 | 0.636581357                       | 0.562619666              | 0.68399294      | 0.77690376                  | 0.783295767       | 1.506244136        |
| 262205_at           | AT2G01080 | 1.395575241                       | 0.947155467              | 0.956255664     | 0.942502923                 | 1.133198531       | 2.497804653        |
| 266300_at           | AT2G01420 | 0.727472478                       | 1.569378096              | 4.205793636     | 2.628160785                 | 3.86304651        | 19.52480546        |
| 266708_at           | AT2G03200 | 0.713046134                       | 0.646712801              | 0.691052215     | 1.009600057                 | 1.24607442        | 2.145026503        |
| 263481_at           | AT2G04025 | 0.327207465                       | 1.480564222              | 0.472514934     | 1.980121713                 | 0.48628285        | 22.90738086        |
| 266381_at           | AT2G14670 | 0.687991321                       | 0.528366915              | 0.573811515     | 0.594192898                 | 0.687172689       | 1.461048247        |
| 263096_at           | AT2G16060 | 1.217667396                       | 1.829240414              | 0.780784876     | 0.906712445                 | 1.299067203       | 4.403115294        |
| 265354_at           | AT2G16700 | 0.490991259                       | 0.523778949              | 0.889257162     | 2.300187802                 | 0.883921007       | 7.208267192        |
| 265358_at           | AT2G16710 | 3.740964086                       | 2.317072941              | 3.731103822     | 4.289683504                 | 3.867598772       | 8.484170151        |
| 265357_at           | AT2G16740 | 0.964963161                       | 0.799278874              | 0.765929067     | 1.266670059                 | 1.2499238         | 3.315638649        |
| 265339_at           | AT2G18230 | 0.905484121                       | 2.214958552              | 0.94334052      | 1.268431038                 | 2.067148368       | 10.13001601        |
| 265948_at           | AT2G19590 | 1.553468794                       | 1.175075429              | 1.840360413     | 1.183354252                 | 1.168349677       | 8.971790177        |
| 266695_at           | AT2G19810 | 1.439510255                       | 1.518554193              | 1.1736932       | 1.734496384                 | 1.667777587       | 5.133965338        |
| 265577_at           | AT2G20100 | 0.346118608                       | 0.325488873              | 0.343776157     | 0.60650342                  | 0.547497598       | 1.065591512        |
| 264019_at           | AT2G21130 | 5.921420648                       | 4.627509082              | 3.718790739     | 3.910783843                 | 2.670257455       | 10.33951842        |
| 263544_at           | AT2G21590 | 0.361028405                       | 0.374044187              | 0.350489549     | 0.408029724                 | 0.414706508       | 1.675974802        |

**Supplementary Tables pertaining to Figure 3**

**Supplementary Table S19. Loci enriched in individual cell types from microarray data**

**Loci enriched in Columella (PET111) from micorarray expression data analysis (1.7 fold, p <0.5)**

| Affymetrix Probeset | Locus     | Mean Microarray Expression Values |                          |                 |                             |                   |                    |
|---------------------|-----------|-----------------------------------|--------------------------|-----------------|-----------------------------|-------------------|--------------------|
|                     |           | Root Hairs (COBL9)                | Non-Hair Epidermis (WER) | Cortex (CORTEX) | Endodermis/ Quiescent (SCR) | Vasculature (WOL) | Columella (PET111) |
| 263543_at           | AT2G21610 | 1.544574247                       | 1.629091053              | 0.774621019     | 0.831786748                 | 0.697989355       | 12.46143581        |
| 267182_at           | AT2G23360 | 0.578236303                       | 1.050998839              | 1.00208614      | 0.645272433                 | 0.934995044       | 4.535979671        |
| 267290_at           | AT2G23750 | 0.77028885                        | 1.088524025              | 0.755595521     | 0.813396702                 | 1.117130257       | 2.831709247        |
| 266568_at           | AT2G24070 | 0.652529791                       | 0.807170317              | 0.862374524     | 0.641260756                 | 1.073075234       | 1.845904668        |
| 265609_at           | AT2G25420 | 0.549802562                       | 0.780015488              | 0.826593085     | 0.744603079                 | 0.866601549       | 1.615091344        |
| 266893_at           | AT2G26070 | 1.322919519                       | 1.656772944              | 1.570458258     | 1.909865788                 | 2.169026026       | 4.768133565        |
| 267376_at           | AT2G26330 | 0.602056767                       | 0.676335622              | 0.621998114     | 0.683841203                 | 0.764230693       | 2.070010838        |
| 267614_at           | AT2G26710 | 1.623627242                       | 1.98013746               | 0.591232        | 0.669670508                 | 0.678525874       | 3.423316334        |
| 266209_at           | AT2G27550 | 0.786181541                       | 0.840230794              | 0.877812354     | 1.63123801                  | 1.40176429        | 7.442701474        |
| 266244_at           | AT2G27740 | 0.468773066                       | 0.445109551              | 0.459664555     | 0.995173344                 | 3.468662664       | 6.541794226        |
| 266163_at           | AT2G28130 | 0.645830159                       | 0.83087634               | 0.919982004     | 0.949217805                 | 0.903153194       | 1.636405531        |
| 265272_at           | AT2G28350 | 1.478449276                       | 1.697744459              | 1.294508174     | 1.175897186                 | 1.20353626        | 8.06192315         |
| 265276_at           | AT2G28400 | 4.16916606                        | 3.7023391                | 2.42956654      | 2.886517657                 | 1.11686096        | 7.660103021        |
| 266221_at           | AT2G28760 | 3.071895916                       | 4.293910444              | 0.949992378     | 1.297223548                 | 2.313995376       | 10.33180752        |
| 266227_at           | AT2G28870 | 0.444450392                       | 0.433124993              | 0.395856442     | 0.464044202                 | 0.657209601       | 4.673275213        |
| 266225_at           | AT2G28900 | 0.692390402                       | 1.401759043              | 0.697178382     | 1.842415061                 | 0.986624111       | 11.48191735        |
| 266783_at           | AT2G29130 | 0.600153947                       | 0.494528029              | 0.56330165      | 0.543492502                 | 0.709845994       | 1.336124756        |
| 266274_at           | AT2G29380 | 0.685668619                       | 0.755330324              | 0.590311843     | 0.657945954                 | 0.680847296       | 1.715787351        |
| 266805_at           | AT2G30010 | 0.579869245                       | 0.607839078              | 0.613558852     | 1.051956475                 | 0.947569046       | 2.041591999        |
| 267300_at           | AT2G30140 | 1.964115999                       | 1.436415581              | 1.639504162     | 1.350985817                 | 1.381469752       | 4.666337403        |
| 263465_at           | AT2G31940 | 0.600020912                       | 0.743257949              | 0.628447856     | 0.853811616                 | 0.829758799       | 3.478489244        |
| 266362_at           | AT2G32430 | 0.899773328                       | 1.348123349              | 1.134841533     | 3.71815128                  | 1.104249781       | 7.822223206        |
| 267116_at           | AT2G32560 | 0.850990315                       | 1.060356224              | 0.841894365     | 1.056284523                 | 0.905877962       | 2.09258113         |
| 245163_at           | AT2G33230 | 0.654986121                       | 0.474167376              | 0.514742354     | 0.581310179                 | 0.670968975       | 3.341866541        |
| 256714_at           | AT2G34080 | 0.986100686                       | 1.199497697              | 0.836798578     | 0.586538335                 | 0.690002939       | 2.13411028         |
| 256720_at           | AT2G34140 | 0.809866406                       | 1.328450559              | 0.736456184     | 1.441037357                 | 1.661635196       | 4.509543744        |
| 267414_at           | AT2G34790 | 0.483967816                       | 0.399359582              | 0.369612966     | 0.681950554                 | 1.298875088       | 3.025411611        |
| 263912_at           | AT2G36390 | 2.384596451                       | 1.797727306              | 3.103097261     | 2.406045566                 | 1.675965898       | 5.705296454        |
| 263866_at           | AT2G36950 | 2.784163819                       | 4.876728898              | 4.480687877     | 15.27938471                 | 2.564884295       | 29.45097843        |
| 265463_at           | AT2G37090 | 0.702175585                       | 0.484312972              | 0.847016646     | 1.196015842                 | 2.922808287       | 7.406216851        |
| 267094_at           | AT2G38080 | 0.549394268                       | 0.459020227              | 0.488286332     | 1.183568846                 | 2.550858875       | 7.963626656        |

**Supplementary Tables pertaining to Figure 3**

**Supplementary Table S19. Loci enriched in individual cell types from microarray data**

**Loci enriched in Columella (PET111) from micorarray expression data analysis (1.7 fold, p <0.5)**

| Affymetrix Probeset | Locus     | Mean Microarray Expression Values |                          |                 |                             |                   |                    |
|---------------------|-----------|-----------------------------------|--------------------------|-----------------|-----------------------------|-------------------|--------------------|
|                     |           | Root Hairs (COBL9)                | Non-Hair Epidermis (WER) | Cortex (CORTEX) | Endodermis/ Quiescent (SCR) | Vasculature (WOL) | Columella (PET111) |
| 263265_at           | AT2G38820 | 0.987604857                       | 0.835764644              | 1.567754102     | 2.173164242                 | 1.426867784       | 4.079337228        |
| 267591_at           | AT2G39705 | 3.280986798                       | 2.063187719              | 3.881489127     | 2.127015604                 | 2.935693901       | 7.011349614        |
| 267356_at           | AT2G39930 | 0.597869338                       | 0.915858883              | 1.34536419      | 1.074566116                 | 1.385936273       | 2.419127868        |
| 267337_at           | AT2G39980 | 1.269911463                       | 1.138263056              | 1.005459683     | 0.847849479                 | 1.213741348       | 3.272375261        |
| 255823_at           | AT2G40470 | 0.639473085                       | 2.226065268              | 0.57645069      | 0.574563722                 | 0.695658061       | 7.155491381        |
| 245094_at           | AT2G40840 | 1.863133068                       | 2.878919988              | 4.896346464     | 1.924439939                 | 2.163536117       | 10.08732161        |
| 267075_at           | AT2G41070 | 0.52863109                        | 0.780275264              | 0.516257497     | 0.57245066                  | 1.083045055       | 2.246839853        |
| 267082_at           | AT2G41140 | 1.177490447                       | 0.906822861              | 1.066375627     | 1.444100204                 | 1.321705336       | 2.498741297        |
| 266391_at           | AT2G41290 | 4.41567955                        | 3.654217103              | 2.032261867     | 0.916714708                 | 1.192675805       | 11.67013715        |
| 245105_at           | AT2G41610 | 0.754647265                       | 0.593020855              | 0.62672851      | 0.857502102                 | 1.409391225       | 3.309037464        |
| 245140_at           | AT2G45420 | 0.466247379                       | 0.400156174              | 0.46257447      | 0.775293307                 | 1.121352335       | 2.060306272        |
| 266925_at           | AT2G45740 | 1.086127975                       | 0.822001584              | 1.048094126     | 0.789069392                 | 0.787684043       | 2.721555455        |
| 266917_at           | AT2G45830 | 0.69924413                        | 0.965377654              | 1.420777847     | 1.531626292                 | 1.146582606       | 3.205391498        |
| 266710_at           | AT2G46850 | 0.468078921                       | 1.061861749              | 0.536812624     | 0.611176479                 | 0.667279326       | 5.866974357        |
| 266756_at           | AT2G46950 | 1.011478446                       | 1.453947554              | 0.893357388     | 0.840017681                 | 1.032333727       | 2.908357152        |
| 266753_at           | AT2G46990 | 0.485719741                       | 0.522650873              | 0.464246502     | 0.558269971                 | 0.749648126       | 3.371192284        |
| 260528_at           | AT2G47260 | 1.14913215                        | 1.204876146              | 0.88001844      | 1.232612605                 | 0.736838261       | 3.32642718         |
| 259268_at           | AT3G01070 | 0.538753217                       | 1.716513047              | 0.611459263     | 0.658316906                 | 0.797618376       | 3.632291623        |
| 259181_at           | AT3G01690 | 0.746831803                       | 1.401952982              | 1.806945073     | 1.386984914                 | 1.386939089       | 7.221372944        |
| 259182_at           | AT3G01750 | 0.599009086                       | 0.559532086              | 0.574976074     | 0.666282971                 | 1.170565675       | 2.973577361        |
| 259000_at           | AT3G01860 | 0.996495795                       | 0.793837764              | 0.835287097     | 1.151227752                 | 1.107848596       | 6.240508407        |
| 258857_at           | AT3G02110 | 1.024949367                       | 1.082209108              | 0.630604354     | 1.204546363                 | 0.798861929       | 2.405850662        |
| 259122_at           | AT3G02210 | 2.294805656                       | 1.212397685              | 2.011125781     | 2.682864313                 | 3.163071264       | 6.523921491        |
| 258603_at           | AT3G02990 | 0.934151154                       | 0.75925257               | 0.999958001     | 0.904267731                 | 0.78745992        | 1.921639666        |
| 259043_at           | AT3G03440 | 0.651460644                       | 0.545952529              | 0.73600364      | 0.720120675                 | 0.826447221       | 1.647880205        |
| 259042_at           | AT3G03450 | 0.549769215                       | 1.373327617              | 0.674050599     | 0.593584619                 | 1.132382644       | 2.65275757         |
| 259058_at           | AT3G03470 | 0.676105416                       | 0.63848057               | 0.634693694     | 0.739818848                 | 1.277864355       | 2.515826199        |
| 259339_at           | AT3G03900 | 1.460801036                       | 1.201692948              | 1.118047403     | 1.157616259                 | 1.924953684       | 4.544444528        |
| 258591_at           | AT3G04360 | 0.53024092                        | 0.630985738              | 0.538752213     | 0.528550135                 | 0.548522771       | 1.241820759        |
| 259081_at           | AT3G05030 | 0.888379903                       | 0.851936617              | 1.236865253     | 1.081103203                 | 1.244825205       | 3.445620149        |
| 258901_at           | AT3G05640 | 0.4782973                         | 0.479699                 | 0.537260024     | 0.632107638                 | 0.642375108       | 1.126240656        |

**Supplementary Tables pertaining to Figure 3**

**Supplementary Table S19. Loci enriched in individual cell types from microarray data**

**Loci enriched in Columella (PET111) from micorarray expression data analysis (1.7 fold, p <0.5)**

| Affymetrix Probeset | Locus     | Mean Microarray Expression Values |                          |                 |                             |                   |                    |
|---------------------|-----------|-----------------------------------|--------------------------|-----------------|-----------------------------|-------------------|--------------------|
|                     |           | Root Hairs (COBL9)                | Non-Hair Epidermis (WER) | Cortex (CORTEX) | Endodermis/ Quiescent (SCR) | Vasculature (WOL) | Columella (PET111) |
| 259061_at           | AT3G07410 | 5.459209637                       | 3.074651603              | 0.961202609     | 1.71293878                  | 1.479790391       | 13.11639019        |
| 257522_at           | AT3G08990 | 0.683417126                       | 0.880469472              | 0.795697561     | 1.073444209                 | 0.952683168       | 2.087879839        |
| 259142_at           | AT3G10200 | 0.496848828                       | 0.486751121              | 0.49447496      | 0.578648971                 | 0.670238869       | 1.8391617          |
| 259150_at           | AT3G10320 | 0.551001178                       | 0.434154688              | 0.464637957     | 0.453300679                 | 0.459134325       | 2.53004501         |
| 258959_at           | AT3G10600 | 0.857433316                       | 0.617479362              | 0.610140039     | 0.676841244                 | 0.675261357       | 3.03716877         |
| 258760_at           | AT3G10780 | 0.379749498                       | 0.601098286              | 0.425819153     | 0.544940632                 | 0.461134987       | 4.016914973        |
| 256441_at           | AT3G10940 | 0.694925797                       | 1.833408435              | 1.760496051     | 1.441422438                 | 1.39236993        | 5.518156847        |
| 259235_at           | AT3G11600 | 0.782854023                       | 0.806309333              | 0.592312507     | 0.737983035                 | 0.573473012       | 2.473228859        |
| 259102_at           | AT3G11660 | 0.846429256                       | 0.744359197              | 1.07708155      | 3.303106807                 | 1.054638677       | 6.101256544        |
| 256660_at           | AT3G12060 | 0.410703846                       | 0.448718338              | 0.428105039     | 0.5014079                   | 0.656790575       | 2.833448069        |
| 256235_at           | AT3G12490 | 6.287081144                       | 5.167505095              | 4.023685452     | 4.726158097                 | 3.232869156       | 15.07387072        |
| 257054_at           | AT3G15353 | 0.403352669                       | 0.427119847              | 0.504823281     | 0.853536028                 | 0.947282403       | 3.433616611        |
| 258270_at           | AT3G15650 | 0.573312042                       | 0.475105966              | 0.580923438     | 0.794987845                 | 1.010254026       | 2.289033583        |
| 258434_at           | AT3G16770 | 1.222052251                       | 1.128073697              | 4.664150124     | 1.835295704                 | 1.848647522       | 10.03969971        |
| 257896_at           | AT3G16920 | 0.456744639                       | 0.469034362              | 0.505303031     | 1.021016436                 | 2.762956565       | 9.007360043        |
| 257060_at           | AT3G18230 | 2.127842352                       | 2.954827554              | 1.226858735     | 1.578909365                 | 1.092111883       | 15.96315552        |
| 257718_at           | AT3G18400 | 0.469898269                       | 0.426163663              | 0.456528228     | 0.529526709                 | 0.522592339       | 0.957836064        |
| 257722_at           | AT3G18490 | 1.421152988                       | 2.898608346              | 2.355675647     | 2.938719089                 | 3.57125364        | 9.292028812        |
| 257750_at           | AT3G18800 | 0.570946312                       | 0.90658967               | 0.662063941     | 0.73724358                  | 0.763959041       | 1.697357882        |
| 256652_at           | AT3G18850 | 0.866623656                       | 0.911588374              | 0.717192338     | 0.70858393                  | 0.824860607       | 1.754525367        |
| 258021_at           | AT3G19380 | 0.600437882                       | 0.965585152              | 0.802685843     | 1.299269766                 | 1.066497521       | 3.539915473        |
| 258008_at           | AT3G19430 | 7.794198285                       | 9.708857284              | 1.04270325      | 1.517235831                 | 0.947008273       | 40.64884721        |
| 257962_at           | AT3G19790 | 1.198962587                       | 2.302570558              | 1.411326478     | 1.458660082                 | 1.762230866       | 4.137350182        |
| 257976_at           | AT3G20840 | 0.663121389                       | 0.899554163              | 0.65008051      | 0.706000312                 | 0.884605814       | 2.156009391        |
| 257544_at           | AT3G20880 | 0.962326272                       | 0.671356591              | 0.72448532      | 1.021175339                 | 0.708949452       | 2.613448967        |
| 258183_at           | AT3G21550 | 0.699869689                       | 0.552403843              | 0.65987565      | 1.240448711                 | 2.301993886       | 6.403479329        |
| 257262_at           | AT3G21890 | 1.295025023                       | 1.496124062              | 1.027651429     | 0.870693525                 | 0.910909264       | 3.113035548        |
| 257264_at           | AT3G22060 | 0.603351593                       | 1.091636756              | 0.453650531     | 0.449235066                 | 0.489641698       | 2.051857892        |
| 257260_at           | AT3G22104 | 0.877398066                       | 0.878288136              | 1.002444272     | 0.954362907                 | 0.902126507       | 1.974659073        |
| 256833_at           | AT3G22910 | 2.15243304                        | 0.707313286              | 0.674670779     | 1.838059125                 | 0.708067181       | 5.043807391        |
| 257769_at           | AT3G23050 | 6.30173704                        | 7.878960654              | 5.672993041     | 3.085502879                 | 1.719929082       | 20.22766268        |



**Supplementary Tables pertaining to Figure 3**

**Supplementary Table S19. Loci enriched in individual cell types from microarray data**

**Loci enriched in Columella (PET111) from micorarray expression data analysis (1.7 fold, p <0.5)**

| Affymetrix Probeset | Locus     | Mean Microarray Expression Values |                          |                 |                             |                   |                    |
|---------------------|-----------|-----------------------------------|--------------------------|-----------------|-----------------------------|-------------------|--------------------|
|                     |           | Root Hairs (COBL9)                | Non-Hair Epidermis (WER) | Cortex (CORTEX) | Endodermis/ Quiescent (SCR) | Vasculature (WOL) | Columella (PET111) |
| 257926_at           | AT3G23280 | 7.162227239                       | 2.747858847              | 6.685023578     | 7.741135736                 | 3.790138984       | 17.88000269        |
| 258299_at           | AT3G23410 | 1.494240783                       | 4.572437153              | 1.389050077     | 1.065358726                 | 0.862667447       | 9.466957171        |
| 258139_at           | AT3G24520 | 1.317509943                       | 1.285231527              | 3.025257657     | 4.841518073                 | 2.711870924       | 11.32469124        |
| 256762_at           | AT3G25655 | 1.965975421                       | 1.171300155              | 1.74990497      | 0.834442401                 | 0.705963728       | 4.22634706         |
| 257637_at           | AT3G25810 | 0.513716938                       | 0.472559249              | 0.514513425     | 0.579284875                 | 0.541688516       | 1.16900258         |
| 258072_at           | AT3G26090 | 1.804705395                       | 1.409744306              | 1.630407292     | 0.95148049                  | 0.943449601       | 3.303061521        |
| 257633_at           | AT3G26125 | 0.578995898                       | 0.434737305              | 0.504175667     | 0.586299459                 | 0.756388722       | 1.425002996        |
| 258029_at           | AT3G27580 | 1.236233792                       | 1.913421112              | 1.722552037     | 0.964015557                 | 0.934987228       | 3.604150134        |
| 257226_at           | AT3G27880 | 3.527127689                       | 3.719629468              | 1.420224025     | 1.54003709                  | 0.986170397       | 6.696973028        |
| 256596_at           | AT3G28540 | 0.47671498                        | 0.446525821              | 0.458267926     | 0.476494299                 | 0.514283217       | 2.70585986         |
| 245228_at           | AT3G29810 | 0.689209064                       | 0.725465356              | 0.612370723     | 0.749490438                 | 0.689220206       | 2.446686635        |
| 252786_at           | AT3G42670 | 0.537503707                       | 0.49702969               | 0.509398508     | 0.760191222                 | 0.756946521       | 2.62824279         |
| 252746_at           | AT3G43190 | 0.574931154                       | 0.460914929              | 0.603112603     | 0.885729951                 | 1.514842272       | 2.636463078        |
| 252736_at           | AT3G43210 | 0.592284838                       | 0.79518145               | 0.650360391     | 0.851743652                 | 0.999723105       | 1.922367695        |
| 252673_at           | AT3G44240 | 0.528368513                       | 0.413140963              | 0.442911549     | 0.507623174                 | 0.519860849       | 0.978229718        |
| 252606_at           | AT3G45010 | 4.294368152                       | 2.890508441              | 1.857316873     | 10.14554207                 | 5.953386304       | 23.30698903        |
| 252615_at           | AT3G45230 | 2.114286432                       | 3.831132243              | 3.449498443     | 1.719373553                 | 3.084167325       | 7.802098675        |
| 252550_at           | AT3G45870 | 0.592367224                       | 0.491375565              | 0.585452701     | 0.659516632                 | 0.862719303       | 1.698533711        |
| 252505_at           | AT3G46170 | 0.439690329                       | 0.540317128              | 0.586242605     | 0.46758457                  | 0.556112789       | 1.016690238        |
| 252527_at           | AT3G46440 | 8.86063735                        | 7.009311109              | 5.332749993     | 3.121326148                 | 3.94418131        | 17.64368885        |
| 252504_at           | AT3G46590 | 1.055071153                       | 1.18972896               | 1.021954893     | 0.984762376                 | 1.118311621       | 2.279839318        |
| 252468_at           | AT3G46970 | 1.616089946                       | 1.870662547              | 1.880926271     | 1.341811014                 | 1.368275425       | 12.78257965        |
| 252359_at           | AT3G48440 | 0.854726627                       | 0.693767952              | 0.710579067     | 0.886315309                 | 1.03676905        | 2.304202334        |
| 252286_at           | AT3G49070 | 0.86279663                        | 0.610140647              | 0.695913673     | 0.667862164                 | 0.862569985       | 1.646136182        |
| 252189_at           | AT3G50070 | 0.881074106                       | 2.310995233              | 2.704177633     | 1.517618832                 | 1.946937317       | 6.637759637        |
| 252211_at           | AT3G50220 | 0.478963935                       | 0.433407349              | 0.45801231      | 0.67182061                  | 0.875954939       | 2.415581466        |
| 252215_at           | AT3G50240 | 0.462782125                       | 0.699222695              | 0.517042029     | 0.603545097                 | 0.803236958       | 3.623575386        |
| 252212_at           | AT3G50310 | 0.592078014                       | 0.50902096               | 0.552577895     | 0.569489517                 | 0.618097695       | 2.660997326        |
| 252204_at           | AT3G50340 | 0.863174072                       | 1.608887524              | 1.38026761      | 1.845413492                 | 2.673709748       | 7.537475215        |
| 252158_at           | AT3G50530 | 4.636622354                       | 3.480931885              | 3.099796342     | 1.306710304                 | 2.103983509       | 10.91077503        |
| 256676_at           | AT3G52180 | 0.58302275                        | 0.68056289               | 0.61532351      | 0.755531341                 | 0.602919664       | 3.310993288        |

**Supplementary Tables pertaining to Figure 3**

**Supplementary Table S19. Loci enriched in individual cell types from microarray data**

**Loci enriched in Columella (PET111) from micorarray expression data analysis (1.7 fold, p <0.5)**

| Affymetrix Probeset | Locus     | Mean Microarray Expression Values |                          |                 |                             |                   |                    |
|---------------------|-----------|-----------------------------------|--------------------------|-----------------|-----------------------------|-------------------|--------------------|
|                     |           | Root Hairs (COBL9)                | Non-Hair Epidermis (WER) | Cortex (CORTEX) | Endodermis/ Quiescent (SCR) | Vasculature (WOL) | Columella (PET111) |
| 251994_at           | AT3G52890 | 1.198396603                       | 1.330347922              | 1.726565332     | 1.457132312                 | 1.364659519       | 3.213442993        |
| 252019_at           | AT3G53040 | 0.496477707                       | 0.444254258              | 0.396010003     | 0.498816625                 | 0.537669248       | 3.70425603         |
| 251937_at           | AT3G53400 | 1.199519329                       | 1.570442795              | 2.246744511     | 1.617115182                 | 0.99754226        | 8.854162502        |
| 251961_at           | AT3G53620 | 1.739620191                       | 1.772530242              | 1.148996214     | 1.332000788                 | 2.986161934       | 7.733918945        |
| 251906_at           | AT3G53720 | 0.580460593                       | 0.590228019              | 0.510369729     | 0.573921964                 | 0.522095963       | 1.534999757        |
| 251912_at           | AT3G53840 | 0.689484229                       | 0.636667842              | 0.625969371     | 0.554885917                 | 0.603841122       | 1.901677518        |
| 251900_at           | AT3G54430 | 0.459159369                       | 0.449500373              | 0.479439247     | 0.562723937                 | 0.592224516       | 1.113563634        |
| 251835_at           | AT3G55180 | 0.522597467                       | 0.797273003              | 0.541777647     | 0.574383931                 | 0.57656253        | 7.364575193        |
| 251792_at           | AT3G55550 | 0.469116378                       | 0.479644544              | 0.498705673     | 0.683964371                 | 0.58078896        | 6.93125324         |
| 251753_at           | AT3G55760 | 0.537714241                       | 1.100573952              | 0.675903176     | 0.916929226                 | 0.90924921        | 4.771614022        |
| 251768_at           | AT3G55940 | 1.081983695                       | 0.57952976               | 0.545276404     | 0.642834983                 | 0.903608423       | 2.044173645        |
| 251770_at           | AT3G55970 | 1.497171611                       | 0.683712168              | 0.671614331     | 0.746874144                 | 0.56051756        | 8.814273688        |
| 251739_at           | AT3G56170 | 5.845221332                       | 2.745583313              | 2.181478123     | 1.524059174                 | 2.033775031       | 13.68958577        |
| 246293_at           | AT3G56710 | 2.122960477                       | 0.869829328              | 0.397189922     | 0.629976129                 | 0.574026599       | 7.103895516        |
| 251660_at           | AT3G57160 | 0.742021478                       | 1.153045281              | 0.737137557     | 0.97349087                  | 0.951129561       | 4.279634904        |
| 251592_at           | AT3G57670 | 0.500962641                       | 0.429277034              | 0.528991353     | 0.559566257                 | 0.713251829       | 1.709974976        |
| 251533_at           | AT3G58460 | 2.969260969                       | 2.589710089              | 2.356308294     | 1.621779211                 | 1.86489356        | 5.096091433        |
| 251521_at           | AT3G59420 | 0.463033574                       | 0.654733243              | 0.52591498      | 0.609181405                 | 0.609109225       | 1.157200954        |
| 251436_at           | AT3G59900 | 1.789331327                       | 1.159509625              | 0.927811815     | 0.630568304                 | 1.047232443       | 3.255744311        |
| 251393_at           | AT3G60640 | 1.408879336                       | 1.084432777              | 0.769521902     | 1.521380923                 | 0.856535269       | 2.775005421        |
| 251377_at           | AT3G60650 | 0.289488775                       | 0.304211592              | 0.283433584     | 0.428527261                 | 0.342933541       | 2.455450025        |
| 251342_at           | AT3G60690 | 1.093965204                       | 0.607842117              | 1.023411163     | 1.203737533                 | 0.876977594       | 4.448814708        |
| 251321_at           | AT3G61460 | 1.390443603                       | 1.282974414              | 1.23583116      | 1.509831175                 | 1.652495466       | 3.870344337        |
| 251326_at           | AT3G61590 | 0.785378866                       | 1.015403596              | 1.20767158      | 1.80902141                  | 1.562739725       | 3.205998461        |
| 251282_at           | AT3G61630 | 0.69690026                        | 0.750141302              | 0.905630816     | 0.782091326                 | 0.711395259       | 1.763857007        |
| 251293_at           | AT3G61930 | 2.491962284                       | 2.622812639              | 0.565084989     | 0.960619507                 | 0.863289103       | 23.07389533        |
| 251297_at           | AT3G62020 | 0.620322794                       | 0.729620549              | 0.538397375     | 1.066458651                 | 3.053444305       | 8.932660515        |
| 251249_at           | AT3G62160 | 0.775481667                       | 0.700257916              | 0.581726149     | 1.323440479                 | 2.270361094       | 5.186434559        |
| 251266_at           | AT3G62320 | 0.91219653                        | 0.673335188              | 0.884715671     | 0.836667197                 | 0.98551567        | 4.080372232        |
| 251160_at           | AT3G63240 | 0.841595988                       | 1.030951395              | 0.964430085     | 0.924974647                 | 0.989811909       | 2.763227842        |
| 255701_at           | AT4G00220 | 1.196382715                       | 0.789148039              | 0.810090182     | 0.932956571                 | 1.18782616        | 2.893682521        |

**Supplementary Tables pertaining to Figure 3**

**Supplementary Table S19. Loci enriched in individual cell types from microarray data**

**Loci enriched in Columella (PET111) from micorarray expression data analysis (1.7 fold, p <0.5)**

| Affymetrix Probeset | Locus     | Mean Microarray Expression Values |                          |                 |                             |                   |                    |
|---------------------|-----------|-----------------------------------|--------------------------|-----------------|-----------------------------|-------------------|--------------------|
|                     |           | Root Hairs (COBL9)                | Non-Hair Epidermis (WER) | Cortex (CORTEX) | Endodermis/ Quiescent (SCR) | Vasculature (WOL) | Columella (PET111) |
| 255702_at           | AT4G00230 | 0.775874093                       | 0.637245047              | 0.668372056     | 0.774829025                 | 0.862779948       | 1.586694555        |
| 255676_at           | AT4G00490 | 1.914745784                       | 2.069399645              | 1.400827258     | 1.059871385                 | 0.938010321       | 12.37770473        |
| 255637_at           | AT4G00750 | 0.582515324                       | 0.694335317              | 0.47951693      | 0.582449225                 | 0.540809493       | 6.041932073        |
| 255639_at           | AT4G00760 | 0.773477376                       | 0.742445572              | 0.629305297     | 0.824894095                 | 0.825513143       | 1.405348282        |
| 255645_at           | AT4G00880 | 0.54515625                        | 0.477516084              | 0.476591832     | 0.538724237                 | 0.588637279       | 1.426968366        |
| 255612_at           | AT4G01240 | 0.979768668                       | 2.999597225              | 0.525421479     | 0.475953246                 | 0.629311098       | 6.981851652        |
| 255568_at           | AT4G01250 | 2.293608701                       | 1.851019767              | 1.601168362     | 1.435976593                 | 0.765670255       | 4.586720175        |
| 255448_at           | AT4G02810 | 0.570364081                       | 0.618283956              | 0.714924597     | 0.844490181                 | 0.84661686        | 2.212700953        |
| 255332_at           | AT4G04340 | 1.724820173                       | 2.548191526              | 2.823531737     | 1.380945611                 | 2.138520083       | 6.158765452        |
| 255150_at           | AT4G08160 | 0.580363327                       | 0.483516077              | 0.694120854     | 1.526096974                 | 2.743233593       | 5.880637413        |
| 255064_at           | AT4G08950 | 0.869421184                       | 3.426794588              | 5.774096815     | 4.725495861                 | 1.949048598       | 10.15770331        |
| 255070_at           | AT4G09020 | 1.077269431                       | 1.559445957              | 1.839736423     | 1.646634055                 | 1.00688771        | 12.2859814         |
| 255014_at           | AT4G09960 | 0.517289634                       | 0.399611792              | 0.411655022     | 0.45711512                  | 0.472565419       | 2.72841582         |
| 254975_at           | AT4G10500 | 1.111419415                       | 0.610349427              | 0.578653936     | 0.730770131                 | 0.679372488       | 5.655045118        |
| 254933_at           | AT4G11130 | 0.468994673                       | 0.527520281              | 0.482483738     | 0.646616094                 | 0.683405324       | 1.67626919         |
| 254917_at           | AT4G11350 | 1.434415061                       | 1.464419963              | 0.670237724     | 0.929732107                 | 0.954279041       | 4.357884693        |
| 254897_at           | AT4G11470 | 0.433410052                       | 0.38598225               | 0.382253516     | 0.46598379                  | 0.448218386       | 0.897619943        |
| 254781_at           | AT4G12840 | 0.590722943                       | 1.57577779               | 0.963564721     | 0.754318496                 | 1.027160378       | 3.805385419        |
| 254791_at           | AT4G12910 | 1.109324779                       | 1.561038384              | 0.768759856     | 0.903230982                 | 1.454446738       | 11.42871006        |
| 254754_at           | AT4G13210 | 0.947394739                       | 0.839324559              | 0.563161369     | 0.583325553                 | 0.625080954       | 4.404683313        |
| 254764_at           | AT4G13250 | 0.942724118                       | 0.845495729              | 0.999165901     | 1.012321726                 | 1.063823574       | 5.670565782        |
| 254728_at           | AT4G13690 | 0.436582174                       | 0.609127983              | 0.477100143     | 0.599104369                 | 0.715980174       | 1.481036366        |
| 245619_at           | AT4G13990 | 0.664560057                       | 1.423455198              | 0.607397063     | 0.607758193                 | 0.7572962         | 3.55394287         |
| 245385_at           | AT4G14020 | 0.605909968                       | 0.488080472              | 0.536506728     | 0.770906693                 | 0.65971259        | 1.346655363        |
| 245545_at           | AT4G15280 | 0.579792518                       | 0.700721346              | 0.55987508      | 0.607139896                 | 0.579844435       | 3.269872086        |
| 245528_at           | AT4G15530 | 1.28820571                        | 0.802014068              | 0.735714006     | 0.558899314                 | 0.609031604       | 7.721086434        |
| 245517_at           | AT4G15840 | 2.143239433                       | 1.171468394              | 2.09126459      | 1.857027652                 | 1.631724954       | 3.836068051        |
| 245276_at           | AT4G16780 | 1.465578003                       | 1.230108416              | 0.946813725     | 1.156055812                 | 2.045806268       | 4.043112271        |
| 245405_at           | AT4G17150 | 0.845078611                       | 1.212454607              | 2.289678821     | 1.644077235                 | 0.970781656       | 4.434500773        |
| 254702_at           | AT4G17940 | 5.469494548                       | 4.785564404              | 3.666099508     | 2.74937935                  | 2.165322564       | 13.23751168        |
| 254668_at           | AT4G18350 | 0.518362294                       | 0.454642558              | 0.474924015     | 0.56302025                  | 0.555959799       | 3.256530125        |

**Supplementary Tables pertaining to Figure 3**

**Supplementary Table S19. Loci enriched in individual cell types from microarray data**

**Loci enriched in Columella (PET111) from micorarray expression data analysis (1.7 fold, p <0.5)**

| Affymetrix Probeset | Locus     | Mean Microarray Expression Values |                          |                 |                             |                   |                    |
|---------------------|-----------|-----------------------------------|--------------------------|-----------------|-----------------------------|-------------------|--------------------|
|                     |           | Root Hairs (COBL9)                | Non-Hair Epidermis (WER) | Cortex (CORTEX) | Endodermis/ Quiescent (SCR) | Vasculature (WOL) | Columella (PET111) |
| 254629_at           | AT4G18425 | 1.184739614                       | 0.794800168              | 0.555657787     | 1.31331781                  | 2.422493683       | 5.135165273        |
| 254674_at           | AT4G18450 | 0.758485618                       | 0.60703842               | 0.467680017     | 0.567545523                 | 0.618946767       | 3.74772972         |
| 254605_at           | AT4G18950 | 5.758792699                       | 4.33779384               | 4.53447945      | 4.086298274                 | 1.674250875       | 10.84896754        |
| 254575_at           | AT4G19460 | 0.784913493                       | 1.409862697              | 0.438068982     | 0.63367758                  | 0.517573267       | 8.438997229        |
| 254551_at           | AT4G19840 | 0.667540317                       | 0.582289674              | 0.686143864     | 1.213708718                 | 0.997795475       | 4.383489486        |
| 254349_at           | AT4G22250 | 0.640995046                       | 1.825675406              | 0.746675442     | 0.545884062                 | 0.854849771       | 3.414572882        |
| 254304_at           | AT4G22270 | 0.717006115                       | 0.617918813              | 1.138092072     | 1.120343915                 | 0.854619474       | 2.856459724        |
| 254299_at           | AT4G22920 | 0.707087569                       | 0.635076601              | 0.838221333     | 0.976206192                 | 1.283890678       | 2.341911872        |
| 254293_at           | AT4G23060 | 1.059854832                       | 0.790206457              | 2.798013433     | 1.870144271                 | 0.831363929       | 7.040374209        |
| 254188_at           | AT4G23920 | 0.764948919                       | 0.992165921              | 0.85050841      | 0.810010032                 | 0.761858326       | 5.65960925         |
| 254115_at           | AT4G24710 | 0.557063584                       | 0.866906835              | 0.723606839     | 0.7823132                   | 0.910653103       | 2.911801787        |
| 254068_at           | AT4G25450 | 0.86901689                        | 1.077505354              | 1.307370721     | 1.513541724                 | 1.763198555       | 3.537169365        |
| 253956_at           | AT4G26700 | 0.516855723                       | 1.186757937              | 1.586305028     | 0.730543009                 | 0.568309696       | 7.282314161        |
| 253936_at           | AT4G26880 | 1.160351865                       | 2.852178106              | 0.570860401     | 0.670873294                 | 0.546156233       | 15.13774755        |
| 253908_at           | AT4G27260 | 1.825740535                       | 0.859706711              | 1.023634587     | 1.741403579                 | 1.548541546       | 3.608839775        |
| 253914_at           | AT4G27400 | 3.940805244                       | 5.66465752               | 1.107604774     | 1.397434396                 | 0.974307366       | 24.31015063        |
| 253875_at           | AT4G27520 | 0.896983361                       | 0.786655055              | 0.695082345     | 0.906299677                 | 0.827214689       | 10.38667226        |
| 253801_at           | AT4G28170 | 0.559093488                       | 0.590519233              | 0.568691323     | 0.647765473                 | 0.598271008       | 1.162074136        |
| 253806_at           | AT4G28270 | 1.204177325                       | 0.604549367              | 1.258593465     | 1.918585919                 | 1.367866369       | 3.909267145        |
| 253814_at           | AT4G28290 | 2.6592563                         | 1.096716157              | 1.883987916     | 3.944527349                 | 2.032229622       | 10.55557382        |
| 253791_at           | AT4G28640 | 0.751011081                       | 0.594189563              | 0.599869429     | 0.660305581                 | 0.96317004        | 2.107150499        |
| 253794_at           | AT4G28720 | 0.797578155                       | 1.698835676              | 0.552736504     | 1.036833203                 | 1.474441192       | 13.49733603        |
| 253696_at           | AT4G29740 | 0.732908065                       | 0.522986545              | 0.622839388     | 0.612997145                 | 0.68068838        | 1.526985121        |
| 253650_at           | AT4G30020 | 0.793790254                       | 2.239405748              | 1.915601023     | 1.57299533                  | 2.259031741       | 4.684132876        |
| 253501_at           | AT4G32010 | 1.039314567                       | 0.978991241              | 0.865843912     | 0.851207743                 | 1.595904531       | 2.808831484        |
| 253475_at           | AT4G32290 | 0.6981919                         | 1.281433769              | 0.812219996     | 1.247447771                 | 1.176761614       | 2.624613252        |
| 253382_at           | AT4G33040 | 0.785341382                       | 0.843499059              | 0.769188083     | 1.119300986                 | 0.76504856        | 2.7138548          |
| 253299_at           | AT4G33800 | 0.542787485                       | 1.194414803              | 0.619801001     | 0.764523642                 | 0.886873215       | 3.62120818         |
| 253215_at           | AT4G34950 | 0.764209017                       | 0.61317408               | 0.711439483     | 0.778096843                 | 2.353990897       | 5.862766834        |
| 253217_at           | AT4G34970 | 0.438609892                       | 0.567325745              | 0.673278118     | 1.027390094                 | 0.606466938       | 31.26792361        |
| 253155_at           | AT4G35720 | 0.544205271                       | 0.66248831               | 0.496311974     | 0.584895657                 | 0.543764212       | 5.212393745        |

**Supplementary Tables pertaining to Figure 3**

**Supplementary Table S19. Loci enriched in individual cell types from microarray data**

**Loci enriched in Columella (PET111) from micorarray expression data analysis (1.7 fold, p <0.5)**

| Affymetrix Probeset | Locus     | Mean Microarray Expression Values |                          |                 |                             |                   |                    |
|---------------------|-----------|-----------------------------------|--------------------------|-----------------|-----------------------------|-------------------|--------------------|
|                     |           | Root Hairs (COBL9)                | Non-Hair Epidermis (WER) | Cortex (CORTEX) | Endodermis/ Quiescent (SCR) | Vasculature (WOL) | Columella (PET111) |
| 253126_at           | AT4G36050 | 0.675695558                       | 0.6570104                | 0.737060483     | 0.8313574                   | 0.892562612       | 1.788965452        |
| 246195_at           | AT4G36410 | 0.554214221                       | 0.487150407              | 0.555934776     | 0.750254202                 | 0.787053975       | 1.380138374        |
| 246235_at           | AT4G36830 | 1.333007834                       | 0.780417814              | 1.499448139     | 1.036838292                 | 0.825946909       | 3.889680099        |
| 246212_at           | AT4G36930 | 0.559123208                       | 1.040378121              | 0.660169772     | 0.852105508                 | 1.210073511       | 2.866827404        |
| 253043_at           | AT4G37540 | 1.720362591                       | 1.40816851               | 1.509435404     | 1.452110545                 | 1.767184079       | 3.872536883        |
| 253066_at           | AT4G37770 | 1.077637437                       | 1.33369924               | 0.794242372     | 0.964342826                 | 0.919902496       | 3.577688233        |
| 253041_at           | AT4G37870 | 7.537916128                       | 9.97938133               | 4.447365503     | 8.763187472                 | 2.247581486       | 22.3507648         |
| 253011_at           | AT4G37890 | 0.585751582                       | 0.655241857              | 0.631972013     | 1.33736574                  | 1.063731082       | 6.185022939        |
| 253014_at           | AT4G37940 | 0.947091397                       | 1.577845314              | 1.237725848     | 1.199093985                 | 1.540377886       | 6.462853956        |
| 253008_at           | AT4G38210 | 0.620157904                       | 0.708683516              | 0.902660061     | 0.98440474                  | 0.755124689       | 1.797619959        |
| 252988_at           | AT4G38410 | 0.699330679                       | 1.446998836              | 0.64742928      | 3.297380112                 | 0.959505604       | 14.01341893        |
| 252956_at           | AT4G38580 | 0.660016776                       | 0.654422323              | 0.648822431     | 1.151286819                 | 1.875238908       | 3.502544232        |
| 252944_at           | AT4G39320 | 0.471874739                       | 0.435983324              | 0.722200708     | 0.603254148                 | 0.800901767       | 1.466650824        |
| 252860_at           | AT4G39790 | 0.585100471                       | 0.615273355              | 0.560303565     | 0.754317757                 | 0.78462028        | 1.439033382        |
| 251123_at           | AT5G01030 | 0.957319275                       | 0.946220693              | 1.051869323     | 1.067823813                 | 1.123370081       | 6.824614582        |
| 251131_at           | AT5G01190 | 0.855651199                       | 0.667039464              | 0.587205123     | 0.599914878                 | 1.412686766       | 2.444735372        |
| 251081_at           | AT5G02070 | 0.425524058                       | 0.516762277              | 0.391179132     | 0.455594915                 | 0.446244677       | 6.908253358        |
| 250991_at           | AT5G02380 | 5.686911269                       | 11.10016314              | 4.147878445     | 10.92918398                 | 13.21379315       | 40.13904887        |
| 250958_at           | AT5G03260 | 0.709866731                       | 0.629133206              | 0.923757156     | 1.466552665                 | 3.153410459       | 7.747603065        |
| 250906_at           | AT5G03650 | 0.681058619                       | 1.125368942              | 1.271657887     | 1.148177732                 | 1.22582448        | 3.666116405        |
| 250881_at           | AT5G04080 | 0.360441122                       | 0.350348368              | 0.354795591     | 0.48689885                  | 0.498576845       | 0.897243882        |
| 245697_at           | AT5G04200 | 1.135291414                       | 1.840259495              | 0.543594787     | 0.787330505                 | 1.264724587       | 3.22058506         |
| 250848_at           | AT5G04510 | 1.650606012                       | 1.482018357              | 2.095451108     | 1.334465863                 | 1.836310145       | 3.953630208        |
| 250803_at           | AT5G04980 | 0.589938708                       | 0.618054895              | 0.659120979     | 0.627502279                 | 0.656812956       | 2.021853202        |
| 250811_at           | AT5G05110 | 1.022433048                       | 0.794081256              | 1.022439105     | 1.096344857                 | 0.946941995       | 3.093028677        |
| 250738_at           | AT5G05730 | 3.337589361                       | 2.466662848              | 3.047625947     | 4.199868601                 | 2.621611485       | 10.85788307        |
| 250753_at           | AT5G05860 | 0.769737928                       | 0.630252875              | 1.641188798     | 1.363813266                 | 1.406018116       | 3.050593879        |
| 250724_at           | AT5G06330 | 0.846510873                       | 0.755666112              | 1.074023265     | 1.620902052                 | 0.922245969       | 4.232520866        |
| 250737_at           | AT5G06370 | 2.226879082                       | 1.329012622              | 2.248939749     | 2.542420333                 | 2.618246278       | 4.488117005        |
| 250728_at           | AT5G06440 | 0.634382184                       | 0.4978804                | 0.713176063     | 0.750299822                 | 0.500082656       | 2.142713661        |
| 250610_at           | AT5G07550 | 0.456446995                       | 0.497642759              | 0.443666109     | 0.470484536                 | 0.53505752        | 1.674502172        |

**Supplementary Tables pertaining to Figure 3**

**Supplementary Table S19. Loci enriched in individual cell types from microarray data**

**Loci enriched in Columella (PET111) from micorarray expression data analysis (1.7 fold, p <0.5)**

| Affymetrix Probeset | Locus     | Mean Microarray Expression Values |                          |                 |                             |                   |                    |
|---------------------|-----------|-----------------------------------|--------------------------|-----------------|-----------------------------|-------------------|--------------------|
|                     |           | Root Hairs (COBL9)                | Non-Hair Epidermis (WER) | Cortex (CORTEX) | Endodermis/ Quiescent (SCR) | Vasculature (WOL) | Columella (PET111) |
| 245891_at           | AT5G09220 | 0.806051504                       | 0.651750176              | 1.130147331     | 3.579533394                 | 1.684735385       | 10.60277697        |
| 250511_at           | AT5G09960 | 1.909746873                       | 2.090943333              | 2.616941276     | 1.923860912                 | 1.443210931       | 13.97548729        |
| 250435_at           | AT5G10380 | 0.494075743                       | 0.462147752              | 0.511103359     | 0.62000391                  | 0.578910008       | 1.306982064        |
| 250426_at           | AT5G10510 | 0.668176262                       | 1.862268333              | 0.738333905     | 1.11206236                  | 1.086969056       | 3.860872823        |
| 250322_at           | AT5G12870 | 0.738645377                       | 0.510825421              | 0.658075669     | 0.754672015                 | 1.498003406       | 2.851190175        |
| 250205_at           | AT5G14020 | 2.557176354                       | 4.104953746              | 4.527073255     | 1.0349707                   | 0.964414086       | 8.449370311        |
| 250194_at           | AT5G14550 | 1.34871483                        | 1.519550642              | 1.841086359     | 1.111983117                 | 1.604031897       | 3.851620469        |
| 250149_at           | AT5G14700 | 1.533845791                       | 1.194253396              | 1.607370065     | 2.366153464                 | 0.823944576       | 5.23823574         |
| 246600_at           | AT5G14930 | 0.781630889                       | 0.690001849              | 0.791410719     | 0.531192598                 | 0.512629937       | 1.902821385        |
| 250155_at           | AT5G15160 | 0.539725031                       | 1.148603288              | 0.401279464     | 0.451711136                 | 0.492528703       | 4.549563732        |
| 246554_at           | AT5G15450 | 0.859494316                       | 1.225902724              | 1.286626429     | 1.798980103                 | 1.382292504       | 4.178516501        |
| 246511_at           | AT5G15490 | 11.26141053                       | 10.01382887              | 7.129351902     | 3.732729143                 | 11.74420033       | 20.21091684        |
| 246512_at           | AT5G15630 | 0.96913106                        | 0.715504177              | 0.742665659     | 0.925994676                 | 2.067467693       | 4.257975042        |
| 246493_at           | AT5G16180 | 0.508006797                       | 0.500070388              | 0.625887305     | 0.617110326                 | 0.631211024       | 1.248232949        |
| 246502_at           | AT5G16240 | 0.810559418                       | 0.927881435              | 0.742501365     | 0.700861517                 | 0.875851047       | 1.660640452        |
| 250120_at           | AT5G16490 | 0.683562012                       | 0.63883128               | 0.693723218     | 0.969508085                 | 2.007670068       | 3.862189094        |
| 246434_at           | AT5G17520 | 1.14858156                        | 2.481361567              | 1.757371851     | 1.137593967                 | 1.233820211       | 10.84250762        |
| 249986_at           | AT5G18460 | 0.905095015                       | 2.545598976              | 0.708202824     | 0.674954671                 | 1.429034398       | 6.474347149        |
| 249983_at           | AT5G18470 | 2.195443782                       | 0.694286069              | 2.298939357     | 1.048376672                 | 0.758143541       | 7.927864673        |
| 246138_at           | AT5G19870 | 0.445141795                       | 0.401943505              | 0.434766622     | 0.613541087                 | 0.894129989       | 2.019339144        |
| 246097_at           | AT5G20270 | 0.697775871                       | 0.78487996               | 0.643050086     | 1.640795164                 | 0.695895842       | 3.073895348        |
| 246117_at           | AT5G20320 | 1.001669937                       | 0.868123893              | 0.898799753     | 1.012530374                 | 0.983544325       | 1.73355434         |
| 245998_at           | AT5G20830 | 0.574777093                       | 0.755190259              | 0.543545537     | 0.964653931                 | 0.736019147       | 2.289918084        |
| 249897_at           | AT5G22550 | 0.894948204                       | 0.688443661              | 0.665960611     | 0.585331881                 | 0.429490515       | 2.227676349        |
| 249879_at           | AT5G23170 | 0.655233105                       | 0.566424801              | 0.621682127     | 0.869495752                 | 1.133977027       | 2.843420346        |
| 249752_at           | AT5G24660 | 0.570769115                       | 0.789685322              | 1.031549613     | 0.964799305                 | 0.765154652       | 4.568933606        |
| 246922_at           | AT5G25110 | 0.695556683                       | 0.602064316              | 1.412392302     | 0.807445616                 | 1.100902095       | 4.543991319        |
| 246829_at           | AT5G26570 | 0.79953071                        | 0.95868115               | 0.852413263     | 1.10588302                  | 1.034037888       | 6.229702577        |
| 246820_at           | AT5G26910 | 0.87915415                        | 0.825842129              | 1.226506115     | 1.030944559                 | 1.137358722       | 2.877694935        |
| 246822_at           | AT5G26960 | 0.935690665                       | 0.886664971              | 0.761527381     | 0.990046011                 | 1.137192764       | 2.186858625        |
| 246814_at           | AT5G27200 | 0.660973845                       | 0.654116901              | 0.736170604     | 0.660713765                 | 0.65821436        | 1.524119241        |

**Supplementary Tables pertaining to Figure 3**

**Supplementary Table S19. Loci enriched in individual cell types from microarray data**

**Loci enriched in Columella (PET111) from micorarray expression data analysis (1.7 fold, p <0.5)**

| Affymetrix Probeset | Locus     | Mean Microarray Expression Values |                          |                 |                             |                   |                    |
|---------------------|-----------|-----------------------------------|--------------------------|-----------------|-----------------------------|-------------------|--------------------|
|                     |           | Root Hairs (COBL9)                | Non-Hair Epidermis (WER) | Cortex (CORTEX) | Endodermis/ Quiescent (SCR) | Vasculature (WOL) | Columella (PET111) |
| 246682_at           | AT5G33290 | 1.116779422                       | 0.960511096              | 0.819910116     | 0.605586938                 | 0.726155817       | 2.360702268        |
| 249719_at           | AT5G35735 | 6.857109139                       | 7.521765978              | 6.322074785     | 11.02987034                 | 2.966954676       | 23.63065699        |
| 249631_at           | AT5G37160 | 0.489308017                       | 0.412584971              | 0.451141211     | 0.453800583                 | 0.527752022       | 1.998935241        |
| 249574_at           | AT5G37660 | 0.675059521                       | 0.582537288              | 0.60270507      | 0.810761426                 | 1.083956604       | 3.221560596        |
| 249532_at           | AT5G38780 | 0.414585949                       | 0.525784377              | 0.387226261     | 0.422973867                 | 0.490061633       | 1.350745081        |
| 249420_at           | AT5G39820 | 0.52732977                        | 0.760410642              | 0.467592786     | 0.475974444                 | 0.499355338       | 6.433625418        |
| 249432_at           | AT5G39930 | 0.43749783                        | 0.463313808              | 0.411921672     | 0.471942348                 | 0.477148354       | 0.926599038        |
| 249439_at           | AT5G40020 | 0.538366003                       | 0.483933386              | 0.56823499      | 1.649937755                 | 2.757445933       | 8.16526008         |
| 249202_at           | AT5G42580 | 1.332205567                       | 0.950723308              | 4.617341408     | 1.338114841                 | 1.337921256       | 8.897609397        |
| 249174_at           | AT5G42900 | 0.614852083                       | 0.419328472              | 0.464752029     | 0.81617361                  | 0.701040755       | 1.450017994        |
| 249126_at           | AT5G43380 | 0.699582889                       | 0.517451706              | 0.748738044     | 1.394584032                 | 1.103454827       | 2.423601419        |
| 248964_at           | AT5G45340 | 3.716722699                       | 3.158281808              | 4.309841865     | 5.315920739                 | 1.557321065       | 12.84361996        |
| 248961_at           | AT5G45650 | 0.991228181                       | 0.682456611              | 1.128175159     | 0.812500647                 | 0.859792466       | 2.317309433        |
| 248909_at           | AT5G45810 | 1.607369652                       | 1.087312079              | 0.659510776     | 1.073978521                 | 0.896802631       | 5.058460145        |
| 248926_at           | AT5G45880 | 0.715364743                       | 1.014789881              | 0.657441559     | 0.677444572                 | 0.661035933       | 2.609302678        |
| 248928_at           | AT5G45970 | 0.531592688                       | 0.43243053               | 0.488918533     | 0.584377657                 | 0.933735239       | 1.595326793        |
| 248887_at           | AT5G46115 | 0.380589204                       | 0.421358935              | 0.388242545     | 0.44895673                  | 0.617778031       | 1.180374445        |
| 248819_at           | AT5G47050 | 2.886134524                       | 2.132430401              | 4.418930996     | 4.380353075                 | 1.854452651       | 7.959267711        |
| 248789_at           | AT5G47440 | 0.819083045                       | 0.545557916              | 0.563514421     | 0.793801364                 | 0.885363017       | 1.860920699        |
| 248740_at           | AT5G48130 | 0.663353486                       | 0.727133188              | 0.583341817     | 0.640896847                 | 0.676022638       | 6.627058352        |
| 248687_at           | AT5G48300 | 0.916413298                       | 2.059851324              | 2.848184557     | 1.453096003                 | 1.181467552       | 7.929884872        |
| 248642_at           | AT5G49120 | 0.399587563                       | 0.613886596              | 0.39821361      | 0.445067359                 | 0.546093036       | 1.058165734        |
| 248590_at           | AT5G49660 | 0.650509556                       | 0.51482862               | 0.601068064     | 0.898435274                 | 0.910018374       | 1.774110957        |
| 248558_at           | AT5G49990 | 0.602949138                       | 0.705941284              | 0.919294148     | 0.868597093                 | 0.908532032       | 1.721949703        |
| 248476_at           | AT5G50890 | 0.665946829                       | 0.616019595              | 0.616136101     | 0.699230107                 | 0.797178163       | 1.586927629        |
| 248431_at           | AT5G51470 | 0.64112711                        | 1.161951654              | 0.544975214     | 0.510783677                 | 0.537598071       | 12.3520676         |
| 248419_at           | AT5G51550 | 0.60123313                        | 0.852453186              | 0.774867244     | 1.652650134                 | 1.595085808       | 10.46652041        |
| 248380_at           | AT5G51820 | 0.609665588                       | 1.240640798              | 1.254356105     | 1.185377184                 | 1.389474153       | 3.307224682        |
| 248382_at           | AT5G51890 | 0.645501438                       | 0.568550404              | 0.86865237      | 3.393877245                 | 9.054448674       | 21.23891141        |
| 248286_at           | AT5G52870 | 0.543759866                       | 0.428121937              | 0.417796932     | 0.5626026                   | 0.533440949       | 1.005167944        |
| 248273_at           | AT5G53500 | 1.159342846                       | 1.254724904              | 0.907760303     | 0.890425733                 | 0.933703704       | 2.439402732        |

**Supplementary Tables pertaining to Figure 3**

**Supplementary Table S19. Loci enriched in individual cell types from microarray data**

**Loci enriched in Columella (PET111) from micorarray expression data analysis (1.7 fold, p <0.5)**

| Affymetrix Probeset | Locus     | Mean Microarray Expression Values |                          |                 |                             |                   |                    |
|---------------------|-----------|-----------------------------------|--------------------------|-----------------|-----------------------------|-------------------|--------------------|
|                     |           | Root Hairs (COBL9)                | Non-Hair Epidermis (WER) | Cortex (CORTEX) | Endodermis/ Quiescent (SCR) | Vasculature (WOL) | Columella (PET111) |
| 248237_at           | AT5G53890 | 0.414354827                       | 1.649067209              | 0.637678233     | 0.693032809                 | 0.762995496       | 4.992243001        |
| 248178_at           | AT5G54370 | 18.48790635                       | 23.28176478              | 4.296540418     | 5.09936747                  | 3.98019371        | 39.72959186        |
| 248121_at           | AT5G54690 | 0.725626103                       | 0.653840628              | 0.691223509     | 1.063336047                 | 2.683894152       | 7.263942264        |
| 248128_at           | AT5G54770 | 0.843382955                       | 0.635837461              | 0.745897328     | 0.827622461                 | 0.905816157       | 2.00945696         |
| 248112_at           | AT5G55350 | 0.732159085                       | 0.761046333              | 0.618035457     | 0.684472922                 | 0.759613347       | 1.381379995        |
| 248039_at           | AT5G55950 | 1.11045917                        | 0.617584526              | 0.5757121       | 0.63452781                  | 0.908094048       | 4.102639036        |
| 247985_at           | AT5G56790 | 0.584552573                       | 1.558928726              | 0.702256958     | 1.840669528                 | 1.489713442       | 5.557715459        |
| 247902_at           | AT5G57350 | 0.391818645                       | 0.389178958              | 0.50844213      | 0.954182909                 | 1.236064058       | 2.115044224        |
| 247904_at           | AT5G57390 | 0.687628278                       | 0.79024362               | 0.545933011     | 0.695999708                 | 0.757795431       | 1.53431071         |
| 247906_at           | AT5G57420 | 0.529294152                       | 0.965101974              | 0.535595561     | 0.598004156                 | 0.578934239       | 7.133839124        |
| 247922_at           | AT5G57500 | 1.653706362                       | 2.641620634              | 0.594456799     | 0.534786159                 | 0.554297975       | 10.46591799        |
| 247874_at           | AT5G57710 | 2.74115951                        | 0.801775378              | 2.430591658     | 1.217427689                 | 1.14768196        | 6.623166452        |
| 247802_at           | AT5G58580 | 0.604900239                       | 0.58306803               | 0.524489093     | 0.567920904                 | 0.633695384       | 4.820230919        |
| 247657_at           | AT5G59845 | 0.413615018                       | 0.402336988              | 0.430311203     | 0.720401675                 | 1.02339283        | 2.313975711        |
| 247648_at           | AT5G60020 | 0.813210685                       | 0.620237503              | 0.847322453     | 1.870649392                 | 3.835543361       | 11.9749517         |
| 247645_at           | AT5G60530 | 12.00702679                       | 17.29816401              | 1.59701466      | 2.064784359                 | 2.030307417       | 35.49825113        |
| 247640_at           | AT5G60610 | 0.480573566                       | 0.47656389               | 0.450237807     | 0.549668026                 | 0.540177965       | 1.055521737        |
| 247610_at           | AT5G60630 | 0.886071592                       | 1.822479086              | 0.714313476     | 0.802855126                 | 0.770288438       | 11.9491666         |
| 247611_at           | AT5G60710 | 2.03286624                        | 1.847249134              | 0.902368894     | 1.243596081                 | 1.205812586       | 4.412537908        |
| 247590_at           | AT5G60720 | 0.50953244                        | 0.465960172              | 0.490389869     | 0.823727899                 | 1.864411722       | 4.312054673        |
| 247601_at           | AT5G60850 | 0.675104404                       | 0.811581132              | 1.249027808     | 1.284098285                 | 1.529862526       | 2.800941461        |
| 247452_at           | AT5G62430 | 0.808871615                       | 0.775539721              | 0.868457047     | 1.267555883                 | 0.974201478       | 3.558718677        |
| 247437_at           | AT5G62490 | 0.597450018                       | 0.547807389              | 0.539498523     | 0.605550068                 | 0.649154332       | 1.137315977        |
| 247331_at           | AT5G63530 | 1.358353438                       | 1.237046515              | 1.212913341     | 1.679973281                 | 2.100226126       | 4.613528631        |
| 247304_at           | AT5G63850 | 0.613649876                       | 0.669684968              | 0.681963023     | 0.941945753                 | 0.951465474       | 3.240742222        |
| 247282_at           | AT5G64240 | 0.808492614                       | 0.632255481              | 0.851121819     | 1.181370955                 | 1.112640031       | 2.689984388        |
| 247216_at           | AT5G64860 | 0.460017798                       | 0.985349685              | 0.889777062     | 0.970378999                 | 1.083707703       | 3.164627385        |
| 247208_at           | AT5G64870 | 1.585871321                       | 0.565475387              | 0.766433974     | 2.145436517                 | 1.194140582       | 3.858925995        |
| 247153_at           | AT5G65700 | 1.897998499                       | 3.837805391              | 2.520141344     | 3.845329843                 | 4.163937074       | 7.658920779        |
| 247094_at           | AT5G66280 | 11.74170366                       | 12.19740175              | 6.372605076     | 1.992078755                 | 1.794353315       | 26.8203055         |
| 247038_at           | AT5G67160 | 0.723109343                       | 0.637300244              | 0.954726703     | 1.167513324                 | 1.140562744       | 2.267031087        |



**Supplementary Tables pertaining to Figure 3**

**Supplementary Table S19. Loci enriched in individual cell types from microarray data**

**Loci enriched in Columella (PET111) from micorarray expression data analysis (1.7 fold, p <0.5)**

| Affymetrix<br>Probeset | Locus     | Mean Microarray Expression Values |                                |                    |                                   |                      |                       |
|------------------------|-----------|-----------------------------------|--------------------------------|--------------------|-----------------------------------|----------------------|-----------------------|
|                        |           | Root Hairs<br>(COBL9)             | Non-Hair<br>Epidermis<br>(WER) | Cortex<br>(CORTEX) | Endodermis/<br>Quiescent<br>(SCR) | Vasculature<br>(WOL) | Columella<br>(PET111) |
| 247031_at              | AT5G67230 | 0.667415395                       | 0.534395919                    | 0.578653785        | 0.70109185                        | 1.49277047           | 2.661167414           |
| 246986_at              | AT5G67280 | 0.592058775                       | 0.721559269                    | 0.982531056        | 1.122682834                       | 1.130857144          | 2.815581723           |

**Supplementary Tables pertaining to Figure 3**

**Supplementary Table S20. Root cell type biomarkers**

**Root Hair Biomarkers: Proteins Identified Only in Root Hairs (COBL9) that were also enriched in this cell type (1.7 fold,  $p < 0.05$ ) in RNA expression data**

| Affymetrix Probeset | Locus     | Annotation                                                                                             | Root Hairs (COBL9) | Mean Microarray Expression Values |                 |                             |                   |                    |
|---------------------|-----------|--------------------------------------------------------------------------------------------------------|--------------------|-----------------------------------|-----------------|-----------------------------|-------------------|--------------------|
|                     |           |                                                                                                        |                    | Non-Hair Epidermis (WER)          | Cortex (CORTEX) | Endodermis/ Quiescent (SCR) | Vasculature (WOL) | Columella (PET111) |
| 259486_at           | AT1G15710 | prephenate dehydrogenase family protein, contains Pfam profile: PF02153 prephenate dehydrogenase       | 3.349547712        | 1.955732468                       | 1.446796127     | 1.159425507                 | 1.409721486       | 1.417230051        |
| 260899_at           | AT1G21370 | expressed protein                                                                                      | 11.02950709        | 4.090569886                       | 5.777314045     | 3.107166852                 | 2.879492743       | 4.645647995        |
| 265102_at           | AT1G30870 | cationic peroxidase, putative, similar to cationic peroxidase (gi:1232069); similar to EST gb:AI100412 | 29.26649439        | 6.119595789                       | 1.215674212     | 2.232677527                 | 4.666007882       | 1.479413597        |
| 262641_at           | AT1G62730 | expressed protein                                                                                      | 2.504203579        | 1.400996357                       | 1.035569994     | 0.883670474                 | 1.146095388       | 0.994338229        |
| 261550_at           | AT1G63450 | exostosin family protein, contains Pfam profile: PF03016                                               | 9.996851076        | 2.072149195                       | 0.61475174      | 0.677585192                 | 1.108367087       | 0.904885377        |

**Supplementary Tables pertaining to Figure 3**

**Supplementary Table S20. Root cell type biomarkers**

**Root Hair Biomarkers: Proteins Identified Only in Root Hairs (COBL9) that were also enriched in this cell type (1.7 fold,  $p < 0.05$ ) in RNA expression data**

| Affymetrix Probeset | Locus     | Annotation                                                                                                                                                                                                                                                                                                                                                                                     | Root Hairs (COBL9) | Mean Microarray Expression Values |                 |                             |                   |                    |
|---------------------|-----------|------------------------------------------------------------------------------------------------------------------------------------------------------------------------------------------------------------------------------------------------------------------------------------------------------------------------------------------------------------------------------------------------|--------------------|-----------------------------------|-----------------|-----------------------------|-------------------|--------------------|
|                     |           |                                                                                                                                                                                                                                                                                                                                                                                                |                    | Non-Hair Epidermis (WER)          | Cortex (CORTEX) | Endodermis/ Quiescent (SCR) | Vasculature (WOL) | Columella (PET111) |
| 263565_at           | AT2G15390 | FUT4_ATFUT4__x<br>yloglucan<br>fucosyltransferase,<br>putative (FUT4),<br>identical to<br>SP:Q9SJP2<br>Probable<br>fucosyltransferase<br>4 (EC 2.4.1.-)<br>(AtFUT4)<br>{Arabidopsis<br>thaliana}; similar to<br>SP:Q9SWH5<br>Galactoside 2-<br>alpha-L-<br>fucosyltransferase<br>(EC 2.4.1.69)<br>(Xyloglucan alpha-<br>(1,2)-<br>fucosyltransferase)<br>(AtFUT1)<br>{Arabidopsis<br>thaliana} | 3.793711249        | 1.854523242                       | 1.722786581     | 0.750288885                 | 0.842964194       | 0.682665858        |
| 267160_at           | AT2G37670 | WD-40 repeat<br>family protein,<br>contains 6 WD-40<br>repeats<br>(PF00400); similiar<br>to rab11 binding<br>protein<br>(G1:4512103) (Bos<br>taurus)                                                                                                                                                                                                                                           | 1.9831187          | 0.821726928                       | 0.658934544     | 0.527714229                 | 0.621620215       | 0.839815341        |

**Supplementary Tables pertaining to Figure 3**

**Supplementary Table S20. Root cell type biomarkers**

**Root Hair Biomarkers: Proteins Identified Only in Root Hairs (COBL9) that were also enriched in this cell type (1.7 fold,  $p < 0.05$ ) in RNA expression data**

| Affymetrix Probeset | Locus     | Annotation                                                                                                                                          | Root Hairs (COBL9) | Mean Microarray Expression Values |                 |                             |                   |                    |
|---------------------|-----------|-----------------------------------------------------------------------------------------------------------------------------------------------------|--------------------|-----------------------------------|-----------------|-----------------------------|-------------------|--------------------|
|                     |           |                                                                                                                                                     |                    | Non-Hair Epidermis (WER)          | Cortex (CORTEX) | Endodermis/ Quiescent (SCR) | Vasculature (WOL) | Columella (PET111) |
| 245172_at           | AT2G47540 | pollen Ole e 1 allergen and extensin family protein, contains Pfam domain, PF01190: Pollen proteins Ole e I family                                  | 32.96739091        | 9.699127898                       | 1.158309845     | 1.433289202                 | 2.356085561       | 1.083314431        |
| 257924_at           | AT3G23190 | lesion inducing protein-related, similar to ORF, able to induce HR-like lesions (Nicotiana tabacum)                                                 | 21.72218486        | 3.259058347                       | 1.083496123     | 1.042912533                 | 1.611341643       | 1.042869254        |
| 257144_at           | AT3G27300 | G6PD5__glucose-6-phosphate 1-dehydrogenase / G6PD (ACG9), identical to glucose-6-phosphate 1-dehydrogenase (acg9) (Arabidopsis thaliana) GI:5732195 | 6.868998452        | 3.307803561                       | 0.913901483     | 1.479300066                 | 1.013707473       | 1.064181043        |

**Supplementary Tables pertaining to Figure 3**

**Supplementary Table S20. Root cell type biomarkers**

**Root Hair Biomarkers: Proteins Identified Only in Root Hairs (COBL9) that were also enriched in this cell type (1.7 fold,  $p < 0.05$ ) in RNA expression data**

| Affymetrix Probeset | Locus     | Annotation                                                                                                                         | Root Hairs (COBL9) | Mean Microarray Expression Values |                 |                             |                   |                    |
|---------------------|-----------|------------------------------------------------------------------------------------------------------------------------------------|--------------------|-----------------------------------|-----------------|-----------------------------|-------------------|--------------------|
|                     |           |                                                                                                                                    |                    | Non-Hair Epidermis (WER)          | Cortex (CORTEX) | Endodermis/ Quiescent (SCR) | Vasculature (WOL) | Columella (PET111) |
| 251973_at           | AT3G53180 | glutamine synthetase, putative, similar to glutamine synthetase (glutamate-- ammonia ligase) (Bacillus subtilis) SWISS-PROT:P12425 | 17.44707864        | 5.487026304                       | 7.01058528      | 3.266296095                 | 2.062995207       | 1.994137427        |
| 255005_at           | AT4G09990 | expressed protein, contains Pfam profile PF04669: Protein of unknown function (DUF579)                                             | 23.18906269        | 6.882259296                       | 1.22080574      | 1.440892545                 | 3.997105863       | 4.500734934        |

**Supplementary Tables pertaining to Figure 3**

**Supplementary Table S20. Root cell type biomarkers**

**Root Hair Biomarkers: Proteins Identified Only in Root Hairs (COBL9) that were also enriched in this cell type (1.7 fold,  $p < 0.05$ ) in RNA expression data**

| Affymetrix Probeset | Locus     | Annotation                                                                                                                                                                                                                                                                                                      | Root Hairs (COBL9) | Mean Microarray Expression Values |                 |                             |                   |                    |
|---------------------|-----------|-----------------------------------------------------------------------------------------------------------------------------------------------------------------------------------------------------------------------------------------------------------------------------------------------------------------|--------------------|-----------------------------------|-----------------|-----------------------------|-------------------|--------------------|
|                     |           |                                                                                                                                                                                                                                                                                                                 |                    | Non-Hair Epidermis (WER)          | Cortex (CORTEX) | Endodermis/ Quiescent (SCR) | Vasculature (WOL) | Columella (PET111) |
| 245484_at           | AT4G16210 | enoyl-CoA hydratase/isomerase family protein, similar to 3-hydroxybutyryl-CoA dehydratase (Crotonase) from <i>Clostridium acetobutylicum</i> (SP:P52046), FadB1x (enoyl-CoA hydratase) from <i>Pseudomonas putida</i> (GI:13310130); contains Pfam profile PF00378 enoyl-CoA hydratase/isomerase family protein | 7.255701671        | 3.227990117                       | 3.411651512     | 1.934220883                 | 1.75728261        | 1.863429591        |

**Supplementary Tables pertaining to Figure 3**

**Supplementary Table S20. Root cell type biomarkers**

**Root Hair Biomarkers: Proteins Identified Only in Root Hairs (COBL9) that were also enriched in this cell type (1.7 fold,  $p < 0.05$ ) in RNA expression data**

| Affymetrix Probeset | Locus     | Annotation                                                                                                                                                                                                                                                            | Root Hairs (COBL9) | Mean Microarray Expression Values |                 |                             |                   |                    |
|---------------------|-----------|-----------------------------------------------------------------------------------------------------------------------------------------------------------------------------------------------------------------------------------------------------------------------|--------------------|-----------------------------------|-----------------|-----------------------------|-------------------|--------------------|
|                     |           |                                                                                                                                                                                                                                                                       |                    | Non-Hair Epidermis (WER)          | Cortex (CORTEX) | Endodermis/ Quiescent (SCR) | Vasculature (WOL) | Columella (PET111) |
| 254468_at           | AT4G20460 | NAD-dependent epimerase/dehydratase family protein, similar to UDP-galactose 4-epimerase from <i>Cyamopsis tetragonoloba</i> GI:3021357 (EMBL:AJ005082), <i>Bacillus subtilis</i> SP:P55180; contains Pfam profile PF01370 NAD dependent epimerase/dehydratase family | 13.0876895         | 4.470302291                       | 3.746529008     | 3.537187832                 | 1.671318347       | 1.008696536        |
| 253998_at           | AT4G26010 | peroxidase, putative, peroxidase ATP13a - <i>Arabidopsis thaliana</i> , PID:e264765; identical to cDNA class III peroxidase ATP35, GI:17530565                                                                                                                        | 9.313683744        | 3.343634451                       | 1.56439787      | 3.970742651                 | 4.182537327       | 1.419425618        |
| 254521_at           | AT5G44820 | expressed protein, similar to unknown protein (pir::T04881)                                                                                                                                                                                                           | 6.841962989        | 1.916413575                       | 0.980855352     | 0.478916603                 | 0.663954812       | 0.536020969        |

**Supplementary Tables pertaining to Figure 3**

**Supplementary Table S20. Root cell type biomarkers**

**Root Hair Biomarkers: Proteins Identified Only in Root Hairs (COBL9) that were also enriched in this cell type (1.7 fold,  $p < 0.05$ ) in RNA expression data**

| Affymetrix Probeset | Locus     | Annotation                                                                                                                                              | Root Hairs (COBL9) | Mean Microarray Expression Values |                 |                             |                   |                    |
|---------------------|-----------|---------------------------------------------------------------------------------------------------------------------------------------------------------|--------------------|-----------------------------------|-----------------|-----------------------------|-------------------|--------------------|
|                     |           |                                                                                                                                                         |                    | Non-Hair Epidermis (WER)          | Cortex (CORTEX) | Endodermis/ Quiescent (SCR) | Vasculature (WOL) | Columella (PET111) |
| 248652_at           | AT5G49270 | COBL9; phytochelatinsynthetase-related, contains Pfam PF04833: Phytochelatinsynthetase-like conserved region                                            | 26.35831667        | 7.037165721                       | 1.699631882     | 1.95741069                  | 2.557357167       | 1.480283545        |
| 248562_at           | AT5G49680 | cell expansion protein, putative, similar to SABRE (Arabidopsis thaliana) GI:719291                                                                     | 4.531574955        | 2.098588537                       | 0.756013934     | 0.716298602                 | 0.841458557       | 1.624108895        |
| 248162_at           | AT5G54500 | FQR1__quinone reductase, putative, similar to 1,4-benzoquinone reductase (Phanerochaete chrysosporium)(GI: 4454993); contains flavodoxin domain PF00258 | 18.76963794        | 5.053339414                       | 10.44207374     | 10.17027372                 | 6.89654573        | 7.866507718        |



**Supplementary Tables pertaining to Figure 3**

**Supplementary Table S20. Root cell type biomarkers**

**Root Hair Biomarkers: Proteins Identified Only in Non-Hair Epidermis (WER) that were also enriched in this cell type (1.7 fold,  $p < 0.05$ ) in RNA expression data**

| Affymetrix Probeset | Locus     | Annotation                                                                                                                                                                                                        | Root Hairs (COBL9) | Mean Microarray Expression Values |                 |                             |                   |                    |
|---------------------|-----------|-------------------------------------------------------------------------------------------------------------------------------------------------------------------------------------------------------------------|--------------------|-----------------------------------|-----------------|-----------------------------|-------------------|--------------------|
|                     |           |                                                                                                                                                                                                                   |                    | Non-Hair Epidermis (WER)          | Cortex (CORTEX) | Endodermis/ Quiescent (SCR) | Vasculature (WOL) | Columella (PET111) |
| 255751_at           | AT1G31950 | terpene synthase/cyclase family protein, similar to sesquiterpene synthases (GI:11934937)(Lycopersicon hirsutum), (GI:11934933)(Lycopersicon esculentum); contains Pfam profile: PF01397: Terpene synthase family | 1.351196296        | 6.825177784                       | 3.500261546     | 0.822523685                 | 0.989691043       | 0.963566385        |
| 264702_at           | AT1G70190 | ribosomal protein L12 family protein, contains similarity to ribosomal protein GI:7270590 from (Arabidopsis thaliana)                                                                                             | 0.739737901        | 3.303000341                       | 0.75827552      | 0.621033329                 | 0.870659702       | 0.655652956        |
| 251938_at           | AT3G53430 | 60S ribosomal protein L12 (RPL12B), 60S RIBOSOMAL PROTEIN L12, Prunus armeniaca, SWISSPROT:RL12_PRUAR                                                                                                             | 16.18203296        | 35.61462681                       | 12.30807521     | 15.00948713                 | 20.18923067       | 9.19847477         |

**Supplementary Tables pertaining to Figure 3**

**Supplementary Table S20. Root cell type biomarkers**

**Root Hair Biomarkers: Proteins Identified Only in Non-Hair Epidermis (WER) that were also enriched in this cell type (1.7 fold,  $p < 0.05$ ) in RNA expression data**

| Affymetrix Probeset | Locus     | Annotation                                                                                                                                                                                    | Root Hairs (COBL9) | Mean Microarray Expression Values |                 |                             |                   |                    |
|---------------------|-----------|-----------------------------------------------------------------------------------------------------------------------------------------------------------------------------------------------|--------------------|-----------------------------------|-----------------|-----------------------------|-------------------|--------------------|
|                     |           |                                                                                                                                                                                               |                    | Non-Hair Epidermis (WER)          | Cortex (CORTEX) | Endodermis/ Quiescent (SCR) | Vasculature (WOL) | Columella (PET111) |
| 250992_at           | AT5G02260 | ATEXPA9_ATEXP9_ATHEXP ALPHA 1.10_EXP9__expansin, putative (EXP9), similar to expansin precursor GI:4138914 from ( <i>Lycopersicon esculentum</i> ); alpha-expansin gene family, PMID:11641069 | 3.221214528        | 13.77040078                       | 2.588498013     | 0.627560987                 | 0.801968371       | 5.401973136        |
| 246537_at           | AT5G15940 | short-chain dehydrogenase/reductase (SDR) family protein, similar to forever young oxidoreductase GI:18138083 from ( <i>Lycopersicon esculentum</i> )                                         | 1.076284251        | 2.056433692                       | 0.631369091     | 0.624907332                 | 0.700810651       | 0.84019682         |

**Supplementary Tables pertaining to Figure 3**

**Supplementary Table S20. Root cell type biomarkers**

**Root Hair Biomarkers: Proteins Identified Only in Non-Hair Epidermis (WER) that were also enriched in this cell type (1.7 fold,  $p < 0.05$ ) in RNA expression data**

| Affymetrix Probeset | Locus     | Annotation                                                                                                                                                               | Root Hairs (COBL9) | Mean Microarray Expression Values |                 |                             |                   |                    |
|---------------------|-----------|--------------------------------------------------------------------------------------------------------------------------------------------------------------------------|--------------------|-----------------------------------|-----------------|-----------------------------|-------------------|--------------------|
|                     |           |                                                                                                                                                                          |                    | Non-Hair Epidermis (WER)          | Cortex (CORTEX) | Endodermis/ Quiescent (SCR) | Vasculature (WOL) | Columella (PET111) |
| 245937_at           | AT5G19750 | peroxisomal membrane 22 kDa family protein, similar to SP:P42925 22 kDa peroxisomal membrane protein {Mus musculus}; contains Pfam profile PF04117: Mpv17 / PMP22 family | 1.593756009        | 4.494213166                       | 2.38800243      | 1.481674134                 | 2.026796007       | 1.103139917        |
| 248131_at           | AT5G54830 | DOMON domain-containing protein / dopamine beta-monoxygenase N-terminal domain-containing protein, contains Pfam PF03351: DOMON domain                                   | 0.977162769        | 2.262576459                       | 0.880080333     | 0.631129624                 | 0.853943056       | 0.882128914        |

**Supplementary Tables pertaining to Figure 3**

**Supplementary Table S20. Root cell type biomarkers**

**Root Hair Biomarkers: Proteins Identified Only in Cortex (CORTEX) that were also enriched in this cell type (1.7 fold,  $p < 0.05$ ) in RNA expression data**

| Affymetrix Probeset | Locus     | Annotation                                                                                                                                                                                                                                         | Root Hairs (COBL9) | Mean Microarray Expression Values |                 |                             |                   |                    |
|---------------------|-----------|----------------------------------------------------------------------------------------------------------------------------------------------------------------------------------------------------------------------------------------------------|--------------------|-----------------------------------|-----------------|-----------------------------|-------------------|--------------------|
|                     |           |                                                                                                                                                                                                                                                    |                    | Non-Hair Epidermis (WER)          | Cortex (CORTEX) | Endodermis/ Quiescent (SCR) | Vasculature (WOL) | Columella (PET111) |
| Affymetrix Probeset | Locus     | Annotation                                                                                                                                                                                                                                         | Root Hairs (COBL9) | Non-Hair Epidermis (WER)          | Cortex (CORTEX) | Endodermis/ Quiescent (SCR) | Vasculature (WOL) | Columella (PET111) |
| 262626_at           | AT1G06430 | FTSH8__encodes a FtsH protease that is localized to the chloroplast                                                                                                                                                                                | 0.808416069        | 0.618892735                       | 1.514055517     | 0.68734792                  | 0.659110202       | 0.648147836        |
| 265768_at           | AT2G48020 | sugar transporter, putative, similar to ERD6 protein {Arabidopsis thaliana} GI:3123712, sugar-porter family proteins 1 and 2 (Arabidopsis thaliana) GI:14585699, GI:14585701; contains Pfam profile PF00083: major facilitator superfamily protein | 4.754682848        | 2.089936802                       | 16.80413015     | 5.094057004                 | 1.839738676       | 1.449043374        |

**Supplementary Tables pertaining to Figure 3**

**Supplementary Table S20. Root cell type biomarkers**

**Root Hair Biomarkers: Proteins Identified Only in Cortex (CORTEX) that were also enriched in this cell type (1.7 fold,  $p < 0.05$ ) in RNA expression data**

| Affymetrix Probeset | Locus     | Annotation                                                                                                                                                                                                                                                                                     | Root Hairs (COBL9) | Non-Hair Epidermis (WER) | Mean Microarray Expression Values |                             |                   |                    |
|---------------------|-----------|------------------------------------------------------------------------------------------------------------------------------------------------------------------------------------------------------------------------------------------------------------------------------------------------|--------------------|--------------------------|-----------------------------------|-----------------------------|-------------------|--------------------|
|                     |           |                                                                                                                                                                                                                                                                                                |                    |                          | Cortex (CORTEX)                   | Endodermis/ Quiescent (SCR) | Vasculature (WOL) | Columella (PET111) |
| 254630_at           | AT4G18360 | (S)-2-hydroxy-acid oxidase, peroxisomal, putative / glycolate oxidase, putative / short chain alpha-hydroxy acid oxidase, putative, similar to (S)-2-hydroxy-acid oxidase, peroxisomal (Glycolate oxidase, GOX) (Short chain alpha-hydroxy acid oxidase) (Spinacia oleracea) SWISS-PROT:P05414 | 0.576257218        | 0.527075562              | 5.065594153                       | 2.646667624                 | 1.312830113       | 0.655002869        |
| 250868_at           | AT5G03860 | malate synthase, putative, strong similarity to glyoxysomal malate synthase from Brassica napus (SP:P13244)                                                                                                                                                                                    | 0.496188472        | 0.573808707              | 3.087789526                       | 0.815536156                 | 0.826471808       | 0.725850922        |

**Supplementary Tables pertaining to Figure 3**

**Supplementary Table S20. Root cell type biomarkers**

**Root Hair Biomarkers: Proteins Identified Only in Cortex (CORTEX) that were also enriched in this cell type (1.7 fold,  $p < 0.05$ ) in RNA expression data**

| Affymetrix Probeset | Locus     | Annotation                                                                                                                                                                                                                                                                                                                                                                       | Root Hairs (COBL9) | Non-Hair Epidermis (WER) | Mean Microarray Expression Values |                             |                   |                    |
|---------------------|-----------|----------------------------------------------------------------------------------------------------------------------------------------------------------------------------------------------------------------------------------------------------------------------------------------------------------------------------------------------------------------------------------|--------------------|--------------------------|-----------------------------------|-----------------------------|-------------------|--------------------|
|                     |           |                                                                                                                                                                                                                                                                                                                                                                                  |                    |                          | Cortex (CORTEX)                   | Endodermis/ Quiescent (SCR) | Vasculature (WOL) | Columella (PET111) |
| 250558_at           | AT5G07990 | TT7_CYP75B1_D501_F3`H__flavonoid 3`-monooxygenase / flavonoid 3`-hydroxylase (F3`H) / cytochrome P450 75B1 (CYP75B1) / transparent testa 7 protein (TT7), identical to SP:Q9SD85 Flavonoid 3`-monooxygenase (EC 1.14.13.21) (Flavonoid 3`-hydroxylase) (AtF3`H) (Cytochrome P450 75B1) (TRANSPARENT TESTA 7 protein) {Arabidopsis thaliana}; similar to gi:10334806, gi:10334808 | 0.817240809        | 0.621390615              | 5.537829487                       | 0.927530283                 | 0.703498577       | 0.630117798        |

**Supplementary Tables pertaining to Figure 3**

**Supplementary Table S20. Root cell type biomarkers**

**Root Hair Biomarkers: Proteins Identified Only in Cortex (CORTEX) that were also enriched in this cell type (1.7 fold,  $p < 0.05$ ) in RNA expression data**

| Affymetrix Probeset | Locus     | Annotation                                                                                                                                                  | Root Hairs (COBL9) | Non-Hair Epidermis (WER) | Mean Microarray Expression Values |                             |                   |                    |
|---------------------|-----------|-------------------------------------------------------------------------------------------------------------------------------------------------------------|--------------------|--------------------------|-----------------------------------|-----------------------------|-------------------|--------------------|
|                     |           |                                                                                                                                                             |                    |                          | Cortex (CORTEX)                   | Endodermis/ Quiescent (SCR) | Vasculature (WOL) | Columella (PET111) |
| 249103_at           | AT5G43600 | N-carbamyl-L-amino acid hydrolase, putative, similar to N-carbamoyl-L-amino acid hydrolase (Bacillus stearothermophilus ) SWISS-PROT:Q53389                 | 1.45051364         | 1.149183091              | 5.262393229                       | 2.102404475                 | 1.347563472       | 1.106460077        |
| 248625_at           | AT5G48880 | PKT1_PKT2_KAT5__acetyl-CoA C-acyltransferase 1 / 3-ketoacyl-CoA thiolase 1 (PKT1), identical to 3-ketoacyl-CoA-thiolase 1 (Arabidopsis thaliana) GI:3169568 | 0.559471197        | 0.586753866              | 13.47556429                       | 1.836359331                 | 1.593518704       | 0.84012408         |

**Supplementary Tables pertaining to Figure 3**

**Supplementary Table S20. Root cell type biomarkers**

**Root Hair Biomarkers: Proteins Identified Only in Vasculature (WOL) that were also enriched in this cell type (1.7 fold,  $p < 0.05$ ) in RNA expression data**

| Affymetrix Probeset | Locus     | Annotation                                                                                                                                                                                                                      | Root Hairs (COBL9) | Mean Microarray Expression Values |                 |                             |                   |                    |
|---------------------|-----------|---------------------------------------------------------------------------------------------------------------------------------------------------------------------------------------------------------------------------------|--------------------|-----------------------------------|-----------------|-----------------------------|-------------------|--------------------|
|                     |           |                                                                                                                                                                                                                                 |                    | Non-Hair Epidermis (WER)          | Cortex (CORTEX) | Endodermis/ Quiescent (SCR) | Vasculature (WOL) | Columella (PET111) |
| 264577_at           | AT1G05260 | RCI3_RCI3A__peroxidase 3 (PER3) (P3) / rare cold-inducible protein (RCI3A) (PRC), identical to SP:O23044 Peroxidase 3 precursor (EC 1.11.1.7) (Atperox P3) (Rare cold inducible protein) (RCI3A) (ATPRC) {Arabidopsis thaliana} | 0.564368249        | 0.560940597                       | 2.659246989     | 40.82502385                 | 5.410111954       | 2.730636285        |
| 258599_at           | AT3G04520 | threonine aldolase family protein, similar to L-allo-threonine aldolase SP:O07051 from (Aeromonas jandaei)                                                                                                                      | 0.821334497        | 0.552455686                       | 0.979868036     | 7.145580645                 | 1.511893769       | 0.755172685        |
| 254914_at           | AT4G11290 | peroxidase, putative, identical to peroxidase ATP19a (Arabidopsis thaliana) gi:1546692:emb:C AA67337                                                                                                                            | 0.565817953        | 0.545293347                       | 1.859108996     | 27.61945523                 | 3.294022124       | 1.811716645        |



**Supplementary Tables pertaining to Figure 3**

**Supplementary Table S20. Root cell type biomarkers**

**Root Hair Biomarkers: Proteins Identified Only in Vasculature (WOL) that were also enriched in this cell type (1.7 fold,  $p < 0.05$ ) in RNA expression data**

| Affymetrix Probeset | Locus     | Annotation                                                                                                                                                                                                    | Root Hairs (COBL9) | Mean Microarray Expression Values |                 |                             |                   |                    |
|---------------------|-----------|---------------------------------------------------------------------------------------------------------------------------------------------------------------------------------------------------------------|--------------------|-----------------------------------|-----------------|-----------------------------|-------------------|--------------------|
|                     |           |                                                                                                                                                                                                               |                    | Non-Hair Epidermis (WER)          | Cortex (CORTEX) | Endodermis/ Quiescent (SCR) | Vasculature (WOL) | Columella (PET111) |
| 259845_at           | AT1G73590 | PIN1_ATPIN1__auxin efflux carrier protein, putative (PIN1), identical to putative auxin efflux carrier protein; AtPIN1 (Arabidopsis thaliana) GI:4151319; contains Pfam profile PF03547: Auxin Efflux Carrier | 0.487984325        | 0.703257517                       | 0.639713019     | 1.355269884                 | 3.610757418       | 1.306435661        |
| 267619_at           | AT2G26730 | leucine-rich repeat transmembrane protein kinase, putative                                                                                                                                                    | 0.559910072        | 0.565351177                       | 1.689281303     | 2.233293272                 | 4.662284992       | 1.618735746        |

**Supplementary Tables pertaining to Figure 3**

**Supplementary Table S20. Root cell type biomarkers**

**Root Hair Biomarkers: Proteins Identified Only in Vasculature (WOL) that were also enriched in this cell type (1.7 fold,  $p < 0.05$ ) in RNA expression data**

| Affymetrix Probeset | Locus     | Annotation                                                                                                                                                                                                                                                   | Root Hairs (COBL9) | Mean Microarray Expression Values |                 |                             |                   |                    |
|---------------------|-----------|--------------------------------------------------------------------------------------------------------------------------------------------------------------------------------------------------------------------------------------------------------------|--------------------|-----------------------------------|-----------------|-----------------------------|-------------------|--------------------|
|                     |           |                                                                                                                                                                                                                                                              |                    | Non-Hair Epidermis (WER)          | Cortex (CORTEX) | Endodermis/ Quiescent (SCR) | Vasculature (WOL) | Columella (PET111) |
| 252080_at           | AT3G51670 | SEC14 cytosolic factor family protein / phosphoglyceride transfer family protein, similar to polyphosphoinositide binding protein Ssh2p (GI:2739046) {Glycine max};; contains Pfam PF00650 : CRAL/TRIO domain; contains Pfam PF03765 : CRAL/TRIO, N-terminus | 0.75454331         | 1.483261543                       | 1.020834087     | 1.359294791                 | 13.41430964       | 3.039716489        |
| 250752_at           | AT5G05690 | CPD_CBB3_CYP90_CYP90A1_DWF3__cytochrome P450 90A1 (CYP90A1) (CYP90) (CPD), identical to Cytochrome P450 90A1 (SP:Q42569) (Arabidopsis thaliana)                                                                                                              | 0.498687082        | 0.455701464                       | 1.084214274     | 1.184458522                 | 9.572112938       | 2.149987175        |
| 248710_at           | AT5G48480 | expressed protein                                                                                                                                                                                                                                            | 0.768893903        | 0.758998579                       | 1.008811405     | 3.941432389                 | 7.391342609       | 3.055191502        |

**Supplementary Tables pertaining to Figure 3**

**Supplementary Table S20. Root cell type biomarkers**

**Root Hair Biomarkers: Proteins Identified Only in Columella (PET111) that were also enriched in this cell type (1.7 fold,  $p < 0.05$ ) in RNA expression data**

| Affymetrix Probeset | Locus     | Annotation                                                                                                                                                                                                                     | Root Hairs (COBL9) | Mean Microarray Expression Values |                 |                             |                   |                    |
|---------------------|-----------|--------------------------------------------------------------------------------------------------------------------------------------------------------------------------------------------------------------------------------|--------------------|-----------------------------------|-----------------|-----------------------------|-------------------|--------------------|
|                     |           |                                                                                                                                                                                                                                |                    | Non-Hair Epidermis (WER)          | Cortex (CORTEX) | Endodermis/ Quiescent (SCR) | Vasculature (WOL) | Columella (PET111) |
| 264868_at           | AT1G24090 | RNase H domain-containing protein, very low similarity to GAG-POL precursor ( <i>Oryza sativa</i> (japonica cultivar-group)) GI:5902445; contains Pfam profiles PF00075: RNase H, PF04134: Protein of unknown function, DUF393 | 1.026986468        | 1.297623136                       | 0.660953725     | 0.675622749                 | 0.862376349       | 3.162785539        |
| 259596_at           | AT1G28130 | GH3.17__encodes an IAA-amido synthase that conjugates Asp and other amino acids to auxin in vitro. Lines carrying insertions in this gene are hypersensitive to auxin.                                                         | 0.922299228        | 4.252448464                       | 6.137153328     | 0.97269172                  | 0.783271009       | 14.55181411        |
| 261191_at           | AT1G32900 | PRPL11__starch synthase, putative, similar to starch synthase SP:Q42857 from ( <i>Ipomoea batatas</i> )                                                                                                                        | 0.498713533        | 0.636174092                       | 0.494302892     | 0.765150666                 | 0.574659852       | 6.074222165        |

**Supplementary Tables pertaining to Figure 3**

**Supplementary Table S20. Root cell type biomarkers**

**Root Hair Biomarkers: Proteins Identified Only in Columella (PET111) that were also enriched in this cell type (1.7 fold,  $p < 0.05$ ) in RNA expression data**

| Affymetrix Probeset | Locus     | Annotation                                                                                                                                                                                                                                 | Root Hairs (COBL9) | Mean Microarray Expression Values |                 |                             |                   |                    |
|---------------------|-----------|--------------------------------------------------------------------------------------------------------------------------------------------------------------------------------------------------------------------------------------------|--------------------|-----------------------------------|-----------------|-----------------------------|-------------------|--------------------|
|                     |           |                                                                                                                                                                                                                                            |                    | Non-Hair Epidermis (WER)          | Cortex (CORTEX) | Endodermis/ Quiescent (SCR) | Vasculature (WOL) | Columella (PET111) |
| 245200_at           | AT1G67850 | expressed protein, contains Pfam profile PF05212: Protein of unknown function (DUF707)                                                                                                                                                     | 1.442825273        | 1.834116749                       | 0.647329363     | 0.764456889                 | 0.747596582       | 5.214628172        |
| 260412_at           | AT1G69830 | AMY3_ATAMY3__<br>Encodes a plastid-localized $\alpha$ -amylase. Expression is reduced in the SEX4 mutant. Loss of function mutations show normal diurnal pattern of starch accumulation/degradation. Expression follows circadian rhythms. | 1.095360705        | 1.082380349                       | 1.018447804     | 1.502215975                 | 0.981259354       | 10.20923026        |
| 262263_at           | AT1G70940 | PIN3__auxin transport protein, putative (PIN3), similar to auxin transport protein (Arabidopsis thaliana)<br>gi:5817301:gb:AA D52695                                                                                                       | 0.707884827        | 0.546792208                       | 0.723203581     | 1.363499065                 | 2.345246381       | 4.870658555        |

**Supplementary Tables pertaining to Figure 3**

**Supplementary Table S20. Root cell type biomarkers**

**Root Hair Biomarkers: Proteins Identified Only in Columella (PET111) that were also enriched in this cell type (1.7 fold,  $p < 0.05$ ) in RNA expression data**

| Affymetrix Probeset | Locus     | Annotation                                                                                                                                                                                                                         | Root Hairs (COBL9) | Mean Microarray Expression Values |                 |                             |                   |                    |
|---------------------|-----------|------------------------------------------------------------------------------------------------------------------------------------------------------------------------------------------------------------------------------------|--------------------|-----------------------------------|-----------------|-----------------------------|-------------------|--------------------|
|                     |           |                                                                                                                                                                                                                                    |                    | Non-Hair Epidermis (WER)          | Cortex (CORTEX) | Endodermis/ Quiescent (SCR) | Vasculature (WOL) | Columella (PET111) |
| 265339_at           | AT2G18230 | inorganic pyrophosphatase (soluble) (PPA) / pyrophosphate phospho-hydrolase / PPase, nearly identical to SP:P21216 Soluble inorganic pyrophosphatase (EC 3.6.1.1) (Pyrophosphate phospho-hydrolase) (PPase) {Arabidopsis thaliana} | 0.905484121        | 2.214958552                       | 0.94334052      | 1.268431038                 | 2.067148368       | 10.13001601        |
| 263544_at           | AT2G21590 | APL4__glucose-1-phosphate adenylyltransferase large subunit, putative / ADP-glucose pyrophosphorylase, putative, strong similarity to SP:P55231                                                                                    | 0.361028405        | 0.374044187                       | 0.350489549     | 0.408029724                 | 0.414706508       | 1.675974802        |

**Supplementary Tables pertaining to Figure 3**

**Supplementary Table S20. Root cell type biomarkers**

**Root Hair Biomarkers: Proteins Identified Only in Columella (PET111) that were also enriched in this cell type (1.7 fold,  $p < 0.05$ ) in RNA expression data**

| Affymetrix Probeset | Locus     | Annotation                                                                                                                                                                                                                         | Root Hairs (COBL9) | Mean Microarray Expression Values |                 |                             |                   |                    |
|---------------------|-----------|------------------------------------------------------------------------------------------------------------------------------------------------------------------------------------------------------------------------------------|--------------------|-----------------------------------|-----------------|-----------------------------|-------------------|--------------------|
|                     |           |                                                                                                                                                                                                                                    |                    | Non-Hair Epidermis (WER)          | Cortex (CORTEX) | Endodermis/ Quiescent (SCR) | Vasculature (WOL) | Columella (PET111) |
| 266221_at           | AT2G28760 | NAD-dependent epimerase/dehydratase family protein, similar to UDP-glucuronic acid decarboxylase Uxs1p from <i>Filobasidiella neoformans</i> GI:14318327; contains Pfam profile PF01370 NAD dependent epimerase/dehydratase family | 3.071895916        | 4.293910444                       | 0.949992378     | 1.297223548                 | 2.313995376       | 10.33180752        |
| 266225_at           | AT2G28900 | mitochondrial import inner membrane translocase subunit Tim17/Tim22/Tim23 family protein, contains Pfam PF02466: Mitochondrial import inner membrane translocase subunit Tim17                                                     | 0.692390402        | 1.401759043                       | 0.697178382     | 1.842415061                 | 0.986624111       | 11.48191735        |

**Supplementary Tables pertaining to Figure 3**

**Supplementary Table S20. Root cell type biomarkers**

**Root Hair Biomarkers: Proteins Identified Only in Columella (PET111) that were also enriched in this cell type (1.7 fold,  $p < 0.05$ ) in RNA expression data**

| Affymetrix Probeset | Locus     | Annotation                                                                                                                                                                                                                 | Root Hairs (COBL9) | Mean Microarray Expression Values |                 |                             |                   |                    |
|---------------------|-----------|----------------------------------------------------------------------------------------------------------------------------------------------------------------------------------------------------------------------------|--------------------|-----------------------------------|-----------------|-----------------------------|-------------------|--------------------|
|                     |           |                                                                                                                                                                                                                            |                    | Non-Hair Epidermis (WER)          | Cortex (CORTEX) | Endodermis/ Quiescent (SCR) | Vasculature (WOL) | Columella (PET111) |
| 266925_at           | AT2G45740 | peroxisomal biogenesis factor 11 family protein / PEX11 family protein, contains Pfam profile PF05648: Peroxisomal biogenesis factor 11 (PEX11)                                                                            | 1.086127975        | 0.822001584                       | 1.048094126     | 0.789069392                 | 0.787684043       | 2.721555455        |
| 256676_at           | AT3G52180 | protein tyrosine phosphatase/kinase interaction sequence protein (PTPKIS1), identical to PTPKIS1 protein (Arabidopsis thaliana) GI:11595504; contains Pfam profile PF00782: Dual specificity phosphatase, catalytic domain | 0.58302275         | 0.68056289                        | 0.61532351      | 0.755531341                 | 0.602919664       | 3.310993288        |

**Supplementary Tables pertaining to Figure 3**

**Supplementary Table S20. Root cell type biomarkers**

**Root Hair Biomarkers: Proteins Identified Only in Columella (PET111) that were also enriched in this cell type (1.7 fold,  $p < 0.05$ ) in RNA expression data**

| Affymetrix Probeset | Locus     | Annotation                                                                                                                                                                                          | Root Hairs (COBL9) | Mean Microarray Expression Values |                 |                             |                   |                    |
|---------------------|-----------|-----------------------------------------------------------------------------------------------------------------------------------------------------------------------------------------------------|--------------------|-----------------------------------|-----------------|-----------------------------|-------------------|--------------------|
|                     |           |                                                                                                                                                                                                     |                    | Non-Hair Epidermis (WER)          | Cortex (CORTEX) | Endodermis/ Quiescent (SCR) | Vasculature (WOL) | Columella (PET111) |
| 251739_at           | AT3G56170 | CAN__Ca(2+)-dependent nuclease, identical to Ca(2+)-dependent nuclease (Arabidopsis thaliana) GI:7684292; supporting cDNA gi:7684291:dbj:D84226.1:                                                  | 5.845221332        | 2.745583313                       | 2.181478123     | 1.524059174                 | 2.033775031       | 13.68958577        |
| 255637_at           | AT4G00750 | dehydration-responsive family protein, similar to early-responsive to dehydration stress ERD3 protein (Arabidopsis thaliana) GI:15320410; contains Pfam profile PF03141: Putative methyltransferase | 0.582515324        | 0.694335317                       | 0.47951693      | 0.582449225                 | 0.540809493       | 6.041932073        |
| 254575_at           | AT4G19460 | glycosyl transferase family 1 protein, contains Pfam profile: PF00534 Glycosyl transferases group 1                                                                                                 | 0.784913493        | 1.409862697                       | 0.438068982     | 0.63367758                  | 0.517573267       | 8.438997229        |



**Supplementary Tables pertaining to Figure 3**

**Supplementary Table S20. Root cell type biomarkers**

**Root Hair Biomarkers: Proteins Identified Only in Columella (PET111) that were also enriched in this cell type (1.7 fold,  $p < 0.05$ ) in RNA expression data**

| Affymetrix Probeset | Locus     | Annotation                                                                                                                                                                                                                    | Root Hairs (COBL9) | Mean Microarray Expression Values |                 |                             |                   |                    |
|---------------------|-----------|-------------------------------------------------------------------------------------------------------------------------------------------------------------------------------------------------------------------------------|--------------------|-----------------------------------|-----------------|-----------------------------|-------------------|--------------------|
|                     |           |                                                                                                                                                                                                                               |                    | Non-Hair Epidermis (WER)          | Cortex (CORTEX) | Endodermis/ Quiescent (SCR) | Vasculature (WOL) | Columella (PET111) |
| 254188_at           | AT4G23920 | UDP-glucose 4-epimerase, putative / UDP-galactose 4-epimerase, putative / Galactowaldenase, putative, similar to UDP-galactose 4-epimerase from Arabidopsis thaliana SP:Q42605, Cyamopsis tetragonoloba GI:3021357 (AJ005082) | 0.764948919        | 0.992165921                       | 0.85050841      | 0.810010032                 | 0.761858326       | 5.65960925         |
| 254068_at           | AT4G25450 | ATNAP8__ABC transporter family protein, similar to multidrug resistance protein 2 SP:P21440 from (Mus musculus)                                                                                                               | 0.86901689         | 1.077505354                       | 1.307370721     | 1.513541724                 | 1.763198555       | 3.537169365        |

**Supplementary Tables pertaining to Figure 3**

**Supplementary Table S20. Root cell type biomarkers**

**Root Hair Biomarkers: Proteins Identified Only in Columella (PET111) that were also enriched in this cell type (1.7 fold,  $p < 0.05$ ) in RNA expression data**

| Affymetrix Probeset | Locus     | Annotation                                                                                                                                  | Root Hairs (COBL9) | Mean Microarray Expression Values |                 |                             |                   |                    |
|---------------------|-----------|---------------------------------------------------------------------------------------------------------------------------------------------|--------------------|-----------------------------------|-----------------|-----------------------------|-------------------|--------------------|
|                     |           |                                                                                                                                             |                    | Non-Hair Epidermis (WER)          | Cortex (CORTEX) | Endodermis/ Quiescent (SCR) | Vasculature (WOL) | Columella (PET111) |
| 253914_at           | AT4G27400 | late embryogenesis abundant protein-related / LEA protein-related, similar to late embryogenesis abundant protein (Picea glauca) GI:1350543 | 3.940805244        | 5.66465752                        | 1.107604774     | 1.397434396                 | 0.974307366       | 24.31015063        |

**Supplementary Tables pertaining to Figure 3**

**Supplementary Table S20. Root cell type biomarkers**

**Root Hair Biomarkers: Proteins Identified Only in Columella (PET111) that were also enriched in this cell type (1.7 fold,  $p < 0.05$ ) in RNA expression data**

| Affymetrix Probeset | Locus     | Annotation                                                                                                                                                                                                                                                                                                                                                                                                                       | Root Hairs (COBL9) | Mean Microarray Expression Values |                 |                             |                   |                    |
|---------------------|-----------|----------------------------------------------------------------------------------------------------------------------------------------------------------------------------------------------------------------------------------------------------------------------------------------------------------------------------------------------------------------------------------------------------------------------------------|--------------------|-----------------------------------|-----------------|-----------------------------|-------------------|--------------------|
|                     |           |                                                                                                                                                                                                                                                                                                                                                                                                                                  |                    | Non-Hair Epidermis (WER)          | Cortex (CORTEX) | Endodermis/ Quiescent (SCR) | Vasculature (WOL) | Columella (PET111) |
| 246511_at           | AT5G15490 | UDP-glucose 6-dehydrogenase, putative, very strong similarity to SP:Q96558 UDP-glucose 6-dehydrogenase (EC 1.1.1.22) (UDP-Glc dehydrogenase) (UDP-GlcDH) (UDPGDH) {Glycine max}; contains Pfam profiles PF03721: UDP-glucose/GDP-mannose dehydrogenase family NAD binding domain, PF00984: UDP-glucose/GDP-mannose dehydrogenase family central domain, PF03720: UDP-glucose/GDP-mannose dehydrogenase family UDP binding domain | 11.26141053        | 10.01382887                       | 7.129351902     | 3.732729143                 | 11.74420033       | 20.21091684        |

**Supplementary Tables pertaining to Figure 3**

**Supplementary Table S20. Root cell type biomarkers**

**Root Hair Biomarkers: Proteins Identified Only in Columella (PET111) that were also enriched in this cell type (1.7 fold,  $p < 0.05$ ) in RNA expression data**

| Affymetrix Probeset | Locus     | Annotation                                                                                                                          | Root Hairs (COBL9) | Mean Microarray Expression Values |                 |                             |                   |                    |
|---------------------|-----------|-------------------------------------------------------------------------------------------------------------------------------------|--------------------|-----------------------------------|-----------------|-----------------------------|-------------------|--------------------|
|                     |           |                                                                                                                                     |                    | Non-Hair Epidermis (WER)          | Cortex (CORTEX) | Endodermis/ Quiescent (SCR) | Vasculature (WOL) | Columella (PET111) |
| 247094_at           | AT5G66280 | GMD1__GDP-D-mannose 4,6-dehydratase, putative, strong similarity to GDP-D-mannose-4,6-dehydratase (Arabidopsis thaliana) GI:1764100 | 11.74170366        | 12.19740175                       | 6.372605076     | 1.992078755                 | 1.794353315       | 26.8203055         |

**Supplementary Tables pertaining to Figure 3**

**Supplementary Table S21. Proteins of the root cellular proteome with gene ontology (GO) annotations associated with the cell wall**

| Locus     | Root Hairs (COBL9) | Non-Hair Epidermis (WER) | Cortex (CORTEX) | Endodermis/ Quiescent (SCR) | Vasculature (WOL) | Columella (PET111) | GO Identifier | GO Description                                                                   |
|-----------|--------------------|--------------------------|-----------------|-----------------------------|-------------------|--------------------|---------------|----------------------------------------------------------------------------------|
| AT1G04040 | 1                  | 0                        | 1               | 0                           | 1                 | 0                  | GO:0009505    | cell wall (sensu Magnoliophyta)                                                  |
| AT1G04980 | 1                  | 0                        | 1               | 0                           | 1                 | 1                  | GO:0009505    | cell wall (sensu Magnoliophyta)                                                  |
| AT1G11580 | 0                  | 0                        | 1               | 1                           | 1                 | 0                  | GO:0009505    | cell wall (sensu Magnoliophyta)                                                  |
| AT1G14080 | 1                  | 1                        | 0               | 0                           | 1                 | 1                  | GO:0042546    | cell wall biosynthesis                                                           |
| AT1G27450 | 1                  | 0                        | 0               | 0                           | 0                 | 1                  | GO:0009505    | cell wall (sensu Magnoliophyta)                                                  |
| AT1G30620 | 0                  | 0                        | 0               | 0                           | 1                 | 1                  | GO:0009832    | cell wall biosynthesis (sensu Magnoliophyta)                                     |
| AT1G35620 | 1                  | 1                        | 1               | 1                           | 1                 | 1                  | GO:0009505    | cell wall (sensu Magnoliophyta)                                                  |
| AT1G53840 | 1                  | 1                        | 1               | 0                           | 1                 | 0                  | GO:0009505    | cell wall (sensu Magnoliophyta)                                                  |
| AT1G55850 | 1                  | 1                        | 1               | 0                           | 0                 | 0                  | GO:0009832    | cell wall biosynthesis (sensu Magnoliophyta)                                     |
|           |                    |                          |                 |                             |                   |                    | GO:0016759    | cellulose synthase activity                                                      |
| AT1G72730 | 0                  | 0                        | 1               | 0                           | 0                 | 0                  | GO:0009505    | cell wall (sensu Magnoliophyta)                                                  |
| AT2G01720 | 1                  | 1                        | 1               | 0                           | 1                 | 1                  | GO:0009505    | cell wall (sensu Magnoliophyta)                                                  |
| AT2G01970 | 1                  | 0                        | 1               | 1                           | 1                 | 1                  | GO:0009505    | cell wall (sensu Magnoliophyta)                                                  |
| AT2G15390 | 1                  | 0                        | 0               | 0                           | 0                 | 0                  | GO:0042546    | cell wall biosynthesis                                                           |
| AT2G28790 | 0                  | 0                        | 0               | 1                           | 1                 | 0                  | GO:0009505    | cell wall (sensu Magnoliophyta)                                                  |
| AT2G30490 | 1                  | 1                        | 1               | 1                           | 1                 | 1                  | GO:0009505    | cell wall (sensu Magnoliophyta)                                                  |
| AT2G47470 | 1                  | 1                        | 1               | 1                           | 1                 | 1                  | GO:0009505    | cell wall (sensu Magnoliophyta)                                                  |
| AT3G02880 | 1                  | 0                        | 1               | 0                           | 1                 | 0                  | GO:0009505    | cell wall (sensu Magnoliophyta)                                                  |
| AT3G03220 | 0                  | 0                        | 0               | 0                           | 1                 | 0                  | GO:0009831    | cell wall modification during multidimensional cell growth (sensu Magnoliophyta) |
| AT3G03050 | 1                  | 0                        | 0               | 0                           | 0                 | 0                  | GO:0009832    | cell wall biosynthesis (sensu Magnoliophyta)                                     |
|           |                    |                          |                 |                             |                   |                    | GO:0016759    | cellulose synthase activity                                                      |
| AT3G03060 | 0                  | 1                        | 0               | 1                           | 0                 | 0                  | GO:0009505    | cell wall (sensu Magnoliophyta)                                                  |
| AT3G07330 | 0                  | 1                        | 0               | 0                           | 0                 | 0                  | GO:0016759    | cellulose synthase activity                                                      |

**Supplementary Tables pertaining to Figure 3**

**Supplementary Table S21. Proteins of the root cellular proteome with gene ontology (GO) annotations associated with the cell wall**

| Locus     | Root Hairs (COBL9) | Non-Hair Epidermis (WER) | Cortex (CORTEX) | Endodermis/ Quiescent (SCR) | Vasculature (WOL) | Columella (PET111) | GO Identifier | GO Description                                                                   |
|-----------|--------------------|--------------------------|-----------------|-----------------------------|-------------------|--------------------|---------------|----------------------------------------------------------------------------------|
| AT3G08550 | 1                  | 0                        | 0               | 0                           | 0                 | 0                  | GO:0009831    | cell wall modification during multidimensional cell growth (sensu Magnoliophyta) |
|           |                    |                          |                 |                             |                   |                    | GO:0030244    | cellulose biosynthesis                                                           |
| AT3G13870 | 1                  | 1                        | 1               | 0                           | 1                 | 1                  | GO:0009832    | cell wall biosynthesis (sensu Magnoliophyta)                                     |
| AT3G27280 | 1                  | 1                        | 1               | 1                           | 0                 | 1                  | GO:0009505    | cell wall (sensu Magnoliophyta)                                                  |
| AT3G57030 | 0                  | 0                        | 0               | 0                           | 1                 | 1                  | GO:0009505    | cell wall (sensu Magnoliophyta)                                                  |
| AT3G62360 | 1                  | 1                        | 1               | 1                           | 1                 | 1                  | GO:0009505    | cell wall (sensu Magnoliophyta)                                                  |
| AT4G11150 | 1                  | 1                        | 1               | 1                           | 1                 | 1                  | GO:0009832    | cell wall biosynthesis (sensu Magnoliophyta)                                     |
| AT4G12420 | 0                  | 1                        | 1               | 0                           | 0                 | 0                  | GO:0009505    | cell wall (sensu Magnoliophyta)                                                  |
| AT4G18030 | 1                  | 1                        | 1               | 1                           | 1                 | 1                  | GO:0009505    | cell wall (sensu Magnoliophyta)                                                  |
| AT4G20830 | 1                  | 0                        | 0               | 0                           | 1                 | 0                  | GO:0009505    | cell wall (sensu Magnoliophyta)                                                  |
| AT4G21150 | 1                  | 1                        | 1               | 1                           | 1                 | 1                  | GO:0009505    | cell wall (sensu Magnoliophyta)                                                  |
| AT4G32410 | 1                  | 1                        | 1               | 1                           | 1                 | 0                  | GO:0009832    | cell wall biosynthesis (sensu Magnoliophyta)                                     |
|           |                    |                          |                 |                             |                   |                    | GO:0009833    | primary cell wall biosynthesis (sensu Magnoliophyta)                             |
|           |                    |                          |                 |                             |                   |                    | GO:0030244    | cellulose biosynthesis                                                           |
|           |                    |                          |                 |                             |                   |                    | GO:0016759    | cellulose synthase activity                                                      |
| AT5G02260 | 0                  | 1                        | 0               | 0                           | 0                 | 0                  | GO:0009831    | cell wall modification during multidimensional cell growth (sensu Magnoliophyta) |
| AT5G04960 | 1                  | 0                        | 0               | 0                           | 0                 | 0                  | GO:0009505    | cell wall (sensu Magnoliophyta)                                                  |
| AT5G05170 | 1                  | 1                        | 1               | 1                           | 1                 | 0                  | GO:0009833    | primary cell wall biosynthesis (sensu Magnoliophyta)                             |
|           |                    |                          |                 |                             |                   |                    | GO:0016759    | cellulose synthase activity                                                      |
|           |                    |                          |                 |                             |                   |                    | GO:0030244    | cellulose biosynthesis                                                           |

**Supplementary Tables pertaining to Figure 3**

**Supplementary Table S21. Proteins of the root cellular proteome with gene ontology (GO) annotations associated with the cell wall**

| Locus     | Root Hairs (COBL9) | Non-Hair Epidermis (WER) | Cortex (CORTEX) | Endodermis/ Quiescent (SCR) | Vasculature (WOL) | Columella (PET111) | GO Identifier | GO Description                                       |
|-----------|--------------------|--------------------------|-----------------|-----------------------------|-------------------|--------------------|---------------|------------------------------------------------------|
| AT5G14430 | 0                  | 1                        | 1               | 0                           | 0                 | 0                  | GO:0009505    | cell wall (sensu Magnoliophyta)                      |
| AT5G16510 | 1                  | 0                        | 1               | 0                           | 1                 | 0                  | GO:0009505    | cell wall (sensu Magnoliophyta)                      |
|           |                    |                          |                 |                             |                   |                    | GO:0030244    | cellulose biosynthesis                               |
| AT5G16590 | 1                  | 0                        | 1               | 1                           | 1                 | 0                  | GO:0009505    | cell wall (sensu Magnoliophyta)                      |
| AT5G17770 | 1                  | 1                        | 1               | 1                           | 1                 | 1                  | GO:0009505    | cell wall (sensu Magnoliophyta)                      |
| AT5G17820 | 1                  | 1                        | 0               | 1                           | 1                 | 0                  | GO:0009505    | cell wall (sensu Magnoliophyta)                      |
| AT5G20080 | 1                  | 0                        | 1               | 1                           | 1                 | 1                  | GO:0009505    | cell wall (sensu Magnoliophyta)                      |
| AT5G20950 | 0                  | 0                        | 1               | 0                           | 0                 | 0                  | GO:0009505    | cell wall (sensu Magnoliophyta)                      |
| AT5G37310 | 1                  | 0                        | 0               | 0                           | 0                 | 1                  | GO:0009505    | cell wall (sensu Magnoliophyta)                      |
| AT5G49720 | 1                  | 0                        | 1               | 0                           | 1                 | 0                  | GO:0008810    | cellulase activity                                   |
|           |                    |                          |                 |                             |                   |                    | GO:0030244    | cellulose biosynthesis                               |
| AT5G60920 | 0                  | 0                        | 1               | 0                           | 1                 | 0                  | GO:0009505    | cell wall (sensu Magnoliophyta)                      |
|           |                    |                          |                 |                             |                   |                    | GO:0010215    | cellulose microfibril organization                   |
| AT5G61790 | 1                  | 1                        | 1               | 1                           | 1                 | 1                  | GO:0009505    | cell wall (sensu Magnoliophyta)                      |
| AT5G63840 | 1                  | 1                        | 1               | 1                           | 1                 | 1                  | GO:0030244    | cellulose biosynthesis                               |
| AT5G64740 | 1                  | 0                        | 0               | 0                           | 1                 | 0                  | GO:0009833    | primary cell wall biosynthesis (sensu Magnoliophyta) |
|           |                    |                          |                 |                             |                   |                    | GO:0009832    | cell wall biosynthesis (sensu Magnoliophyta)         |
|           |                    |                          |                 |                             |                   |                    | GO:0016759    | cellulose synthase activity                          |
|           |                    |                          |                 |                             |                   |                    | GO:0030244    | cellulose biosynthesis                               |
| AT5G65430 | 1                  | 0                        | 0               | 1                           | 1                 | 0                  | GO:0009505    | cell wall (sensu Magnoliophyta)                      |
| AT5G66680 | 1                  | 1                        | 1               | 1                           | 1                 | 1                  | GO:0009505    | cell wall (sensu Magnoliophyta)                      |
